# Supplementary material for: Optogenetic induction of appetitive and aversive taste memories in Drosophila
Source: eLife. 2023 Sep 26;12:e81535. doi: 10.7554/eLife.81535 (PMC10561975; doi:10.7554/eLife.81535)
Supplement: Figure 1—figure supplement 1—source data 1. [file elife-81535-fig1-figsupp1-data1.xlsx]

## Sheet: b) PPK23glut STM
Training			Testing
PI: ret -	PI:ret +		PI: ret -	PI:ret +
0.222222	-0.854545		-0.227273	0.18859
0.442623	0.625		0.799523	0.387446
0.933735	-0.142857		0.650394	0.909598
-0.313725	0.0909091		0.865169	0.923439
-0.301205	0.573034		0.852608	0
0.642384	-0.304348		0.418605	-0.882353
0.278351	-0.440994		0.898438	-0.342105
0.222222	-0.789474		0.945983	0.56044
0.655502	0.422619		0.72549	0.292035
-0.175141	0.461538		-0.103448	0.368421
0.936508	0.666667		0.272727	0.529412
0.285714	0.472803		0.808219	0.9
0.125	-0.333333		0.944277	-0.169231
0.840764	0.568627		0.62963	0.139579
0.937778	0.386139		0.888466	0.548023
0.516484	-0.521739		0.889655	0.5
0.04	-0.146497		-0.506849	-0.901235
0.390071	0.652893		0.737143	0.277778
0.912046	0.473684		0.583893	0.0232558
-0.315789	0.443299		0.653696	0.882051
0.721519	0.173913		0.626168	0.431472
0.540616	0.773399		0.496774	0.726984
0.549451			0.821656	0.730769
0.716923			0.638554	0.943574
0.824561			0.703565
0.652406			0.854442
0.847682			0.742441
			0.706977
			0.88743
			0.840563

## Sheet: c) Gr64f STM
Training			Testing
PI: ret -	PI:ret +		PI: ret -	PI:ret +
0.100671	0.339731		0.229167	0.362319
0.314286	0.728507		0.483871	0.70684
0.960291	0.224299		-0.191489	0.730769
0.571429	0.680851		-0.298701	0.603306
-0.0833333	0.790541		0.105263	-0.259843
0.118644	0.626263		-0.228571	0.404908
-0.424501	0.824561		0.284133	0.666667
-0.189873	0.718245		-0.0442478	0.727273
0.471429	0.552239		0.356643	-0.641379
0.981081	0.59596		0.252174	0.1
0.752809	0.22		-0.300493	0.623077
0.653543	0.46798		0.368421	0.218569
-0.2	0.441654		0.628205	0.479452
0.610526	0.665158		0.186441	0.688889
0.577465	0.297189		0.7577	0.343284
0.632184	0.304348		0.172414	0.480663
0.958763	0.794239		-0.157895	0.804878
0.105263	0.681759			0.503497
0.950943	0.867178		-0.423077	0.4
0.143813	0.892909		0.25	0.657407
-0.0348837	0.428215		0.00343643	0.0909091
0.222222	0.6		0.425532	-0.345133
0.1875	0.816712		-0.55102	0.607143
0.463415	0.767554		0.706294	0.616236
0.431373	0.596215		-0.276596	-0.182045
-0.0447761	0.495702		-0.185629	0.483516
0.87931	0.222857		0.305785	0.524355
-0.351351	0.657831		0.258907	0.846626
-0.210084	0.381818			0.389937
-0.111111	0.573333			0.468951
-0.714286	0.946524
	0.206897
	0.632653
	0.36
	0.88089
	0.331325

## Sheet: d) Gr64f LTM
Training			Testing
PI: ret -	PI:ret +		PI: ret -	PI:ret +
-0.030303	0.569231		-0.561644	0.244444
-0.306273	0.868235		0.736842	0.643653
0.556757	0.44385		-0.117647	0.537396
-0.877863	0.801556		0.626822	0.689815
0.25	0.757009		-0.2	0.801325
0.598086	0.89083		0.246637	0.576389
0.870968	0.610667		0.0121951	0.405797
-0.349112	0.660147		-0.185185	0.648903
0.0638298	0.906158		0.0960452	-0.101083
0.35	0.432836		-0.117175	0.330317
0.185185	0.606742		-0.817378	0.312336
0.28	0.930712		-0.4375	0.0653266
0.471698	0.391304		0.497207	0.5
0.277778	-0.0909091			0.372781
0.755102	0.750235			0.544828
-0.689655	0.730519
0.102041	0.504302
-0.04	0.6901
0.0344828	0.559286
	0.800554
	0.282759

## Sheet: e) Gr66a LTM
Training			Testing
PI: ret -	PI:ret +		PI: ret -	PI:ret +
0.587786	-0.36		0.893878	0.839122
0.171717	-0.642857		0.851852	0.574803
0.795918	-0.877551		0.744076	0.711111
0.618605	-0.2		0.866005	0.285714
0.5	0.4		0.844444	0.767123
0.782278	-0.684211		0.865009	0.936782
0.4	-0.333333		0.76494	0.969739
-0.375	-0.424242		0.568106	0.927461
0.713115	-0.759036		0.72093	0.738947
0.286957	0.5625		0.853403	0.830832
0.52	-0.333333		0.858779	0.85752
-0.413043	0.333333		0.869376	0.894161
0.648033	-0.04		0.537931	0.799087
0.293413	-0.647059		0.917526	0.803357
0.68932	-0.217391		0.570698	0.927273
0.227273	0.333333		0.902778	0.962639
-0.011583	-0.636364		0.372152	0.77709
0.72973	0.419355		0.935723	0.813084
0.798817	-0.529412		0.130081	0.820802
	-0.785714			0.960784
	-0.367521			0.821801
