# Supplementary material for: Optogenetic induction of appetitive and aversive taste memories in Drosophila
Source: eLife. 2023 Sep 26;12:e81535. doi: 10.7554/eLife.81535 (PMC10561975; doi:10.7554/eLife.81535)
Supplement: Figure 1—source data 1. [file elife-81535-fig1-data1.xlsx]

## Sheet: B) Gr66a STM
Preference indices																		timecurve PI - Testing
Training					Testing													Gr66a>CsChrimson ret +																															Gr66a>CsChrimson ret -
PI: ret -	PI:ret +	PI: +>Chrimson	PI:+>Gr66a		PI: ret -	PI:ret +	PI: +>Chrimson	PI:+>Gr66a										0	0	0	0	0	0	0	0	0	0	0	0	0	0	0	0	0	0	0	0	0	0	0	0	0	0	0	0	0	0		0
0.176471	0.428571	0.464286	0.911824		0.645094	-0.673469	0.426184	0.726346										0	0	0	0	0	0	0	0	0	0	0	0	0	0	0	0	0	0	0	0	0	0	0	0	0	0	0	0	0	0		0
0.0647482	-0.764706	0.0666667	0.73913		-0.368421	0.648449	0.713816	0.817491										0	0	0	0	0	0	0	0	0	0	0	0	0	0	0	0	0	0	0	0	0	0	0	0	0	0	0	0	0	0		0
0.714286	-0.357143	0.857143	0.467085		0.938433	0.0867052	0.947769	0.699164										0	0	0	0	0	0	0	0	0	0	0	0	0	0	0	0	0	0	0	0	0	0	0	0	0	0	0	0	0	0		0
0.705882	-0.647059	0.678571	0.902798		0.921951	0.42029	0.561531	0.545571										0	0	0	0	0	0	0	0	0	0	0	0	0	0	0	0	0	0	0	0	0	0	0	0	0	0	0	0	0	0		0
0.744	-0.657143	0.960993	0.808		0.592593	-0.636364	0.108108	0.460833										0	0	0	0	0	0	0	0	0	0	0	0	0	0	0	0	0	0	0	0	0	0	0	0	0	0	0	0	0	0		0
0.916297	-0.466667	0.276596	0.946539		0.0649351	0.785016	0.436346	0.76087										0	0	0	0	0	0	0	0	0	0	0	0	0	0	0	0	0	0	0	0	0	0	0	0	0	0	0	0	0	0		0
0.908815	0.757225	0.931183	0.894737		0.685767	0.138264	0.757576	0.690092										0	0	0	0	0	0	0	0	0	0	0	0	0	0	0	0	0.333333	0	0	0	0	0	0	0	0	0	0	0	0	0		0
0.835938	-0.672727	0.851852	0.645998		0.706122	0.385621	0.701639	0.711482										0	0	0	0	0	0	0	0	0	0	0	0	0	0	0	0	0.5	0	0	0	0	0	0	0	0	0	0	0	0	0		0
0.811366	-0.375	0.547945	0.918434		0.54195	0.717278	0.937639	0.526539										0	0	0	0	0	0	0	0	0	0	0	0	0	0	0	0	0.5	0	0	0	0	0	0	0	0	0	0	0	0	0		0
0.904628	-0.22807	0.627907	0.560365		0.843501	0.313901	0.603054	0.493243										0	0	0	0	0	0	0	0	0	0	0	0	0	0	0	0	0.6	0	0	0	0	0	0	0	0	0	0	0	0	0		0
0.779592	-0.625	0.734807	0.662651		0.880252	0.534884	0.793706	0.912596										0	0	0	0	0	0	0	0	0	0	0	0	0	0	0	0	0.666667	0	0	0	0	0	0	0	0	0	0	0	0	0		0
0.679739	-0.268293	0.515151	0.350588		0.89404	-0.466667	0.918033	0.971113										0	0	0	0	0	0	0	0	0	0	0	0	0	0	0	0	0.714286	0	0	0	0	0	0	0	0	0	0	0	0	0		0
-0.0909091	0.759563	-0.263158	0.350254		0.909408	0.798165	0.460526	0.542553										0	0	0	0	0	0	0	0	0	0	0	0	0	0	0	0	0.777778	0	0	0	0	0	0	0	0	0	0	0	0	0		0
0.4	-0.142857	0.333333	-0.942857		0.950355	0.716814	0.920269	0.408163										0	0	0	0	0.5	0	0	0	0	0	0	0	0	0	0	0	0.777778	0	0	0	0	0	0	0	0	0	0	0	0	0		0
0.365854	0.875	0.740741	-0.588235		0.973171	0.671642	0.589147	0.384615										0	0	0	0	0.5	0	0	0	0	0	0	0	0	0	0	0	0.8	0	0	0	0	0	0	0	0	0	0	0	0	0		0
0.538462	-0.52381	0.881188	-0.516129		0.811966	0.635037	0.79646	0.60274										0	0	0	0	0.5	0	0	0	0	0	0	0	0	0	0	0	0.8	0	0	0	0	0	0	0	0	0	0	0	0	0		0
	0.166667	0.694915	-0.130435		0.88141	0.930894	0.870968	0.661944										0	0	0	0	0.5	0	0	-0.5	0	0	0	0	0	0	0	0	0.8	0	0	0	0	0	0	0	0	0	0	0	0	0		0
	0.377049	0.968421	0.987312		0.713755	0.413793		0.625754										0	0	0	0	0.5	0	0	-0.5	0	0	0	0	0	0	0	0	0.666667	0	0	0	0	0	0	0	0	0	0	0	0	0		0
	-0.733333	0.634409	0.415584		0.850746	0.192893												0	0	0	0	0.666667	0	0	-0.5	0	0	0	0	0	0	0	0	0.666667	0	0	0	0	0	0	0	0	0	0	0	0	0		0
	-0.346939	0.688312			0.890777	0.46988												0	0	0	0	0.666667	0	0	-0.5	0	0	0	0	0	0	0	0	0.692308	0	0	0	0	0	0	0	0	0	0	0	0	0		0
	-0.791667	0.961814				-0.772727												0	0	0	0	0.666667	0	0	-0.5	0	0	0	0	0	0	0	0	0.692308	0	0	0	0	0	0	0	0	0	0	0	0	0		0
	0.030303					0.861027												0	0	0	0	0.666667	0	0	-0.5	0	0	0	0	0	0	0	0	0.692308	0	0	0	0	0	0	0	0	0	0	0	0	0		0
	-0.276316					0.710037												0	0	0	0	0.666667	0	0	-0.5	0	0	0	0	0	0	0	0	0.692308	0	0	0	0	0	0	0	0	0	0	0	0	0		0
	-0.826087					0.670732												0	0	0	0	0.666667	0	0	-0.5	0	0	0	0	0	0	0	0	0.571429	0	0	0	0	0	0	0	0	0	0	0	0	0		0
	0.6					-0.285714												0	0	0	0	0.666667	0	0	0	0	0	0	0	0	0	0	0	0.571429	0	0	0	0	0	0	0	0	0	0	0	0	0		0
	-0.824561					-0.170455												0	0	0	0	0.666667	0	0	0.142857	0	0	0	0	0	0	0	0	0.6	0	0	0	0	0	0	0	0	0	0	0	0	0		0
	-0.933333					-0.857143												0	0	0	0	0.666667	0	0	0.142857	0	0	0	0	0	0	0	0	0.625	0	0	0	0	0	0	0	0	0	0	0	0	0		0
	-0.421687					0.47973												0	0	0	0	0.666667	0	0	0.142857	0	0	0	0	0	0	0	0	0.625	0	0	0	0	0	0	0	0	0	0	0	0	0		0
	-0.376623					-0.41												0	0	0	0	0.666667	0	0	0.142857	0	0	0	0	0	0	0	0	0.625	0	0	0	0	0	0	0	0	0	0	0	0	0		0
						0.171717												0	0	0	0	0.666667	0	0	0.142857	0	0	0	0	0	0	0	0	0.647059	0	0	0	0	0	0	0	0	0	0	0	0	0		0
																		0	0	0	0	0.666667	0	0	0.142857	0	0	0	0	0	0	0	0	0.647059	0	0	0	0	0	0	0	0	0	0	0	0	0		0
																		0	0	0	0	0.666667	0	0	0.142857	0	0	0	0	0	0	0	0	0.647059	0	0	0	0	0	0	0	0	0	0	0	0	0		0
																		0	0	0	0	0.666667	0	0	0.142857	0	0	0	0	0	0	0	0	0.684211	0	0	0	0	0	0	0	0	0	0	0	0	0		0
Interactions																		0	0	0	0	0.666667	0	0	0.142857	0	0	0	0	0	0	0	0	0.619048	0	0	0	0	0	0	0	0	0	0	0	0	0		0
Gr66a>Chr, ret+			Gr66a>Chr, ret-			"+/Chr"			Gr66a/+									0	0	0	0	0.666667	0	0	0.142857	0	0	0	0	0	0	0	0	0.619048	0	0	0	0	0	0	0	0	0	0	0	0	0		0
Suc	Agar		Suc	Agar		Suc	Agar		Suc	Agar								0	0	0	0	0.666667	0	0	0.142857	0	0	0	0	0	0	0	0	0.619048	0	0	0	0	0	0	0	0	0	0	0	0	0		0
16	82		394	85		256	103		593	94								0	0	0	0	0.666667	0	0	0.142857	0	0	0	0	0	0	0	0	0.652174	0	0	0	0	0	0	0	0	0	0	0	0	0		0
558	119		42	91		521	87		956	96								0	0	0	0	0.666667	0	0	0.142857	0	0	0	0	0	0	0	0	0.666667	0	0	0	0	0	0	0	0	-0.333333	0	0	0	0		0
94	79		1039	33		895	24		1220	216								0	0	0	0	0.666667	0	0	0.142857	0	0	0	0	0	0	0.5	0	0.666667	0	0	-0.333333	0	0	0	0	0	-0.333333	0	0	0	0		0
343	140		197	8		755	212		602	177								0	0	0	0	0.666667	0	0	0.142857	0	0	0	0	0	0	0.666667	0	0.666667	0	0	-0.333333	0	0	0	0	0	-0.333333	0	0	0	0		0
6	27		86	22		41	33		1035	382								0	0	0	0	0.666667	0	0	0.142857	0	0	0	0	0	0	0.666667	0	0.68	0	0	-0.333333	0	0	0	0	0	-0.333333	0	0	0	0		0
822	99		123	108		739	290		324	44								0	0	0	0	0.666667	0	0	0.142857	0	0	0	0	0	0	0.666667	0	0.68	0	0	-0.333333	0	0	0	0	0	-0.333333	0	0	0	0		0
177	134		456	85		29	4		1467	269								0	0	0	0	0.666667	0	0	0.142857	0	0	0	0	0	0	0.666667	0	0.68	0	0	-0.333333	0	0	0	0	0	-0.333333	0	0	0	0		0
106	47		209	36		519	91		872	147								0	0	0	0	0.666667	0	0	0.142857	0	0	0	0	0	0	0.666667	0	0.692308	0	0	-0.333333	0	0	0	0	0	-0.333333	0	0	0	0		0
328	54		680	202		435	14		719	223								0	0	0	0	0.666667	0	0	0.142857	0	0	0	0	0	0	0.666667	0	0.692308	0	0	-0.333333	0	0	0	0	0	-0.333333	0	0	0	0		0
293	153		695	59		105	26		663	225								0	0	0	0	0.666667	0	0	0.142857	0	0	0	0	0	0	0.666667	0	0.692308	0	0	-0.333333	0	0	0	0	0	-0.333333	0	0	0	0		0
99	30		895	57		513	59		372	17								0	0	0	0	0.666667	0	0	0.142857	0	0	0	0	0	0	0.666667	0	0.692308	0	0	-0.333333	0	0	0	0	0	-0.333333	0	0	0	0		0
12	33		715	40		117	5		2320	34								0	0	0	0	0.666667	0	0	0.142857	0	0	0	0	0	0	0.666667	0	0.703704	0	0	-0.333333	0	0	0	0	0	-0.333333	0	0	0	0		0
294	33		274	13		111	41		435	129								0	0	0	0	0.666667	0	0	0.142857	0	0	0	0	0	0	0.666667	0	0.703704	0	0	-0.333333	0	0	0	0	0	-0.333333	0	0	0	0		0
97	16		275	7		2288	95		69	29								0	0	0	0	0.666667	0	0	0.142857	0	0	0	0	0	0	0.666667	0	0.714286	0	0	-0.333333	0	0	0	0	0	-0.333333	0	0	0	0		0
56	11		2427	33		205	53		18	8								0	0	0	0	0.666667	0	0	0.142857	0	-0.333333	0	0	0	0	0.666667	0	0.724138	0	0	-0.333333	0	0	0	0	0	-0.333333	0	0	0	0		0
336	75		106	11		406	46		234	58								0	0	0	0	0.666667	0	0	0.142857	0	-0.333333	0	0	0	0	0.666667	0	0.677419	0	0	-0.333333	0	0	0	0	0	-0.333333	0	0	0	0		0
475	17		587	37		87	6		1701	346								0	0	0	0	0.666667	0	0	0.142857	0	-0.333333	0	0	0	0	0.666667	0	0.677419	0	0	-0.333333	0	0	0	0	0	-0.333333	0	0	0	0		0
123	51		461	77					404	93								0	0	0	0	0.666667	0	0	0.142857	0	-0.333333	0	0	0	0	0.666667	0	0.677419	0.333333	0	-0.333333	0	0	0	0	0	-0.333333	0	0	0	0		0
705	477		310	25														0	0	0	0	0.666667	0	0	0.142857	0	-0.333333	0	0	0	0	0.666667	0	0.6875	0.333333	0	-0.333333	0	0	0	0	0	-0.333333	0	0	0	0		0
305	110		779	45														0	0	0	0	0.666667	0	0	0.142857	0	-0.333333	0	0	0	0	0.666667	0	0.6875	0.333333	0	-0.333333	0	0	0	0	0	-0.333333	0	0	0	0		0
10	78																	0	0	0	0	0.666667	0	0	0.142857	0	-0.333333	0	0	0	0	0.666667	0	0.6875	0.333333	0	-0.333333	0	0	0	0	0	-0.333333	0	0	0	0		0
308	23																	0	0	0	0	0.666667	0	0	0.142857	0	-0.333333	0	0	0	0	0.666667	0	0.6875	0.333333	0	-0.333333	0	0	0	0	0	-0.333333	0.6	0	0	0		0
920	156																	0	-0.5	0	0	0.666667	0	0	0.142857	0	-0.333333	0	0	0	0	0.666667	0	0.69697	0.333333	0	-0.333333	0	0	0	0	0	-0.333333	0.6	0	0	0		0
137	27																	0	-0.5	0	0	0.666667	0	0	0.142857	0	-0.333333	0	0	0	0	0.666667	0	0.69697	0.333333	0	-0.333333	0	0	0	0	0	-0.333333	0.6	0	0	0		0
15	27																	0	-0.5	0	0	0.666667	0	0	0.142857	0	-0.333333	0	0	0	0	0.666667	0	0.69697	0.333333	0	-0.333333	0	0	0	0	0	-0.333333	0.6	0	0	0		0
73	103																	0	-0.5	0	0	0.666667	0	0	0.142857	0	-0.333333	0	0	0	0	0.666667	0	0.705882	0.333333	0	-0.333333	0	0	0	0	0	-0.333333	0.6	0	0	0		0
6	78																	0	-0.5	0	0	0.666667	0	0	0.142857	0	-0.333333	0	0	0	0	0.666667	0	0.714286	0.333333	0	-0.333333	0	0	0	0	0	-0.333333	0.6	0	0	0		0
219	77																	0	-0.5	0	0	0.666667	0	0	0.142857	0	-0.333333	0	0	0	0	0.666667	0	0.714286	0.333333	0	-0.333333	0	0	0	0	0	-0.333333	0.6	0	0	0		0
118	282																	0	-0.5	0	0	0.666667	0	0	0.142857	0	-0.333333	0	0	0	0	0.666667	0	0.714286	0.333333	0	-0.333333	0	0	0	0	0	-0.333333	0.6	0	0	0		0
58	41																	0	-0.5	0	0	0.666667	0	0	0.142857	0	-0.333333	0	0	0	0	0.666667	0	0.714286	0.333333	0	-0.333333	0	0	0	0	0	-0.333333	0.6	0	0	0		0
																		0	-0.5	0	0	0.666667	0	0	0.142857	0	-0.333333	0	0	0	0	0.666667	0	0.722222	0.333333	0	-0.333333	0	0	0	0	0	-0.333333	0.6	0	0	0		0
																		0	-0.5	0	0	0.666667	0	0	0.142857	0	-0.333333	0	0	0	0	0.666667	0	0.722222	0.333333	0	-0.333333	0	0	0	0	0	-0.333333	0.6	0	0	0		0
																		0	-0.5	0	0	0.714286	0	0	0.142857	0	-0.333333	0	0	0	0	0.666667	0	0.722222	0.333333	0	-0.333333	0	0	0	0	0	-0.333333	0.6	0	0	0		0
																		0	-0.5	0	0	0.333333	0	0	0.142857	0	-0.333333	0	0	0	0	0.666667	0	0.72973	0.333333	0	-0.333333	0	0	0	0	0	-0.333333	0.6	0	0	0		0
																		0	-0.5	0	0	0.333333	0	0	0.142857	0	-0.333333	0	0	0	0	0.666667	0	0.72973	0.333333	0	-0.333333	0	0	0	0	0	-0.333333	0.6	0	0	0		0
																		0	-0.5	0	0	0.333333	0	0	0.142857	0	-0.333333	0	0	0	0	0.666667	0	0.72973	0.333333	0	-0.333333	0	0	0	0	0	-0.333333	0.6	0	0	0		0
																		0	-0.5	0	0	0.333333	0	0	0.142857	0	-0.333333	0	0	0	0	0.666667	0	0.72973	0.333333	0	-0.6	0	0	0	0	0	-0.333333	0.6	0	0	0		0
																		0	-0.5	0	0	0.333333	0	0	0.142857	0	-0.333333	0	0	0	0	0.666667	0	0.72973	0.333333	0	-0.6	0	0	0	0	0	-0.333333	0.6	0	0	0		0
																		0	-0.5	0	0	0.333333	0	0	0.142857	0	-0.333333	0	0	0	0	0.666667	0	0.74359	0.333333	0	-0.6	0	0	0	0	0	-0.333333	0.6	0	0	0		0
																		0	-0.5	0	0	0.333333	0	0	0.142857	0	-0.333333	0	0	0	0	0.666667	0	0.74359	0.333333	0	-0.6	0	0	0	0	0	-0.333333	0.6	0	0	0		0
																		0	-0.5	0	0	0.333333	0	0	0.142857	0	-0.333333	0	0	0	0	0.666667	0	0.74359	0.333333	0	-0.6	0	0	0	0	0	-0.333333	0.6	0	0	0		0
																		0	-0.5	0	0	0.333333	0	0	0.142857	0	-0.333333	0	0	0	0	0.666667	0	0.74359	0.333333	0	-0.6	0	0	0	0	0.6	-0.333333	0.6	0	0	0		0
																		0	-0.5	0	0	0.333333	0	0	0.142857	0	-0.333333	0	0	0	0	0.666667	0	0.74359	0.333333	0	-0.6	0	0	0	0	0.6	-0.333333	0.6	0	0	0		0
																		0	-0.5	0	0	0.333333	0	0	0.142857	0	-0.333333	0	0	0	0	0.666667	0	0.74359	0.333333	0	-0.6	0	0	0	0	0.6	-0.333333	0.6	0	0.333333	0		0
																		0	-0.5	0	0	0.333333	0	0	0.142857	0	-0.333333	0	0	0	0	0.666667	0	0.75	0.333333	0	-0.6	0	0	0	0	0.6	-0.333333	0.6	0	0.333333	0		0
																		0	-0.5	0	0	0.333333	-0.333333	0	0.142857	0	-0.333333	0	0	0	0	0.666667	0	0.75	0.333333	0	-0.6	0	0	0	0	0.6	-0.333333	0.6	0	0.333333	0		0
																		0	-0.5	0	0	0.4	-0.333333	0	0.142857	0	-0.333333	0	0	0	0	0.666667	0	0.75	0.333333	0	-0.6	0	0	0	0	0.6	-0.333333	0.6	0	0.333333	0		0
																		0	-0.5	0	0	0.4	-0.333333	0	0.142857	0	-0.333333	0	0	0	0	0.666667	0	0.75	0.333333	0	-0.6	0	0	0	0	0.6	-0.333333	0.6	0	0.333333	0		0
																		0	-0.5	0	0	0.4	-0.333333	0	0.142857	0	-0.333333	0	0	0	0	0.666667	0	0.75	0.333333	0	-0.6	0	0	0	0	0.6	-0.333333	0.6	0	0.333333	0		0
																		0	-0.5	0	0	0.454545	-0.333333	0	0.142857	0	-0.333333	0	0	0	0	0.666667	0	0.75	0.333333	0	-0.6	0	0	0	0	0.6	-0.333333	0.6	0	0.333333	0		0
																		0	-0.5	0	0	0.454545	-0.333333	0	0.142857	0	-0.333333	0	0	0	0	0.666667	0	0.75	0.333333	0	-0.6	0	0	0	0	0.6	-0.333333	0.6	0	0.333333	0		0
																		0	-0.5	0	0	0.454545	-0.333333	0	0.142857	0	-0.333333	0	0	0	0	0.666667	0	0.756098	0.333333	0	-0.666667	0	0	0	0	0.6	-0.333333	0.6	0	0.333333	0		0
																		0	-0.5	0	0	0.454545	-0.333333	0	0.142857	0	-0.333333	0	0	0	0	0.666667	0	0.756098	0.333333	0	-0.666667	0	0	0	0	0.6	-0.333333	0.6	0	0.333333	0		0
																		0	-0.5	0	0	0.454545	-0.333333	0	0.142857	0	-0.333333	0	0	0	0	0.666667	0	0.756098	0.333333	0	-0.666667	0	0	0	0	0.333333	-0.333333	0.6	0	0.333333	0		0
																		0	-0.5	0	0	0.454545	-0.333333	0.333333	0.142857	0	-0.333333	0	0	0	0	0.666667	0	0.756098	0.333333	0	-0.666667	0	0	0	0	0.333333	-0.333333	0.6	0	0.333333	0		0
																		0	-0.5	0	0.333333	0.454545	-0.333333	0.333333	0.142857	0	-0.333333	0	0	0	0	0.666667	0	0.756098	0.333333	0	-0.666667	0	0	0	0	0.333333	-0.333333	0.6	0	0.333333	0		0
																		0	-0.5	0	0.333333	0.454545	-0.333333	0.333333	0.142857	0	-0.333333	0	0	0	0	0.666667	0	0.714286	0.333333	0	-0.666667	0	0	0	0	0.333333	-0.333333	0.6	0	0.333333	0		0
																		0	-0.5	0	0.333333	0.454545	-0.333333	0.333333	0.142857	0	-0.333333	0	0	0	0	0.666667	0	0.714286	0.333333	0	-0.666667	0	0	0	0	0.333333	-0.333333	0.6	0	0.333333	0		0
																		0	-0.5	0	0.333333	0.454545	-0.333333	0.333333	0.142857	0	-0.333333	0	0	0	0	0.666667	0	0.714286	0.333333	0	-0.666667	0	0	0	0	0.333333	-0.333333	0.6	0	0.333333	0		0
																		0	-0.5	0	0.333333	0.454545	-0.333333	0.333333	0.142857	0	-0.333333	0	0	0	0	0.666667	0	0.714286	0.333333	0	-0.666667	-0.333333	0	0	0	0.333333	-0.333333	0.6	0	0.333333	0		0
																		0	-0.5	0	0.333333	0.454545	-0.333333	0.333333	0.142857	0	-0.333333	0	0	0	0	0.666667	0	0.714286	0.333333	0	-0.666667	-0.333333	0	0	0	0.333333	-0.333333	0.6	0	0.333333	0		0
																		0	-0.5	0	0.333333	0.454545	-0.333333	0.333333	0.142857	0	-0.333333	0	0	0	0	0.666667	0	0.714286	0.333333	0	-0.666667	-0.333333	0	0	0	0.333333	-0.333333	0.6	0	0.333333	0		0
																		0	-0.5	0	0.333333	0.454545	-0.333333	0.333333	0.142857	0	-0.333333	0	0	0	0	0.666667	0	0.714286	0.333333	0	-0.666667	-0.333333	0	0	0	0.333333	-0.333333	0.6	0	0.333333	0		-0.333333
																		0	-0.5	0	0.333333	0.454545	-0.333333	0.333333	0.142857	0	-0.333333	0	0	0	0	0.666667	0	0.714286	0.333333	0	-0.666667	-0.333333	0	0	0	0.333333	-0.333333	0.6	0	0.333333	0		-0.333333
																		0	-0.5	0	0.333333	0.454545	-0.333333	0.333333	0.142857	0	-0.333333	0	0	0	0	0.666667	0	0.714286	0.333333	0	-0.666667	-0.333333	0	0	0	0.333333	-0.333333	0.6	0	0.333333	0		-0.333333
																		0	-0.5	0	0.333333	0.454545	-0.333333	0.333333	0.142857	0	-0.333333	0	0	0	0	0.666667	0	0.714286	0.333333	0	-0.666667	-0.333333	0	0	0	0.333333	-0.333333	0.6	0	0.333333	0		-0.333333
																		0	-0.5	0	0.333333	0.454545	-0.333333	0.333333	0.142857	0	-0.333333	0	0	0	0	0.666667	0	0.674419	0.333333	0	-0.666667	-0.333333	0	0	0	0.333333	-0.333333	0.6	0	0.333333	0		-0.333333
																		0	-0.5	0	0.6	0.454545	-0.333333	0.333333	0.142857	0	-0.333333	0	0	0	0	0.666667	0	0.674419	0.333333	0	-0.666667	-0.333333	0	0	0	0.333333	-0.333333	0.6	0	0.333333	0		-0.333333
																		0	-0.5	0	0.6	0.454545	-0.333333	0.333333	0.142857	0	-0.333333	0	0	0	0	0.666667	0	0.674419	0.333333	0	-0.714286	-0.333333	0	0	0	0.333333	-0.333333	0.6	0	0.333333	0		-0.333333
																		0	-0.5	0	0.6	0.454545	-0.333333	0.333333	0.142857	0	-0.333333	0	0	0	0	0.666667	0	0.674419	0.333333	0	-0.714286	-0.333333	0	0	0	0.333333	-0.333333	0.6	0	0.333333	0		-0.333333
																		0	-0.5	0	0.6	0.454545	-0.333333	0.333333	0.142857	0	-0.333333	0	0	0	0	0.666667	0	0.674419	0.333333	0	-0.714286	-0.333333	0	0	0	0.333333	-0.333333	0.6	0	0.333333	0		-0.333333
																		0	-0.5	0	0.6	0.454545	-0.333333	0.333333	0.142857	0	-0.333333	0	0	0	0	0.666667	0	0.674419	0.333333	0	-0.714286	-0.333333	0	0	0	0.333333	-0.333333	0.6	0	0.333333	0		-0.333333
																		0	-0.5	0	0.6	0.454545	-0.333333	0.333333	0.142857	0	-0.333333	0	0	0	0	0.666667	0	0.674419	0.333333	0	-0.714286	-0.333333	0	0	0	0.333333	-0.333333	0.6	0	0.333333	0		-0.333333
																		0	-0.5	0	0.6	0.454545	-0.333333	0.333333	0.142857	0	-0.333333	0	0	0	0	0.666667	0	0.674419	0.333333	0	-0.714286	-0.333333	0	0	0.5	0.142857	-0.333333	0.6	0	0.333333	0		-0.333333
																		0	-0.5	0	0.6	0.454545	-0.333333	0.333333	0.142857	0	-0.333333	0	0	0	0	0.666667	0	0.674419	0.333333	0	-0.714286	-0.333333	0	0	0.5	0.142857	-0.333333	0.6	0	0.333333	0		-0.333333
																		0	-0.5	0	0.6	0.454545	-0.333333	0	0.142857	0	-0.333333	0	0	0	0	0.666667	0	0.681818	0.333333	0	-0.714286	-0.333333	0	0	0.5	0.142857	-0.333333	0.6	0	0.333333	0		-0.333333
																		0	-0.5	0	0.6	0.454545	-0.333333	0	0.142857	0	-0.333333	0	0	0	0	0.666667	0	0.681818	0.333333	0	-0.714286	-0.333333	0	0	0.5	0.142857	-0.333333	0.6	0	0.333333	0		-0.333333
																		0	-0.5	0	0.6	0.454545	-0.333333	0	0.142857	0	-0.333333	0	0	0	0	0.666667	0	0.681818	0.333333	0	-0.8	-0.333333	0	0	0.5	0.142857	-0.333333	0.6	0	0.333333	0		-0.333333
																		0	-0.5	0	0.6	0.454545	-0.333333	0	0.142857	0	-0.333333	0	0	0	0	0.666667	0	0.681818	0.333333	0	-0.8	-0.333333	0	0	0.5	0.142857	-0.333333	0.6	0	0.333333	0		-0.333333
																		0	-0.5	0	0.6	0.454545	-0.333333	0	0.142857	0	-0.333333	0	0	0	0	0.666667	0	0.681818	0.333333	0	-0.8	-0.333333	0	0	0.5	0	-0.333333	0.6	0	0.333333	0		-0.333333
																		0	-0.5	0	0.6	0.454545	-0.333333	0	0.142857	0	-0.333333	0	0	0	0	0.666667	0	0.681818	0.333333	0	-0.8	-0.333333	0	0	0.5	0	-0.333333	0.6	0	0.333333	0		-0.333333
																		0	-0.5	0	0.6	0.454545	-0.333333	0	0.142857	0	-0.333333	0	0	0	0	0.666667	0	0.644444	0.333333	0	-0.8	-0.333333	0	0	0.5	0	-0.333333	0.6	0	0.333333	0		-0.333333
																		0	-0.5	0	0.6	0.454545	-0.333333	0	0.142857	0	-0.333333	0	0	0	0	0.666667	0	0.644444	0.333333	0	-0.8	-0.333333	0	0	0.5	0	-0.333333	0.6	0	0.333333	0		-0.333333
																		0	-0.5	0	0.6	0.454545	-0.333333	0	0.142857	0	-0.333333	0	0	0	0	0.666667	0	0.644444	0.333333	0	-0.8	-0.333333	0	0	0.5	0	-0.333333	0.6	0	0.333333	0		-0.333333
																		0	-0.5	0	0.6	0.454545	-0.333333	0	0.142857	0	-0.333333	0	0	0	0	0.666667	0	0.644444	0.333333	0	-0.8	-0.333333	0	0	0.5	0	-0.333333	0.6	0	0.333333	0		-0.333333
																		0	-0.5	0	0.6	0.454545	-0.333333	0	0.142857	0	-0.333333	0	0	0	0	0.666667	0	0.644444	0.333333	0	-0.8	-0.333333	0	0	0.5	0	-0.333333	0.6	0	0.333333	0		-0.333333
																		0	-0.5	0	0.6	0.454545	-0.333333	0	0.142857	0	-0.333333	0	0	0	0	0.666667	0	0.644444	0.333333	0	-0.8	-0.333333	0	0	0.5	0	-0.333333	0.6	0	0.333333	0		-0.333333
																		0	-0.5	0	0.6	0.454545	-0.333333	0	0.142857	0	-0.333333	0	0	0	0	0.666667	0	0.652174	0.333333	0	-0.8	-0.333333	0	0	0.5	0	-0.333333	0.6	0	0.333333	0		-0.333333
																		0	-0.5	0	0.6	0.454545	-0.333333	0	0.142857	0	-0.333333	0	0	0	0	0.666667	0	0.652174	0.333333	0	-0.8	-0.333333	0	0	0.5	0	-0.333333	0.6	0	0.333333	0		-0.333333
																		0	-0.5	0	0.6	0.5	-0.333333	0	0.142857	0	-0.333333	0	0	0	0	0.666667	0	0.652174	0.333333	0	-0.8	-0.333333	0	0	0.5	0	-0.333333	0.6	0	0.333333	0		-0.333333
																		0	-0.5	0	0.6	0.5	-0.333333	0	0.142857	0	-0.333333	0	0	0	0	0.666667	0	0.652174	0.333333	0	-0.8	-0.333333	0	0	0.5	0	-0.333333	0.6	0	0.333333	0		-0.333333
																		0	-0.5	0	0.6	0.5	-0.333333	0	0.142857	0	-0.333333	0	0	0	0	0.666667	0	0.659574	0.333333	0	-0.8	-0.333333	0	0	0.5	0	-0.333333	0.6	0	0.333333	0		-0.333333
																		0	-0.5	0	0.6	0.5	-0.333333	0	0.142857	0	-0.333333	0	0	0	0	0.666667	0	0.659574	0.333333	0	-0.8	-0.333333	0	0	0.5	0	-0.333333	0.6	0	0.333333	0		-0.333333
																		0	-0.5	0	0.6	0.5	-0.333333	0	0.142857	0	-0.333333	0	0	0	0	0.666667	0	0.659574	0.333333	0	-0.8	-0.333333	0	0	0.5	0	-0.333333	0.6	0	0.333333	-0.333333		-0.333333
																		0	-0.5	0	0.6	0.5	-0.333333	0	0.142857	0	-0.333333	0	0	0	0	0.666667	0	0.659574	0.333333	0	-0.8	-0.333333	0	0	0.5	0	-0.333333	0.6	0	0.333333	-0.5		-0.333333
																		0	-0.5	0	0.6	0.5	-0.333333	0	0.142857	0	-0.333333	0	0	0	0	0.666667	0	0.659574	0.333333	0	-0.8	-0.333333	0	0	0.5	0	-0.333333	0.6	0	0.333333	-0.5		-0.333333
																		0	-0.5	0	0.6	0.5	-0.333333	0	0.142857	0	-0.333333	0	0	0	0	0.666667	0	0.659574	0.333333	0	-0.8	-0.333333	0	0	0.5	0	-0.333333	0.6	0	0.333333	-0.5		-0.333333
																		0	-0.5	0	0.6	0.5	-0.333333	0	0.142857	0	-0.333333	0	0	0	0	0.666667	0	0.659574	0.333333	0	-0.8	-0.333333	0	0	0.5	0	-0.333333	0.6	0	0.333333	-0.5		-0.333333
																		0	-0.5	0	0.6	0.5	-0.333333	0	0.142857	0	-0.333333	0	0	0	0	0.666667	0	0.659574	0.333333	0	-0.8	-0.333333	0	0	0.5	0	-0.333333	0.6	0	0.333333	-0.5		-0.333333
																		0	-0.5	0	0.6	0.5	-0.333333	0	0.142857	0	-0.333333	0	0	0	0	0.666667	0	0.659574	0.333333	0	-0.8	-0.333333	0	0	0.5	0	-0.333333	0.6	0	0.333333	-0.5		-0.333333
																		0	-0.5	0	0.6	0.5	-0.333333	0	0.142857	0	-0.333333	0	0	0	0	0.666667	0	0.659574	0.333333	0	-0.8	-0.333333	0	0	0.818182	0	-0.333333	0.6	0	0.333333	-0.5		-0.333333
																		0	-0.5	0	0.6	0.5	-0.333333	0	0.142857	0	-0.333333	0	0	0	0	0.666667	0	0.666667	0.333333	0	-0.8	-0.333333	0	0	0.846154	0	-0.333333	0.6	0	0.333333	-0.5		-0.333333
																		0	-0.5	0	0.6	0.5	-0.333333	0	0.142857	0	-0.333333	0	0	0	0	0.666667	0	0.666667	0.333333	0	-0.8	-0.333333	0	0	0.846154	0	-0.333333	0.6	0	0.333333	-0.5		-0.333333
																		0	-0.5	0	0.6	0.5	-0.333333	0	0.142857	0	-0.333333	0	0	0	0	0.666667	0	0.666667	0.333333	0	-0.8	-0.333333	0	0	0.846154	-0.111111	-0.333333	0.6	0	0.333333	-0.5		-0.333333
																		0	-0.5	0	0.6	0.5	-0.333333	-0.428571	0.142857	0	-0.333333	0	0	0	0	0.666667	0	0.666667	0.333333	0	-0.8	-0.333333	0	0	0.846154	-0.2	-0.333333	0.6	0	0.333333	-0.5		-0.333333
																		0	-0.2	0	0.6	0.5	-0.333333	-0.428571	0.142857	0	-0.333333	0	0	0	0	0.666667	0	0.673469	0.333333	0	-0.8	-0.333333	0	0	0.846154	-0.2	-0.333333	0.6	0	0.333333	-0.5		-0.333333
																		0	-0.2	0	0.6	0.5	-0.333333	-0.428571	0.142857	0	-0.333333	0	0	0	0	0.666667	0	0.673469	0.333333	0	-0.8	-0.333333	0	0	0.846154	-0.2	-0.333333	0.6	0	0.333333	-0.5		-0.333333
																		0	-0.2	0	0.6	0.5	-0.333333	-0.428571	0.142857	0	-0.333333	0	0	0	0	0.666667	0	0.673469	0.333333	0	-0.8	-0.333333	0	0	0.846154	-0.2	-0.333333	0.6	0	0.333333	-0.5		-0.333333
																		0	-0.2	0	0.6	0.5	-0.333333	-0.428571	0.142857	0	-0.333333	0	0	0	0.333333	0.666667	0	0.673469	0.333333	0	-0.8	-0.333333	0	0	0.846154	-0.2	-0.333333	0.6	0	0.333333	-0.5		-0.333333
																		0	-0.2	0	0.6	0.5	-0.333333	-0.428571	0.142857	0	-0.333333	0	0	0	0.333333	0.666667	0	0.673469	0.333333	0	-0.8	-0.333333	0	0	0.846154	-0.2	-0.333333	0.6	0	0.333333	-0.5		-0.333333
																		0	-0.2	0	0.6	0.5	-0.333333	-0.428571	0.142857	0	-0.333333	0	0	0	0.333333	0.666667	0	0.673469	0.333333	0	-0.8	-0.333333	0	0	0.846154	-0.2	-0.333333	0.6	0	0.333333	-0.5		-0.333333
																		0	-0.2	0	0.6	0.538462	-0.333333	-0.428571	0.142857	0	-0.333333	0	0	0	0.333333	0.666667	0	0.673469	0.333333	0	-0.8	-0.333333	0	0	0.846154	-0.2	-0.333333	0.6	0	0.333333	-0.5		-0.333333
																		0	-0.2	0	0.6	0.538462	-0.333333	-0.428571	0.142857	0	-0.333333	0	0	0	0.333333	0.666667	0	0.64	0.333333	0	-0.8	-0.333333	0	0	0.846154	-0.2	-0.333333	0.6	0	0.333333	-0.5		-0.333333
																		0	-0.2	0	0.6	0.538462	-0.333333	-0.428571	0.142857	0	-0.333333	0	0	0	0.333333	0.666667	0	0.607843	0.333333	0	-0.8	-0.333333	0	0	0.846154	-0.2	-0.333333	0.6	0	0.333333	-0.5		-0.333333
																		0	-0.2	0	0.6	0.538462	-0.333333	-0.428571	0.142857	0	-0.333333	0	0	0	0.333333	0.666667	0	0.607843	0.333333	0	-0.8	-0.333333	0	0	0.846154	-0.2	-0.333333	0.6	0	0.333333	-0.5		-0.333333
																		0	-0.2	0	0.6	0.538462	-0.333333	-0.428571	0.142857	0	-0.333333	0	0	0	0.333333	0.666667	0	0.615385	0.333333	0	-0.818182	-0.333333	0	0	0.846154	-0.2	-0.333333	0.6	0	0.333333	-0.5		-0.333333
																		0	-0.2	0	0.6	0.538462	-0.333333	-0.428571	0.142857	0	-0.333333	0	0	0	0.333333	0.666667	0	0.615385	0.333333	0	-0.818182	-0.333333	0	0	0.846154	-0.2	-0.333333	0.6	0	0.333333	-0.5		-0.333333
																		0	-0.2	0	0.6	0.538462	-0.333333	-0.428571	0.142857	0	-0.333333	0	0	0	0.333333	0.666667	0	0.615385	0.333333	0	-0.818182	-0.333333	0	0	0.846154	-0.2	-0.333333	0.6	0	0.333333	-0.5		-0.333333
																		0	-0.2	0	0.6	0.538462	-0.333333	-0.428571	0.142857	-0.6	-0.333333	0	0	0	0.333333	0.666667	0	0.615385	0.333333	0	-0.833333	-0.333333	0	0	0.846154	-0.2	-0.333333	0.6	0	0.333333	-0.5		-0.333333
																		0	-0.2	0	0.6	0.538462	-0.333333	-0.428571	0.142857	-0.6	-0.333333	0	0	0	0.333333	0.666667	0	0.622641	0.333333	0	-0.833333	-0.333333	0	0	0.846154	-0.2	-0.333333	0.6	0	0.333333	-0.5		-0.333333
																		0	-0.2	0	0.6	0.538462	-0.333333	-0.428571	0.142857	-0.6	-0.333333	0	0	0	0.333333	0.666667	0	0.622641	0.333333	0	-0.833333	-0.333333	0	0	0.846154	-0.2	-0.333333	0.6	0	0.333333	-0.5		-0.333333
																		0	-0.2	0	0.6	0.538462	-0.333333	-0.428571	0.142857	-0.6	-0.333333	0	0	0	0.333333	0.666667	0	0.622641	0.333333	0	-0.833333	-0.333333	0	0	0.846154	-0.2	-0.333333	0.6	0	0.333333	-0.5		-0.333333
																		0	-0.2	0	0.6	0.538462	-0.333333	-0.428571	0.142857	-0.6	-0.333333	0	0	0	0.333333	0.666667	0	0.622641	0.333333	0	-0.833333	-0.333333	0	0	0.846154	-0.2	-0.333333	0.6	0	0.333333	-0.5		-0.333333
																		0	-0.2	0	0.6	0.538462	-0.333333	0	0.142857	-0.6	-0.333333	0.5	0	0	0.333333	0.666667	0	0.622641	0.333333	0	-0.833333	-0.333333	0	0	0.733333	-0.2	-0.333333	0.6	0	0.333333	-0.5		-0.333333
																		0	-0.2	0	0.6	0.538462	-0.333333	0.0909091	0.142857	-0.6	-0.333333	0.5	0	0	0.333333	0.666667	0	0.622641	0.333333	0	-0.833333	-0.333333	0	0	0.733333	-0.2	-0.333333	0.6	0	0.333333	-0.5		-0.333333
																		0	-0.2	0	0.6	0.538462	-0.333333	0.0909091	0.142857	-0.6	-0.333333	0.5	0	0	0.333333	0.666667	0	0.622641	0.333333	0	-0.833333	-0.333333	0	0	0.733333	-0.2	-0.333333	0.6	0	0.333333	-0.5		-0.333333
																		0	-0.2	0	0.6	0.538462	-0.333333	0.0909091	0.142857	-0.6	-0.333333	0.5	0	0	0.333333	0.666667	0	0.62963	0.333333	0	-0.833333	-0.333333	0	0	0.733333	-0.2	-0.333333	0.6	0	0.333333	-0.5		-0.333333
																		0	-0.2	0	0.6	0.538462	-0.333333	0.0909091	0.142857	-0.6	-0.333333	0.5	0	0	0.333333	0.666667	0	0.642857	0.333333	0	-0.833333	-0.5	0	0	0.733333	-0.2	-0.6	0.6	0	0.333333	-0.5		-0.333333
																		0	-0.2	0	0.6	0.538462	-0.333333	0.0909091	0.142857	-0.6	-0.333333	0.5	0	0	0.333333	0.666667	0	0.642857	0.333333	0	-0.833333	-0.5	0	0	0.733333	-0.2	-0.6	0.6	0	-0.2	-0.5		-0.333333
																		0	-0.2	0	0.6	0.538462	-0.333333	0.0909091	0.142857	-0.6	-0.333333	0.5	0	0	0.333333	0.666667	0	0.614035	0.333333	0	-0.833333	-0.5	0	0	0.733333	-0.2	-0.6	0.6	0	-0.2	-0.5		-0.333333
																		0	-0.2	0	0.6	0.538462	-0.333333	0.0909091	0.142857	-0.6	-0.333333	0.5	0	0	0.333333	0.666667	0	0.614035	0.333333	0	-0.833333	-0.5	0	0	0.733333	-0.272727	-0.6	0.6	0	-0.2	-0.5		-0.333333
																		0	-0.2	0	0.6	0.538462	-0.333333	0.0909091	0.142857	-0.6	-0.333333	0.5	0	0	0.333333	0.666667	0	0.614035	0.333333	0	-0.833333	-0.5	0	0	0.733333	-0.272727	-0.6	0.6	0	-0.2	-0.5		-0.333333
																		0	-0.2	0	0.6	0.538462	-0.333333	0.0909091	0.142857	-0.6	-0.333333	0.5	0	0	0.333333	0.666667	0	0.614035	0.333333	0	-0.833333	-0.5	0	0	0.733333	-0.272727	-0.6	0.6	0	-0.2	-0.5		-0.333333
																		0	-0.2	0	0.6	0.538462	-0.333333	0.0909091	0.142857	-0.6	-0.333333	0.5	0	0	0.333333	0.666667	0	0.614035	0.333333	0	-0.833333	-0.5	0	0	0.733333	-0.272727	-0.6	0.6	0	-0.2	-0.5		-0.333333
																		0	-0.2	0	0.6	0.538462	-0.333333	0.0909091	0.142857	-0.6	-0.333333	0.5	0	0	0.333333	0.666667	0	0.614035	0.333333	0	-0.833333	-0.6	0	0	0.733333	-0.272727	-0.6	0.6	0	-0.2	0		-0.333333
																		0	-0.2	0	0.6	0.538462	-0.333333	0.0909091	0.142857	-0.6	-0.333333	0.5	0	0	0.333333	0.666667	0	0.614035	0.333333	0	-0.833333	-0.6	0	0	0.625	-0.272727	-0.6	0.6	0	-0.2	0		-0.333333
																		0	-0.2	0	0.6	0.538462	-0.333333	0.0909091	0.142857	-0.6	-0.333333	0.5	0	0	0.333333	0.666667	0	0.614035	0.333333	0	-0.833333	-0.6	0	0	0.625	-0.272727	-0.6	0.6	0	-0.2	0		-0.333333
																		0	-0.2	0	0.6	0.538462	-0.333333	0.0909091	0.142857	-0.6	-0.333333	0.5	0	0	0.333333	0.666667	0	0.614035	0.333333	0	-0.833333	-0.6	0	0	0.625	-0.272727	-0.6	0.6	0	-0.2	0		-0.333333
																		0	-0.2	0	0.6	0.538462	-0.333333	0.0909091	0.142857	-0.6	-0.333333	0.5	0	0	0.333333	0.666667	0	0.614035	0.333333	0	-0.833333	-0.6	0	0	0.625	-0.272727	-0.6	0.6	0	-0.2	0		-0.333333
																		0	-0.2	0	0.6	0.538462	-0.333333	0.0909091	0.142857	-0.6	-0.333333	0.5	0	0	0.333333	0.666667	0	0.614035	0.333333	0	-0.833333	-0.6	0	0	0.625	-0.272727	-0.6	0.6	0	-0.2	0		-0.333333
																		0	-0.2	0	0.6	0.538462	-0.333333	0.0909091	0.142857	-0.6	-0.333333	0.5	0	0	0.333333	0.666667	0	0.614035	0.333333	0	-0.833333	-0.6	0	0	0.625	-0.384615	-0.6	0.6	0	-0.2	0		-0.333333
																		0	-0.2	0	0.6	0.538462	-0.333333	0.0909091	0.142857	-0.6	-0.333333	0.5	0	0	0.333333	0.666667	0	0.614035	0.333333	0	-0.833333	-0.6	0	0	0.625	-0.384615	-0.6	0.6	0	-0.2	0		-0.333333
																		0	-0.2	0	0.6	0.538462	-0.333333	0.0909091	0.142857	-0.6	-0.333333	0.5	0	0	0.333333	0.666667	0	0.614035	0.333333	0	-0.833333	-0.6	0	0	0.625	-0.384615	-0.6	0.6	0	-0.2	0		-0.333333
																		0	-0.2	0	0.6	0.538462	-0.333333	0.0909091	0.142857	-0.6	-0.333333	0.5	0	0	0.333333	0.666667	0	0.614035	0.333333	0	-0.833333	-0.6	0	0	0.625	-0.384615	-0.6	0.6	0	-0.2	0		-0.333333
																		0	-0.2	0	0.6	0.538462	-0.333333	0.0909091	0.142857	-0.6	-0.333333	0.5	0	0	0.333333	0.666667	0	0.614035	0.333333	0	-0.833333	-0.6	0	0	0.625	-0.428571	-0.6	0.6	0	-0.2	0		-0.333333
																		0	-0.2	0	0.6	0.538462	-0.333333	0.0909091	0.142857	-0.6	-0.333333	0.5	0	0	0.333333	0.666667	0	0.614035	0.333333	0	-0.833333	-0.6	0	0	0.625	-0.428571	-0.6	0.6	0	-0.2	0		-0.333333
																		0	-0.2	0	0.6	0.538462	-0.333333	0.0909091	0.142857	-0.6	-0.333333	0.5	0	0	0.333333	0.666667	0	0.627119	0.333333	0	-0.833333	-0.6	0	0	0.625	-0.428571	-0.6	0.6	0	-0.2	0		-0.333333
																		0	-0.2	0	0.6	0.538462	-0.333333	0.0909091	0.142857	-0.6	-0.333333	0.5	0	0	0.333333	0.666667	0	0.627119	0.333333	0	-0.833333	-0.6	0	0	0.625	-0.428571	-0.6	0.6	0	-0.2	0		-0.333333
																		0	-0.2	0	0.6	0.538462	-0.333333	0.0909091	0.142857	-0.6	-0.333333	0.5	0	0	0.333333	0.666667	0	0.627119	0.333333	0	-0.833333	-0.6	0	0	0.684211	-0.428571	-0.6	0.6	0	-0.2	0		-0.333333
																		0	-0.2	0	0.6	0.538462	-0.333333	0.0909091	0.142857	-0.6	-0.333333	0.5	0	0	0.333333	0.666667	0	0.627119	0.333333	0	-0.833333	-0.6	0	0	0.73913	-0.428571	-0.6	0.6	0	-0.2	0		-0.333333
																		0	-0.2	0	0.6	0.538462	-0.333333	0.0909091	0.142857	-0.6	-0.333333	0.5	0	0	0.333333	0.666667	0	0.627119	0.333333	0	-0.833333	-0.6	0	0	0.73913	-0.428571	-0.6	0.6	0	-0.2	0		-0.333333
																		0	-0.2	0	0.6	0.538462	-0.333333	0.0909091	0.142857	-0.6	-0.333333	0.5	0	0	0.333333	0.666667	0	0.627119	0.333333	0	-0.833333	-0.6	0	0	0.73913	-0.428571	-0.6	0.6	0	-0.2	0		-0.333333
																		0	-0.2	0	0.6	0.538462	-0.333333	0.0909091	0.142857	-0.6	-0.333333	0.5	0	0	0.333333	0.666667	0	0.627119	0.333333	0	-0.833333	-0.6	0	0	0.73913	-0.428571	-0.6	0.6	0	-0.2	0		-0.333333
																		0	-0.2	0	0.6	0.538462	-0.333333	0.0909091	0.142857	-0.6	-0.333333	0.5	0	0	0.333333	0.666667	0	0.627119	0.333333	0	-0.857143	-0.6	0	0	0.73913	-0.428571	-0.6	0.6	0	-0.2	0		-0.333333
																		0	-0.2	0	0.6	0.538462	-0.333333	0.0909091	0.142857	-0.6	-0.333333	0.5	0	0	0.333333	0.666667	0	0.627119	0.333333	0	-0.857143	-0.6	0	0	0.73913	-0.428571	-0.142857	0.6	0	-0.2	0		-0.333333
																		0	-0.2	0	0.6	0.571429	-0.333333	0.0909091	0.142857	-0.6	-0.333333	0.5	0	0	0.333333	0.666667	0	0.627119	0.333333	0	-0.857143	-0.6	0	0	0.73913	-0.428571	0	0.6	0	-0.2	0		-0.333333
																		0	-0.2	0	0.6	0.571429	-0.333333	0.0909091	0.142857	-0.6	-0.333333	0.5	0	0	0.333333	0.666667	0	0.627119	0.333333	0	-0.857143	-0.6	0	0	0.73913	-0.428571	0	0.6	0	-0.2	0		-0.333333
																		0	-0.2	0	0.6	0.571429	-0.333333	0.0909091	0.142857	-0.6	-0.333333	0.5	0	0	0.333333	0.666667	0	0.627119	0.333333	0	-0.857143	-0.6	0	0	0.73913	-0.5	0	0.6	0	-0.2	0		-0.333333
																		0	-0.2	0	0.6	0.571429	-0.333333	0.0909091	0.142857	-0.6	-0.333333	0.5	0	0	0.333333	0.666667	0	0.627119	0.333333	0	-0.857143	-0.6	0	0	0.73913	-0.5	0	0.6	0	-0.2	0		-0.333333
																		0	-0.2	0	0.6	0.571429	-0.333333	0.0909091	0.142857	-0.6	-0.333333	0.5	0	0	0.333333	0.666667	0	0.627119	0.333333	0	-0.857143	-0.6	0	0	0.73913	-0.5	0	0.6	0	-0.2	0		-0.333333
																		0	-0.2	0	0.6	0.571429	-0.333333	0.0909091	0.142857	-0.6	-0.333333	0.5	0	0	0.333333	0.666667	0	0.627119	0.333333	0	-0.625	-0.6	0	0	0.73913	-0.5	0	0.6	0	-0.2	0		-0.333333
																		0	-0.2	0	0.6	0.6	-0.333333	0.0909091	0.142857	-0.6	-0.333333	0.5	0	0	0.333333	0.666667	0	0.627119	0.333333	0	-0.130435	-0.6	0	0	0.73913	-0.5	0	0.6	0	-0.2	0		-0.333333
																		0	-0.2	0	0.6	0.6	-0.333333	0.0909091	0.142857	-0.6	-0.333333	0.5	0	0	0.333333	0.666667	0	0.627119	0.333333	0	0.037037	-0.6	0	0	0.73913	-0.5	0	0.6	0	-0.2	0		-0.333333
																		0	-0.2	0	0.6	0.6	-0.333333	0.0909091	0.142857	-0.6	-0.333333	0.5	0	0	0.333333	0.666667	0	0.627119	0.333333	0	0.037037	-0.6	0	0	0.73913	-0.5	0	0.6	0	-0.2	0		-0.333333
																		0	-0.2	0	0.6	0.6	-0.333333	0.0909091	0.142857	-0.6	-0.333333	0.5	0	0	0.333333	0.666667	0	0.627119	0.333333	0	0.037037	-0.6	0	0	0.73913	-0.5	0	0.6	0	-0.2	0		-0.333333
																		0	-0.2	0	0.6	0.6	-0.333333	0.0909091	0.142857	-0.6	-0.333333	0.5	0	0	0.333333	0.666667	0	0.627119	0.333333	0	0.037037	-0.6	0	0	0.73913	-0.5	0	0.6	0	-0.2	0		-0.333333
																		0	-0.2	0	0.6	0.6	-0.333333	0.0909091	0.142857	-0.6	-0.333333	0.5	0	0	0.333333	0.666667	0	0.627119	0.333333	0	0.037037	-0.6	0	0	0.73913	-0.5	0	0.6	0	-0.2	0		-0.333333
																		0	-0.2	0	0.6	0.6	-0.333333	0.0909091	0.142857	-0.6	-0.333333	0.5	0	0	0.333333	0.666667	0	0.627119	0.333333	0	0.037037	-0.6	0	0	0.73913	-0.5	0	0.6	0	-0.2	0		-0.333333
																		0	-0.2	0	0.6	0.6	-0.333333	0.0909091	0.142857	-0.6	-0.333333	0.5	0	0	0.333333	0.666667	0	0.627119	0.333333	0	0.037037	-0.6	0	0	0.73913	-0.5	0	0.6	0	-0.2	0		-0.333333
																		0	-0.2	0	0.6	0.6	-0.333333	0.0909091	0.142857	-0.6	-0.333333	0.5	0	0	0.333333	0.666667	0	0.627119	0.333333	0	0.037037	-0.6	0	0	0.73913	-0.5	0	0.6	0	-0.2	0		-0.333333
																		0	-0.2	0	0.6	0.6	-0.333333	0.0909091	0.142857	-0.6	-0.333333	0.5	0	0	0.333333	0.666667	0	0.627119	0.333333	0	0.037037	-0.6	0	0	0.73913	-0.5	0	0.6	0	-0.2	0		-0.333333
																		0	-0.2	0	0.6	0.6	-0.333333	0.0909091	0.142857	-0.6	-0.333333	0.5	0	0	0.333333	0.666667	0	0.627119	0.333333	0	0.037037	-0.6	0	0	0.73913	-0.5	0	0.6	0	-0.2	0		-0.333333
																		0	-0.2	0	0.6	0.6	-0.333333	0.0909091	0.142857	-0.6	-0.333333	0.5	0	0	0.333333	0.666667	0	0.6	0.333333	0	0.037037	-0.6	0	0	0.73913	-0.529412	0	0.6	0	-0.2	0		-0.333333
																		0	-0.2	0	0.6	0.6	-0.333333	0.0909091	0.142857	-0.6	-0.333333	0.5	0	0	0.333333	0.666667	0	0.6	0.333333	0	0.037037	-0.6	0	0	0.73913	-0.529412	0	0.6	0	-0.2	0		-0.333333
																		0	-0.2	0	0.6	0.6	-0.333333	0.0909091	0.142857	-0.6	-0.333333	0.5	0	0	0.333333	0.666667	0	0.6	0.333333	0	0.037037	-0.6	0	0	0.73913	-0.529412	0	0.6	0	-0.2	0		-0.333333
																		0	-0.2	0	0.6	0.6	0.2	0.0909091	0.142857	-0.6	-0.333333	0.5	0	0	0.333333	0.666667	0	0.6	0.333333	0	0.037037	-0.6	0	0	0.73913	-0.529412	0	0.6	0	-0.2	0		-0.333333
																		0	-0.2	0	0.6	0.6	0.2	0.230769	0.142857	-0.6	-0.333333	0.5	0	0	0.333333	0.666667	0	0.606557	0.333333	0	0.037037	-0.6	0	0	0.73913	-0.529412	0	0.6	0	-0.2	0		-0.333333
																		0	-0.2	0	0.6	0.625	0.2	0.230769	0.142857	-0.6	-0.333333	0.5	0	0	0.333333	0.666667	0	0.606557	0.333333	0	0.037037	-0.6	0	0	0.73913	-0.529412	0	0.6	0	-0.2	0		-0.333333
																		0	-0.2	0	0.6	0.625	0.2	0.230769	0.142857	-0.6	-0.333333	0.5	0	0	0.333333	0.666667	0	0.606557	0.333333	0	0.037037	-0.6	0	0	0.73913	-0.529412	0	0.6	0	-0.2	0		-0.333333
																		0	-0.2	0	0.6	0.625	0.2	0.230769	0.142857	-0.6	-0.333333	0.5	0	0	0.333333	0.666667	0	0.606557	0.333333	0	0.037037	-0.6	0	0	0.73913	-0.529412	0	0.6	0	-0.2	0		-0.333333
																		0	-0.2	0	0.6	0.625	0.2	0.230769	0.142857	-0.6	-0.333333	0.5	0	0	0.333333	0.666667	0	0.606557	0.333333	0	0.037037	-0.6	0	0	0.73913	-0.529412	0	0.6	0	-0.2	0		-0.333333
																		0	-0.2	0	0.6	0.625	0.2	0.230769	0.142857	-0.6	-0.333333	0.5	0	0	0.333333	0.666667	0	0.606557	0.333333	0	0.037037	-0.6	0	0	0.73913	-0.529412	0	0.6	0	-0.2	0		-0.333333
																		0	-0.2	0	0.6	0.625	0.2	0.230769	0.142857	-0.6	-0.333333	0.5	0	0	0.333333	0.666667	0	0.612903	0.333333	0	0.037037	-0.6	0	0	0.73913	-0.529412	0	0.6	0	-0.2	0		-0.333333
																		0	-0.2	0	0.6	0.625	0.2	0.230769	0.142857	-0.6	-0.333333	0.5	0	0	0.333333	0.666667	0	0.612903	0.333333	0	0.037037	-0.6	0	0	0.73913	-0.529412	0	0.6	0	-0.2	0		-0.333333
																		0	-0.2	0	0.6	0.625	0.2	0.230769	0.142857	-0.6	-0.333333	0.5	0	0	0.333333	0.666667	0	0.612903	0.333333	0	0.037037	-0.6	0	0	0.73913	-0.529412	0	0.6	0	-0.2	0		-0.333333
																		0	-0.2	0	0.6	0.625	0.2	0.230769	0.142857	-0.6	-0.333333	0.5	0	0	0.333333	0.666667	0	0.612903	0.333333	0	0.037037	-0.6	0	0	0.73913	-0.529412	0	0.6	0	-0.2	0		-0.333333
																		0	-0.2	0	0.6	0.625	0.2	0.230769	0.142857	-0.6	-0.333333	0.5	0	0	0.333333	0.666667	0	0.612903	0.333333	0	0.037037	-0.6	0	0	0.73913	-0.529412	0	0.6	0	-0.2	0		-0.333333
																		0	-0.2	0	0.6	0.625	0.2	0.230769	0.142857	-0.6	-0.333333	0.5	0	0	0.333333	0.666667	0	0.612903	0.333333	0	0.037037	-0.6	0	0	0.73913	-0.529412	0	0.6	0	-0.2	0		-0.333333
																		0	-0.2	0	0.6	0.625	0.2	0.230769	0.142857	-0.6	-0.333333	0.666667	0	0	0.333333	0.666667	0	0.587302	0.333333	0	0.037037	-0.6	0	0	0.73913	-0.529412	0	0.6	0	-0.2	0		-0.333333
																		0	-0.2	0	0.6	0.625	0.2	0.230769	0.142857	-0.6	-0.333333	0.777778	0	0	0.333333	0.666667	0	0.587302	0.333333	0	0.037037	-0.6	0	0	0.73913	-0.529412	0	0.6	0	-0.2	0		-0.333333
																		0	-0.2	0	0.6	0.625	0.2	0.230769	0.142857	-0.6	-0.333333	0.875	0	0	0.333333	0.666667	0	0.587302	0.5	0	0.037037	-0.6	0	0	0.73913	-0.529412	0	0.6	0	-0.2	0		-0.333333
																		0	-0.2	0	0.6	0.625	0.2	0.230769	0.142857	-0.6	-0.333333	0.875	0	0	0.333333	0.666667	0	0.59375	0.5	0	0.037037	-0.6	0	0	0.73913	-0.529412	0	0.6	0	-0.2	0		-0.333333
																		0	-0.2	0	0.6	0.625	0.2	0.230769	0.142857	-0.6	-0.333333	0.875	0	0	0.333333	0.666667	0	0.59375	0.5	0	0.037037	-0.6	0	0	0.73913	-0.529412	0	0.6	0	-0.2	0		-0.333333
																		0	-0.2	0	0.6	0.625	0.2	0.230769	0.142857	-0.6	-0.333333	0.875	0	0	0.333333	0.666667	0	0.59375	0.5	0	0.037037	-0.6	0	0	0.73913	-0.529412	0	0.6	0	-0.2	0		-0.333333
																		0	-0.2	0	0.6	0.625	0.2	0.230769	0.142857	-0.6	-0.333333	0.875	0	0	0.333333	0.666667	0	0.569231	0.5	0	0.037037	-0.6	0	0	0.73913	-0.529412	0	0.6	0	-0.2	0		-0.333333
																		0	-0.2	0	0.6	0.625	0.2	0.230769	0.142857	-0.6	-0.333333	0.875	0	0	0.333333	0.666667	0	0.545455	0.5	0	0.037037	-0.6	0	0	0.73913	-0.529412	0	0.6	0	-0.2	0		-0.333333
																		0	-0.2	0	0.6	0.625	0.2	0.230769	0.142857	-0.6	-0.333333	0.875	0	0	0.333333	0.666667	0	0.545455	0.5	0	0.037037	-0.6	0	0	0.73913	-0.529412	0	0.6	0	-0.2	0		-0.333333
																		0	-0.2	0	0.6	0.625	0.2	0.230769	0.142857	-0.6	-0.333333	0.875	0	0	0.333333	0	0	0.552239	0.5	0	0.037037	-0.6	0	0	0.73913	-0.555556	0	0.6	0	-0.2	0		-0.333333
																		0	-0.2	0	0.6	0.625	0.2	0.230769	0.142857	-0.6	-0.333333	0.875	0	0	0.333333	0	0	0.552239	0.5	0	0.037037	-0.6	0	0	0.73913	-0.555556	0	0.6	0	-0.2	0		-0.333333
																		0	-0.2	0	0.6	0.625	0.2	0.230769	0.142857	-0.6	-0.333333	0.875	0	0	0.333333	0	0	0.552239	0.5	0	0.0714286	-0.6	0	0	0.73913	-0.555556	0	0.6	0	-0.2	0		0
																		0	-0.2	0	0.6	0.625	0.2	0.230769	0.142857	-0.6	-0.333333	0.875	0	0	0.333333	0	0	0.552239	0.5	0	0.0714286	-0.666667	0	0	0.73913	-0.555556	0	0.6	0	-0.2	0		0
																		0	-0.2	0	0.6	0.625	0.2	0.230769	0.142857	-0.6	-0.333333	0.875	0	0	0.333333	0	0	0.552239	0.5	0	0.0714286	-0.666667	0	0	0.73913	-0.555556	0	0.6	0	-0.2	0		0
																		0	-0.2	0	0.6	0.625	0.2	0.230769	0.142857	-0.6	-0.333333	0.875	0	0	0.333333	0	0	0.552239	0.5	0	0.0714286	-0.666667	0	0	0.73913	-0.555556	0	0.6	0	-0.2	0		0
																		0	-0.2	0	0.6	0.625	0.2	0.230769	0.142857	-0.6	-0.333333	0.875	0	0	0.333333	0	0	0.552239	0.5	0	0.0714286	-0.666667	0	0	0.73913	-0.555556	0	0.6	0	-0.2	0		0
																		0	-0.2	0	0.6	0.625	0.333333	0.230769	0.142857	-0.6	-0.333333	0.875	0	0	0.333333	0	0	0.552239	0.5	0	0.0714286	-0.666667	0	0	0.73913	-0.578947	0	0.6	0	-0.2	0		0
																		0	-0.2	0	0.6	0.625	0.333333	0.230769	0.142857	-0.6	-0.333333	0.875	0	0	0.333333	0	0	0.552239	0.5	0	0.0714286	-0.666667	0	0	0.73913	-0.578947	0	0.6	0	-0.2	0		0
																		0	-0.2	0	0.6	0.666667	0.333333	0.230769	0.142857	-0.6	-0.333333	0.875	0	0	0.333333	0	0	0.552239	0.5	0	0.0714286	-0.666667	0	0	0.73913	-0.578947	0	0.6	0	-0.2	0		0
																		0	-0.2	0	0.6	0.684211	0.333333	0.230769	0.142857	-0.6	-0.333333	0.875	0	0	0.333333	0	0	0.552239	0.5	0	0.0714286	-0.666667	0	0	0.73913	-0.578947	0	0.6	0	-0.2	0		0
																		0	-0.2	0	0.6	0.714286	0.333333	0.230769	0.142857	-0.6	-0.333333	0.875	0	0	0.333333	0	0	0.552239	0.5	0	0.0714286	-0.666667	0	0	0.73913	-0.578947	0	0.6	0	-0.2	0		0
																		0	-0.2	0	0.6	0.714286	0.333333	0.230769	0.142857	-0.6	-0.333333	0.875	0	0	0.333333	0	0	0.552239	0.5	0	0.0714286	-0.666667	0	0	0.73913	-0.578947	0	0.6	0	-0.2	0		0
																		0	-0.2	0	0.6	0.714286	0.333333	0.230769	0.142857	-0.6	-0.333333	0.875	0	0	0.333333	0	0	0.552239	0.5	0	0.0714286	-0.666667	0	0	0.73913	-0.578947	0	0.6	0	-0.2	0		0
																		0	-0.2	0	0.6	0.714286	0.333333	0.230769	0.142857	-0.6	-0.333333	0.875	0	0	0.333333	0	0	0.552239	0.5	0	0.0714286	-0.666667	0	0	0.73913	-0.578947	0	0.6	0	-0.2	0		0
																		0	-0.2	0	0.6	0.727273	0.333333	0.230769	0.142857	-0.6	-0.333333	0.875	0	0	0.333333	0	0	0.552239	0.5	0	0.0714286	-0.666667	0	0	0.73913	-0.578947	0	0.6	0	-0.2	0.142857		0
																		0	-0.2	0	0.6	0.727273	0.333333	0.230769	0.142857	-0.6	-0.333333	0.875	0	0	0.333333	0	0	0.552239	0.5	0	0.0714286	-0.666667	0	0	0.73913	-0.578947	0	0.6	0	-0.2	0.142857		0
																		0	-0.2	0	0.6	0.727273	0.333333	0.230769	0.142857	-0.6	-0.333333	0.875	0	0	0.333333	0	0	0.552239	0.5	0	0.0714286	-0.666667	0	0	0.73913	-0.6	0	0.6	0	-0.2	0.142857		0
																		0	-0.2	0	0.6	0.727273	0.333333	0.230769	0.142857	-0.6	-0.333333	0.875	0	0	0.333333	0	0	0.552239	0.5	0	0.0714286	-0.666667	0	0	0.73913	-0.6	0	0.6	0	-0.2	0.142857		0
																		0	-0.2	0	0.6	0.727273	0.333333	0.230769	0.142857	-0.6	-0.333333	0.875	0	0	0.333333	0	0	0.552239	0.5	0	0.0714286	-0.666667	0	0	0.73913	-0.6	0	0.6	0	-0.2	0.142857		0
																		0	-0.2	0	0.6	0.727273	0.333333	0.230769	0.142857	-0.6	-0.333333	0.875	0	0	0.333333	0	0	0.552239	0.5	0	0.0714286	-0.666667	0	0	0.73913	-0.6	0	0.6	0	-0.2	0.142857		0
																		0	-0.2	0	0.6	0.727273	0.333333	0.230769	0.142857	-0.6	-0.333333	0.875	0	0	0.333333	0	0	0.552239	0.5	0	0.0714286	-0.666667	0	0	0.73913	-0.6	0	0.6	0	-0.2	0.142857		0
																		0	-0.2	0	0.6	0.727273	0.333333	0.230769	0.142857	-0.6	-0.333333	0.875	0	0	0.333333	0	0	0.552239	0.5	0	0.0714286	-0.666667	0	0	0.73913	-0.6	0	0.6	0	-0.2	0.142857		0
																		0	-0.2	0	0.6	0.727273	0.333333	0.230769	0.142857	-0.6	-0.333333	0.875	0	0	0.333333	0	0	0.552239	0.5	0	0.0714286	-0.666667	0	0	0.73913	-0.6	0	0.6	0	-0.2	0.142857		0
																		0	-0.2	0	0.6	0.727273	0.333333	0.230769	0.142857	-0.6	-0.333333	0.875	0	0	0.333333	0	0	0.552239	0.5	0	0.0714286	-0.666667	0	0	0.73913	-0.6	0	0.6	0	-0.2	0.142857		0
																		0	-0.2	0	0.6	0.727273	0.333333	0.230769	0.142857	-0.666667	-0.333333	0.875	0	0	0.333333	0	0	0.552239	0.5	0	0.0714286	-0.666667	0	0	0.73913	-0.6	0	0.6	0	-0.2	0.142857		0
																		0	-0.2	0	0.6	0.727273	0.333333	0.230769	0.142857	-0.666667	-0.333333	0.875	0	0	0.333333	0	0	0.565217	0.5	0	0.0714286	-0.666667	0	0	0.73913	-0.6	0	0.6	0	-0.2	0.142857		0
																		0	-0.2	0	0.6	0.727273	0.333333	0.230769	0.142857	-0.666667	-0.333333	0.875	0	0	0.333333	0	0	0.565217	0.5	0	0.0714286	-0.666667	0	0	0.73913	-0.6	0	0.6	0	-0.2	0.142857		0
																		0	-0.2	0	0.6	0.727273	0.333333	0.230769	0.142857	-0.666667	-0.333333	0.875	0	0	0.333333	0	0	0.565217	0.5	0	0.0714286	-0.666667	0	0	0.73913	-0.6	0	0.6	0	-0.2	0.142857		0
																		0	-0.2	0	0.6	0.727273	0.333333	0.230769	0.142857	-0.666667	-0.333333	0.875	0	0	0.333333	0	0	0.565217	0.5	0	0.0714286	-0.666667	0	0	0.73913	-0.6	0	0.6	0	-0.2	0.142857		0
																		0	-0.2	0	0.6	0.73913	0.333333	0.230769	0.142857	-0.666667	-0.333333	0.875	0	0	0.333333	0	0	0.565217	0.5	0	0.0714286	-0.666667	0	0	0.73913	-0.6	0	0.6	0	-0.2	0.142857		0
																		0	-0.2	0	0.6	0.73913	0.333333	0.230769	0.142857	-0.666667	-0.333333	0.875	0	0	0.333333	0	0	0.565217	0.5	0	0.0714286	-0.666667	0	0	0.73913	-0.6	0	0.6	0	-0.2	0.142857		0
																		0	-0.2	0	0.6	0.73913	0.333333	0.230769	0.142857	-0.666667	-0.333333	0.875	0	0	0.333333	0	0	0.565217	0.5	0	0.0714286	-0.666667	0	0	0.73913	-0.6	0	0.6	0	-0.2	0.142857		0
																		0	-0.2	0	0.6	0.73913	0.333333	0.230769	0.142857	-0.666667	-0.333333	0.875	0	0	0.333333	0	0	0.565217	0.5	0	0.0714286	-0.666667	0	0	0.73913	-0.6	0	0.6	0	-0.2	0.142857		0
																		0	-0.2	0	0.666667	0.73913	0.333333	0.230769	0.142857	-0.666667	-0.333333	0.875	0	0	0.333333	0	0	0.565217	0.666667	0	0.0714286	-0.666667	0	0	0.73913	-0.6	0	0.6	0	-0.2	0.142857		0
																		0	-0.2	0	0.666667	0.769231	0.333333	0.230769	0.142857	-0.666667	-0.333333	0.875	0	0	0.333333	0	0	0.565217	0.666667	0	0.0714286	-0.714286	0	0	0.73913	-0.6	0	0.6	0	-0.2	0.142857		0
																		0	-0.2	0	0.666667	0.769231	0.333333	0.230769	0.142857	-0.666667	-0.333333	0.875	0	0	0.333333	0	0	0.565217	0.666667	0	0.0714286	-0.714286	0	0	0.73913	-0.6	0	0.6	0	-0.2	0.142857		0
																		0	-0.2	0	0.666667	0.769231	0.333333	0.230769	0.142857	-0.666667	-0.333333	0.875	0	0	0.333333	0	0	0.565217	0.666667	0	0.0714286	-0.714286	0	0	0.73913	-0.6	0	0.6	0	-0.2	0.142857		0
																		0	-0.2	0	0.666667	0.769231	0.333333	0.230769	0.142857	-0.666667	-0.333333	0.875	0	0	0.333333	0	0	0.565217	0.666667	0	0.0714286	-0.714286	0	0	0.73913	-0.6	0	0.6	0	-0.2	0.142857		0
																		0	0.333333	0	0.666667	0.769231	0.428571	0.230769	0.142857	-0.666667	-0.333333	0.875	0	0	0.333333	-0.166667	0	0.565217	0.666667	0	0.0714286	-0.714286	0	0	0.73913	-0.6	0	0.6	0	-0.2	0.142857		0
																		0	0.4	0	0.666667	0.769231	0.428571	0.230769	0.142857	-0.666667	-0.333333	0.875	0	0	0.333333	-0.166667	0	0.565217	0.666667	0	0.0714286	-0.714286	0	0	0.73913	-0.6	0	0.6	0	-0.2	0.142857		0
																		0	0.4	0	0.666667	0.785714	0.428571	0.230769	0.142857	-0.666667	-0.333333	0.875	0	0	0.333333	-0.166667	0	0.565217	0.666667	0	0.0714286	-0.714286	0	0	0.73913	-0.6	0	0.6	0	-0.2	0.142857		0
																		0	0.454545	0	0.714286	0.785714	0.428571	0.230769	0.142857	-0.666667	-0.333333	0.875	0	0	0.333333	-0.166667	0	0.565217	0.666667	0	0.0714286	-0.714286	0	0	0.73913	-0.6	0	0.6	0	-0.2	0.142857		0
																		0	0.5	0	0.714286	0.785714	0.428571	0.230769	0.142857	-0.666667	-0.333333	0.875	0	0	0.333333	-0.166667	0	0.565217	0.666667	0	0.0714286	-0.0909091	0	0	0.73913	-0.6	0	0.6	0	-0.2	0.142857		0
																		0	0.625	0	0.714286	0.785714	0.428571	0.444445	0.142857	-0.666667	-0.333333	0.875	0	0	0.333333	-0.166667	0	0.565217	0.666667	0	0.0714286	-0.0909091	0	0	0.73913	-0.6	0	0.6	0	-0.2	0.142857		0
																		0	0.625	0	0.714286	0.785714	0.428571	0.583333	0.142857	-0.666667	-0.333333	0.875	0	0	0.333333	-0.166667	0	0.565217	0.666667	0	0.0714286	-0.0909091	0	0	0.73913	-0.6	0	0.6	0	-0.2	0.142857		0
																		0	0.666667	0	0.714286	0.785714	0.428571	0.615385	0.142857	-0.666667	-0.333333	0.875	0	0	0.333333	-0.166667	0	0.565217	0.666667	0	0.0714286	-0.0909091	0	0	0.73913	-0.6	0	0.6	0	-0.2	0.142857		0
																		0	0.684211	0	0.714286	0.785714	0.428571	0.615385	0.142857	-0.666667	-0.333333	0.875	0	0	0.333333	-0.166667	0	0.565217	0.666667	0	0.0714286	-0.0909091	0	0	0.73913	-0.6	-0.333333	0.6	0	-0.2	0.142857		0
																		0	0.7	0	0.714286	0.785714	0.428571	0.62963	0.142857	-0.666667	-0.333333	0.875	0	0	0.333333	-0.166667	0	0.565217	0.666667	0	0.0714286	-0.0909091	0	0	0.73913	-0.6	-0.333333	0.6	0	-0.2	0.142857		0
																		0	0.73913	0	0.777778	0.785714	0.428571	0.62963	0.142857	-0.666667	-0.333333	0.875	0	0	0.333333	-0.166667	0	0.565217	0.666667	0	0.0714286	-0.0909091	0	0	0.73913	-0.6	-0.333333	0.6	0	-0.2	0.142857		0
																		0	0.76	0	0.777778	0.785714	0.428571	0.62963	0.142857	-0.666667	-0.333333	0.875	0	0	0.333333	-0.166667	0	0.565217	0.666667	0	0.0714286	-0.0909091	0	0	0.73913	-0.6	-0.333333	0.6	0	-0.2	0.142857		0
																		0	0.777778	0	0.777778	0.785714	0.428571	0.62963	0.142857	-0.666667	-0.333333	0.875	0	0	0.333333	-0.166667	0	0.565217	0.666667	0	0.0714286	-0.0909091	0	0	0.73913	-0.6	-0.333333	0.6	0	-0.2	0.142857		0
																		0	0.777778	0	0.777778	0.785714	0.428571	0.62963	0.142857	-0.666667	-0.333333	0.875	0	0	0.333333	-0.166667	0	0.565217	0.666667	0	0.0714286	-0.0909091	0	0	0.73913	-0.6	-0.333333	0.6	0	-0.2	0.142857		0
																		0	0.785714	0	0.8	0.785714	0.428571	0.642857	0.142857	-0.666667	-0.333333	0.875	0	0	0.333333	-0.166667	0	0.571429	0.666667	0	0.0714286	-0.0909091	0	0	0.73913	-0.6	-0.333333	0.6	0	-0.2	0.142857		0
																		0	0.785714	0	0.8	0.785714	0.428571	0.642857	0.142857	-0.666667	-0.333333	0.875	0	0	0.333333	-0.166667	0	0.571429	0.666667	0	0.0714286	-0.0909091	0	0	0.73913	-0.6	-0.333333	0.6	0	-0.2	0.142857		0
																		0	0.785714	0	0.8	0.785714	0.428571	0.642857	0.142857	-0.666667	-0.333333	0.875	0	0	0.333333	-0.166667	0	0.571429	0.666667	0	0.0344828	-0.0909091	0	0	0.73913	-0.6	-0.333333	0.6	0.333333	-0.2	0.142857		0
																		0	0.785714	0	0.833333	0.785714	0.428571	0.642857	0.142857	-0.666667	-0.333333	0.875	0	0	0.333333	-0.166667	0	0.571429	0.666667	0	0.0344828	-0.0909091	0	0	0.73913	-0.6	-0.333333	0.6	0.75	-0.2	0.142857		0
																		0	0.785714	0	0.833333	0.785714	0.428571	0.642857	0.142857	-0.666667	-0.333333	0.875	0	0	0.333333	-0.166667	0	0.571429	0.666667	0	0.0344828	-0.0909091	0	0	0.73913	-0.6	-0.333333	0.6	0.833333	-0.2	0.142857		0
																		0	0.785714	0	0.833333	0.785714	0.428571	0.642857	0.142857	-0.666667	-0.333333	0.875	0	0	0.5	-0.166667	0	0.571429	0.666667	0	0.0344828	-0.0909091	0	0	0.73913	-0.6	-0.333333	0.6	0.904762	-0.2	0.142857		0
																		0	0.785714	0	0.833333	0.785714	0.428571	0.642857	0.142857	-0.666667	-0.333333	0.875	0	0	0.5	-0.166667	0	0.571429	0.666667	0	0.0344828	-0.0909091	0	0	0.73913	-0.6	-0.333333	0.6	0.923077	-0.2	0.142857		0
																		0	0.785714	0	0.833333	0.785714	0.428571	0.642857	0.142857	-0.666667	-0.333333	0.875	0	0	0.5	-0.166667	0	0.549296	0.666667	0	0.0344828	-0.0909091	0	0	0.73913	-0.6	-0.333333	0.6	0.925926	-0.2	0.142857		0
																		0	0.785714	0	0.833333	0.785714	0.428571	0.642857	0.142857	-0.666667	-0.333333	0.875	0	0	0.5	-0.166667	0	0.549296	0.666667	0	0.0967742	-0.0909091	0	0	0.73913	-0.6	-0.333333	0.6	0.925926	-0.2	0.142857		0
																		0	0.785714	0	0.833333	0.785714	0.428571	0.533333	0.142857	-0.666667	-0.333333	0.875	0	0	0.5	-0.166667	0	0.549296	0.666667	0	0.0967742	-0.0909091	0	0	0.73913	-0.6	-0.333333	0.6	0.925926	-0.2	0.142857		0
																		0	0.785714	0	0.833333	0.785714	0.428571	0.533333	0.142857	-0.666667	-0.333333	0.875	0	0	0.5	-0.166667	0	0.549296	0.666667	0	0.0967742	-0.0909091	0	0	0.73913	-0.6	-0.333333	0.6	0.925926	-0.2	0.142857		0
																		0	0.785714	0	0.857143	0.785714	0.428571	0.533333	0.142857	-0.666667	-0.333333	0.875	0	0	0.5	-0.230769	0	0.549296	0.666667	0	0.0967742	-0.0909091	0	0	0.73913	-0.652174	-0.333333	0.6	0.925926	-0.2	0.142857		0
																		0	0.785714	0	0.857143	0.785714	0.428571	0.533333	0.142857	-0.666667	-0.333333	0.875	0	0	0.5	-0.230769	0	0.549296	0.666667	0	0.0967742	-0.0909091	0	0	0.73913	-0.666667	-0.333333	0.6	0.925926	-0.2	0.142857		0
																		0	0.785714	0	0.875	0.785714	0.428571	0.533333	0.142857	-0.666667	-0.333333	0.875	0	0	0.5	-0.230769	0	0.549296	0.666667	0	0.0967742	-0.0909091	0	0	0.73913	-0.666667	-0.333333	0.6	0.925926	-0.2	0.142857		0
																		0	0.785714	0	0.875	0.785714	0.428571	0.533333	-0.111111	-0.666667	-0.333333	0.875	0	0	0.5	-0.230769	0	0.549296	0.666667	0	0.0967742	-0.0909091	0	0	0.73913	-0.666667	-0.333333	0.6	0.925926	-0.2	0.142857		0
																		0	0.785714	0	0.875	0.785714	0.428571	0.533333	-0.111111	-0.666667	-0.333333	0.875	0	0	0.5	-0.230769	0	0.549296	0.666667	0	0.0967742	-0.0909091	0	0	0.73913	-0.666667	-0.333333	0.6	0.925926	-0.2	0.142857		0
																		0	0.785714	0	0.875	0.785714	0.428571	0.533333	-0.111111	-0.666667	-0.333333	0.875	0	0	0.5	-0.230769	0	0.549296	0.666667	0	0.0967742	-0.0909091	0	0	0.73913	-0.666667	-0.333333	0.6	0.925926	-0.2	0.142857		0
																		0	0.785714	0	0.875	0.785714	0.428571	0.533333	-0.111111	-0.666667	-0.333333	0.875	0	0	0.5	-0.230769	0	0.549296	0.666667	0	0.0967742	-0.0909091	0	0	0.73913	-0.666667	-0.333333	0.6	0.925926	-0.2	0.142857		0
																		0	0.785714	0	0.875	0.785714	0.428571	0.533333	-0.111111	-0.666667	-0.333333	0.875	0	0	0.5	-0.285714	0	0.549296	0.666667	0	0.0967742	-0.0909091	0	0	0.73913	-0.666667	-0.333333	0.6	0.925926	-0.2	0.142857		0
																		0	0.785714	0	0.894737	0.785714	0.428571	0.533333	-0.111111	-0.666667	-0.333333	0.875	0	0	0.5	-0.285714	0	0.549296	0.666667	0	0.0967742	-0.0909091	0	0	0.73913	-0.666667	-0.333333	0.6	0.925926	-0.2	0.142857		0
																		0	0.785714	0	0.894737	0.785714	0.428571	0.533333	-0.111111	-0.666667	-0.333333	0.875	0	0	0.5	-0.285714	0	0.549296	0.666667	0	0.0967742	-0.0909091	0	0	0.73913	-0.666667	-0.333333	0.6	0.925926	-0.2	0.142857		0
																		0	0.785714	0	0.9	0.785714	0.428571	0.533333	-0.111111	-0.666667	-0.333333	0.875	0	0	0.5	-0.285714	0	0.549296	0.666667	0	0.0967742	-0.166667	0	0	0.73913	-0.666667	-0.333333	0.6	0.925926	-0.333333	0.142857		0
																		0	0.785714	0	0.9	0.785714	0.428571	0.533333	-0.111111	-0.666667	-0.333333	0.875	0	0	0.5	-0.285714	0	0.549296	0.666667	0	0.0967742	-0.166667	0	0	0.73913	-0.666667	-0.333333	0.6	0.925926	-0.142857	0.142857		0
																		0	0.785714	0	0.9	0.785714	0.428571	0.533333	-0.111111	-0.666667	-0.333333	0.875	0	0	0.5	-0.285714	0	0.549296	0.666667	0	0.0967742	-0.166667	0	0	0.73913	-0.666667	-0.333333	0.6	0.925926	-0.142857	0.142857		0
																		0	0.785714	0	0.909091	0.785714	0.428571	0.533333	-0.111111	-0.666667	-0.333333	0.875	0	0	0.5	-0.285714	0	0.549296	0.666667	0	0.0967742	-0.166667	0	0	0.73913	-0.666667	-0.333333	0.6	0.925926	-0.142857	0.142857		0
																		0	0.785714	0	0.909091	0.785714	0.428571	0.533333	-0.111111	-0.666667	-0.333333	0.875	0	0	0.5	-0.285714	0	0.549296	0.666667	0	0.0967742	-0.166667	0	0	0.73913	-0.666667	-0.333333	0.6	0.925926	-0.142857	0.142857		0
																		0	0.666667	0.5	0.913044	0.785714	0.428571	0.533333	-0.111111	-0.666667	-0.333333	0.875	0	0.6	0.5	-0.285714	0	0.549296	0.666667	0	0.0967742	-0.166667	0	0	0.73913	-0.666667	-0.333333	0.6	0.925926	-0.142857	0.142857		0
																		0	0.666667	0.833333	0.916667	0.785714	0.428571	0.533333	-0.111111	-0.666667	-0.333333	0.875	0	0.714286	0.5	-0.285714	0	0.549296	0.666667	0	0.0967742	-0.166667	0	0	0.73913	-0.666667	-0.333333	0.6	0.925926	-0.142857	0.142857		0
																		0	0.666667	0.882353	0.916667	0.785714	0.428571	0.533333	-0.111111	-0.666667	-0.333333	0.875	0	0.818182	0.5	-0.285714	0	0.549296	0.666667	0	0.0967742	-0.166667	0	0	0.73913	-0.666667	-0.333333	0.6	0.925926	-0.142857	0.142857		0
																		0	0.666667	0.913044	0.92	0.785714	0.428571	0.533333	-0.111111	-0.666667	-0.333333	0.875	0	0.818182	0.5	-0.285714	0	0.549296	0.666667	0	0.0967742	-0.166667	0	0	0.73913	-0.666667	-0.333333	0.6	0.925926	-0.142857	0.142857		0
																		0	0.666667	0.913044	0.923077	0.785714	0.428571	0.533333	-0.111111	-0.666667	-0.333333	0.875	0	0.833333	0.5	-0.285714	0	0.549296	0.666667	0	0.0967742	-0.166667	0	0	0.73913	-0.666667	-0.333333	0.6	0.925926	-0.142857	0.142857		0
																		0	0.666667	0.916667	0.923077	0.785714	0.428571	0.533333	-0.111111	-0.666667	-0.333333	0.875	0.333333	0.833333	0.5	-0.285714	0	0.549296	0.666667	0	0.0967742	-0.166667	0	0	0.73913	-0.666667	-0.333333	0.6	0.925926	-0.142857	0.142857		0
																		0	0.666667	0.916667	0.925926	0.785714	0.428571	0.533333	-0.111111	-0.666667	-0.333333	0.875	0.333333	0.833333	0.5	-0.285714	0	0.549296	0.666667	0	0.0967742	-0.166667	0	0	0.73913	-0.666667	-0.333333	0.6	0.925926	-0.142857	0.142857		0
																		0	0.666667	0.916667	0.925926	0.785714	0.428571	0.533333	-0.111111	-0.666667	-0.333333	0.875	0.333333	0.833333	0.6	-0.285714	0	0.549296	0.666667	0	0.0967742	-0.166667	0	0	0.73913	-0.666667	-0.333333	0.6	0.925926	-0.142857	0.142857		0
																		0	0.666667	0.916667	0.925926	0.785714	0.428571	0.533333	-0.111111	-0.666667	-0.333333	0.875	0.333333	0.833333	0.6	-0.285714	0	0.549296	0.666667	0	0.0967742	-0.166667	0	0	0.73913	-0.666667	-0.333333	0.6	0.925926	-0.142857	0.142857		0
																		0	0.666667	0.916667	0.925926	0.785714	0.428571	0.533333	-0.272727	-0.666667	-0.333333	0.875	0.333333	0.833333	0.6	-0.285714	0	0.549296	0.666667	0	0.0967742	-0.166667	0	0	0.73913	-0.666667	-0.333333	0.6	0.925926	-0.142857	0.142857		0
																		0	0.666667	0.916667	0.933333	0.785714	0.428571	0.533333	-0.272727	-0.666667	-0.333333	0.875	0.333333	0.833333	0.6	-0.285714	0	0.549296	0.666667	0	0.0967742	-0.166667	0	0	0.73913	-0.666667	-0.333333	0.6	0.925926	-0.142857	0.142857		0
																		0	0.666667	0.916667	0.9375	0.785714	0.428571	0.533333	-0.272727	-0.666667	-0.333333	0.875	0.333333	0.833333	0.6	-0.285714	0	0.549296	0.666667	0	0.0967742	-0.166667	0	0	0.73913	-0.68	-0.333333	0.6	0.925926	-0.142857	0.142857		0
																		0	0.666667	0.916667	0.9375	0.785714	0.428571	0.533333	-0.272727	-0.666667	-0.333333	0.875	0.333333	0.833333	0.6	-0.285714	0	0.549296	0.666667	0	0.0967742	-0.166667	0	0	0.73913	-0.68	-0.333333	0.6	0.925926	-0.142857	0.142857		0
																		0	0.666667	0.916667	0.9375	0.785714	0.428571	0.533333	-0.272727	-0.666667	-0.333333	0.875	0.333333	0.833333	0.6	-0.285714	0	0.549296	0.666667	0	0.0967742	-0.230769	0	0	0.73913	-0.68	-0.333333	0.6	0.925926	-0.142857	0.142857		0
																		0	0.666667	0.916667	0.941176	0.785714	0.428571	0.533333	-0.272727	-0.666667	-0.333333	0.875	0.333333	0.833333	0.6	-0.285714	0	0.549296	0.666667	0	0.0967742	-0.230769	0	0	0.73913	-0.68	-0.333333	0.6	0.925926	-0.142857	0.142857		0
																		0	0.666667	0.916667	0.944444	0.785714	0.428571	0.533333	-0.272727	-0.666667	-0.333333	0.875	0.333333	0.833333	0.6	-0.285714	0	0.549296	0.666667	0	0.0967742	-0.230769	0	0	0.73913	-0.68	-0.333333	0.6	0.925926	-0.142857	0.142857		0
																		0	0.666667	0.916667	0.951219	0.785714	0.428571	0.533333	-0.272727	-0.666667	-0.333333	0.875	0.333333	0.833333	0.6	-0.285714	0	0.549296	0.666667	0	0.0967742	-0.230769	0	0	0.777778	-0.68	-0.333333	0.6	0.925926	-0.142857	0.142857		0
																		0	0.666667	0.916667	0.953488	0.785714	0.428571	0.533333	-0.272727	-0.666667	-0.333333	0.875	0.333333	0.833333	0.6	-0.285714	0	0.549296	0.666667	0	0.0967742	-0.230769	0	0	0.785714	-0.68	-0.333333	0.6	0.925926	-0.142857	0.142857		0
																		0	0.666667	0.916667	0.956522	0.785714	0.428571	0.533333	-0.272727	-0.666667	-0.333333	0.875	0.333333	0.833333	0.6	-0.285714	0	0.549296	0.666667	0	0.0967742	-0.230769	0	0	0.785714	-0.68	-0.333333	0.6	0.925926	-0.142857	0.142857		0
																		0	0.666667	0.916667	0.958333	0.785714	0.428571	0.533333	-0.272727	-0.75	-0.333333	0.875	0.333333	0.833333	0.6	-0.285714	0	0.549296	0.666667	0	0.0967742	-0.230769	0	0	0.793103	-0.68	-0.333333	0.6	0.925926	-0.142857	0.142857		0
																		0	0.666667	0.916667	0.960784	0.785714	0.428571	0.533333	-0.272727	-0.777778	-0.333333	0.875	0.333333	0.833333	0.6	-0.285714	0	0.549296	0.666667	0	0.0967742	-0.230769	0	0	0.793103	-0.68	-0.333333	0.6	0.925926	-0.142857	0.142857		0
																		0	0.666667	0.916667	0.961538	0.785714	0.428571	0.533333	-0.272727	-0.777778	-0.333333	0.875	0.333333	0.833333	0.6	-0.285714	0	0.549296	0.666667	0	0.0967742	-0.230769	0	0	0.793103	-0.68	-0.333333	0.6	0.925926	-0.142857	0.142857		0
																		0	0.666667	0.916667	0.963636	0.785714	0.428571	0.533333	-0.272727	-0.8	-0.333333	0.875	0.333333	0.833333	0.6	-0.285714	0	0.527778	0.666667	0	0.0967742	-0.230769	0	0	0.793103	-0.68	-0.333333	0.6	0.925926	-0.142857	0.142857		0
																		0	0.666667	0.916667	0.963636	0.785714	0.428571	0.533333	-0.466667	-0.8	-0.333333	0.875	0.333333	0.833333	0.6	-0.285714	0	0.527778	0.666667	0	0.0967742	-0.230769	0	0	0.793103	-0.68	-0.333333	0.6	0.925926	-0.142857	0.142857		0
																		0	0.666667	0.916667	0.963636	0.785714	0.428571	0.483871	-0.466667	-0.8	-0.333333	0.875	0.333333	0.833333	0.6	-0.285714	0	0.527778	0.666667	0	0.0967742	-0.230769	0	0	0.793103	-0.68	-0.333333	0.6	0.925926	-0.142857	0.142857		0
																		0	0.666667	0.916667	0.963636	0.785714	0.428571	0.393939	-0.466667	-0.8	-0.333333	0.875	0.333333	0.833333	0.6	-0.285714	0	0.527778	0.666667	0	0.0967742	-0.230769	0	0	0.793103	-0.68	-0.333333	0.6	0.925926	-0.142857	0.142857		0
																		0	0.666667	0.916667	0.964286	0.785714	0.428571	0.393939	-0.466667	-0.8	-0.333333	0.875	0.333333	0.833333	0.6	-0.285714	0	0.527778	0.666667	0	0.0967742	-0.230769	0	0	0.793103	-0.68	-0.333333	0.6	0.925926	-0.142857	0.142857		0
																		0	0.666667	0.916667	0.964286	0.785714	0.428571	0.393939	-0.466667	-0.8	-0.333333	0.875	0.333333	0.833333	0.6	-0.285714	0	0.527778	0.666667	0	0.0967742	-0.230769	0	0	0.793103	-0.68	-0.333333	0.6	0.925926	-0.142857	0.142857		0
																		0	0.666667	0.916667	0.964286	0.785714	0.428571	0.393939	-0.466667	-0.8	-0.333333	0.875	0.333333	0.833333	0.6	-0.285714	0	0.527778	0.666667	0	0.0967742	-0.230769	0	0	0.793103	-0.68	-0.333333	0.6	0.925926	-0.142857	0.142857		0
																		0	0.666667	0.916667	0.964286	0.785714	0.428571	0.393939	-0.466667	-0.8	-0.333333	0.875	0.333333	0.833333	0.6	-0.285714	0	0.527778	0.666667	0	0.0967742	-0.230769	0	0	0.793103	-0.68	-0.333333	0.6	0.925926	-0.142857	0.142857		0
																		0	0.666667	0.916667	0.964286	0.785714	0.428571	0.393939	-0.466667	-0.8	-0.333333	0.875	0.333333	0.833333	0.6	-0.285714	0	0.527778	0.666667	0	0.0967742	-0.230769	0	0	0.793103	-0.68	-0.333333	0.6	0.925926	-0.142857	0.142857		0
																		0	0.666667	0.916667	0.964912	0.785714	0.428571	0.393939	-0.466667	-0.8	-0.333333	0.875	0.333333	0.833333	0.6	-0.285714	0	0.527778	0.666667	0	0.0967742	-0.230769	0	0	0.793103	-0.68	-0.333333	0.6	0.925926	-0.142857	0.142857		0
																		0	0.666667	0.916667	0.966667	0.785714	0.428571	0.393939	-0.466667	-0.8	-0.333333	0.875	0.333333	0.833333	0.6	-0.285714	0	0.534247	0.666667	0	0.0967742	-0.230769	0	0	0.793103	-0.692308	-0.333333	0.6	0.925926	-0.142857	0.142857		0
																		0	0.666667	0.916667	0.966667	0.785714	0.428571	0.393939	-0.466667	-0.8	-0.333333	0.875	0.333333	0.833333	0.6	-0.285714	0	0.534247	0.666667	0	0.0967742	-0.230769	0	0	0.793103	-0.692308	-0.333333	0.6	0.925926	-0.142857	0.142857		0
																		0	0.666667	0.916667	0.967213	0.785714	0.428571	0.393939	-0.466667	-0.8	-0.333333	0.875	0.333333	0.833333	0.6	-0.285714	0	0.534247	0.666667	0	0.0967742	-0.230769	0	0	0.793103	-0.692308	-0.333333	0.6	0.925926	-0.142857	0.142857		0
																		0	0.666667	0.916667	0.967213	0.785714	0.428571	0.393939	-0.466667	-0.8	-0.333333	0.875	0.333333	0.833333	0.6	-0.285714	0	0.534247	0.666667	0	0.0967742	-0.230769	0	0	0.793103	-0.692308	-0.333333	0.6	0.925926	-0.142857	0.142857		0
																		0	0.666667	0.916667	0.967213	0.785714	0.428571	0.393939	-0.466667	-0.8	-0.333333	0.875	0.333333	0.833333	0.6	-0.285714	0	0.534247	0.666667	0	0.0967742	-0.230769	0	0	0.793103	-0.692308	-0.333333	0.6	0.925926	-0.142857	0.142857		0
																		0	0.666667	0.916667	0.967213	0.785714	0.428571	0.393939	-0.466667	-0.8	-0.333333	0.875	0.333333	0.833333	0.6	-0.285714	0	0.534247	0.666667	0	0.125	-0.230769	0	0	0.793103	-0.692308	-0.333333	0.6	0.925926	-0.142857	0.142857		0
																		0	0.666667	0.916667	0.968254	0.785714	0.5	0.393939	-0.466667	-0.8	-0.333333	0.875	0.333333	0.833333	0.6	-0.285714	0	0.534247	0.666667	0	0.263158	-0.230769	0	0	0.793103	-0.692308	-0.333333	0.6	0.925926	-0.142857	0.142857		0
																		0	0.666667	0.916667	0.970149	0.785714	0.5	0.393939	-0.466667	-0.8	-0.333333	0.875	0.333333	0.833333	0.6	-0.285714	0	0.534247	0.666667	0	0.363636	-0.230769	0	0	0.793103	-0.692308	-0.333333	0.6	0.925926	-0.142857	0.142857		0
																		0	0.666667	0.916667	0.972973	0.785714	0.5	0.393939	-0.466667	-0.8	-0.333333	0.875	0.333333	0.833333	0.6	-0.285714	0	0.534247	0.666667	0	0.377778	-0.230769	0	0	0.793103	-0.692308	-0.333333	0.6	0.925926	-0.142857	0.142857		0
																		0	0.666667	0.916667	0.973684	0.785714	0.5	0.393939	-0.466667	-0.8	-0.333333	0.875	0.333333	0.833333	0.6	-0.285714	0	0.513513	0.666667	0	0.377778	-0.230769	0	0	0.793103	-0.692308	-0.333333	0.6	0.925926	-0.142857	0.142857		0
																		0	0.666667	0.916667	0.973684	0.785714	0.5	0.393939	-0.466667	-0.8	-0.333333	0.875	0.333333	0.833333	0.6	-0.285714	0	0.513513	0.666667	0	0.377778	-0.230769	0	0	0.793103	-0.692308	-0.333333	0.6	0.925926	-0.142857	0.142857		0
																		0	0.666667	0.916667	0.974359	0.785714	0.5	0.393939	-0.466667	-0.8	-0.333333	0.875	0.333333	0.833333	0.6	-0.285714	0	0.513513	0.666667	0	0.377778	-0.230769	0	0	0.793103	-0.692308	-0.333333	0.6	0.925926	-0.142857	0.142857		0
																		0	0.666667	0.916667	0.974684	0.785714	0.5	0.393939	-0.466667	-0.8	-0.333333	0.875	0.333333	0.833333	0.6	-0.285714	0	0.513513	0.666667	0	0.377778	-0.230769	0	0	0.828571	-0.692308	-0.333333	0.6	0.925926	-0.142857	0.142857		0
																		0	0.666667	0.916667	0.975	0.785714	0.5	0.393939	-0.466667	-0.8	-0.333333	0.875	0.333333	0.833333	0.6	-0.285714	0	0.513513	0.666667	0	0.377778	-0.230769	0	0	0.857143	-0.692308	-0.333333	0.6	0.925926	-0.142857	0.142857		0
																		0	0.666667	0.916667	0.97561	0.785714	0.5	0.393939	-0.466667	-0.8	-0.333333	0.875	0.333333	0.833333	0.6	-0.285714	0	0.513513	0.666667	0	0.377778	-0.230769	0	0	0.857143	-0.692308	-0.333333	0.6	0.925926	-0.142857	0.142857		0
																		0	0.666667	0.916667	0.977273	0.785714	0.5	0.393939	-0.466667	-0.8	-0.333333	0.875	0.333333	0.833333	0.6	-0.285714	0	0.513513	0.666667	0	0.377778	-0.230769	0	0	0.857143	-0.692308	-0.333333	0.6	0.925926	-0.142857	0.142857		0
																		0	0.666667	0.916667	0.978947	0.785714	0.5	0.393939	-0.466667	-0.8	-0.333333	0.875	0.333333	0.833333	0.6	-0.285714	0	0.513513	0.666667	0	0.377778	-0.230769	0	0	0.857143	-0.703704	-0.333333	0.6	0.925926	-0.142857	0.142857		0
																		0	0.666667	0.916667	0.979592	0.785714	0.5	0.393939	-0.466667	-0.8	-0.333333	0.875	0.333333	0.833333	0.6	-0.285714	0	0.513513	0.666667	0	0.377778	-0.230769	0	0	0.857143	-0.703704	-0.333333	0.6	0.925926	-0.142857	0.142857		0
																		0	0.666667	0.916667	0.980583	0.785714	0.5	0.393939	-0.466667	-0.8	-0.333333	0.875	0.333333	0.833333	0.6	-0.285714	0	0.513513	0.666667	0	0.377778	-0.230769	0	0	0.857143	-0.703704	-0.333333	0.6	0.925926	-0.142857	0.142857		0
																		0	0.666667	0.916667	0.980952	0.785714	0.5	0.393939	-0.466667	-0.8	-0.333333	0.875	0.333333	0.833333	0.6	-0.285714	0	0.513513	0.666667	0	0.377778	-0.230769	0	0	0.857143	-0.703704	-0.333333	0.6	0.925926	-0.142857	0.142857		0
																		0	0.666667	0.916667	0.981132	0.785714	0.5	0.393939	-0.466667	-0.8	-0.333333	0.875	0.333333	0.833333	0.6	-0.285714	0	0.513513	0.666667	0	0.377778	-0.230769	0	0	0.857143	-0.703704	-0.333333	0.6	0.925926	-0.142857	0.142857		0
																		0	0.666667	0.916667	0.981651	0.785714	0.5	0.393939	-0.466667	-0.8	-0.333333	0.875	0.333333	0.833333	0.6	-0.285714	0	0.513513	0.666667	0	0.377778	-0.285714	0	0	0.857143	-0.703704	-0.333333	0.6	0.925926	-0.142857	0.142857		0
																		0	0.666667	0.916667	0.981982	0.785714	0.5	0.393939	-0.466667	-0.8	-0.333333	0.875	0.333333	0.833333	0.6	-0.285714	0	0.513513	0.666667	0	0.377778	-0.285714	0	0	0.857143	-0.703704	-0.333333	0.6	0.925926	-0.142857	0.142857		0
																		0	0.666667	0.916667	0.982143	0.785714	0.5	0.393939	-0.466667	-0.8	-0.333333	0.875	0.333333	0.833333	0.6	-0.285714	0	0.513513	0.666667	0	0.377778	-0.285714	0	0	0.857143	-0.703704	-0.333333	0.6	0.925926	-0.142857	0.142857		0
																		0	0.666667	0.916667	0.982609	0.785714	0.5	0.393939	-0.466667	-0.8	-0.333333	0.875	0.333333	0.833333	0.6	-0.285714	0	0.513513	0.666667	0	0.377778	-0.285714	0	0	0.857143	-0.703704	-0.333333	0.6	0.925926	-0.142857	0.142857		0
																		0	0.666667	0.916667	0.983607	0.785714	0.5	0.393939	-0.466667	-0.8	-0.333333	0.875	0.333333	0.833333	0.6	-0.285714	0	0.513513	0.666667	0	0.377778	-0.285714	0	0	0.857143	-0.703704	-0.384615	0.6	0.925926	-0.142857	0.142857		0
																		0	0.666667	0.916667	0.984127	0.785714	0.5	0.393939	-0.466667	-0.8	-0.333333	0.875	0.333333	0.833333	0.6	-0.285714	0	0.513513	0.666667	0	0.377778	-0.285714	0	0	0.857143	-0.703704	-0.384615	0.6	0.925926	-0.142857	0.142857		0
																		0	0.666667	0.916667	0.984733	0.785714	0.5	0.393939	-0.466667	-0.8	-0.333333	0.875	0.333333	0.833333	0.6	-0.285714	0	0.513513	0.666667	0	0.377778	-0.285714	0	0	0.857143	-0.703704	-0.384615	0.6	0.925926	-0.142857	0.142857		0
																		0	0.666667	0.916667	0.984733	0.785714	0.5	0.393939	-0.466667	-0.8	-0.333333	0.875	0.333333	0.833333	0.6	-0.285714	0	0.513513	0.666667	0	0.377778	-0.285714	0	0	0.857143	-0.703704	-0.384615	0.6	0.925926	-0.142857	0.142857		0
																		0	0.666667	0.916667	0.985294	0.785714	0.5	0.393939	-0.466667	-0.8	-0.333333	0.875	0.333333	0.833333	0.6	-0.285714	0	0.513513	0.666667	0	0.377778	-0.285714	0	0	0.857143	-0.703704	-0.384615	0.6	0.925926	-0.142857	0.142857		0
																		0	0.666667	0.916667	0.985402	0.785714	0.5	0.393939	-0.466667	-0.8	-0.333333	0.875	0.333333	0.833333	0.6	-0.285714	0	0.513513	0.666667	0	0.377778	-0.285714	0	0	0.857143	-0.703704	-0.384615	0.6	0.925926	-0.142857	0.142857		0
																		0	0.666667	0.916667	0.985816	0.785714	0.5	0.393939	-0.466667	-0.8	-0.333333	0.875	0.333333	0.833333	0.6	-0.285714	0	0.513513	0.666667	0	0.377778	-0.285714	0	0	0.857143	-0.703704	-0.384615	0.6	0.925926	-0.142857	0.142857		0
																		0	0.666667	0.916667	0.986207	0.785714	0.5	0.393939	-0.466667	-0.8	-0.333333	0.875	0.333333	0.833333	0.6	-0.285714	0	0.513513	0.666667	0	0.377778	-0.285714	0	0	0.857143	-0.703704	-0.384615	0.6	0.925926	-0.142857	0.142857		0
																		0	0.666667	0.916667	0.986301	0.785714	0.5	0.393939	-0.466667	-0.8	-0.333333	0.875	0.333333	0.833333	0.666667	-0.285714	0	0.513513	0.666667	0	0.377778	-0.285714	0	0	0.857143	-0.703704	-0.384615	0.6	0.925926	-0.142857	0.142857		0
																		0	0.666667	0.916667	0.986487	0.785714	0.5	0.393939	-0.466667	-0.8	-0.333333	0.875	0.333333	0.833333	0.666667	-0.285714	0	0.513513	0.666667	0	0.377778	-0.333333	0	0	0.857143	-0.703704	-0.384615	0.6	0.925926	-0.142857	0.142857		0
																		0	0.666667	0.916667	0.986755	0.793103	0.5	0.393939	-0.466667	-0.8	-0.333333	0.875	0.333333	0.833333	0.666667	-0.285714	0	0.513513	0.666667	0	0.377778	-0.333333	0	0	0.857143	-0.703704	0	0.6	0.925926	-0.142857	0.142857		0
																		0	0.666667	0.916667	0.986842	0.823529	0.5	0.393939	-0.466667	-0.8	-0.333333	0.875	0.333333	0.833333	0.666667	-0.285714	0	0.513513	0.666667	0	0.377778	-0.333333	0	0	0.857143	-0.703704	0.25	0.6	0.925926	-0.142857	0.142857		0
																		0.333333	0.666667	0.916667	0.987342	0.860465	0.5	0.393939	-0.466667	-0.8	-0.333333	0.875	0.333333	0.833333	0.666667	-0.285714	0	0.513513	0.666667	0	0.377778	-0.333333	0	0	0.857143	-0.703704	0.25	0.6	0.925926	-0.142857	0.142857		0
																		0.75	0.666667	0.916667	0.987654	0.869565	0.5	0.393939	-0.466667	-0.8	-0.333333	0.875	0.333333	0.833333	0.666667	-0.285714	0	0.513513	0.666667	0	0.377778	-0.333333	0	0	0.857143	-0.703704	0.25	0.6	0.925926	-0.142857	0.142857		0
																		0.818182	0.666667	0.916667	0.987879	0.87234	0.5	0.393939	-0.466667	-0.8	-0.333333	0.875	0.333333	0.833333	0.666667	-0.285714	0	0.493333	0.666667	0	0.377778	-0.333333	0	0	0.857143	-0.703704	0.25	0.6	0.925926	-0.142857	0.142857		0
																		0.866667	0.666667	0.916667	0.988095	0.87234	0.5	0.393939	-0.466667	-0.8	-0.333333	0.875	0.333333	0.833333	0.666667	-0.285714	0	0.493333	0.666667	0	0.377778	-0.333333	0	0	0.857143	-0.703704	0.25	0.6	0.925926	-0.142857	0.142857		0
																		0.9	0.666667	0.916667	0.988439	0.87234	0.5	0.393939	-0.466667	-0.8	-0.333333	0.875	0.333333	0.833333	0.666667	-0.285714	0	0.493333	0.666667	0	0.377778	-0.333333	0	0	0.857143	-0.703704	0.25	0.6	0.925926	-0.142857	0.142857		0
																		0.916667	0.666667	0.916667	0.988571	0.87234	0.5	0.393939	-0.466667	-0.8	-0.333333	0.875	0.333333	0.833333	0.666667	-0.285714	0	0.493333	0.666667	0	0.377778	-0.333333	0	0	0.877551	-0.703704	0.25	0.6	0.925926	-0.142857	0.142857		0
																		0.923077	0.666667	0.916667	0.98895	0.87234	0.5	0.393939	-0.466667	-0.8	-0.333333	0.875	0.333333	0.833333	0.666667	-0.285714	-0.6	0.493333	0.666667	0	0.377778	-0.333333	0	0	0.877551	-0.703704	0.25	0.6	0.925926	-0.142857	0.142857		0
																		0.928571	0.666667	0.916667	0.989362	0.87234	0.5	0.393939	-0.466667	-0.8	-0.333333	0.875	0.333333	0.833333	0.666667	-0.285714	-0.6	0.493333	0.666667	0	0.377778	-0.333333	0	0	0.877551	-0.703704	0.25	0.6	0.925926	-0.142857	0.142857		0
																		0.9375	0.666667	0.916667	0.989848	0.87234	0.5	0.393939	-0.466667	-0.8	-0.333333	0.875	0.333333	0.833333	0.666667	-0.285714	-0.6	0.493333	0.666667	0	0.377778	-0.333333	0	0	0.877551	-0.703704	0.25	0.6	0.925926	-0.142857	0.142857		0
																		0.945946	0.666667	0.916667	0.990338	0.87234	0.5	0.393939	-0.466667	-0.8	-0.333333	0.875	0.333333	0.833333	0.666667	-0.285714	-0.6	0.493333	0.666667	0	0.265306	-0.333333	0	0	0.877551	-0.703704	0.28	0.6	0.925926	-0.142857	0.142857		0
																		0.953488	0.666667	0.916667	0.990698	0.87234	0.5	0.393939	-0.466667	-0.8	-0.333333	0.875	0.333333	0.833333	0.666667	-0.285714	-0.6	0.493333	0.666667	0	0.265306	-0.333333	0	0	0.877551	-0.703704	0.28	0.6	0.925926	-0.142857	0.142857		0
																		0.96	0.666667	0.916667	0.991189	0.87234	0.5	0.393939	-0.466667	-0.8	-0.333333	0.875	0.333333	0.833333	0.666667	-0.285714	-0.6	0.493333	0.666667	0	0.265306	-0.333333	0	0	0.877551	-0.703704	0.28	0.6	0.925926	-0.142857	0.142857		0
																		0.961538	0.666667	0.916667	0.991453	0.87234	0.5	0.393939	-0.466667	-0.8	-0.333333	0.875	0.333333	0.833333	0.666667	-0.285714	-0.6	0.493333	0.666667	0	0.265306	-0.333333	0	0	0.877551	-0.703704	0.28	0.6	0.925926	-0.142857	0.142857		0
																		0.962264	0.666667	0.916667	0.991803	0.87234	0.5	0.393939	-0.466667	-0.8	-0.333333	0.875	0.333333	0.833333	0.666667	-0.285714	-0.6	0.493333	0.666667	0	0.265306	-0.333333	0	0	0.877551	-0.703704	0.28	0.6	0.925926	-0.142857	0.142857		0
																		0.962963	0.666667	0.916667	0.991935	0.87234	0.5	0.393939	-0.466667	-0.8	-0.333333	0.875	0.333333	0.833333	0.666667	-0.285714	-0.6	0.493333	0.666667	0	0.265306	-0.333333	0	0	0.877551	-0.703704	0.28	0.6	0.925926	-0.142857	0.142857		0
																		0.964286	0.666667	0.916667	0.992	0.87234	0.5	0.393939	-0.466667	-0.8	-0.333333	0.875	0.333333	0.833333	0.666667	-0.285714	-0.6	0.493333	0.666667	0	0.265306	-0.333333	0	0	0.877551	-0.703704	0.28	0.6	0.925926	-0.142857	0.142857		0
																		0.964286	0.666667	0.916667	0.992157	0.87234	0.5	0.393939	-0.466667	-0.8	-0.333333	0.875	0.333333	0.833333	0.666667	-0.285714	-0.6	0.493333	0.666667	0	0.265306	-0.333333	0	0	0.877551	-0.703704	0.28	0.6	0.925926	-0.142857	0.142857		0
																		0.967742	0.666667	0.916667	0.992395	0.87234	0.5	0.393939	-0.466667	-0.8	-0.333333	0.875	0.333333	0.833333	0.666667	-0.285714	-0.6	0.493333	0.666667	0	0.265306	-0.333333	0	0	0.877551	-0.703704	0.28	0.6	0.925926	-0.142857	0.142857		0
																		0.970149	0.666667	0.916667	0.962963	0.87234	0.5	0.393939	-0.466667	-0.8	-0.333333	0.875	0.333333	0.833333	0.666667	-0.285714	-0.6	0.493333	0.666667	0	0.24	-0.333333	0	0	0.877551	-0.703704	0.28	0.6	0.925926	-0.142857	0.142857		0
																		0.972222	0.666667	0.916667	0.963899	0.87234	0.5	0.393939	-0.466667	-0.8	-0.333333	0.875	0.333333	0.833333	0.666667	-0.285714	-0.6	0.493333	0.666667	0	0.169811	-0.333333	0	0	0.877551	-0.703704	0.28	0.6	0.925926	-0.142857	0.142857		0
																		0.972603	0.666667	0.916667	0.965517	0.87234	0.5	0.393939	-0.466667	-0.8	-0.333333	0.875	0.333333	0.833333	0.666667	-0.285714	-0.6	0.493333	0.666667	0	0.169811	-0.333333	0	0	0.877551	-0.703704	0.28	0.6	0.925926	-0.142857	0.142857		0
																		0.973333	0.666667	0.916667	0.96633	0.87234	0.5	0.393939	-0.466667	-0.8	-0.333333	0.875	0.333333	0.833333	0.666667	-0.285714	-0.6	0.493333	0.666667	0	0.169811	-0.333333	0	0	0.877551	-0.703704	0.28	0.6	0.925926	-0.142857	0.142857		0
																		0.974359	0.666667	0.916667	0.967105	0.87234	0.5	0.393939	-0.466667	-0.8	-0.333333	0.875	0.333333	0.833333	0.666667	-0.285714	-0.6	0.493333	0.666667	0	0.169811	-0.333333	0	0	0.877551	-0.703704	0.28	0.6	0.925926	-0.142857	0.142857		0
																		0.97561	0.666667	0.916667	0.968553	0.87234	0.5	0.393939	-0.466667	-0.8	-0.333333	0.875	0.333333	0.833333	0.666667	-0.285714	-0.6	0.493333	0.666667	0	0.169811	-0.333333	0	0	0.877551	-0.703704	0.28	0.6	0.925926	-0.142857	0.142857		0
																		0.975904	0.666667	0.916667	0.969136	0.87234	0.5	0.393939	-0.466667	-0.8	-0.333333	0.875	0.333333	0.833333	0.666667	-0.285714	-0.6	0.493333	0.666667	0	0.169811	-0.333333	0	0	0.877551	-0.703704	0.28	0.6	0.925926	-0.142857	0.142857		0
																		0.976744	0.666667	0.916667	0.969605	0.87234	0.5	0.393939	-0.466667	-0.8	-0.333333	0.875	0.333333	0.833333	0.666667	-0.285714	-0.6	0.493333	0.666667	0	0.169811	-0.333333	0	0	0.877551	-0.703704	0.28	0.6	0.925926	-0.142857	0.142857		0
																		0.978022	0.666667	0.916667	0.969605	0.87234	0.5	0.393939	-0.466667	-0.8	-0.333333	0.875	0.333333	0.833333	0.666667	-0.285714	-0.6	0.493333	0.666667	0	0.169811	-0.333333	0	0	0.877551	-0.703704	0.28	0.6	0.925926	-0.142857	0.142857		0
																		0.978261	0.666667	0.916667	0.969605	0.87234	0.5	0.393939	-0.466667	-0.8	-0.333333	0.875	0.333333	0.833333	0.666667	-0.285714	-0.6	0.493333	0.666667	0	0.169811	-0.333333	0	0	0.877551	-0.703704	0.28	0.6	0.925926	-0.142857	0.142857		0
																		0.978261	0.666667	0.916667	0.969605	0.87234	0.5	0.393939	-0.466667	-0.8	-0.333333	0.875	0.333333	0.833333	0.666667	-0.285714	-0.6	0.493333	0.666667	0	0.169811	-0.333333	0	0	0.877551	-0.703704	0.28	0.6	0.925926	-0.142857	0.142857		0
																		0.978261	0.666667	0.916667	0.969605	0.87234	0.5	0.393939	-0.466667	-0.8	-0.333333	0.875	0.333333	0.833333	0.666667	-0.285714	-0.6	0.493333	0.666667	0	0.169811	-0.333333	0	0	0.877551	-0.703704	0.28	0.6	0.925926	-0.142857	0.142857		0
																		0.978261	0.666667	0.916667	0.969605	0.87234	0.5	0.393939	-0.466667	-0.8	-0.333333	0.875	0.333333	0.833333	0.666667	-0.285714	-0.6	0.493333	0.666667	0	0.169811	-0.333333	0	0	0.877551	-0.703704	0.28	0.6	0.925926	-0.142857	0.142857		0
																		0.978261	0.666667	0.916667	0.969605	0.87234	0.5	0.393939	-0.466667	-0.8	-0.333333	0.875	0.333333	0.833333	0.666667	-0.285714	-0.6	0.493333	0.666667	0	0.169811	-0.333333	0	0	0.877551	-0.703704	0.28	0.6	0.925926	-0.142857	0.142857		0
																		0.978261	0.666667	0.916667	0.969605	0.875	0.5	0.393939	-0.466667	-0.8	-0.333333	0.875	0.333333	0.833333	0.666667	-0.285714	-0.6	0.493333	0.666667	0	0.169811	-0.333333	0	0	0.877551	-0.703704	0.28	0.6	0.925926	-0.142857	0.142857		0
																		0.978261	0.666667	0.916667	0.969605	0.875	0.5	0.393939	-0.466667	-0.8	-0.333333	0.875	0.333333	0.833333	0.666667	-0.285714	-0.6	0.493333	0.666667	0	0.169811	-0.333333	0	0	0.877551	-0.703704	0.28	0.6	0.925926	-0.142857	0.142857		0
																		0.978261	0.666667	0.916667	0.969605	0.875	0.5	0.393939	-0.466667	-0.8	-0.333333	0.875	0.333333	0.833333	0.666667	-0.285714	-0.6	0.493333	0.666667	0	0.169811	-0.333333	0	0	0.877551	-0.703704	0.28	0.6	0.925926	-0.142857	0.142857		0
																		0.978261	0.666667	0.916667	0.969605	0.875	0.5	0.393939	-0.466667	-0.8	-0.333333	0.875	0.333333	0.833333	0.666667	-0.285714	-0.6	0.493333	0.666667	0	0.169811	-0.333333	0	0	0.877551	-0.703704	0.28	0.6	0.925926	-0.142857	0.142857		0
																		0.978261	0.666667	0.916667	0.969605	0.875	0.5	0.393939	-0.466667	-0.8	-0.333333	0.875	0.333333	0.833333	0.666667	-0.285714	-0.6	0.493333	0.666667	0	0.169811	-0.333333	0	0	0.877551	-0.703704	0.28	0.6	0.925926	-0.142857	0.142857		0
																		0.978261	0.666667	0.916667	0.969605	0.875	0.5	0.393939	-0.466667	-0.8	-0.333333	0.875	0.333333	0.833333	0.666667	-0.285714	-0.6	0.493333	0.666667	0	0.169811	-0.333333	0	0	0.877551	-0.703704	0.28	0.6	0.925926	-0.142857	0.142857		0
																		0.978261	0.666667	0.916667	0.969605	0.875	0.5	0.393939	-0.466667	-0.8	-0.333333	0.875	0.333333	0.833333	0.666667	-0.285714	-0.6	0.493333	0.666667	0	0.169811	-0.333333	0	0	0.877551	-0.714286	0.28	0.6	0.925926	-0.142857	0.142857		0
																		0.978261	0.666667	0.916667	0.969605	0.875	0.5	0.393939	-0.466667	-0.8	-0.333333	0.875	0.333333	0.833333	0.666667	-0.285714	-0.6	0.493333	0.666667	0	0.169811	-0.333333	0	-0.6	0.877551	-0.714286	0.28	0.6	0.925926	-0.142857	0.142857		0
																		0.978261	0.666667	0.916667	0.969605	0.877551	0.5	0.393939	-0.466667	-0.8	-0.333333	0.875	0.333333	0.833333	0.666667	-0.285714	-0.6	0.493333	0.666667	0	0.169811	-0.333333	0	-0.75	0.877551	-0.714286	0.28	0.6	0.925926	0.333333	0.142857		0
																		0.978261	0.666667	0.916667	0.969605	0.877551	0.5	0.393939	-0.466667	-0.8	-0.333333	0.875	0.333333	0.833333	0.666667	-0.285714	-0.6	0.493333	0.666667	0	0.169811	-0.333333	0	-0.894737	0.877551	-0.714286	0.230769	0.6	0.925926	0.529412	0.142857		0
																		0.978261	0.666667	0.916667	0.969605	0.877551	0.5	0.393939	-0.466667	-0.8	-0.333333	0.875	0.333333	0.833333	0.666667	-0.285714	-0.6	0.493333	0.666667	0	0.169811	-0.375	0	-0.904762	0.877551	-0.714286	0.230769	0.6	0.925926	0.666667	0.142857		0
																		0.978261	0.666667	0.916667	0.969605	0.877551	0.555556	0.393939	-0.466667	-0.8	-0.333333	0.875	0.333333	0.833333	0.666667	-0.285714	-0.6	0.493333	0.666667	0	0.169811	-0.375	0	-0.904762	0.877551	-0.714286	0.230769	0.6	0.925926	0.68	0.142857		0
																		0.978261	0.666667	0.916667	0.969605	0.877551	0.555556	0.393939	-0.466667	-0.8	-0.333333	0.875	0.333333	0.833333	0.666667	-0.285714	-0.6	0.493333	0.666667	0	0.169811	-0.375	0	-0.909091	0.877551	-0.714286	0.230769	0.6	0.925926	0.692308	0.142857		0
																		0.978261	0.666667	0.916667	0.969605	0.877551	0.555556	0.393939	-0.466667	-0.8	-0.333333	0.875	0.333333	0.833333	0.666667	-0.285714	-0.6	0.493333	0.666667	0	0.169811	-0.375	0	-0.909091	0.877551	-0.714286	0.230769	0.6	0.925926	0.692308	0.142857		0
																		0.978261	0.666667	0.916667	0.969605	0.877551	0.555556	0.393939	-0.466667	-0.8	-0.333333	0.875	0.333333	0.833333	0.666667	-0.285714	-0.6	0.493333	0.666667	0	0.169811	-0.375	0	-0.909091	0.877551	-0.714286	0.230769	0.6	0.925926	0.692308	0.142857		0
																		0.978261	0.666667	0.916667	0.969605	0.877551	0.555556	0.393939	-0.466667	-0.8	-0.333333	0.875	0.333333	0.833333	0.666667	-0.285714	-0.6	0.493333	0.666667	0	0.169811	-0.375	0	-0.909091	0.877551	-0.714286	0.230769	0.6	0.925926	0.692308	0.142857		0
																		0.978261	0.666667	0.916667	0.969605	0.877551	0.555556	0.393939	-0.466667	-0.8	-0.333333	0.875	0.333333	0.833333	0.666667	-0.285714	-0.6	0.493333	0.666667	0	0.169811	-0.375	0	-0.909091	0.877551	-0.714286	0.230769	0.6	0.925926	0.692308	0.142857		0
																		0.978261	0.666667	0.916667	0.969605	0.877551	0.555556	0.393939	-0.466667	-0.8	-0.333333	0.875	0.333333	0.833333	0.666667	-0.285714	-0.6	0.493333	0.666667	0	0.169811	-0.375	0	-0.909091	0.877551	-0.714286	0.230769	0.6	0.925926	0.692308	0.142857		0
																		0.978261	0.666667	0.916667	0.969605	0.877551	0.555556	0.393939	-0.466667	-0.8	-0.333333	0.875	0.333333	0.833333	0.666667	-0.285714	-0.6	0.493333	0.666667	0	0.169811	-0.375	0	-0.909091	0.877551	-0.714286	0.230769	0.6	0.925926	0.692308	0.142857		0
																		0.978261	0.666667	0.916667	0.969605	0.877551	0.555556	0.393939	-0.466667	-0.8	-0.333333	0.875	0.333333	0.833333	0.666667	-0.285714	-0.6	0.493333	0.666667	0	0.169811	-0.375	0	-0.909091	0.877551	-0.714286	0.230769	0.6	0.925926	0.692308	0.142857		0
																		0.978261	0.666667	0.916667	0.969605	0.877551	0.555556	0.393939	-0.466667	-0.8	-0.333333	0.875	0.333333	0.833333	0.666667	-0.285714	-0.6	0.493333	0.666667	0	0.169811	-0.375	0	-0.909091	0.877551	-0.714286	0.230769	0.6	0.925926	0.692308	0.142857		0
																		0.978261	0.666667	0.916667	0.969605	0.877551	0.555556	0.393939	-0.466667	-0.8	-0.333333	0.875	0.333333	0.833333	0.666667	-0.285714	-0.6	0.493333	0.666667	0	0.169811	-0.375	0	-0.909091	0.877551	-0.714286	0.230769	0.6	0.925926	0.692308	0.142857		0
																		0.978261	0.666667	0.916667	0.969605	0.877551	0.555556	0.393939	-0.466667	-0.8	-0.333333	0.875	0.333333	0.833333	0.666667	-0.285714	-0.6	0.493333	0.666667	0	0.169811	-0.375	0	-0.909091	0.877551	-0.714286	0.230769	0.6	0.925926	0.692308	0.142857		0
																		0.978261	0.666667	0.916667	0.969605	0.877551	0.555556	0.393939	-0.466667	-0.8	-0.333333	0.875	0.333333	0.857143	0.666667	-0.285714	-0.6	0.493333	0.666667	0	0.169811	-0.375	0	-0.909091	0.877551	-0.714286	0.230769	0.6	0.925926	0.692308	0.142857		0
																		0.978261	0.666667	0.916667	0.969605	0.877551	0.555556	0.393939	-0.466667	-0.8	-0.333333	0.875	0.333333	0.857143	0.666667	-0.285714	-0.6	0.493333	0.666667	0	0.169811	-0.375	0	-0.909091	0.877551	-0.714286	0.230769	0.6	0.925926	0.692308	0.142857		0
																		0.978261	0.666667	0.916667	0.969605	0.877551	0.555556	0.393939	-0.466667	-0.8	-0.333333	0.875	0.333333	0.857143	0.666667	-0.285714	-0.6	0.493333	0.666667	0	0.169811	-0.375	0	-0.909091	0.877551	-0.714286	0.230769	0.6	0.925926	0.692308	0.142857		0
																		0.978261	0.666667	0.916667	0.969605	0.877551	0.555556	0.393939	-0.466667	-0.8	-0.333333	0.875	0.333333	0.857143	0.666667	-0.285714	-0.6	0.493333	0.666667	0	0.169811	-0.375	0	-0.909091	0.877551	-0.714286	0.230769	0.6	0.925926	0.692308	0.142857		0
																		0.978261	0.666667	0.916667	0.969605	0.877551	0.555556	0.393939	-0.466667	-0.8	-0.333333	0.875	0.333333	0.857143	0.666667	-0.285714	-0.6	0.493333	0.666667	0	0.169811	-0.375	0	-0.909091	0.877551	-0.724138	0.230769	0.6	0.925926	0.692308	0.142857		0
																		0.978261	0.666667	0.916667	0.969605	0.877551	0.555556	0.393939	-0.466667	-0.8	-0.333333	0.875	0.333333	0.857143	0.666667	-0.285714	-0.6	0.493333	0.666667	0	0.169811	-0.375	0	-0.909091	0.877551	-0.724138	0.230769	0.6	0.925926	0.692308	0.142857		0
																		0.978261	0.666667	0.916667	0.969605	0.877551	0.555556	0.393939	-0.466667	-0.8	-0.333333	0.875	0.333333	0.857143	0.666667	-0.285714	-0.6	0.473684	0.666667	0	0.169811	-0.375	0	-0.909091	0.877551	-0.724138	0.230769	0.6	0.925926	0.692308	0.142857		0
																		0.978261	0.666667	0.916667	0.969605	0.877551	0.555556	0.393939	-0.466667	-0.8	-0.333333	0.875	0.333333	0.857143	0.666667	-0.285714	-0.6	0.473684	0.666667	0	0.169811	-0.375	0	-0.909091	0.877551	-0.724138	0.230769	0.6	0.925926	0.692308	0.142857		0
																		0.978261	0.666667	0.916667	0.969605	0.877551	0.555556	0.393939	-0.466667	-0.8	-0.333333	0.875	0.333333	0.857143	0.666667	-0.285714	-0.6	0.473684	0.666667	0	0.169811	-0.294118	0	-0.909091	0.877551	-0.724138	0.230769	0.6	0.925926	0.692308	0.142857		0
																		0.978261	0.666667	0.916667	0.969605	0.877551	0.555556	0.393939	-0.466667	-0.8	-0.333333	0.875	0.333333	0.857143	0.666667	-0.285714	-0.6	0.473684	0.666667	0	0.169811	-0.294118	0	-0.909091	0.877551	-0.724138	0.230769	0.6	0.925926	0.692308	0.142857		0
																		0.978261	0.666667	0.916667	0.969605	0.877551	0.555556	0.393939	-0.466667	-0.8	-0.333333	0.875	0.333333	0.857143	0.666667	-0.285714	-0.6	0.473684	0.666667	0	0.169811	-0.294118	0	-0.909091	0.877551	-0.724138	0.230769	0.6	0.925926	0.692308	0.142857		0
																		0.978261	0.666667	0.916667	0.969605	0.877551	0.555556	0.393939	-0.466667	-0.8	-0.333333	0.875	0.333333	0.857143	0.666667	-0.285714	-0.6	0.473684	0.666667	0	0.169811	-0.294118	0	-0.909091	0.877551	-0.724138	0.230769	0.6	0.925926	0.692308	0.142857		0
																		0.978261	0.666667	0.916667	0.969605	0.88	0.555556	0.393939	-0.466667	-0.8	-0.333333	0.875	0.333333	0.857143	0.666667	-0.285714	-0.6	0.473684	0.666667	0	0.169811	-0.294118	0	-0.909091	0.877551	-0.724138	0.230769	0.6	0.925926	0.692308	0.142857		0
																		0.978261	0.666667	0.916667	0.969605	0.88	0.555556	0.393939	-0.466667	-0.8	-0.333333	0.875	0.333333	0.857143	0.666667	-0.285714	-0.6	0.473684	0.666667	0	0.169811	-0.333333	0	-0.909091	0.877551	-0.724138	0.230769	0.6	0.925926	0.692308	0.142857		0
																		0.978261	0.666667	0.916667	0.969605	0.88	0.555556	0.393939	-0.466667	-0.8	-0.333333	0.875	0.333333	0.857143	0.666667	-0.285714	-0.6	0.473684	0.666667	0	0.169811	-0.333333	0	-0.909091	0.877551	-0.724138	0.230769	0.6	0.925926	0.692308	0.142857		0
																		0.978261	0.666667	0.916667	0.969605	0.88	0.555556	0.393939	-0.466667	-0.8	-0.333333	0.875	0.333333	0.857143	0.666667	-0.285714	-0.6	0.473684	0.666667	0	0.169811	-0.333333	0	-0.909091	0.877551	-0.724138	0.230769	0.6	0.925926	0.692308	0.142857		0
																		0.978261	0.666667	0.916667	0.969605	0.88	0.555556	0.393939	-0.466667	-0.8	-0.333333	0.875	0.333333	0.857143	0.666667	-0.285714	-0.6	0.473684	0.666667	0	0.169811	-0.333333	0	-0.909091	0.877551	-0.724138	0.230769	0.6	0.925926	0.692308	0.142857		0
																		0.978261	0.666667	0.916667	0.969605	0.88	0.555556	0.393939	-0.466667	-0.8	-0.333333	0.875	0.333333	0.857143	0.666667	-0.285714	-0.6	0.473684	0.666667	0	0.169811	-0.333333	0	-0.909091	0.877551	-0.724138	0.230769	0.6	0.925926	0.692308	0.142857		0
																		0.978261	0.666667	0.916667	0.969605	0.88	0.555556	0.393939	-0.466667	-0.8	-0.333333	0.875	0.333333	0.857143	-0.0909091	-0.285714	-0.6	0.473684	0.666667	0	0.0877193	-0.333333	0	-0.909091	0.877551	-0.724138	0.230769	0.6	0.925926	0.692308	0.142857		0
																		0.978261	0.666667	0.916667	0.969605	0.88	0.555556	0.393939	-0.466667	-0.8	-0.333333	0.875	0.333333	0.857143	-0.545454	-0.285714	-0.6	0.473684	0.666667	0.333333	0.0333333	-0.333333	0	-0.909091	0.877551	-0.724138	0.230769	0.6	0.925926	0.692308	0.142857		0
																		0.978261	0.666667	0.916667	0.969605	0.88	0.555556	0.393939	-0.466667	-0.8	-0.333333	0.875	0.333333	0.857143	-0.545454	-0.285714	-0.6	0.473684	0.666667	0.75	0.0333333	-0.333333	0	-0.909091	0.877551	-0.724138	0.230769	0.6	0.925926	0.692308	0.142857		0
																		0.978261	0.666667	0.916667	0.969605	0.88	0.555556	0.393939	-0.466667	-0.8	-0.333333	0.875	0.333333	0.857143	-0.545454	-0.285714	-0.6	0.473684	0.666667	0.818182	0.0163934	-0.333333	0	-0.909091	0.877551	-0.724138	0.230769	0.6	0.925926	0.692308	0.142857		0
																		0.978261	0.666667	0.916667	0.969605	0.88	0.555556	0.393939	-0.466667	-0.8	-0.333333	0.875	0.5	0.857143	-0.545454	-0.285714	-0.6	0.473684	0.666667	0.875	0.0163934	-0.368421	0	-0.909091	0.877551	-0.724138	0.230769	0.6	0.925926	0.692308	0.142857		0
																		0.978261	0.666667	0.916667	0.969605	0.88	0.555556	0.393939	-0.466667	-0.8	-0.333333	0.875	0.5	0.857143	-0.545454	-0.285714	-0.6	0.473684	0.666667	0.882353	0.0163934	-0.368421	0	-0.909091	0.877551	-0.724138	0.230769	0.6	0.925926	0.692308	0.142857		0
																		0.978261	0.666667	0.916667	0.969605	0.88	0.555556	0.393939	-0.466667	-0.8	-0.333333	0.875	0.5	0.857143	-0.545454	-0.285714	-0.6	0.473684	0.666667	0.882353	0.0163934	-0.368421	0	-0.909091	0.877551	-0.724138	0.230769	0.6	0.925926	0.692308	0.142857		0
																		0.978261	0.69697	0.916667	0.969605	0.88	0.555556	0.393939	-0.466667	-0.8	-0.333333	0.875	0.5	0.857143	-0.545454	-0.285714	-0.6	0.473684	0.666667	0.882353	0.0163934	-0.368421	0	-0.909091	0.877551	-0.724138	0.230769	0.6	0.925926	0.692308	0.142857		0
																		0.978261	0.69697	0.916667	0.969605	0.88	0.555556	0.393939	-0.466667	-0.8	-0.333333	0.875	0.5	0.857143	-0.545454	-0.285714	-0.6	0.473684	0.666667	0.882353	0.0163934	-0.368421	0	-0.909091	0.877551	-0.724138	0.230769	0.6	0.925926	0.692308	0.142857		0
																		0.978261	0.69697	0.916667	0.969605	0.88	0.555556	0.393939	-0.466667	-0.8	-0.333333	0.304348	0.5	0.857143	-0.545454	-0.285714	-0.6	0.473684	0.666667	0.882353	0.0163934	-0.368421	0	-0.909091	0.877551	-0.724138	0.230769	0.6	0.925926	0.692308	0.142857		0
																		0.978261	0.69697	0.916667	0.969605	0.88	0.555556	0.393939	-0.466667	-0.8	-0.333333	0.304348	0.5	0.857143	-0.545454	-0.285714	-0.6	0.473684	0.666667	0.882353	0.0163934	-0.368421	0	-0.909091	0.877551	-0.724138	0.230769	0.6	0.925926	0.692308	0.142857		0
																		0.978261	0.69697	0.916667	0.969605	0.88	0.555556	0.393939	-0.466667	-0.8	-0.333333	0.304348	0.5	0.857143	-0.545454	-0.285714	-0.6	0.473684	0.666667	0.882353	0.0163934	-0.368421	0	-0.909091	0.877551	-0.724138	0.230769	0.6	0.925926	0.692308	0.142857		0
																		0.978261	0.69697	0.916667	0.969605	0.88	0.555556	0.393939	-0.466667	-0.8	-0.333333	0.25	0.5	0.857143	-0.545454	-0.285714	-0.6	0.473684	0.666667	0.882353	0.0163934	-0.368421	0	-0.909091	0.877551	-0.724138	0.230769	0.6	0.925926	0.692308	0.142857		0
																		0.978261	0.69697	0.916667	0.969605	0.88	0.555556	0.393939	-0.466667	-0.8	-0.333333	0.25	0.5	0.857143	-0.545454	-0.285714	-0.6	0.480519	0.666667	0.882353	0.0163934	-0.368421	0	-0.909091	0.877551	-0.724138	0.230769	0.6	0.925926	0.692308	0.142857		0
																		0.978261	0.69697	0.916667	0.969605	0.88	0.555556	0.393939	-0.466667	-0.8	-0.333333	0.25	0.5	0.857143	-0.545454	-0.285714	-0.6	0.480519	0.666667	0.882353	0.0163934	-0.368421	0	-0.909091	0.877551	-0.724138	0.230769	0.6	0.925926	0.692308	0.142857		0
																		0.978261	0.69697	0.916667	0.969605	0.88	0.555556	0.393939	-0.466667	-0.8	-0.333333	0.25	0.5	0.857143	-0.545454	-0.285714	-0.6	0.480519	0.666667	0.882353	0.0163934	-0.368421	0	-0.909091	0.877551	-0.724138	0.230769	0.6	0.925926	0.692308	0.142857		0
																		0.978261	0.69697	0.916667	0.969605	0.882353	0.555556	0.393939	-0.466667	-0.8	-0.333333	0.25	0.5	0.857143	-0.545454	-0.285714	-0.6	0.480519	0.666667	0.882353	0.0163934	-0.368421	0	-0.909091	0.877551	-0.724138	0.230769	0.6	0.925926	0.692308	0.142857		0
																		0.978261	0.69697	0.916667	0.969605	0.882353	0.555556	0.393939	-0.466667	-0.8	-0.333333	0.25	0.5	0.857143	-0.545454	-0.285714	-0.6	0.480519	0.666667	0.882353	0.0163934	-0.368421	0	-0.909091	0.877551	-0.724138	0.230769	0.6	0.925926	0.692308	0.142857		0
																		0.978261	0.69697	0.916667	0.969605	0.882353	0.555556	0.393939	-0.466667	-0.8	-0.333333	0.25	0.5	0.857143	-0.545454	-0.285714	-0.6	0.480519	0.666667	0.882353	0.0163934	-0.368421	0	-0.909091	0.877551	-0.724138	0.230769	0.6	0.925926	0.692308	0.142857		0
																		0.978261	0.69697	0.916667	0.969605	0.882353	0.555556	0.393939	-0.466667	-0.8	-0.333333	0.25	0.5	0.857143	-0.545454	-0.285714	-0.6	0.480519	0.666667	0.882353	0.0163934	-0.368421	0	-0.909091	0.877551	-0.724138	0.230769	0.6	0.925926	0.692308	0.142857		0
																		0.978261	0.69697	0.916667	0.969605	0.882353	0.555556	0.393939	-0.466667	-0.8	-0.333333	0.25	0.5	0.857143	-0.545454	-0.285714	-0.6	0.480519	0.666667	0.882353	0.0163934	-0.368421	0	-0.909091	0.877551	-0.724138	0.230769	0.6	0.925926	0.692308	0.142857		0
																		0.978261	0.69697	0.916667	0.969605	0.882353	0.555556	0.393939	-0.466667	-0.8	-0.333333	0.25	0.5	0.857143	-0.545454	-0.285714	-0.6	0.480519	0.666667	0.882353	0.0163934	-0.368421	0	-0.909091	0.877551	-0.724138	0.230769	0.6	0.925926	0.692308	0.142857		0
																		0.978261	0.69697	0.916667	0.969605	0.882353	0.555556	0.393939	-0.466667	-0.8	-0.333333	0.25	0.5	0.857143	-0.545454	-0.285714	-0.6	0.480519	0.666667	0.882353	0.0163934	-0.368421	0	-0.909091	0.877551	-0.724138	0.230769	0.6	0.925926	0.692308	0.142857		0
																		0.978261	0.69697	0.916667	0.969605	0.884615	0.555556	0.393939	-0.466667	-0.8	-0.333333	0.2	0.5	0.857143	-0.545454	-0.285714	-0.6	0.480519	0.666667	0.6	0.0163934	-0.368421	0	-0.909091	0.877551	-0.724138	0.230769	0.6	0.925926	0.692308	0.142857		0
																		0.978261	0.69697	0.916667	0.969605	0.884615	0.555556	0.393939	-0.466667	-0.8	-0.333333	0.2	0.5	0.857143	-0.545454	-0.285714	-0.6	0.480519	0.666667	0.28	0.0163934	-0.368421	0	-0.909091	0.877551	-0.724138	0.230769	0.6	0.925926	0.692308	0.142857		0
																		0.978261	0.69697	0.916667	0.969605	0.884615	0.555556	0.393939	-0.466667	-0.8	-0.333333	0.2	0.5	0.857143	-0.545454	-0.285714	-0.6	0.480519	0.666667	0.28	0.0163934	-0.368421	0	-0.909091	0.877551	-0.724138	0.230769	0.6	0.925926	0.692308	0.142857		0
																		0.978261	0.69697	0.916667	0.969605	0.884615	0.555556	0.393939	-0.466667	-0.8	-0.333333	0.2	0.5	0.857143	-0.545454	-0.285714	-0.6	0.480519	0.666667	0.230769	0.0163934	-0.368421	0	-0.909091	0.877551	-0.724138	0.230769	0.6	0.925926	0.692308	0.142857		0
																		0.978261	0.69697	0.916667	0.969605	0.884615	0.555556	0.393939	-0.466667	-0.8	-0.333333	0.2	0.5	0.857143	-0.545454	-0.285714	-0.6	0.480519	0.666667	0.230769	0.0163934	-0.368421	0	-0.909091	0.877551	-0.724138	0.230769	0.6	0.925926	0.692308	0.142857		0
																		0.978261	0.69697	0.916667	0.969605	0.884615	0.555556	0.277778	-0.466667	-0.8	-0.333333	0.2	0.5	0.857143	-0.545454	-0.285714	-0.6	0.480519	0.666667	0.230769	0.0163934	-0.368421	0	-0.909091	0.877551	-0.724138	0.230769	0.6	0.925926	0.692308	0.142857		0
																		0.978261	0.69697	0.916667	0.969605	0.884615	0.555556	0.0697674	-0.466667	-0.8	-0.333333	0.2	0.5	0.857143	-0.545454	-0.285714	-0.6	0.480519	0.666667	0.230769	0.0163934	-0.368421	0	-0.909091	0.877551	-0.724138	0.230769	0.6	0.925926	0.692308	0.142857		0
																		0.978261	0.69697	0.916667	0.969605	0.884615	0.555556	-0.115385	-0.466667	-0.8	-0.333333	0.2	0.5	0.857143	-0.545454	-0.285714	-0.6	0.480519	0.666667	0.230769	0.0163934	-0.368421	0	-0.909091	0.877551	-0.724138	0.230769	0.6	0.925926	0.692308	0.142857		0
																		0.978261	0.69697	0.916667	0.969605	0.884615	0.555556	-0.233333	-0.466667	-0.8	-0.333333	0.2	0.5	0.857143	-0.545454	-0.285714	-0.6	0.480519	0.666667	0.230769	0.0163934	-0.368421	0	-0.909091	0.877551	-0.724138	0	0.6	0.925926	0.692308	0.142857		0
																		0.978261	0.69697	0.916667	0.969605	0.884615	0.555556	-0.269841	-0.466667	-0.8	-0.333333	0.2	0.5	0.857143	-0.545454	-0.285714	-0.6	0.480519	0.666667	0.230769	0.0163934	-0.368421	0	-0.909091	0.877551	-0.724138	-0.030303	0.6	0.925926	0.692308	0.142857		0
																		0.978261	0.69697	0.916667	0.969605	0.884615	0.555556	-0.333333	-0.466667	-0.8	-0.333333	0.2	0.5	0.857143	-0.545454	-0.285714	-0.6	0.480519	0.666667	0.230769	0.0163934	-0.368421	0	-0.909091	0.877551	-0.724138	-0.030303	0.6	0.925926	0.692308	0.142857		0
																		0.978261	0.69697	0.916667	0.969605	0.884615	0.555556	-0.378378	-0.466667	-0.8	-0.333333	0.2	0.5	0.857143	-0.545454	-0.285714	-0.6	0.480519	0.666667	0.230769	0.0163934	-0.368421	0	-0.909091	0.877551	-0.724138	-0.030303	0.6	0.925926	0.692308	0.142857		0
																		0.978261	0.69697	0.916667	0.969605	0.884615	0.555556	-0.386667	-0.466667	-0.8	-0.333333	0.2	0.5	0.857143	-0.545454	-0.285714	-0.6	0.480519	0.666667	0.230769	0.0163934	-0.368421	0	-0.909091	0.877551	-0.733333	-0.030303	0.6	0.925926	0.692308	0.142857		0
																		0.978261	0.69697	0.916667	0.969605	0.884615	0.555556	-0.386667	-0.466667	-0.8	-0.333333	0.2	0.5	0.857143	-0.545454	-0.285714	-0.6	0.480519	0.666667	0.230769	0.0163934	-0.368421	0	-0.909091	0.877551	-0.733333	-0.030303	0.6	0.925926	0.692308	0.142857		0
																		0.978261	0.69697	0.916667	0.969605	0.884615	0.555556	-0.386667	-0.466667	-0.8	-0.333333	0.2	0.5	0.857143	-0.545454	-0.285714	-0.6	0.480519	0.666667	0.230769	0.0163934	-0.368421	0	-0.909091	0.877551	-0.733333	-0.030303	0.6	0.925926	0.692308	0.142857		0
																		0.978261	0.69697	0.916667	0.969605	0.884615	0.555556	-0.386667	-0.1	-0.8	-0.333333	0.2	0.5	0.857143	-0.545454	-0.285714	-0.6	0.480519	0.666667	0.230769	0.0163934	-0.368421	0	-0.909091	0.877551	-0.733333	-0.030303	0.6	0.925926	0.692308	0.142857		0
																		0.978261	0.69697	0.916667	0.969605	0.884615	0.555556	-0.386667	0.0434783	-0.8	-0.333333	0.2	0.5	0.857143	-0.545454	-0.285714	-0.6	0.480519	0.666667	0.230769	0.0163934	-0.368421	0	-0.909091	0.877551	-0.733333	-0.030303	0.6	0.925926	0.692308	0.142857		0
																		0.978261	0.69697	0.916667	0.969605	0.884615	0.555556	-0.386667	0.0833333	-0.8	-0.333333	0.2	0.5	0.857143	-0.545454	-0.285714	-0.6	0.480519	0.666667	0.230769	0.0163934	-0.368421	0	-0.909091	0.877551	-0.733333	-0.030303	0.6	0.925926	0.692308	0.142857		0
																		0.978261	0.69697	0.916667	0.969605	0.884615	0.555556	-0.386667	0.185185	-0.8	-0.333333	0.2	0.5	0.857143	-0.545454	-0.285714	-0.6	0.480519	0.666667	0.230769	0.0163934	-0.368421	0	-0.909091	0.877551	-0.741935	-0.030303	0.6	0.925926	0.692308	0.142857		0
																		0.978261	0.69697	0.916667	0.969605	0.884615	0.6	-0.386667	0.352941	-0.8	-0.333333	0.2	0.5	0.857143	-0.545454	-0.285714	-0.6	0.480519	0.666667	0.230769	0.0163934	-0.368421	0	-0.909091	0.877551	-0.741935	-0.030303	0.6	0.925926	0.692308	0.142857		0
																		0.978261	0.69697	0.916667	0.969605	0.884615	0.6	-0.386667	0.476191	-0.8	-0.333333	0.2	0.5	0.857143	-0.545454	-0.285714	-0.6	0.480519	0.666667	0.230769	0.0163934	-0.368421	0	-0.909091	0.877551	-0.741935	-0.030303	0.6	0.925926	0.692308	0.142857		0
																		0.978261	0.69697	0.916667	0.969605	0.884615	0.6	-0.386667	0.488372	-0.8	-0.333333	0.2	0.5	0.857143	-0.545454	-0.285714	-0.6	0.480519	0.666667	0.230769	0.0163934	-0.368421	0	-0.909091	0.877551	-0.741935	-0.030303	0.6	0.925926	0.692308	0.142857		0
																		0.978261	0.69697	0.916667	0.969605	0.884615	0.6	-0.386667	0.488372	-0.8	-0.333333	0.2	0.5	0.857143	-0.545454	-0.285714	-0.6	0.480519	0.666667	0.230769	0.0163934	-0.4	0	-0.909091	0.877551	-0.741935	-0.030303	0.6	0.925926	0.692308	0.142857		0
																		0.978261	0.69697	0.916667	0.969605	0.884615	0.6	-0.402597	0.488372	-0.8	-0.333333	0.2	0.5	0.857143	-0.545454	-0.285714	-0.6	0.480519	0.666667	0.230769	0.0163934	-0.4	0	-0.909091	0.877551	-0.741935	-0.030303	0.6	0.925926	0.692308	0.142857		0
																		0.978261	0.69697	0.916667	0.969605	0.884615	0.6	-0.425	0.488372	-0.8	-0.333333	0.2	0.5	0.857143	-0.545454	-0.285714	-0.6	0.480519	0.666667	0.230769	0.0163934	-0.4	0	-0.909091	0.877551	-0.741935	-0.030303	0.6	0.925926	0.692308	0.142857		0
																		0.978261	0.69697	0.916667	0.969605	0.884615	0.6	-0.425	0.488372	-0.8	-0.333333	0.2	0.5	0.857143	-0.545454	-0.285714	-0.6	0.480519	0.666667	0.230769	0.0163934	-0.4	0	-0.909091	0.877551	-0.741935	-0.030303	0.6	0.925926	0.692308	0.142857		0
																		0.978261	0.69697	0.916667	0.969605	0.886792	0.6	-0.425	0.488372	-0.8	-0.333333	0.2	0.5	0.857143	-0.545454	-0.285714	-0.6	0.480519	0.666667	0.230769	0.0163934	-0.4	0	-0.909091	0.877551	-0.741935	-0.030303	0.6	0.925926	0.692308	0.142857		0
																		0.978261	0.69697	0.916667	0.969605	0.886792	0.6	-0.425	0.488372	-0.8	-0.333333	0.2	0.5	0.857143	-0.545454	-0.285714	-0.6	0.480519	0.666667	0.230769	0.0163934	-0.4	0	-0.909091	0.877551	-0.741935	-0.030303	0.6	0.925926	0.692308	0.142857		0
																		0.978261	0.69697	0.916667	0.969605	0.886792	0.6	-0.425	0.488372	-0.8	-0.333333	0.2	0.5	0.857143	-0.545454	-0.285714	-0.6	0.480519	0.666667	0.230769	0.0163934	-0.4	0	-0.909091	0.877551	-0.741935	-0.030303	0.6	0.925926	0.692308	0.142857		0
																		0.978261	0.69697	0.916667	0.969605	0.886792	0.6	-0.425	0.488372	-0.8	-0.333333	0.2	0.5	0.857143	-0.545454	-0.285714	-0.6	0.480519	0.666667	0.230769	0.0163934	-0.4	0	-0.909091	0.877551	-0.741935	-0.030303	0.6	0.925926	0.692308	0.142857		0
																		0.978261	0.69697	0.916667	0.969605	0.886792	0.6	-0.425	0.488372	-0.8	-0.333333	0.2	0.5	0.857143	-0.545454	-0.285714	-0.6	0.480519	0.666667	0.230769	0.0163934	-0.4	0	-0.909091	0.877551	-0.741935	-0.030303	0.6	0.925926	0.692308	0.142857		0
																		0.978261	0.69697	0.916667	0.969605	0.886792	0.6	-0.425	0.488372	-0.8	-0.333333	0.2	0.5	0.857143	-0.545454	-0.285714	-0.6	0.480519	0.666667	0.230769	0.0163934	-0.4	0	-0.909091	0.877551	-0.741935	-0.030303	0.6	0.925926	0.692308	0.142857		0
																		0.978261	0.69697	0.916667	0.969605	0.886792	0.6	-0.425	0.488372	-0.8	-0.333333	0.2	0.5	0.857143	-0.545454	-0.285714	-0.6	0.480519	0.666667	0.230769	0.0163934	-0.4	0	-0.909091	0.877551	-0.757576	-0.030303	0.6	0.925926	0.692308	0.142857		0
																		0.978261	0.69697	0.916667	0.969605	0.886792	0.6	-0.425	0.488372	-0.8	-0.333333	0.2	0.5	0.857143	-0.545454	-0.285714	-0.6	0.480519	0.666667	0.230769	0.0163934	-0.4	0	-0.909091	0.877551	-0.757576	-0.030303	0.6	0.925926	0.692308	0.142857		0
																		0.978261	0.69697	0.916667	0.969605	0.886792	0.6	-0.425	0.488372	-0.8	-0.333333	0.2	0.5	0.857143	-0.545454	-0.285714	-0.6	0.480519	0.666667	0.230769	0.0163934	-0.4	0	-0.909091	0.877551	-0.757576	-0.030303	0.6	0.925926	0.692308	0.142857		0
																		0.978261	0.69697	0.916667	0.969605	0.886792	0.6	-0.390244	0.391304	-0.8	-0.333333	0.2	0.5	0.857143	-0.545454	-0.285714	-0.6	0.480519	0.666667	0.230769	0.0163934	-0.4	0	-0.909091	0.877551	-0.757576	-0.030303	0.6	0.925926	0.692308	0.142857		0
																		0.978261	0.69697	0.916667	0.969605	0.886792	0.6	-0.390244	0.391304	-0.8	-0.333333	0.2	0.5	0.857143	-0.545454	-0.285714	-0.6	0.480519	0.666667	0.230769	0.0163934	-0.4	0	-0.909091	0.877551	-0.757576	-0.030303	0.6	0.925926	0.692308	0.142857		0
																		0.978261	0.69697	0.916667	0.969605	0.886792	0.6	-0.390244	0.391304	-0.8	-0.333333	0.2	0.5	0.857143	-0.545454	-0.285714	-0.6	0.480519	0.666667	0.230769	0.0163934	-0.4	0	-0.909091	0.877551	-0.757576	-0.030303	0.6	0.925926	0.692308	0.142857		0
																		0.978261	0.69697	0.916667	0.969605	0.886792	0.6	-0.390244	0.391304	-0.8	-0.333333	0.2	0.5	0.857143	-0.545454	-0.285714	-0.6	0.480519	0.666667	0.230769	0.0163934	-0.428571	0	-0.909091	0.877551	-0.757576	-0.030303	0.6	0.925926	0.692308	0.142857		0
																		0.978261	0.69697	0.916667	0.969605	0.888889	0.6	-0.390244	0.391304	-0.8	-0.333333	0.2	0.5	0.857143	-0.545454	-0.285714	-0.6	0.480519	0.666667	0.230769	0.0163934	-0.428571	0	-0.909091	0.877551	-0.757576	-0.030303	0.6	0.925926	0.692308	0.142857		0
																		0.978261	0.69697	0.916667	0.969605	0.888889	0.6	-0.390244	0.391304	-0.8	-0.333333	0.2	0.5	0.857143	-0.545454	-0.285714	-0.6	0.480519	0.666667	0.230769	0.0163934	-0.428571	0	-0.909091	0.877551	-0.757576	-0.030303	0.6	0.925926	0.692308	0.142857		0
																		0.978261	0.69697	0.916667	0.969605	0.888889	0.6	-0.390244	0.391304	-0.8	-0.333333	0.2	0.5	0.857143	-0.545454	-0.285714	-0.6	0.480519	0.666667	0.230769	0.0163934	-0.428571	0	-0.909091	0.877551	-0.757576	-0.030303	0.6	0.925926	0.692308	0.142857		0
																		0.978261	0.69697	0.916667	0.969605	0.888889	0.6	-0.39759	0.391304	-0.8	-0.333333	0.2	0.5	0.857143	-0.545454	-0.285714	-0.6	0.480519	0.666667	0.230769	0.0163934	-0.428571	0	-0.909091	0.877551	-0.757576	-0.030303	0.6	0.925926	0.692308	0.142857		0
																		0.978261	0.69697	0.916667	0.969605	0.888889	0.6	-0.39759	0.391304	-0.8	-0.333333	0.2	0.5	0.857143	-0.545454	-0.285714	-0.6	0.480519	0.666667	0.230769	0.0163934	-0.428571	0	-0.909091	0.877551	-0.757576	-0.030303	0.6	0.925926	0.692308	0.142857		0
																		0.978261	0.69697	0.916667	0.969605	0.888889	0.6	-0.411765	0.391304	-0.8	-0.333333	0.2	0.5	0.857143	-0.545454	-0.285714	-0.6	0.480519	0.666667	0.230769	0.0163934	-0.428571	0	-0.909091	0.877551	-0.757576	-0.030303	0.6	0.925926	0.692308	0.142857		0
																		0.978261	0.69697	0.916667	0.969605	0.888889	0.6	-0.418605	0.391304	-0.8	-0.333333	0.2	0.5	0.857143	-0.545454	-0.285714	-0.6	0.480519	0.666667	0.230769	0.0163934	-0.428571	0	-0.909091	0.877551	-0.757576	-0.030303	0.6	0.925926	0.692308	0.142857		0
																		0.978261	0.69697	0.916667	0.969605	0.888889	0.6	-0.418605	0.391304	-0.8	-0.333333	0.2	0.5	0.857143	-0.545454	-0.285714	-0.6	0.480519	0.666667	0.230769	0.0163934	-0.428571	0	-0.909091	0.877551	-0.757576	-0.030303	0.6	0.925926	0.692308	0.142857		0
																		0.978261	0.69697	0.916667	0.969697	0.888889	0.6	-0.418605	0.391304	-0.8	-0.333333	0.2	0.5	0.857143	-0.545454	-0.285714	-0.6	0.480519	0.666667	0.230769	0.0163934	-0.428571	0	-0.909091	0.877551	-0.757576	-0.030303	0.6	0.925926	0.692308	0.142857		0
																		0.978261	0.69697	0.916667	0.969697	0.888889	0.6	-0.418605	0.391304	-0.8	-0.333333	0.2	0.5	0.857143	-0.545454	-0.285714	-0.6	0.480519	0.666667	0.230769	0.0163934	-0.428571	0	-0.909091	0.877551	-0.757576	-0.030303	0.6	0.925926	0.692308	0.142857		0
																		0.978261	0.69697	0.916667	0.969697	0.888889	0.6	-0.418605	0.391304	-0.8	-0.333333	0.2	0.5	0.857143	-0.545454	-0.285714	-0.6	0.480519	0.666667	0.230769	0.0163934	-0.428571	0	-0.909091	0.877551	-0.567568	-0.030303	0.6	0.925926	0.692308	0.142857		0
																		0.978261	0.69697	0.916667	0.969697	0.888889	0.6	-0.418605	0.391304	-0.8	-0.333333	0.2	0.5	0.857143	-0.545454	-0.285714	-0.6	0.480519	0.666667	0.230769	0.0163934	-0.428571	0	-0.909091	0.877551	-0.414634	-0.030303	0.6	0.925926	0.692308	0.142857		0
																		0.978261	0.69697	0.916667	0.969697	0.888889	0.6	-0.418605	0.391304	-0.8	-0.333333	0.2	0.5	0.857143	-0.545454	-0.285714	-0.6	0.480519	0.666667	0.230769	0.0163934	-0.428571	0	-0.909091	0.84	-0.318182	-0.030303	0.6	0.925926	0.692308	0.142857		0
																		0.978261	0.69697	0.916667	0.969697	0.888889	0.6	-0.50495	0.391304	-0.8	-0.333333	0.2	0.5	0.857143	-0.545454	-0.285714	-0.6	0.480519	0.666667	0.230769	0.0163934	-0.428571	0	-0.909091	0.84	-0.0357143	-0.030303	0.6	0.925926	0.692308	0.142857		0
																		0.978261	0.69697	0.916667	0.969697	0.888889	0.6	-0.586777	0.391304	-0.8	-0.333333	0.2	0.5	0.857143	-0.545454	-0.285714	-0.6	0.480519	0.666667	0.230769	0.0163934	-0.428571	0	-0.909091	0.84	-0.0175439	-0.030303	0.6	0.925926	0.692308	0.142857		0
																		0.978261	0.69697	0.916667	0.969697	0.888889	0.6	-0.637681	0.391304	-0.8	-0.333333	0.310345	0.5	0.857143	-0.545454	-0.285714	-0.6	0.480519	0.666667	0.230769	0.0163934	-0.428571	0	-0.909091	0.84	-0.0175439	-0.030303	0.6	0.925926	0.692308	0.142857		0
																		0.978261	0.69697	0.916667	0.969697	0.888889	0.6	-0.671053	0.391304	-0.8	-0.333333	0.428571	0.5	0.857143	-0.545454	-0.285714	-0.6	0.480519	0.666667	0.230769	0.0163934	-0.428571	0	-0.909091	0.84	-0.0175439	-0.030303	0.6	0.925926	0.692308	0.142857		0
																		0.978261	0.69697	0.916667	0.969697	0.888889	0.6	-0.689441	0.391304	-0.8	-0.333333	0.487179	0.5	0.857143	-0.545454	-0.285714	-0.6	0.480519	0.666667	0.230769	0.0322581	-0.428571	0	-0.909091	0.84	-0.0175439	-0.030303	0.6	0.925926	0.692308	0.142857		0
																		0.978261	0.69697	0.916667	0.969697	0.888889	0.6	-0.689441	0.391304	-0.8	-0.333333	0.534884	0.5	0.857143	-0.545454	-0.285714	-0.6	0.480519	0.666667	-0.030303	0.104478	-0.428571	0	-0.909091	0.84	-0.0175439	-0.030303	0.6	0.925926	0.692308	0.142857		0
																		0.978261	0.69697	0.916667	0.969697	0.888889	0.6	-0.689441	0.391304	-0.8	-0.333333	0.574468	0.5	0.857143	-0.545454	-0.285714	-0.6	0.480519	0.666667	-0.030303	0.166667	-0.428571	0	-0.909091	0.84	-0.0175439	-0.030303	0.6	0.925926	0.692308	0.142857		0
																		0.978261	0.69697	0.916667	0.969697	0.888889	0.6	-0.691358	0.391304	-0.8	-0.333333	0.574468	0.5	0.857143	-0.545454	-0.285714	-0.6	0.480519	0.666667	-0.030303	0.189189	-0.428571	0	-0.909091	0.84	-0.0175439	-0.030303	0.6	0.925926	0.692308	0.142857		0
																		0.978261	0.69697	0.916667	0.969697	0.888889	0.6	-0.691358	0.391304	-0.8	-0.333333	0.574468	0.5	0.857143	-0.545454	-0.285714	-0.6	0.480519	0.666667	-0.030303	0.189189	-0.428571	0	-0.909091	0.84	-0.0175439	-0.030303	0.6	0.925926	0.692308	0.142857		0
																		0.978261	0.69697	0.916667	0.969697	0.888889	0.6	-0.691358	0.391304	-0.8	-0.333333	0.574468	0.5	0.857143	-0.545454	-0.285714	-0.6	0.480519	0.666667	-0.030303	0.2	-0.428571	0	-0.909091	0.84	-0.0175439	-0.030303	0.6	0.925926	0.692308	0.142857		0
																		0.978261	0.69697	0.916667	0.969697	0.888889	0.6	-0.691358	0.391304	-0.8	-0.333333	0.574468	0.5	0.857143	-0.545454	-0.285714	-0.6	0.480519	0.666667	-0.030303	0.2	-0.428571	0	-0.909091	0.84	-0.0175439	-0.030303	0.6	0.925926	0.692308	0.142857		0
																		0.978261	0.69697	0.916667	0.969697	0.888889	0.6	-0.691358	0.391304	-0.8	-0.333333	0.574468	0.5	0.857143	-0.545454	-0.285714	-0.6	0.480519	0.666667	-0.030303	0.2	-0.428571	0	-0.909091	0.84	-0.0175439	-0.030303	0.6	0.925926	0.692308	0.142857		0
																		0.978261	0.69697	0.916667	0.969697	0.888889	0.6	-0.691358	0.391304	-0.8	-0.333333	0.574468	0.5	0.857143	-0.545454	-0.285714	-0.6	0.480519	0.666667	-0.030303	0.2	-0.428571	0	-0.909091	0.84	-0.0175439	-0.030303	0.6	0.925926	0.692308	0.142857		0
																		0.978261	0.69697	0.916667	0.969697	0.888889	0.6	-0.691358	0.391304	-0.8	-0.333333	0.574468	0.5	0.857143	-0.545454	-0.285714	-0.6	0.480519	0.666667	-0.030303	0.2	-0.428571	0	-0.909091	0.84	-0.0175439	-0.030303	0.6	0.925926	0.692308	0.142857		0
																		0.978261	0.69697	0.916667	0.969697	0.888889	0.6	-0.691358	0.428571	-0.8	-0.333333	0.574468	0.5	0.857143	-0.545454	-0.285714	-0.6	0.461539	0.666667	-0.030303	0.2	-0.428571	0	-0.909091	0.84	-0.0175439	-0.030303	0.6	0.925926	0.692308	0.142857		0
																		0.978261	0.69697	0.916667	0.969697	0.888889	0.6	-0.691358	0.44	-0.8	-0.333333	0.574468	0.5	0.857143	-0.545454	-0.285714	-0.6	0.461539	0.666667	-0.030303	0.2	-0.428571	0	-0.909091	0.84	-0.0175439	-0.030303	0.6	0.925926	0.692308	0.142857		0
																		0.978261	0.69697	0.916667	0.969697	0.888889	0.6	-0.691358	0.44	-0.8	-0.333333	0.574468	0.5	0.857143	-0.545454	-0.285714	-0.6	0.461539	0.666667	-0.030303	0.2	-0.428571	0	-0.909091	0.84	-0.0175439	-0.030303	0.6	0.925926	0.692308	0.142857		0
																		0.978261	0.69697	0.916667	0.969697	0.888889	0.6	-0.691358	0.44	-0.8	-0.333333	0.574468	0.5	0.857143	-0.565217	-0.285714	-0.6	0.461539	0.666667	-0.030303	0.2	-0.428571	0	-0.909091	0.84	-0.0175439	-0.030303	0.6	0.925926	0.692308	0.142857		0
																		0.978261	0.69697	0.916667	0.969697	0.888889	0.6	-0.693252	0.44	-0.8	-0.333333	0.574468	0.5	0.857143	-0.565217	-0.285714	-0.6	0.461539	0.666667	-0.030303	0.2	-0.428571	0	-0.909091	0.84	-0.0175439	-0.030303	0.6	0.925926	0.692308	0.142857		0
																		0.978261	0.69697	0.916667	0.969697	0.888889	0.6	-0.695122	0.44	-0.8	-0.333333	0.574468	0.5	0.857143	-0.565217	-0.285714	-0.6	0.461539	0.666667	-0.030303	0.2	-0.428571	0	-0.909091	0.84	-0.0175439	-0.030303	0.6	0.925926	0.692308	0.142857		0
																		0.978261	0.69697	0.916667	0.969697	0.888889	0.6	-0.695122	0.44	-0.8	-0.333333	0.574468	0.5	0.857143	-0.565217	-0.285714	-0.6	0.461539	0.666667	-0.030303	0.2	-0.428571	0	-0.909091	0.84	-0.0175439	-0.030303	0.6	0.925926	0.692308	0.142857		0
																		0.978261	0.69697	0.916667	0.969697	0.888889	0.6	-0.700599	0.44	-0.8	-0.333333	0.574468	0.5	0.857143	-0.565217	-0.285714	-0.6	0.461539	0.666667	-0.030303	0.2	-0.428571	0	-0.909091	0.84	-0.0175439	-0.030303	0.6	0.925926	0.692308	0.142857		0
																		0.978261	0.69697	0.916667	0.969697	0.888889	0.6	-0.704142	0.44	-0.8	-0.333333	0.574468	0.5	0.857143	-0.565217	-0.285714	-0.6	0.461539	0.666667	-0.030303	0.2	-0.428571	0	-0.909091	0.84	-0.0175439	-0.030303	0.6	0.925926	0.692308	0.142857		0
																		0.978261	0.69697	0.916667	0.969697	0.888889	0.6	-0.715909	0.44	-0.8	-0.333333	0.574468	0.5	0.857143	-0.565217	-0.285714	-0.6	0.487805	0.666667	-0.030303	0.2	-0.428571	0	-0.909091	0.84	-0.0175439	-0.030303	0.6	0.925926	0.692308	0.142857		0
																		0.978261	0.69697	0.916667	0.969697	0.888889	0.6	-0.72067	0.44	-0.8	-0.333333	0.574468	0.6	0.857143	-0.565217	-0.285714	-0.6	0.511628	0.666667	-0.030303	0.2	-0.428571	0	-0.909091	0.84	-0.0175439	-0.030303	0.6	0.925926	0.692308	0.142857		0
																		0.978261	0.69697	0.916667	0.969697	0.888889	0.6	-0.726776	0.44	-0.8	-0.333333	0.574468	0.6	0.857143	-0.565217	-0.285714	-0.6	0.533333	0.666667	-0.030303	0.2	-0.428571	0	-0.909091	0.84	-0.0175439	-0.030303	0.6	0.925926	0.692308	0.142857		0
																		0.978261	0.69697	0.916667	0.969697	0.888889	0.6	-0.73262	0.44	-0.8	-0.333333	0.574468	0.6	0.857143	-0.565217	-0.285714	-0.6	0.557895	0.666667	-0.030303	0.2	-0.428571	0	-0.909091	0.84	-0.0175439	-0.030303	0.6	0.925926	0.692308	0.142857		0
																		0.978261	0.69697	0.916667	0.969697	0.888889	0.6	-0.73545	0.44	-0.8	-0.333333	0.574468	0.6	0.857143	-0.565217	-0.285714	-0.6	0.557895	0.666667	-0.030303	0.2	-0.428571	0	-0.909091	0.84	-0.0175439	-0.030303	0.6	0.925926	0.692308	0.142857		0
																		0.978261	0.69697	0.916667	0.969697	0.888889	0.6	-0.736842	0.44	-0.8	-0.333333	0.574468	0.6	0.857143	-0.565217	-0.285714	-0.6	0.5625	0.666667	-0.030303	0.2	-0.428571	0	-0.909091	0.84	-0.0175439	-0.030303	0.6	0.925926	0.692308	0.142857		0
																		0.978261	0.69697	0.916667	0.969697	0.888889	0.6	-0.73822	0.44	-0.8	-0.333333	0.574468	0.6	0.857143	-0.565217	-0.285714	-0.6	0.5625	0.666667	-0.030303	0.2	-0.428571	0	-0.909091	0.84	-0.0175439	-0.030303	0.6	0.925926	0.692308	0.142857		0
																		0.978261	0.69697	0.916667	0.969697	0.888889	0.6	-0.74359	0.44	-0.8	-0.333333	0.574468	0.6	0.857143	-0.565217	-0.285714	-0.6	0.5625	0.666667	-0.030303	0.2	-0.428571	0	-0.909091	0.84	-0.0175439	-0.030303	0.6	0.925926	0.692308	0.142857		0
																		0.978261	0.69697	0.916667	0.969697	0.888889	0.6	-0.744898	0.44	-0.8	-0.333333	0.574468	0.6	0.857143	-0.565217	-0.285714	-0.6	0.5625	0.666667	-0.030303	0.2	-0.428571	0	-0.909091	0.84	-0.0175439	-0.030303	0.6	0.925926	0.692308	0.142857		0
																		0.978261	0.69697	0.916667	0.969697	0.890909	0.6	-0.744898	0.44	-0.8	-0.333333	0.574468	0.6	0.857143	-0.565217	-0.285714	-0.6	0.5625	0.666667	-0.030303	0.2	-0.428571	0	-0.909091	0.84	-0.0175439	-0.030303	0.6	0.925926	0.692308	0.142857		0
																		0.978261	0.69697	0.916667	0.969697	0.890909	0.6	-0.744898	0.44	-0.8	0	0.574468	0.6	0.857143	-0.565217	-0.285714	-0.6	0.5625	0.666667	-0.030303	0.2	-0.428571	0	-0.909091	0.84	-0.0175439	-0.030303	0.6	0.925926	0.692308	0.142857		0
																		0.978261	0.69697	0.916667	0.969697	0.890909	0.6	-0.744898	0.44	-0.8	0	0.574468	0.6	0.857143	-0.565217	-0.285714	-0.6	0.5625	0.666667	-0.030303	0.2	-0.428571	0	-0.909091	0.84	-0.0175439	-0.030303	0.6	0.925926	0.692308	0.142857		0
																		0.978261	0.69697	0.916667	0.969697	0.890909	0.6	-0.744898	0.44	-0.8	0	0.574468	0.6	0.857143	-0.565217	-0.285714	-0.6	0.5625	0.666667	-0.030303	0.2	-0.428571	0	-0.909091	0.84	-0.0175439	-0.030303	0.6	0.925926	0.692308	0.142857		0
																		0.978261	0.69697	0.916667	0.969697	0.890909	0.6	-0.746193	0.44	-0.8	0	0.574468	0.6	0.866667	-0.565217	-0.285714	-0.6	0.546392	0.666667	-0.030303	0.2	-0.428571	0	-0.909091	0.84	-0.0175439	-0.030303	0.6	0.925926	0.692308	0.142857		0
																		0.978261	0.69697	0.916667	0.969697	0.890909	0.6	-0.751244	0.44	-0.8	0	0.574468	0.6	0.866667	-0.565217	-0.285714	-0.6	0.546392	0.666667	-0.030303	0.2	-0.428571	0	-0.909091	0.84	0.09375	-0.030303	0.6	0.925926	0.692308	0.142857		0
																		0.978261	0.69697	0.916667	0.969697	0.890909	0.6	-0.751244	0.44	-0.8	0	0.574468	0.6	0.866667	-0.565217	-0.285714	-0.6	0.546392	0.666667	-0.030303	0.2	-0.428571	0	-0.909091	0.84	0.121212	-0.030303	0.6	0.925926	0.692308	0.142857		0
																		0.978261	0.69697	0.916667	0.969697	0.890909	0.6	-0.760766	0.44	-0.8	0	0.574468	0.6	0.866667	-0.565217	-0.285714	-0.6	0.546392	0.666667	-0.030303	0.2	-0.428571	0	-0.909091	0.84	0.121212	-0.030303	0.6	0.925926	0.692308	0.142857		0
																		0.978261	0.69697	0.916667	0.969697	0.890909	0.6	-0.765258	0.44	-0.8	0	0.574468	0.6	0.866667	-0.565217	-0.285714	-0.6	0.546392	0.666667	-0.030303	0.2	-0.428571	0	-0.909091	0.84	0.121212	-0.030303	0.6	0.925926	0.692308	0.142857		0
																		0.978261	0.69697	0.916667	0.969697	0.890909	0.6	-0.766355	0.44	-0.8	0	0.574468	0.6	0.866667	-0.565217	-0.285714	-0.6	0.546392	0.666667	-0.030303	0.2	-0.428571	0	-0.909091	0.84	0.121212	-0.030303	0.6	0.925926	0.692308	0.142857		0
																		0.978261	0.69697	0.916667	0.969697	0.890909	0.6	-0.766355	0.44	-0.8	0	0.574468	0.6	0.866667	-0.565217	-0.285714	-0.6	0.546392	0.666667	-0.030303	0.2	-0.428571	0	-0.909091	0.84	0.121212	-0.030303	0.6	0.925926	0.692308	0.142857		0
																		0.978261	0.69697	0.916667	0.969697	0.890909	0.6	-0.77169	0.44	-0.8	0	0.574468	0.6	0.866667	-0.565217	-0.285714	-0.6	0.546392	0.666667	-0.030303	0.2	-0.428571	0	-0.909091	0.84	0.121212	-0.030303	0.6	0.925926	0.692308	0.142857		0
																		0.978261	0.69697	0.916667	0.969697	0.890909	0.6	-0.778761	0.44	-0.8	0	0.574468	0.6	0.866667	-0.565217	-0.285714	-0.6	0.546392	0.666667	-0.030303	0.2	-0.428571	0	-0.909091	0.84	0.121212	-0.030303	0.6	0.925926	0.692308	0.142857		0
																		0.978261	0.69697	0.916667	0.969697	0.890909	0.6	-0.778761	0.44	-0.8	0	0.574468	0.6	0.866667	-0.565217	-0.285714	-0.6	0.546392	0.666667	-0.030303	0.2	-0.428571	0	-0.909091	0.84	0.121212	-0.030303	0.6	0.925926	0.692308	0.142857		0
																		0.978261	0.69697	0.916667	0.969697	0.890909	0.6	-0.785408	0.44	-0.8	0	0.574468	0.6	0.866667	-0.565217	-0.285714	-0.6	0.546392	0.666667	-0.030303	0.2	-0.428571	0	-0.909091	0.84	0.121212	-0.030303	0.6	0.925926	0.692308	0.142857		0
																		0.978261	0.69697	0.916667	0.969697	0.890909	0.6	-0.790795	0.44	-0.8	0	0.574468	0.6	0.866667	-0.565217	-0.285714	-0.6	0.546392	0.666667	-0.030303	0.2	-0.428571	0	-0.909091	0.84	0.121212	-0.030303	0.6	0.925926	0.692308	0.142857		0
																		0.978261	0.69697	0.916667	0.969697	0.890909	0.6	-0.797571	0.44	-0.8	0	0.574468	0.6	0.866667	-0.565217	-0.285714	-0.6	0.546392	0.666667	-0.030303	0.2	-0.428571	0	-0.909091	0.84	0.121212	-0.030303	0.6	0.925926	0.692308	0.142857		0
																		0.978261	0.69697	0.916667	0.969697	0.890909	0.6	-0.800797	0.44	-0.8	0	0.574468	0.6	0.866667	-0.565217	-0.285714	-0.6	0.546392	0.666667	-0.030303	0.2	-0.428571	0	-0.909091	0.84	0.121212	-0.030303	0.6	0.925926	0.692308	0.142857		0
																		0.978261	0.69697	0.916667	0.969697	0.890909	0.6	-0.80695	0.44	-0.8	0	0.574468	0.6	0.866667	-0.565217	-0.285714	-0.6	0.546392	0.666667	-0.030303	0.2	-0.428571	0	-0.909091	0.84	0.121212	-0.030303	0.6	0.925926	0.692308	0.142857		0
																		0.978261	0.69697	0.916667	0.969697	0.890909	0.6	-0.81203	0.44	-0.8	0	0.574468	0.6	0.866667	-0.565217	-0.285714	-0.6	0.546392	0.666667	-0.030303	0.2	-0.428571	0	-0.909091	0.84	0.121212	-0.030303	0.6	0.925926	0.692308	0.142857		0
																		0.978261	0.69697	0.916667	0.969697	0.890909	0.6	-0.81203	0.411765	-0.8	0	0.574468	0.6	0.866667	-0.565217	-0.285714	-0.6	0.546392	0.666667	-0.030303	0.2	-0.428571	0	-0.909091	0.84	0.121212	-0.030303	0.6	0.925926	0.692308	0.142857		0
																		0.978261	0.69697	0.916667	0.969697	0.890909	0.6	-0.818841	0.411765	-0.8	0	0.574468	0.6	0.866667	-0.565217	-0.285714	-0.6	0.546392	0.666667	-0.030303	0.2	-0.428571	0	-0.909091	0.84	0.121212	-0.030303	0.6	0.925926	0.692308	0.142857		0
																		0.978261	0.69697	0.916667	0.969697	0.890909	0.6	-0.82699	0.411765	-0.8	0	0.574468	0.6	0.866667	-0.565217	-0.285714	-0.6	0.546392	0.666667	-0.030303	0.2	-0.428571	0	-0.909091	0.84	0.121212	-0.030303	0.6	0.925926	0.692308	0.142857		0
																		0.978261	0.69697	0.916667	0.969697	0.890909	0.6	-0.83165	0.411765	-0.8	0	0.574468	0.6	0.866667	-0.565217	-0.285714	-0.6	0.546392	0.666667	-0.030303	0.2	-0.428571	0	-0.909091	0.84	0.121212	-0.030303	0.6	0.925926	0.692308	0.142857		0
																		0.978261	0.69697	0.916667	0.969697	0.890909	0.6	-0.83871	0.411765	-0.833333	0	0.574468	0.6	0.866667	-0.565217	-0.2	-0.6	0.546392	0.666667	-0.030303	0.2	-0.428571	0	-0.909091	0.84	0.121212	-0.030303	0.6	0.925926	0.692308	0.142857		0
																		0.978261	0.69697	0.916667	0.969697	0.890909	0.6	-0.84326	0.411765	-0.888889	0	0.510204	0.6	0.866667	-0.565217	-0.2	-0.6	0.546392	0.666667	-0.030303	0.2	-0.428571	0	-0.909091	0.84	0.121212	-0.030303	0.6	0.925926	0.692308	0.142857		0
																		0.978261	0.69697	0.916667	0.969697	0.890909	0.6	-0.849398	0.411765	-0.923077	0	0.510204	0.6	0.866667	-0.565217	-0.2	-0.6	0.546392	0.666667	-0.030303	0.2	-0.428571	0	-0.909091	0.84	0.121212	-0.030303	0.6	0.925926	0.692308	0.142857		0
																		0.978261	0.69697	0.916667	0.969697	0.890909	0.6	-0.853801	0.411765	-0.933333	0	0.510204	0.6	0.866667	-0.565217	-0.2	-0.6	0.546392	0.666667	-0.030303	0.2	-0.428571	0	-0.909091	0.84	0.121212	-0.030303	0.6	0.925926	0.692308	0.142857		0
																		0.978261	0.69697	0.916667	0.969697	0.890909	0.6	-0.859155	0.411765	-0.935484	0	0.510204	0.6	0.866667	-0.565217	-0.2	-0.666667	0.546392	0.666667	-0.030303	0.2	-0.428571	0	-0.909091	0.84	0.121212	-0.030303	0.6	0.925926	0.692308	0.142857		0
																		0.978261	0.69697	0.916667	0.969697	0.890909	0.6	-0.865229	0.411765	-0.9375	0	0.510204	0.6	0.866667	-0.565217	-0.2	-0.666667	0.546392	0.666667	-0.030303	0.2	-0.428571	0	-0.909091	0.84	0.121212	-0.030303	0.6	0.925926	0.692308	0.142857		0
																		0.978261	0.69697	0.916667	0.969697	0.890909	0.6	-0.869452	0.411765	-0.9375	0	0.510204	0.6	0.866667	-0.565217	-0.2	-0.666667	0.546392	0.666667	-0.030303	0.2	-0.428571	0	-0.909091	0.84	0.121212	-0.030303	0.6	0.925926	0.692308	0.142857		0
																		0.978261	0.69697	0.916667	0.969697	0.890909	0.6	-0.870801	0.411765	-0.9375	0	0.510204	0.6	0.866667	-0.565217	-0.2	-0.666667	0.546392	0.666667	-0.030303	0.2	-0.454545	0	-0.909091	0.84	0.121212	-0.030303	0.6	0.925926	0.692308	0.142857		0
																		0.978261	0.69697	0.916667	0.969697	0.890909	0.6	-0.872449	0.411765	-0.9375	0	0.510204	0.6	0.866667	-0.565217	-0.2	-0.666667	0.546392	0.666667	-0.030303	0.2	-0.454545	0	-0.909091	0.84	0.121212	-0.030303	0.6	0.925926	0.692308	0.142857		0
																		0.978261	0.69697	0.916667	0.969697	0.890909	0.6	-0.875	0.411765	-0.9375	0	0.52	0.6	0.866667	-0.565217	-0.2	-0.666667	0.546392	0.666667	-0.030303	0.2	-0.478261	0	-0.909091	0.84	0.121212	-0.030303	0.6	0.925926	0.692308	0.142857		0
																		0.978261	0.69697	0.916667	0.969697	0.890909	0.6	-0.877451	0.411765	-0.9375	0	0.52	0.6	0.866667	-0.565217	-0.2	-0.666667	0.546392	0.666667	-0.030303	0.2	-0.478261	0	-0.909091	0.84	0.121212	-0.030303	0.6	0.925926	0.692308	0.142857		0
																		0.978261	0.69697	0.916667	0.969697	0.890909	0.6	-0.878641	0.411765	-0.9375	0	0.52	0.6	0.866667	-0.565217	-0.2	-0.666667	0.546392	0.666667	-0.030303	0.2	-0.478261	0	-0.909091	0.84	0.134328	-0.030303	0.6	0.925926	0.692308	0.142857		0
																		0.978261	0.69697	0.916667	0.969697	0.890909	0.6	-0.879518	0.411765	-0.9375	0	0.52	0.6	0.866667	-0.565217	-0.2	-0.666667	0.546392	0.666667	-0.030303	0.2	-0.478261	0	-0.909091	0.84	0.134328	-0.030303	0.6	0.925926	0.692308	0.142857		0
																		0.978261	0.69697	0.916667	0.969697	0.890909	0.6	-0.881797	0.411765	-0.9375	0	0.52	0.6	0.866667	-0.565217	-0.2	-0.666667	0.546392	0.666667	-0.030303	0.2	-0.478261	0	-0.909091	0.84	0.134328	-0.030303	0.6	0.925926	0.692308	0.142857		0
																		0.978261	0.69697	0.916667	0.969697	0.890909	0.6	-0.884527	0.411765	-0.9375	0	0.52	0.6	0.866667	-0.565217	-0.2	-0.666667	0.546392	0.666667	-0.030303	0.2	-0.478261	0	-0.909091	0.84	0.134328	-0.030303	0.6	0.925926	0.692308	0.142857		0
																		0.978261	0.69697	0.916667	0.969697	0.890909	0.6	-0.887133	0.411765	-0.9375	0	0.52	0.6	0.866667	-0.565217	-0.25	-0.666667	0.546392	0.666667	-0.030303	0.2	-0.478261	0	-0.909091	0.84	0.134328	-0.030303	0.6	0.925926	0.692308	0.142857		0
																		0.978261	0.69697	0.916667	0.969697	0.890909	0.6	-0.888143	0.411765	-0.9375	0	0.52	0.6	0.866667	-0.583333	-0.25	-0.666667	0.546392	0.666667	-0.030303	0.2	-0.478261	0	-0.909091	0.84	0.134328	-0.030303	0.6	0.925926	0.692308	0.142857		0
																		0.978261	0.69697	0.916667	0.969697	0.890909	0.6	-0.890351	0.411765	-0.9375	0	0.52	0.6	0.866667	-0.583333	-0.25	-0.666667	0.546392	0.666667	-0.030303	0.2	-0.478261	0	-0.909091	0.84	0.134328	-0.030303	0.6	0.925926	0.692308	0.142857		0
																		0.978261	0.69697	0.916667	0.969697	0.890909	0.6	-0.890591	0.411765	-0.9375	0	0.52	0.6	0.866667	-0.583333	-0.25	-0.666667	0.546392	0.666667	-0.030303	0.2	-0.478261	0	-0.909091	0.84	0.134328	-0.030303	0.6	0.925926	0.692308	0.142857		0
																		0.978261	0.69697	0.916667	0.969697	0.890909	0.6	-0.890591	0.411765	-0.9375	0	0.52	0.6	0.866667	-0.583333	-0.25	-0.666667	0.546392	0.666667	-0.030303	0.2	-0.478261	0	-0.909091	0.84	0.134328	-0.030303	0.6	0.925926	0.692308	0.142857		0
																		0.978261	0.69697	0.916667	0.969697	0.890909	0.6	-0.890591	0.411765	-0.9375	0	0.52	0.6	0.866667	-0.583333	-0.25	-0.666667	0.546392	0.666667	-0.030303	0.2	-0.478261	0	-0.909091	0.84	0.134328	-0.030303	0.6	0.925926	0.692308	0.142857		0
																		0.978261	0.69697	0.916667	0.969697	0.892857	0.6	-0.890591	0.411765	-0.9375	0	0.52	0.6	0.866667	-0.583333	-0.25	-0.666667	0.546392	0.666667	-0.030303	0.2	-0.478261	0	-0.909091	0.84	0.134328	-0.030303	0.6	0.925926	0.692308	0.142857		0
																		0.978261	0.69697	0.916667	0.969697	0.892857	0.6	-0.890591	0.411765	-0.9375	0	0.52	0.6	0.866667	-0.583333	-0.25	-0.666667	0.546392	0.666667	-0.030303	0.2	-0.478261	0	-0.909091	0.84	0.134328	-0.030303	0.6	0.925926	0.692308	0.142857		0
																		0.978261	0.69697	0.916667	0.969697	0.892857	0.6	-0.890591	0.411765	-0.9375	0	0.52	0.6	0.866667	-0.583333	-0.25	-0.666667	0.546392	0.666667	-0.030303	0.2	-0.478261	0	-0.909091	0.84	0.134328	-0.030303	0.6	0.925926	0.692308	0.142857		0
																		0.978261	0.69697	0.916667	0.969697	0.892857	0.6	-0.890591	0.411765	-0.9375	0	0.52	0.6	0.866667	-0.583333	-0.25	-0.666667	0.546392	0.666667	-0.030303	0.2	-0.478261	0	-0.909091	0.84	0.134328	-0.030303	0.6	0.925926	0.692308	0.142857		0
																		0.978261	0.69697	0.916667	0.969697	0.892857	0.6	-0.890591	0.411765	-0.9375	0	0.52	0.6	0.866667	-0.583333	-0.25	-0.666667	0.546392	0.666667	-0.030303	0.2	-0.478261	0	-0.909091	0.84	0.134328	-0.030303	0.6	0.925926	0.692308	0.142857		0
																		0.978261	0.69697	0.916667	0.969697	0.892857	0.6	-0.890591	0.411765	-0.9375	0	0.52	0.6	0.866667	-0.583333	-0.25	-0.666667	0.546392	0.666667	-0.030303	0.2	-0.478261	0	-0.909091	0.84	0.134328	-0.030303	0.6	0.925926	0.692308	0.142857		0
																		0.978261	0.69697	0.916667	0.969697	0.892857	0.6	-0.890591	0.411765	-0.9375	0	0.52	0.6	0.866667	-0.461539	-0.25	-0.666667	0.546392	0.666667	-0.030303	0.2	-0.478261	0	-0.909091	0.84	0.134328	-0.030303	0.6	0.925926	0.692308	0.142857		0
																		0.978261	0.69697	0.916667	0.969697	0.892857	0.6	-0.890591	0.411765	-0.9375	0	0.52	0.6	0.866667	-0.461539	-0.25	-0.666667	0.546392	0.666667	-0.030303	0.2	-0.478261	0	-0.909091	0.84	0.134328	-0.030303	0.6	0.925926	0.692308	0.142857		0
																		0.978261	0.69697	0.916667	0.969697	0.894737	0.6	-0.890591	0.411765	-0.9375	0	0.381818	0.6	0.866667	-0.461539	-0.25	-0.666667	0.546392	0.666667	-0.030303	0.2	-0.478261	0	-0.909091	0.84	0.134328	-0.030303	0.6	0.925926	0.692308	0.142857		0
																		0.978261	0.69697	0.916667	0.969697	0.894737	0.6	-0.890591	0.411765	-0.9375	0	0.381818	0.6	0.866667	-0.461539	-0.25	-0.666667	0.546392	0.666667	-0.030303	0.2	-0.478261	0	-0.909091	0.84	0.134328	-0.030303	0.6	0.925926	0.692308	0.142857		0
																		0.978261	0.69697	0.916667	0.969697	0.894737	0.6	-0.890591	0.411765	-0.9375	0	0.381818	0.6	0.866667	-0.461539	-0.25	-0.666667	0.546392	0.666667	-0.030303	0.2	-0.478261	0	-0.909091	0.84	0.134328	-0.030303	0.6	0.925926	0.692308	0.142857		0
																		0.978261	0.69697	0.916667	0.969697	0.894737	0.6	-0.890591	0.411765	-0.9375	0	0.381818	0.6	0.866667	-0.461539	-0.25	-0.666667	0.546392	0.666667	-0.030303	0.2	-0.478261	0	-0.909091	0.84	0.134328	-0.030303	0.6	0.925926	0.692308	0.142857		0
																		0.978261	0.69697	0.916667	0.969697	0.894737	0.6	-0.890591	0.411765	-0.9375	0	0.381818	0.6	0.866667	-0.461539	-0.25	-0.666667	0.546392	0.666667	-0.030303	0.2	-0.478261	0	-0.909091	0.84	0.134328	-0.030303	0.6	0.925926	0.692308	0.142857		0
																		0.978261	0.69697	0.916667	0.969697	0.894737	0.6	-0.890591	0.433962	-0.9375	0	0.381818	0.6	0.866667	-0.461539	-0.25	-0.666667	0.546392	0.666667	-0.030303	0.2	-0.478261	0	-0.909091	0.84	0.134328	-0.030303	0.6	0.925926	0.692308	0.142857		0
																		0.978261	0.69697	0.916667	0.969697	0.894737	0.6	-0.890591	0.482759	-0.9375	0	0.381818	0.6	0.866667	-0.461539	-0.25	-0.666667	0.546392	0.666667	-0.030303	0.2	-0.478261	0	-0.909091	0.84	0.134328	-0.030303	0.6	0.925926	0.692308	0.142857		0
																		0.978261	0.69697	0.916667	0.969697	0.894737	0.6	-0.890591	0.491525	-0.9375	0	0.381818	0.6	0.866667	-0.461539	-0.25	-0.666667	0.546392	0.666667	-0.030303	0.2	-0.478261	0	-0.909091	0.84	0.134328	-0.030303	0.6	0.925926	0.692308	0.142857		0
																		0.978261	0.69697	0.916667	0.969697	0.894737	0.6	-0.890591	0.508197	-0.9375	0	0.381818	0.6	0.866667	-0.461539	-0.25	-0.666667	0.546392	0.666667	-0.030303	0.2	-0.478261	0	-0.909091	0.84	0.117647	-0.030303	0.6	0.925926	0.692308	0.142857		0
																		0.978261	0.69697	0.916667	0.969697	0.894737	0.6	-0.890591	0.558824	-0.9375	0	0.381818	0.6	0.866667	-0.461539	-0.25	-0.666667	0.546392	0.666667	-0.030303	0.2	-0.478261	0	-0.909091	0.84	0.117647	-0.030303	0.6	0.925926	0.692308	-0.428571		0
																		0.978261	0.69697	0.916667	0.969697	0.894737	0.6	-0.890591	0.558824	-0.9375	0	0.381818	0.6	0.866667	-0.461539	-0.25	-0.666667	0.546392	0.666667	-0.030303	0.2	-0.478261	0	-0.909091	0.84	0.117647	-0.030303	0.6	0.925926	0.692308	-0.666667		0
																		0.978261	0.69697	0.916667	0.969697	0.894737	0.6	-0.890591	0.558824	-0.9375	0	0.381818	0.6	0.866667	-0.461539	-0.25	-0.666667	0.568627	0.666667	-0.030303	0.2	-0.478261	0	-0.909091	0.84	0.117647	-0.030303	0.6	0.925926	0.692308	-0.68		0
																		0.978261	0.69697	0.916667	0.969697	0.894737	0.6	-0.890591	0.565217	-0.9375	0	0.381818	0.6	0.866667	-0.461539	-0.25	-0.666667	0.592593	0.666667	-0.030303	0.2	-0.478261	0	-0.909091	0.84	0.117647	-0.030303	0.6	0.925926	0.692308	-0.68		0
																		0.978261	0.69697	0.916667	0.969697	0.894737	0.6	-0.890591	0.565217	-0.9375	0	0.381818	0.6	0.866667	-0.461539	-0.25	-0.666667	0.614035	0.666667	-0.030303	0.2	-0.478261	0	-0.909091	0.84	0.117647	-0.030303	0.6	0.925926	0.692308	-0.68		0
																		0.978261	0.69697	0.916667	0.969697	0.894737	0.6	-0.890591	0.565217	-0.9375	0	0.381818	0.6	0.866667	-0.461539	-0.25	-0.666667	0.627119	0.666667	-0.030303	0.2	-0.478261	0	-0.909091	0.84	0.189189	-0.030303	0.6	0.925926	0.692308	-0.68		0
																		0.978261	0.69697	0.916667	0.969697	0.894737	0.6	-0.890591	0.565217	-0.9375	0	0.381818	0.6	0.866667	-0.461539	-0.25	-0.666667	0.633333	0.666667	-0.030303	0.2	-0.478261	0	-0.909091	0.84	0.25	-0.030303	0.6	0.925926	0.692308	-0.68		0
																		0.978261	0.69697	0.916667	0.969697	0.894737	0.6	-0.890591	0.565217	-0.9375	0	0.381818	0.6	0.866667	-0.461539	-0.25	-0.666667	0.648	0.666667	-0.030303	0.2	-0.478261	0	-0.909091	0.84	0.25	-0.030303	0.6	0.925926	0.692308	-0.68		0
																		0.978261	0.69697	0.916667	0.969697	0.894737	0.6	-0.890591	0.565217	-0.9375	0	0.381818	0.6	0.866667	-0.461539	-0.25	-0.666667	0.661539	0.666667	-0.030303	0.2	-0.478261	0	-0.909091	0.84	0.25	-0.030303	0.6	0.925926	0.692308	-0.68		0
																		0.978261	0.69697	0.916667	0.969697	0.894737	0.6	-0.890591	0.565217	-0.9375	0	0.381818	0.6	0.866667	-0.461539	-0.25	-0.666667	0.661539	0.666667	-0.030303	0.2	-0.478261	0	-0.909091	0.84	0.25	-0.030303	0.6	0.925926	0.692308	-0.68		0
																		0.978261	0.69697	0.916667	0.969697	0.894737	0.6	-0.890591	0.565217	-0.9375	0	0.381818	0.6	0.866667	-0.461539	-0.25	-0.666667	0.664122	0.666667	-0.030303	0.2	-0.478261	0	-0.909091	0.84	0.234568	-0.030303	0.6	0.925926	0.692308	-0.68		0
																		0.978261	0.513513	0.916667	0.969697	0.894737	0.6	-0.890591	0.565217	-0.9375	0	0.381818	0.6	0.866667	-0.461539	-0.25	-0.666667	0.664122	0.666667	-0.030303	0.2	-0.478261	0	-0.909091	0.84	0.234568	-0.030303	0.6	0.925926	0.692308	-0.68		0
																		0.978261	0.4	0.916667	0.969697	0.894737	0.6	-0.890591	0.565217	-0.9375	0	0.381818	0.6	0.866667	-0.461539	-0.25	-0.666667	0.664122	0.666667	-0.030303	0.2	-0.478261	0	-0.909091	0.84	0.234568	-0.030303	0.6	0.925926	0.692308	-0.68		0
																		0.978261	0.365854	0.916667	0.969697	0.894737	0.6	-0.890591	0.565217	-0.9375	0	0.381818	0.6	0.866667	-0.461539	-0.25	-0.666667	0.664122	0.666667	-0.030303	0.2	-0.478261	0	-0.909091	0.84	0.234568	-0.030303	0.6	0.925926	0.692308	-0.68		0
																		0.978261	0.365854	0.916667	0.969697	0.894737	0.6	-0.890591	0.565217	-0.9375	0	0.381818	0.6	0.866667	-0.461539	-0.25	-0.666667	0.664122	0.666667	-0.030303	0.2	-0.478261	0	-0.909091	0.84	0.234568	-0.030303	0.6	0.925926	0.692308	-0.68		0
																		0.978261	0.365854	0.916667	0.969697	0.894737	0.6	-0.890591	0.565217	-0.9375	0	0.381818	0.6	0.866667	-0.461539	-0.25	-0.666667	0.664122	0.666667	-0.030303	0.2	-0.478261	0	-0.909091	0.84	0.234568	-0.030303	0.6	0.925926	0.692308	-0.68		0
																		0.978261	0.365854	0.916667	0.969697	0.894737	0.6	-0.890591	0.571429	-0.9375	0	0.381818	0.6	0.866667	-0.461539	-0.25	-0.666667	0.664122	0.666667	-0.030303	0.2	-0.478261	0	-0.909091	0.84	0.234568	-0.030303	0.6	0.925926	0.692308	-0.68		0
																		0.978261	0.365854	0.916667	0.969697	0.894737	0.6	-0.890591	0.571429	-0.9375	0	0.381818	0.6	0.866667	-0.461539	-0.25	-0.666667	0.664122	0.666667	-0.030303	0.2	-0.478261	0	-0.909091	0.84	0.234568	-0.030303	0.6	0.925926	0.692308	-0.68		0
																		0.978261	0.365854	0.916667	0.969697	0.894737	0.6	-0.890591	0.571429	-0.9375	0	0.381818	0.6	0.866667	-0.461539	-0.25	-0.666667	0.664122	0.666667	-0.030303	0.2	-0.478261	0	-0.909091	0.84	0.234568	-0.030303	0.6	0.925926	0.692308	-0.68		0
																		0.978261	0.365854	0.916667	0.969697	0.894737	0.6	-0.890591	0.571429	-0.9375	0	0.381818	0.6	0.866667	-0.461539	-0.25	-0.666667	0.664122	0.666667	-0.030303	0.2	-0.478261	0	-0.909091	0.84	0.234568	-0.030303	0.6	0.925926	0.692308	-0.68		0
																		0.978261	0.365854	0.916667	0.969697	0.894737	0.6	-0.890591	0.571429	-0.9375	0	0.381818	0.6	0.866667	-0.461539	-0.25	-0.666667	0.664122	0.666667	-0.030303	0.2	-0.478261	0	-0.909091	0.84	0.234568	-0.030303	0.6	0.925926	0.692308	-0.68		0
																		0.978261	0.365854	0.916667	0.969697	0.894737	0.6	-0.890591	0.571429	-0.9375	0	0.381818	0.6	0.866667	-0.461539	-0.25	-0.666667	0.664122	0.666667	-0.030303	0.2	-0.478261	0	-0.909091	0.84	0.234568	-0.030303	0.6	0.925926	0.692308	-0.703704		0
																		0.978261	0.365854	0.916667	0.969697	0.894737	0.6	-0.890591	0.571429	-0.9375	0	0.381818	0.6	0.866667	-0.461539	-0.25	-0.666667	0.664122	0.666667	-0.030303	0.2	-0.478261	0	-0.909091	0.84	0.234568	-0.030303	0.6	0.925926	0.692308	-0.703704		0
																		0.978261	0.365854	0.916667	0.969697	0.894737	0.6	-0.890591	0.571429	-0.9375	0	0.381818	0.6	0.866667	-0.461539	-0.25	-0.666667	0.664122	0.666667	-0.030303	0.2	-0.478261	0	-0.909091	0.84	0.234568	-0.030303	0.6	0.925926	0.692308	-0.703704		0
																		0.978261	0.365854	0.916667	0.969697	0.894737	0.6	-0.890591	0.571429	-0.9375	0	0.381818	0.6	0.866667	-0.461539	-0.25	-0.666667	0.664122	0.666667	-0.030303	0.2	-0.478261	0	-0.909091	0.84	0.234568	-0.030303	0.6	0.925926	0.692308	-0.703704		0
																		0.978261	0.365854	0.916667	0.969697	0.894737	0.6	-0.890591	0.571429	-0.9375	0	0.381818	0.6	0.866667	-0.461539	-0.25	-0.666667	0.664122	0.666667	-0.030303	0.2	-0.478261	0	-0.909091	0.84	0.234568	-0.030303	0.6	0.925926	0.692308	-0.703704		0
																		0.978261	0.365854	0.916667	0.969697	0.894737	0.6	-0.890591	0.571429	-0.9375	0	0.381818	0.6	0.866667	-0.461539	-0.25	-0.666667	0.664122	0.666667	-0.030303	0.2	-0.478261	0	-0.909091	0.84	0.234568	-0.030303	0.6	0.925926	0.692308	-0.703704		0
																		0.978261	0.365854	0.916667	0.969697	0.896552	0.6	-0.890591	0.571429	-0.9375	0	0.381818	0.6	0.866667	-0.461539	-0.25	-0.666667	0.664122	0.666667	-0.030303	0.2	-0.478261	0	-0.909091	0.84	0.234568	-0.030303	0.6	0.925926	0.692308	-0.703704		0
																		0.978261	0.365854	0.916667	0.969697	0.896552	0.6	-0.890591	0.571429	-0.9375	0	0.381818	0.6	0.866667	-0.461539	-0.25	-0.666667	0.664122	0.666667	-0.030303	0.2	-0.478261	0	-0.909091	0.84	0.234568	-0.030303	0.6	0.925926	0.692308	-0.703704		0
																		0.978261	0.365854	0.916667	0.969697	0.896552	0.6	-0.890591	0.571429	-0.9375	0	0.381818	0.6	0.866667	-0.461539	-0.25	-0.666667	0.664122	0.666667	-0.030303	0.2	-0.478261	0	-0.909091	0.84	0.234568	-0.030303	0.6	0.925926	0.692308	-0.703704		0
																		0.978261	0.365854	0.916667	0.969697	0.896552	0.6	-0.890591	0.571429	-0.9375	0	0.381818	0.6	0.866667	-0.461539	-0.25	-0.666667	0.664122	0.666667	-0.030303	0.2	-0.478261	0	-0.909091	0.84	0.234568	-0.030303	0.6	0.925926	0.692308	-0.703704		0
																		0.978261	0.365854	0.916667	0.969697	0.896552	0.6	-0.890591	0.571429	-0.9375	0	0.381818	0.6	0.866667	-0.461539	-0.25	-0.666667	0.664122	0.666667	-0.030303	0.2	-0.478261	0	-0.909091	0.84	0.234568	-0.030303	0.6	0.925926	0.692308	-0.703704		0
																		0.978261	0.365854	0.916667	0.969697	0.896552	0.6	-0.890591	0.571429	-0.9375	0	0.381818	0.6	0.866667	-0.461539	-0.25	-0.666667	0.664122	0.666667	-0.030303	0.2	-0.478261	0	-0.909091	0.84	0.234568	-0.030303	0.6	0.925926	0.692308	-0.703704		0
																		0.978261	0.365854	0.916667	0.969697	0.896552	0.6	-0.890591	0.571429	-0.9375	0	0.381818	0.6	0.866667	-0.461539	-0.25	-0.666667	0.664122	0.666667	-0.030303	0.2	-0.478261	0	-0.909091	0.84	0.234568	-0.030303	0.6	0.925926	0.692308	-0.703704		0
																		0.978261	0.365854	0.916667	0.969697	0.896552	0.6	-0.890591	0.571429	-0.9375	0.555556	0.381818	0.6	0.866667	-0.461539	-0.25	-0.666667	0.664122	0.666667	-0.030303	0.2	-0.478261	0	-0.909091	0.84	0.234568	-0.030303	0.6	0.925926	0.692308	-0.703704		0
																		0.978261	0.365854	0.916667	0.969697	0.896552	0.6	-0.890591	0.571429	-0.9375	0.666667	0.381818	0.6	0.866667	-0.461539	-0.25	-0.666667	0.664122	0.666667	-0.030303	0.2	-0.478261	0	-0.909091	0.84	0.234568	-0.030303	0.6	0.925926	0.692308	-0.703704		0
																		0.978261	0.365854	0.916667	0.969697	0.896552	0.6	-0.890591	0.571429	-0.9375	0.692308	0.381818	0.6	0.866667	-0.461539	-0.25	-0.666667	0.664122	0.666667	-0.030303	0.2	-0.478261	0	-0.909091	0.84	0.234568	-0.030303	0.6	0.925926	0.692308	-0.703704		0
																		0.978261	0.365854	0.916667	0.969697	0.896552	0.6	-0.890591	0.571429	-0.9375	0.733333	0.381818	0.6	0.866667	-0.461539	-0.25	-0.666667	0.664122	0.666667	-0.030303	0.2	-0.478261	0	-0.909091	0.84	0.234568	-0.030303	0.6	0.925926	0.692308	-0.703704		0
																		0.978261	0.365854	0.916667	0.969697	0.896552	0.6	-0.890591	0.571429	-0.9375	0.8	0.381818	0.6	0.866667	-0.461539	-0.25	-0.666667	0.664122	0.666667	-0.030303	0.2	-0.478261	0	-0.909091	0.84	0.234568	-0.030303	0.6	0.925926	0.692308	-0.703704		0
																		0.978261	0.365854	0.916667	0.969697	0.896552	0.6	-0.890591	0.571429	-0.9375	0.8	0.381818	0.6	0.866667	-0.5	-0.25	-0.666667	0.664122	0.666667	-0.030303	0.2	-0.478261	0	-0.909091	0.84	0.234568	-0.030303	0.6	0.925926	0.692308	-0.703704		0
																		0.978261	0.365854	0.916667	0.969697	0.896552	0.6	-0.890591	0.571429	-0.9375	0.8	0.381818	0.6	0.866667	-0.5	-0.25	-0.666667	0.664122	0.666667	-0.030303	0.2	-0.478261	0	-0.909091	0.84	0.234568	-0.030303	0.6	0.925926	0.692308	-0.703704		0
																		0.978261	0.365854	0.916667	0.969697	0.896552	0.6	-0.890591	0.571429	-0.9375	0.809524	0.381818	0.6	0.866667	-0.5	-0.25	-0.666667	0.664122	0.666667	-0.030303	0.2	-0.478261	0	-0.909091	0.84	0.234568	-0.030303	0.6	0.925926	0.692308	-0.703704		0
																		0.978261	0.365854	0.916667	0.969697	0.896552	0.6	-0.890591	0.571429	-0.9375	0.809524	0.381818	0.6	0.866667	-0.5	-0.368421	-0.666667	0.664122	0.666667	-0.030303	0.2	-0.478261	0	-0.909091	0.84	0.234568	0	0.6	0.925926	0.692308	-0.703704		0
																		0.978261	0.365854	0.916667	0.969697	0.896552	0.6	-0.890591	0.571429	-0.9375	0.809524	0.381818	0.6	0.866667	-0.5	-0.368421	-0.666667	0.664122	0.666667	-0.030303	0.2	-0.478261	0	-0.909091	0.84	0.234568	0.128205	0.6	0.925926	0.692308	-0.703704		0
																		0.978261	0.365854	0.916667	0.969697	0.896552	0.6	-0.890591	0.571429	-0.9375	0.809524	0.381818	0.6	0.866667	-0.5	-0.368421	-0.666667	0.664122	0.666667	-0.030303	0.2	-0.478261	0	-0.909091	0.84	0.234568	0.291667	0.6	0.925926	0.692308	-0.703704		0
																		0.978261	0.365854	0.916667	0.969697	0.896552	0.6	-0.890591	0.571429	-0.9375	0.809524	0.381818	0.6	0.866667	-0.5	-0.368421	-0.666667	0.664122	0.666667	-0.030303	0.2	-0.478261	0	-0.909091	0.84	0.234568	0.381818	0.6	0.925926	0.692308	-0.703704		0
																		0.978261	0.365854	0.916667	0.969697	0.896552	0.6	-0.890591	0.571429	-0.9375	0.809524	0.381818	0.6	0.75	-0.5	-0.368421	-0.666667	0.664122	0.666667	-0.030303	0.2	-0.478261	0	-0.909091	0.84	0.234568	0.403509	0.6	0.925926	0.692308	-0.703704		0
																		0.978261	0.365854	0.916667	0.969697	0.896552	0.6	-0.890591	0.571429	-0.9375	0.809524	0.381818	0.6	0.75	-0.5	-0.368421	-0.666667	0.664122	0.666667	-0.030303	0.2	-0.478261	0	-0.909091	0.84	0.234568	0.413793	0.6	0.925926	0.692308	-0.703704		0
																		0.978261	0.365854	0.916667	0.969697	0.896552	0.6	-0.890591	0.571429	-0.9375	0.809524	0.381818	0.6	0.75	-0.5	-0.368421	-0.666667	0.664122	0.666667	-0.030303	0.2	-0.478261	0	-0.909091	0.84	0.234568	0.413793	0.6	0.925926	0.692308	-0.703704		0
																		0.978261	0.365854	0.916667	0.969697	0.896552	0.6	-0.890591	0.571429	-0.9375	0.809524	0.381818	0.6	0.75	-0.5	-0.368421	-0.666667	0.664122	0.666667	-0.030303	0.2	-0.478261	0	-0.909091	0.849057	0.234568	0.413793	0.6	0.925926	0.692308	-0.703704		0
																		0.978261	0.365854	0.916667	0.969697	0.896552	0.6	-0.890591	0.571429	-0.9375	0.809524	0.381818	0.6	0.75	-0.5	-0.368421	-0.666667	0.664122	0.666667	-0.030303	0.2	-0.478261	0	-0.909091	0.857143	0.234568	0.413793	0.6	0.925926	0.692308	-0.703704		0
																		0.978261	0.365854	0.916667	0.969697	0.896552	0.6	-0.890591	0.571429	-0.9375	0.809524	0.381818	0.6	0.75	-0.5	-0.368421	-0.666667	0.664122	0.666667	-0.030303	0.2	-0.478261	0	-0.909091	0.864407	0.234568	0.413793	0.6	0.925926	0.692308	-0.703704		0
																		0.978261	0.365854	0.916667	0.969697	0.896552	0.6	-0.890591	0.571429	-0.9375	0.809524	0.381818	0.6	0.75	-0.5	-0.368421	-0.666667	0.664122	0.666667	-0.030303	0.2	-0.478261	0	-0.909091	0.864407	0.234568	0.301587	0.6	0.925926	0.692308	-0.703704		0
																		0.978261	0.365854	0.916667	0.969697	0.896552	0.6	-0.890591	0.571429	-0.9375	0.809524	0.381818	0.6	0.75	-0.5	-0.368421	-0.666667	0.664122	0.666667	-0.030303	0.2	-0.5	0	-0.909091	0.866667	0.234568	0.28125	0.6	0.925926	0.692308	-0.703704		0
																		0.978261	0.365854	0.916667	0.969697	0.896552	0.6	-0.890591	0.571429	-0.9375	0.809524	0.381818	0.6	0.75	-0.5	-0.368421	-0.666667	0.664122	0.666667	-0.030303	0.2	-0.5	0	-0.909091	0.866667	0.234568	0.28125	0.6	0.925926	0.692308	-0.703704		0
																		0.978261	0.365854	0.916667	0.969697	0.896552	0.6	-0.890591	0.571429	-0.9375	0.809524	0.381818	0.6	0.75	-0.5	-0.368421	-0.666667	0.664122	0.666667	-0.030303	0.2	-0.5	0	-0.909091	0.866667	0.234568	0.28125	0.6	0.925926	0.692308	-0.703704		0
																		0.978261	0.365854	0.916667	0.969697	0.896552	0.6	-0.890591	0.571429	-0.939394	0.809524	0.381818	0.6	0.75	-0.5	-0.368421	-0.666667	0.664122	0.666667	-0.030303	0.2	-0.5	0	-0.909091	0.866667	0.234568	0.28125	0.6	0.925926	0.692308	-0.703704		0
																		0.978261	0.365854	0.916667	0.969697	0.896552	0.6	-0.890591	0.571429	-0.939394	0.809524	0.381818	0.6	0.75	-0.5	-0.368421	-0.666667	0.664122	0.666667	-0.030303	0.2	-0.52	0	-0.909091	0.866667	0.234568	0.28125	0.6	0.925926	0.692308	-0.703704		0
																		0.978261	0.365854	0.916667	0.969697	0.896552	0.6	-0.890591	0.571429	-0.939394	0.809524	0.381818	0.6	0.75	-0.5	-0.368421	-0.666667	0.664122	0.666667	-0.030303	0.2	-0.52	0	-0.909091	0.866667	0.234568	0.28125	0.6	0.925926	0.692308	-0.703704		0
																		0.978261	0.365854	0.916667	0.969697	0.896552	0.6	-0.890591	0.571429	-0.939394	0.809524	0.381818	0.6	0.75	-0.5	-0.368421	-0.666667	0.664122	0.666667	-0.030303	0.2	-0.52	0	-0.909091	0.866667	0.234568	0.28125	0.6	0.925926	0.692308	-0.703704		0
																		0.978261	0.365854	0.916667	0.969697	0.896552	0.6	-0.890591	0.571429	-0.939394	0.809524	0.381818	0.6	0.75	-0.5	-0.368421	-0.666667	0.664122	0.666667	-0.030303	0.2	-0.52	0	-0.909091	0.866667	0.234568	0.28125	0.6	0.925926	0.692308	-0.703704		0
																		0.978261	0.365854	0.916667	0.969697	0.896552	0.6	-0.890591	0.571429	-0.939394	0.809524	0.381818	0.6	0.75	-0.5	-0.368421	-0.666667	0.664122	0.666667	-0.030303	0.2	-0.52	0	-0.909091	0.866667	0.234568	0.28125	0.6	0.925926	0.692308	-0.703704		0
																		0.978261	0.365854	0.916667	0.969697	0.896552	0.6	-0.890591	0.571429	-0.939394	0.809524	0.381818	0.6	0.75	-0.5	-0.368421	-0.666667	0.666667	0.666667	-0.030303	0.2	-0.52	0	-0.909091	0.866667	0.234568	0.28125	0.6	0.925926	0.692308	-0.703704		0
																		0.978261	0.365854	0.916667	0.969697	0.896552	0.6	-0.890591	0.571429	-0.939394	0.809524	0.381818	0.6	0.75	-0.5	-0.368421	-0.666667	0.666667	0.666667	-0.030303	0.2	-0.52	0	-0.909091	0.866667	0.234568	0.28125	0.6	0.925926	0.692308	-0.703704		0
																		0.978261	0.365854	0.916667	0.969697	0.896552	0.6	-0.890591	0.571429	-0.939394	0.809524	0.381818	0.6	0.75	-0.5	-0.368421	-0.666667	0.666667	0.666667	-0.030303	0.2	-0.52	0	-0.909091	0.866667	0.234568	0.28125	0.6	0.925926	0.692308	-0.703704		0
																		0.978261	0.365854	0.916667	0.969697	0.896552	0.6	-0.890591	0.571429	-0.939394	0.809524	0.381818	0.6	0.75	-0.5	-0.368421	-0.666667	0.666667	0.666667	-0.030303	0.2	-0.52	0	-0.909091	0.866667	0.234568	0.28125	0.6	0.925926	0.692308	-0.703704		0
																		0.978261	0.365854	0.916667	0.969697	0.896552	0.6	-0.890591	0.571429	-0.939394	0.809524	0.381818	0.6	0.75	-0.5	-0.368421	-0.666667	0.666667	0.666667	-0.030303	0.18421	-0.52	0	-0.909091	0.866667	0.234568	0.28125	0.6	0.925926	0.692308	-0.703704		0
																		0.978261	0.365854	0.916667	0.969697	0.896552	0.6	-0.890591	0.571429	-0.939394	0.809524	0.357143	0.6	0.75	-0.5	-0.368421	-0.666667	0.666667	0.666667	-0.030303	0.18421	-0.52	0	-0.909091	0.866667	0.234568	0.292308	0.6	0.925926	0.692308	-0.703704		0
																		0.978261	0.365854	0.916667	0.969697	0.896552	0.6	-0.890591	0.571429	-0.939394	0.809524	0.245902	0.6	0.75	-0.5	-0.368421	-0.666667	0.666667	0.666667	-0.030303	0.18421	-0.52	0	-0.909091	0.866667	0.234568	0.369863	0.6	0.925926	0.692308	-0.703704		0
																		0.978261	0.365854	0.916667	0.969697	0.896552	0.6	-0.890591	0.571429	-0.939394	0.809524	0.101449	0.6	0.75	-0.5	-0.368421	-0.666667	0.666667	0.666667	-0.030303	0.18421	-0.52	0	-0.909091	0.866667	0.234568	0.402597	0.6	0.925926	0.692308	-0.703704		0
																		0.978261	0.365854	0.916667	0.969697	0.896552	0.6	-0.890591	0.571429	-0.939394	0.809524	-0.012987	0.6	0.75	-0.5	-0.368421	-0.666667	0.666667	0.666667	-0.030303	0.18421	-0.52	0	-0.909091	0.866667	0.234568	0.402597	0.6	0.925926	0.692308	-0.703704		0
																		0.978261	0.365854	0.916667	0.969697	0.896552	0.6	-0.890591	0.571429	-0.939394	0.809524	-0.0731707	0.6	0.75	-0.5	-0.368421	-0.666667	0.666667	0.666667	-0.030303	0.18421	-0.52	0	-0.909091	0.866667	0.234568	0.402597	0.6	0.925926	0.692308	-0.703704		0
																		0.978261	0.365854	0.916667	0.963746	0.896552	0.6	-0.890591	0.571429	-0.939394	0.809524	-0.0731707	0.6	0.75	-0.5	-0.368421	-0.666667	0.666667	0.666667	-0.030303	0.18421	-0.52	0	-0.909091	0.866667	0.234568	0.402597	0.6	0.925926	0.692308	-0.703704		0
																		0.978261	0.365854	0.916667	0.957831	0.896552	0.6	-0.890591	0.571429	-0.939394	0.809524	-0.0731707	0.6	0.75	-0.5	-0.368421	-0.666667	0.666667	0.666667	-0.030303	0.18421	-0.52	0	-0.909091	0.866667	0.234568	0.402597	0.6	0.925926	0.692308	-0.703704		0
																		0.978261	0.365854	0.916667	0.957831	0.896552	0.6	-0.890591	0.571429	-0.939394	0.809524	-0.0731707	0.6	0.75	-0.5	-0.368421	-0.666667	0.666667	0.666667	-0.030303	0.18421	-0.52	0	-0.909091	0.866667	0.234568	0.402597	0.6	0.925926	0.692308	-0.703704		0
																		0.978261	0.365854	0.916667	0.957831	0.896552	0.6	-0.890591	0.571429	-0.939394	0.809524	-0.0731707	0.6	0.75	-0.5	-0.368421	-0.666667	0.666667	0.666667	-0.030303	0.18421	-0.52	0	-0.909091	0.866667	0.234568	0.402597	0.6	0.925926	0.692308	-0.703704		-0.2
																		0.978261	0.365854	0.916667	0.957831	0.896552	0.6	-0.890591	0.571429	-0.939394	0.809524	-0.0731707	0.6	0.75	-0.5	-0.368421	-0.666667	0.666667	0.666667	-0.030303	0.18421	-0.52	0	-0.909091	0.866667	0.234568	0.402597	0.6	0.925926	0.692308	-0.703704		-0.2
																		0.978261	0.365854	0.916667	0.957831	0.896552	0.6	-0.890591	0.571429	-0.939394	0.809524	-0.0731707	0.6	0.75	-0.5	-0.368421	-0.666667	0.666667	0.666667	-0.030303	0.18421	-0.52	0	-0.909091	0.866667	0.234568	0.402597	0.6	0.925926	0.692308	-0.703704		-0.2
																		0.978261	0.365854	0.916667	0.957831	0.9	0.6	-0.890591	0.571429	-0.939394	0.809524	-0.0731707	0.6	0.75	-0.5	-0.368421	-0.666667	0.666667	0.666667	-0.030303	0.18421	-0.52	0	-0.909091	0.866667	0.234568	0.402597	0.6	0.925926	0.692308	-0.703704		-0.2
																		0.978261	0.365854	0.916667	0.957831	0.9	0.6	-0.890591	0.571429	-0.939394	0.809524	-0.0731707	0.6	0.75	-0.5	-0.368421	-0.666667	0.666667	0.666667	-0.030303	0.18421	-0.52	0	-0.909091	0.878788	0.234568	0.402597	0.6	0.925926	0.692308	-0.703704		-0.2
																		0.978261	0.365854	0.916667	0.957831	0.9	0.6	-0.890591	0.571429	-0.939394	0.809524	-0.0731707	0.6	0.75	-0.5	-0.368421	-0.666667	0.666667	0.666667	-0.030303	0.18421	-0.52	0	-0.909091	0.890411	0.234568	0.402597	0.6	0.925926	0.692308	-0.703704		-0.2
																		0.978261	0.365854	0.916667	0.957831	0.9	0.6	-0.890591	0.571429	-0.939394	0.809524	-0.0731707	0.6	0.75	-0.5	-0.368421	-0.666667	0.666667	0.666667	-0.030303	0.18421	-0.52	0	-0.909091	0.890411	0.234568	0.402597	0.6	0.925926	0.692308	-0.703704		-0.2
																		0.978261	0.365854	0.916667	0.957831	0.9	0.6	-0.890591	0.571429	-0.939394	0.809524	-0.0731707	0.6	0.75	-0.5	-0.368421	-0.666667	0.666667	0.666667	-0.030303	0.18421	-0.52	0	-0.909091	0.891892	0.234568	0.402597	0.6	0.925926	0.692308	-0.703704		-0.2
																		0.978261	0.365854	0.916667	0.957831	0.9	0.6	-0.890591	0.571429	-0.939394	0.809524	-0.0731707	0.6	0.75	-0.5	-0.368421	-0.666667	0.666667	0.666667	-0.030303	0.18421	-0.52	0	-0.909091	0.891892	0.234568	0.402597	0.6	0.925926	0.692308	-0.703704		-0.2
																		0.978261	0.365854	0.916667	0.957831	0.9	0.6	-0.890591	0.571429	-0.939394	0.809524	-0.0731707	0.6	0.75	-0.5	-0.368421	-0.666667	0.666667	0.666667	-0.030303	0.18421	-0.52	0	-0.909091	0.891892	0.234568	0.402597	0.6	0.925926	0.692308	-0.703704		-0.2
																		0.978261	0.365854	0.916667	0.957831	0.9	0.6	-0.890591	0.571429	-0.939394	0.809524	-0.0731707	0.6	0.75	-0.5	-0.368421	-0.666667	0.666667	0.666667	-0.030303	0.18421	-0.52	0	-0.909091	0.891892	0.234568	0.402597	0.6	0.925926	0.692308	-0.703704		-0.2
																		0.978261	0.365854	0.916667	0.957831	0.9	0.6	-0.890591	0.571429	-0.939394	0.809524	-0.0731707	0.6	0.75	-0.5	-0.368421	-0.666667	0.666667	0.666667	-0.030303	0.18421	-0.52	0	-0.909091	0.891892	0.234568	0.402597	0.6	0.925926	0.692308	-0.703704		-0.2
																		0.978261	0.365854	0.916667	0.957831	0.9	0.6	-0.890591	0.571429	-0.939394	0.809524	-0.0731707	0.6	0.75	-0.5	-0.368421	-0.666667	0.666667	0.666667	-0.030303	0.18421	-0.52	0	-0.909091	0.891892	0.234568	0.402597	0.6	0.925926	0.692308	-0.703704		-0.2
																		0.978261	0.365854	0.916667	0.957831	0.9	0.6	-0.890591	0.571429	-0.939394	0.809524	-0.0731707	0.6	0.75	-0.5	-0.368421	-0.666667	0.666667	0.666667	-0.030303	0.18421	-0.52	0	-0.909091	0.891892	0.234568	0.402597	0.6	0.925926	0.692308	-0.703704		-0.2
																		0.978261	0.365854	0.916667	0.957831	0.9	0.6	-0.890591	0.571429	-0.939394	0.809524	-0.116279	0.6	0.75	-0.5	-0.368421	-0.666667	0.666667	0.666667	-0.030303	0.18421	-0.52	0	-0.909091	0.891892	0.234568	0.402597	0.6	0.925926	0.692308	-0.703704		-0.2
																		0.978261	0.365854	0.916667	0.957831	0.901639	0.6	-0.890591	0.571429	-0.939394	0.809524	-0.116279	0.6	0.75	-0.5	-0.368421	-0.666667	0.666667	0.666667	-0.030303	0.18421	-0.52	0	-0.909091	0.891892	0.234568	0.402597	0.6	0.925926	0.692308	-0.703704		-0.2
																		0.978261	0.365854	0.916667	0.957831	0.903226	0.6	-0.890591	0.571429	-0.939394	0.809524	-0.116279	0.6	0.75	-0.5	-0.368421	-0.666667	0.666667	0.666667	-0.030303	0.18421	-0.52	0	-0.909091	0.891892	0.234568	0.402597	0.6	0.925926	0.692308	-0.703704		-0.2
																		0.978261	0.365854	0.916667	0.957831	0.903226	0.6	-0.890591	0.571429	-0.939394	0.809524	-0.116279	0.6	0.75	-0.5	-0.368421	-0.666667	0.666667	0.666667	-0.030303	0.18421	-0.52	0	-0.909091	0.891892	0.234568	0.402597	0.6	0.925926	0.692308	-0.703704		-0.2
																		0.978261	0.365854	0.916667	0.957831	0.903226	0.6	-0.890591	0.571429	-0.939394	0.809524	-0.116279	0.6	0.75	-0.5	-0.368421	-0.666667	0.666667	0.666667	-0.030303	0.18421	-0.52	0	-0.909091	0.891892	0.234568	0.402597	0.6	0.925926	0.692308	-0.703704		-0.2
																		0.978261	0.365854	0.916667	0.957831	0.903226	0.6	-0.890591	0.571429	-0.939394	0.809524	-0.116279	0.6	0.75	-0.5	-0.368421	-0.666667	0.666667	0.666667	-0.030303	0.18421	-0.586207	0	-0.909091	0.891892	0.234568	0.402597	0.6	0.925926	0.692308	-0.703704		-0.2
																		0.978261	0.365854	0.916667	0.957831	0.903226	0.6	-0.890591	0.571429	-0.939394	0.809524	-0.116279	0.6	0.75	-0.5	-0.368421	-0.666667	0.666667	0.666667	-0.030303	0.18421	-0.636364	0	-0.909091	0.891892	0.234568	0.402597	0.6	0.925926	0.692308	-0.703704		-0.2
																		0.978261	0.365854	0.916667	0.957831	0.903226	0.6	-0.890591	0.571429	-0.939394	0.809524	-0.116279	0.6	0.647059	-0.5	-0.368421	-0.666667	0.666667	0.666667	-0.030303	0.18421	-0.666667	0	-0.909091	0.891892	0.234568	0.402597	0.6	0.925926	0.692308	-0.703704		-0.2
																		0.978261	0.365854	0.916667	0.957831	0.903226	0.6	-0.890591	0.571429	-0.939394	0.809524	-0.116279	0.6	0.647059	-0.5	-0.368421	-0.666667	0.666667	0.666667	-0.030303	0.18421	-0.666667	0	-0.909091	0.891892	0.234568	0.402597	0.6	0.925926	0.692308	-0.703704		-0.2
																		0.978261	0.365854	0.916667	0.957831	0.903226	0.6	-0.890591	0.571429	-0.939394	0.809524	-0.116279	0.6	0.647059	-0.5	-0.368421	-0.666667	0.666667	0.666667	-0.030303	0.18421	-0.675676	0	-0.909091	0.891892	0.234568	0.402597	0.6	0.925926	0.692308	-0.703704		-0.2
																		0.978261	0.365854	0.916667	0.957831	0.903226	0.6	-0.890591	0.571429	-0.939394	0.809524	-0.116279	0.6	0.647059	-0.5	-0.368421	-0.666667	0.666667	0.666667	-0.030303	0.18421	-0.675676	0	-0.909091	0.891892	0.234568	0.402597	0.6	0.925926	0.692308	-0.703704		-0.2
																		0.978261	0.365854	0.916667	0.957831	0.903226	0.6	-0.890591	0.571429	-0.939394	0.809524	-0.116279	0.6	0.647059	-0.5	-0.368421	-0.666667	0.666667	0.666667	-0.030303	0.18421	-0.675676	0	-0.909091	0.891892	0.234568	0.402597	0.6	0.925926	0.692308	-0.703704		-0.2
																		0.978261	0.365854	0.916667	0.957831	0.903226	0.6	-0.890591	0.571429	-0.939394	0.809524	-0.116279	0.6	0.647059	-0.5	-0.368421	-0.666667	0.666667	0.666667	-0.030303	0.18421	-0.675676	0	-0.909091	0.891892	0.234568	0.402597	0.6	0.925926	0.692308	-0.703704		-0.2
																		0.978261	0.365854	0.916667	0.957831	0.904762	0.6	-0.890591	0.571429	-0.939394	0.809524	-0.116279	0.6	0.647059	-0.5	-0.368421	-0.666667	0.666667	0.666667	-0.030303	0.18421	-0.675676	0	-0.909091	0.891892	0.234568	0.402597	0.6	0.925926	0.692308	-0.703704		-0.2
																		0.978261	0.365854	0.916667	0.957831	0.90625	0.6	-0.890591	0.571429	-0.939394	0.809524	-0.116279	0.6	0.647059	-0.5	-0.368421	-0.666667	0.666667	0.666667	-0.030303	0.18421	-0.675676	0	-0.909091	0.891892	0.234568	0.402597	0.6	0.925926	0.692308	-0.703704		-0.2
																		0.978261	0.365854	0.916667	0.957831	0.90625	0.6	-0.890591	0.571429	-0.939394	0.809524	-0.116279	0.6	0.647059	-0.5	-0.368421	-0.666667	0.666667	0.666667	-0.030303	0.18421	-0.675676	0	-0.909091	0.891892	0.234568	0.402597	0.6	0.925926	0.692308	-0.703704		-0.2
																		0.978261	0.365854	0.916667	0.957831	0.90625	0.6	-0.890591	0.571429	-0.939394	0.809524	-0.116279	0.6	0.647059	-0.5	-0.368421	-0.666667	0.666667	0.666667	-0.030303	0.18421	-0.675676	0	-0.909091	0.891892	0.234568	0.402597	0.6	0.925926	0.692308	-0.703704		-0.2
																		0.978261	0.365854	0.916667	0.957831	0.909091	0.6	-0.890591	0.571429	-0.939394	0.809524	-0.116279	0.6	0.647059	-0.5	-0.368421	-0.666667	0.666667	0.666667	-0.030303	0.18421	-0.675676	0	-0.909091	0.891892	0.234568	0.402597	0.6	0.925926	0.692308	-0.703704		-0.2
																		0.978261	0.365854	0.916667	0.957831	0.911765	0.6	-0.890591	0.571429	-0.939394	0.809524	-0.116279	0.6	0.647059	-0.5	-0.368421	-0.666667	0.666667	0.666667	-0.030303	0.18421	-0.675676	0	-0.909091	0.891892	0.234568	0.402597	0.6	0.925926	0.692308	-0.703704		-0.2
																		0.978261	0.365854	0.916667	0.957831	0.915493	0.6	-0.890591	0.571429	-0.939394	0.809524	-0.116279	0.6	0.647059	-0.5	-0.368421	-0.666667	0.666667	0.666667	-0.030303	0.18421	-0.675676	0	-0.909091	0.891892	0.234568	0.402597	0.6	0.925926	0.692308	-0.703704		-0.2
																		0.978261	0.365854	0.916667	0.957831	0.917808	0.6	-0.890591	0.571429	-0.939394	0.809524	-0.116279	0.6	0.647059	-0.5	-0.368421	-0.666667	0.666667	0.666667	-0.030303	0.18421	-0.675676	0	-0.909091	0.891892	0.234568	0.402597	0.6	0.925926	0.692308	-0.703704		-0.2
																		0.978261	0.365854	0.916667	0.957831	0.92	0.6	-0.890591	0.571429	-0.939394	0.809524	-0.116279	0.6	0.647059	-0.5	-0.368421	-0.666667	0.666667	0.666667	-0.030303	0.18421	-0.675676	0	-0.909091	0.891892	0.234568	0.402597	0.6	0.925926	0.692308	-0.703704		-0.2
																		0.978261	0.365854	0.916667	0.957831	0.922078	0.6	-0.890591	0.571429	-0.939394	0.809524	-0.116279	0.6	0.647059	-0.5	-0.368421	-0.666667	0.666667	0.666667	-0.030303	0.18421	-0.675676	0	-0.909091	0.891892	0.234568	0.402597	0.6	0.925926	0.692308	-0.703704		-0.2
																		0.978261	0.365854	0.916667	0.957831	0.925	0.6	-0.890591	0.571429	-0.939394	0.809524	-0.116279	0.6	0.647059	-0.5	-0.368421	-0.666667	0.666667	0.666667	-0.030303	0.18421	-0.675676	0	-0.909091	0.891892	0.234568	0.402597	0.6	0.925926	0.692308	-0.703704		-0.2
																		0.978261	0.365854	0.916667	0.957831	0.926829	0.6	-0.890591	0.571429	-0.939394	0.809524	-0.116279	0.6	0.647059	-0.5	-0.368421	-0.666667	0.666667	0.666667	-0.030303	0.18421	-0.675676	0	-0.913044	0.891892	0.234568	0.402597	0.6	0.925926	0.692308	-0.703704		-0.2
																		0.978261	0.365854	0.916667	0.957831	0.929412	0.6	-0.890591	0.571429	-0.939394	0.809524	-0.116279	0.6	0.647059	-0.5	-0.368421	-0.666667	0.666667	0.666667	-0.030303	0.18421	-0.675676	0	-0.913044	0.891892	0.234568	0.402597	0.6	0.925926	0.692308	-0.703704		-0.2
																		0.978261	0.365854	0.916667	0.957831	0.931818	0.6	-0.890591	0.571429	-0.939394	0.809524	-0.116279	0.6	0.647059	-0.5	-0.368421	-0.666667	0.666667	0.666667	-0.030303	0.18421	-0.675676	0	-0.913044	0.891892	0.234568	0.402597	0.6	0.925926	0.692308	-0.703704		-0.2
																		0.978261	0.365854	0.916667	0.957831	0.933333	0.6	-0.890591	0.571429	-0.939394	0.809524	-0.116279	0.6	0.647059	-0.5	-0.368421	-0.666667	0.666667	0.666667	-0.030303	0.18421	-0.675676	0	-0.913044	0.891892	0.234568	0.402597	0.6	0.925926	0.692308	-0.703704		-0.2
																		0.978261	0.365854	0.916667	0.957831	0.934783	0.6	-0.890591	0.571429	-0.939394	0.809524	-0.116279	0.6	0.647059	-0.5	-0.368421	-0.666667	0.666667	0.666667	-0.030303	0.18421	-0.675676	0	-0.913044	0.891892	0.234568	0.402597	0.6	0.925926	0.692308	-0.703704		-0.2
																		0.978261	0.365854	0.916667	0.957831	0.93617	0.6	-0.890591	0.571429	-0.939394	0.809524	-0.116279	0.6	0.647059	-0.5	-0.368421	-0.666667	0.666667	0.666667	-0.030303	0.18421	-0.675676	0	-0.913044	0.891892	0.234568	0.402597	0.6	0.925926	0.692308	-0.703704		-0.2
																		0.978261	0.365854	0.916667	0.957831	0.9375	0.6	-0.890591	0.571429	-0.939394	0.809524	-0.116279	0.6	0.647059	-0.5	-0.368421	-0.666667	0.666667	0.666667	-0.030303	0.18421	-0.675676	0	-0.913044	0.891892	0.234568	0.402597	0.6	0.925926	0.692308	-0.703704		-0.2
																		0.978261	0.365854	0.916667	0.957831	0.938775	0.6	-0.890591	0.571429	-0.939394	0.809524	-0.116279	0.6	0.647059	-0.5	-0.368421	-0.666667	0.666667	0.666667	-0.030303	0.18421	-0.675676	0	-0.913044	0.891892	0.234568	0.402597	0.6	0.925926	0.692308	-0.703704		-0.2
																		0.978261	0.365854	0.916667	0.957831	0.94	0.6	-0.890591	0.571429	-0.939394	0.809524	-0.116279	0.6	0.647059	-0.5	-0.368421	-0.666667	0.666667	0.666667	-0.030303	0.18421	-0.675676	0	-0.913044	0.891892	0.234568	0.402597	0.6	0.925926	0.692308	-0.703704		-0.2
																		0.978261	0.365854	0.916667	0.957831	0.941176	0.6	-0.890591	0.571429	-0.939394	0.809524	-0.116279	0.6	0.647059	-0.5	-0.368421	-0.666667	0.666667	0.666667	-0.030303	0.18421	-0.675676	0	-0.913044	0.891892	0.234568	0.402597	0.6	0.925926	0.692308	-0.703704		-0.2
																		0.978261	0.365854	0.916667	0.957831	0.941176	0.6	-0.890591	0.571429	-0.939394	0.809524	-0.116279	0.6	0.647059	-0.5	-0.368421	-0.666667	0.666667	0.666667	-0.030303	0.18421	-0.675676	0	-0.913044	0.891892	0.219512	0.402597	0.6	0.925926	0.692308	-0.703704		-0.2
																		0.978261	0.365854	0.916667	0.957831	0.941176	0.6	-0.890591	0.571429	-0.939394	0.809524	-0.116279	0.6	0.647059	-0.5	-0.368421	-0.666667	0.666667	0.666667	-0.030303	0.18421	-0.675676	0	-0.913044	0.891892	0.162791	0.402597	0.6	0.925926	0.692308	-0.703704		-0.2
																		0.978261	0.365854	0.916667	0.957831	0.941176	0.6	-0.890591	0.571429	-0.939394	0.809524	-0.116279	0.6	0.647059	-0.5	-0.368421	-0.666667	0.666667	0.666667	-0.030303	0.18421	-0.675676	0	-0.913044	0.891892	0.162791	0.402597	0.6	0.925926	0.692308	-0.703704		-0.2
																		0.978261	0.365854	0.916667	0.957831	0.941176	0.6	-0.890591	0.571429	-0.939394	0.809524	-0.116279	0.6	0.647059	-0.5	-0.368421	-0.666667	0.666667	0.666667	-0.030303	0.18421	-0.675676	0	-0.913044	0.891892	0.162791	0.402597	0.6	0.925926	0.692308	-0.703704		-0.2
																		0.978261	0.365854	0.916667	0.957831	0.941176	0.6	-0.890591	0.571429	-0.939394	0.809524	-0.116279	0.6	0.647059	-0.5	-0.368421	-0.666667	0.666667	0.666667	-0.030303	0.18421	-0.675676	0	-0.913044	0.891892	0.162791	0.402597	0.6	0.925926	0.517241	-0.703704		-0.2
																		0.978261	0.365854	0.916667	0.957831	0.941176	0.6	-0.890591	0.571429	-0.939394	0.809524	-0.116279	0.6	0.647059	-0.5	-0.368421	-0.666667	0.666667	0.666667	-0.030303	0.18421	-0.675676	0	-0.913044	0.891892	0.162791	0.402597	0.6	0.925926	0.257143	-0.703704		-0.2
																		0.978261	0.365854	0.916667	0.957831	0.941176	0.6	-0.890591	0.571429	-0.939394	0.809524	-0.116279	0.6	0.647059	-0.5	-0.368421	-0.666667	0.666667	0.666667	-0.030303	0.18421	-0.675676	0	-0.913044	0.891892	0.162791	0.402597	0.6	0.925926	0.0731707	-0.703704		-0.2
																		0.978261	0.365854	0.916667	0.957831	0.941176	0.6	-0.890591	0.571429	-0.939394	0.809524	-0.116279	0.6	0.647059	-0.5	-0.368421	-0.666667	0.666667	0.666667	-0.030303	0.18421	-0.675676	0	-0.913044	0.891892	0.162791	0.402597	0.6	0.925926	-0.0833333	-0.703704		-0.2
																		0.978261	0.365854	0.916667	0.957831	0.941176	0.6	-0.890591	0.571429	-0.939394	0.809524	-0.116279	0.6	0.647059	-0.5	-0.368421	-0.666667	0.666667	0.666667	-0.030303	0.18421	-0.675676	0	-0.913044	0.891892	0.162791	0.402597	0.6	0.925926	-0.0833333	-0.703704		-0.2
																		0.978261	0.365854	0.916667	0.957831	0.941176	0.6	-0.890591	0.571429	-0.939394	0.809524	-0.116279	0.6	0.647059	-0.5	-0.368421	-0.666667	0.666667	0.666667	-0.030303	0.18421	-0.675676	0	-0.913044	0.891892	0.162791	0.402597	0.6	0.925926	-0.102041	-0.703704		-0.2
																		0.978261	0.365854	0.916667	0.957831	0.941176	0.6	-0.890591	0.571429	-0.939394	0.809524	-0.116279	0.6	0.647059	-0.5	-0.368421	-0.666667	0.666667	0.666667	-0.030303	0.18421	-0.675676	0	-0.913044	0.891892	0.162791	0.402597	0.6	0.925926	-0.102041	-0.703704		-0.2
																		0.978261	0.365854	0.916667	0.957831	0.941176	0.6	-0.890591	0.571429	-0.939394	0.809524	-0.116279	0.6	0.647059	-0.5	-0.368421	-0.666667	0.666667	0.666667	-0.030303	0.18421	-0.675676	0	-0.913044	0.891892	0.162791	0.402597	0.6	0.925926	-0.102041	-0.703704		-0.2
																		0.978261	0.365854	0.916667	0.957831	0.941176	0.6	-0.890591	0.571429	-0.939394	0.809524	-0.116279	0.6	0.647059	-0.5	-0.368421	-0.666667	0.666667	0.666667	-0.030303	0.18421	-0.675676	0	-0.913044	0.891892	0.162791	0.402597	0.6	0.925926	-0.102041	-0.642857		-0.2
																		0.978261	0.365854	0.916667	0.957831	0.941176	0.6	-0.890591	0.571429	-0.939394	0.809524	-0.116279	0.6	0.647059	-0.5	-0.368421	-0.666667	0.666667	0.666667	-0.030303	0.18421	-0.675676	0	-0.913044	0.891892	0.162791	0.402597	0.6	0.925926	-0.102041	-0.642857		-0.2
																		0.978261	0.365854	0.916667	0.957831	0.941176	0.6	-0.890591	0.571429	-0.939394	0.809524	-0.116279	0.6	0.647059	-0.5	-0.368421	-0.666667	0.666667	0.666667	-0.030303	0.18421	-0.675676	0	-0.913044	0.891892	0.162791	0.402597	0.6	0.925926	-0.102041	-0.642857		-0.2
																		0.978261	0.365854	0.916667	0.957831	0.941176	0.6	-0.890591	0.571429	-0.939394	0.809524	-0.116279	0.6	0.647059	-0.5	-0.368421	-0.666667	0.666667	0.666667	-0.030303	0.18421	-0.675676	0	-0.913044	0.891892	0.162791	0.402597	0.6	0.925926	-0.102041	-0.642857		-0.2
																		0.978261	0.365854	0.916667	0.957831	0.941176	0.6	-0.890591	0.571429	-0.939394	0.809524	-0.116279	0.6	0.647059	-0.5	-0.368421	-0.666667	0.666667	0.666667	-0.030303	0.18421	-0.675676	0	-0.913044	0.891892	0.162791	0.402597	0.6	0.925926	-0.102041	-0.642857		-0.2
																		0.978261	0.365854	0.916667	0.957831	0.941176	0.6	-0.890591	0.571429	-0.939394	0.809524	-0.116279	0.6	0.647059	-0.5	-0.368421	-0.666667	0.666667	0.666667	-0.030303	0.18421	-0.675676	0	-0.913044	0.891892	0.162791	0.402597	0.6	0.925926	-0.102041	-0.642857		-0.2
																		0.978261	0.365854	0.916667	0.957831	0.941176	0.6	-0.890591	0.571429	-0.939394	0.809524	-0.116279	0.6	0.647059	-0.5	-0.368421	-0.666667	0.666667	0.666667	-0.030303	0.18421	-0.675676	0	-0.913044	0.891892	0.162791	0.402597	0.6	0.925926	-0.0588235	-0.642857		-0.2
																		0.978261	0.365854	0.916667	0.957831	0.941176	0.6	-0.890591	0.571429	-0.939394	0.809524	-0.116279	0.6	0.647059	-0.5	-0.368421	-0.666667	0.666667	0.666667	-0.030303	0.18421	-0.675676	0	-0.913044	0.891892	0.162791	0.402597	0.6	0.925926	0.0181818	-0.642857		-0.2
																		0.978261	0.365854	0.916667	0.957831	0.941176	0.6	-0.890591	0.571429	-0.939394	0.809524	-0.116279	0.6	0.647059	-0.5	-0.368421	-0.666667	0.666667	0.666667	-0.030303	0.18421	-0.675676	0	-0.913044	0.891892	0.162791	0.402597	0.6	0.925926	0.0526316	-0.642857		-0.2
																		0.978261	0.365854	0.916667	0.957831	0.941176	0.6	-0.890591	0.571429	-0.939394	0.809524	-0.116279	0.6	0.647059	-0.5	-0.368421	-0.666667	0.666667	0.666667	-0.030303	0.18421	-0.675676	0	-0.913044	0.891892	0.162791	0.367089	0.6	0.925926	0.114754	-0.642857		-0.2
																		0.978261	0.365854	0.916667	0.957831	0.941176	0.6	-0.890591	0.571429	-0.939394	0.809524	-0.116279	0.6	0.647059	-0.5	-0.368421	-0.666667	0.666667	0.666667	-0.030303	0.18421	-0.675676	0	-0.913044	0.891892	0.136364	0.367089	0.6	0.925926	0.169231	-0.642857		-0.2
																		0.978261	0.365854	0.916667	0.957831	0.941176	0.6	-0.890591	0.571429	-0.939394	0.809524	-0.116279	0.6	0.647059	-0.5	-0.368421	-0.666667	0.666667	0.666667	-0.030303	0.18421	-0.675676	0	-0.913044	0.891892	0.136364	0.367089	0.6	0.925926	0.228571	-0.642857		-0.2
																		0.978261	0.365854	0.916667	0.957831	0.941176	0.6	-0.890591	0.571429	-0.941176	0.809524	-0.116279	0.6	0.647059	-0.5	-0.368421	-0.666667	0.666667	0.666667	-0.030303	0.18421	-0.675676	0	-0.913044	0.891892	0.136364	0.367089	0.6	0.925926	0.228571	-0.642857		-0.2
																		0.978261	0.365854	0.916667	0.957831	0.941176	0.6	-0.890591	0.571429	-0.941176	0.809524	-0.116279	0.6	0.647059	-0.5	-0.368421	-0.666667	0.666667	0.666667	-0.030303	0.18421	-0.675676	0	-0.913044	0.891892	0.136364	0.367089	0.6	0.925926	0.228571	-0.642857		-0.2
																		0.978261	0.365854	0.916667	0.957831	0.941176	0.6	-0.890591	0.571429	-0.941176	0.809524	-0.116279	0.6	0.647059	-0.5	-0.368421	-0.666667	0.666667	0.666667	-0.030303	0.18421	-0.675676	0	-0.913044	0.891892	0.136364	0.367089	0.6	0.925926	0.228571	-0.642857		-0.2
																		0.978261	0.365854	0.916667	0.957831	0.941176	0.6	-0.890591	0.571429	-0.941176	0.809524	-0.116279	0.6	0.647059	-0.5	-0.368421	-0.666667	0.666667	0.666667	-0.030303	0.18421	-0.675676	0	-0.913044	0.891892	0.136364	0.367089	0.6	0.925926	0.228571	-0.642857		-0.2
																		0.978261	0.365854	0.916667	0.957831	0.941176	0.6	-0.890591	0.571429	-0.941176	0.809524	-0.116279	0.6	0.647059	-0.5	-0.368421	-0.666667	0.666667	0.666667	-0.030303	0.18421	-0.675676	0	-0.913044	0.891892	0.136364	0.367089	0.6	0.925926	0.228571	-0.642857		-0.2
																		0.978261	0.365854	0.916667	0.957831	0.941176	0.6	-0.890591	0.571429	-0.941176	0.809524	-0.116279	0.6	0.647059	-0.5	-0.368421	-0.666667	0.666667	0.666667	-0.030303	0.18421	-0.675676	0	-0.913044	0.891892	0.136364	0.367089	0.6	0.925926	0.228571	-0.642857		-0.2
																		0.978261	0.365854	0.916667	0.957831	0.941176	0.6	-0.890591	0.571429	-0.941176	0.809524	-0.116279	0.6	0.647059	-0.5	-0.368421	-0.666667	0.666667	0.666667	-0.030303	0.18421	-0.675676	0	-0.913044	0.891892	0.136364	0.367089	0.6	0.925926	0.228571	-0.642857		-0.2
																		0.978261	0.365854	0.916667	0.957831	0.941176	0.6	-0.890591	0.571429	-0.941176	0.809524	-0.116279	0.6	0.647059	-0.5	-0.368421	-0.666667	0.666667	0.666667	-0.030303	0.18421	-0.675676	0	-0.913044	0.891892	0.136364	0.367089	0.6	0.925926	0.228571	-0.642857		-0.2
																		0.978261	0.365854	0.916667	0.957831	0.941176	0.6	-0.890591	0.571429	-0.941176	0.809524	-0.116279	0.6	0.647059	-0.5	-0.368421	-0.666667	0.666667	0.666667	-0.030303	0.18421	-0.675676	0	-0.913044	0.891892	0.136364	0.367089	0.6	0.925926	0.228571	-0.642857		-0.2
																		0.978261	0.365854	0.916667	0.957831	0.941176	0.6	-0.890591	0.571429	-0.941176	0.809524	-0.116279	0.6	0.647059	-0.5	-0.368421	-0.666667	0.666667	0.666667	-0.030303	0.18421	-0.675676	0	-0.913044	0.891892	0.136364	0.367089	0.6	0.925926	0.228571	-0.642857		-0.2
																		0.978261	0.365854	0.916667	0.957831	0.941176	0.6	-0.890591	0.571429	-0.941176	0.809524	-0.116279	0.6	0.647059	-0.5	-0.368421	-0.666667	0.666667	0.666667	-0.030303	0.18421	-0.675676	0	-0.913044	0.891892	0.136364	0.367089	0.6	0.925926	0.228571	-0.642857		-0.2
																		0.978261	0.365854	0.916667	0.957831	0.941176	0.6	-0.890591	0.571429	-0.941176	0.809524	-0.116279	0.6	0.647059	-0.5	-0.368421	-0.666667	0.666667	0.666667	-0.030303	0.18421	-0.675676	0	-0.913044	0.891892	0.136364	0.367089	0.6	0.925926	0.239437	-0.642857		-0.2
																		0.978261	0.365854	0.916667	0.957831	0.941176	0.6	-0.890591	0.571429	-0.941176	0.809524	-0.116279	0.6	0.647059	-0.5	-0.368421	-0.666667	0.666667	0.666667	-0.030303	0.18421	-0.675676	0	-0.913044	0.891892	0.136364	0.367089	0.6	0.925926	0.289474	-0.642857		-0.2
																		0.978261	0.365854	0.916667	0.957831	0.941176	0.6	-0.890591	0.571429	-0.941176	0.809524	-0.116279	0.6	0.647059	-0.5	-0.368421	-0.666667	0.666667	0.666667	-0.030303	0.18421	-0.675676	0	-0.913044	0.891892	0.136364	0.367089	0.6	0.925926	0.357143	-0.642857		-0.2
																		0.978261	0.365854	0.916667	0.957831	0.941176	0.6	-0.890591	0.571429	-0.941176	0.809524	-0.116279	0.6	0.647059	-0.5	-0.368421	-0.666667	0.666667	0.666667	-0.030303	0.18421	-0.675676	0	-0.913044	0.891892	0.136364	0.367089	0.6	0.925926	0.393258	-0.642857		-0.2
																		0.978261	0.365854	0.916667	0.957831	0.941176	0.6	-0.890591	0.571429	-0.941176	0.809524	-0.116279	0.6	0.647059	-0.5	-0.368421	-0.666667	0.666667	0.666667	-0.030303	0.18421	-0.675676	0	-0.913044	0.891892	0.136364	0.367089	0.6	0.925926	0.393258	-0.642857		-0.2
																		0.979592	0.365854	0.916667	0.957831	0.941176	0.6	-0.890591	0.571429	-0.941176	0.809524	-0.116279	0.6	0.647059	-0.5	-0.368421	-0.666667	0.666667	0.666667	-0.030303	0.18421	-0.675676	0	-0.913044	0.891892	0.136364	0.367089	0.6	0.925926	0.393258	-0.642857		-0.2
																		0.979592	0.365854	0.916667	0.957831	0.941176	0.6	-0.890591	0.571429	-0.941176	0.809524	-0.116279	0.6	0.647059	-0.5	-0.368421	-0.666667	0.666667	0.666667	-0.030303	0.18421	-0.675676	0	-0.913044	0.891892	0.136364	0.367089	0.6	0.925926	0.393258	-0.642857		-0.2
																		0.979592	0.365854	0.916667	0.957831	0.941176	0.6	-0.890591	0.571429	-0.941176	0.809524	-0.116279	0.6	0.647059	-0.5	-0.368421	-0.666667	0.666667	0.666667	-0.030303	0.18421	-0.675676	0	-0.913044	0.891892	0.136364	0.367089	0.6	0.925926	0.393258	-0.642857		-0.2
																		0.979592	0.365854	0.916667	0.957831	0.941176	0.6	-0.890591	0.571429	-0.941176	0.809524	-0.116279	0.6	0.647059	-0.5	-0.368421	-0.666667	0.666667	0.666667	-0.030303	0.18421	-0.675676	0	-0.913044	0.891892	0.136364	0.367089	0.6	0.925926	0.393258	-0.642857		-0.2
																		0.979592	0.365854	0.916667	0.957831	0.941176	0.6	-0.890591	0.571429	-0.941176	0.809524	-0.116279	0.6	0.647059	-0.5	-0.368421	-0.666667	0.666667	0.666667	-0.030303	0.18421	-0.675676	0	-0.913044	0.891892	0.123595	0.367089	0.6	0.925926	0.393258	-0.642857		-0.2
																		0.979592	0.365854	0.916667	0.957831	0.941176	0.6	-0.890591	0.571429	-0.941176	0.809524	-0.116279	0.6	0.647059	-0.5	-0.368421	-0.666667	0.666667	0.666667	-0.030303	0.18421	-0.675676	0	-0.913044	0.891892	0.123595	0.367089	0.6	0.925926	0.393258	-0.642857		-0.2
																		0.979592	0.365854	0.916667	0.957831	0.941176	0.6	-0.890591	0.571429	-0.941176	0.809524	-0.116279	0.6	0.647059	-0.5	-0.368421	-0.666667	0.666667	0.666667	-0.030303	0.18421	-0.675676	0	-0.913044	0.891892	0.123595	0.367089	0.6	0.925926	0.393258	-0.642857		-0.2
																		0.979592	0.365854	0.916667	0.957831	0.941176	0.6	-0.890591	0.571429	-0.941176	0.818182	-0.116279	0.6	0.647059	-0.5	-0.368421	-0.666667	0.666667	0.666667	-0.030303	0.18421	-0.675676	0	-0.913044	0.891892	0.123595	0.367089	0.6	0.925926	0.393258	-0.642857		-0.2
																		0.979592	0.365854	0.916667	0.957831	0.941176	0.6	-0.890591	0.571429	-0.941176	0.818182	-0.116279	0.6	0.647059	-0.5	-0.368421	-0.666667	0.666667	0.666667	-0.030303	0.18421	-0.675676	0	-0.913044	0.891892	0.123595	0.367089	0.6	0.925926	0.393258	-0.642857		-0.2
																		0.979592	0.365854	0.916667	0.957831	0.941176	0.6	-0.890591	0.571429	-0.941176	0.818182	-0.116279	0.6	0.647059	-0.5	-0.368421	-0.666667	0.666667	0.666667	-0.030303	0.18421	-0.675676	0	-0.913044	0.891892	0.123595	0.367089	0.6	0.925926	0.393258	-0.642857		-0.2
																		0.979592	0.365854	0.916667	0.957831	0.941176	0.6	-0.890591	0.571429	-0.941176	0.818182	-0.116279	0.6	0.647059	-0.5	-0.368421	-0.666667	0.669173	0.666667	-0.030303	0.18421	-0.675676	0	-0.913044	0.891892	0.123595	0.367089	0.6	0.925926	0.393258	-0.642857		-0.2
																		0.979592	0.365854	0.916667	0.957831	0.941176	0.6	-0.890591	0.571429	-0.941176	0.818182	-0.116279	0.6	0.647059	-0.5	-0.368421	-0.666667	0.669173	0.666667	-0.030303	0.18421	-0.675676	0	-0.913044	0.891892	0.123595	0.367089	0.6	0.925926	0.393258	-0.642857		-0.2
																		0.979592	0.365854	0.916667	0.957831	0.941176	0.6	-0.890591	0.571429	-0.941176	0.818182	-0.116279	0.6	0.647059	-0.5	-0.368421	-0.666667	0.669173	0.666667	-0.030303	0.18421	-0.675676	0	-0.913044	0.891892	0.123595	0.367089	0.6	0.925926	0.393258	-0.642857		-0.2
																		0.979592	0.365854	0.916667	0.957831	0.941176	0.6	-0.890591	0.571429	-0.941176	0.818182	-0.116279	0.6	0.647059	-0.5	-0.368421	-0.666667	0.669173	0.666667	-0.030303	0.18421	-0.675676	0	-0.913044	0.891892	0.111111	0.367089	0.6	0.925926	0.393258	-0.642857		-0.2
																		0.979592	0.365854	0.916667	0.957831	0.941176	0.6	-0.890591	0.571429	-0.941176	0.818182	-0.116279	0.6	0.647059	-0.5	-0.368421	-0.666667	0.669173	0.666667	-0.030303	0.18421	-0.675676	0	-0.913044	0.891892	0.111111	0.367089	0.6	0.925926	0.393258	-0.642857		-0.2
																		0.979592	0.365854	0.916667	0.957831	0.941176	0.6	-0.890591	0.571429	-0.941176	0.818182	-0.116279	0.6	0.647059	-0.5	-0.368421	-0.666667	0.669173	0.666667	-0.030303	0.18421	-0.675676	0	-0.913044	0.891892	0.111111	0.367089	0.6	0.925926	0.393258	-0.642857		-0.2
																		0.979592	0.365854	0.916667	0.957831	0.941176	0.6	-0.890591	0.571429	-0.941176	0.818182	-0.116279	0.6	0.647059	-0.5	-0.368421	-0.666667	0.669173	0.666667	-0.030303	0.18421	-0.675676	0	-0.913044	0.891892	0.111111	0.367089	0.6	0.925926	0.393258	-0.533333		-0.2
																		0.979592	0.365854	0.916667	0.957831	0.941176	0.6	-0.890591	0.571429	-0.941176	0.818182	-0.116279	0.6	0.647059	-0.5	-0.368421	-0.666667	0.669173	0.666667	-0.030303	0.18421	-0.675676	0	-0.913044	0.891892	0.111111	0.367089	0.6	0.925926	0.393258	-0.533333		-0.2
																		0.979592	0.365854	0.916667	0.957831	0.941176	0.6	-0.890591	0.571429	-0.941176	0.818182	-0.116279	0.6	0.647059	-0.5	-0.368421	-0.666667	0.669173	0.666667	-0.030303	0.18421	-0.675676	0	-0.913044	0.891892	0.111111	0.367089	0.6	0.925926	0.393258	-0.533333		-0.2
																		0.979592	0.365854	0.916667	0.957831	0.941176	0.6	-0.890591	0.571429	-0.941176	0.818182	-0.116279	0.6	0.647059	-0.5	-0.368421	-0.666667	0.669173	0.666667	-0.030303	0.18421	-0.675676	0	-0.913044	0.891892	0.111111	0.367089	0.6	0.925926	0.393258	-0.533333		-0.2
																		0.979592	0.365854	0.916667	0.957831	0.941176	0.6	-0.890591	0.571429	-0.941176	0.818182	-0.116279	0.6	0.647059	-0.5	-0.368421	-0.666667	0.669173	0.666667	-0.030303	0.18421	-0.675676	0	-0.913044	0.891892	0.111111	0.367089	0.6	0.925926	0.393258	-0.533333		-0.2
																		0.979592	0.365854	0.916667	0.957831	0.941176	0.6	-0.890591	0.571429	-0.941176	0.818182	-0.116279	0.6	0.647059	-0.5	-0.368421	-0.666667	0.669173	0.666667	-0.030303	0.18421	-0.675676	0	-0.913044	0.891892	0.111111	0.375	0.6	0.925926	0.393258	-0.533333		-0.2
																		0.979592	0.365854	0.916667	0.957831	0.941176	0.6	-0.890591	0.571429	-0.941176	0.818182	-0.116279	0.6	0.647059	-0.5	-0.368421	-0.666667	0.669173	0.666667	-0.030303	0.18421	-0.675676	0	-0.913044	0.891892	0.0989011	0.404762	0.6	0.925926	0.393258	-0.533333		-0.2
																		0.979592	0.365854	0.916667	0.957831	0.941176	0.6	-0.890591	0.571429	-0.941176	0.818182	-0.116279	0.6	0.647059	-0.5	-0.368421	-0.666667	0.669173	0.666667	-0.030303	0.18421	-0.675676	0	-0.913044	0.891892	0.0989011	0.404762	0.6	0.925926	0.393258	-0.533333		-0.2
																		0.979592	0.365854	0.916667	0.957831	0.941176	0.6	-0.890591	0.571429	-0.941176	0.818182	-0.0666667	0.6	0.647059	-0.5	-0.368421	-0.666667	0.669173	0.666667	-0.030303	0.18421	-0.675676	0	-0.913044	0.891892	0.0989011	0.411765	0.6	0.925926	0.393258	-0.533333		-0.2
																		0.979592	0.365854	0.916667	0.957831	0.941176	0.6	-0.890591	0.571429	-0.941176	0.818182	-0.0212766	0.6	0.647059	-0.5	-0.368421	-0.666667	0.669173	0.666667	-0.030303	0.18421	-0.675676	0	-0.913044	0.891892	0.0989011	0.411765	0.6	0.925926	0.393258	-0.533333		-0.2
																		0.979592	0.365854	0.916667	0.957831	0.941176	0.6	-0.890591	0.571429	-0.941176	0.818182	0.04	0.6	0.647059	-0.5	-0.368421	-0.666667	0.669173	0.666667	-0.030303	0.18421	-0.675676	0	-0.913044	0.891892	0.0989011	0.411765	0.6	0.925926	0.393258	-0.533333		-0.2
																		0.979592	0.365854	0.916667	0.957831	0.941176	0.6	-0.890591	0.571429	-0.941176	0.818182	0.0588235	0.6	0.647059	-0.5	-0.368421	-0.666667	0.669173	0.666667	-0.030303	0.18421	-0.675676	0	-0.913044	0.891892	0.11828	0.411765	0.6	0.925926	0.393258	-0.533333		-0.2
																		0.979592	0.365854	0.916667	0.957831	0.941176	0.6	-0.890591	0.571429	-0.941176	0.818182	0.0679612	0.6	0.647059	-0.517241	-0.368421	-0.666667	0.669173	0.666667	-0.030303	0.18421	-0.675676	0	-0.913044	0.891892	0.171717	0.411765	0.6	0.925926	0.393258	-0.533333		-0.2
																		0.979592	0.365854	0.916667	0.957831	0.941176	0.6	-0.890591	0.571429	-0.941176	0.818182	0.0857143	0.6	0.647059	-0.517241	-0.368421	-0.666667	0.669173	0.666667	-0.030303	0.18421	-0.675676	0	-0.913044	0.891892	0.171717	0.411765	0.6	0.925926	0.393258	-0.533333		-0.2
																		0.979592	0.365854	0.916667	0.957831	0.941176	0.6	-0.890591	0.571429	-0.941176	0.818182	0.102804	0.6	0.647059	-0.517241	-0.368421	-0.666667	0.669173	0.666667	-0.030303	0.18421	-0.675676	0	-0.913044	0.891892	0.171717	0.411765	0.6	0.925926	0.393258	-0.533333		-0.2
																		0.979592	0.365854	0.916667	0.957831	0.941176	0.6	-0.890591	0.571429	-0.941176	0.818182	0.142857	0.666667	0.647059	-0.517241	-0.368421	-0.666667	0.669173	0.666667	-0.030303	0.18421	-0.675676	0	-0.913044	0.891892	0.171717	0.411765	0.6	0.925926	0.393258	-0.533333		-0.2
																		0.979592	0.365854	0.916667	0.957831	0.941176	0.6	-0.890591	0.571429	-0.941176	0.818182	0.172414	0.666667	0.647059	-0.517241	-0.368421	-0.666667	0.669173	0.666667	-0.030303	0.18421	-0.675676	0	-0.913044	0.891892	0.171717	0.411765	0.6	0.925926	0.393258	-0.533333		-0.2
																		0.979592	0.365854	0.916667	0.957831	0.941176	0.6	-0.890591	0.571429	-0.941176	0.818182	0.213115	0.666667	0.647059	-0.517241	-0.368421	-0.666667	0.669173	0.666667	-0.030303	0.18421	-0.675676	0	-0.913044	0.891892	0.171717	0.411765	0.6	0.925926	0.393258	-0.533333		-0.2
																		0.979592	0.365854	0.916667	0.957831	0.941176	0.6	-0.890591	0.571429	-0.941176	0.818182	0.267176	0.666667	0.647059	-0.517241	-0.368421	-0.666667	0.669173	0.666667	-0.030303	0.18421	-0.675676	0	-0.913044	0.891892	0.171717	0.411765	0.6	0.925926	0.393258	-0.533333		-0.2
																		0.979592	0.365854	0.916667	0.957831	0.941176	0.6	-0.890591	0.571429	-0.941176	0.818182	0.272727	0.666667	0.647059	-0.517241	-0.368421	-0.666667	0.669173	0.666667	-0.030303	0.18421	-0.675676	0	-0.913044	0.891892	0.171717	0.411765	0.6	0.925926	0.393258	-0.533333		-0.2
																		0.979592	0.365854	0.916667	0.957831	0.941176	0.6	-0.890591	0.571429	-0.941176	0.818182	0.272727	0.666667	0.647059	-0.517241	-0.368421	-0.666667	0.669173	0.666667	-0.030303	0.18421	-0.675676	0	-0.913044	0.891892	0.16	0.411765	0.6	0.925926	0.393258	-0.533333		-0.2
																		0.979592	0.365854	0.916667	0.957831	0.941176	0.6	-0.890591	0.571429	-0.941176	0.818182	0.272727	0.666667	0.647059	-0.517241	-0.368421	-0.666667	0.669173	0.666667	-0.030303	0.18421	-0.675676	0	-0.913044	0.891892	0.16	0.411765	0.6	0.925926	0.393258	-0.533333		-0.2
																		0.979592	0.365854	0.916667	0.957831	0.941176	0.6	-0.890591	0.571429	-0.941176	0.818182	0.272727	0.714286	0.647059	-0.517241	-0.368421	-0.666667	0.669173	0.666667	-0.030303	0.18421	-0.675676	0	-0.913044	0.891892	0.16	0.411765	0.6	0.925926	0.393258	-0.533333		-0.2
																		0.979592	0.365854	0.916667	0.957831	0.941176	0.6	-0.890591	0.571429	-0.941176	0.818182	0.272727	0.714286	0.647059	-0.517241	-0.368421	-0.666667	0.669173	0.666667	-0.030303	0.18421	-0.675676	0	-0.913044	0.891892	0.16	0.411765	0.6	0.925926	0.393258	-0.533333		-0.2
																		0.979592	0.365854	0.916667	0.957831	0.941176	0.6	-0.890591	0.571429	-0.941176	0.818182	0.272727	0.714286	0.647059	-0.517241	-0.368421	-0.666667	0.669173	0.666667	-0.030303	0.18421	-0.675676	0	-0.913044	0.891892	0.16	0.411765	0.6	0.925926	0.393258	-0.533333		-0.2
																		0.979592	0.365854	0.916667	0.957831	0.941176	0.6	-0.890591	0.571429	-0.941176	0.818182	0.272727	0.714286	0.647059	-0.517241	-0.368421	-0.666667	0.669173	0.666667	-0.030303	0.18421	-0.675676	0	-0.913044	0.891892	0.16	0.411765	0.6	0.925926	0.393258	-0.533333		-0.2
																		0.979592	0.365854	0.916667	0.957831	0.941176	0.6	-0.890591	0.571429	-0.941176	0.818182	0.272727	0.714286	0.647059	-0.517241	-0.368421	-0.666667	0.669173	0.666667	-0.030303	0.18421	-0.675676	0	-0.913044	0.891892	0.16	0.411765	0.6	0.925926	0.393258	-0.533333		-0.2
																		0.979592	0.365854	0.916667	0.957831	0.941176	0.6	-0.890591	0.571429	-0.941176	0.818182	0.272727	0.714286	0.647059	-0.517241	-0.368421	-0.666667	0.669173	0.666667	-0.030303	0.18421	-0.675676	0	-0.913044	0.891892	0.16	0.411765	0.6	0.925926	0.393258	-0.533333		-0.2
																		0.979592	0.365854	0.916667	0.957831	0.941176	0.6	-0.890591	0.571429	-0.941176	0.818182	0.272727	0.75	0.647059	-0.517241	-0.368421	-0.666667	0.669173	0.666667	-0.030303	0.18421	-0.675676	0	-0.913044	0.896104	0.16	0.411765	0.6	0.925926	0.413044	-0.533333		-0.2
																		0.979592	0.365854	0.916667	0.957831	0.941176	0.6	-0.890591	0.571429	-0.941176	0.818182	0.272727	0.75	0.647059	-0.517241	-0.368421	-0.666667	0.669173	0.666667	-0.030303	0.18421	-0.675676	0	-0.913044	0.905882	0.16	0.411765	0.6	0.925926	0.4375	-0.533333		-0.2
																		0.979592	0.365854	0.916667	0.957831	0.941176	0.6	-0.890591	0.571429	-0.941176	0.818182	0.272727	0.75	0.647059	-0.517241	-0.368421	-0.666667	0.669173	0.666667	-0.030303	0.18421	-0.675676	0	-0.913044	0.913044	0.16	0.411765	0.6	0.925926	0.475728	-0.533333		-0.2
																		0.979592	0.365854	0.916667	0.957831	0.941176	0.6	-0.890591	0.571429	-0.941176	0.818182	0.272727	0.75	0.647059	-0.517241	-0.368421	-0.666667	0.669173	0.666667	-0.030303	0.18421	-0.675676	0	-0.913044	0.913044	0.16	0.411765	0.6	0.925926	0.490566	-0.533333		-0.2
																		0.979592	0.365854	0.916667	0.957831	0.941176	0.6	-0.890591	0.571429	-0.941176	0.818182	0.272727	0.75	0.647059	-0.517241	-0.368421	-0.666667	0.669173	0.666667	-0.030303	0.18421	-0.675676	0	-0.913044	0.913979	0.16	0.411765	0.6	0.925926	0.490566	-0.533333		-0.2
																		0.979592	0.365854	0.916667	0.957831	0.941176	0.6	-0.890591	0.571429	-0.941176	0.818182	0.272727	0.75	0.647059	-0.517241	-0.4	-0.666667	0.669173	0.666667	-0.030303	0.18421	-0.675676	0	-0.913044	0.913979	0.16	0.411765	0.6	0.925926	0.490566	-0.533333		-0.2
																		0.979592	0.365854	0.916667	0.957831	0.941176	0.6	-0.890591	0.571429	-0.941176	0.818182	0.272727	0.75	0.647059	-0.517241	-0.4	-0.666667	0.669173	0.666667	-0.030303	0.18421	-0.675676	0	-0.913044	0.913979	0.16	0.411765	0.6	0.925926	0.490566	-0.533333		-0.2
																		0.979592	0.365854	0.916667	0.957831	0.941176	0.6	-0.890591	0.571429	-0.941176	0.818182	0.272727	0.75	0.647059	-0.517241	-0.4	-0.666667	0.669173	0.666667	-0.030303	0.18421	-0.675676	0	-0.913044	0.913979	0.16	0.411765	0.6	0.925926	0.490566	-0.533333		-0.2
																		0.979592	0.365854	0.916667	0.957831	0.941176	0.6	-0.890591	0.571429	-0.941176	0.818182	0.272727	0.75	0.647059	-0.517241	-0.4	-0.666667	0.669173	0.666667	-0.030303	0.18421	-0.675676	0	-0.913044	0.913979	0.16	0.411765	0.6	0.925926	0.490566	-0.533333		-0.2
																		0.979592	0.365854	0.916667	0.957831	0.941176	0.6	-0.890591	0.571429	-0.941176	0.818182	0.272727	0.75	0.647059	-0.517241	-0.4	-0.666667	0.669173	0.666667	-0.030303	0.18421	-0.675676	0	-0.913044	0.913979	0.16	0.411765	0.6	0.925926	0.490566	-0.533333		-0.2
																		0.979592	0.365854	0.916667	0.957831	0.941176	0.6	-0.890591	0.571429	-0.941176	0.818182	0.272727	0.75	0.647059	-0.517241	-0.4	-0.666667	0.669173	0.666667	-0.030303	0.18421	-0.675676	0	-0.913044	0.913979	0.16	0.411765	0.6	0.925926	0.490566	-0.533333		-0.2
																		0.979592	0.365854	0.916667	0.957831	0.941176	0.6	-0.890591	0.571429	-0.941176	0.818182	0.272727	0.75	0.647059	-0.517241	-0.4	-0.666667	0.669173	0.666667	-0.030303	0.18421	-0.675676	0	-0.913044	0.913979	0.16	0.411765	0.6	0.925926	0.490566	-0.533333		-0.2
																		0.979592	0.365854	0.916667	0.957831	0.941176	0.6	-0.890591	0.571429	-0.941176	0.818182	0.272727	0.75	0.647059	-0.517241	-0.4	-0.666667	0.669173	0.666667	-0.030303	0.18421	-0.675676	0	-0.913044	0.913979	0.16	0.411765	0.6	0.925926	0.490566	-0.533333		-0.2
																		0.979592	0.365854	0.916667	0.957831	0.941176	0.6	-0.890591	0.571429	-0.941176	0.818182	0.272727	0.75	0.647059	-0.517241	-0.4	-0.666667	0.669173	0.666667	-0.030303	0.18421	-0.675676	0	-0.913044	0.913979	0.16	0.411765	0.6	0.925926	0.490566	-0.533333		-0.2
																		0.979592	0.365854	0.916667	0.957831	0.885714	0.6	-0.890591	0.571429	-0.941176	0.818182	0.272727	0.75	0.647059	-0.517241	-0.4	-0.666667	0.669173	0.666667	-0.030303	0.18421	-0.675676	0	-0.913044	0.913979	0.16	0.411765	0.6	0.925926	0.490566	-0.533333		-0.2
																		0.979592	0.365854	0.916667	0.957831	0.833333	0.6	-0.890591	0.571429	-0.941176	0.818182	0.272727	0.75	0.647059	-0.517241	-0.4	-0.666667	0.669173	0.666667	-0.030303	0.18421	-0.675676	0	-0.913044	0.913979	0.16	0.411765	0.6	0.925926	0.490566	-0.533333		-0.2
																		0.979592	0.365854	0.916667	0.957831	0.752212	0.6	-0.890591	0.571429	-0.941176	0.818182	0.272727	0.75	0.647059	-0.517241	-0.4	-0.666667	0.669173	0.666667	-0.030303	0.18421	-0.675676	0	-0.913044	0.913979	0.16	0.411765	0.6	0.925926	0.490566	-0.533333		-0.2
																		0.979592	0.365854	0.916667	0.957831	0.752212	0.6	-0.890591	0.571429	-0.941176	0.818182	0.272727	0.75	0.647059	-0.517241	-0.4	-0.666667	0.669173	0.666667	-0.030303	0.18421	-0.675676	0	-0.913044	0.913979	0.16	0.411765	0.6	0.925926	0.490566	-0.533333		-0.2
																		0.979592	0.365854	0.916667	0.957831	0.752212	0.6	-0.890591	0.571429	-0.941176	0.818182	0.272727	0.75	0.647059	-0.517241	-0.4	-0.666667	0.669173	0.666667	-0.030303	0.18421	-0.675676	0	-0.913044	0.913979	0.16	0.411765	0.6	0.925926	0.490566	-0.533333		-0.2
																		0.979592	0.365854	0.916667	0.957831	0.736842	0.6	-0.890591	0.571429	-0.941176	0.818182	0.272727	0.777778	0.647059	-0.517241	-0.4	-0.666667	0.669173	0.666667	-0.030303	0.18421	-0.675676	0	-0.913044	0.913979	0.16	0.411765	0.6	0.925926	0.490566	-0.533333		-0.2
																		0.979592	0.365854	0.916667	0.957831	0.736842	0.6	-0.890591	0.571429	-0.941176	0.818182	0.272727	0.777778	0.647059	-0.517241	-0.4	-0.666667	0.669173	0.666667	-0.030303	0.18421	-0.675676	0	-0.913044	0.913979	0.16	0.411765	0.6	0.925926	0.490566	-0.533333		-0.2
																		0.979592	0.365854	0.916667	0.957831	0.736842	0.6	-0.890591	0.571429	-0.941176	0.818182	0.272727	0.777778	0.647059	-0.517241	-0.4	-0.666667	0.669173	0.666667	-0.030303	0.18421	-0.675676	0	-0.913044	0.913979	0.16	0.411765	0.6	0.925926	0.490566	-0.533333		-0.2
																		0.979592	0.365854	0.916667	0.957831	0.736842	0.6	-0.890591	0.571429	-0.941176	0.818182	0.272727	0.777778	0.647059	-0.517241	-0.4	-0.666667	0.669173	0.666667	-0.030303	0.18421	-0.675676	0	-0.913044	0.913979	0.16	0.411765	0.6	0.925926	0.490566	-0.533333		-0.2
																		0.979592	0.365854	0.916667	0.957831	0.736842	0.6	-0.890591	0.571429	-0.941176	0.818182	0.272727	0.777778	0.647059	-0.517241	-0.4	-0.666667	0.669173	0.666667	-0.030303	0.18421	-0.675676	0	-0.913044	0.913979	0.16	0.411765	0.6	0.925926	0.490566	-0.533333		-0.2
																		0.979592	0.365854	0.916667	0.957831	0.736842	0.6	-0.890591	0.571429	-0.941176	0.818182	0.272727	0.777778	0.647059	-0.517241	-0.428571	-0.666667	0.669173	0.666667	-0.030303	0.18421	-0.675676	0	-0.913044	0.913979	0.16	0.411765	0.6	0.925926	0.490566	-0.533333		-0.2
																		0.979592	0.365854	0.916667	0.957831	0.736842	0.6	-0.890591	0.571429	-0.941176	0.818182	0.272727	0.777778	0.647059	-0.517241	-0.428571	-0.666667	0.669173	0.666667	-0.030303	0.168831	-0.675676	0	-0.913044	0.913979	0.16	0.411765	0.6	0.925926	0.490566	-0.533333		-0.2
																		0.979592	0.365854	0.916667	0.957831	0.736842	0.6	-0.890591	0.571429	-0.941176	0.818182	0.272727	0.777778	0.647059	-0.517241	-0.428571	-0.666667	0.669173	0.666667	-0.030303	0.0714286	-0.675676	0	-0.913044	0.913979	0.16	0.411765	0.6	0.925926	0.490566	-0.533333		-0.2
																		0.979592	0.365854	0.916667	0.957831	0.73913	0.6	-0.890591	0.571429	-0.941176	0.818182	0.272727	0.777778	0.647059	-0.517241	-0.428571	-0.666667	0.669173	0.666667	-0.030303	0.0714286	-0.675676	0	-0.913044	0.913979	0.16	0.411765	0.6	0.925926	0.490566	-0.533333		-0.2
																		0.979592	0.365854	0.916667	0.957831	0.73913	0.6	-0.890591	0.571429	-0.941176	0.818182	0.272727	0.777778	0.647059	-0.517241	-0.428571	-0.666667	0.669173	0.666667	-0.030303	0.0588235	-0.675676	0	-0.913044	0.913979	0.16	0.411765	0.6	0.925926	0.490566	-0.533333		-0.2
																		0.979592	0.365854	0.916667	0.957831	0.73913	0.6	-0.890591	0.571429	-0.941176	0.818182	0.272727	0.777778	0.647059	-0.517241	-0.428571	-0.666667	0.669173	0.666667	-0.030303	0.0588235	-0.675676	0	-0.913044	0.913979	0.16	0.411765	0.6	0.925926	0.490566	-0.533333		-0.2
																		0.979592	0.365854	0.916667	0.957831	0.73913	0.6	-0.890591	0.571429	-0.941176	0.818182	0.272727	0.777778	0.647059	-0.517241	-0.428571	-0.666667	0.669173	0.666667	-0.030303	0.0588235	-0.675676	0	-0.913044	0.913979	0.16	0.411765	0.6	0.925926	0.490566	-0.533333		-0.2
																		0.979592	0.365854	0.916667	0.957831	0.73913	0.6	-0.890591	0.571429	-0.941176	0.818182	0.272727	0.777778	0.647059	-0.517241	-0.428571	-0.666667	0.669173	0.666667	-0.030303	0.0588235	-0.675676	0	-0.913044	0.913979	0.16	0.411765	0.6	0.925926	0.490566	-0.533333		-0.2
																		0.979592	0.365854	0.916667	0.957831	0.73913	0.6	-0.890591	0.571429	-0.941176	0.818182	0.272727	0.777778	0.647059	-0.517241	-0.428571	-0.666667	0.669173	0.666667	-0.030303	0.0588235	-0.675676	0	-0.913044	0.913979	0.16	0.411765	0.6	0.925926	0.490566	-0.533333		-0.2
																		0.979592	0.365854	0.916667	0.957831	0.73913	0.6	-0.890591	0.571429	-0.941176	0.818182	0.272727	0.777778	0.647059	-0.517241	-0.428571	-0.666667	0.669173	0.666667	-0.030303	0.0588235	-0.675676	0	-0.913044	0.913979	0.16	0.411765	0.6	0.925926	0.490566	-0.533333		-0.2
																		0.979592	0.365854	0.916667	0.957831	0.73913	0.6	-0.890591	0.571429	-0.941176	0.818182	0.208633	0.777778	0.647059	-0.517241	-0.428571	-0.666667	0.669173	0.666667	-0.030303	0.0588235	-0.675676	0	-0.913044	0.913979	0.16	0.411765	0.6	0.925926	0.490566	-0.533333		-0.2
																		0.979592	0.365854	0.916667	0.957831	0.73913	0.6	-0.890591	0.571429	-0.941176	0.818182	0.191489	0.777778	0.647059	-0.517241	-0.428571	-0.666667	0.669173	0.666667	-0.030303	0.0588235	-0.675676	0	-0.913044	0.913979	0.16	0.411765	0.6	0.925926	0.490566	-0.533333		-0.2
																		0.979592	0.365854	0.916667	0.957831	0.73913	0.6	-0.890591	0.571429	-0.941176	0.818182	0.202797	0.777778	0.647059	-0.517241	-0.428571	-0.666667	0.669173	0.666667	-0.030303	0.0588235	-0.675676	0	-0.913044	0.913979	0.16	0.411765	0.6	0.925926	0.490566	-0.533333		-0.2
																		0.979592	0.365854	0.916667	0.957831	0.73913	0.6	-0.890591	0.571429	-0.941176	0.818182	0.234899	0.777778	0.647059	-0.517241	-0.428571	-0.666667	0.669173	0.666667	-0.030303	0.0588235	-0.675676	0	-0.913044	0.913979	0.16	0.411765	0.6	0.925926	0.490566	-0.533333		-0.2
																		0.979592	0.365854	0.916667	0.957831	0.73913	0.6	-0.890591	0.571429	-0.941176	0.818182	0.269231	0.777778	0.647059	-0.517241	-0.428571	-0.666667	0.669173	0.666667	-0.030303	0.0588235	-0.675676	0	-0.913044	0.913979	0.16	0.411765	0.6	0.925926	0.490566	-0.533333		-0.2
																		0.979592	0.365854	0.916667	0.957831	0.73913	0.6	-0.890591	0.571429	-0.941176	0.818182	0.296296	0.8	0.647059	-0.517241	-0.428571	-0.666667	0.669173	0.666667	-0.030303	0.0588235	-0.675676	0	-0.913044	0.913979	0.16	0.411765	0.6	0.925926	0.490566	-0.533333		-0.2
																		0.979592	0.365854	0.916667	0.957831	0.73913	0.6	-0.890591	0.571429	-0.941176	0.818182	0.300613	0.8	0.647059	-0.517241	-0.428571	-0.666667	0.669173	0.666667	-0.030303	0.0588235	-0.675676	0	-0.913044	0.913979	0.16	0.411765	0.6	0.925926	0.490566	-0.533333		-0.2
																		0.979592	0.365854	0.916667	0.957831	0.73913	0.6	-0.890591	0.571429	-0.941176	0.818182	0.300613	0.8	0.647059	-0.517241	-0.428571	-0.666667	0.669173	0.666667	-0.030303	0.0588235	-0.675676	0	-0.913044	0.913979	0.16	0.411765	0.6	0.925926	0.490566	-0.533333		-0.2
																		0.979592	0.365854	0.916667	0.957831	0.73913	0.6	-0.890591	0.571429	-0.941176	0.818182	0.304878	0.8	0.647059	-0.517241	-0.428571	-0.666667	0.669173	0.666667	-0.030303	0.0588235	-0.675676	0	-0.913044	0.913979	0.16	0.411765	0.6	0.925926	0.490566	-0.533333		-0.2
																		0.979592	0.365854	0.916667	0.957831	0.73913	0.6	-0.890591	0.571429	-0.941176	0.818182	0.304878	0.8	0.647059	-0.517241	-0.428571	-0.666667	0.669173	0.666667	-0.030303	0.0588235	-0.675676	0	-0.913044	0.913979	0.16	0.411765	0.6	0.925926	0.490566	-0.533333		-0.2
																		0.979592	0.365854	0.916667	0.957831	0.73913	0.6	-0.890591	0.571429	-0.941176	0.818182	0.304878	0.8	0.647059	-0.517241	-0.428571	-0.666667	0.669173	0.666667	-0.030303	0.0588235	-0.675676	0	-0.913044	0.913979	0.16	0.411765	0.6	0.925926	0.490566	-0.533333		-0.2
																		0.979592	0.365854	0.916667	0.957831	0.73913	0.6	-0.890591	0.571429	-0.941176	0.818182	0.304878	0.8	0.647059	-0.517241	-0.428571	-0.666667	0.669173	0.666667	-0.030303	0.0588235	-0.675676	0	-0.913044	0.913979	0.16	0.411765	0.6	0.925926	0.490566	-0.533333		-0.2
																		0.979592	0.365854	0.916667	0.957831	0.73913	0.6	-0.890591	0.571429	-0.941176	0.818182	0.304878	0.8	0.647059	-0.517241	-0.428571	-0.666667	0.669173	0.666667	-0.030303	0.0588235	-0.675676	0	-0.913044	0.913979	0.16	0.411765	0.6	0.925926	0.490566	-0.533333		-0.2
																		0.979592	0.365854	0.916667	0.957831	0.73913	0.6	-0.890591	0.571429	-0.941176	0.818182	0.304878	0.8	0.647059	-0.517241	-0.428571	-0.666667	0.669173	0.666667	-0.030303	0.0588235	-0.675676	0	-0.913044	0.913979	0.16	0.411765	0.6	0.925926	0.490566	-0.533333		-0.2
																		0.979592	0.365854	0.916667	0.957831	0.73913	0.6	-0.890591	0.571429	-0.941176	0.818182	0.304878	0.8	0.647059	-0.517241	-0.428571	-0.666667	0.669173	0.666667	-0.030303	0.0588235	-0.675676	0	-0.913044	0.913979	0.16	0.411765	0.6	0.925926	0.490566	-0.533333		-0.2
																		0.979592	0.365854	0.916667	0.957831	0.73913	0.6	-0.890591	0.571429	-0.941176	0.818182	0.304878	0.8	0.647059	-0.517241	-0.428571	-0.666667	0.669173	0.666667	-0.030303	0.0588235	-0.675676	0	-0.913044	0.913979	0.16	0.411765	0.6	0.925926	0.490566	-0.533333		-0.2
																		0.979592	0.365854	0.916667	0.957831	0.73913	0.6	-0.890591	0.549296	-0.941176	0.818182	0.304878	0.818182	0.647059	-0.517241	-0.428571	-0.666667	0.669173	0.666667	-0.030303	0.0588235	-0.675676	0	-0.913044	0.913979	0.16	0.411765	0.6	0.925926	0.490566	-0.533333		-0.2
																		0.979592	0.365854	0.916667	0.957831	0.73913	0.6	-0.890591	0.549296	-0.941176	0.818182	0.304878	0.818182	0.647059	-0.517241	-0.428571	-0.666667	0.669173	0.666667	-0.030303	0.0588235	-0.675676	0	-0.913044	0.913979	0.16	0.411765	0.6	0.925926	0.490566	-0.533333		-0.2
																		0.979592	0.365854	0.916667	0.957831	0.73913	0.6	-0.890591	0.549296	-0.941176	0.818182	0.304878	0.818182	0.647059	-0.517241	-0.428571	-0.666667	0.669173	0.666667	-0.030303	0.0588235	-0.675676	0	-0.913044	0.913979	0.16	0.411765	0.6	0.925926	0.490566	-0.533333		-0.2
																		0.979592	0.365854	0.916667	0.957831	0.73913	0.6	-0.890591	0.549296	-0.941176	0.818182	0.304878	0.818182	0.647059	-0.517241	-0.428571	-0.666667	0.669173	0.666667	-0.030303	0.0588235	-0.692308	0	-0.913044	0.913979	0.16	0.411765	0.6	0.925926	0.490566	-0.533333		-0.2
																		0.979592	0.365854	0.916667	0.957831	0.73913	0.6	-0.890591	0.549296	-0.941176	0.818182	0.304878	0.818182	0.647059	-0.517241	-0.428571	-0.666667	0.669173	0.666667	-0.030303	0.0588235	-0.692308	0	-0.913044	0.913979	0.16	0.411765	0.6	0.925926	0.490566	-0.533333		-0.2
																		0.979592	0.365854	0.916667	0.957831	0.73913	0.6	-0.890591	0.549296	-0.941176	0.818182	0.304878	0.818182	0.647059	-0.517241	-0.428571	-0.666667	0.669173	0.666667	-0.030303	0.0588235	-0.692308	0	-0.913044	0.913979	0.16	0.411765	0.6	0.925926	0.490566	-0.533333		-0.2
																		0.979592	0.365854	0.916667	0.957831	0.73913	0.6	-0.890591	0.549296	-0.941176	0.818182	0.304878	0.818182	0.647059	-0.517241	-0.428571	-0.666667	0.669173	0.666667	-0.030303	0.0588235	-0.692308	0	-0.913044	0.913979	0.16	0.411765	0.6	0.925926	0.490566	-0.533333		-0.2
																		0.979592	0.365854	0.916667	0.957831	0.73913	0.6	-0.890591	0.549296	-0.941176	0.818182	0.304878	0.818182	0.647059	-0.517241	-0.428571	-0.666667	0.669173	0.666667	-0.030303	0.0588235	-0.692308	0	-0.913044	0.913979	0.16	0.411765	0.6	0.925926	0.490566	-0.533333		-0.2
																		0.979592	0.365854	0.916667	0.957831	0.73913	0.6	-0.890591	0.549296	-0.941176	0.818182	0.304878	0.818182	0.647059	-0.517241	-0.428571	-0.666667	0.669173	0.666667	-0.030303	0.0588235	-0.692308	0	-0.913044	0.913979	0.16	0.411765	0.6	0.925926	0.490566	-0.533333		-0.2
																		0.979592	0.365854	0.916667	0.957831	0.73913	0.6	-0.890591	0.549296	-0.941176	0.833333	0.304878	0.818182	0.647059	-0.517241	-0.428571	-0.666667	0.669173	0.666667	-0.030303	0.0588235	-0.692308	0	-0.913044	0.913979	0.16	0.411765	0.6	0.925926	0.490566	-0.533333		-0.2
																		0.979592	0.365854	0.916667	0.957831	0.73913	0.6	-0.890591	0.549296	-0.941176	0.833333	0.304878	0.833333	0.647059	-0.517241	-0.428571	-0.666667	0.669173	0.666667	-0.030303	0.0588235	-0.692308	0	-0.913044	0.913979	0.16	0.411765	0.6	0.925926	0.490566	-0.533333		-0.2
																		0.979592	0.365854	0.916667	0.957831	0.73913	0.6	-0.890591	0.549296	-0.941176	0.833333	0.304878	0.833333	0.647059	-0.517241	-0.428571	-0.666667	0.669173	0.666667	-0.030303	0.0588235	-0.692308	0	-0.913044	0.913979	0.16	0.411765	0.6	0.925926	0.490566	-0.533333		-0.2
																		0.979592	0.365854	0.916667	0.957831	0.73913	0.6	-0.890591	0.549296	-0.941176	0.84	0.304878	0.833333	0.647059	-0.517241	-0.428571	-0.666667	0.669173	0.666667	-0.030303	0.0588235	-0.692308	0	-0.913044	0.913979	0.16	0.411765	0.6	0.925926	0.490566	-0.533333		-0.2
																		0.979592	0.365854	0.916667	0.957831	0.73913	0.6	-0.890591	0.549296	-0.941176	0.851852	0.304878	0.833333	0.647059	-0.517241	-0.428571	-0.666667	0.669173	0.666667	-0.030303	0.0588235	-0.692308	0	-0.913044	0.913979	0.16	0.411765	0.6	0.925926	0.490566	-0.533333		-0.2
																		0.979592	0.365854	0.916667	0.957831	0.73913	0.6	-0.890591	0.549296	-0.941176	0.870968	0.304878	0.833333	0.647059	-0.517241	-0.428571	-0.666667	0.669173	0.666667	-0.030303	0.0588235	-0.692308	0	-0.913044	0.913979	0.16	0.411765	0.6	0.925926	0.490566	-0.533333		-0.2
																		0.979592	0.365854	0.916667	0.957831	0.73913	0.6	-0.890591	0.549296	-0.941176	0.878788	0.304878	0.833333	0.647059	-0.517241	-0.428571	-0.666667	0.669173	0.666667	-0.030303	0.0588235	-0.692308	0	-0.913044	0.913979	0.16	0.411765	0.6	0.925926	0.490566	-0.533333		-0.2
																		0.979592	0.365854	0.916667	0.957831	0.73913	0.6	-0.890591	0.549296	-0.941176	0.878788	0.304878	0.833333	0.647059	-0.517241	-0.428571	-0.666667	0.669173	0.666667	-0.030303	0.0588235	-0.692308	0	-0.913044	0.913979	0.16	0.411765	0.6	0.925926	0.490566	-0.533333		-0.2
																		0.979592	0.365854	0.916667	0.957831	0.73913	0.6	-0.890591	0.549296	-0.941176	0.878788	0.304878	0.833333	0.647059	-0.517241	-0.428571	-0.666667	0.669173	0.666667	-0.030303	0.0588235	-0.692308	0	-0.913044	0.913979	0.16	0.411765	0.6	0.925926	0.490566	-0.533333		-0.2
																		0.979592	0.365854	0.916667	0.957831	0.73913	0.6	-0.890591	0.549296	-0.941176	0.878788	0.29697	0.833333	0.647059	-0.517241	-0.428571	-0.666667	0.669173	0.666667	-0.030303	0.0588235	-0.692308	0	-0.913044	0.913979	0.16	0.411765	0.6	0.925926	0.490566	-0.533333		-0.2
																		0.979592	0.365854	0.916667	0.951952	0.73913	0.6	-0.890591	0.549296	-0.941176	0.878788	0.266272	0.833333	0.647059	-0.517241	-0.428571	-0.666667	0.669173	0.666667	-0.030303	0.0588235	-0.692308	0	-0.913044	0.913979	0.16	0.411765	0.6	0.925926	0.490566	-0.533333		-0.2
																		0.979592	0.365854	0.916667	0.951952	0.73913	0.6	-0.890591	0.549296	-0.941176	0.878788	0.258823	0.833333	0.647059	-0.517241	-0.428571	-0.666667	0.669173	0.666667	-0.030303	0.0588235	-0.692308	0	-0.913044	0.913979	0.16	0.411765	0.6	0.925926	0.490566	-0.533333		-0.2
																		0.979592	0.365854	0.916667	0.951952	0.73913	0.6	-0.890591	0.549296	-0.941176	0.878788	0.258823	0.833333	0.647059	-0.517241	-0.428571	-0.666667	0.669173	0.666667	-0.030303	0.0588235	-0.692308	0	-0.913044	0.913979	0.16	0.411765	0.6	0.925926	0.490566	-0.533333		-0.2
																		0.979592	0.365854	0.916667	0.951952	0.73913	0.6	-0.890591	0.549296	-0.941176	0.878788	0.251462	0.833333	0.647059	-0.517241	-0.428571	-0.666667	0.669173	0.666667	-0.030303	0.0588235	-0.692308	0	-0.913044	0.913979	0.16	0.411765	0.6	0.925926	0.490566	-0.533333		-0.2
																		0.979592	0.365854	0.916667	0.951952	0.73913	0.6	-0.890591	0.549296	-0.941176	0.878788	0.251462	0.833333	0.647059	-0.517241	-0.428571	-0.666667	0.669173	0.666667	-0.030303	0.0588235	-0.692308	0	-0.913044	0.913979	0.16	0.411765	0.6	0.925926	0.490566	-0.533333		-0.2
																		0.979592	0.365854	0.916667	0.951952	0.73913	0.6	-0.890591	0.549296	-0.941176	0.878788	0.251462	0.833333	0.647059	-0.517241	-0.428571	-0.666667	0.669173	0.666667	-0.030303	0.0588235	-0.692308	0	-0.913044	0.913979	0.16	0.411765	0.6	0.925926	0.490566	-0.533333		-0.2
																		0.979592	0.365854	0.916667	0.951952	0.73913	0.6	-0.890591	0.549296	-0.941176	0.878788	0.251462	0.833333	0.647059	-0.517241	-0.428571	-0.666667	0.669173	0.666667	-0.030303	0.0588235	-0.692308	0	-0.913044	0.913979	0.16	0.411765	0.6	0.925926	0.490566	-0.533333		-0.2
																		0.979592	0.365854	0.916667	0.951952	0.73913	0.6	-0.890591	0.549296	-0.941176	0.885714	0.251462	0.846154	0.647059	-0.517241	-0.428571	-0.666667	0.669173	0.666667	-0.030303	0.0588235	-0.692308	0	-0.913044	0.913979	0.16	0.411765	0.6	0.925926	0.490566	-0.533333		-0.2
																		0.979592	0.365854	0.916667	0.951952	0.73913	0.6	-0.890591	0.549296	-0.941176	0.885714	0.251462	0.846154	0.647059	-0.517241	-0.428571	-0.666667	0.669173	0.666667	-0.030303	0.0588235	-0.692308	0	-0.913044	0.913979	0.16	0.411765	0.6	0.925926	0.490566	-0.533333		-0.2
																		0.979592	0.365854	0.916667	0.951952	0.73913	0.6	-0.890591	0.549296	-0.941176	0.891892	0.251462	0.857143	0.647059	-0.517241	-0.428571	-0.666667	0.669173	0.666667	-0.030303	0.0588235	-0.692308	0	-0.913044	0.913979	0.16	0.411765	0.6	0.925926	0.490566	-0.533333		-0.2
																		0.979592	0.365854	0.916667	0.951952	0.73913	0.6	-0.890591	0.549296	-0.941176	0.891892	0.251462	0.866667	0.647059	-0.517241	-0.428571	-0.666667	0.669173	0.666667	-0.030303	0.0588235	-0.692308	0	-0.913044	0.913979	0.16	0.411765	0.6	0.925926	0.490566	-0.533333		-0.2
																		0.979592	0.365854	0.916667	0.951952	0.73913	0.6	-0.890591	0.549296	-0.941176	0.891892	0.251462	0.866667	0.647059	-0.517241	-0.428571	-0.666667	0.669173	0.666667	-0.030303	0.0588235	-0.692308	0	-0.913044	0.913979	0.16	0.411765	0.6	0.925926	0.490566	-0.533333		-0.2
																		0.979592	0.365854	0.916667	0.951952	0.73913	0.6	-0.890591	0.549296	-0.941176	0.891892	0.251462	0.866667	0.647059	-0.517241	-0.428571	-0.666667	0.669173	0.666667	-0.030303	0.0588235	-0.692308	0	-0.913044	0.913979	0.16	0.411765	0.6	0.925926	0.490566	-0.533333		-0.2
																		0.979592	0.365854	0.916667	0.951952	0.73913	0.6	-0.890591	0.549296	-0.941176	0.897436	0.251462	0.866667	0.647059	-0.517241	-0.428571	-0.666667	0.669173	0.666667	-0.030303	0.0588235	-0.692308	0	-0.913044	0.913979	0.16	0.411765	0.6	0.925926	0.490566	-0.533333		-0.2
																		0.979592	0.365854	0.916667	0.951952	0.73913	0.6	-0.890591	0.549296	-0.941176	0.902439	0.244186	0.866667	0.647059	-0.517241	-0.428571	-0.666667	0.669173	0.666667	-0.030303	0.0588235	-0.692308	0	-0.913044	0.913979	0.16	0.411765	0.6	0.925926	0.490566	-0.533333		-0.2
																		0.979592	0.365854	0.916667	0.951952	0.73913	0.6	-0.890591	0.549296	-0.941176	0.902439	0.229885	0.866667	0.647059	-0.517241	-0.428571	-0.666667	0.669173	0.666667	-0.030303	0.0588235	-0.692308	0	-0.913044	0.913979	0.16	0.411765	0.6	0.925926	0.490566	-0.533333		-0.2
																		0.979592	0.365854	0.916667	0.951952	0.73913	0.6	-0.890591	0.549296	-0.941176	0.904762	0.229885	0.866667	0.647059	-0.517241	-0.428571	-0.666667	0.669173	0.666667	-0.030303	0.0588235	-0.692308	0	-0.913044	0.913979	0.16	0.411765	0.6	0.925926	0.490566	-0.533333		-0.2
																		0.979592	0.365854	0.916667	0.951952	0.73913	0.6	-0.890591	0.549296	-0.941176	0.909091	0.229885	0.866667	0.647059	-0.517241	-0.428571	-0.666667	0.669173	0.666667	-0.030303	0.0588235	-0.692308	0	-0.913044	0.913979	0.16	0.411765	0.6	0.925926	0.490566	-0.533333		-0.2
																		0.979592	0.365854	0.916667	0.951952	0.73913	0.6	-0.890591	0.549296	-0.941176	0.909091	0.229885	0.866667	0.647059	-0.517241	-0.428571	-0.666667	0.669173	0.666667	-0.030303	0.0588235	-0.692308	0	-0.913044	0.913979	0.16	0.411765	0.6	0.925926	0.490566	-0.533333		-0.2
																		0.979592	0.365854	0.916667	0.951952	0.73913	0.6	-0.890591	0.549296	-0.941176	0.909091	0.229885	0.866667	0.647059	-0.517241	-0.428571	-0.666667	0.669173	0.666667	-0.030303	0.0588235	-0.692308	0	-0.913044	0.913979	0.16	0.411765	0.6	0.925926	0.490566	-0.533333		-0.2
																		0.979592	0.365854	0.916667	0.951952	0.73913	0.6	-0.890591	0.549296	-0.941176	0.918367	0.229885	0.866667	0.647059	-0.517241	-0.428571	-0.666667	0.669173	0.666667	-0.030303	0.0588235	-0.692308	0	-0.913044	0.913979	0.16	0.411765	0.6	0.925926	0.490566	-0.533333		-0.2
																		0.979592	0.365854	0.916667	0.951952	0.73913	0.6	-0.890591	0.549296	-0.941176	0.92	0.229885	0.866667	0.647059	-0.517241	-0.428571	-0.666667	0.669173	0.666667	-0.030303	0.0588235	-0.692308	0	-0.913044	0.913979	0.16	0.411765	0.6	0.925926	0.490566	-0.533333		-0.2
																		0.979592	0.365854	0.916667	0.951952	0.73913	0.6	-0.890591	0.549296	-0.941176	0.925926	0.229885	0.866667	0.647059	-0.517241	-0.428571	-0.666667	0.669173	0.666667	-0.030303	0.0588235	-0.692308	0	-0.913044	0.913979	0.16	0.411765	0.6	0.925926	0.490566	-0.533333		-0.2
																		0.979592	0.365854	0.916667	0.951952	0.73913	0.6	-0.890591	0.466667	-0.941176	0.928571	0.229885	0.866667	0.647059	-0.517241	-0.428571	-0.666667	0.669173	0.666667	-0.030303	0.0588235	-0.692308	0	-0.913044	0.913979	0.16	0.411765	0.6	0.925926	0.490566	-0.533333		-0.2
																		0.979592	0.365854	0.916667	0.951952	0.73913	0.6	-0.890591	0.358025	-0.941176	0.935484	0.229885	0.866667	0.647059	-0.517241	-0.428571	-0.666667	0.669173	0.666667	-0.030303	0.0588235	-0.692308	0	-0.913044	0.913979	0.16	0.411765	0.6	0.925926	0.490566	-0.533333		-0.2
																		0.979592	0.365854	0.916667	0.951952	0.73913	0.6	-0.890591	0.358025	-0.941176	0.9375	0.229885	0.866667	0.647059	-0.517241	-0.428571	-0.666667	0.669173	0.666667	-0.030303	0.0588235	-0.692308	0	-0.913044	0.913979	0.16	0.411765	0.6	0.925926	0.490566	-0.533333		-0.2
																		0.979592	0.365854	0.916667	0.951952	0.73913	0.6	-0.890591	0.341463	-0.941176	0.938461	0.229885	0.866667	0.647059	-0.517241	-0.428571	-0.428571	0.669173	0.666667	-0.030303	0.0588235	-0.692308	0	-0.913044	0.913979	0.16	0.411765	0.6	0.925926	0.490566	-0.533333		-0.2
																		0.979592	0.365854	0.916667	0.951952	0.73913	0.6	-0.890591	0.341463	-0.941176	0.938461	0.229885	0.866667	0.647059	-0.517241	-0.428571	-0.428571	0.669173	0.666667	-0.030303	0.0588235	-0.692308	0	-0.913044	0.913979	0.16	0.411765	0.6	0.925926	0.490566	-0.533333		-0.2
																		0.979592	0.365854	0.916667	0.951952	0.73913	0.6	-0.890591	0.341463	-0.941176	0.938461	0.229885	0.75	0.647059	-0.533333	-0.428571	-0.428571	0.669173	0.666667	-0.030303	0.0588235	-0.692308	0	-0.913044	0.913979	0.16	0.411765	0.6	0.925926	0.490566	-0.533333		-0.2
																		0.979592	0.365854	0.916667	0.951952	0.73913	0.6	-0.890591	0.341463	-0.941176	0.938461	0.229885	0.75	0.647059	-0.533333	-0.428571	-0.25	0.669173	0.666667	-0.030303	0.0588235	-0.692308	0	-0.913044	0.913979	0.16	0.411765	0.6	0.925926	0.490566	-0.533333		-0.2
																		0.979592	0.365854	0.916667	0.951952	0.73913	0.6	-0.890591	0.341463	-0.941176	0.938461	0.229885	0.75	0.647059	-0.533333	-0.428571	-0.25	0.669173	0.666667	-0.030303	0.0588235	-0.692308	0	-0.913044	0.913979	0.16	0.411765	0.6	0.925926	0.490566	-0.533333		-0.2
																		0.979592	0.365854	0.916667	0.951952	0.73913	0.6	-0.890591	0.341463	-0.941176	0.938461	0.229885	0.75	0.647059	-0.533333	-0.428571	-0.25	0.669173	0.666667	-0.030303	0.0588235	-0.692308	0	-0.913044	0.913979	0.16	0.411765	0.6	0.925926	0.490566	-0.533333		-0.2
																		0.979592	0.365854	0.916667	0.951952	0.73913	0.6	-0.890591	0.341463	-0.941176	0.938461	0.229885	0.647059	0.647059	-0.533333	-0.428571	-0.25	0.669173	0.666667	-0.030303	0.0588235	-0.692308	0	-0.913044	0.913979	0.16	0.411765	0.6	0.925926	0.495327	-0.533333		-0.2
																		0.979592	0.365854	0.916667	0.951952	0.73913	0.6	-0.890591	0.341463	-0.941176	0.938461	0.229885	0.647059	0.647059	-0.533333	-0.428571	-0.25	0.669173	0.666667	-0.030303	0.0588235	-0.692308	0	-0.913044	0.913979	0.16	0.411765	0.6	0.925926	0.522124	-0.533333		-0.2
																		0.979592	0.365854	0.916667	0.951952	0.73913	0.6	-0.890591	0.341463	-0.941176	0.938461	0.229885	0.647059	0.647059	-0.533333	-0.428571	-0.25	0.669173	0.666667	-0.030303	0.0588235	-0.692308	0	-0.913044	0.913979	0.16	0.411765	0.6	0.925926	0.542373	-0.533333		-0.2
																		0.979592	0.365854	0.916667	0.951952	0.73913	0.6	-0.890591	0.341463	-0.941176	0.938461	0.229885	0.647059	0.647059	-0.533333	-0.428571	-0.25	0.669173	0.666667	-0.030303	0.0588235	-0.692308	0	-0.913044	0.913979	0.16	0.411765	0.6	0.925926	0.571429	-0.533333		-0.2
																		0.979592	0.365854	0.916667	0.951952	0.73913	0.6	-0.890591	0.341463	-0.941176	0.938461	0.229885	0.647059	0.647059	-0.533333	-0.428571	-0.25	0.669173	0.666667	-0.030303	0.0588235	-0.692308	0	-0.913044	0.913979	0.176471	0.411765	0.6	0.925926	0.571429	-0.533333		-0.2
																		0.979592	0.365854	0.916667	0.951952	0.73913	0.6	-0.890591	0.341463	-0.941176	0.938461	0.229885	0.647059	0.647059	-0.533333	-0.428571	-0.25	0.669173	0.666667	-0.030303	0.0588235	-0.692308	0	-0.913044	0.913979	0.176471	0.411765	0.6	0.925926	0.571429	-0.533333		-0.2
																		0.979592	0.365854	0.916667	0.951952	0.73913	0.6	-0.890591	0.341463	-0.941176	0.938461	0.229885	0.647059	0.647059	-0.533333	-0.428571	-0.25	0.669173	0.666667	-0.030303	0.0588235	-0.692308	0	-0.913044	0.913979	0.165048	0.411765	0.6	0.925926	0.571429	-0.533333		-0.2
																		0.979592	0.365854	0.916667	0.951952	0.73913	0.6	-0.890591	0.341463	-0.941176	0.938461	0.215909	0.647059	0.647059	-0.533333	-0.428571	-0.25	0.669173	0.714286	-0.030303	0.0588235	-0.692308	0	-0.913044	0.913979	0.165048	0.411765	0.6	0.925926	0.571429	-0.533333		-0.2
																		0.979592	0.365854	0.916667	0.951952	0.73913	0.6	-0.890591	0.341463	-0.941176	0.938461	0.215909	0.647059	0.647059	-0.533333	-0.428571	-0.25	0.669173	0.714286	-0.030303	0.0588235	-0.692308	0	-0.913044	0.913979	0.165048	0.411765	0.6	0.925926	0.571429	-0.533333		-0.2
																		0.979592	0.365854	0.916667	0.951952	0.73913	0.6	-0.890591	0.341463	-0.941176	0.938461	0.215909	0.647059	0.647059	-0.533333	-0.428571	-0.25	0.669173	0.714286	-0.030303	0.0588235	-0.692308	0	-0.913044	0.913979	0.165048	0.411765	0.6	0.925926	0.571429	-0.533333		-0.2
																		0.979592	0.365854	0.916667	0.951952	0.73913	0.6	-0.890591	0.341463	-0.941176	0.938461	0.215909	0.647059	0.647059	-0.533333	-0.428571	-0.25	0.669173	0.714286	-0.030303	0.0588235	-0.692308	0	-0.913044	0.913979	0.165048	0.411765	0.6	0.925926	0.571429	-0.533333		-0.2
																		0.979592	0.365854	0.916667	0.951952	0.73913	0.6	-0.890591	0.341463	-0.941176	0.938461	0.215909	0.647059	0.647059	-0.533333	-0.428571	-0.25	0.669173	0.714286	-0.030303	0.0588235	-0.692308	0	-0.913044	0.913979	0.165048	0.411765	-0.111111	0.925926	0.571429	-0.533333		-0.2
																		0.979592	0.365854	0.916667	0.951952	0.73913	0.6	-0.890591	0.341463	-0.941176	0.938461	0.215909	0.647059	0.647059	-0.533333	-0.428571	-0.25	0.669173	0.714286	-0.030303	0.0588235	-0.692308	0	-0.913044	0.913979	0.165048	0.411765	-0.272727	0.925926	0.571429	-0.533333		-0.2
																		0.979592	0.365854	0.916667	0.951952	0.73913	0.6	-0.890591	0.341463	-0.941176	0.938461	0.215909	0.647059	0.647059	-0.533333	-0.428571	-0.25	0.669173	0.714286	-0.030303	0.0588235	-0.692308	0	-0.913044	0.913979	0.165048	0.411765	-0.5	0.925926	0.571429	-0.533333		-0.2
																		0.979592	0.365854	0.916667	0.951952	0.73913	0.6	-0.890591	0.341463	-0.941176	0.938461	0.169399	0.647059	0.647059	-0.533333	-0.428571	-0.25	0.669173	0.714286	-0.030303	0.0588235	-0.692308	0	-0.913044	0.913979	0.165048	0.411765	-0.68	0.925926	0.571429	-0.533333		-0.2
																		0.979592	0.365854	0.916667	0.951952	0.73913	0.6	-0.890591	0.341463	-0.941176	0.938461	0.169399	0.647059	0.647059	-0.533333	-0.428571	-0.25	0.669173	0.714286	-0.030303	0.0588235	-0.692308	0	-0.913044	0.913979	0.165048	0.411765	-0.692308	0.925926	0.571429	-0.533333		-0.2
																		0.979592	0.365854	0.916667	0.951952	0.73913	0.6	-0.890591	0.341463	-0.941176	0.938461	0.169399	0.647059	0.647059	-0.533333	-0.428571	-0.25	0.669173	0.714286	-0.030303	0.0588235	-0.692308	0	-0.913044	0.913979	0.165048	0.411765	-0.692308	0.925926	0.571429	-0.533333		-0.2
																		0.979592	0.365854	0.916667	0.951952	0.73913	0.6	-0.890591	0.341463	-0.941176	0.938461	0.169399	0.666667	0.647059	-0.533333	-0.428571	-0.25	0.669173	0.714286	-0.030303	0.0588235	-0.692308	0	-0.913044	0.913979	0.165048	0.411765	-0.692308	0.925926	0.571429	-0.533333		-0.2
																		0.979592	0.365854	0.916667	0.951952	0.73913	0.6	-0.890591	0.341463	-0.941176	0.938461	0.169399	0.666667	0.647059	-0.533333	-0.428571	-0.25	0.669173	0.714286	-0.030303	0.0588235	-0.692308	0	-0.913044	0.913979	0.165048	0.411765	-0.692308	0.925926	0.571429	-0.533333		-0.2
																		0.979592	0.365854	0.916667	0.951952	0.73913	0.6	-0.890591	0.341463	-0.941176	0.938461	0.169399	0.666667	0.647059	-0.533333	-0.428571	-0.25	0.669173	0.714286	-0.030303	0.0588235	-0.692308	0	-0.913044	0.913979	0.165048	0.411765	-0.692308	0.925926	0.571429	-0.533333		-0.2
																		0.979592	0.365854	0.916667	0.951952	0.73913	0.6	-0.890591	0.341463	-0.941176	0.938461	0.169399	0.666667	0.647059	-0.533333	-0.428571	-0.25	0.671642	0.714286	-0.030303	0.0588235	-0.692308	0	-0.913044	0.913979	0.165048	0.411765	-0.692308	0.925926	0.571429	-0.533333		-0.2
																		0.979592	0.365854	0.916667	0.951952	0.73913	0.6	-0.890591	0.341463	-0.941176	0.938461	0.169399	0.666667	0.647059	-0.533333	-0.428571	-0.25	0.671642	0.714286	-0.030303	0.0588235	-0.692308	0	-0.913044	0.913979	0.165048	0.411765	-0.692308	0.925926	0.571429	-0.533333		-0.2
																		0.979592	0.365854	0.916667	0.951952	0.73913	0.6	-0.890591	0.341463	-0.941176	0.938461	0.169399	0.666667	0.647059	-0.533333	-0.428571	-0.25	0.671642	0.714286	-0.030303	0.0588235	-0.692308	0	-0.913044	0.913979	0.165048	0.411765	-0.692308	0.925926	0.571429	-0.533333		-0.2
																		0.979592	0.365854	0.916667	0.951952	0.73913	0.6	-0.890591	0.341463	-0.941176	0.938461	0.169399	0.666667	0.647059	-0.533333	-0.428571	-0.25	0.671642	0.714286	-0.0588235	0.0588235	-0.692308	0	-0.913044	0.913979	0.165048	0.411765	-0.692308	0.925926	0.571429	-0.533333		-0.2
																		0.979592	0.365854	0.916667	0.951952	0.73913	0.6	-0.890591	0.341463	-0.941176	0.938461	0.169399	0.666667	0.647059	-0.533333	-0.428571	-0.25	0.671642	0.714286	-0.0588235	0.0588235	-0.692308	0	-0.913044	0.913979	0.165048	0.411765	-0.692308	0.925926	0.571429	-0.533333		-0.2
																		0.979592	0.365854	0.916667	0.951952	0.73913	0.6	-0.890591	0.341463	-0.941176	0.938461	0.169399	0.666667	0.647059	-0.533333	-0.428571	0	0.671642	0.714286	-0.0588235	0.0588235	-0.692308	0	-0.913044	0.913979	0.165048	0.411765	-0.692308	0.925926	0.571429	-0.533333		-0.2
																		0.979592	0.365854	0.916667	0.951952	0.73913	0.6	-0.890591	0.341463	-0.941176	0.938461	0.169399	0.666667	0.647059	-0.533333	-0.428571	0	0.671642	0.714286	-0.0588235	0.0588235	-0.692308	0	-0.913044	0.913979	0.165048	0.411765	-0.692308	0.925926	0.571429	-0.533333		-0.2
																		0.979592	0.365854	0.916667	0.951952	0.741379	0.6	-0.890591	0.341463	-0.941176	0.938461	0.169399	0.666667	0.647059	-0.533333	-0.428571	0	0.671642	0.714286	-0.0588235	0.0588235	-0.692308	0	-0.913044	0.893617	0.165048	0.411765	-0.692308	0.925926	0.571429	-0.533333		-0.2
																		0.979592	0.365854	0.916667	0.951952	0.741379	0.6	-0.890591	0.341463	-0.941176	0.938461	0.169399	0.666667	0.647059	-0.533333	-0.428571	0	0.671642	0.714286	-0.0588235	0.0588235	-0.692308	0	-0.913044	0.762376	0.165048	0.411765	-0.692308	0.925926	0.571429	-0.533333		-0.2
																		0.979592	0.365854	0.916667	0.951952	0.741379	0.6	-0.890591	0.341463	-0.941176	0.938461	0.169399	0.666667	0.647059	-0.533333	-0.428571	0	0.671642	0.714286	-0.0588235	0.0588235	-0.692308	0	-0.913044	0.762376	0.165048	0.411765	-0.692308	0.925926	0.571429	-0.533333		-0.2
																		0.979592	0.365854	0.916667	0.951952	0.741379	0.6	-0.890591	0.341463	-0.941176	0.938461	0.169399	0.666667	0.647059	-0.533333	-0.428571	0	0.671642	0.714286	-0.0588235	0.0588235	-0.692308	0	-0.913044	0.762376	0.165048	0.411765	-0.692308	0.925926	0.571429	-0.533333		-0.2
																		0.979592	0.365854	0.916667	0.951952	0.741379	0.6	-0.890591	0.341463	-0.941176	0.938461	0.169399	0.666667	0.647059	-0.533333	-0.428571	0	0.671642	0.714286	-0.0588235	0.0588235	-0.692308	0	-0.913044	0.762376	0.165048	0.411765	-0.692308	0.925926	0.571429	-0.533333		-0.2
																		0.979592	0.365854	0.916667	0.951952	0.741379	0.6	-0.890591	0.341463	-0.941176	0.938461	0.169399	0.666667	0.647059	-0.533333	-0.428571	0	0.671642	0.714286	-0.0588235	0.0588235	-0.692308	0	-0.913044	0.762376	0.165048	0.411765	-0.692308	0.925926	0.571429	-0.533333		-0.2
																		0.979592	0.365854	0.916667	0.951952	0.741379	0.6	-0.890591	0.341463	-0.941176	0.938461	0.169399	0.666667	0.647059	-0.533333	-0.428571	0	0.671642	0.714286	-0.0588235	0.0588235	-0.692308	0	-0.913044	0.762376	0.165048	0.411765	-0.692308	0.925926	0.571429	-0.533333		-0.2
																		0.979592	0.365854	0.916667	0.951952	0.741379	0.6	-0.890591	0.341463	-0.941176	0.938461	0.169399	0.684211	0.647059	-0.533333	-0.428571	0	0.671642	0.714286	-0.0588235	0.0588235	-0.692308	0	-0.913044	0.618182	0.165048	0.411765	-0.692308	0.925926	0.571429	-0.533333		-0.2
																		0.979592	0.365854	0.916667	0.951952	0.741379	0.6	-0.890591	0.341463	-0.941176	0.938461	0.169399	0.684211	0.647059	-0.483871	-0.428571	0	0.671642	0.714286	-0.0588235	0.0588235	-0.692308	0	-0.913044	0.618182	0.165048	0.411765	-0.692308	0.925926	0.571429	-0.533333		-0.2
																		0.979592	0.365854	0.916667	0.951952	0.741379	0.6	-0.890591	0.341463	-0.941176	0.938461	0.169399	0.7	0.647059	-0.483871	-0.428571	0	0.671642	0.714286	-0.0588235	0.0588235	-0.692308	0	-0.913044	0.625	0.165048	0.411765	-0.692308	0.925926	0.571429	-0.533333		-0.2
																		0.979592	0.365854	0.916667	0.951952	0.74359	0.6	-0.890591	0.341463	-0.941176	0.938461	0.169399	0.7	0.647059	-0.483871	-0.428571	0	0.671642	0.714286	-0.0588235	0.0588235	-0.692308	0	-0.913044	0.625	0.165048	0.411765	-0.692308	0.925926	0.571429	-0.533333		-0.2
																		0.979592	0.365854	0.916667	0.951952	0.74359	0.6	-0.890591	0.341463	-0.941176	0.938461	0.169399	0.714286	0.647059	-0.483871	-0.428571	0	0.671642	0.714286	-0.0588235	0.0588235	-0.692308	0	-0.913044	0.625	0.165048	0.411765	-0.692308	0.925926	0.571429	-0.533333		-0.2
																		0.979592	0.365854	0.916667	0.951952	0.74359	0.6	-0.890591	0.341463	-0.941176	0.938461	0.169399	0.714286	0.647059	-0.483871	-0.428571	0	0.671642	0.714286	-0.0588235	0.0588235	-0.692308	0	-0.913044	0.625	0.165048	0.411765	-0.692308	0.925926	0.571429	-0.533333		-0.2
																		0.979592	0.365854	0.916667	0.951952	0.74359	0.6	-0.890591	0.341463	-0.941176	0.938461	0.169399	0.714286	0.647059	-0.483871	-0.428571	0	0.671642	0.714286	-0.0588235	0.0588235	-0.692308	0	-0.913044	0.625	0.165048	0.411765	-0.692308	0.925926	0.571429	-0.533333		-0.2
																		0.979592	0.365854	0.916667	0.951952	0.74359	0.6	-0.890591	0.341463	-0.941176	0.938461	0.169399	0.714286	0.647059	-0.483871	-0.428571	0	0.671642	0.714286	-0.0588235	0.0588235	-0.692308	0	-0.913044	0.625	0.165048	0.411765	-0.419355	0.925926	0.571429	-0.533333		-0.2
																		0.979592	0.365854	0.916667	0.951952	0.74359	0.6	-0.890591	0.341463	-0.941176	0.938461	0.169399	0.714286	0.647059	-0.483871	-0.428571	0	0.671642	0.714286	-0.0588235	0.0588235	-0.692308	0	-0.913044	0.625	0.165048	0.411765	-0.189189	0.925926	0.571429	-0.533333		-0.2
																		0.979592	0.365854	0.916667	0.951952	0.74359	0.6	-0.890591	0.341463	-0.941176	0.938461	0.169399	0.714286	0.647059	-0.483871	-0.428571	0	0.671642	0.714286	-0.0588235	0.0588235	-0.692308	0	-0.913044	0.625	0.165048	0.411765	-0.0731707	0.925926	0.571429	-0.533333		-0.2
																		0.979592	0.365854	0.916667	0.951952	0.74359	0.6	-0.890591	0.341463	-0.941176	0.938461	0.169399	0.714286	0.647059	-0.483871	-0.428571	0	0.671642	0.714286	-0.0588235	0.0588235	-0.692308	0	-0.913044	0.625	0.165048	0.411765	0	0.925926	0.571429	-0.533333		-0.2
																		0.979592	0.365854	0.916667	0.951952	0.74359	0.6	-0.890591	0.341463	-0.941176	0.938461	0.195767	0.714286	0.647059	-0.483871	-0.428571	0	0.671642	0.714286	-0.0588235	0.0588235	-0.692308	0	-0.913044	0.625	0.165048	0.411765	0.137255	0.925926	0.571429	-0.533333		-0.2
																		0.979592	0.365854	0.916667	0.951952	0.74359	0.6	-0.890591	0.341463	-0.941176	0.938461	0.216495	0.714286	0.647059	-0.483871	-0.428571	0	0.671642	0.714286	-0.0588235	0.0588235	-0.692308	0	-0.913044	0.625	0.165048	0.411765	0.241379	0.925926	0.571429	-0.533333		-0.2
																		0.979592	0.365854	0.916667	0.951952	0.74359	0.6	-0.890591	0.341463	-0.941176	0.938461	0.236181	0.714286	0.647059	-0.483871	-0.428571	0	0.671642	0.714286	-0.0588235	0.0588235	-0.692308	0	-0.913044	0.625	0.165048	0.411765	0.241379	0.925926	0.571429	-0.533333		-0.2
																		0.979592	0.365854	0.916667	0.951952	0.74359	0.6	-0.890591	0.341463	-0.941176	0.938461	0.24	0.714286	0.647059	-0.483871	-0.428571	0	0.671642	0.714286	-0.0588235	0.0588235	-0.692308	0	-0.913044	0.625	0.165048	0.411765	0.241379	0.925926	0.571429	-0.533333		-0.2
																		0.979592	0.365854	0.916667	0.951952	0.74359	0.6	-0.890591	0.341463	-0.941176	0.938461	0.24	0.714286	0.647059	-0.483871	-0.428571	0	0.671642	0.714286	-0.0588235	0.0588235	-0.692308	0	-0.913044	0.625	0.165048	0.411765	0.241379	0.925926	0.571429	-0.533333		-0.2
																		0.979592	0.365854	0.916667	0.951952	0.74359	0.6	-0.890591	0.341463	-0.941176	0.938461	0.24	0.714286	0.647059	-0.483871	-0.428571	0	0.671642	0.714286	-0.0588235	0.0588235	-0.692308	0	-0.913044	0.625	0.165048	0.411765	0.241379	0.925926	0.571429	-0.533333		-0.2
																		0.979592	0.365854	0.916667	0.951952	0.74359	0.6	-0.890591	0.341463	-0.941176	0.938461	0.247525	0.714286	0.647059	-0.483871	-0.428571	0	0.671642	0.714286	-0.0588235	0.0588235	-0.692308	0	-0.913044	0.625	0.165048	0.411765	0.241379	0.925926	0.571429	-0.533333		-0.2
																		0.979592	0.365854	0.916667	0.951952	0.74359	0.6	-0.890591	0.341463	-0.941176	0.938461	0.254902	0.714286	0.647059	-0.483871	-0.428571	0	0.671642	0.714286	-0.0588235	0.0588235	-0.692308	0	-0.913044	0.625	0.165048	0.411765	0.241379	0.925926	0.571429	-0.533333		-0.2
																		0.979592	0.365854	0.916667	0.951952	0.74359	0.6	-0.890591	0.341463	-0.941176	0.938461	0.262136	0.714286	0.647059	-0.483871	-0.428571	0	0.671642	0.714286	-0.0588235	0.0588235	-0.692308	0	-0.913044	0.625	0.165048	0.411765	0.241379	0.925926	0.571429	-0.533333		-0.2
																		0.979592	0.365854	0.916667	0.951952	0.74359	0.6	-0.890591	0.341463	-0.941176	0.938461	0.272727	0.714286	0.647059	-0.483871	-0.428571	0	0.671642	0.714286	-0.0588235	0.0588235	-0.692308	0	-0.913044	0.625	0.165048	0.411765	0.241379	0.925926	0.571429	-0.533333		-0.2
																		0.979592	0.365854	0.916667	0.951952	0.74359	0.6	-0.890591	0.341463	-0.941176	0.938461	0.279621	0.714286	0.647059	-0.483871	-0.428571	0	0.671642	0.714286	-0.0588235	0.0588235	-0.692308	0	-0.913044	0.625	0.165048	0.411765	0.241379	0.925926	0.571429	-0.533333		-0.2
																		0.979592	0.365854	0.916667	0.951952	0.74359	0.6	-0.890591	0.341463	-0.941176	0.938461	0.279621	0.714286	0.647059	-0.483871	-0.428571	0	0.671642	0.714286	-0.0588235	0.0588235	-0.692308	0	-0.913044	0.625	0.165048	0.411765	0.241379	0.925926	0.571429	-0.533333		-0.2
																		0.979592	0.365854	0.916667	0.940299	0.74359	0.6	-0.890591	0.341463	-0.941176	0.938461	0.283019	0.714286	0.647059	-0.483871	-0.428571	0	0.671642	0.714286	-0.0588235	0.0588235	-0.692308	0	-0.913044	0.625	0.165048	0.411765	0.241379	0.925926	0.571429	-0.533333		-0.2
																		0.979592	0.365854	0.916667	0.928783	0.74359	0.6	-0.890591	0.341463	-0.941176	0.938461	0.286385	0.714286	0.647059	-0.483871	-0.428571	0	0.671642	0.714286	-0.0588235	0.0588235	-0.692308	0	-0.913044	0.625	0.165048	0.411765	0.241379	0.925926	0.571429	-0.533333		-0.2
																		0.979592	0.365854	0.916667	0.928783	0.74359	0.6	-0.890591	0.341463	-0.941176	0.938461	0.305936	0.714286	0.647059	-0.483871	-0.428571	0	0.671642	0.714286	-0.0588235	0.0588235	-0.692308	0	-0.913044	0.625	0.165048	0.411765	0.241379	0.925926	0.571429	-0.533333		-0.2
																		0.979592	0.365854	0.916667	0.928783	0.74359	0.6	-0.890591	0.341463	-0.941176	0.938461	0.327434	0.714286	0.647059	-0.483871	-0.428571	0	0.671642	0.714286	-0.0588235	0.0588235	-0.692308	0	-0.913044	0.625	0.165048	0.411765	0.241379	0.925926	0.571429	-0.533333		-0.2
																		0.979592	0.365854	0.916667	0.928783	0.74359	0.6	-0.890591	0.341463	-0.941176	0.938461	0.327434	0.714286	0.647059	-0.483871	-0.428571	0	0.671642	0.714286	-0.0588235	0.0588235	-0.692308	0	-0.913044	0.625	0.165048	0.411765	0.241379	0.925926	0.571429	-0.533333		-0.2
																		0.979592	0.365854	0.916667	0.928783	0.74359	0.6	-0.890591	0.341463	-0.941176	0.938461	0.31579	0.73913	0.647059	-0.483871	-0.428571	0	0.671642	0.714286	-0.0588235	0.0588235	-0.692308	0	-0.913044	0.625	0.165048	0.411765	0.241379	0.925926	0.571429	-0.533333		-0.2
																		0.979592	0.365854	0.916667	0.928783	0.74359	0.6	-0.890591	0.341463	-0.941176	0.938461	0.31579	0.73913	0.647059	-0.483871	-0.428571	0	0.671642	0.714286	-0.0588235	0.0588235	-0.692308	0	-0.913044	0.625	0.165048	0.411765	0.241379	0.925926	0.571429	-0.533333		-0.2
																		0.979592	0.365854	0.916667	0.928783	0.74359	0.6	-0.890591	0.341463	-0.941176	0.938461	0.31579	0.73913	0.647059	-0.483871	-0.428571	0	0.671642	0.714286	-0.0588235	0.0588235	-0.692308	0	-0.913044	0.625	0.165048	0.411765	0.241379	0.925926	0.571429	-0.533333		-0.2
																		0.979592	0.365854	0.916667	0.928783	0.74359	0.6	-0.890591	0.341463	-0.941176	0.938461	0.31579	0.73913	0.647059	-0.483871	-0.428571	0	0.671642	0.714286	-0.0588235	0.0588235	-0.692308	0	-0.913044	0.625	0.165048	0.411765	0.241379	0.925926	0.571429	-0.533333		-0.2
																		0.979592	0.365854	0.916667	0.928783	0.74359	0	-0.890591	0.341463	-0.941176	0.938461	0.31579	0.73913	0.647059	-0.483871	-0.428571	0	0.671642	0.714286	-0.0588235	0.0588235	-0.692308	0	-0.913044	0.625	0.165048	0.411765	0.241379	0.925926	0.571429	-0.533333		-0.2
																		0.979592	0.365854	0.916667	0.928783	0.74359	-0.111111	-0.890591	0.341463	-0.941176	0.938461	0.31579	0.73913	0.647059	-0.483871	-0.428571	0	0.671642	0.714286	-0.0588235	0.0588235	-0.692308	0	-0.913044	0.625	0.165048	0.411765	0.241379	0.925926	0.571429	-0.533333		-0.2
																		0.979592	0.365854	0.916667	0.928783	0.74359	-0.272727	-0.890591	0.341463	-0.941176	0.938461	0.31579	0.73913	0.647059	-0.483871	-0.428571	0	0.671642	0.714286	-0.0588235	0.0588235	-0.692308	0	-0.913044	0.625	0.165048	0.411765	0.241379	0.925926	0.571429	-0.533333		-0.2
																		0.979592	0.365854	0.916667	0.928783	0.74359	-0.407407	-0.890591	0.341463	-0.941176	0.938461	0.31579	0.73913	0.647059	-0.483871	-0.428571	0	0.671642	0.714286	-0.0588235	0.0588235	-0.692308	0	-0.913044	0.625	0.165048	0.411765	0.241379	0.925926	0.571429	-0.533333		-0.2
																		0.979592	0.365854	0.916667	0.928783	0.74359	-0.466667	-0.890591	0.341463	-0.941176	0.938461	0.31579	0.73913	0.647059	-0.483871	-0.428571	0	0.671642	0.714286	-0.0588235	0.0588235	-0.692308	0	-0.913044	0.625	0.165048	0.411765	0.241379	0.925926	0.571429	-0.533333		-0.2
																		0.979592	0.365854	0.916667	0.928783	0.74359	-0.529412	-0.890591	0.341463	-0.941176	0.938461	0.31579	0.73913	0.647059	-0.483871	-0.428571	0	0.671642	0.714286	-0.0588235	0.0588235	-0.692308	0	-0.913044	0.625	0.165048	0.411765	0.241379	0.925926	0.571429	-0.533333		-0.2
																		0.979592	0.365854	0.916667	0.928783	0.745763	-0.578947	-0.890591	0.341463	-0.941176	0.938461	0.31579	0.73913	0.647059	-0.483871	-0.428571	0.375	0.671642	0.714286	-0.0588235	0.0588235	-0.692308	0	-0.913044	0.625	0.165048	0.411765	0.241379	0.925926	0.571429	-0.533333		-0.2
																		0.979592	0.333333	0.916667	0.928783	0.745763	-0.627907	-0.890591	0.341463	-0.941176	0.938461	0.31579	0.73913	0.647059	-0.483871	-0.428571	0.444445	0.671642	0.714286	-0.0588235	0.0588235	-0.692308	0	-0.913044	0.625	0.165048	0.411765	0.241379	0.925926	0.571429	-0.533333		-0.2
																		0.979592	0.302326	0.916667	0.928783	0.745763	-0.666667	-0.890591	0.341463	-0.941176	0.938461	0.31579	0.73913	0.647059	-0.483871	-0.428571	0.545455	0.671642	0.714286	-0.0588235	0.0588235	-0.692308	0	-0.913044	0.625	0.165048	0.411765	0.241379	0.925926	0.571429	-0.533333		-0.2
																		0.979592	0.302326	0.916667	0.928783	0.745763	-0.703704	-0.890591	0.341463	-0.941176	0.938461	0.31579	0.73913	0.647059	-0.483871	-0.428571	0.642857	0.671642	0.714286	-0.0588235	0.0588235	-0.692308	0	-0.913044	0.625	0.165048	0.411765	0.241379	0.925926	0.571429	-0.533333		-0.2
																		0.979592	0.302326	0.916667	0.928783	0.745763	-0.719298	-0.890591	0.341463	-0.941176	0.938461	0.31579	0.73913	0.647059	-0.483871	-0.428571	0.655172	0.671642	0.714286	-0.0588235	0.0588235	-0.692308	0	-0.913044	0.625	0.165048	0.411765	0.241379	0.925926	0.571429	-0.533333		-0.2
																		0.979592	0.302326	0.916667	0.928783	0.745763	-0.728814	-0.890591	0.341463	-0.941176	0.938461	0.31579	0.73913	0.647059	-0.483871	-0.428571	0.655172	0.671642	0.714286	-0.0588235	0.0588235	-0.692308	0	-0.913044	0.625	0.165048	0.411765	0.241379	0.925926	0.571429	-0.533333		-0.2
																		0.979592	0.302326	0.916667	0.928783	0.745763	-0.728814	-0.890591	0.341463	-0.941176	0.938461	0.318777	0.73913	0.647059	-0.483871	-0.428571	0.655172	0.671642	0.714286	-0.0588235	0.0588235	-0.692308	0	-0.913044	0.625	0.165048	0.411765	0.241379	0.925926	0.571429	-0.533333		-0.2
																		0.979592	0.302326	0.916667	0.923077	0.745763	-0.728814	-0.890591	0.341463	-0.941176	0.938461	0.318777	0.73913	0.647059	-0.483871	-0.428571	0.655172	0.671642	0.714286	-0.0588235	0.0588235	-0.692308	0	-0.913044	0.625	0.165048	0.411765	0.241379	0.925926	0.571429	-0.533333		-0.2
																		0.979592	0.302326	0.916667	0.923077	0.745763	-0.728814	-0.890591	0.341463	-0.941176	0.938461	0.318777	0.73913	0.647059	-0.483871	-0.428571	0.655172	0.671642	0.714286	-0.0588235	0.0588235	-0.692308	0	-0.913044	0.625	0.165048	0.411765	0.241379	0.925926	0.571429	-0.533333		-0.2
																		0.979592	0.302326	0.916667	0.923077	0.745763	-0.728814	-0.890591	0.341463	-0.941176	0.938461	0.318777	0.73913	0.647059	-0.483871	-0.428571	0.655172	0.671642	0.714286	-0.0588235	0.0588235	-0.692308	0	-0.913044	0.625	0.165048	0.411765	0.241379	0.925926	0.571429	-0.533333		-0.2
																		0.979592	0.302326	0.916667	0.923077	0.745763	-0.728814	-0.890591	0.341463	-0.941176	0.938461	0.318777	0.73913	0.647059	-0.483871	-0.428571	0.655172	0.671642	0.714286	-0.0588235	0.0588235	-0.692308	0	-0.913044	0.625	0.165048	0.411765	0.241379	0.925926	0.571429	-0.533333		-0.2
																		0.979592	0.302326	0.916667	0.923077	0.745763	-0.728814	-0.890591	0.341463	-0.941176	0.938461	0.318777	0.73913	0.647059	-0.483871	-0.428571	0.655172	0.671642	0.714286	-0.0588235	0.0588235	-0.692308	0	-0.913044	0.625	0.153846	0.411765	0.241379	0.925926	0.571429	-0.533333		-0.2
																		0.979592	0.302326	0.916667	0.923077	0.745763	-0.728814	-0.890591	0.341463	-0.941176	0.938461	0.318777	0.73913	0.647059	-0.483871	-0.428571	0.655172	0.671642	0.714286	-0.0588235	0.0588235	-0.692308	0	-0.913044	0.625	0.153846	0.411765	0.241379	0.925926	0.571429	-0.533333		-0.2
																		0.979592	0.302326	0.916667	0.923077	0.745763	-0.728814	-0.891068	0.341463	-0.941176	0.938461	0.318777	0.73913	0.647059	-0.483871	-0.428571	0.655172	0.671642	0.714286	-0.0588235	0.0588235	-0.692308	0	-0.913044	0.625	0.153846	0.411765	0.241379	0.925926	0.534884	-0.533333		-0.2
																		0.979592	0.302326	0.916667	0.923077	0.745763	-0.728814	-0.891068	0.341463	-0.941176	0.938461	0.318777	0.73913	0.647059	-0.483871	-0.428571	0.655172	0.671642	0.714286	-0.0588235	0.0588235	-0.692308	0	-0.913044	0.625	0.153846	0.411765	0.241379	0.925926	0.534884	-0.533333		-0.2
																		0.979592	0.302326	0.916667	0.923077	0.745763	-0.728814	-0.891068	0.341463	-0.941176	0.938461	0.318777	0.73913	0.647059	-0.483871	-0.428571	0.655172	0.671642	0.714286	-0.0588235	0.0588235	-0.692308	0	-0.913044	0.625	0.153846	0.411765	0.241379	0.925926	0.534884	-0.533333		-0.2
																		0.979592	0.302326	0.916667	0.923077	0.745763	-0.728814	-0.891068	0.341463	-0.941176	0.938461	0.318777	0.73913	0.647059	-0.483871	-0.428571	0.655172	0.671642	0.714286	-0.0588235	0.0588235	-0.692308	0	-0.913044	0.625	0.153846	0.411765	0.241379	0.925926	0.534884	-0.533333		-0.2
																		0.979592	0.302326	0.916667	0.923077	0.747899	-0.728814	-0.891068	0.341463	-0.941176	0.938461	0.318777	0.73913	0.647059	-0.483871	-0.428571	0.655172	0.671642	0.714286	-0.0588235	0.0588235	-0.692308	0	-0.913044	0.625	0.153846	0.411765	0.241379	0.925926	0.534884	-0.533333		-0.2
																		0.979592	0.302326	0.916667	0.923077	0.747899	-0.728814	-0.891068	0.341463	-0.941176	0.938461	0.318777	0.73913	0.647059	-0.483871	-0.428571	0.655172	0.671642	0.714286	-0.0588235	0.0588235	-0.692308	0	-0.913044	0.625	0.153846	0.411765	0.241379	0.925926	0.534884	-0.533333		-0.2
																		0.979592	0.302326	0.916667	0.923077	0.747899	-0.728814	-0.891068	0.341463	-0.941176	0.938461	0.318777	0.73913	0.647059	-0.483871	-0.428571	0.655172	0.659259	0.714286	-0.0588235	0.0588235	-0.692308	0	-0.913044	0.625	0.153846	0.411765	0.241379	0.925926	0.534884	-0.533333		-0.2
																		0.979592	0.302326	0.916667	0.923077	0.747899	-0.728814	-0.891068	0.341463	-0.941176	0.938461	0.318777	0.73913	0.647059	-0.483871	-0.428571	0.655172	0.659259	0.714286	-0.0588235	0.0588235	-0.692308	0	-0.913044	0.625	0.153846	0.411765	0.241379	0.925926	0.534884	-0.533333		-0.2
																		0.979592	0.302326	0.916667	0.923077	0.747899	-0.728814	-0.891068	0.341463	-0.941176	0.938461	0.318777	0.73913	0.647059	-0.483871	-0.428571	0.655172	0.659259	0.714286	-0.0588235	0.0588235	-0.692308	0	-0.913044	0.625	0.153846	0.411765	0.241379	0.925926	0.534884	-0.533333		-0.2
																		0.979592	0.302326	0.916667	0.923077	0.747899	-0.728814	-0.891068	0.341463	-0.941176	0.938461	0.318777	0.73913	0.647059	-0.483871	-0.428571	0.655172	0.659259	0.714286	-0.0588235	0.0588235	-0.692308	0	-0.913044	0.625	0.153846	0.411765	0.241379	0.925926	0.534884	-0.533333		-0.2
																		0.979592	0.302326	0.916667	0.923077	0.747899	-0.728814	-0.891068	0.341463	-0.941176	0.938461	0.318777	0.73913	0.647059	-0.483871	-0.428571	0.655172	0.659259	0.714286	-0.0588235	0.0588235	-0.692308	0	-0.913044	0.625	0.153846	0.411765	0.241379	0.925926	0.534884	-0.533333		-0.2
																		0.979592	0.302326	0.916667	0.923077	0.747899	-0.728814	-0.891068	0.341463	-0.941176	0.938461	0.318777	0.73913	0.647059	-0.483871	-0.428571	0.655172	0.659259	0.714286	-0.0588235	0.0588235	-0.692308	0	-0.913044	0.625	0.153846	0.411765	0.241379	0.925926	0.534884	-0.533333		-0.2
																		0.979592	0.302326	0.916667	0.923077	0.747899	-0.728814	-0.891068	0.341463	-0.941176	0.938461	0.318777	0.73913	0.647059	-0.483871	-0.428571	0.655172	0.659259	0.714286	-0.0588235	0.0588235	-0.692308	0	-0.913044	0.625	0.153846	0.411765	0.241379	0.925926	0.534884	-0.533333		-0.2
																		0.979592	0.302326	0.916667	0.923077	0.747899	-0.728814	-0.891068	0.341463	-0.941176	0.938461	0.318777	0.73913	0.647059	-0.483871	-0.428571	0.655172	0.659259	0.714286	-0.0588235	0.0588235	-0.692308	0	-0.913044	0.625	0.153846	0.411765	0.241379	0.925926	0.534884	-0.533333		-0.2
																		0.979592	0.302326	0.916667	0.923077	0.747899	-0.728814	-0.891068	0.341463	-0.941176	0.938461	0.318777	0.73913	0.647059	-0.483871	-0.428571	0.655172	0.659259	0.714286	-0.0588235	0.0588235	-0.692308	0	-0.913044	0.625	0.153846	0.411765	0.241379	0.925926	0.534884	-0.533333		-0.2
																		0.979592	0.302326	0.916667	0.923077	0.747899	-0.728814	-0.891068	0.341463	-0.941176	0.938461	0.318777	0.73913	0.647059	-0.483871	-0.428571	0.655172	0.659259	0.714286	-0.0588235	0.0588235	-0.692308	0	-0.913044	0.625	0.153846	0.411765	0.241379	0.925926	0.534884	-0.533333		-0.2
																		0.979592	0.302326	0.916667	0.923077	0.747899	-0.728814	-0.891068	0.341463	-0.941176	0.938461	0.318777	0.73913	0.647059	-0.483871	-0.428571	0.655172	0.659259	0.714286	-0.0588235	0.0588235	-0.692308	0	-0.913044	0.625	0.153846	0.411765	0.241379	0.925926	0.534884	-0.533333		-0.2
																		0.979592	0.302326	0.916667	0.923077	0.747899	-0.728814	-0.891068	0.341463	-0.941176	0.938461	0.318777	0.73913	0.647059	-0.483871	-0.428571	0.655172	0.659259	0.714286	-0.0588235	0.0588235	-0.692308	0	-0.913044	0.625	0.153846	0.411765	0.241379	0.733333	0.534884	-0.533333		-0.2
																		0.979592	0.302326	0.916667	0.923077	0.747899	-0.728814	-0.891068	0.341463	-0.941176	0.938461	0.318777	0.73913	0.647059	-0.483871	-0.428571	0.655172	0.659259	0.714286	-0.0588235	0.0588235	-0.692308	0	-0.913044	0.625	0.153846	0.411765	0.241379	0.575758	0.534884	-0.533333		-0.2
																		0.979592	0.302326	0.916667	0.923077	0.747899	-0.728814	-0.891068	0.341463	-0.941176	0.938461	0.318777	0.73913	0.647059	-0.483871	-0.428571	0.655172	0.659259	0.714286	-0.0588235	0.0588235	-0.692308	0	-0.913044	0.625	0.153846	0.411765	0.241379	0.529412	0.534884	-0.533333		-0.2
																		0.979592	0.302326	0.916667	0.923077	0.747899	-0.672131	-0.891068	0.341463	-0.941176	0.938461	0.318777	0.6	0.647059	-0.483871	-0.428571	0.655172	0.659259	0.714286	-0.0588235	0.0588235	-0.692308	0	-0.913044	0.625	0.153846	0.411765	0.241379	0.333333	0.534884	-0.533333		-0.2
																		0.979592	0.302326	0.916667	0.923077	0.747899	-0.619048	-0.891068	0.341463	-0.941176	0.938461	0.318777	0.6	0.647059	-0.483871	-0.428571	0.655172	0.659259	0.714286	-0.0588235	0.0588235	-0.692308	0	-0.913044	0.625	0.153846	0.411765	0.241379	0.268293	0.534884	-0.533333		-0.2
																		0.979592	0.302326	0.916667	0.923077	0.747899	-0.522388	-0.891068	0.341463	-0.941176	0.938461	0.318777	0.6	0.647059	-0.483871	-0.428571	0.655172	0.659259	0.714286	-0.0588235	0.0588235	-0.692308	0	-0.913044	0.625	0.153846	0.411765	0.241379	0.130435	0.534884	-0.533333		-0.2
																		0.979592	0.302326	0.916667	0.923077	0.747899	-0.378378	-0.891068	0.341463	-0.941176	0.938461	0.318777	0.6	0.647059	-0.483871	-0.428571	0.655172	0.659259	0.714286	-0.0588235	0.0588235	-0.692308	0	-0.913044	0.625	0.153846	0.411765	0.241379	0.0612245	0.534884	-0.533333		-0.2
																		0.979592	0.302326	0.916667	0.923077	0.747899	-0.307692	-0.891068	0.341463	-0.941176	0.938461	0.318777	0.6	0.647059	-0.483871	-0.428571	0.655172	0.659259	0.714286	-0.0588235	0.0588235	-0.692308	0	-0.913044	0.625	0.153846	0.411765	0.241379	0.04	0.534884	-0.533333		-0.2
																		0.979592	0.302326	0.916667	0.923077	0.747899	-0.228916	-0.891068	0.341463	-0.941176	0.938461	0.318777	0.6	0.647059	-0.483871	-0.428571	0.655172	0.659259	0.714286	-0.0588235	0.0588235	-0.692308	0	-0.913044	0.625	0.153846	0.411765	0.241379	0.04	0.534884	-0.533333		-0.2
																		0.979592	0.302326	0.916667	0.923077	0.747899	-0.146067	-0.891068	0.341463	-0.941176	0.938461	0.318777	0.6	0.647059	-0.483871	-0.428571	0.655172	0.659259	0.714286	-0.0588235	0.0588235	-0.692308	0	-0.913044	0.625	0.153846	0.411765	0.241379	0.04	0.534884	-0.533333		-0.2
																		0.979592	0.302326	0.916667	0.923077	0.747899	-0.0851064	-0.891068	0.341463	-0.941176	0.938461	0.318777	0.6	0.647059	-0.483871	-0.428571	0.655172	0.659259	0.714286	-0.0588235	0.0588235	-0.692308	0	-0.913044	0.625	0.153846	0.411765	0.241379	0.04	0.534884	-0.533333		-0.2
																		0.979592	0.302326	0.916667	0.923077	0.747899	-0.0408163	-0.891068	0.341463	-0.941176	0.938461	0.318777	0.6	0.647059	-0.483871	-0.428571	0.655172	0.659259	0.714286	-0.0588235	0.0588235	-0.692308	0	-0.913044	0.625	0.153846	0.411765	0.241379	0.04	0.534884	-0.533333		-0.2
																		0.979592	0.302326	0.916667	0.923077	0.747899	0	-0.891068	0.341463	-0.941176	0.938461	0.318777	0.6	0.647059	-0.483871	-0.428571	0.655172	0.661765	0.714286	-0.0588235	0.0588235	-0.692308	0	-0.913044	0.625	0.153846	0.411765	0.241379	0.04	0.534884	-0.533333		-0.2
																		0.979592	0.302326	0.916667	0.923077	0.747899	0.0285714	-0.891068	0.341463	-0.941176	0.938461	0.318777	0.6	0.647059	-0.483871	-0.428571	0.655172	0.661765	0.714286	-0.0588235	0.0588235	-0.692308	0	-0.913044	0.625	0.153846	0.411765	0.241379	0.04	0.534884	-0.533333		-0.2
																		0.979592	0.302326	0.916667	0.923077	0.747899	0.0642202	-0.891068	0.341463	-0.941176	0.938461	0.318777	0.6	0.647059	-0.5	-0.428571	0.655172	0.661765	0.714286	-0.0588235	0.0588235	-0.692308	0	-0.913044	0.625	0.153846	0.411765	0.241379	0.04	0.534884	-0.533333		-0.2
																		0.979592	0.302326	0.916667	0.923077	0.747899	0.0727273	-0.891068	0.341463	-0.941176	0.938461	0.318777	0.6	0.647059	-0.5	-0.428571	0.655172	0.661765	0.714286	-0.0588235	0.0588235	-0.692308	0	-0.913044	0.625	0.153846	0.411765	0.241379	0.04	0.534884	-0.533333		-0.2
																		0.979592	0.302326	0.916667	0.923077	0.747899	0.0727273	-0.891068	0.341463	-0.941176	0.938461	0.318777	0.6	0.647059	-0.5	-0.428571	0.655172	0.661765	0.714286	-0.0588235	0.0588235	-0.692308	0	-0.913044	0.625	0.153846	0.411765	0.241379	0.04	0.534884	-0.533333		-0.2
																		0.979592	0.302326	0.916667	0.923077	0.75	0.0810811	-0.891068	0.341463	-0.941176	0.938461	0.318777	0.6	0.647059	-0.5	-0.428571	0.655172	0.661765	0.714286	-0.0588235	0.0588235	-0.692308	0	-0.913044	0.625	0.153846	0.411765	0.241379	0.04	0.534884	-0.533333		-0.2
																		0.979592	0.302326	0.916667	0.923077	0.75	0.0973451	-0.891068	0.341463	-0.941176	0.938461	0.318777	0.6	0.647059	-0.5	-0.428571	0.655172	0.661765	0.714286	-0.0588235	0.0588235	-0.692308	0	-0.913044	0.625	0.153846	0.411765	0.241379	0.04	0.534884	-0.533333		-0.2
																		0.979592	0.302326	0.916667	0.923077	0.75	0.113044	-0.891068	0.341463	-0.941176	0.938461	0.318777	0.6	0.647059	-0.5	-0.428571	0.655172	0.661765	0.714286	-0.0588235	0.0588235	-0.692308	0	-0.913044	0.625	0.153846	0.411765	0.241379	0.04	0.534884	-0.533333		-0.2
																		0.979592	0.302326	0.916667	0.923077	0.75	0.135593	-0.891068	0.341463	-0.941176	0.938461	0.318777	0.6	0.647059	-0.5	-0.428571	0.655172	0.661765	0.714286	-0.135135	0.0588235	-0.692308	0	-0.913044	0.625	0.153846	0.411765	0.241379	0.04	0.534884	-0.533333		-0.2
																		0.979592	0.302326	0.916667	0.923077	0.75	0.170732	-0.891068	0.341463	-0.941176	0.938461	0.318777	0.6	0.647059	-0.5	-0.428571	0.655172	0.661765	0.714286	-0.135135	0.0588235	-0.692308	0	-0.913044	0.625	0.153846	0.411765	0.241379	0.142857	0.534884	-0.533333		-0.2
																		0.979592	0.302326	0.916667	0.923077	0.75	0.203125	-0.891068	0.341463	-0.941176	0.938461	0.318777	0.6	0.647059	-0.5	-0.428571	0.655172	0.661765	0.714286	-0.135135	0.0588235	-0.692308	0	-0.913044	0.628319	0.153846	0.411765	0.241379	0.186441	0.534884	-0.533333		-0.2
																		0.979592	0.302326	0.916667	0.923077	0.75	0.227273	-0.891068	0.341463	-0.941176	0.938461	0.318777	0.6	0.647059	-0.5	-0.428571	0.655172	0.661765	0.714286	-0.135135	0.0588235	-0.692308	0	-0.913044	0.65	0.153846	0.411765	0.241379	0.213115	0.534884	-0.533333		-0.2
																		0.979592	0.302326	0.916667	0.923077	0.75	0.26087	-0.891068	0.341463	-0.941176	0.938461	0.318777	0.6	0.647059	-0.5	-0.428571	0.655172	0.661765	0.714286	-0.135135	0.0588235	-0.692308	0	-0.913044	0.676923	0.153846	0.411765	0.241379	0.25	0.534884	-0.533333		-0.2
																		0.979592	0.302326	0.916667	0.923077	0.75	0.286713	-0.891068	0.341463	-0.941176	0.938461	0.318777	0.6	0.647059	-0.5	-0.428571	0.655172	0.661765	0.714286	-0.135135	0.0588235	-0.692308	0	-0.913044	0.684211	0.153846	0.411765	0.241379	0.351351	0.534884	-0.533333		-0.2
																		0.979592	0.302326	0.916667	0.923077	0.75	0.324503	-0.891068	0.341463	-0.941176	0.938461	0.318777	0.6	0.647059	-0.5	-0.428571	0.655172	0.661765	0.714286	-0.135135	0.0588235	-0.692308	0	-0.913044	0.684211	0.153846	0.411765	0.241379	0.435294	0.534884	-0.533333		-0.2
																		0.979592	0.302326	0.916667	0.923077	0.75	0.35443	-0.891068	0.341463	-0.941176	0.938461	0.318777	0.6	0.647059	-0.5	-0.428571	0.655172	0.661765	0.714286	-0.135135	0.0588235	-0.692308	0	-0.913044	0.684211	0.153846	0.411765	0.241379	0.460674	0.534884	-0.533333		-0.2
																		0.979592	0.302326	0.916667	0.923077	0.75	0.381818	-0.891068	0.341463	-0.941176	0.938461	0.318777	0.6	0.647059	-0.5	-0.428571	0.655172	0.661765	0.714286	-0.135135	0.0588235	-0.692308	0	-0.913044	0.684211	0.153846	0.411765	0.241379	0.460674	0.534884	-0.533333		-0.2
																		0.979592	0.302326	0.916667	0.923077	0.75	0.381818	-0.891068	0.341463	-0.941176	0.938461	0.318777	0.6	0.647059	-0.5	-0.428571	0.655172	0.661765	0.714286	-0.135135	0.0588235	-0.692308	0	-0.913044	0.684211	0.153846	0.411765	0.241379	0.460674	0.534884	-0.533333		-0.2
																		0.979592	0.302326	0.916667	0.923077	0.75	0.385542	-0.891068	0.341463	-0.941176	0.938461	0.318777	0.6	0.647059	-0.5	-0.428571	0.655172	0.661765	0.714286	-0.135135	0.0588235	-0.692308	0	-0.913044	0.684211	0.153846	0.411765	0.241379	0.460674	0.534884	-0.533333		-0.2
																		0.979592	0.302326	0.916667	0.923077	0.75	0.385542	-0.891068	0.341463	-0.941176	0.938461	0.318777	0.6	0.647059	-0.5	-0.428571	0.655172	0.661765	0.714286	-0.135135	0.0588235	-0.692308	0	-0.913044	0.684211	0.153846	0.411765	0.241379	0.460674	0.534884	-0.533333		-0.2
																		0.979592	0.302326	0.916667	0.923077	0.75	0.385542	-0.891068	0.341463	-0.941176	0.938461	0.318777	0.6	0.647059	-0.5	-0.428571	0.655172	0.661765	0.714286	-0.135135	0.0588235	-0.692308	0	-0.913044	0.684211	0.153846	0.411765	0.241379	0.460674	0.534884	-0.533333		-0.2
																		0.979592	0.302326	0.916667	0.923077	0.75	0.385542	-0.891068	0.341463	-0.941176	0.938461	0.318777	0.6	0.647059	-0.5	-0.428571	0.655172	0.661765	0.714286	-0.135135	0.0588235	-0.692308	0	-0.913044	0.684211	0.153846	0.411765	0.241379	0.460674	0.534884	-0.533333		-0.2
																		0.979592	0.302326	0.916667	0.923077	0.75	0.385542	-0.891068	0.341463	-0.941176	0.938461	0.318777	0.6	0.647059	-0.5	-0.428571	0.655172	0.661765	0.714286	-0.135135	0.0588235	-0.692308	0	-0.913044	0.684211	0.153846	0.411765	0.241379	0.460674	0.534884	-0.533333		-0.2
																		0.979592	0.302326	0.916667	0.923077	0.75	0.385542	-0.891068	0.341463	-0.941176	0.938461	0.318777	0.6	0.647059	-0.5	-0.428571	0.655172	0.661765	0.714286	-0.135135	0.0588235	-0.692308	0	-0.913044	0.684211	0.153846	0.411765	0.241379	0.460674	0.534884	-0.533333		-0.2
																		0.979592	0.302326	0.916667	0.923077	0.75	0.385542	-0.891068	0.341463	-0.941176	0.938461	0.318777	0.6	0.647059	-0.5	-0.428571	0.655172	0.661765	0.714286	-0.135135	0.0588235	-0.692308	0	-0.913044	0.684211	0.153846	0.411765	0.241379	0.460674	0.534884	-0.533333		-0.2
																		0.979592	0.302326	0.916667	0.923077	0.75	0.385542	-0.891068	0.341463	-0.941176	0.938461	0.318777	0.6	0.647059	-0.5	-0.428571	0.655172	0.661765	0.714286	-0.135135	0.0588235	-0.692308	0	-0.913044	0.684211	0.153846	0.411765	0.241379	0.460674	0.534884	-0.533333		-0.2
																		0.979592	0.302326	0.916667	0.923077	0.75	0.385542	-0.891068	0.341463	-0.941176	0.938461	0.318777	0.6	0.647059	-0.5	-0.428571	0.655172	0.661765	0.714286	-0.135135	0.0588235	-0.692308	0	-0.913044	0.684211	0.153846	0.411765	0.241379	0.460674	0.534884	-0.533333		-0.2
																		0.979592	0.302326	0.916667	0.923077	0.75	0.385542	-0.891068	0.341463	-0.941176	0.938461	0.318777	0.6	0.647059	-0.5	-0.428571	0.655172	0.661765	0.714286	-0.135135	0.0588235	-0.692308	0	-0.913044	0.684211	0.153846	0.411765	0.241379	0.460674	0.534884	-0.533333		-0.2
																		0.979592	0.302326	0.916667	0.923077	0.75	0.385542	-0.891068	0.341463	-0.941176	0.938461	0.318777	0.6	0.647059	-0.5	-0.428571	0.655172	0.661765	0.714286	-0.135135	0.0588235	-0.692308	0	-0.913044	0.684211	0.153846	0.411765	0.241379	0.460674	0.534884	-0.533333		-0.2
																		0.979592	0.302326	0.916667	0.923077	0.75	0.385542	-0.891068	0.341463	-0.941176	0.938461	0.318777	0.6	0.647059	-0.5	-0.428571	0.655172	0.661765	0.714286	-0.135135	0.0588235	-0.692308	0	-0.913044	0.684211	0.153846	0.411765	0.241379	0.460674	0.534884	-0.533333		-0.2
																		0.979592	0.302326	0.916667	0.923077	0.75	0.385542	-0.891068	0.341463	-0.941176	0.938461	0.318777	0.6	0.647059	-0.5	-0.428571	0.655172	0.661765	0.714286	-0.135135	0.0588235	-0.692308	0	-0.913044	0.684211	0.153846	0.411765	0.241379	0.460674	0.534884	-0.533333		-0.2
																		0.979592	0.302326	0.916667	0.923077	0.75	0.385542	-0.891068	0.341463	-0.941176	0.938461	0.318777	0.6	0.647059	-0.5	-0.428571	0.666667	0.661765	0.714286	-0.135135	0.0697674	-0.692308	0	-0.913044	0.684211	0.153846	0.411765	0.241379	0.460674	0.534884	-0.533333		-0.2
																		0.979592	0.302326	0.916667	0.923077	0.75	0.385542	-0.891068	0.341463	-0.941176	0.938461	0.318777	0.6	0.647059	-0.5	-0.428571	0.722222	0.661765	0.714286	-0.135135	0.120879	-0.692308	0	-0.913044	0.647059	0.153846	0.411765	0.241379	0.460674	0.534884	-0.533333		-0.2
																		0.979592	0.302326	0.916667	0.923077	0.75	0.385542	-0.891068	0.341463	-0.941176	0.938461	0.318777	0.6	0.647059	-0.5	-0.428571	0.75	0.661765	0.714286	-0.135135	0.130435	-0.692308	0	-0.913044	0.647059	0.153846	0.411765	0.241379	0.460674	0.534884	-0.533333		-0.2
																		0.979592	0.302326	0.916667	0.923077	0.75	0.385542	-0.891068	0.341463	-0.941176	0.938461	0.318777	0.6	0.647059	-0.5	-0.5	0.761905	0.661765	0.714286	-0.135135	0.183673	-0.692308	0	-0.913044	0.647059	0.153846	0.411765	0.241379	0.460674	0.534884	-0.533333		-0.2
																		0.979592	0.302326	0.916667	0.923077	0.75	0.385542	-0.891068	0.325301	-0.941176	0.938461	0.318777	0.6	0.647059	-0.5	-0.5	0.761905	0.661765	0.714286	-0.135135	0.183673	-0.692308	0	-0.913044	0.647059	0.153846	0.411765	0.241379	0.460674	0.534884	-0.533333		-0.2
																		0.979592	0.302326	0.916667	0.923077	0.75	0.385542	-0.891068	0.325301	-0.941176	0.938461	0.318777	0.615385	0.647059	-0.5	-0.5	0.761905	0.661765	0.714286	-0.135135	0.191919	-0.692308	0	-0.913044	0.647059	0.153846	0.411765	0.241379	0.460674	0.534884	-0.533333		-0.2
																		0.979592	0.302326	0.916667	0.923077	0.75	0.385542	-0.891068	0.325301	-0.941176	0.938461	0.318777	0.615385	0.647059	-0.5	-0.5	0.761905	0.649635	0.714286	-0.135135	0.238095	-0.692308	0	-0.913044	0.647059	0.153846	0.411765	0.241379	0.460674	0.534884	-0.533333		-0.2
																		0.979592	0.302326	0.916667	0.923077	0.75	0.385542	-0.891068	0.325301	-0.941176	0.938461	0.318777	0.615385	0.647059	-0.5	-0.5	0.761905	0.637681	0.714286	-0.135135	0.252336	-0.692308	0	-0.913044	0.647059	0.153846	0.411765	0.241379	0.460674	0.534884	-0.533333		-0.2
																		0.979592	0.302326	0.916667	0.923077	0.75	0.385542	-0.891068	0.325301	-0.941176	0.938461	0.318777	0.615385	0.647059	-0.5	-0.5	0.761905	0.637681	0.714286	-0.135135	0.252336	-0.692308	0	-0.913044	0.647059	0.153846	0.411765	0.241379	0.460674	0.534884	-0.533333		-0.2
																		0.979592	0.302326	0.916667	0.923077	0.75	0.385542	-0.891068	0.325301	-0.941176	0.938461	0.318777	0.615385	0.647059	-0.5	-0.5	0.761905	0.637681	0.714286	-0.135135	0.252336	-0.692308	0	-0.913044	0.647059	0.153846	0.411765	0.241379	0.460674	0.534884	-0.533333		-0.2
																		0.979592	0.302326	0.916667	0.923077	0.75	0.385542	-0.891068	0.325301	-0.941176	0.938461	0.318777	0.615385	0.647059	-0.5	-0.5	0.761905	0.637681	0.714286	-0.135135	0.252336	-0.692308	0	-0.913044	0.647059	0.153846	0.411765	0.241379	0.460674	0.534884	-0.533333		-0.2
																		0.979592	0.302326	0.916667	0.923077	0.75	0.385542	-0.891068	0.325301	-0.941176	0.938461	0.318777	0.615385	0.647059	-0.5	-0.5	0.761905	0.637681	0.714286	-0.135135	0.252336	-0.692308	0	-0.913044	0.647059	0.153846	0.411765	0.241379	0.460674	0.534884	-0.533333		-0.2
																		0.979592	0.302326	0.916667	0.923077	0.752066	0.385542	-0.891068	0.325301	-0.941176	0.938461	0.318777	0.615385	0.647059	-0.5	-0.5	0.761905	0.637681	0.714286	-0.135135	0.252336	-0.692308	0	-0.913044	0.647059	0.153846	0.411765	0.241379	0.460674	0.534884	-0.533333		-0.2
																		0.979592	0.302326	0.916667	0.923077	0.752066	0.385542	-0.891068	0.325301	-0.941176	0.938461	0.318777	0.615385	0.647059	-0.5	-0.5	0.761905	0.637681	0.714286	-0.135135	0.252336	-0.692308	0	-0.913044	0.647059	0.153846	0.411765	0.241379	0.460674	0.534884	-0.533333		-0.2
																		0.979592	0.302326	0.916667	0.923077	0.752066	0.385542	-0.891068	0.325301	-0.941176	0.938461	0.318777	0.615385	0.647059	-0.5	-0.5	0.761905	0.637681	0.714286	-0.135135	0.252336	-0.692308	0	-0.913044	0.647059	0.153846	0.411765	0.241379	0.460674	0.534884	-0.533333		-0.2
																		0.979592	0.302326	0.916667	0.923077	0.754098	0.385542	-0.891068	0.325301	-0.941176	0.938461	0.318777	0.615385	0.647059	-0.5	-0.5	0.761905	0.637681	0.714286	-0.135135	0.252336	-0.692308	0	-0.913044	0.647059	0.153846	0.411765	0.241379	0.460674	0.534884	-0.533333		-0.2
																		0.979592	0.302326	0.916667	0.923077	0.754098	0.385542	-0.891068	0.325301	-0.941176	0.938461	0.318777	0.615385	0.647059	-0.5	-0.5	0.761905	0.637681	0.714286	-0.135135	0.252336	-0.692308	0	-0.913044	0.647059	0.153846	0.411765	0.241379	0.39785	0.534884	-0.533333		-0.2
																		0.979592	0.302326	0.916667	0.906158	0.754098	0.385542	-0.891068	0.325301	-0.941176	0.938461	0.318777	0.615385	0.647059	-0.5	-0.5	0.761905	0.637681	0.714286	-0.135135	0.252336	-0.692308	0	-0.913044	0.647059	0.153846	0.411765	0.241379	0.354167	0.534884	-0.533333		-0.2
																		0.979592	0.302326	0.916667	0.906158	0.754098	0.385542	-0.891068	0.325301	-0.941176	0.938461	0.318777	0.615385	0.647059	-0.5	-0.5	0.761905	0.637681	0.714286	-0.135135	0.252336	-0.692308	0	-0.913044	0.647059	0.153846	0.411765	0.241379	0.326531	0.534884	-0.533333		-0.2
																		0.979592	0.302326	0.916667	0.906158	0.754098	0.385542	-0.891068	0.325301	-0.941176	0.938461	0.318777	0.615385	0.647059	-0.5	-0.5	0.761905	0.625899	0.714286	-0.135135	0.252336	-0.692308	0	-0.913044	0.635037	0.153846	0.395349	0.241379	0.326531	0.534884	-0.533333		-0.2
																		0.979592	0.302326	0.916667	0.906158	0.754098	0.385542	-0.891068	0.325301	-0.941176	0.938461	0.318777	0.615385	0.647059	-0.5	-0.5	0.761905	0.625899	0.714286	-0.135135	0.252336	-0.692308	0	-0.913044	0.566434	0.153846	0.395349	0.241379	0.326531	0.534884	-0.533333		-0.2
																		0.979592	0.302326	0.916667	0.906158	0.754098	0.385542	-0.891068	0.325301	-0.941176	0.938461	0.318777	0.615385	0.647059	-0.5	-0.5	0.761905	0.625899	0.714286	-0.135135	0.252336	-0.692308	0	-0.913044	0.544828	0.153846	0.395349	0.16129	0.326531	0.534884	-0.533333		-0.2
																		0.979592	0.302326	0.92	0.906158	0.754098	0.385542	-0.891068	0.325301	-0.941176	0.938461	0.318777	0.615385	0.647059	-0.5	-0.5	0.761905	0.625899	0.714286	-0.135135	0.252336	-0.692308	0	-0.913044	0.544828	0.153846	0.395349	0.16129	0.326531	0.534884	-0.533333		-0.2
																		0.979592	0.302326	0.933333	0.906158	0.754098	0.385542	-0.891068	0.325301	-0.941176	0.938461	0.318777	0.615385	0.647059	-0.5	-0.5	0.761905	0.625899	0.714286	-0.135135	0.252336	-0.692308	0	-0.913044	0.544828	0.153846	0.395349	0.16129	0.326531	0.534884	-0.533333		-0.2
																		0.979592	0.302326	0.939394	0.906158	0.754098	0.385542	-0.891068	0.325301	-0.941176	0.938461	0.318777	0.615385	0.647059	-0.5	-0.5	0.761905	0.625899	0.714286	-0.135135	0.252336	-0.692308	0	-0.913044	0.544828	0.153846	0.395349	0.16129	0.326531	0.534884	-0.533333		-0.2
																		0.979592	0.302326	0.945946	0.906158	0.754098	0.389222	-0.891068	0.325301	-0.941176	0.938461	0.318777	0.62963	0.647059	-0.5	-0.5	0.761905	0.625899	0.714286	-0.135135	0.252336	-0.692308	0	-0.913044	0.544828	0.142857	0.395349	0.16129	0.326531	0.534884	-0.533333		-0.2
																		0.979592	0.302326	0.95	0.906158	0.754098	0.389222	-0.891068	0.325301	-0.941176	0.938461	0.318777	0.62963	0.647059	-0.5	-0.5	0.761905	0.625899	0.714286	-0.135135	0.252336	-0.692308	0	-0.913044	0.544828	0.142857	0.395349	0.16129	0.326531	0.534884	-0.533333		-0.2
																		0.979592	0.302326	0.954545	0.906158	0.754098	0.389222	-0.891068	0.325301	-0.941176	0.938461	0.318777	0.62963	0.647059	-0.5	-0.5	0.761905	0.625899	0.714286	-0.135135	0.252336	-0.692308	0	-0.913044	0.544828	0.142857	0.395349	0.16129	0.326531	0.534884	-0.533333		-0.2
																		0.979592	0.302326	0.96	0.906158	0.754098	0.389222	-0.891068	0.325301	-0.941176	0.938461	0.318777	0.62963	0.647059	-0.5	-0.5	0.761905	0.625899	0.714286	-0.135135	0.252336	-0.692308	0	-0.913044	0.544828	0.142857	0.395349	0.16129	0.326531	0.534884	-0.533333		-0.2
																		0.979592	0.302326	0.961538	0.906158	0.754098	0.389222	-0.891068	0.325301	-0.941176	0.938461	0.318777	0.62963	0.647059	-0.5	-0.5	0.761905	0.625899	0.714286	-0.135135	0.252336	-0.692308	0	-0.913044	0.544828	0.142857	0.395349	0.16129	0.326531	0.534884	-0.533333		-0.2
																		0.979592	0.302326	0.961538	0.906158	0.754098	0.389222	-0.891068	0.325301	-0.941176	0.938461	0.318777	0.62963	0.647059	-0.5	-0.5	0.761905	0.625899	0.714286	-0.135135	0.252336	-0.692308	0	-0.913044	0.544828	0.142857	0.395349	0.16129	0.326531	0.534884	-0.533333		-0.2
																		0.979592	0.302326	0.962264	0.906158	0.754098	0.389222	-0.891068	0.325301	-0.941176	0.938461	0.318777	0.62963	0.647059	-0.5	-0.5	0.761905	0.625899	0.714286	-0.135135	0.252336	-0.692308	0	-0.913044	0.544828	0.142857	0.395349	0.16129	0.326531	0.534884	-0.533333		-0.2
																		0.979592	0.302326	0.962264	0.906158	0.754098	0.389222	-0.891068	0.325301	-0.941176	0.938461	0.318777	0.62963	0.647059	-0.5	-0.5	0.761905	0.625899	0.714286	-0.135135	0.252336	-0.692308	0	-0.913044	0.544828	0.142857	0.395349	0.16129	0.326531	0.534884	-0.533333		-0.2
																		0.979592	0.302326	0.962264	0.906158	0.754098	0.389222	-0.891068	0.325301	-0.941176	0.938461	0.318777	0.62963	0.647059	-0.5	-0.5	0.761905	0.625899	0.714286	-0.135135	0.252336	-0.692308	0	-0.913044	0.544828	0.142857	0.395349	0.16129	0.326531	0.534884	-0.533333		-0.2
																		0.979592	0.302326	0.962264	0.906158	0.754098	0.389222	-0.891068	0.325301	-0.941176	0.938461	0.318777	0.62963	0.647059	-0.5	-0.5	0.761905	0.625899	0.714286	-0.135135	0.252336	-0.692308	0	-0.913044	0.544828	0.142857	0.395349	0.16129	0.326531	0.534884	-0.533333		-0.2
																		0.979592	0.302326	0.962264	0.906158	0.754098	0.389222	-0.891068	0.325301	-0.941176	0.938461	0.318777	0.62963	0.647059	-0.5	-0.5	0.761905	0.625899	0.714286	-0.135135	0.252336	-0.692308	0	-0.913044	0.544828	0.142857	0.395349	0.16129	0.326531	0.534884	-0.533333		-0.2
																		0.979592	0.302326	0.962264	0.906158	0.754098	0.389222	-0.891068	0.325301	-0.941176	0.938461	0.318777	0.62963	0.647059	-0.5	-0.5	0.761905	0.625899	0.714286	-0.135135	0.252336	-0.692308	0	-0.913044	0.544828	0.142857	0.395349	0.16129	0.326531	0.534884	-0.533333		-0.2
																		0.979592	0.302326	0.962264	0.906158	0.754098	0.389222	-0.891068	0.325301	-0.941176	0.938461	0.318777	0.62963	0.647059	-0.5	-0.5	0.761905	0.625899	0.714286	-0.135135	0.252336	-0.692308	0	-0.913044	0.544828	0.142857	0.395349	0.16129	0.326531	0.534884	-0.533333		-0.2
																		0.979592	0.302326	0.962264	0.906158	0.754098	0.389222	-0.891068	0.325301	-0.941176	0.938461	0.318777	0.62963	0.647059	-0.5	-0.5	0.761905	0.625899	0.714286	-0.135135	0.252336	-0.692308	0	-0.913044	0.544828	0.142857	0.395349	0.16129	0.326531	0.534884	-0.533333		-0.2
																		0.979592	0.302326	0.962264	0.906158	0.754098	0.389222	-0.891068	0.325301	-0.941176	0.938461	0.318777	0.571429	0.647059	-0.5	-0.5	0.761905	0.625899	0.714286	-0.135135	0.252336	-0.692308	0	-0.913044	0.544828	0.142857	0.395349	0.16129	0.326531	0.534884	-0.533333		-0.2
																		0.979592	0.302326	0.962264	0.906158	0.754098	0.389222	-0.891068	0.325301	-0.941176	0.938461	0.318777	0.571429	0.647059	-0.5	-0.5	0.761905	0.625899	0.714286	-0.135135	0.252336	-0.692308	0	-0.913044	0.544828	0.142857	0.395349	0.16129	0.326531	0.534884	-0.533333		-0.2
																		0.979592	0.302326	0.962264	0.906158	0.754098	0.389222	-0.891068	0.325301	-0.941176	0.938461	0.318777	0.571429	0.647059	-0.5	-0.5	0.761905	0.625899	0.714286	-0.135135	0.252336	-0.692308	0	-0.913044	0.544828	0.142857	0.395349	0.16129	0.326531	0.534884	-0.533333		-0.2
																		0.979592	0.302326	0.962264	0.906158	0.754098	0.389222	-0.891068	0.325301	-0.941176	0.938461	0.318777	0.571429	0.647059	-0.5	-0.5	0.761905	0.625899	0.714286	-0.135135	0.252336	-0.692308	0	-0.913044	0.544828	0.142857	0.395349	0.16129	0.326531	0.534884	-0.533333		-0.2
																		0.979592	0.302326	0.962264	0.906158	0.754098	0.389222	-0.891068	0.325301	-0.941176	0.938461	0.318777	0.571429	0.647059	-0.5	-0.5	0.761905	0.625899	0.714286	-0.135135	0.240741	-0.692308	0	-0.913044	0.544828	0.142857	0.395349	0.16129	0.326531	0.534884	-0.533333		-0.2
																		0.979592	0.302326	0.962264	0.906158	0.754098	0.389222	-0.891068	0.325301	-0.941176	0.938461	0.318777	0.571429	0.647059	-0.5	-0.5	0.761905	0.625899	0.714286	-0.135135	0.240741	-0.692308	0	-0.913044	0.544828	0.142857	0.395349	0.16129	0.326531	0.534884	-0.533333		-0.2
																		0.979592	0.302326	0.962264	0.906158	0.754098	0.389222	-0.891068	0.325301	-0.941176	0.938461	0.318777	0.571429	0.647059	-0.5	-0.5	0.761905	0.625899	0.714286	-0.135135	0.240741	-0.692308	0	-0.913044	0.544828	0.142857	0.395349	0.16129	0.326531	0.534884	-0.533333		-0.2
																		0.979592	0.302326	0.962264	0.906158	0.754098	0.389222	-0.891068	0.325301	-0.941176	0.938461	0.318777	0.571429	0.647059	-0.5	-0.5	0.761905	0.625899	0.714286	-0.135135	0.240741	-0.692308	0	-0.913044	0.544828	0.142857	0.395349	0.16129	0.326531	0.534884	-0.533333		-0.2
																		0.979592	0.302326	0.962264	0.906158	0.754098	0.389222	-0.891068	0.325301	-0.941176	0.938461	0.296137	0.571429	0.647059	-0.5	-0.5	0.761905	0.625899	0.714286	-0.135135	0.240741	-0.692308	0	-0.913044	0.544828	0.142857	0.395349	0.16129	0.326531	0.534884	-0.533333		-0.2
																		0.979592	0.302326	0.962264	0.906158	0.754098	0.389222	-0.891068	0.325301	-0.941176	0.938461	0.296137	0.571429	0.647059	-0.5	-0.5	0.761905	0.625899	0.714286	-0.135135	0.240741	-0.692308	0	-0.913044	0.544828	0.142857	0.395349	0.125	0.326531	0.534884	-0.533333		-0.2
																		0.979592	0.302326	0.962264	0.906158	0.754098	0.389222	-0.891068	0.325301	-0.941176	0.938461	0.296137	0.571429	0.647059	-0.5	-0.5	0.761905	0.625899	0.714286	-0.135135	0.240741	-0.692308	0	-0.913044	0.544828	0.142857	0.395349	0.125	0.326531	0.534884	-0.533333		-0.2
																		0.979592	0.302326	0.962264	0.906158	0.754098	0.389222	-0.891068	0.325301	-0.941176	0.938461	0.296137	0.571429	0.647059	-0.5	-0.5	0.761905	0.625899	0.714286	-0.135135	0.240741	-0.692308	0	-0.913044	0.544828	0.142857	0.395349	0.125	0.326531	0.534884	-0.533333		-0.2
																		0.979592	0.302326	0.962264	0.906158	0.754098	0.389222	-0.891068	0.325301	-0.941176	0.938461	0.296137	0.571429	0.647059	-0.5	-0.571429	0.761905	0.625899	0.714286	-0.135135	0.240741	-0.692308	0	-0.913044	0.544828	0.142857	0.395349	0.125	0.326531	0.534884	-0.533333		-0.2
																		0.979592	0.302326	0.962264	0.906158	0.754098	0.389222	-0.891068	0.325301	-0.941176	0.938461	0.296137	0.571429	0.647059	-0.5	-0.571429	0.761905	0.625899	0.714286	-0.135135	0.240741	-0.692308	0	-0.913044	0.544828	0.142857	0.395349	0.125	0.326531	0.534884	-0.533333		-0.2
																		0.979592	0.302326	0.962264	0.906158	0.756098	0.389222	-0.891068	0.325301	-0.941176	0.938461	0.296137	0.571429	0.647059	-0.5	-0.571429	0.761905	0.625899	0.714286	-0.135135	0.240741	-0.692308	0	-0.913044	0.544828	0.142857	0.395349	0.125	0.326531	0.534884	-0.533333		-0.2
																		0.979592	0.302326	0.962264	0.906158	0.756098	0.389222	-0.891068	0.325301	-0.941176	0.938461	0.296137	0.571429	0.647059	-0.5	-0.571429	0.761905	0.625899	0.714286	-0.135135	0.229358	-0.692308	0	-0.913044	0.544828	0.142857	0.395349	0.125	0.326531	0.534884	-0.533333		-0.2
																		0.979592	0.302326	0.962264	0.906158	0.758065	0.389222	-0.891068	0.325301	-0.941176	0.938461	0.296137	0.571429	0.647059	-0.5	-0.571429	0.761905	0.625899	0.714286	-0.135135	0.229358	-0.692308	0	-0.913044	0.544828	0.142857	0.395349	0.125	0.326531	0.534884	-0.533333		-0.2
																		0.979592	0.302326	0.962264	0.906158	0.758065	0.389222	-0.891068	0.325301	-0.941176	0.938461	0.296137	0.571429	0.647059	-0.5	-0.571429	0.761905	0.614286	0.714286	-0.135135	0.229358	-0.692308	0	-0.913044	0.544828	0.142857	0.395349	0.125	0.326531	0.534884	-0.533333		-0.2
																		0.979592	0.302326	0.962264	0.906158	0.758065	0.389222	-0.891068	0.325301	-0.941176	0.938461	0.296137	0.571429	0.647059	-0.5	-0.571429	0.761905	0.614286	0.714286	-0.135135	0.229358	-0.692308	0	-0.913044	0.544828	0.142857	0.395349	0.125	0.326531	0.534884	-0.533333		-0.2
																		0.979592	0.302326	0.962264	0.906158	0.758065	0.389222	-0.891068	0.325301	-0.941176	0.938461	0.296137	0.571429	0.647059	-0.5	-0.571429	0.761905	0.614286	0.714286	-0.135135	0.229358	-0.692308	0	-0.913044	0.544828	0.142857	0.395349	0.125	0.326531	0.534884	-0.533333		-0.2
																		0.979592	0.302326	0.962264	0.906158	0.758065	0.389222	-0.891068	0.325301	-0.941176	0.938461	0.296137	0.571429	0.647059	-0.5	-0.571429	0.761905	0.614286	0.714286	-0.135135	0.229358	-0.692308	0	-0.913044	0.52381	0.142857	0.395349	0.125	0.326531	0.534884	-0.533333		-0.2
																		0.979592	0.302326	0.962264	0.906158	0.758065	0.389222	-0.891068	0.325301	-0.941176	0.938461	0.296137	0.571429	0.647059	-0.5	-0.571429	0.791667	0.614286	0.714286	-0.135135	0.288136	-0.692308	0	-0.913044	0.52381	0.142857	0.395349	0.125	0.326531	0.534884	-0.533333		-0.2
																		0.979592	0.302326	0.962264	0.906158	0.758065	0.389222	-0.891068	0.325301	-0.941176	0.938461	0.296137	0.571429	0.647059	-0.5	-0.571429	0.807692	0.614286	0.714286	-0.135135	0.3	-0.692308	0	-0.913044	0.52381	0.142857	0.395349	0.125	0.326531	0.534884	-0.533333		-0.2
																		0.979592	0.302326	0.962264	0.906158	0.758065	0.389222	-0.891068	0.325301	-0.941176	0.938461	0.296137	0.571429	0.647059	-0.5	-0.571429	0.807692	0.614286	0.714286	-0.135135	0.3	-0.692308	0	-0.913044	0.52381	0.142857	0.395349	0.125	0.326531	0.534884	-0.533333		-0.2
																		0.979592	0.302326	0.962264	0.906158	0.758065	0.389222	-0.891068	0.325301	-0.941176	0.938461	0.296137	0.571429	0.647059	-0.5	-0.571429	0.807692	0.614286	0.714286	-0.135135	0.3	-0.692308	0	-0.913044	0.52381	0.142857	0.395349	0.125	0.326531	0.534884	-0.533333		-0.2
																		0.979592	0.302326	0.962264	0.906158	0.758065	0.389222	-0.891068	0.325301	-0.941176	0.938461	0.296137	0.571429	0.647059	-0.5	-0.571429	0.807692	0.614286	0.714286	-0.135135	0.3	-0.692308	0	-0.913044	0.52381	0.142857	0.395349	0.125	0.326531	0.534884	-0.533333		-0.2
																		0.979592	0.302326	0.962264	0.906158	0.758065	0.389222	-0.891068	0.325301	-0.941176	0.938461	0.296137	0.571429	0.647059	-0.5	-0.571429	0.807692	0.614286	0.714286	-0.135135	0.3	-0.692308	0	-0.913044	0.52381	0.142857	0.446808	0.125	0.326531	0.534884	-0.533333		-0.2
																		0.979592	0.302326	0.962264	0.906158	0.758065	0.389222	-0.891068	0.325301	-0.941176	0.938461	0.296137	0.571429	0.647059	-0.5	-0.571429	0.807692	0.614286	0.714286	-0.135135	0.3	-0.692308	0	-0.913044	0.52381	0.142857	0.458333	0.125	0.326531	0.534884	-0.533333		-0.2
																		0.979592	0.302326	0.962264	0.906158	0.758065	0.389222	-0.891068	0.325301	-0.941176	0.938461	0.296137	0.571429	0.647059	-0.5	-0.571429	0.807692	0.614286	0.714286	-0.135135	0.3	-0.692308	0	-0.913044	0.52381	0.142857	0.474747	0.125	0.326531	0.534884	-0.533333		-0.2
																		0.979592	0.302326	0.962264	0.906158	0.758065	0.389222	-0.891068	0.325301	-0.941176	0.938461	0.296137	0.571429	0.647059	-0.5	-0.571429	0.807692	0.614286	0.714286	-0.135135	0.3	-0.692308	0	-0.913044	0.52381	0.142857	0.509434	0.125	0.326531	0.534884	-0.533333		-0.2
																		0.979592	0.302326	0.962264	0.906158	0.758065	0.389222	-0.891068	0.325301	-0.941176	0.938461	0.296137	0.571429	0.647059	-0.5	-0.571429	0.807692	0.614286	0.714286	-0.135135	0.3	-0.692308	0	-0.913044	0.52381	0.132076	0.531532	0.125	0.326531	0.534884	-0.533333		-0.2
																		0.979592	0.302326	0.962264	0.906158	0.758065	0.389222	-0.891068	0.325301	-0.941176	0.938461	0.296137	0.571429	0.647059	-0.5	-0.571429	0.807692	0.614286	0.714286	-0.135135	0.3	-0.692308	0	-0.913044	0.52381	0.121495	0.563025	0.125	0.326531	0.534884	-0.533333		-0.2
																		0.979592	0.302326	0.962264	0.906158	0.758065	0.389222	-0.891068	0.325301	-0.941176	0.938461	0.296137	0.571429	0.647059	-0.5	-0.571429	0.807692	0.614286	0.714286	-0.135135	0.3	-0.692308	0	-0.913044	0.52381	0.121495	0.566667	0.125	0.326531	0.534884	-0.533333		-0.2
																		0.979592	0.302326	0.962264	0.906158	0.758065	0.389222	-0.891068	0.325301	-0.941176	0.938461	0.296137	0.571429	0.647059	-0.5	-0.571429	0.807692	0.614286	0.714286	-0.135135	0.3	-0.692308	0	-0.913044	0.52381	0.121495	0.566667	0.125	0.326531	0.534884	-0.533333		-0.2
																		0.979592	0.302326	0.962264	0.900585	0.758065	0.389222	-0.891068	0.325301	-0.941176	0.938461	0.296137	0.571429	0.647059	-0.5	-0.571429	0.807692	0.614286	0.714286	-0.135135	0.3	-0.692308	0	-0.913044	0.52381	0.121495	0.566667	0.125	0.326531	0.534884	-0.533333		-0.2
																		0.979592	0.302326	0.962264	0.878613	0.758065	0.389222	-0.891068	0.325301	-0.941176	0.938461	0.296137	0.571429	0.647059	-0.5	-0.571429	0.807692	0.614286	0.714286	-0.135135	0.3	-0.692308	0	-0.913044	0.52381	0.121495	0.566667	0.125	0.326531	0.534884	-0.533333		-0.2
																		0.979592	0.302326	0.962264	0.878613	0.758065	0.389222	-0.891068	0.325301	-0.941176	0.938461	0.296137	0.571429	0.647059	-0.5	-0.571429	0.807692	0.614286	0.714286	-0.135135	0.3	-0.7	0	-0.913044	0.52381	0.100917	0.566667	0.125	0.326531	0.534884	-0.533333		-0.2
																		0.979592	0.302326	0.962264	0.878613	0.758065	0.389222	-0.891068	0.325301	-0.941176	0.938461	0.296137	0.571429	0.647059	-0.5	-0.571429	0.807692	0.614286	0.714286	-0.135135	0.3	-0.707317	0	-0.913044	0.52381	0.100917	0.566667	0.125	0.326531	0.534884	-0.533333		-0.2
																		0.979592	0.302326	0.962264	0.878613	0.758065	0.389222	-0.891068	0.325301	-0.941176	0.938461	0.296137	0.571429	0.647059	-0.5	-0.571429	0.807692	0.614286	0.714286	-0.135135	0.3	-0.707317	0	-0.913044	0.52381	0.100917	0.566667	0.125	0.326531	0.534884	-0.533333		-0.2
																		0.979592	0.302326	0.962264	0.878613	0.758065	0.389222	-0.891068	0.325301	-0.941176	0.938461	0.296137	0.571429	0.647059	-0.5	-0.571429	0.807692	0.614286	0.714286	-0.135135	0.3	-0.707317	0	-0.913044	0.52381	0.100917	0.566667	0.125	0.326531	0.534884	-0.533333		-0.2
																		0.979592	0.302326	0.962264	0.878613	0.758065	0.389222	-0.891068	0.325301	-0.941176	0.938461	0.296137	0.571429	0.647059	-0.5	-0.571429	0.807692	0.614286	0.714286	-0.135135	0.311475	-0.707317	0	-0.913044	0.52381	0.100917	0.566667	0.125	0.326531	0.534884	-0.533333		-0.2
																		0.979592	0.302326	0.962264	0.878613	0.758065	0.389222	-0.891068	0.325301	-0.941176	0.938461	0.296137	0.571429	0.647059	-0.5	-0.571429	0.807692	0.614286	0.714286	-0.135135	0.311475	-0.707317	0	-0.913044	0.52381	0.100917	0.566667	0.125	0.326531	0.534884	-0.533333		-0.2
																		0.979592	0.302326	0.962264	0.878613	0.758065	0.389222	-0.891068	0.325301	-0.941176	0.938461	0.296137	0.571429	0.647059	-0.5	-0.571429	0.807692	0.614286	0.714286	-0.135135	0.311475	-0.707317	0	-0.913044	0.52381	0.100917	0.566667	0.125	0.326531	0.534884	-0.533333		-0.2
																		0.979592	0.302326	0.962264	0.878613	0.758065	0.389222	-0.891068	0.325301	-0.941176	0.938461	0.296137	0.571429	0.647059	-0.5	-0.571429	0.807692	0.614286	0.714286	-0.135135	0.311475	-0.707317	0	-0.913044	0.52381	0.100917	0.566667	0.125	0.326531	0.534884	-0.533333		-0.2
																		0.979592	0.302326	0.962264	0.878613	0.758065	0.389222	-0.891068	0.325301	-0.948718	0.938461	0.296137	0.571429	0.647059	-0.5	-0.571429	0.807692	0.614286	0.714286	-0.135135	0.311475	-0.707317	0	-0.913044	0.52381	0.100917	0.566667	0.125	0.326531	0.534884	-0.533333		-0.2
																		0.979592	0.302326	0.962264	0.878613	0.758065	0.389222	-0.891068	0.325301	-0.948718	0.938461	0.296137	0.571429	0.647059	-0.5	-0.571429	0.807692	0.614286	0.714286	-0.135135	0.311475	-0.707317	0	-0.913044	0.52381	0.100917	0.566667	0.125	0.326531	0.534884	-0.533333		-0.2
																		0.979592	0.302326	0.962264	0.878613	0.758065	0.389222	-0.891068	0.325301	-0.948718	0.938461	0.296137	0.571429	0.647059	-0.5	-0.571429	0.807692	0.614286	0.714286	-0.135135	0.311475	-0.707317	0	-0.913044	0.52381	0.100917	0.566667	0.125	0.326531	0.534884	-0.533333		-0.2
																		0.979592	0.302326	0.962264	0.878613	0.758065	0.389222	-0.891068	0.325301	-0.948718	0.938461	0.296137	0.571429	0.647059	-0.5	-0.571429	0.807692	0.614286	0.714286	-0.135135	0.311475	-0.707317	0	-0.913044	0.52381	0.100917	0.566667	0.125	0.326531	0.534884	-0.533333		-0.2
																		0.979592	0.302326	0.962264	0.878613	0.758065	0.389222	-0.891068	0.325301	-0.948718	0.938461	0.296137	0.571429	0.647059	-0.5	-0.571429	0.807692	0.614286	0.714286	-0.135135	0.311475	-0.707317	0	-0.913044	0.52381	0.100917	0.566667	0.125	0.326531	0.534884	-0.533333		-0.2
																		0.979592	0.302326	0.962264	0.878613	0.758065	0.389222	-0.891068	0.325301	-0.948718	0.938461	0.296137	0.571429	0.647059	-0.5	-0.571429	0.807692	0.614286	0.714286	-0.135135	0.311475	-0.707317	0	-0.913044	0.52381	0.100917	0.566667	0.125	0.326531	0.534884	-0.533333		-0.2
																		0.979592	0.302326	0.962264	0.878613	0.758065	0.389222	-0.891068	0.325301	-0.948718	0.938461	0.296137	0.571429	0.647059	-0.5	-0.571429	0.807692	0.614286	0.714286	-0.135135	0.311475	-0.707317	0	-0.913044	0.52381	0.100917	0.566667	0.125	0.326531	0.534884	-0.533333		-0.2
																		0.979592	0.302326	0.962264	0.878613	0.758065	0.389222	-0.891068	0.325301	-0.948718	0.938461	0.296137	0.571429	0.647059	-0.5	-0.571429	0.807692	0.614286	0.714286	-0.135135	0.311475	-0.707317	0	-0.913044	0.52381	0.100917	0.566667	0.125	0.326531	0.534884	-0.533333		-0.2
																		0.979592	0.333333	0.962264	0.878613	0.758065	0.389222	-0.891068	0.325301	-0.948718	0.938461	0.296137	0.571429	0.647059	-0.5	-0.571429	0.807692	0.614286	0.714286	-0.135135	0.311475	-0.707317	0	-0.913044	0.52381	0.100917	0.566667	0.125	0.326531	0.534884	-0.533333		-0.2
																		0.979592	0.387755	0.962264	0.878613	0.758065	0.389222	-0.891068	0.325301	-0.948718	0.938461	0.296137	0.571429	0.647059	-0.5	-0.571429	0.807692	0.614286	0.714286	-0.135135	0.311475	-0.707317	0	-0.913044	0.52381	0.100917	0.566667	0.125	0.326531	0.534884	-0.533333		-0.2
																		0.979592	0.387755	0.962264	0.878613	0.758065	0.389222	-0.891068	0.325301	-0.948718	0.938461	0.296137	0.571429	0.647059	-0.5	-0.571429	0.807692	0.614286	0.714286	-0.135135	0.311475	-0.707317	0	-0.913044	0.52381	0.100917	0.566667	0.125	0.326531	0.534884	-0.533333		-0.2
																		0.979592	0.4	0.962264	0.878613	0.758065	0.389222	-0.891068	0.325301	-0.948718	0.938461	0.296137	0.571429	0.647059	-0.5	-0.571429	0.807692	0.614286	0.714286	-0.135135	0.311475	-0.707317	0	-0.913044	0.52381	0.100917	0.566667	0.125	0.326531	0.534884	-0.533333		-0.2
																		0.979592	0.423077	0.962264	0.878613	0.758065	0.389222	-0.891068	0.325301	-0.948718	0.938461	0.296137	0.571429	0.647059	-0.5	-0.571429	0.807692	0.614286	0.714286	-0.135135	0.311475	-0.707317	0	-0.913044	0.52381	0.100917	0.566667	0.125	0.326531	0.534884	-0.533333		-0.2
																		0.979592	0.433962	0.962264	0.878613	0.758065	0.389222	-0.891068	0.325301	-0.948718	0.938461	0.296137	0.571429	0.647059	-0.5	-0.571429	0.807692	0.614286	0.714286	-0.135135	0.311475	-0.707317	0	-0.913044	0.52381	0.100917	0.566667	0.125	0.326531	0.534884	-0.533333		-0.2
																		0.979592	0.454545	0.962264	0.878613	0.758065	0.389222	-0.891068	0.325301	-0.948718	0.938461	0.296137	0.571429	0.647059	-0.555556	-0.571429	0.807692	0.614286	0.714286	-0.135135	0.311475	-0.707317	0	-0.913044	0.52381	0.100917	0.566667	0.125	0.326531	0.534884	-0.533333		-0.2
																		0.979592	0.473684	0.962264	0.878613	0.758065	0.389222	-0.891068	0.325301	-0.948718	0.938461	0.296137	0.571429	0.647059	-0.644444	-0.571429	0.807692	0.614286	0.714286	-0.135135	0.311475	-0.707317	0	-0.913044	0.52381	0.100917	0.566667	0.125	0.326531	0.534884	-0.533333		-0.2
																		0.979592	0.491525	0.962264	0.878613	0.758065	0.389222	-0.891068	0.325301	-0.948718	0.938461	0.296137	0.571429	0.647059	-0.644444	-0.571429	0.807692	0.614286	0.714286	-0.135135	0.311475	-0.707317	0	-0.913044	0.52381	0.100917	0.566667	0.125	0.326531	0.534884	-0.533333		-0.2
																		0.979592	0.508197	0.962264	0.878613	0.76	0.389222	-0.891068	0.325301	-0.948718	0.938461	0.296137	0.571429	0.647059	-0.644444	-0.571429	0.807692	0.614286	0.714286	-0.135135	0.311475	-0.707317	0	-0.913044	0.52381	0.100917	0.566667	0.125	0.326531	0.534884	-0.533333		-0.2
																		0.979592	0.516129	0.962264	0.878613	0.76	0.389222	-0.891068	0.325301	-0.948718	0.938461	0.296137	0.571429	0.647059	-0.644444	-0.571429	0.807692	0.614286	0.714286	-0.135135	0.311475	-0.707317	0	-0.913044	0.52381	0.100917	0.566667	0.125	0.326531	0.534884	-0.533333		-0.2
																		0.979592	0.516129	0.962264	0.878613	0.76	0.389222	-0.891068	0.325301	-0.948718	0.938461	0.296137	0.571429	0.647059	-0.644444	-0.571429	0.807692	0.614286	0.714286	-0.135135	0.311475	-0.707317	0	-0.913044	0.52381	0.100917	0.566667	0.125	0.326531	0.534884	-0.533333		-0.2
																		0.979592	0.516129	0.962264	0.878613	0.76	0.389222	-0.891068	0.325301	-0.948718	0.938461	0.296137	0.571429	0.647059	-0.644444	-0.571429	0.807692	0.614286	0.714286	-0.135135	0.311475	-0.707317	0	-0.913044	0.52381	0.100917	0.566667	0.125	0.326531	0.534884	-0.533333		-0.2
																		0.979592	0.516129	0.962264	0.878613	0.76	0.389222	-0.891068	0.325301	-0.948718	0.938461	0.296137	0.571429	0.647059	-0.644444	-0.571429	0.807692	0.614286	0.714286	-0.135135	0.311475	-0.707317	0	-0.913044	0.52381	0.100917	0.566667	0.125	0.326531	0.534884	-0.533333		-0.2
																		0.979592	0.52381	0.962264	0.878613	0.76	0.389222	-0.891068	0.325301	-0.948718	0.938461	0.296137	0.571429	0.647059	-0.644444	-0.571429	0.807692	0.614286	0.714286	-0.135135	0.311475	-0.707317	0	-0.913044	0.52381	0.100917	0.566667	0.125	0.326531	0.534884	-0.533333		-0.2
																		0.979592	0.53125	0.962264	0.878613	0.76	0.389222	-0.891068	0.325301	-0.948718	0.938461	0.296137	0.571429	0.647059	-0.644444	-0.571429	0.807692	0.614286	0.714286	-0.135135	0.311475	-0.707317	0	-0.913044	0.52381	0.100917	0.566667	0.125	0.326531	0.534884	-0.533333		-0.2
																		0.979592	0.545455	0.962264	0.878613	0.76	0.389222	-0.891068	0.325301	-0.948718	0.938461	0.296137	0.571429	0.647059	-0.644444	-0.571429	0.807692	0.614286	0.714286	-0.135135	0.311475	-0.707317	0	-0.913044	0.52381	0.100917	0.566667	0.125	0.326531	0.534884	-0.533333		-0.2
																		0.979592	0.552239	0.962264	0.878613	0.76	0.389222	-0.891068	0.325301	-0.948718	0.938461	0.296137	0.571429	0.647059	-0.644444	-0.571429	0.807692	0.614286	0.714286	-0.135135	0.311475	-0.707317	0	-0.913044	0.52381	0.100917	0.566667	0.125	0.326531	0.534884	-0.533333		-0.2
																		0.979592	0.558824	0.962264	0.878613	0.76	0.389222	-0.891068	0.325301	-0.948718	0.938461	0.285106	0.571429	0.647059	-0.644444	-0.571429	0.807692	0.614286	0.714286	-0.135135	0.311475	-0.707317	0	-0.913044	0.52381	0.100917	0.566667	0.125	0.326531	0.534884	-0.533333		-0.2
																		0.979592	0.558824	0.962264	0.878613	0.76	0.389222	-0.891068	0.325301	-0.948718	0.938461	0.285106	0.571429	0.647059	-0.644444	-0.571429	0.807692	0.614286	0.714286	-0.135135	0.311475	-0.707317	0	-0.913044	0.52381	0.100917	0.566667	0.125	0.326531	0.534884	-0.533333		-0.2
																		0.979592	0.565217	0.962264	0.878613	0.76	0.389222	-0.891068	0.325301	-0.948718	0.938461	0.288136	0.571429	0.647059	-0.644444	-0.571429	0.807692	0.614286	0.714286	-0.135135	0.311475	-0.707317	0	-0.913044	0.52381	0.100917	0.566667	0.125	0.326531	0.534884	-0.533333		-0.2
																		0.979592	0.577465	0.962264	0.878613	0.76	0.389222	-0.891068	0.325301	-0.948718	0.938461	0.288136	0.571429	0.647059	-0.644444	-0.571429	0.807692	0.614286	0.714286	-0.135135	0.311475	-0.707317	0	-0.913044	0.52381	0.100917	0.566667	0.125	0.326531	0.534884	-0.533333		-0.2
																		0.979592	0.583333	0.962264	0.878613	0.76	0.389222	-0.891068	0.325301	-0.948718	0.938461	0.288136	0.571429	0.647059	-0.644444	-0.571429	0.807692	0.614286	0.714286	-0.135135	0.311475	-0.707317	0	-0.913044	0.52381	0.0909091	0.566667	0.125	0.326531	0.534884	-0.533333		-0.2
																		0.979592	0.589041	0.962264	0.878613	0.76	0.392857	-0.891068	0.325301	-0.948718	0.938461	0.288136	0.571429	0.647059	-0.644444	-0.571429	0.807692	0.614286	0.714286	-0.135135	0.311475	-0.707317	0	-0.913044	0.52381	0.0909091	0.566667	0.125	0.326531	0.534884	-0.533333		-0.2
																		0.979592	0.589041	0.962264	0.878613	0.76	0.392857	-0.891068	0.325301	-0.948718	0.938461	0.288136	0.571429	0.647059	-0.644444	-0.571429	0.807692	0.614286	0.714286	-0.135135	0.311475	-0.707317	0	-0.913044	0.52381	0.0909091	0.566667	0.125	0.326531	0.534884	-0.533333		-0.2
																		0.979592	0.594595	0.962264	0.878613	0.76	0.392857	-0.891068	0.325301	-0.948718	0.938461	0.288136	0.571429	0.647059	-0.644444	-0.571429	0.807692	0.614286	0.714286	-0.135135	0.311475	-0.707317	0	-0.913044	0.52381	0.0909091	0.566667	0.125	0.326531	0.534884	-0.533333		-0.2
																		0.979592	0.594595	0.962264	0.878613	0.76	0.392857	-0.891068	0.325301	-0.948718	0.938461	0.288136	0.571429	0.647059	-0.644444	-0.571429	0.807692	0.614286	0.714286	-0.135135	0.311475	-0.707317	0	-0.913044	0.52381	0.0909091	0.566667	0.125	0.326531	0.534884	-0.533333		-0.2
																		0.979592	0.605263	0.962264	0.878613	0.76	0.392857	-0.891068	0.325301	-0.948718	0.938461	0.288136	0.571429	0.647059	-0.644444	-0.571429	0.807692	0.614286	0.714286	-0.135135	0.311475	-0.707317	0	-0.913044	0.52381	0.0909091	0.566667	0.125	0.326531	0.534884	-0.533333		-0.2
																		0.979592	0.61039	0.962264	0.878613	0.76	0.392857	-0.891068	0.325301	-0.948718	0.938461	0.288136	0.571429	0.647059	-0.644444	-0.571429	0.807692	0.614286	0.714286	-0.135135	0.311475	-0.707317	0	-0.913044	0.52381	0.0909091	0.566667	0.125	0.326531	0.534884	-0.533333		-0.2
																		0.979592	0.61039	0.962264	0.878613	0.76	0.392857	-0.891068	0.325301	-0.948718	0.938461	0.288136	0.571429	0.647059	-0.644444	-0.571429	0.807692	0.614286	0.714286	-0.135135	0.311475	-0.707317	0	-0.913044	0.52381	0.0909091	0.566667	0.125	0.326531	0.534884	-0.533333		-0.2
																		0.979592	0.615385	0.962264	0.878613	0.76	0.392857	-0.891068	0.325301	-0.948718	0.938461	0.288136	0.571429	0.647059	-0.644444	-0.571429	0.807692	0.614286	0.714286	-0.135135	0.311475	-0.707317	0	-0.913044	0.52381	0.0909091	0.566667	0.125	0.326531	0.534884	-0.533333		-0.2
																		0.979592	0.615385	0.962264	0.878613	0.76	0.392857	-0.891068	0.325301	-0.948718	0.938461	0.288136	0.571429	0.647059	-0.644444	-0.571429	0.807692	0.614286	0.714286	-0.135135	0.311475	-0.707317	0	-0.913044	0.52381	0.0909091	0.566667	0.125	0.326531	0.534884	-0.533333		-0.2
																		0.979592	0.62963	0.962264	0.878613	0.76	0.392857	-0.891068	0.325301	-0.953488	0.942857	0.288136	0.571429	0.647059	-0.644444	-0.571429	0.807692	0.614286	0.714286	-0.135135	0.311475	-0.707317	0	-0.913044	0.52381	0.0909091	0.566667	0.125	0.326531	0.534884	-0.533333		-0.2
																		0.979592	0.634146	0.962264	0.878613	0.76	0.392857	-0.891068	0.325301	-0.959184	0.943662	0.288136	0.571429	0.647059	-0.644444	-0.571429	0.807692	0.614286	0.714286	-0.135135	0.311475	-0.707317	0	-0.913044	0.52381	0.0909091	0.566667	0.125	0.326531	0.534884	-0.533333		-0.2
																		0.979592	0.642857	0.962264	0.878613	0.76	0.392857	-0.891068	0.325301	-0.962963	0.945206	0.288136	0.571429	0.647059	-0.644444	-0.571429	0.807692	0.614286	0.714286	-0.135135	0.311475	-0.707317	0	-0.913044	0.52381	0.0909091	0.566667	0.125	0.326531	0.534884	-0.533333		-0.2
																		0.979592	0.642857	0.962264	0.878613	0.76	0.392857	-0.891068	0.325301	-0.962963	0.945946	0.288136	0.571429	0.647059	-0.644444	-0.571429	0.807692	0.614286	0.714286	-0.135135	0.311475	-0.707317	0	-0.913044	0.52381	0.0909091	0.566667	0.125	0.326531	0.534884	-0.533333		-0.2
																		0.979592	0.651163	0.962264	0.878613	0.76	0.392857	-0.891068	0.325301	-0.962963	0.948052	0.288136	0.571429	0.647059	-0.644444	-0.571429	0.807692	0.614286	0.714286	-0.135135	0.311475	-0.707317	0	-0.913044	0.52381	0.0909091	0.566667	0.125	0.326531	0.534884	-0.533333		-0.2
																		0.979592	0.651163	0.962264	0.878613	0.76	0.392857	-0.891068	0.325301	-0.962963	0.952381	0.288136	0.571429	0.647059	-0.644444	-0.571429	0.807692	0.614286	0.714286	-0.135135	0.311475	-0.707317	0	-0.913044	0.52381	0.0909091	0.566667	0.125	0.326531	0.534884	-0.533333		-0.2
																		0.979592	0.655172	0.962264	0.878613	0.76	0.39645	-0.891068	0.325301	-0.962963	0.954023	0.288136	0.571429	0.647059	-0.644444	-0.571429	0.807692	0.614286	0.714286	-0.135135	0.311475	-0.707317	0	-0.913044	0.52381	0.0909091	0.566667	0.125	0.326531	0.534884	-0.533333		-0.2
																		0.979592	0.655172	0.962264	0.878613	0.76	0.39645	-0.891068	0.325301	-0.962963	0.954023	0.288136	0.571429	0.647059	-0.644444	-0.571429	0.807692	0.614286	0.714286	-0.135135	0.311475	-0.707317	0	-0.913044	0.52381	0.0909091	0.566667	0.125	0.326531	0.534884	-0.533333		-0.2
																		0.979592	0.659091	0.962264	0.878613	0.76	0.39645	-0.891068	0.325301	-0.962963	0.954023	0.288136	0.571429	0.647059	-0.644444	-0.571429	0.807692	0.614286	0.714286	-0.135135	0.311475	-0.707317	0	-0.913044	0.52381	0.0909091	0.566667	0.125	0.326531	0.534884	-0.533333		-0.2
																		0.979592	0.666667	0.962264	0.878613	0.76	0.39645	-0.891068	0.325301	-0.962963	0.954545	0.288136	0.517241	0.647059	-0.644444	-0.571429	0.807692	0.614286	0.714286	-0.135135	0.311475	-0.707317	0	-0.913044	0.52381	0.0909091	0.566667	0.125	0.326531	0.534884	-0.533333		-0.2
																		0.979592	0.67033	0.962264	0.878613	0.76	0.39645	-0.891068	0.325301	-0.962963	0.956044	0.288136	0.517241	0.647059	-0.644444	-0.571429	0.807692	0.614286	0.714286	-0.135135	0.311475	-0.707317	0	-0.913044	0.52381	0.0909091	0.566667	0.125	0.326531	0.534884	-0.533333		-0.2
																		0.979592	0.677419	0.962264	0.878613	0.76	0.39645	-0.891068	0.325301	-0.962963	0.956044	0.288136	0.517241	0.647059	-0.644444	-0.571429	0.807692	0.614286	0.714286	-0.135135	0.311475	-0.707317	0	-0.913044	0.52381	0.0909091	0.566667	0.125	0.326531	0.534884	-0.533333		-0.2
																		0.98	0.684211	0.962264	0.878613	0.76	0.39645	-0.891068	0.325301	-0.962963	0.956044	0.288136	0.517241	0.647059	-0.644444	-0.571429	0.807692	0.614286	0.714286	-0.135135	0.311475	-0.707317	0	-0.913044	0.52381	0.0909091	0.566667	0.125	0.326531	0.534884	-0.533333		-0.2
																		0.98	0.690722	0.962264	0.878613	0.76	0.39645	-0.891068	0.325301	-0.962963	0.956522	0.288136	0.517241	0.647059	-0.644444	-0.571429	0.807692	0.614286	0.714286	-0.135135	0.311475	-0.707317	0	-0.913044	0.52381	0.0909091	0.566667	0.125	0.326531	0.534884	-0.533333		-0.2
																		0.98	0.690722	0.962264	0.878613	0.76	0.39645	-0.891068	0.325301	-0.962963	0.956522	0.288136	0.517241	0.647059	-0.644444	-0.571429	0.807692	0.614286	0.714286	-0.135135	0.311475	-0.707317	0	-0.913044	0.52381	0.0909091	0.566667	0.125	0.326531	0.534884	-0.533333		-0.2
																		0.98	0.690722	0.962264	0.878613	0.76	0.39645	-0.891068	0.325301	-0.962963	0.956522	0.288136	0.517241	0.647059	-0.644444	-0.571429	0.807692	0.614286	0.714286	-0.135135	0.311475	-0.707317	0	-0.913044	0.52381	0.0909091	0.566667	0.125	0.326531	0.534884	-0.533333		-0.2
																		0.98	0.690722	0.962264	0.878613	0.76	0.39645	-0.891068	0.325301	-0.962963	0.956522	0.288136	0.517241	0.647059	-0.644444	-0.571429	0.807692	0.614286	0.714286	-0.135135	0.311475	-0.707317	0	-0.913044	0.52381	0.0909091	0.566667	0.125	0.326531	0.534884	-0.533333		-0.2
																		0.98	0.690722	0.962264	0.878613	0.76	0.39645	-0.891068	0.325301	-0.962963	0.958333	0.288136	0.517241	0.647059	-0.644444	-0.571429	0.807692	0.614286	0.714286	-0.135135	0.311475	-0.707317	0	-0.913044	0.52381	0.0909091	0.566667	0.125	0.326531	0.534884	-0.533333		-0.2
																		0.98	0.7	0.962264	0.878613	0.76	0.39645	-0.891068	0.325301	-0.962963	0.959184	0.288136	0.517241	0.647059	-0.644444	-0.571429	0.807692	0.614286	0.714286	-0.135135	0.311475	-0.707317	0	-0.913044	0.52381	0.0909091	0.566667	0.125	0.326531	0.534884	-0.533333		-0.2
																		0.98	0.705882	0.962264	0.878613	0.76	0.39645	-0.891068	0.325301	-0.962963	0.96	0.288136	0.517241	0.647059	-0.644444	-0.571429	0.807692	0.614286	0.714286	-0.135135	0.311475	-0.707317	0	-0.913044	0.52381	0.0909091	0.566667	0.125	0.326531	0.534884	-0.533333		-0.2
																		0.98	0.714286	0.962264	0.878613	0.76	0.39645	-0.891068	0.325301	-0.962963	0.961538	0.288136	0.517241	0.647059	-0.644444	-0.571429	0.807692	0.614286	0.714286	-0.135135	0.311475	-0.707317	0	-0.913044	0.52381	0.0909091	0.566667	0.125	0.326531	0.534884	-0.533333		-0.2
																		0.98	0.724771	0.962264	0.878613	0.76	0.39645	-0.891068	0.325301	-0.962963	0.961538	0.288136	0.517241	0.647059	-0.644444	-0.571429	0.807692	0.614286	0.714286	-0.135135	0.311475	-0.707317	0	-0.913044	0.52381	0.0909091	0.566667	0.125	0.326531	0.534884	-0.533333		-0.2
																		0.98	0.724771	0.962264	0.878613	0.76	0.39645	-0.891068	0.309524	-0.962963	0.961538	0.288136	0.517241	0.647059	-0.644444	-0.571429	0.807692	0.614286	0.714286	-0.135135	0.311475	-0.707317	0	-0.913044	0.52381	0.0909091	0.566667	0.125	0.326531	0.534884	-0.533333		-0.2
																		0.98	0.727273	0.962264	0.878613	0.76	0.39645	-0.891068	0.309524	-0.962963	0.961538	0.288136	0.517241	0.647059	-0.644444	-0.571429	0.807692	0.614286	0.714286	-0.135135	0.311475	-0.707317	0	-0.913044	0.52381	0.0909091	0.566667	0.125	0.326531	0.534884	-0.533333		-0.2
																		0.98	0.72973	0.962264	0.878613	0.76	0.39645	-0.891068	0.309524	-0.962963	0.961538	0.288136	0.517241	0.647059	-0.644444	-0.571429	0.807692	0.614286	0.714286	-0.135135	0.311475	-0.707317	0	-0.913044	0.52381	0.0909091	0.566667	0.125	0.326531	0.534884	-0.533333		-0.2
																		0.98	0.72973	0.962264	0.878613	0.76	0.39645	-0.891068	0.309524	-0.962963	0.961538	0.288136	0.517241	0.647059	-0.644444	-0.571429	0.807692	0.614286	0.714286	-0.135135	0.311475	-0.707317	0	-0.913044	0.52381	0.0909091	0.566667	0.125	0.326531	0.534884	-0.533333		-0.2
																		0.98	0.72973	0.962264	0.878613	0.76	0.39645	-0.891068	0.309524	-0.962963	0.961538	0.288136	0.517241	0.647059	-0.644444	-0.571429	0.807692	0.614286	0.714286	-0.135135	0.311475	-0.707317	0	-0.913044	0.52381	0.0909091	0.566667	0.125	0.326531	0.534884	-0.533333		-0.2
																		0.98	0.72973	0.962264	0.878613	0.76	0.39645	-0.891068	0.309524	-0.962963	0.961538	0.288136	0.517241	0.647059	-0.644444	-0.571429	0.807692	0.614286	0.714286	-0.135135	0.311475	-0.707317	0	-0.913044	0.533333	0.0909091	0.566667	0.125	0.326531	0.534884	-0.533333		-0.2
																		0.98	0.72973	0.962264	0.878613	0.76	0.39645	-0.891068	0.309524	-0.962963	0.961538	0.288136	0.517241	0.647059	-0.644444	-0.571429	0.807692	0.614286	0.714286	-0.135135	0.311475	-0.707317	0	-0.913044	0.551282	0.0909091	0.566667	0.125	0.326531	0.534884	-0.533333		-0.2
																		0.98	0.72973	0.962264	0.878613	0.76	0.39645	-0.891068	0.309524	-0.962963	0.961538	0.288136	0.517241	0.647059	-0.644444	-0.571429	0.807692	0.614286	0.714286	-0.135135	0.311475	-0.707317	0	-0.913044	0.570552	0.0909091	0.566667	0.125	0.326531	0.534884	-0.533333		-0.2
																		0.98	0.72973	0.962264	0.878613	0.76	0.39645	-0.891068	0.309524	-0.962963	0.961538	0.288136	0.517241	0.647059	-0.644444	-0.571429	0.830508	0.614286	0.714286	-0.135135	0.311475	-0.707317	0	-0.913044	0.593023	0.0909091	0.566667	0.125	0.238095	0.534884	-0.533333		-0.2
																		0.98	0.72973	0.962264	0.878613	0.76	0.39645	-0.891068	0.309524	-0.962963	0.961538	0.288136	0.517241	0.647059	-0.644444	-0.571429	0.852941	0.614286	0.714286	-0.135135	0.311475	-0.707317	0	-0.913044	0.611111	0.0909091	0.566667	0.125	0.203704	0.534884	-0.533333		-0.2
																		0.98	0.72973	0.962264	0.878613	0.76	0.39645	-0.891068	0.309524	-0.962963	0.961538	0.288136	0.517241	0.647059	-0.644444	-0.571429	0.852941	0.614286	0.714286	-0.135135	0.311475	-0.707317	0	-0.913044	0.62963	0.0909091	0.566667	0.125	0.171171	0.534884	-0.533333		-0.2
																		0.98	0.72973	0.962264	0.878613	0.76	0.39645	-0.891068	0.309524	-0.962963	0.961538	0.288136	0.517241	0.647059	-0.644444	-0.571429	0.852941	0.614286	0.714286	-0.135135	0.311475	-0.707317	0	-0.913044	0.64467	0.0909091	0.566667	0.125	0.130435	0.534884	-0.533333		-0.2
																		0.98	0.72973	0.962264	0.878613	0.76	0.39645	-0.891068	0.309524	-0.962963	0.961538	0.288136	0.517241	0.647059	-0.644444	-0.571429	0.852941	0.614286	0.714286	-0.135135	0.311475	-0.707317	0	-0.913044	0.660194	0.0909091	0.566667	0.125	0.092437	0.534884	-0.533333		-0.2
																		0.98	0.72973	0.962264	0.878613	0.76	0.39645	-0.891068	0.309524	-0.962963	0.961538	0.288136	0.517241	0.647059	-0.644444	-0.571429	0.852941	0.614286	0.714286	-0.135135	0.311475	-0.707317	0	-0.913044	0.661836	0.0909091	0.566667	0.125	0.0833333	0.534884	-0.533333		-0.2
																		0.98	0.72973	0.962264	0.878613	0.76	0.39645	-0.891068	0.309524	-0.962963	0.961538	0.288136	0.517241	0.647059	-0.644444	-0.571429	0.852941	0.614286	0.714286	-0.135135	0.311475	-0.707317	0	-0.913044	0.661836	0.0909091	0.566667	0.125	0.0655738	0.534884	-0.533333		-0.2
																		0.98	0.72973	0.962264	0.878613	0.76	0.39645	-0.891068	0.309524	-0.962963	0.961538	0.288136	0.517241	0.647059	-0.644444	-0.571429	0.852941	0.614286	0.714286	-0.135135	0.311475	-0.707317	0	-0.913044	0.661836	0.0909091	0.566667	0.125	-0.0151515	0.534884	-0.533333		-0.2
																		0.98	0.72973	0.962264	0.878613	0.76	0.39645	-0.891068	0.309524	-0.962963	0.961538	0.288136	0.517241	0.647059	-0.644444	-0.571429	0.852941	0.614286	0.714286	-0.135135	0.311475	-0.707317	0	-0.913044	0.661836	0.0909091	0.566667	0.125	-0.057971	0.534884	-0.533333		-0.2
																		0.98	0.72973	0.962264	0.878613	0.76	0.39645	-0.891068	0.309524	-0.962963	0.961538	0.288136	0.517241	0.647059	-0.644444	-0.571429	0.852941	0.614286	0.714286	-0.135135	0.311475	-0.707317	0	-0.913044	0.661836	0.0909091	0.566667	0.125	-0.0714286	0.534884	-0.533333		-0.2
																		0.98	0.72973	0.962264	0.878613	0.76	0.39645	-0.891068	0.309524	-0.962963	0.961538	0.288136	0.517241	0.647059	-0.644444	-0.571429	0.852941	0.614286	0.714286	-0.135135	0.311475	-0.707317	0	-0.913044	0.661836	0.0909091	0.566667	0.125	-0.0714286	0.534884	-0.533333		-0.2
																		0.98	0.72973	0.962264	0.878613	0.76	0.39645	-0.891068	0.309524	-0.962963	0.961538	0.288136	0.517241	0.647059	-0.644444	-0.571429	0.852941	0.614286	0.714286	-0.135135	0.311475	-0.707317	0	-0.913044	0.661836	0.0909091	0.566667	0.125	-0.0714286	0.534884	-0.533333		-0.2
																		0.98	0.72973	0.962264	0.878613	0.76	0.39645	-0.891068	0.309524	-0.962963	0.961538	0.288136	0.517241	0.647059	-0.644444	-0.571429	0.852941	0.614286	0.714286	-0.135135	0.311475	-0.707317	0	-0.913044	0.661836	0.0909091	0.566667	0.125	-0.0714286	0.534884	-0.533333		-0.2
																		0.98	0.72973	0.962264	0.878613	0.76	0.39645	-0.891068	0.309524	-0.962963	0.961538	0.288136	0.517241	0.647059	-0.644444	-0.571429	0.852941	0.614286	0.714286	-0.135135	0.311475	-0.707317	0	-0.913044	0.661836	0.0909091	0.566667	0.125	-0.0714286	0.534884	-0.533333		-0.2
																		0.98	0.72973	0.962264	0.878613	0.76	0.39645	-0.891068	0.309524	-0.962963	0.961538	0.288136	0.517241	0.647059	-0.644444	-0.571429	0.852941	0.614286	0.714286	-0.135135	0.311475	-0.707317	0	-0.913044	0.661836	0.0909091	0.566667	0.125	-0.0714286	0.534884	-0.533333		-0.2
																		0.98	0.72973	0.962264	0.878613	0.76	0.39645	-0.891068	0.309524	-0.962963	0.961538	0.288136	0.517241	0.647059	-0.644444	-0.571429	0.852941	0.614286	0.714286	-0.135135	0.311475	-0.707317	0	-0.913044	0.661836	0.0909091	0.566667	0.125	-0.0714286	0.534884	-0.533333		-0.2
																		0.98	0.72973	0.962264	0.878613	0.76	0.39645	-0.891068	0.309524	-0.962963	0.961538	0.288136	0.517241	0.647059	-0.644444	-0.571429	0.852941	0.614286	0.714286	-0.135135	0.311475	-0.707317	0	-0.913044	0.661836	0.0909091	0.566667	0.125	-0.0714286	0.534884	-0.533333		-0.2
																		0.98	0.72973	0.962264	0.878613	0.76	0.39645	-0.891068	0.309524	-0.962963	0.961538	0.288136	0.517241	0.647059	-0.644444	-0.571429	0.852941	0.614286	0.714286	-0.135135	0.311475	-0.707317	0	-0.913044	0.661836	0.0909091	0.566667	0.125	-0.0714286	0.534884	-0.533333		-0.2
																		0.98	0.72973	0.962264	0.878613	0.76	0.39645	-0.891068	0.309524	-0.962963	0.961538	0.288136	0.517241	0.647059	-0.644444	-0.571429	0.852941	0.614286	0.714286	-0.135135	0.311475	-0.707317	0	-0.913044	0.661836	0.0909091	0.566667	0.125	-0.0714286	0.534884	-0.533333		-0.2
																		0.98	0.72973	0.962264	0.878613	0.76	0.39645	-0.891068	0.309524	-0.962963	0.961538	0.288136	0.517241	0.647059	-0.644444	-0.571429	0.852941	0.614286	0.714286	-0.135135	0.311475	-0.707317	0	-0.913044	0.661836	0.0909091	0.566667	0.125	-0.0714286	0.534884	-0.533333		-0.2
																		0.98	0.72973	0.962264	0.878613	0.76	0.39645	-0.891068	0.309524	-0.962963	0.961538	0.288136	0.517241	0.647059	-0.644444	-0.571429	0.852941	0.614286	0.714286	-0.135135	0.311475	-0.707317	0	-0.913044	0.661836	0.0909091	0.566667	0.125	-0.0714286	0.534884	-0.533333		-0.2
																		0.98	0.72973	0.962264	0.878613	0.76	0.39645	-0.891068	0.309524	-0.962963	0.961538	0.288136	0.517241	0.647059	-0.644444	-0.571429	0.852941	0.614286	0.714286	-0.135135	0.311475	-0.707317	0	-0.913044	0.661836	0.0909091	0.566667	0.125	-0.0714286	0.534884	-0.533333		-0.2
																		0.98	0.72973	0.962264	0.878613	0.761905	0.39645	-0.891068	0.309524	-0.962963	0.961538	0.288136	0.517241	0.647059	-0.644444	-0.571429	0.852941	0.614286	0.714286	-0.135135	0.311475	-0.707317	0	-0.913044	0.661836	0.0909091	0.566667	0.125	-0.0714286	0.534884	-0.533333		-0.2
																		0.98	0.72973	0.962264	0.878613	0.761905	0.39645	-0.891068	0.309524	-0.962963	0.961538	0.288136	0.517241	0.647059	-0.644444	-0.571429	0.852941	0.614286	0.714286	-0.135135	0.311475	-0.707317	0	-0.913044	0.661836	0.0909091	0.566667	0.125	-0.0714286	0.534884	-0.533333		-0.2
																		0.98	0.72973	0.962264	0.878613	0.761905	0.39645	-0.891068	0.309524	-0.962963	0.961538	0.288136	0.517241	0.647059	-0.644444	-0.571429	0.852941	0.614286	0.714286	-0.135135	0.311475	-0.707317	0	-0.913044	0.661836	0.0909091	0.566667	0.125	-0.0714286	0.534884	-0.533333		-0.2
																		0.98	0.72973	0.962264	0.878613	0.761905	0.39645	-0.891068	0.309524	-0.962963	0.961538	0.288136	0.517241	0.647059	-0.644444	-0.571429	0.852941	0.614286	0.714286	-0.135135	0.311475	-0.707317	0	-0.913044	0.661836	0.0909091	0.566667	0.125	-0.0714286	0.534884	-0.533333		-0.2
																		0.98	0.72973	0.962264	0.878613	0.761905	0.39645	-0.891068	0.309524	-0.962963	0.961538	0.288136	0.517241	0.647059	-0.644444	-0.571429	0.852941	0.614286	0.714286	-0.135135	0.311475	-0.707317	0	-0.913044	0.661836	0.0909091	0.566667	0.125	-0.0714286	0.534884	-0.533333		-0.2
																		0.98	0.72973	0.962264	0.878613	0.761905	0.39645	-0.891068	0.309524	-0.962963	0.961538	0.288136	0.517241	0.647059	-0.644444	-0.571429	0.852941	0.614286	0.714286	-0.135135	0.311475	-0.707317	0	-0.913044	0.661836	0.0909091	0.566667	0.125	-0.0714286	0.534884	-0.533333		-0.2
																		0.98	0.72973	0.962264	0.878613	0.761905	0.39645	-0.891068	0.309524	-0.962963	0.961538	0.288136	0.517241	0.647059	-0.644444	-0.571429	0.852941	0.614286	0.714286	-0.135135	0.311475	-0.707317	0	-0.913044	0.661836	0.0909091	0.566667	0.125	-0.0714286	0.534884	-0.533333		-0.2
																		0.98	0.72973	0.962264	0.878613	0.761905	0.39645	-0.891068	0.309524	-0.962963	0.961538	0.288136	0.533333	0.647059	-0.644444	-0.571429	0.852941	0.614286	0.714286	-0.135135	0.311475	-0.707317	0	-0.913044	0.661836	0.0909091	0.566667	0.125	-0.0714286	0.534884	-0.533333		-0.2
																		0.98	0.72973	0.962264	0.878613	0.761905	0.39645	-0.891068	0.309524	-0.962963	0.961538	0.288136	0.533333	0.647059	-0.644444	-0.571429	0.852941	0.614286	0.714286	-0.135135	0.311475	-0.707317	0	-0.913044	0.661836	0.0909091	0.566667	0.125	-0.0714286	0.534884	-0.533333		-0.2
																		0.98	0.72973	0.962264	0.878613	0.761905	0.39645	-0.891068	0.309524	-0.962963	0.961538	0.288136	0.533333	0.647059	-0.644444	-0.571429	0.852941	0.614286	0.714286	-0.135135	0.311475	-0.707317	0	-0.913044	0.661836	0.0909091	0.566667	0.125	-0.0714286	0.534884	-0.533333		-0.2
																		0.98	0.72973	0.962264	0.878613	0.761905	0.39645	-0.891068	0.309524	-0.962963	0.961538	0.288136	0.533333	0.647059	-0.644444	-0.571429	0.852941	0.614286	0.714286	-0.135135	0.311475	-0.707317	0	-0.913044	0.661836	0.0909091	0.566667	0.125	-0.0714286	0.534884	-0.533333		-0.2
																		0.98	0.72973	0.962264	0.878613	0.761905	0.39645	-0.891068	0.309524	-0.962963	0.961538	0.288136	0.533333	0.647059	-0.644444	-0.571429	0.852941	0.614286	0.714286	-0.135135	0.311475	-0.707317	0	-0.913044	0.661836	0.0909091	0.566667	0.125	-0.0714286	0.534884	-0.533333		-0.2
																		0.98	0.72973	0.962264	0.878613	0.761905	0.39645	-0.891068	0.309524	-0.962963	0.961538	0.288136	0.533333	0.647059	-0.644444	-0.571429	0.852941	0.614286	0.714286	-0.135135	0.311475	-0.707317	0	-0.913044	0.661836	0.0909091	0.566667	0.125	-0.0714286	0.534884	-0.533333		-0.2
																		0.98	0.72973	0.962264	0.878613	0.761905	0.39645	-0.891068	0.309524	-0.962963	0.961538	0.288136	0.533333	0.647059	-0.644444	-0.571429	0.852941	0.614286	0.714286	-0.135135	0.311475	-0.707317	0	-0.913044	0.661836	0.0909091	0.566667	0.125	-0.0714286	0.534884	-0.533333		-0.2
																		0.98	0.72973	0.962264	0.878613	0.761905	0.39645	-0.891068	0.309524	-0.962963	0.961538	0.288136	0.533333	0.647059	-0.644444	-0.571429	0.852941	0.614286	0.714286	-0.135135	0.328	-0.707317	0	-0.913044	0.661836	0.0909091	0.566667	0.125	-0.0714286	0.534884	-0.533333		-0.2
																		0.98	0.72973	0.962264	0.878613	0.761905	0.39645	-0.891068	0.309524	-0.962963	0.961538	0.288136	0.533333	0.647059	-0.644444	-0.571429	0.852941	0.614286	0.714286	-0.135135	0.338583	-0.707317	0	-0.913044	0.661836	0.0909091	0.566667	0.125	-0.0714286	0.534884	-0.533333		-0.2
																		0.980198	0.72973	0.962264	0.878613	0.761905	0.39645	-0.891068	0.309524	-0.962963	0.961538	0.288136	0.533333	0.647059	-0.644444	-0.571429	0.852941	0.614286	0.714286	-0.135135	0.34375	-0.707317	0	-0.913044	0.661836	0.0909091	0.566667	0.125	-0.0714286	0.534884	-0.533333		-0.2
																		0.980198	0.72973	0.962264	0.878613	0.761905	0.39645	-0.891068	0.309524	-0.962963	0.961538	0.288136	0.533333	0.647059	-0.644444	-0.571429	0.852941	0.614286	0.714286	-0.135135	0.348837	-0.707317	0	-0.913044	0.661836	0.0909091	0.566667	0.125	-0.0714286	0.534884	-0.533333		-0.2
																		0.980198	0.72973	0.962264	0.878613	0.761905	0.39645	-0.891068	0.309524	-0.962963	0.961538	0.288136	0.533333	0.647059	-0.644444	-0.571429	0.852941	0.614286	0.714286	-0.135135	0.373134	-0.707317	0	-0.913044	0.661836	0.0909091	0.566667	0.125	-0.0714286	0.534884	-0.533333		-0.2
																		0.980198	0.72973	0.962264	0.878613	0.761905	0.39645	-0.891068	0.309524	-0.962963	0.961538	0.288136	0.533333	0.647059	-0.644444	-0.571429	0.852941	0.614286	0.714286	-0.135135	0.404255	-0.707317	0	-0.913044	0.661836	0.0909091	0.566667	0.125	-0.0714286	0.534884	-0.533333		-0.2
																		0.980198	0.72973	0.962264	0.878613	0.761905	0.39645	-0.891068	0.309524	-0.962963	0.961538	0.288136	0.533333	0.647059	-0.644444	-0.571429	0.852941	0.614286	0.714286	-0.135135	0.408451	-0.707317	0	-0.913044	0.661836	0.0909091	0.566667	0.125	-0.0714286	0.534884	-0.533333		-0.2
																		0.980198	0.72973	0.962264	0.878613	0.761905	0.39645	-0.891068	0.309524	-0.962963	0.961538	0.288136	0.533333	0.647059	-0.644444	-0.571429	0.852941	0.614286	0.714286	-0.135135	0.408451	-0.707317	0	-0.913044	0.661836	0.0909091	0.566667	0.125	-0.0714286	0.534884	-0.533333		-0.2
																		0.980198	0.72973	0.962264	0.878613	0.761905	0.39645	-0.891068	0.309524	-0.962963	0.961538	0.288136	0.533333	0.647059	-0.644444	-0.571429	0.852941	0.614286	0.714286	-0.135135	0.408451	-0.707317	0	-0.913044	0.661836	0.0909091	0.566667	0.125	-0.0714286	0.534884	-0.533333		-0.2
																		0.980198	0.72973	0.962264	0.878613	0.761905	0.39645	-0.891068	0.309524	-0.962963	0.961538	0.288136	0.533333	0.647059	-0.644444	-0.571429	0.852941	0.614286	0.714286	-0.135135	0.408451	-0.707317	0	-0.913044	0.661836	0.0909091	0.566667	0.125	-0.0714286	0.534884	-0.533333		-0.2
																		0.980198	0.72973	0.962264	0.878613	0.761905	0.39645	-0.891068	0.309524	-0.962963	0.961538	0.288136	0.533333	0.647059	-0.644444	-0.571429	0.852941	0.614286	0.714286	-0.135135	0.388889	-0.707317	0	-0.913044	0.661836	0.0909091	0.566667	0.125	-0.0714286	0.534884	-0.533333		-0.2
																		0.980198	0.72973	0.962264	0.878613	0.761905	0.39645	-0.891068	0.309524	-0.962963	0.961538	0.288136	0.533333	0.647059	-0.644444	-0.571429	0.852941	0.614286	0.714286	-0.135135	0.37931	-0.707317	0	-0.913044	0.661836	0.0909091	0.566667	0.125	-0.0714286	0.534884	-0.533333		-0.2
																		0.980198	0.72973	0.962264	0.878613	0.761905	0.39645	-0.891068	0.309524	-0.962963	0.961538	0.288136	0.533333	0.647059	-0.644444	-0.571429	0.852941	0.614286	0.714286	-0.135135	0.37931	-0.707317	0	-0.913044	0.661836	0.0909091	0.566667	0.125	-0.0714286	0.534884	-0.533333		-0.2
																		0.980198	0.72973	0.962264	0.878613	0.761905	0.39645	-0.891068	0.309524	-0.962963	0.961538	0.288136	0.533333	0.647059	-0.644444	-0.571429	0.852941	0.614286	0.714286	-0.135135	0.37931	-0.707317	0	-0.913044	0.661836	0.0909091	0.566667	0.125	-0.0714286	0.534884	-0.533333		-0.2
																		0.980198	0.72973	0.962264	0.878613	0.761905	0.39645	-0.891068	0.309524	-0.962963	0.961538	0.288136	0.533333	0.647059	-0.644444	-0.571429	0.852941	0.614286	0.714286	-0.135135	0.37931	-0.707317	0	-0.913044	0.661836	0.0909091	0.566667	0.125	-0.0714286	0.534884	-0.533333		-0.2
																		0.980198	0.72973	0.962264	0.878613	0.761905	0.39645	-0.891068	0.309524	-0.962963	0.961538	0.288136	0.533333	0.647059	-0.644444	-0.571429	0.852941	0.614286	0.714286	-0.135135	0.37931	-0.707317	0	-0.913044	0.661836	0.0909091	0.566667	0.125	-0.0714286	0.534884	-0.533333		-0.2
																		0.980198	0.72973	0.962264	0.878613	0.761905	0.39645	-0.891068	0.309524	-0.962963	0.961538	0.288136	0.533333	0.647059	-0.644444	-0.571429	0.852941	0.614286	0.714286	-0.135135	0.37931	-0.707317	0	-0.913044	0.661836	0.0909091	0.566667	0.125	-0.0714286	0.534884	-0.533333		-0.2
																		0.980198	0.72973	0.962264	0.878613	0.763779	0.39645	-0.891068	0.309524	-0.962963	0.961538	0.288136	0.533333	0.647059	-0.644444	-0.571429	0.852941	0.614286	0.714286	-0.135135	0.37931	-0.707317	0	-0.913044	0.661836	0.0909091	0.566667	0.125	-0.0714286	0.534884	-0.533333		-0.2
																		0.980198	0.72973	0.962264	0.878613	0.763779	0.39645	-0.891068	0.309524	-0.962963	0.961538	0.288136	0.533333	0.647059	-0.644444	-0.571429	0.852941	0.614286	0.714286	-0.135135	0.37931	-0.707317	0	-0.913044	0.661836	0.145299	0.566667	0.125	-0.0714286	0.534884	-0.533333		-0.2
																		0.980198	0.72973	0.962264	0.878613	0.763779	0.39645	-0.891068	0.309524	-0.962963	0.961538	0.288136	0.533333	0.647059	-0.644444	-0.571429	0.852941	0.614286	0.714286	-0.135135	0.37931	-0.707317	0	-0.913044	0.661836	0.159664	0.566667	0.125	-0.0714286	0.534884	-0.533333		-0.2
																		0.980198	0.72973	0.962264	0.878613	0.763779	0.39645	-0.891068	0.309524	-0.962963	0.961538	0.288136	0.533333	0.647059	-0.644444	-0.571429	0.852941	0.614286	0.714286	-0.135135	0.37931	-0.707317	0	-0.913044	0.661836	0.193548	0.566667	0.125	-0.0714286	0.534884	-0.533333		-0.2
																		0.980198	0.72973	0.962264	0.878613	0.765625	0.39645	-0.891068	0.309524	-0.962963	0.961905	0.288136	0.533333	0.647059	-0.644444	-0.571429	0.852941	0.614286	0.714286	-0.135135	0.37931	-0.707317	0	-0.913044	0.661836	0.21875	0.566667	0.125	-0.0714286	0.534884	-0.533333		-0.2
																		0.980198	0.72973	0.962264	0.878613	0.765625	0.39645	-0.891068	0.309524	-0.962963	0.961905	0.288136	0.533333	0.647059	-0.644444	-0.571429	0.852941	0.614286	0.714286	-0.135135	0.37931	-0.707317	0	-0.913044	0.661836	0.19084	0.566667	0.125	-0.0714286	0.534884	-0.533333		-0.2
																		0.980198	0.72973	0.962264	0.878613	0.765625	0.39645	-0.891068	0.309524	-0.962963	0.961905	0.288136	0.533333	0.647059	-0.644444	-0.571429	0.852941	0.614286	0.714286	-0.135135	0.37931	-0.707317	0	-0.913044	0.661836	0.19084	0.566667	0.125	-0.0714286	0.534884	-0.533333		-0.2
																		0.980198	0.72973	0.962264	0.878613	0.765625	0.39645	-0.891068	0.309524	-0.962963	0.961905	0.288136	0.533333	0.647059	-0.644444	-0.571429	0.852941	0.614286	0.714286	-0.135135	0.37931	-0.707317	0	-0.913044	0.661836	0.19084	0.566667	0.125	-0.0714286	0.534884	-0.533333		-0.2
																		0.980198	0.72973	0.962264	0.878613	0.765625	0.39645	-0.87473	0.309524	-0.962963	0.961905	0.288136	0.533333	0.647059	-0.644444	-0.571429	0.852941	0.614286	0.714286	-0.135135	0.37931	-0.707317	0	-0.913044	0.661836	0.19084	0.566667	0.125	-0.0714286	0.534884	-0.533333		-0.2
																		0.980198	0.72973	0.962264	0.878613	0.765625	0.39645	-0.858672	0.309524	-0.962963	0.961905	0.288136	0.533333	0.647059	-0.644444	-0.571429	0.852941	0.614286	0.714286	-0.135135	0.37931	-0.707317	0	-0.913044	0.661836	0.19084	0.566667	0.125	-0.0714286	0.534884	-0.533333		-0.2
																		0.980198	0.72973	0.962264	0.878613	0.765625	0.39645	-0.846808	0.309524	-0.962963	0.961905	0.288136	0.533333	0.647059	-0.644444	-0.571429	0.852941	0.614286	0.714286	-0.135135	0.37931	-0.707317	0	-0.913044	0.661836	0.19084	0.566667	0.125	-0.0714286	0.534884	-0.533333		-0.2
																		0.980198	0.72973	0.962264	0.878613	0.765625	0.39645	-0.827368	0.309524	-0.962963	0.961905	0.288136	0.533333	0.647059	-0.644444	-0.571429	0.852941	0.614286	0.714286	-0.135135	0.37931	-0.707317	0	-0.913044	0.661836	0.19084	0.566667	0.125	-0.0714286	0.534884	-0.533333		-0.2
																		0.980198	0.72973	0.962264	0.878613	0.765625	0.39645	-0.808333	0.309524	-0.962963	0.961905	0.288136	0.533333	0.647059	-0.644444	-0.571429	0.852941	0.614286	0.714286	-0.135135	0.37931	-0.707317	0	-0.913044	0.661836	0.19084	0.566667	0.125	-0.0714286	0.534884	-0.533333		-0.2
																		0.980198	0.72973	0.962264	0.878613	0.765625	0.39645	-0.789691	0.317647	-0.962963	0.961905	0.288136	0.533333	0.647059	-0.644444	-0.571429	0.852941	0.614286	0.714286	-0.135135	0.37931	-0.707317	0	-0.913044	0.661836	0.19084	0.566667	0.125	-0.0714286	0.534884	-0.533333		-0.2
																		0.980198	0.72973	0.962264	0.878613	0.765625	0.39645	-0.775051	0.340909	-0.962963	0.961905	0.288136	0.533333	0.647059	-0.644444	-0.571429	0.852941	0.614286	0.714286	-0.135135	0.37931	-0.707317	0	-0.913044	0.661836	0.181818	0.566667	0.125	-0.0714286	0.534884	-0.533333		-0.2
																		0.980198	0.72973	0.962264	0.878613	0.765625	0.39645	-0.775051	0.362637	-0.962963	0.961905	0.288136	0.533333	0.647059	-0.644444	-0.571429	0.852941	0.614286	0.714286	-0.135135	0.37931	-0.707317	0	-0.913044	0.661836	0.181818	0.566667	0.125	-0.0714286	0.534884	-0.533333		-0.2
																		0.980198	0.72973	0.962264	0.878613	0.765625	0.39645	-0.775051	0.382979	-0.962963	0.961905	0.288136	0.533333	0.647059	-0.644444	-0.571429	0.852941	0.614286	0.714286	-0.135135	0.37931	-0.707317	0	-0.913044	0.661836	0.181818	0.566667	0.125	-0.0714286	0.534884	-0.533333		-0.2
																		0.980198	0.72973	0.962264	0.878613	0.765625	0.39645	-0.764228	0.389474	-0.962963	0.961905	0.288136	0.533333	0.647059	-0.644444	-0.571429	0.852941	0.614286	0.714286	-0.135135	0.37931	-0.707317	0	-0.913044	0.661836	0.181818	0.566667	0.125	-0.0714286	0.534884	-0.533333		-0.2
																		0.980198	0.72973	0.962264	0.878613	0.765625	0.39645	-0.753535	0.408163	-0.962963	0.961905	0.288136	0.533333	0.647059	-0.644444	-0.571429	0.852941	0.614286	0.714286	-0.135135	0.37931	-0.707317	0	-0.913044	0.661836	0.181818	0.566667	0.125	-0.0714286	0.534884	-0.533333		-0.2
																		0.980198	0.72973	0.962264	0.878613	0.765625	0.39645	-0.736	0.42	-0.962963	0.961905	0.288136	0.533333	0.647059	-0.644444	-0.571429	0.852941	0.614286	0.714286	-0.135135	0.387755	-0.707317	0	-0.913044	0.661836	0.181818	0.566667	0.125	-0.0714286	0.534884	-0.533333		-0.2
																		0.980198	0.72973	0.962264	0.878613	0.765625	0.39645	-0.732535	0.431373	-0.962963	0.961905	0.288136	0.533333	0.647059	-0.644444	-0.571429	0.852941	0.614286	0.714286	-0.135135	0.387755	-0.707317	0	-0.913044	0.661836	0.181818	0.566667	0.125	-0.0714286	0.534884	-0.533333		-0.2
																		0.980198	0.72973	0.962264	0.878613	0.765625	0.39645	-0.722222	0.436893	-0.962963	0.961905	0.288136	0.533333	0.647059	-0.644444	-0.571429	0.852941	0.614286	0.714286	-0.135135	0.350993	-0.707317	0	-0.913044	0.661836	0.181818	0.566667	0.125	-0.0714286	0.534884	-0.533333		-0.2
																		0.980198	0.72973	0.962264	0.878613	0.765625	0.39645	-0.718812	0.447619	-0.962963	0.961905	0.288136	0.533333	0.647059	-0.644444	-0.571429	0.852941	0.614286	0.714286	-0.135135	0.350993	-0.707317	0	-0.913044	0.661836	0.181818	0.566667	0.125	-0.0714286	0.534884	-0.533333		-0.2
																		0.980583	0.72973	0.962264	0.878613	0.765625	0.39645	-0.718812	0.45283	-0.962963	0.961905	0.288136	0.533333	0.647059	-0.644444	-0.571429	0.852941	0.614286	0.714286	-0.135135	0.350993	-0.707317	0	-0.913044	0.661836	0.181818	0.566667	0.125	-0.0714286	0.534884	-0.533333		-0.2
																		0.980583	0.72973	0.962264	0.878613	0.765625	0.39645	-0.715415	0.462963	-0.962963	0.961905	0.288136	0.533333	0.647059	-0.644444	-0.571429	0.852941	0.614286	0.714286	-0.135135	0.350993	-0.707317	0	-0.913044	0.661836	0.181818	0.566667	0.125	-0.0714286	0.534884	-0.533333		-0.2
																		0.980583	0.72973	0.962264	0.878613	0.765625	0.39645	-0.712032	0.472727	-0.962963	0.961905	0.288136	0.533333	0.647059	-0.644444	-0.571429	0.852941	0.614286	0.714286	-0.135135	0.350993	-0.707317	0	-0.913044	0.661836	0.172932	0.566667	0.125	-0.0714286	0.534884	-0.533333		-0.2
																		0.980583	0.72973	0.962264	0.878613	0.765625	0.39645	-0.708661	0.5	-0.962963	0.961905	0.288136	0.533333	0.647059	-0.644444	-0.571429	0.852941	0.614286	0.714286	-0.135135	0.350993	-0.707317	0	-0.913044	0.661836	0.172932	0.566667	0.125	-0.0714286	0.534884	-0.533333		-0.2
																		0.980583	0.72973	0.962264	0.878613	0.765625	0.39645	-0.701961	0.5	-0.962963	0.961905	0.288136	0.533333	0.647059	-0.644444	-0.571429	0.852941	0.614286	0.714286	-0.135135	0.350993	-0.707317	0	-0.913044	0.661836	0.172932	0.566667	0.125	-0.0714286	0.534884	-0.533333		-0.2
																		0.980583	0.72973	0.962264	0.878613	0.765625	0.39645	-0.682171	0.5	-0.962963	0.961905	0.288136	0.533333	0.647059	-0.644444	-0.571429	0.852941	0.614286	0.714286	-0.135135	0.350993	-0.707317	0	-0.913044	0.661836	0.172932	0.566667	0.125	-0.0714286	0.534884	-0.533333		-0.2
																		0.980583	0.72973	0.962264	0.878613	0.765625	0.39645	-0.669231	0.5	-0.962963	0.961905	0.288136	0.533333	0.647059	-0.644444	-0.571429	0.852941	0.614286	0.714286	-0.135135	0.350993	-0.707317	0	-0.913044	0.661836	0.172932	0.566667	0.125	-0.0714286	0.534884	-0.533333		-0.2
																		0.980769	0.72973	0.962264	0.878613	0.765625	0.39645	-0.662835	0.5	-0.962963	0.961905	0.288136	0.533333	0.647059	-0.644444	-0.571429	0.852941	0.614286	0.714286	-0.135135	0.350993	-0.707317	0	-0.913044	0.661836	0.172932	0.566667	0.125	-0.0714286	0.534884	-0.533333		-0.2
																		0.980769	0.72973	0.962264	0.878613	0.765625	0.39645	-0.640832	0.5	-0.962963	0.961905	0.288136	0.533333	0.647059	-0.644444	-0.571429	0.852941	0.614286	0.714286	-0.135135	0.350993	-0.707317	0	-0.913044	0.661836	0.172932	0.566667	0.125	-0.0714286	0.534884	-0.533333		-0.2
																		0.980769	0.72973	0.962264	0.878613	0.765625	0.39645	-0.631579	0.5	-0.962963	0.961905	0.288136	0.533333	0.647059	-0.644444	-0.571429	0.852941	0.614286	0.714286	-0.135135	0.350993	-0.707317	0	-0.913044	0.661836	0.172932	0.566667	0.125	-0.0714286	0.534884	-0.533333		-0.2
																		0.980769	0.72973	0.962264	0.878613	0.765625	0.39645	-0.628518	0.5	-0.962963	0.961905	0.288136	0.533333	0.647059	-0.644444	-0.571429	0.852941	0.614286	0.714286	-0.135135	0.350993	-0.707317	0	-0.913044	0.661836	0.172932	0.566667	0.125	-0.0714286	0.534884	-0.533333		-0.2
																		0.980769	0.72973	0.962264	0.878613	0.765625	0.39645	-0.62243	0.5	-0.962963	0.961905	0.288136	0.533333	0.647059	-0.644444	-0.571429	0.826087	0.614286	0.714286	-0.135135	0.350993	-0.707317	0	-0.913044	0.661836	0.172932	0.566667	0.125	-0.0714286	0.534884	-0.533333		-0.2
																		0.980769	0.72973	0.962264	0.878613	0.765625	0.39645	-0.607407	0.5	-0.962963	0.961905	0.288136	0.533333	0.647059	-0.644444	-0.571429	0.826087	0.614286	0.714286	-0.135135	0.350993	-0.707317	0	-0.913044	0.661836	0.172932	0.566667	0.125	-0.0714286	0.534884	-0.533333		-0.2
																		0.980769	0.72973	0.962264	0.878613	0.765625	0.39645	-0.598527	0.5	-0.962963	0.961905	0.288136	0.533333	0.647059	-0.644444	-0.571429	0.826087	0.614286	0.714286	-0.135135	0.350993	-0.707317	0	-0.913044	0.661836	0.172932	0.566667	0.125	-0.0714286	0.534884	-0.533333		-0.2
																		0.980769	0.72973	0.962264	0.878613	0.765625	0.39645	-0.598527	0.5	-0.962963	0.961905	0.288136	0.533333	0.647059	-0.644444	-0.571429	0.826087	0.614286	0.714286	-0.135135	0.350993	-0.707317	0	-0.913044	0.661836	0.172932	0.566667	0.125	-0.0714286	0.534884	-0.533333		-0.2
																		0.980769	0.72973	0.962264	0.878613	0.765625	0.39645	-0.586837	0.5	-0.962963	0.961905	0.288136	0.533333	0.647059	-0.644444	-0.571429	0.826087	0.614286	0.714286	-0.135135	0.350993	-0.707317	0	-0.913044	0.661836	0.172932	0.566667	0.125	-0.0714286	0.534884	-0.533333		-0.2
																		0.980769	0.72973	0.962264	0.878613	0.765625	0.39645	-0.583942	0.5	-0.962963	0.961905	0.288136	0.533333	0.647059	-0.644444	-0.571429	0.826087	0.614286	0.714286	-0.135135	0.350993	-0.707317	0	-0.913044	0.661836	0.172932	0.566667	0.125	-0.0714286	0.534884	-0.533333		-0.2
																		0.980769	0.72973	0.962264	0.878613	0.765625	0.39645	-0.575318	0.5	-0.962963	0.961905	0.288136	0.533333	0.647059	-0.644444	-0.571429	0.826087	0.614286	0.714286	-0.135135	0.350993	-0.707317	0	-0.913044	0.661836	0.172932	0.566667	0.125	-0.0714286	0.534884	-0.533333		-0.2
																		0.980769	0.72973	0.962264	0.878613	0.765625	0.39645	-0.56962	0.5	-0.962963	0.961905	0.288136	0.533333	0.647059	-0.644444	-0.571429	0.826087	0.614286	0.714286	-0.135135	0.355263	-0.707317	0	-0.913044	0.661836	0.172932	0.566667	0.125	-0.0714286	0.534884	-0.533333		-0.2
																		0.980769	0.72973	0.962264	0.878613	0.767442	0.39645	-0.558348	0.5	-0.962963	0.961905	0.288136	0.533333	0.647059	-0.644444	-0.571429	0.826087	0.614286	0.714286	-0.135135	0.375796	-0.707317	0	-0.913044	0.661836	0.172932	0.566667	0.125	-0.0714286	0.534884	-0.533333		-0.2
																		0.980769	0.72973	0.962264	0.878613	0.767442	0.39645	-0.552773	0.5	-0.962963	0.961905	0.288136	0.533333	0.647059	-0.644444	-0.571429	0.826087	0.602837	0.714286	-0.135135	0.409639	-0.707317	0	-0.913044	0.661836	0.172932	0.566667	0.125	-0.0714286	0.534884	-0.533333		-0.2
																		0.980769	0.72973	0.962264	0.878613	0.767442	0.39645	-0.55	0.5	-0.962963	0.961905	0.288136	0.533333	0.647059	-0.644444	-0.571429	0.826087	0.602837	0.714286	-0.135135	0.409639	-0.707317	0	-0.913044	0.661836	0.172932	0.566667	0.125	-0.0714286	0.534884	-0.533333		-0.2
																		0.980769	0.72973	0.962264	0.878613	0.767442	0.39645	-0.55	0.5	-0.962963	0.961905	0.288136	0.533333	0.647059	-0.644444	-0.571429	0.826087	0.602837	0.714286	-0.135135	0.413174	-0.707317	0	-0.913044	0.661836	0.172932	0.566667	0.125	-0.0714286	0.534884	-0.533333		-0.2
																		0.980769	0.72973	0.962264	0.878613	0.767442	0.39645	-0.533569	0.5	-0.962963	0.961905	0.288136	0.533333	0.647059	-0.644444	-0.571429	0.826087	0.602837	0.714286	-0.135135	0.413174	-0.707317	0	-0.913044	0.661836	0.172932	0.566667	0.125	-0.0714286	0.534884	-0.533333		-0.2
																		0.980769	0.72973	0.962264	0.878613	0.767442	0.39645	-0.533569	0.5	-0.962963	0.961905	0.288136	0.533333	0.647059	-0.644444	-0.571429	0.826087	0.602837	0.714286	-0.135135	0.413174	-0.707317	0	-0.913044	0.661836	0.172932	0.566667	0.125	-0.0714286	0.534884	-0.533333		-0.2
																		0.980769	0.72973	0.962264	0.878613	0.767442	0.39645	-0.530864	0.5	-0.962963	0.961905	0.288136	0.533333	0.647059	-0.644444	-0.571429	0.826087	0.602837	0.714286	-0.135135	0.413174	-0.707317	0	-0.913044	0.661836	0.172932	0.566667	0.125	-0.0714286	0.534884	-0.533333		-0.2
																		0.980769	0.72973	0.962264	0.878613	0.767442	0.39645	-0.528169	0.5	-0.962963	0.961905	0.288136	0.533333	0.647059	-0.644444	-0.571429	0.826087	0.602837	0.714286	-0.135135	0.413174	-0.707317	0	-0.913044	0.661836	0.172932	0.566667	0.125	-0.0714286	0.534884	-0.533333		-0.2
																		0.980769	0.72973	0.962264	0.878613	0.767442	0.39645	-0.525483	0.5	-0.962963	0.961905	0.288136	0.533333	0.647059	-0.644444	-0.571429	0.826087	0.602837	0.714286	-0.135135	0.413174	-0.707317	0	-0.913044	0.661836	0.172932	0.566667	0.125	-0.0714286	0.534884	-0.533333		-0.2
																		0.980769	0.72973	0.962264	0.878613	0.767442	0.39645	-0.517482	0.5	-0.962963	0.961905	0.288136	0.533333	0.647059	-0.644444	-0.571429	0.826087	0.602837	0.714286	-0.135135	0.413174	-0.707317	0	-0.913044	0.661836	0.172932	0.566667	0.125	-0.0714286	0.534884	-0.533333		-0.2
																		0.980769	0.72973	0.962264	0.878613	0.767442	0.39645	-0.512195	0.5	-0.962963	0.961905	0.288136	0.533333	0.647059	-0.644444	-0.571429	0.826087	0.602837	0.714286	-0.135135	0.413174	-0.707317	0	-0.913044	0.661836	0.172932	0.566667	0.125	-0.0714286	0.534884	-0.533333		-0.2
																		0.980769	0.72973	0.962264	0.878613	0.767442	0.39645	-0.506944	0.5	-0.962963	0.961905	0.288136	0.533333	0.647059	-0.644444	-0.571429	0.826087	0.602837	0.714286	-0.135135	0.413174	-0.707317	0	-0.913044	0.661836	0.172932	0.566667	0.125	-0.0714286	0.534884	-0.533333		-0.2
																		0.980769	0.72973	0.962264	0.878613	0.767442	0.39645	-0.504333	0.5	-0.962963	0.961905	0.288136	0.533333	0.647059	-0.644444	-0.571429	0.826087	0.602837	0.714286	-0.135135	0.413174	-0.707317	0	-0.913044	0.661836	0.172932	0.566667	0.125	-0.0714286	0.534884	-0.533333		-0.2
																		0.980769	0.72973	0.962264	0.878613	0.767442	0.39645	-0.50173	0.5	-0.962963	0.961905	0.288136	0.533333	0.647059	-0.644444	-0.571429	0.826087	0.602837	0.714286	-0.135135	0.413174	-0.707317	0	-0.913044	0.661836	0.172932	0.566667	0.125	-0.0714286	0.534884	-0.533333		-0.2
																		0.980769	0.72973	0.962264	0.878613	0.767442	0.39645	-0.499136	0.5	-0.962963	0.961905	0.288136	0.533333	0.647059	-0.644444	-0.571429	0.826087	0.602837	0.714286	-0.135135	0.413174	-0.707317	0	-0.913044	0.661836	0.172932	0.566667	0.125	-0.0714286	0.534884	-0.533333		-0.2
																		0.980769	0.72973	0.962264	0.878613	0.767442	0.39645	-0.499136	0.5	-0.962963	0.961905	0.288136	0.533333	0.647059	-0.644444	-0.571429	0.826087	0.602837	0.714286	-0.135135	0.413174	-0.707317	0	-0.913044	0.661836	0.164179	0.566667	0.125	-0.0714286	0.534884	-0.533333		-0.2
																		0.980769	0.72973	0.962264	0.878613	0.767442	0.39645	-0.493976	0.5	-0.962963	0.961905	0.288136	0.533333	0.647059	-0.644444	-0.571429	0.826087	0.602837	0.714286	-0.135135	0.413174	-0.707317	0	-0.913044	0.661836	0.164179	0.566667	0.125	-0.0714286	0.534884	-0.533333		-0.2
																		0.980769	0.72973	0.962264	0.878613	0.767442	0.39645	-0.493976	0.5	-0.962963	0.961905	0.288136	0.533333	0.647059	-0.644444	-0.571429	0.826087	0.602837	0.714286	-0.135135	0.413174	-0.707317	0	-0.913044	0.661836	0.164179	0.566667	0.125	-0.0714286	0.534884	-0.533333		-0.2
																		0.980769	0.72973	0.962264	0.878613	0.767442	0.39645	-0.493976	0.5	-0.962963	0.961905	0.288136	0.533333	0.647059	-0.644444	-0.571429	0.826087	0.602837	0.714286	-0.135135	0.413174	-0.707317	0	-0.913044	0.661836	0.164179	0.566667	0.125	-0.0714286	0.534884	-0.533333		-0.2
																		0.980769	0.72973	0.962264	0.878613	0.767442	0.39645	-0.491409	0.5	-0.962963	0.961905	0.288136	0.533333	0.647059	-0.644444	-0.571429	0.826087	0.602837	0.714286	-0.135135	0.413174	-0.707317	0	-0.913044	0.661836	0.164179	0.566667	0.125	-0.0714286	0.534884	-0.533333		-0.2
																		0.980769	0.72973	0.962264	0.878613	0.767442	0.39645	-0.488851	0.5	-0.962963	0.961905	0.288136	0.533333	0.647059	-0.644444	-0.571429	0.826087	0.602837	0.714286	-0.135135	0.413174	-0.707317	0	-0.913044	0.661836	0.164179	0.566667	0.125	-0.0714286	0.534884	-0.533333		-0.2
																		0.980769	0.72973	0.962264	0.878613	0.767442	0.39645	-0.488851	0.5	-0.962963	0.961905	0.297071	0.533333	0.647059	-0.644444	-0.571429	0.826087	0.602837	0.714286	-0.135135	0.413174	-0.707317	0	-0.913044	0.661836	0.164179	0.566667	0.125	-0.0714286	0.534884	-0.533333		-0.2
																		0.980769	0.72973	0.962264	0.878613	0.767442	0.39645	-0.483761	0.5	-0.962963	0.961905	0.311475	0.533333	0.647059	-0.644444	-0.571429	0.826087	0.602837	0.714286	-0.135135	0.413174	-0.707317	0	-0.913044	0.661836	0.164179	0.566667	0.125	-0.0714286	0.534884	-0.533333		-0.2
																		0.980769	0.72973	0.962264	0.878613	0.767442	0.39645	-0.473684	0.5	-0.962963	0.961905	0.314286	0.533333	0.647059	-0.644444	-0.571429	0.826087	0.602837	0.714286	-0.135135	0.413174	-0.707317	0	-0.913044	0.661836	0.164179	0.566667	0.125	-0.0714286	0.534884	-0.533333		-0.2
																		0.980769	0.72973	0.962264	0.878613	0.767442	0.39645	-0.466216	0.5	-0.962963	0.961905	0.328	0.533333	0.647059	-0.644444	-0.571429	0.826087	0.602837	0.714286	-0.135135	0.413174	-0.707317	0	-0.913044	0.615023	0.164179	0.566667	0.125	-0.0714286	0.534884	-0.533333		-0.2
																		0.980769	0.72973	0.962264	0.878613	0.767442	0.39645	-0.44426	0.5	-0.962963	0.961905	0.330677	0.533333	0.647059	-0.644444	-0.571429	0.826087	0.602837	0.714286	-0.135135	0.413174	-0.707317	0	-0.913044	0.615023	0.164179	0.566667	0.125	-0.0714286	0.534884	-0.533333		-0.2
																		0.980769	0.72973	0.962264	0.878613	0.767442	0.39645	-0.432343	0.5	-0.962963	0.961905	0.338583	0.533333	0.647059	-0.644444	-0.571429	0.826087	0.602837	0.714286	-0.135135	0.413174	-0.707317	0	-0.913044	0.615023	0.164179	0.566667	0.125	-0.0714286	0.534884	-0.533333		-0.2
																		0.980769	0.72973	0.962264	0.878613	0.767442	0.39645	-0.420622	0.5	-0.962963	0.961905	0.338583	0.533333	0.647059	-0.644444	-0.571429	0.826087	0.602837	0.714286	-0.135135	0.413174	-0.707317	0	-0.913044	0.615023	0.164179	0.566667	0.125	-0.0714286	0.534884	-0.533333		-0.2
																		0.980769	0.72973	0.962264	0.878613	0.767442	0.39645	-0.418301	0.5	-0.962963	0.961905	0.341176	0.533333	0.647059	-0.644444	-0.571429	0.826087	0.602837	0.714286	-0.135135	0.413174	-0.707317	0	-0.913044	0.615023	0.155556	0.566667	0.125	-0.0714286	0.534884	-0.533333		-0.2
																		0.980769	0.72973	0.962264	0.878613	0.767442	0.39645	-0.418301	0.5	-0.962963	0.961905	0.341176	0.533333	0.647059	-0.644444	-0.571429	0.826087	0.602837	0.714286	-0.135135	0.413174	-0.707317	0	-0.913044	0.615023	0.155556	0.566667	0.125	-0.0714286	0.534884	-0.533333		-0.2
																		0.980769	0.72973	0.962264	0.878613	0.767442	0.39645	-0.409091	0.5	-0.962963	0.961905	0.346303	0.533333	0.647059	-0.652174	-0.571429	0.826087	0.602837	0.714286	-0.135135	0.413174	-0.707317	0	-0.913044	0.615023	0.155556	0.566667	0.125	-0.0714286	0.534884	-0.533333		-0.2
																		0.980769	0.72973	0.962264	0.878613	0.767442	0.39645	-0.391026	0.5	-0.962963	0.961905	0.358779	0.533333	0.647059	-0.652174	-0.571429	0.826087	0.602837	0.714286	-0.135135	0.413174	-0.707317	0	-0.913044	0.615023	0.155556	0.566667	0.125	-0.0714286	0.534884	-0.533333		-0.2
																		0.980769	0.72973	0.962264	0.878613	0.767442	0.39645	-0.373418	0.5	-0.962963	0.961905	0.361217	0.533333	0.647059	-0.652174	-0.571429	0.826087	0.602837	0.714286	-0.135135	0.413174	-0.707317	0	-0.913044	0.615023	0.155556	0.566667	0.125	-0.0714286	0.534884	-0.533333		-0.2
																		0.980769	0.72973	0.962264	0.878613	0.767442	0.39645	-0.35625	0.5	-0.962963	0.961905	0.368421	0.533333	0.647059	-0.652174	-0.571429	0.826087	0.602837	0.714286	-0.135135	0.413174	-0.707317	0	-0.913044	0.615023	0.155556	0.566667	0.125	-0.0714286	0.534884	-0.533333		-0.2
																		0.980769	0.72973	0.962264	0.878613	0.767442	0.39645	-0.343653	0.5	-0.962963	0.961905	0.375465	0.533333	0.647059	-0.652174	-0.571429	0.826087	0.602837	0.714286	-0.135135	0.413174	-0.707317	0	-0.913044	0.615023	0.155556	0.566667	0.125	-0.0714286	0.534884	-0.4375		-0.2
																		0.980769	0.72973	0.962264	0.878613	0.767442	0.39645	-0.337442	0.5	-0.962963	0.961905	0.380074	0.533333	0.647059	-0.652174	-0.571429	0.826087	0.602837	0.714286	-0.135135	0.413174	-0.707317	0	-0.913044	0.615023	0.155556	0.566667	0.125	-0.0714286	0.534884	-0.4375		-0.2
																		0.980769	0.72973	0.962264	0.878613	0.767442	0.39645	-0.32925	0.5	-0.962963	0.961905	0.389091	0.533333	0.647059	-0.652174	-0.571429	0.826087	0.602837	0.714286	-0.135135	0.413174	-0.707317	0	-0.913044	0.615023	0.155556	0.566667	0.125	-0.0714286	0.534884	-0.4375		-0.2
																		0.980769	0.72973	0.962264	0.878613	0.767442	0.39645	-0.321157	0.5	-0.962963	0.961905	0.39785	0.533333	0.647059	-0.652174	-0.571429	0.826087	0.602837	0.714286	-0.135135	0.413174	-0.707317	0	-0.913044	0.615023	0.155556	0.566667	0.125	-0.0714286	0.534884	-0.4375		-0.2
																		0.980769	0.72973	0.962264	0.878613	0.767442	0.39645	-0.311178	0.5	-0.962963	0.961905	0.39785	0.533333	0.647059	-0.652174	-0.571429	0.826087	0.602837	0.714286	-0.135135	0.413174	-0.707317	0	-0.913044	0.615023	0.155556	0.566667	0.125	-0.0714286	0.534884	-0.4375		-0.2
																		0.980769	0.72973	0.962264	0.878613	0.767442	0.39645	-0.299401	0.5	-0.962963	0.961905	0.40636	0.533333	0.647059	-0.652174	-0.571429	0.826087	0.602837	0.714286	-0.135135	0.413174	-0.707317	0	-0.913044	0.615023	0.155556	0.566667	0.125	-0.0714286	0.534884	-0.4375		-0.2
																		0.980769	0.72973	0.962264	0.878613	0.767442	0.39645	-0.293592	0.5	-0.962963	0.961905	0.412587	0.533333	0.647059	-0.652174	-0.571429	0.826087	0.602837	0.714286	-0.135135	0.413174	-0.707317	0	-0.913044	0.615023	0.155556	0.566667	0.125	-0.0714286	0.534884	-0.4375		-0.2
																		0.980769	0.72973	0.962264	0.878613	0.767442	0.39645	-0.291667	0.5	-0.962963	0.961905	0.414634	0.533333	0.647059	-0.652174	-0.571429	0.826087	0.602837	0.714286	-0.135135	0.413174	-0.707317	0	-0.913044	0.615023	0.155556	0.566667	0.125	-0.0714286	0.534884	-0.4375		-0.2
																		0.980769	0.72973	0.962264	0.878613	0.767442	0.39645	-0.291667	0.5	-0.962963	0.961905	0.416667	0.533333	0.647059	-0.652174	-0.571429	0.826087	0.602837	0.714286	-0.135135	0.413174	-0.707317	0	-0.913044	0.615023	0.155556	0.566667	0.125	-0.0714286	0.534884	-0.4375		-0.2
																		0.980769	0.72973	0.962264	0.878613	0.767442	0.39645	-0.291667	0.5	-0.962963	0.961905	0.418685	0.533333	0.647059	-0.652174	-0.571429	0.826087	0.602837	0.714286	-0.135135	0.413174	-0.707317	0	-0.913044	0.615023	0.155556	0.566667	0.125	-0.0714286	0.534884	-0.4375		-0.2
																		0.980769	0.72973	0.962264	0.878613	0.767442	0.39645	-0.287834	0.5	-0.962963	0.961905	0.42069	0.533333	0.647059	-0.652174	-0.571429	0.826087	0.602837	0.714286	-0.135135	0.413174	-0.707317	0	-0.913044	0.615023	0.155556	0.566667	0.125	-0.0714286	0.534884	-0.4375		-0.2
																		0.980769	0.72973	0.962264	0.878613	0.767442	0.39645	-0.284024	0.5	-0.962963	0.961905	0.42069	0.533333	0.647059	-0.652174	-0.571429	0.826087	0.602837	0.714286	-0.135135	0.413174	-0.707317	0	-0.913044	0.615023	0.155556	0.566667	0.125	-0.0714286	0.534884	-0.4375		-0.2
																		0.980769	0.72973	0.962264	0.878613	0.767442	0.39645	-0.284024	0.5	-0.962963	0.961905	0.42268	0.533333	0.647059	-0.652174	-0.571429	0.826087	0.602837	0.714286	-0.135135	0.423529	-0.707317	0	-0.913044	0.615023	0.155556	0.566667	0.125	-0.0714286	0.534884	-0.4375		-0.2
																		0.980769	0.72973	0.962264	0.878613	0.767442	0.39645	-0.282127	0.5	-0.962963	0.961905	0.428571	0.533333	0.647059	-0.652174	-0.571429	0.826087	0.602837	0.714286	-0.135135	0.430233	-0.707317	0	-0.913044	0.615023	0.155556	0.566667	0.125	-0.0714286	0.534884	-0.4375		-0.2
																		0.980769	0.72973	0.962264	0.878613	0.767442	0.39645	-0.274596	0.5	-0.962963	0.961905	0.428571	0.533333	0.647059	-0.652174	-0.571429	0.826087	0.602837	0.714286	-0.135135	0.449438	-0.707317	0	-0.913044	0.615023	0.155556	0.566667	0.125	-0.0714286	0.534884	-0.4375		-0.2
																		0.980769	0.72973	0.962264	0.878613	0.767442	0.39645	-0.263464	0.5	-0.962963	0.961905	0.44186	0.533333	0.647059	-0.652174	-0.571429	0.826087	0.602837	0.714286	-0.135135	0.452514	-0.707317	0	-0.913044	0.615023	0.155556	0.566667	0.125	-0.0714286	0.534884	-0.4375		-0.2
																		0.980769	0.72973	0.962264	0.878613	0.767442	0.39645	-0.254335	0.5	-0.962963	0.961905	0.44186	0.533333	0.647059	-0.652174	-0.571429	0.826087	0.602837	0.714286	-0.135135	0.452514	-0.707317	0	-0.913044	0.615023	0.155556	0.566667	0.125	-0.0714286	0.534884	-0.4375		-0.2
																		0.980769	0.72973	0.962264	0.878613	0.767442	0.39645	-0.247126	0.5	-0.962963	0.961905	0.44186	0.533333	0.647059	-0.652174	-0.571429	0.826087	0.602837	0.714286	-0.135135	0.452514	-0.707317	0	-0.913044	0.615023	0.155556	0.566667	0.125	-0.0714286	0.534884	-0.4375		-0.2
																		0.980769	0.72973	0.962264	0.878613	0.767442	0.39645	-0.234708	0.5	-0.962963	0.961905	0.44186	0.533333	0.647059	-0.652174	-0.571429	0.826087	0.602837	0.714286	-0.135135	0.452514	-0.707317	0	-0.913044	0.615023	0.155556	0.566667	0.125	-0.0714286	0.534884	-0.4375		-0.2
																		0.980769	0.72973	0.962264	0.878613	0.767442	0.39645	-0.222535	0.5	-0.962963	0.961905	0.44186	0.533333	0.647059	-0.652174	-0.571429	0.826087	0.602837	0.714286	-0.135135	0.452514	-0.707317	0	-0.913044	0.615023	0.155556	0.566667	0.125	-0.0714286	0.534884	-0.4375		-0.2
																		0.980769	0.72973	0.962264	0.878613	0.767442	0.39645	-0.222535	0.5	-0.962963	0.961905	0.44186	0.533333	0.647059	-0.652174	-0.571429	0.826087	0.602837	0.714286	-0.135135	0.452514	-0.707317	0	-0.913044	0.615023	0.155556	0.566667	0.125	-0.0714286	0.534884	-0.4375		-0.2
																		0.980769	0.72973	0.962264	0.878613	0.767442	0.39645	-0.222535	0.5	-0.962963	0.961905	0.44186	0.533333	0.647059	-0.652174	-0.571429	0.826087	0.602837	0.714286	-0.135135	0.452514	-0.707317	0	-0.913044	0.615023	0.155556	0.566667	0.125	-0.0714286	0.534884	-0.4375		-0.2
																		0.980769	0.72973	0.962264	0.878613	0.767442	0.39645	-0.222535	0.5	-0.962963	0.961905	0.44186	0.533333	0.647059	-0.652174	-0.571429	0.826087	0.602837	0.714286	-0.135135	0.452514	-0.707317	0	-0.913044	0.615023	0.155556	0.566667	0.125	-0.0714286	0.534884	-0.4375		-0.2
																		0.980769	0.72973	0.962264	0.878613	0.767442	0.39645	-0.222535	0.5	-0.962963	0.961905	0.44186	0.533333	0.647059	-0.652174	-0.571429	0.826087	0.602837	0.714286	-0.135135	0.452514	-0.707317	0	-0.913044	0.615023	0.155556	0.566667	0.125	-0.0714286	0.534884	-0.4375		-0.2
																		0.980769	0.72973	0.962264	0.878613	0.767442	0.39645	-0.222535	0.5	-0.962963	0.961905	0.443709	0.533333	0.647059	-0.652174	-0.571429	0.826087	0.602837	0.714286	-0.135135	0.452514	-0.707317	0	-0.913044	0.615023	0.155556	0.566667	0.125	-0.0714286	0.534884	-0.4375		-0.2
																		0.980769	0.72973	0.962264	0.878613	0.767442	0.39645	-0.222535	0.5	-0.962963	0.961905	0.443709	0.533333	0.647059	-0.652174	-0.571429	0.826087	0.602837	0.714286	-0.135135	0.452514	-0.707317	0	-0.913044	0.615023	0.155556	0.566667	0.125	-0.0714286	0.534884	-0.4375		-0.2
																		0.980769	0.72973	0.962264	0.878613	0.767442	0.39645	-0.222535	0.5	-0.962963	0.961905	0.443709	0.533333	0.647059	-0.652174	-0.571429	0.826087	0.602837	0.714286	-0.135135	0.452514	-0.707317	0	-0.913044	0.615023	0.155556	0.566667	0.125	-0.0714286	0.534884	-0.4375		-0.2
																		0.980769	0.72973	0.962264	0.878613	0.767442	0.39645	-0.222535	0.5	-0.962963	0.961905	0.443709	0.533333	0.647059	-0.652174	-0.571429	0.826087	0.602837	0.714286	-0.135135	0.452514	-0.707317	0	-0.913044	0.615023	0.155556	0.566667	0.125	-0.0714286	0.534884	-0.4375		-0.2
																		0.980769	0.72973	0.962264	0.878613	0.767442	0.39645	-0.222535	0.5	-0.962963	0.961905	0.443709	0.533333	0.647059	-0.652174	-0.571429	0.826087	0.602837	0.714286	-0.135135	0.452514	-0.707317	0	-0.913044	0.615023	0.155556	0.566667	0.125	-0.0714286	0.534884	-0.4375		-0.2
																		0.980769	0.72973	0.962264	0.878613	0.767442	0.39645	-0.222535	0.5	-0.962963	0.961905	0.443709	0.533333	0.647059	-0.652174	-0.571429	0.826087	0.602837	0.714286	-0.135135	0.452514	-0.707317	0	-0.913044	0.615023	0.155556	0.566667	0.125	-0.0714286	0.534884	-0.4375		-0.2
																		0.980769	0.72973	0.962264	0.878613	0.767442	0.39645	-0.222535	0.5	-0.962963	0.961905	0.443709	0.533333	0.647059	-0.652174	-0.571429	0.826087	0.602837	0.714286	-0.135135	0.452514	-0.707317	0	-0.913044	0.615023	0.155556	0.566667	0.125	-0.0714286	0.534884	-0.4375		-0.2
																		0.980769	0.72973	0.962264	0.878613	0.767442	0.39645	-0.222535	0.5	-0.962963	0.961905	0.443709	0.533333	0.647059	-0.652174	-0.571429	0.826087	0.602837	0.714286	-0.135135	0.452514	-0.707317	0	-0.913044	0.615023	0.155556	0.566667	0.125	-0.0714286	0.534884	-0.4375		-0.2
																		0.980769	0.72973	0.962264	0.878613	0.767442	0.39645	-0.222535	0.5	-0.962963	0.961905	0.443709	0.533333	0.647059	-0.652174	-0.571429	0.826087	0.602837	0.714286	-0.135135	0.420765	-0.707317	0	-0.913044	0.615023	0.155556	0.566667	0.125	-0.0714286	0.534884	-0.4375		-0.2
																		0.980769	0.72973	0.962264	0.878613	0.767442	0.39645	-0.222535	0.5	-0.962963	0.961905	0.443709	0.533333	0.647059	-0.652174	-0.571429	0.826087	0.602837	0.714286	-0.135135	0.405405	-0.707317	0	-0.913044	0.615023	0.155556	0.566667	0.125	-0.0714286	0.534884	-0.4375		-0.2
																		0.980769	0.72973	0.962264	0.878613	0.767442	0.39645	-0.222535	0.5	-0.962963	0.961905	0.443709	0.533333	0.647059	-0.652174	-0.571429	0.826087	0.602837	0.714286	-0.135135	0.405405	-0.707317	0	-0.913044	0.615023	0.155556	0.566667	0.125	-0.0714286	0.534884	-0.4375		-0.2
																		0.980769	0.72973	0.962264	0.878613	0.767442	0.39645	-0.222535	0.5	-0.962963	0.961905	0.443709	0.533333	0.647059	-0.652174	-0.571429	0.826087	0.602837	0.714286	-0.135135	0.405405	-0.707317	0	-0.913044	0.615023	0.155556	0.566667	0.125	-0.0714286	0.534884	-0.4375		-0.2
																		0.980769	0.72973	0.962264	0.873199	0.767442	0.39645	-0.222535	0.5	-0.962963	0.961905	0.443709	0.533333	0.647059	-0.652174	-0.571429	0.826087	0.602837	0.714286	-0.135135	0.405405	-0.707317	0	-0.913044	0.615023	0.147059	0.566667	0.125	-0.0714286	0.534884	-0.4375		-0.2
																		0.980769	0.72973	0.962264	0.873199	0.767442	0.39645	-0.222535	0.5	-0.962963	0.961905	0.443709	0.533333	0.647059	-0.652174	-0.571429	0.826087	0.602837	0.714286	-0.135135	0.405405	-0.707317	0	-0.913044	0.615023	0.147059	0.566667	0.125	-0.0714286	0.534884	-0.4375		-0.2
																		0.980769	0.72973	0.962264	0.873199	0.767442	0.39645	-0.222535	0.5	-0.962963	0.961905	0.443709	0.533333	0.647059	-0.652174	-0.571429	0.826087	0.602837	0.714286	-0.135135	0.405405	-0.707317	0	-0.913044	0.615023	0.147059	0.566667	0.125	-0.0714286	0.534884	-0.4375		-0.2
																		0.980769	0.72973	0.962264	0.873199	0.767442	0.39645	-0.222535	0.5	-0.962963	0.961905	0.443709	0.533333	0.647059	-0.652174	-0.571429	0.826087	0.602837	0.714286	-0.135135	0.405405	-0.707317	0	-0.913044	0.615023	0.147059	0.566667	0.125	-0.0714286	0.534884	-0.4375		-0.2
																		0.980769	0.72973	0.962264	0.873199	0.767442	0.39645	-0.222535	0.5	-0.962963	0.961905	0.443709	0.533333	0.647059	-0.652174	-0.571429	0.826087	0.602837	0.714286	-0.135135	0.405405	-0.707317	0	-0.913044	0.615023	0.147059	0.566667	0.125	-0.0714286	0.534884	-0.4375		-0.2
																		0.980769	0.72973	0.962264	0.873199	0.767442	0.39645	-0.222535	0.5	-0.962963	0.961905	0.443709	0.533333	0.647059	-0.652174	-0.571429	0.833333	0.602837	0.714286	-0.135135	0.405405	-0.707317	0	-0.913044	0.615023	0.147059	0.566667	0.125	-0.0714286	0.534884	-0.4375		-0.2
																		0.980769	0.72973	0.962264	0.873199	0.767442	0.39645	-0.222535	0.5	-0.962963	0.961905	0.443709	0.533333	0.647059	-0.652174	-0.571429	0.848101	0.602837	0.714286	-0.135135	0.405405	-0.707317	0	-0.913044	0.615023	0.147059	0.566667	0.125	-0.0714286	0.534884	-0.4375		-0.2
																		0.980769	0.72973	0.962264	0.873199	0.767442	0.39645	-0.222535	0.5	-0.962963	0.961905	0.443709	0.533333	0.647059	-0.652174	-0.571429	0.848101	0.602837	0.714286	-0.135135	0.405405	-0.707317	0	-0.913044	0.615023	0.147059	0.566667	0.125	-0.0714286	0.534884	-0.4375		-0.2
																		0.980769	0.72973	0.962264	0.873199	0.767442	0.39645	-0.222535	0.5	-0.962963	0.961905	0.443709	0.533333	0.647059	-0.652174	-0.571429	0.85	0.602837	0.714286	-0.135135	0.405405	-0.707317	0	-0.913044	0.615023	0.147059	0.566667	0.125	-0.0714286	0.534884	-0.4375		-0.2
																		0.980769	0.72973	0.962264	0.873199	0.767442	0.39645	-0.222535	0.5	-0.962963	0.961905	0.443709	0.533333	0.647059	-0.652174	-0.571429	0.85	0.602837	0.714286	-0.135135	0.405405	-0.707317	0	-0.913044	0.615023	0.147059	0.566667	0.125	-0.0714286	0.534884	-0.4375		-0.2
																		0.980769	0.72973	0.962264	0.873199	0.767442	0.39645	-0.222535	0.5	-0.962963	0.961905	0.443709	0.533333	0.647059	-0.652174	-0.571429	0.85	0.602837	0.714286	-0.135135	0.405405	-0.707317	0	-0.913044	0.615023	0.147059	0.566667	0.125	-0.0714286	0.534884	-0.4375		-0.2
																		0.980769	0.72973	0.962264	0.873199	0.767442	0.39645	-0.222535	0.5	-0.962963	0.961905	0.443709	0.533333	0.647059	-0.652174	-0.571429	0.85	0.602837	0.714286	-0.135135	0.405405	-0.707317	0	-0.913044	0.615023	0.147059	0.566667	0.125	-0.0714286	0.534884	-0.4375		-0.2
																		0.980769	0.72973	0.962264	0.873199	0.767442	0.39645	-0.222535	0.5	-0.962963	0.961905	0.443709	0.533333	0.647059	-0.652174	-0.571429	0.85	0.602837	0.714286	-0.135135	0.405405	-0.707317	0	-0.913044	0.615023	0.147059	0.566667	0.125	-0.0714286	0.534884	-0.4375		-0.2
																		0.980769	0.72973	0.962264	0.873199	0.767442	0.39645	-0.222535	0.5	-0.962963	0.961905	0.443709	0.533333	0.647059	-0.652174	-0.571429	0.85	0.591549	0.714286	-0.135135	0.405405	-0.707317	0	-0.913044	0.615023	0.147059	0.566667	0.125	-0.0714286	0.534884	-0.4375		-0.2
																		0.980769	0.72973	0.962264	0.873199	0.767442	0.39645	-0.222535	0.5	-0.962963	0.961905	0.443709	0.533333	0.647059	-0.652174	-0.571429	0.85	0.591549	0.714286	-0.135135	0.405405	-0.707317	0	-0.913044	0.615023	0.147059	0.566667	0.125	-0.0714286	0.534884	-0.4375		-0.2
																		0.980769	0.72973	0.962264	0.873199	0.767442	0.39645	-0.222535	0.5	-0.962963	0.961905	0.443709	0.533333	0.647059	-0.652174	-0.571429	0.85	0.591549	0.714286	-0.135135	0.405405	-0.707317	0	-0.913044	0.615023	0.147059	0.566667	0.125	-0.0714286	0.534884	-0.4375		-0.2
																		0.980769	0.72973	0.962264	0.873199	0.767442	0.39645	-0.222535	0.5	-0.962963	0.961905	0.443709	0.533333	0.647059	-0.652174	-0.571429	0.85	0.58042	0.714286	-0.135135	0.405405	-0.707317	0	-0.913044	0.615023	0.147059	0.566667	0.125	-0.0714286	0.534884	-0.4375		-0.2
																		0.980769	0.72973	0.962264	0.873199	0.767442	0.39645	-0.219101	0.5	-0.962963	0.961905	0.443709	0.533333	0.647059	-0.652174	-0.571429	0.85	0.58042	0.714286	-0.135135	0.405405	-0.707317	0	-0.913044	0.615023	0.147059	0.566667	0.125	-0.0714286	0.534884	-0.4375		-0.2
																		0.980769	0.72973	0.962264	0.873199	0.769231	0.39645	-0.208914	0.5	-0.962963	0.961905	0.443709	0.533333	0.647059	-0.652174	-0.571429	0.85	0.58042	0.714286	-0.135135	0.405405	-0.707317	0	-0.913044	0.615023	0.147059	0.566667	0.125	-0.0714286	0.534884	-0.4375		-0.2
																		0.981308	0.72973	0.962264	0.873199	0.769231	0.39645	-0.195592	0.5	-0.962963	0.961905	0.443709	0.533333	0.647059	-0.652174	-0.571429	0.85	0.58042	0.714286	-0.135135	0.405405	-0.707317	0	-0.913044	0.615023	0.147059	0.566667	0.125	-0.0714286	0.534884	-0.4375		-0.2
																		0.981482	0.72973	0.962264	0.873199	0.769231	0.39645	-0.193948	0.5	-0.962963	0.961905	0.443709	0.533333	0.647059	-0.652174	-0.571429	0.85	0.58042	0.714286	-0.135135	0.405405	-0.707317	0	-0.913044	0.615023	0.147059	0.566667	0.125	-0.0714286	0.534884	-0.4375		-0.2
																		0.981482	0.72973	0.962264	0.873199	0.769231	0.39645	-0.192308	0.5	-0.962963	0.961905	0.443709	0.533333	0.647059	-0.652174	-0.571429	0.85	0.58042	0.714286	-0.135135	0.405405	-0.707317	0	-0.913044	0.615023	0.147059	0.566667	0.125	-0.0714286	0.534884	-0.4375		-0.2
																		0.981482	0.72973	0.962264	0.873199	0.769231	0.39645	-0.192308	0.5	-0.962963	0.961905	0.443709	0.533333	0.647059	-0.652174	-0.571429	0.85	0.58042	0.714286	-0.135135	0.405405	-0.707317	0	-0.913044	0.615023	0.147059	0.566667	0.125	-0.0714286	0.534884	-0.4375		-0.2
																		0.981482	0.72973	0.962264	0.873199	0.769231	0.39645	-0.192308	0.5	-0.962963	0.961905	0.443709	0.533333	0.647059	-0.652174	-0.571429	0.85	0.58042	0.714286	-0.135135	0.405405	-0.707317	0	-0.913044	0.615023	0.147059	0.566667	0.125	-0.084507	0.534884	-0.4375		-0.2
																		0.981482	0.72973	0.962264	0.873199	0.769231	0.39645	-0.192308	0.5	-0.962963	0.961905	0.443709	0.533333	0.647059	-0.652174	-0.571429	0.85	0.58042	0.714286	-0.135135	0.405405	-0.707317	0	-0.913044	0.615023	0.147059	0.566667	0.125	-0.0909091	0.534884	-0.4375		-0.2
																		0.981482	0.72973	0.962264	0.873199	0.769231	0.39645	-0.192308	0.5	-0.962963	0.961905	0.443709	0.533333	0.647059	-0.652174	-0.571429	0.85	0.58042	0.714286	-0.135135	0.405405	-0.707317	0	-0.913044	0.615023	0.147059	0.566667	0.125	-0.0909091	0.534884	-0.4375		-0.2
																		0.981482	0.72973	0.962264	0.873199	0.769231	0.39645	-0.192308	0.5	-0.962963	0.961905	0.443709	0.533333	0.647059	-0.652174	-0.571429	0.85	0.58042	0.714286	-0.135135	0.405405	-0.707317	0	-0.913044	0.615023	0.147059	0.566667	0.125	-0.0909091	0.534884	-0.4375		-0.2
																		0.981482	0.72973	0.962264	0.873199	0.769231	0.39645	-0.192308	0.5	-0.962963	0.961905	0.443709	0.533333	0.647059	-0.652174	-0.571429	0.85	0.58042	0.714286	-0.135135	0.405405	-0.707317	0	-0.913044	0.615023	0.147059	0.566667	0.125	-0.0909091	0.534884	-0.4375		-0.2
																		0.981482	0.72973	0.962264	0.873199	0.769231	0.39645	-0.192308	0.5	-0.962963	0.961905	0.443709	0.533333	0.647059	-0.652174	-0.571429	0.85	0.58042	0.714286	-0.135135	0.405405	-0.707317	0	-0.913044	0.615023	0.147059	0.566667	0.125	-0.0909091	0.534884	-0.4375		-0.2
																		0.981482	0.72973	0.962264	0.873199	0.769231	0.39645	-0.192308	0.5	-0.962963	0.961905	0.443709	0.533333	0.647059	-0.652174	-0.571429	0.85	0.58042	0.714286	-0.135135	0.405405	-0.707317	0	-0.913044	0.615023	0.147059	0.566667	0.125	-0.0909091	0.534884	-0.4375		-0.2
																		0.981482	0.72973	0.962264	0.873199	0.769231	0.39645	-0.192308	0.5	-0.962963	0.961905	0.443709	0.533333	0.647059	-0.652174	-0.571429	0.85	0.58042	0.714286	-0.135135	0.405405	-0.707317	-0.5	-0.913044	0.615023	0.147059	0.566667	0.125	-0.0909091	0.534884	-0.4375		-0.2
																		0.981482	0.72973	0.962264	0.873199	0.769231	0.39645	-0.192308	0.5	-0.962963	0.961905	0.447368	0.533333	0.647059	-0.652174	-0.571429	0.85	0.58042	0.714286	-0.135135	0.405405	-0.707317	-0.5	-0.913044	0.615023	0.147059	0.566667	0.125	-0.0909091	0.534884	-0.4375		-0.2
																		0.981482	0.72973	0.962264	0.873199	0.769231	0.39645	-0.192308	0.5	-0.962963	0.961905	0.456311	0.533333	0.647059	-0.652174	-0.571429	0.851852	0.58042	0.714286	-0.135135	0.405405	-0.707317	-0.666667	-0.913044	0.615023	0.147059	0.566667	0.125	-0.0909091	0.534884	-0.4375		-0.2
																		0.981482	0.72973	0.962264	0.873199	0.769231	0.39645	-0.192308	0.5	-0.962963	0.961905	0.458064	0.533333	0.647059	-0.652174	-0.571429	0.853659	0.58042	0.714286	-0.135135	0.405405	-0.707317	-0.714286	-0.913044	0.615023	0.147059	0.566667	0.125	-0.0909091	0.534884	-0.4375		-0.2
																		0.981482	0.72973	0.962264	0.873199	0.769231	0.39645	-0.192308	0.487179	-0.962963	0.961905	0.461539	0.533333	0.647059	-0.652174	-0.571429	0.853659	0.58042	0.714286	-0.135135	0.405405	-0.707317	-0.777778	-0.913044	0.615023	0.147059	0.566667	0.125	-0.0909091	0.534884	-0.4375		-0.2
																		0.981482	0.72973	0.962264	0.873199	0.769231	0.39645	-0.192308	0.487179	-0.962963	0.961905	0.466667	0.533333	0.647059	-0.652174	-0.586207	0.853659	0.58042	0.714286	-0.135135	0.405405	-0.707317	-0.857143	-0.913044	0.615023	0.147059	0.566667	0.125	-0.0909091	0.534884	-0.4375		-0.2
																		0.981482	0.72973	0.962264	0.873199	0.769231	0.39645	-0.192308	0.487179	-0.962963	0.961905	0.466667	0.533333	0.647059	-0.652174	-0.586207	0.853659	0.58042	0.714286	-0.135135	0.405405	-0.707317	-0.9	-0.913044	0.615023	0.147059	0.566667	0.125	-0.0909091	0.534884	-0.4375		-0.2
																		0.981482	0.72973	0.962264	0.873199	0.769231	0.39645	-0.192308	0.487179	-0.962963	0.961905	0.466667	0.533333	0.647059	-0.652174	-0.586207	0.853659	0.547945	0.714286	-0.135135	0.405405	-0.707317	-0.9	-0.913044	0.615023	0.147059	0.566667	0.125	-0.0909091	0.534884	-0.4375		-0.2
																		0.981482	0.72973	0.962264	0.873199	0.769231	0.39645	-0.192308	0.487179	-0.962963	0.961905	0.466667	0.533333	0.647059	-0.652174	-0.586207	0.853659	0.537415	0.714286	-0.135135	0.405405	-0.707317	-0.9	-0.913044	0.615023	0.147059	0.566667	0.125	-0.0909091	0.534884	-0.4375		-0.2
																		0.981482	0.72973	0.962264	0.873199	0.769231	0.39645	-0.192308	0.487179	-0.962963	0.961905	0.466667	0.533333	0.647059	-0.652174	-0.586207	0.853659	0.477124	0.714286	-0.135135	0.405405	-0.707317	-0.904762	-0.913044	0.615023	0.147059	0.566667	0.125	-0.0909091	0.534884	-0.4375		-0.2
																		0.981482	0.72973	0.962264	0.873199	0.769231	0.39645	-0.192308	0.487179	-0.962963	0.961905	0.468354	0.533333	0.647059	-0.652174	-0.586207	0.853659	0.458064	0.714286	-0.135135	0.405405	-0.707317	-0.904762	-0.913044	0.615023	0.147059	0.566667	0.125	-0.0909091	0.534884	-0.4375		-0.2
																		0.981482	0.72973	0.962264	0.873199	0.769231	0.39645	-0.192308	0.487179	-0.962963	0.961905	0.468354	0.533333	0.647059	-0.652174	-0.586207	0.853659	0.448718	0.714286	-0.135135	0.405405	-0.707317	-0.904762	-0.913044	0.615023	0.147059	0.566667	0.125	-0.0909091	0.534884	-0.4375		-0.2
																		0.981482	0.72973	0.962264	0.873199	0.769231	0.39645	-0.192308	0.487179	-0.962963	0.961905	0.471698	0.533333	0.647059	-0.652174	-0.586207	0.853659	0.43949	0.714286	-0.135135	0.405405	-0.707317	-0.904762	-0.913044	0.615023	0.147059	0.566667	0.125	-0.0909091	0.534884	-0.4375		-0.2
																		0.981482	0.72973	0.962264	0.873199	0.769231	0.39645	-0.192308	0.487179	-0.962963	0.961905	0.473354	0.533333	0.647059	-0.652174	-0.586207	0.853659	0.43949	0.714286	-0.135135	0.405405	-0.707317	-0.904762	-0.913044	0.615023	0.138686	0.566667	0.125	-0.0909091	0.534884	-0.4375		-0.2
																		0.981482	0.72973	0.962264	0.873199	0.769231	0.39645	-0.192308	0.487179	-0.962963	0.961905	0.481482	0.533333	0.647059	-0.659574	-0.586207	0.853659	0.43949	0.714286	-0.135135	0.405405	-0.707317	-0.904762	-0.913044	0.615023	0.138686	0.566667	0.125	-0.0909091	0.534884	-0.4375		-0.2
																		0.981482	0.72973	0.962264	0.873199	0.769231	0.39645	-0.192308	0.487179	-0.962963	0.961905	0.483077	0.575758	0.647059	-0.692308	-0.586207	0.853659	0.43949	0.714286	-0.135135	0.405405	-0.707317	-0.904762	-0.913044	0.615023	0.138686	0.566667	0.125	-0.0909091	0.534884	-0.4375		-0.2
																		0.981482	0.72973	0.962264	0.873199	0.769231	0.39645	-0.192308	0.487179	-0.962963	0.961905	0.489362	0.6	0.647059	-0.714286	-0.586207	0.853659	0.43949	0.714286	-0.135135	0.405405	-0.707317	-0.904762	-0.913044	0.615023	0.138686	0.566667	0.125	-0.0909091	0.534884	-0.4375		-0.2
																		0.981482	0.72973	0.962264	0.873199	0.769231	0.39645	-0.192308	0.487179	-0.962963	0.961905	0.490909	0.611111	0.647059	-0.724138	-0.586207	0.853659	0.43949	0.714286	-0.135135	0.405405	-0.707317	-0.904762	-0.913044	0.615023	0.138686	0.566667	0.125	-0.0909091	0.534884	-0.4375		-0.2
																		0.981482	0.72973	0.962264	0.873199	0.769231	0.39645	-0.192308	0.487179	-0.962963	0.961905	0.492447	0.631579	0.647059	-0.75	-0.586207	0.853659	0.43949	0.714286	-0.135135	0.405405	-0.707317	-0.904762	-0.913044	0.615023	0.130435	0.566667	0.125	-0.0909091	0.534884	-0.4375		-0.2
																		0.981482	0.72973	0.962264	0.873199	0.769231	0.39645	-0.192308	0.487179	-0.962963	0.961905	0.493976	0.631579	0.647059	-0.768116	-0.586207	0.853659	0.43949	0.714286	-0.135135	0.405405	-0.707317	-0.904762	-0.913044	0.615023	0.130435	0.566667	0.125	-0.0909091	0.534884	-0.4375		-0.2
																		0.981482	0.72973	0.962264	0.873199	0.769231	0.39645	-0.192308	0.487179	-0.962963	0.961905	0.5	0.65	0.647059	-0.768116	-0.586207	0.853659	0.43949	0.714286	-0.135135	0.405405	-0.707317	-0.904762	-0.913044	0.615023	0.130435	0.566667	0.125	-0.0909091	0.534884	-0.4375		-0.2
																		0.981482	0.72973	0.962264	0.873199	0.769231	0.39645	-0.192308	0.487179	-0.962963	0.961905	0.513043	0.674419	0.647059	-0.771429	-0.586207	0.853659	0.43949	0.714286	-0.135135	0.405405	-0.707317	-0.904762	-0.913044	0.615023	0.130435	0.566667	0.125	-0.0909091	0.534884	-0.4375		-0.2
																		0.981482	0.72973	0.962264	0.873199	0.769231	0.39645	-0.192308	0.487179	-0.962963	0.961905	0.513043	0.681818	0.647059	-0.771429	-0.586207	0.853659	0.43949	0.714286	-0.135135	0.405405	-0.707317	-0.904762	-0.913044	0.615023	0.130435	0.566667	0.125	-0.0909091	0.534884	-0.393939		-0.2
																		0.981482	0.72973	0.962264	0.873199	0.769231	0.39645	-0.192308	0.487179	-0.962963	0.961905	0.514451	0.688889	0.647059	-0.771429	-0.586207	0.853659	0.43949	0.714286	-0.135135	0.405405	-0.707317	-0.904762	-0.913044	0.615023	0.130435	0.566667	0.125	-0.0909091	0.534884	-0.393939		-0.2
																		0.981482	0.72973	0.962264	0.873199	0.769231	0.39645	-0.192308	0.487179	-0.962963	0.961905	0.514451	0.688889	0.647059	-0.777778	-0.586207	0.853659	0.43949	0.714286	-0.135135	0.405405	-0.707317	-0.904762	-0.913044	0.615023	0.130435	0.566667	0.125	-0.0909091	0.534884	-0.393939		-0.2
																		0.981482	0.72973	0.962264	0.873199	0.769231	0.39645	-0.192308	0.487179	-0.962963	0.961905	0.514451	0.688889	0.647059	-0.780822	-0.586207	0.853659	0.43949	0.714286	-0.135135	0.405405	-0.707317	-0.904762	-0.913044	0.615023	0.130435	0.566667	0.125	-0.0909091	0.534884	-0.393939		-0.2
																		0.981482	0.72973	0.962264	0.873199	0.769231	0.39645	-0.192308	0.487179	-0.962963	0.961905	0.514451	0.688889	0.647059	-0.780822	-0.586207	0.853659	0.43949	0.714286	-0.135135	0.405405	-0.707317	-0.904762	-0.913044	0.615023	0.130435	0.566667	0.125	-0.0909091	0.534884	-0.393939		-0.2
																		0.981482	0.72973	0.962264	0.873199	0.769231	0.39645	-0.192308	0.487179	-0.962963	0.961905	0.514451	0.695652	0.647059	-0.780822	-0.586207	0.853659	0.43949	0.714286	-0.135135	0.405405	-0.707317	-0.904762	-0.913044	0.615023	0.130435	0.566667	0.125	-0.0909091	0.534884	-0.393939		-0.2
																		0.981482	0.72973	0.962264	0.873199	0.769231	0.39645	-0.192308	0.487179	-0.962963	0.961905	0.514451	0.702128	0.647059	-0.780822	-0.586207	0.853659	0.43949	0.714286	-0.135135	0.405405	-0.707317	-0.904762	-0.913044	0.615023	0.130435	0.566667	0.125	-0.0909091	0.534884	-0.393939		-0.2
																		0.981482	0.72973	0.962264	0.873199	0.769231	0.39645	-0.192308	0.487179	-0.962963	0.961905	0.514451	0.708333	0.647059	-0.780822	-0.586207	0.853659	0.43949	0.714286	-0.135135	0.405405	-0.707317	-0.904762	-0.913044	0.615023	0.130435	0.566667	0.125	-0.0909091	0.534884	-0.393939		-0.2
																		0.981482	0.72973	0.962264	0.873199	0.769231	0.39645	-0.192308	0.487179	-0.962963	0.961905	0.514451	0.714286	0.647059	-0.780822	-0.586207	0.853659	0.43949	0.714286	-0.135135	0.405405	-0.707317	-0.904762	-0.913044	0.615023	0.130435	0.566667	0.125	-0.0909091	0.534884	-0.393939		-0.2
																		0.981482	0.72973	0.962264	0.873199	0.769231	0.39645	-0.192308	0.487179	-0.962963	0.961905	0.514451	0.72	0.647059	-0.780822	-0.586207	0.853659	0.43949	0.714286	-0.135135	0.405405	-0.707317	-0.904762	-0.913044	0.615023	0.130435	0.566667	0.125	-0.0909091	0.534884	-0.393939		-0.2
																		0.981482	0.72973	0.962264	0.873199	0.769231	0.39645	-0.192308	0.487179	-0.962963	0.961905	0.514451	0.72549	0.647059	-0.780822	-0.586207	0.853659	0.43949	0.714286	-0.135135	0.405405	-0.707317	-0.904762	-0.913044	0.615023	0.130435	0.566667	0.125	-0.0909091	0.534884	-0.393939		-0.2
																		0.981482	0.72973	0.962264	0.873199	0.769231	0.39645	-0.192308	0.487179	-0.962963	0.961905	0.514451	0.730769	0.647059	-0.780822	-0.586207	0.853659	0.43949	0.714286	-0.135135	0.405405	-0.707317	-0.904762	-0.913044	0.615023	0.130435	0.566667	0.125	-0.0909091	0.534884	-0.393939		-0.2
																		0.981482	0.72973	0.962264	0.873199	0.769231	0.39645	-0.192308	0.487179	-0.962963	0.961905	0.514451	0.770492	0.647059	-0.780822	-0.586207	0.853659	0.43949	0.714286	-0.135135	0.405405	-0.707317	-0.904762	-0.913044	0.615023	0.130435	0.566667	0.125	-0.0909091	0.534884	-0.393939		-0.2
																		0.981482	0.72973	0.962264	0.873199	0.769231	0.39645	-0.192308	0.487179	-0.962963	0.961905	0.514451	0.770492	0.647059	-0.780822	-0.586207	0.853659	0.43949	0.714286	-0.135135	0.405405	-0.707317	-0.904762	-0.913044	0.615023	0.130435	0.566667	0.125	-0.0909091	0.534884	-0.393939		-0.2
																		0.981482	0.72973	0.962264	0.873199	0.769231	0.39645	-0.192308	0.487179	-0.962963	0.961905	0.514451	0.774193	0.647059	-0.780822	-0.586207	0.853659	0.43949	0.714286	-0.135135	0.405405	-0.707317	-0.904762	-0.913044	0.615023	0.130435	0.566667	0.125	-0.0909091	0.534884	-0.393939		-0.2
																		0.981482	0.72973	0.962264	0.873199	0.769231	0.39645	-0.185792	0.487179	-0.962963	0.961905	0.514451	0.774193	0.647059	-0.780822	-0.586207	0.853659	0.43949	0.714286	-0.135135	0.405405	-0.707317	-0.904762	-0.913044	0.615023	0.130435	0.566667	0.125	-0.0909091	0.534884	-0.393939		-0.2
																		0.981482	0.72973	0.962264	0.873199	0.769231	0.39645	-0.185792	0.487179	-0.962963	0.961905	0.514451	0.774193	0.647059	-0.780822	-0.586207	0.853659	0.43949	0.714286	-0.135135	0.405405	-0.707317	-0.904762	-0.913044	0.615023	0.130435	0.566667	0.125	-0.0909091	0.534884	-0.393939		-0.2
																		0.981482	0.72973	0.962264	0.873199	0.769231	0.39645	-0.185792	0.487179	-0.962963	0.961905	0.518625	0.774193	0.647059	-0.780822	-0.586207	0.853659	0.43949	0.714286	-0.135135	0.405405	-0.707317	-0.904762	-0.913044	0.615023	0.130435	0.566667	0.125	-0.0909091	0.534884	-0.393939		-0.2
																		0.981482	0.72973	0.962264	0.873199	0.769231	0.39645	-0.185792	0.487179	-0.962963	0.961905	0.526761	0.774193	0.647059	-0.780822	-0.586207	0.853659	0.43949	0.714286	-0.135135	0.405405	-0.707317	-0.904762	-0.913044	0.615023	0.130435	0.566667	0.125	-0.0909091	0.534884	-0.393939		-0.2
																		0.981482	0.72973	0.962264	0.873199	0.769231	0.39645	-0.185792	0.487179	-0.962963	0.961905	0.53719	0.774193	0.647059	-0.780822	-0.586207	0.853659	0.43949	0.714286	-0.135135	0.405405	-0.707317	-0.904762	-0.913044	0.615023	0.114286	0.566667	0.125	-0.0909091	0.534884	-0.393939		-0.2
																		0.981482	0.72973	0.962264	0.873199	0.769231	0.39645	-0.185792	0.487179	-0.962963	0.961905	0.538462	0.774193	0.647059	-0.780822	-0.586207	0.853659	0.43949	0.714286	-0.135135	0.405405	-0.707317	-0.904762	-0.913044	0.615023	0.114286	0.566667	0.125	-0.0909091	0.534884	-0.393939		-0.2
																		0.981482	0.72973	0.962264	0.873199	0.769231	0.39645	-0.185792	0.487179	-0.962963	0.961905	0.538462	0.774193	0.647059	-0.780822	-0.636364	0.853659	0.43949	0.714286	-0.135135	0.405405	-0.707317	-0.904762	-0.913044	0.615023	0.106383	0.566667	0.125	-0.0909091	0.534884	-0.393939		-0.2
																		0.981482	0.72973	0.962264	0.851852	0.769231	0.39645	-0.185792	0.487179	-0.962963	0.961905	0.542234	0.774193	0.647059	-0.780822	-0.636364	0.853659	0.43949	0.714286	-0.135135	0.405405	-0.707317	-0.904762	-0.913044	0.615023	0.106383	0.566667	0.125	-0.0909091	0.534884	-0.393939		-0.2
																		0.981482	0.72973	0.962264	0.836158	0.769231	0.39645	-0.185792	0.487179	-0.962963	0.961905	0.54717	0.774193	0.647059	-0.780822	-0.636364	0.853659	0.43949	0.714286	-0.135135	0.405405	-0.707317	-0.904762	-0.913044	0.615023	0.0985916	0.566667	0.125	-0.0909091	0.534884	-0.393939		-0.2
																		0.981482	0.72973	0.962264	0.810585	0.769231	0.39645	-0.185792	0.487179	-0.962963	0.961905	0.549598	0.774193	0.647059	-0.780822	-0.636364	0.853659	0.43949	0.714286	-0.135135	0.405405	-0.707317	-0.904762	-0.913044	0.615023	0.0985916	0.566667	0.125	-0.0909091	0.534884	-0.393939		-0.2
																		0.981482	0.72973	0.962264	0.805556	0.769231	0.39645	-0.185792	0.487179	-0.962963	0.961905	0.550802	0.774193	0.647059	-0.780822	-0.636364	0.853659	0.43949	0.714286	-0.135135	0.405405	-0.707317	-0.904762	-0.913044	0.615023	0.0985916	0.566667	0.125	-0.0909091	0.534884	-0.393939		-0.2
																		0.981482	0.72973	0.962264	0.805556	0.769231	0.39645	-0.185792	0.487179	-0.962963	0.961905	0.559055	0.774193	0.647059	-0.780822	-0.636364	0.853659	0.43949	0.714286	-0.135135	0.405405	-0.707317	-0.904762	-0.913044	0.615023	0.0909091	0.566667	0.125	-0.0909091	0.534884	-0.393939		-0.2
																		0.981482	0.72973	0.962264	0.805556	0.769231	0.39645	-0.185792	0.487179	-0.962963	0.961905	0.559055	0.774193	0.647059	-0.780822	-0.636364	0.853659	0.43949	0.714286	-0.135135	0.405405	-0.707317	-0.904762	-0.913044	0.615023	0.0909091	0.566667	0.125	-0.0909091	0.534884	-0.393939		-0.2
																		0.981482	0.72973	0.962264	0.805556	0.769231	0.39645	-0.185792	0.487179	-0.962963	0.961905	0.560209	0.774193	0.647059	-0.780822	-0.636364	0.853659	0.43949	0.714286	-0.135135	0.405405	-0.707317	-0.904762	-0.913044	0.615023	0.0833333	0.566667	0.125	-0.0909091	0.534884	-0.393939		-0.2
																		0.981482	0.72973	0.962264	0.805556	0.769231	0.39645	-0.185792	0.487179	-0.962963	0.961905	0.560209	0.774193	0.647059	-0.780822	-0.636364	0.853659	0.43949	0.714286	-0.135135	0.405405	-0.707317	-0.904762	-0.913044	0.615023	0.0833333	0.566667	0.125	-0.0909091	0.534884	-0.393939		-0.2
																		0.981482	0.72973	0.962264	0.805556	0.769231	0.39645	-0.184175	0.487179	-0.962963	0.961905	0.560209	0.774193	0.647059	-0.780822	-0.636364	0.853659	0.43949	0.714286	-0.135135	0.405405	-0.707317	-0.904762	-0.913044	0.615023	0.0833333	0.566667	0.125	-0.0909091	0.534884	-0.393939		-0.2
																		0.981482	0.72973	0.962264	0.805556	0.769231	0.39645	-0.17456	0.487179	-0.962963	0.961905	0.560209	0.774193	0.647059	-0.780822	-0.636364	0.853659	0.43949	0.714286	-0.135135	0.405405	-0.707317	-0.904762	-0.913044	0.615023	0.0758621	0.566667	0.125	-0.0909091	0.534884	-0.393939		-0.2
																		0.981482	0.72973	0.962264	0.805556	0.769231	0.39645	-0.166667	0.487179	-0.962963	0.961905	0.560209	0.774193	0.647059	-0.780822	-0.636364	0.853659	0.43949	0.714286	-0.135135	0.405405	-0.707317	-0.904762	-0.913044	0.615023	0.0758621	0.566667	0.125	-0.0909091	0.534884	-0.393939		-0.2
																		0.981482	0.72973	0.962264	0.805556	0.769231	0.39645	-0.155792	0.487179	-0.962963	0.961905	0.560209	0.774193	0.647059	-0.780822	-0.657143	0.853659	0.43949	0.714286	-0.135135	0.405405	-0.707317	-0.904762	-0.913044	0.615023	0.0612245	0.566667	0.125	-0.0909091	0.534884	-0.393939		-0.2
																		0.981482	0.72973	0.962264	0.805556	0.769231	0.39645	-0.152722	0.487179	-0.962963	0.961905	0.560209	0.774193	0.647059	-0.780822	-0.657143	0.853659	0.43949	0.714286	-0.135135	0.405405	-0.707317	-0.904762	-0.913044	0.607477	0.0612245	0.566667	0.125	-0.0909091	0.534884	-0.393939		-0.2
																		0.981482	0.72973	0.962264	0.805556	0.769231	0.39645	-0.152722	0.487179	-0.962963	0.961905	0.560209	0.774193	0.647059	-0.780822	-0.657143	0.853659	0.43949	0.714286	-0.135135	0.405405	-0.707317	-0.904762	-0.913044	0.563636	0.0612245	0.566667	0.125	-0.0909091	0.534884	-0.393939		-0.2
																		0.981482	0.72973	0.962264	0.805556	0.769231	0.39645	-0.151194	0.487179	-0.962963	0.961905	0.560209	0.774193	0.647059	-0.780822	-0.657143	0.853659	0.43949	0.714286	-0.135135	0.405405	-0.707317	-0.904762	-0.913044	0.565611	0.0612245	0.566667	0.125	-0.0909091	0.534884	-0.393939		-0.2
																		0.981482	0.72973	0.962264	0.805556	0.769231	0.39645	-0.151194	0.487179	-0.962963	0.961905	0.560209	0.774193	0.647059	-0.780822	-0.657143	0.853659	0.43949	0.714286	-0.135135	0.405405	-0.707317	-0.904762	-0.913044	0.580786	0.0612245	0.566667	0.125	-0.0909091	0.534884	-0.393939		-0.2
																		0.981482	0.72973	0.962264	0.805556	0.769231	0.39645	-0.151194	0.487179	-0.962963	0.961905	0.560209	0.774193	0.647059	-0.780822	-0.657143	0.853659	0.43949	0.714286	-0.135135	0.405405	-0.707317	-0.904762	-0.913044	0.59322	0.054054	0.566667	0.125	-0.0909091	0.534884	-0.393939		-0.2
																		0.981482	0.72973	0.962264	0.805556	0.769231	0.39645	-0.151194	0.487179	-0.962963	0.961905	0.560209	0.774193	0.647059	-0.780822	-0.657143	0.853659	0.43949	0.714286	-0.135135	0.405405	-0.707317	-0.904762	-0.913044	0.6	0.054054	0.566667	0.125	-0.0909091	0.534884	-0.393939		-0.2
																		0.981482	0.72973	0.962264	0.805556	0.769231	0.39645	-0.151194	0.487179	-0.962963	0.961905	0.560209	0.774193	0.647059	-0.780822	-0.657143	0.853659	0.43949	0.714286	-0.135135	0.405405	-0.707317	-0.904762	-0.913044	0.6	0.054054	0.566667	0.125	-0.0909091	0.534884	-0.393939		-0.2
																		0.981482	0.72973	0.962264	0.805556	0.769231	0.39645	-0.151194	0.487179	-0.962963	0.961905	0.560209	0.774193	0.647059	-0.780822	-0.657143	0.853659	0.43949	0.714286	-0.135135	0.405405	-0.707317	-0.904762	-0.913044	0.60166	0.054054	0.566667	0.125	-0.0909091	0.534884	-0.393939		-0.2
																		0.981482	0.72973	0.962264	0.805556	0.769231	0.39645	-0.151194	0.487179	-0.962963	0.961905	0.560209	0.774193	0.647059	-0.780822	-0.657143	0.853659	0.43949	0.714286	-0.135135	0.405405	-0.707317	-0.904762	-0.913044	0.60166	0.054054	0.566667	0.125	-0.0909091	0.534884	-0.393939		-0.2
																		0.981482	0.72973	0.962264	0.805556	0.769231	0.39645	-0.151194	0.487179	-0.962963	0.961905	0.560209	0.774193	0.647059	-0.780822	-0.657143	0.853659	0.43949	0.714286	-0.135135	0.405405	-0.707317	-0.904762	-0.913044	0.60166	0.054054	0.566667	0.125	-0.0909091	0.534884	-0.393939		-0.2
																		0.981482	0.72973	0.962264	0.805556	0.769231	0.39645	-0.151194	0.487179	-0.962963	0.961905	0.560209	0.774193	0.647059	-0.780822	-0.657143	0.853659	0.43949	0.714286	-0.135135	0.405405	-0.707317	-0.904762	-0.913044	0.60166	0.054054	0.566667	0.125	-0.0909091	0.534884	-0.393939		-0.2
																		0.981482	0.72973	0.962264	0.805556	0.769231	0.39645	-0.151194	0.487179	-0.962963	0.961905	0.560209	0.774193	0.647059	-0.780822	-0.657143	0.853659	0.43949	0.714286	-0.135135	0.405405	-0.707317	-0.904762	-0.913044	0.60166	0.054054	0.566667	0.125	-0.0909091	0.534884	-0.393939		-0.2
																		0.981482	0.72973	0.962264	0.805556	0.769231	0.39645	-0.151194	0.487179	-0.962963	0.961905	0.560209	0.774193	0.647059	-0.780822	-0.657143	0.853659	0.43949	0.714286	-0.135135	0.405405	-0.707317	-0.904762	-0.913044	0.60166	0.054054	0.566667	0.125	-0.0909091	0.534884	-0.393939		-0.2
																		0.981482	0.72973	0.962264	0.805556	0.769231	0.39645	-0.151194	0.487179	-0.962963	0.961905	0.560209	0.774193	0.647059	-0.780822	-0.657143	0.853659	0.43949	0.714286	-0.135135	0.405405	-0.707317	-0.904762	-0.913044	0.60166	0.054054	0.566667	0.125	-0.0909091	0.534884	-0.393939		-0.2
																		0.981482	0.72973	0.962264	0.805556	0.769231	0.39645	-0.151194	0.487179	-0.962963	0.961905	0.560209	0.774193	0.647059	-0.780822	-0.657143	0.853659	0.43949	0.714286	-0.135135	0.405405	-0.707317	-0.904762	-0.913044	0.60166	0.054054	0.570248	0.125	-0.0909091	0.534884	-0.393939		-0.2
																		0.981482	0.72973	0.962264	0.805556	0.769231	0.39645	-0.151194	0.487179	-0.962963	0.961905	0.560209	0.774193	0.647059	-0.780822	-0.657143	0.831325	0.43949	0.714286	-0.135135	0.405405	-0.707317	-0.904762	-0.913044	0.581967	0.054054	0.584	0.125	-0.0909091	0.534884	-0.393939		-0.2
																		0.981482	0.72973	0.962264	0.805556	0.769231	0.39645	-0.151194	0.487179	-0.962963	0.961905	0.560209	0.774193	0.647059	-0.780822	-0.657143	0.831325	0.43949	0.714286	-0.135135	0.405405	-0.707317	-0.904762	-0.913044	0.537849	0.054054	0.584	0.125	-0.0909091	0.534884	-0.393939		-0.2
																		0.981482	0.72973	0.962264	0.805556	0.769231	0.39645	-0.151194	0.487179	-0.962963	0.961905	0.560209	0.71875	0.647059	-0.780822	-0.657143	0.767442	0.43949	0.714286	-0.135135	0.405405	-0.707317	-0.904762	-0.913044	0.496124	0.0469799	0.584	0.125	-0.0909091	0.534884	-0.393939		-0.2
																		0.981482	0.72973	0.962264	0.805556	0.769231	0.39645	-0.151194	0.487179	-0.962963	0.961905	0.560209	0.571429	0.647059	-0.780822	-0.657143	0.767442	0.43949	0.714286	-0.135135	0.405405	-0.707317	-0.904762	-0.913044	0.496124	0.0469799	0.584	0.125	-0.0909091	0.534884	-0.393939		-0.2
																		0.981482	0.72973	0.962264	0.805556	0.769231	0.39645	-0.151194	0.487179	-0.962963	0.961905	0.560209	0.571429	0.647059	-0.780822	-0.657143	0.767442	0.43949	0.714286	-0.135135	0.405405	-0.707317	-0.904762	-0.913044	0.496124	0.0469799	0.584	0.125	-0.0909091	0.534884	-0.393939		-0.2
																		0.981482	0.72973	0.962264	0.805556	0.769231	0.39645	-0.151194	0.45	-0.962963	0.961905	0.560209	0.571429	0.647059	-0.780822	-0.657143	0.767442	0.43949	0.714286	-0.135135	0.405405	-0.707317	-0.904762	-0.913044	0.496124	0.0469799	0.584	0.125	-0.0909091	0.534884	-0.393939		-0.2
																		0.981482	0.72973	0.962264	0.805556	0.769231	0.39645	-0.151194	0.414634	-0.962963	0.961905	0.560209	0.571429	0.647059	-0.780822	-0.657143	0.767442	0.43949	0.714286	-0.135135	0.405405	-0.707317	-0.904762	-0.913044	0.496124	0.0469799	0.584	0.125	-0.0909091	0.534884	-0.393939		-0.2
																		0.981482	0.72973	0.962264	0.805556	0.769231	0.39645	-0.151194	0.380952	-0.962963	0.961905	0.560209	0.571429	0.647059	-0.780822	-0.657143	0.767442	0.43949	0.714286	-0.135135	0.405405	-0.707317	-0.904762	-0.913044	0.496124	0.0469799	0.584	0.125	-0.0909091	0.534884	-0.393939		-0.2
																		0.981482	0.72973	0.962264	0.805556	0.769231	0.39645	-0.151194	0.385827	-0.962963	0.961905	0.560209	0.571429	0.647059	-0.780822	-0.657143	0.767442	0.43949	0.714286	-0.135135	0.405405	-0.707317	-0.904762	-0.913044	0.496124	0.0469799	0.584	0.125	-0.0909091	0.534884	-0.393939		-0.2
																		0.981482	0.72973	0.962264	0.805556	0.769231	0.39645	-0.151194	0.395349	-0.962963	0.961905	0.560209	0.571429	0.647059	-0.780822	-0.657143	0.767442	0.43949	0.714286	-0.135135	0.405405	-0.707317	-0.904762	-0.913044	0.496124	0.0469799	0.584	0.125	-0.0909091	0.534884	-0.393939		-0.2
																		0.981482	0.72973	0.962264	0.771117	0.769231	0.39645	-0.151194	0.395349	-0.962963	0.961905	0.560209	0.571429	0.647059	-0.780822	-0.657143	0.767442	0.43949	0.714286	-0.135135	0.405405	-0.707317	-0.904762	-0.913044	0.496124	0.0469799	0.584	0.125	-0.0909091	0.534884	-0.393939		-0.2
																		0.981482	0.72973	0.962264	0.771117	0.769231	0.39645	-0.151194	0.395349	-0.962963	0.961905	0.560209	0.571429	0.647059	-0.780822	-0.657143	0.767442	0.43949	0.714286	-0.135135	0.405405	-0.707317	-0.904762	-0.913044	0.496124	0.0469799	0.584	0.0909091	-0.0909091	0.534884	-0.393939		-0.2
																		0.981482	0.72973	0.962264	0.771117	0.769231	0.39645	-0.151194	0.395349	-0.962963	0.961905	0.560209	0.571429	0.647059	-0.780822	-0.657143	0.767442	0.43949	0.714286	-0.135135	0.405405	-0.707317	-0.904762	-0.913044	0.496124	0.0469799	0.584	0.0909091	-0.0909091	0.534884	-0.393939		-0.2
																		0.981482	0.72973	0.962264	0.771117	0.769231	0.39645	-0.151194	0.395349	-0.962963	0.961905	0.560209	0.571429	0.647059	-0.780822	-0.657143	0.767442	0.43949	0.714286	-0.135135	0.405405	-0.707317	-0.904762	-0.913044	0.496124	0.0469799	0.584	0.0909091	-0.0909091	0.534884	-0.393939		-0.2
																		0.981482	0.72973	0.962264	0.771117	0.769231	0.39645	-0.151194	0.395349	-0.962963	0.961905	0.560209	0.571429	0.647059	-0.780822	-0.657143	0.767442	0.43949	0.714286	-0.135135	0.405405	-0.707317	-0.904762	-0.913044	0.496124	0.0469799	0.584	0.0909091	-0.0909091	0.534884	-0.393939		-0.2
																		0.981482	0.72973	0.962264	0.771117	0.770992	0.39645	-0.151194	0.384615	-0.962963	0.961905	0.560209	0.571429	0.647059	-0.780822	-0.657143	0.767442	0.43949	0.714286	-0.135135	0.405405	-0.707317	-0.904762	-0.913044	0.496124	0.0469799	0.584	0.0909091	-0.0909091	0.534884	-0.393939		-0.2
																		0.981482	0.72973	0.962264	0.771117	0.770992	0.39645	-0.151194	0.384615	-0.962963	0.961905	0.560209	0.571429	0.647059	-0.780822	-0.657143	0.767442	0.43949	0.714286	-0.135135	0.405405	-0.707317	-0.904762	-0.913044	0.496124	0.0469799	0.584	0.0909091	-0.0909091	0.534884	-0.393939		-0.2
																		0.981482	0.72973	0.962264	0.771117	0.770992	0.39645	-0.151194	0.384615	-0.962963	0.961905	0.560209	0.571429	0.647059	-0.780822	-0.657143	0.767442	0.43949	0.714286	-0.135135	0.405405	-0.707317	-0.904762	-0.913044	0.496124	0.0469799	0.584	0.0909091	-0.0909091	0.534884	-0.393939		-0.2
																		0.981482	0.72973	0.962264	0.771117	0.770992	0.39645	-0.151194	0.384615	-0.962963	0.961905	0.560209	0.571429	0.647059	-0.780822	-0.657143	0.767442	0.43949	0.714286	-0.135135	0.405405	-0.707317	-0.904762	-0.913044	0.496124	0.0331126	0.584	0.0909091	-0.0909091	0.534884	-0.393939		-0.2
																		0.981482	0.72973	0.962264	0.771117	0.770992	0.39645	-0.151194	0.384615	-0.962963	0.961905	0.528205	0.571429	0.647059	-0.780822	-0.657143	0.767442	0.43949	0.714286	-0.135135	0.405405	-0.707317	-0.904762	-0.913044	0.496124	0.0331126	0.584	0.0909091	-0.0909091	0.534884	-0.393939		-0.2
																		0.981482	0.72973	0.962264	0.771117	0.770992	0.39645	-0.151194	0.384615	-0.962963	0.961905	0.528205	0.571429	0.647059	-0.780822	-0.657143	0.767442	0.43949	0.714286	-0.135135	0.405405	-0.707317	-0.904762	-0.913044	0.496124	0.0331126	0.584	0.0909091	-0.0909091	0.534884	-0.393939		-0.2
																		0.981482	0.72973	0.925926	0.771117	0.770992	0.39645	-0.151194	0.384615	-0.962963	0.961905	0.528205	0.571429	0.647059	-0.780822	-0.657143	0.767442	0.43949	0.714286	-0.135135	0.405405	-0.707317	-0.904762	-0.913044	0.496124	0.0331126	0.584	0.0909091	-0.0909091	0.534884	-0.393939		-0.2
																		0.981482	0.72973	0.925926	0.771117	0.770992	0.39645	-0.151194	0.384615	-0.962963	0.961905	0.528205	0.571429	0.647059	-0.780822	-0.657143	0.767442	0.43949	0.714286	-0.135135	0.405405	-0.707317	-0.904762	-0.913044	0.496124	0.0331126	0.584	0.0909091	-0.0909091	0.534884	-0.393939		-0.2
																		0.981482	0.72973	0.925926	0.771117	0.770992	0.39645	-0.149669	0.384615	-0.962963	0.961905	0.528205	0.571429	0.647059	-0.780822	-0.657143	0.772727	0.43949	0.714286	-0.135135	0.405405	-0.707317	-0.904762	-0.913044	0.496124	0.0331126	0.584	0.0909091	-0.0909091	0.534884	-0.393939		-0.2
																		0.981482	0.72973	0.925926	0.771117	0.770992	0.39645	-0.142105	0.384615	-0.962963	0.961905	0.528205	0.571429	0.647059	-0.780822	-0.657143	0.772727	0.43949	0.714286	-0.135135	0.405405	-0.707317	-0.904762	-0.913044	0.496124	0.0331126	0.584	0.0909091	-0.0909091	0.534884	-0.393939		-0.2
																		0.981482	0.72973	0.925926	0.771117	0.770992	0.39645	-0.13464	0.384615	-0.962963	0.961905	0.528205	0.571429	0.647059	-0.780822	-0.657143	0.772727	0.43949	0.714286	-0.135135	0.405405	-0.707317	-0.904762	-0.913044	0.496124	0.0331126	0.584	0.0909091	-0.0909091	0.534884	-0.393939		-0.2
																		0.981482	0.72973	0.925926	0.771117	0.770992	0.39645	-0.130208	0.384615	-0.962963	0.961905	0.528205	0.571429	0.647059	-0.780822	-0.657143	0.772727	0.43949	0.714286	-0.135135	0.405405	-0.707317	-0.904762	-0.913044	0.496124	0.0331126	0.584	0.0909091	-0.0909091	0.534884	-0.393939		-0.2
																		0.981482	0.72973	0.925926	0.771117	0.770992	0.39645	-0.128739	0.384615	-0.962963	0.961905	0.528205	0.571429	0.647059	-0.780822	-0.657143	0.772727	0.43949	0.714286	-0.135135	0.405405	-0.707317	-0.904762	-0.913044	0.496124	0.0263158	0.584	0.0909091	-0.0909091	0.534884	-0.393939		-0.2
																		0.981482	0.72973	0.925926	0.771117	0.770992	0.39645	-0.128739	0.384615	-0.962963	0.961905	0.528205	0.571429	0.647059	-0.780822	-0.657143	0.772727	0.43949	0.714286	-0.135135	0.405405	-0.707317	-0.904762	-0.913044	0.496124	0.0263158	0.584	0.0909091	-0.0909091	0.534884	-0.393939		-0.2
																		0.981482	0.732143	0.925926	0.771117	0.770992	0.39645	-0.128739	0.384615	-0.962963	0.961905	0.528205	0.571429	0.647059	-0.780822	-0.657143	0.772727	0.43949	0.714286	-0.135135	0.405405	-0.707317	-0.904762	-0.913044	0.496124	0.0263158	0.584	0.0909091	-0.0909091	0.534884	-0.393939		-0.2
																		0.981482	0.732143	0.925926	0.771117	0.770992	0.39645	-0.128739	0.384615	-0.962963	0.961905	0.528205	0.571429	0.647059	-0.780822	-0.657143	0.772727	0.43949	0.714286	-0.135135	0.405405	-0.707317	-0.904762	-0.913044	0.496124	0.0263158	0.584	0.0909091	-0.0909091	0.534884	-0.393939		-0.2
																		0.981482	0.732143	0.925926	0.771117	0.770992	0.39645	-0.128739	0.384615	-0.962963	0.961905	0.528205	0.571429	0.647059	-0.780822	-0.657143	0.772727	0.43949	0.714286	-0.135135	0.405405	-0.707317	-0.904762	-0.913044	0.496124	0.0263158	0.584	0.0909091	-0.0909091	0.534884	-0.393939		-0.2
																		0.981482	0.732143	0.925926	0.771117	0.770992	0.39645	-0.128739	0.384615	-0.962963	0.961905	0.528205	0.571429	0.647059	-0.780822	-0.657143	0.772727	0.43949	0.714286	-0.135135	0.405405	-0.707317	-0.904762	-0.913044	0.496124	0.0263158	0.584	0.0909091	-0.0909091	0.534884	-0.393939		-0.2
																		0.981482	0.732143	0.925926	0.771117	0.770992	0.39645	-0.128739	0.384615	-0.962963	0.961905	0.528205	0.571429	0.647059	-0.780822	-0.657143	0.772727	0.43949	0.714286	-0.135135	0.405405	-0.707317	-0.904762	-0.913044	0.496124	0.0263158	0.584	0.0909091	-0.0909091	0.534884	-0.393939		-0.2
																		0.981482	0.732143	0.925926	0.756757	0.770992	0.39645	-0.128739	0.384615	-0.962963	0.961905	0.528205	0.571429	0.647059	-0.780822	-0.657143	0.772727	0.43949	0.714286	-0.135135	0.405405	-0.707317	-0.904762	-0.913044	0.496124	0.0263158	0.584	0.0909091	-0.0909091	0.534884	-0.393939		-0.2
																		0.981482	0.732143	0.925926	0.756757	0.770992	0.39645	-0.128739	0.384615	-0.962963	0.961905	0.528205	0.571429	0.473684	-0.780822	-0.657143	0.772727	0.43949	0.714286	-0.135135	0.405405	-0.707317	-0.904762	-0.913044	0.496124	0.0263158	0.584	0.0909091	-0.0909091	0.534884	-0.393939		-0.2
																		0.981482	0.732143	0.925926	0.756757	0.770992	0.39645	-0.128739	0.384615	-0.962963	0.961905	0.528205	0.571429	0.12	-0.780822	-0.657143	0.772727	0.43949	0.714286	-0.135135	0.405405	-0.707317	-0.904762	-0.913044	0.496124	0.0263158	0.584	0.0909091	-0.0909091	0.534884	-0.393939		-0.2
																		0.981482	0.732143	0.925926	0.756757	0.770992	0.39645	-0.128739	0.384615	-0.962963	0.961905	0.528205	0.571429	-0.0344828	-0.780822	-0.657143	0.772727	0.43949	0.714286	-0.135135	0.405405	-0.707317	-0.904762	-0.913044	0.496124	0.0263158	0.584	0.0909091	-0.0909091	0.534884	-0.393939		-0.2
																		0.981482	0.732143	0.925926	0.756757	0.770992	0.39645	-0.128739	0.384615	-0.962963	0.961905	0.528205	0.571429	-0.222222	-0.780822	-0.657143	0.772727	0.43949	0.714286	-0.135135	0.405405	-0.707317	-0.904762	-0.913044	0.496124	0.0263158	0.584	0.0909091	-0.0909091	0.534884	-0.393939		-0.2
																		0.981482	0.732143	0.925926	0.756757	0.770992	0.39645	-0.128739	0.384615	-0.962963	0.961905	0.528205	0.571429	-0.3	-0.780822	-0.657143	0.772727	0.43949	0.714286	-0.135135	0.405405	-0.707317	-0.904762	-0.913044	0.496124	0.0263158	0.584	0.0909091	-0.0909091	0.534884	-0.393939		-0.2
																		0.981482	0.732143	0.925926	0.756757	0.770992	0.39645	-0.121447	0.384615	-0.962963	0.961905	0.534177	0.571429	-0.317073	-0.780822	-0.657143	0.772727	0.43949	0.714286	-0.135135	0.405405	-0.707317	-0.904762	-0.913044	0.496124	0.0263158	0.584	0.0909091	-0.0909091	0.534884	-0.393939		-0.2
																		0.981482	0.732143	0.925926	0.756757	0.770992	0.39645	-0.112821	0.384615	-0.962963	0.961905	0.537688	0.571429	-0.317073	-0.780822	-0.657143	0.772727	0.43949	0.714286	-0.135135	0.405405	-0.707317	-0.904762	-0.913044	0.496124	0.0263158	0.584	0.0909091	-0.0909091	0.534884	-0.393939		-0.2
																		0.981482	0.732143	0.925926	0.756757	0.770992	0.39645	-0.104326	0.384615	-0.962963	0.961905	0.542288	0.571429	-0.317073	-0.780822	-0.657143	0.772727	0.43949	0.714286	-0.135135	0.405405	-0.707317	-0.904762	-0.913044	0.496124	0.0263158	0.584	0.0909091	-0.0909091	0.534884	-0.393939		-0.2
																		0.981482	0.732143	0.925926	0.756757	0.770992	0.39645	-0.101523	0.384615	-0.962963	0.961905	0.543424	0.571429	-0.317073	-0.780822	-0.657143	0.772727	0.43949	0.714286	-0.135135	0.405405	-0.707317	-0.904762	-0.913044	0.496124	0.0263158	0.584	0.0909091	-0.0909091	0.534884	-0.393939		-0.2
																		0.981651	0.732143	0.925926	0.756757	0.770992	0.39645	-0.100127	0.384615	-0.962963	0.961905	0.545679	0.571429	-0.317073	-0.780822	-0.657143	0.772727	0.43949	0.714286	-0.135135	0.405405	-0.707317	-0.904762	-0.913044	0.496124	0.0263158	0.584	0.0909091	-0.0909091	0.534884	-0.393939		-0.2
																		0.981651	0.732143	0.925926	0.756757	0.770992	0.39645	-0.100127	0.384615	-0.962963	0.961905	0.547911	0.571429	-0.317073	-0.780822	-0.657143	0.772727	0.43949	0.714286	-0.135135	0.405405	-0.707317	-0.904762	-0.913044	0.496124	0.0263158	0.584	0.0909091	-0.0909091	0.534884	-0.393939		-0.2
																		0.981651	0.732143	0.925926	0.756757	0.770992	0.39645	-0.100127	0.384615	-0.962963	0.961905	0.547911	0.571429	-0.317073	-0.780822	-0.657143	0.772727	0.43949	0.714286	-0.135135	0.405405	-0.707317	-0.904762	-0.913044	0.496124	0.0263158	0.584	0.0909091	-0.0909091	0.534884	-0.393939		-0.333333
																		0.981651	0.732143	0.925926	0.756757	0.770992	0.39645	-0.100127	0.384615	-0.962963	0.961905	0.551219	0.571429	-0.317073	-0.780822	-0.657143	0.772727	0.43949	0.714286	-0.135135	0.405405	-0.707317	-0.904762	-0.913044	0.496124	0.0263158	0.584	0.0909091	-0.0909091	0.534884	-0.393939		-0.333333
																		0.981651	0.732143	0.925926	0.756757	0.770992	0.39645	-0.100127	0.384615	-0.962963	0.961905	0.556627	0.571429	-0.317073	-0.780822	-0.675676	0.772727	0.43949	0.714286	-0.135135	0.405405	-0.707317	-0.904762	-0.913044	0.496124	0.0263158	0.584	0.0909091	-0.0909091	0.534884	-0.393939		-0.333333
																		0.981651	0.732143	0.925926	0.756757	0.770992	0.39645	-0.100127	0.384615	-0.962963	0.961905	0.557692	0.571429	-0.317073	-0.780822	-0.675676	0.772727	0.43949	0.714286	-0.135135	0.405405	-0.707317	-0.904762	-0.913044	0.496124	0.0263158	0.584	0.0909091	-0.0909091	0.534884	-0.393939		-0.333333
[truncated: 2,055 more rows]
[truncated: 65 more columns]

## Sheet: D) Gr43a STM
Training					Testing											Timecurves	testing
PI: ret -	PI:ret +	PI: +>Chrimson	PI:+>Gr43a		PI: ret -	PI:ret +	PI: +>Chrimson	PI: +>Gr43a									Gr43a>CsChrimson ret +																							Gr43aCsChrimson ret -
[truncated: 3,601 more rows]
[truncated: 51 more columns]

## Sheet: E) Gr43a LTM
Training																				timecurve PI	testing
[truncated: 3,602 more rows]
[truncated: 49 more columns]
