# Supplementary material for: Optogenetic induction of appetitive and aversive taste memories in Drosophila
Source: eLife. 2023 Sep 26;12:e81535. doi: 10.7554/eLife.81535 (PMC10561975; doi:10.7554/eLife.81535)
Supplement: Figure 2—figure supplement 1—source data 1. [file elife-81535-fig2-figsupp1-data1.xlsx]

## Sheet: A)R58E02 agar vs agar
training		testing
ret+	ret-	ret+	ret-
-0.113636	-0.525	0.260274	-0.484375
0.205882	-0.617021	-0.704403	-0.588653
0.428571	-0.111111	0.483568	0.795918
-0.652174	-0.4	-0.280335	-0.325301
-0.655172	-0.352941	-0.838323	-0.0875
0.809524	-0.789474	-0.251366	-0.303571
-0.418605	-0.0810811	0.242718	0.183673
0.466667	-0.586207	-0.258064	0.244019
0.217391	0.75	-0.108434	-0.402062
0.333333	0.75	-0.562044	0.534091
-0.811321	0.230769	-0.0447761	0.468085
0.5	-0.866667	0.737327	0.661017
-0.153846	0.545455	-0.436735	-0.217391
0.636364	-0.8	0.457875	-0.0192308
-0.341463	0.5	0.512821	0.155556
-0.407407	0.253731	-0.0254237	-0.744361
0.130435	0.60396	-0.108434	-0.703704
-0.728395	0.156627	-0.26817	0.147059
-0.838384		0.414392	-0.2
-0.576471		-0.0825688	0.0857143
-0.363636		0.0743243	0.122807
-0.2		0.217742
		0.242604
		0.278788
		0.233786

## Sheet: C) naïve NaCl MPG
PI
-0.484375
-0.588653
0.795918
-0.325301
-0.0875
-0.303571
0.183673
0.244019
-0.402062
0.534091
0.468085
0.661017
-0.217391
-0.0192308
0.155556
-0.744361
-0.703704
0.147059
-0.2
0.0857143
0.122807

## Sheet: B) Gr43a agar v agar
Gr43a>Chr
training		testing
ret+	ret-	ret+	ret-
0.782036	0.65625	0.214076	-0.333333
0.54386	-0.345794	-0.789474	0.150685
0.984127	-0.297297	-0.0295858	0.4
0.813212	-0.125	-0.513513	0.294964
0.833773	-0.0588235	-0.611814	-0.618321
0.707762	0.0344828	-0.936364	-0.525424
0.7262	0.391304	0.171821	-0.662921
0.668317	0.857988	-0.521912	-0.608696
0.629371	0.105263	-0.697211	-0.362319
0.873377	0.393939	0.760684	-0.555556
0.551724	0.666667	0.113703	-0.556701
0.807829	-0.333333	0.552941	0.116279
0.938272	0.764706	0.445693	-0.145631
0.248619	-0.166667	0.235669	-0.0133333
0.83815	-0.580645	-0.684211	-0.0625
0.911765	0.39823	0.344828	0.647059
0.298429	0.389474	-0.255814	-0.845161
0.925373	0.906977	-0.141361	0.0839695
0.702038	0.125	0.0843374	0.630435
0.815889	-0.434783	-0.304348	0.709091
0.811728	0.0630631	-0.15942	0.458333
0.654676	-0.363636	0.630573	0.127273
0.680284		-0.854167	0.137931
0.893785			-0.0884354
0.970037			0.239437
			-0.652174

## Sheet: D) MPG vs Agar
R58E02
Training			Testing
PI: ret -	PI:ret +		PI: ret -	PI:ret +
0.463415	0.301205		0.220339	0.0605187
0.31	-0.851852		0.723077	0.433333
0.115646	0.31579		0.307692	0.249344
0.752809	0.268085		-0.75	0.925926
0.564356	-0.246377		0.763779	-0.221053
-0.121951	0.505263		0.388601	0.410853
-0.87234	-0.605634		-0.440678	0.607595
0.260606	0.169491		-0.00518135	0.808219
0.492537	-0.2		-0.460317	0.302682
0.0363636	-0.361702		0.0238095	0.657534
-0.811321	0.473684		0.225806	0.346154
-0.586207	0.219512		-0.807531	0.60166
-0.15	0.111111		0.808	0.737968
0.442786	-0.030303		-0.466667	0.657143
-0.692308	-0.828571		0.585477	0.440476
-0.87234	-0.311111		-0.727273	0.165048
-0.428571	-0.744			0.936093
0.642857	-0.498127			-0.32093
-0.52381

## Sheet: E) NaCl vs MPG
R58E02
Training			Testing
PI: ret -	PI:ret +		PI: ret -	PI:ret +
-0.333333	0.386667		-0.385621	-0.68932
0.155556	0.542857		-0.364706	0.555556
-0.759259	-0.16129		-0.110092	-0.578947
-0.548387	-0.148936		0.660777	-0.6
-0.758621	-0.625		0.903941	-0.0336134
-0.0188679	-0.692308		0.920732	0.314103
-0.428571	0.205128		-0.581818	-0.760446
-0.566265	0.275362		-0.0903955	-0.0873786
0.176471	-0.142857		0.010989	-0.902748
-0.56962	0.625		0.73913	0.277027
-0.290323	-0.0344828		-0.900552	-0.667622
-0.219512	0.271028		-0.36	-0.816667
0.558011	-0.352941		-0.040293	-0.654962
0.956044	-0.2		0.606987	-0.25
-0.504132	0.6		0.688623	0.707792
-0.218045	-0.972881		0.928328	0.306123
	0.466667		0.667897	-0.192157
	-0.333333		0.68	-0.095057
			0.470588

## Sheet: F) MPG as novel taste
R58E02
Training			Testing
PI: ret -	PI:ret +		PI: ret -	PI:ret +
-0.415385	-0.674419		0.636364	0.677419
-0.913979	-0.257143		-0.644444	0.722222
-0.333333	-0.2		-0.833333	0.67033
-0.142857	0.317073		-0.116667	-0.128834
-0.58042	-0.5		0.917526	-0.0461539
-0.827586	-0.518072		-0.375	-0.265823
-0.6	0.593985		0.913044	0.27572
0.945206	-0.123506		0.0327869	-0.534884
0.842105	0.573964		0.489796	0.0241936
0.267327	0.609023		0.0769231	0.174888
-0.0724638	0.706897		-0.224044	-0.4
0.813953	-0.230769		0.861818	-0.234234
-0.833333	-0.922078		-0.183432	-0.539568
-0.686275	-0.421053		0.611111	-0.727273
-0.230769	-0.352941		0.0701754	-0.764706
-0.84375	0.428571		0.953216	-0.418283
-0.625	-0.619048		-0.0725664	-0.342282
0.945946	0.529412		0.55157	-0.442857
-0.209302	0.736842		-0.269006	-0.215385
0.0851064	-0.0684932		0.733333	-0.319372
0.703704	-0.317073		0.362637	-0.458716
0.558824	0.268293		0.0704225
-0.636364			-0.665158
0.877193			-0.110092
0.11
-0.886792
0.0188679
0.255814
-0.666667
0.31377
