# Supplementary material for: Optogenetic induction of appetitive and aversive taste memories in Drosophila
Source: eLife. 2023 Sep 26;12:e81535. doi: 10.7554/eLife.81535 (PMC10561975; doi:10.7554/eLife.81535)
Supplement: Figure 2—source data 1. [file elife-81535-fig2-data1.xlsx]

## Sheet: a,b) MB504B STM
Training					Testing				PI timecurves	testing
PI: ret -	PI:ret +	PI: +>Chrimson	PI:+>MB504B		PI: ret -	PI:ret +	PI: +>Chrimson	PI:+>MB504B		MB504B>CsChrimson ret +																															MB504B>CsChrimson Ret -
-0.056	-0.555556	0.530612	0.726962		c	0.638554	0.538231	0.569444		0	0	0	0	0	0	0	0	0	0	0	0	0	0	0	0	0	0	0	0	0	0	0	0	0	0	0	0	0	0	0	0	0	0	0	0	0	0	0	0
0.294118	-0.552941	0.816514	0.144928		0.892135	-0.541463	0.353591	0.159533		0	0	0	0	0	0	0	0	0	0	0	0	0	0	0	0	0	0	0	0	0	0	0	0	0	0	0	0	0	0	0	0	0	0	0	0	0	0	0	0
-0.533333	-0.36	0.675676	-0.125		0.238866	0.350913	0.812317	0.67037		0	0	0	0	0	0	0	0	0	0	0	0	0	0	0	0	0	0	0	0	0	0	0	0	0	0	0	0	0	0	0	0	0	0	0	0	0	0	0	0
0.738095	-0.514286	0.928205	0.2		0.906137	-0.309524	0.115385	0.584416		0	0	0	0	0	0	0	0	0	0	0	0	0	0	0	0	0	0	0	0	0	0	0	0	0	0	0	0	0	0	0	0	0	0	0	0	0	0	0	0
0.87013	0.363636	0.688889	0.574468		0.688525	-0.6	0.821656	0.111111		0	0	0	0	0	0	0	0	0	0	0	0	0	0	0	0	0	0	0	0	0	0	0	0	0	0	0	0	0	0	0	0	0	0	0	0	0	0	0	0
0.465116	0.5125	0.957447	0.324675		0.296552	0.677852	0.720542	0.651282		0	0	0	0	0	0	0	0	0	0	0	0	0	0	0	0	0	0	0	0	0	0	0	0	0	0	0	0	0	0	0	0	0	0	0	0	0	0	0	0
0.826087	0.163934	-0.0979021	0.637051		0.485714	-0.972222	0.844007	0.774809		0	0	0	0	0	0	0	0	0	0	0	0	0	0	0	0	0	0	0	0	0	0	0	0	0	0	0	0	0	0	0	0	0	0	0	0	0	0	0	0
0.0322581	0.625	0.652459	0.233577		-0.226667	0.591837	0.705747	0.501014		0	0	0	0	0	0	0	0	0	0	0	0	0	0	0	0	0	0	0	0	0	0	0	0	0	0	0	0	0	0	0	0	0	0	0	0	0	0	0	0
0.6	-0.260274	0.19469	0.764977		0.601533	-0.87234	0.22449	0.750284		0	0	0	0	0	0	0	0	-0.333333	0	0	0	0	0	0	0	0	0	0	0	0	0	0	0	0	0	0	0	0	0	0	0	0	0	0	0	0	0	0	0
0.037037	0	0.537313	0.607251		0.138122	0.00483092	0.0384615	0.14759		0	0	0	0	0	0	0	0	-0.333333	0	0	0	0	0	0	0	0	0	0	0	0	0	0	0	0	0	0	0	0	0	0	0	0	0	0	0	0	0	0	0
-0.5	0.744928	0.653696	0.676768		0.514706	0.135659	0.30855	0.428571		0	0	0	0	0	0	0	0	-0.333333	0	0	0	0	0	0	0	0	0	0	0	0.5	0	0	0	0	0	0	0	0	0	0	0	0	0	0	0	0	0	0	0
0.823529	-0.24812	0.78626	0.873418		-0.236364	0.0769231	0.351351	0.414226		0	0	0	0	0	0	0	0	-0.5	0	0	0	0	0	0	0	0	0	0	0	0.5	0	0	0	0	0	0	0	0	0	0	0	0	0	0	0	0	0	0	0
0.809524	0.892683	0.573034	0.998925		0.797753	0.240506	0.709924	0.803922		0	0	0	0	0	0	0	0	-0.5	0	0	0	0	0.6	0	0	0	0	0	0	0.5	0	0	0	0	0	0	0	0	0	0	0	0	0	0	0	0	0	0	0
0.881874	0.808081	-0.275862	0.037037		0.654676	-0.20404	0.554913	0.49835		0	0	0	0	0	0	0	0	-0.5	0	0	0	0	0.6	0	0	0	0	0	0	0.5	0	0	0	0	0	0	0	0	0	0	0	0	0	0	0	0	0	0	0
0.884007	-0.495495	0.52	0.672727		0.834959	-0.935484	0.636364	0.725352		0	0	0	0	0	0	0	0	-0.5	0	0	0	0	0.6	0	0	0	0	0	0	0.5	0	0	0	0	0	0	0	0	0	0	0	0	0	0	0	0	0	0	0
-0.384615	-0.652174	-0.125	0.801724		0.485839	-0.589744	0.873563	0.841085		0	0	0	0	0	0	0	0	-0.5	0	0	0	0	0.6	0	0	0	0	0	0	0.5	0	0	0	0	0	0	0	0	0	0	0	0	0	0	0	0	0	0	0
0.6	0.589474	-0.0344828	0.378151		0.988858	0.133005	0.526786	0.779449		0	0	0	0	0	0	0	0	-0.5	0	0	0	0	0.6	0	0	0	0	0	0	0.5	0	0	0	0	0	0	0	0	0	0	0	0	0	0	0	0	0	0	0
0.545455	0.692308	0.19403	0.721519		0.952849	0.025974	0.62963	0.890995		0	0	0	0	0	0	0	0	-0.5	0	0	0	0	0.6	0	0	0	0	0	0	0.5	0	0	0	0	0	0	0	0	0	0	0	0	0	0	0	0	0	0	0
0.415094	0.475	0.213483	0.939614		-0.949367	0.0891089	0.123153	0.885417		0	0	0	0	0	0	0	0	-0.5	0	0	0	0	0.6	0	0	0	0	0	0	0.5	0	0	0	0	0	0	0	0	0	0	0	0	0	0	0	0	0	0	0
0.821767	-0.418605	0.51567			0.628692	0.207921	0.715556	0.629139		0	0	0	0	0	0	0	0	-0.5	0	0	0	0	0.6	0	0	0	0	0	0	0.5	0	0	0	0	0	0	0	0	0	0	0	0	0	0	0	0	0	0	0
0.144033	-0.947368	0.932203			0.977848	0.52	0.43949	0.885808		0	0	0	0	0	0	0	0	-0.5	0	0	0	0	0.6	0	0	0	0	0	0	0.5	0	0	0	0	0	0	0	0	0	0	0	0	0	0	0	0	0	0	0
0.990534	0.11828	-0.447917			0.676596	0.509434	0.810094			0	0	0	0	0	0	0	0	-0.5	0	0	0	0	0.6	0	0	0	0	0	0	0.5	0	0	0	0	0	0	0	0	0	0	0	0	0	0	0	0	0	0	0
0.968847	-0.229167				0.749495	0.700428	0.484076			0	0	0	0	0	0	0	0	-0.5	0	0	0	0	0.6	0	0	0	0	0	0	0.5	0	0	0	0	0	0	0	0	0	0	0	0	0	0	0	0	0	0	0
0.853448	0.603659				0.198433	0.659942				0	0	0	0	0	0	0	0	-0.5	0	0.333333	0	0	0.6	0	0	0	0	0	0	0.5	0	0	0	0	0	0	0	0	0	0	0	0	0	0	0	0	0	0	-0.333333
	0.666667					0.934118				0	0	0	0	0	0	0	0	-0.6	0	0.333333	0	0	0.6	0	0	0	0	0	0	0.5	0	0	0	0	0	0	0	0	0	0	0	0	0	0	0	0	0	0	0
	-0.225806					0.335689				0	0	0	0	0	0	0	0	-0.6	0	0.333333	0	0	0.6	0	0	0	0	0	0	0.5	0	0	0	0	0	0	0	0	0	0	0	0	0	0	0	0	0	0	0
	0.64486					0.548387				0	0	0	0	0	0	0	-0.333333	-0.6	0	0.5	0	-0.333333	0.6	0	0	0	0	0	0	0.5	0	0	0	0	0	0	0	0	0	0	0	0	0	0	0	0	0	0	0
	-0.636364					-0.771429				0	0	0	0	0	0	0	-0.333333	-0.6	0	0.5	0	-0.333333	0.6	0	0	0	0	0	0	0.5	0	0	0	0	0	0	0	0	0	0	0	0	0	0	0	0	0	0	0
	0.0740741					0.389831				0	0	0	0	0	0	0	-0.333333	-0.6	0	0.6	0	-0.333333	0.6	0	0	0	0	0	0	0.5	0	0	0	0	0	0	0	0	0	0	0	0	0	0	0	0	0	0	0
						0				0	0	0	0	0	0	0	-0.333333	-0.6	0	0.6	0.333333	-0.333333	0.6	0	0	0	0	0	0	0.5	0	0	0	0	0	0	0	0	0	0	0	0	0	0	0	0	0	0	0
						-0.428571				0	0	0	0	0	0	0	-0.333333	-0.6	0	0.6	0.333333	-0.333333	0.6	0	0	0	0	0	0	0.5	0	0	0	0	0	0	0	0	0	0	0	0	0	0	0	0	0	0	0
										0	0	0	0	0	0	0	-0.333333	-0.666667	0	0.6	0.333333	-0.333333	0.6	0	0	0	0	0	0	0.5	0	0	0	0	0	0	0	0	0	0	0	0	0	0	0	0	0	0	0
										0	0	0	0	0	0	0	-0.333333	-0.666667	0	0.6	0.333333	-0.333333	0.6	0	0	0	0	0	0	0.5	0	0	0	0	0	0	0	0	0	0	0	0	0	0	0	0	0	0	0
										0	0	0	0	0	0	0	-0.333333	-0.666667	0	0.6	0.333333	-0.333333	0.6	0	0	0	0	0	0	0.5	0	0	0	0	0	0	0	0	0	0	0	0	0	0	0	0	0	0	0
										0	0	0	0	0	0	0	-0.5	-0.666667	0	0.6	0.333333	-0.333333	0.6	0	0	0	0	0	0	0.5	0	0	0	0	0	0	0	0	0	0	0	0	0	0	0	0	0	0	0
										0	0	0	0	0	0	0	-0.5	-0.714286	0	0.6	0.333333	-0.333333	0.6	0	0	0	0	0	0	0.5	0	0	0	0	0	0	0	0	0	0	0	0	0	0	0	0	0	0	0
										0	0	0	0	0	0	0	-0.5	-0.75	0	0.6	0.333333	-0.333333	0.6	0	0	0	0	0	0	0.5	0	0	0	0	0	0	0	0	0	0	0	0	0	0	0	0	0	0	0
										0	0	0	0	0	0	0	-0.5	-0.75	0	0.6	0.333333	-0.333333	0.6	0	0	0	0	0	0	0.5	0	0	0	0	0	0	0	0	0	0	0	0	0	0	0	0	0	0	0
										0	0	0	0	0	0	0	-0.5	-0.75	0	0.6	0.333333	-0.333333	0.6	0	0	0	0	0	0	0.5	0	0	0	0	0	0	0	0	0	0	0	0	0	0	0	0	0	0	0
										0	0	0	0	0	0	0	-0.5	-0.75	0	0.6	0.333333	-0.333333	0.6	0	0	0	0	0	0	0.5	0	0	0	0	0	0	0	0	0	0	0	0	0	0	0	0	0	0	0
										0	0	0	0	0	0	0	-0.5	-0.75	0	0.6	0.333333	-0.333333	0.6	0	0	0	0	0	0	0.5	0	0	0	0	0	0	0	0	0	0	0	0	0	0	0	0	0	0	0
										0	0	0	0	0	0	0	-0.5	-0.75	0	0.6	0.333333	-0.333333	0.6	0	0	0	0	0	0	0.5	0	0	0	0	0	0	0	0	0	0	0	0	0	0	0	0	0	0	0
										0	0	0	0	0	0	0	-0.5	-0.75	0	0.666667	0.333333	-0.333333	0.6	0	0	0	0	0	0	0.5	0	0	0	0	0	0	0	0	0	0	0	0	0	0	0	0	0	0	0
										0	0	0	0	0	0	0	-0.5	-0.75	0	0.666667	0.333333	-0.333333	0.6	0	0	0	0	0	0	0.5	0	0	0	0	0	0	0	0	0	0	0	0	0	0	0	0	0	0	0
										0	0	0	0	0	0	0	-0.5	-0.75	0	0.714286	0.333333	-0.333333	0.6	0	0	0	0	0	0	0.5	0	0	0	0	0	0	0	0	0	0	0	0	0	0	0	0	0	0	0
										0	0	0	0	0	0	0	-0.5	-0.75	0	0.714286	0.333333	-0.333333	0.6	0	0	0.666667	0	0	0	0.5	0	0	0	0	0	0	0	0	0	0	0	0	0	0	0	0	0	0	0
										0	0	0	0	0	0	0	-0.5	-0.75	0	0.75	0.333333	-0.333333	0.6	0.333333	0	0.714286	0	0	0	0.5	0	0	0	0	0	0	0	0	0	0	0	0	0	0	0	0	0	0	0
										0	0	0	0	0	0	0	-0.5	-0.75	0	0.777778	0.333333	-0.333333	0.6	0.333333	0	0.75	0	0	0	0.5	0	0	0	0	0	0	0	0	0	0	0	0	0	0	0	0	0	0	0
										0	0	0	0	0	0	0	-0.5	-0.75	0	0.777778	0.333333	-0.333333	0.6	0.333333	0	0.75	0	0	0	0.5	0	0	0	0	0	0	0	0	0	0	0	0	0	0	0	0	0	0	0
										0	0	0	0	0	0	0	-0.5	-0.777778	0	0.777778	0.333333	-0.333333	0.6	0.333333	0	0.75	0	0	0	0.5	0	0	0	0	0	0	0	0	0	0	0	0	0	0	0	0	0	0	0
										0	0	0	0	0	0	0	-0.6	-0.777778	0	0.777778	0.333333	-0.333333	0.6	0.333333	0	0.75	0	0	0	0.5	0	0	0	0	0	0	0	0	0	0	0	0	0	0	0	0	0	0	0
										0	0	0	0	0	0	0	-0.6	-0.777778	0	0.777778	0.333333	-0.333333	0.6	0.333333	0	0.75	0	0	0	0.5	0	0	0	0	0	0	0	0	0	0	0	0	0	0	0	0	0	0	0
										0	0	0	0	0	0	0	-0.6	-0.777778	0	0.777778	0.333333	-0.333333	0.6	0.333333	0	0.75	0	0	0	0.5	0	0	0	0	0	0	0	0	0	0	0	0	0	0	0	0	0	0	0
										0	0	0	0	0	0	0	-0.6	-0.777778	0	0.777778	0.333333	-0.333333	0.666667	0.333333	0	0.75	0	0	0	0.5	0	0	0	0	0	0	0	0	0	0	0	0	0	0	0	0	0	0	0
										0	0	0	0	0	0	0	-0.6	-0.777778	0	0.777778	0.333333	-0.333333	0.777778	0.333333	0	0.75	0	0	0	0.5	0	0	0	0	0	0	0	0	0	0	0	0	0	0	0	0	0	0	0
										0	0	0	0	0	0	0	-0.6	-0.777778	0	0.777778	0.333333	-0.333333	0.777778	0.333333	0	0.75	0	0	0	0.5	0	0	0	0	0	0	0	0	0	0	0	0	0	0	0	0	0	0	0
										0	0	0	0	0	0	0	-0.6	-0.777778	0	0.8	0.333333	-0.333333	0.8	0.333333	0	0.75	0	0	0	0.5	0	0	0	0	0	0	0	0	0	0	0	0	0	0	0	0	0	0	0
										0	0	0	0	0	0	0	-0.6	-0.777778	0	0.8	0.333333	-0.333333	0.8	0.333333	0	0.75	0	0	0	0.5	0	0	0	0	0	0	0	0	0	0	0	0	0	0	0	0	0	0	0
										0	0	0	0	0	0	0	-0.666667	-0.777778	0	0.8	0.333333	-0.333333	0.636364	0.333333	0	0.75	0	0	0	0.5	0	0	0	0	0	0	0	0	0	0	0	0	0	0	0	0	0	0	0
										0	0	0	0	0	0	0	-0.666667	-0.8	0	0.8	0.333333	-0.333333	0.636364	0.6	0	0.75	0	0	0	0.5	0	0	0	0	0	0	0	0	0	0	0	0	0	0	0	0	0	0	0
										0	0	0	0	0	0	0	-0.666667	-0.8	0	0.8	0.333333	-0.333333	0.636364	0.6	0	0.75	0	0	0	0.5	0	0	0	0	0	0	0	0	0	0	0	0	0	0	0	0	0	0	0
										0	0	0	0	0	0	0	-0.666667	-0.818182	0	0.8	0.333333	-0.333333	0.5	0.6	0	0.75	0	0	0	0.5	0	0	0	0	0	0	0	0	0	0	0	0	0	0	0	0	0	0	0
										0	0	0	0	0	0	0	-0.666667	-0.818182	0	0.8	0.333333	-0.333333	0.5	0.6	0	0.75	0	0	0	0.5	0	0	0	0	0	0	0	0	0	0	0	0	0	0	0	0	0	0	0
										0	0	0	0	0	0	0	-0.666667	-0.818182	0	0.8	0.333333	-0.333333	0.384615	0.6	0	0.75	0	0	0	0.5	0	0	0	0	0	0	0	0	0	0	0	0	0	0	0	0	0	0	0
										0	0	0	0	0	0	0	-0.666667	-0.818182	0	0.8	0.333333	-0.333333	0.384615	0.6	0	0.75	0	0	0	0.5	0	0	0	0	0	0	0	0	0	0	0	0	0	0	0	0	0	0	0
										0	0	0	0	0	0	0	-0.666667	-0.818182	0	0.8	0.333333	-0.333333	0.384615	0.6	0	0.75	0	0	0	0.5	0	0	0	0	0	0	0	0	0	0	0	0	0	0	0	0	0	0	0
										0	0	0	0	0	0	0	-0.666667	-0.818182	0	0.8	0.333333	-0.333333	0.384615	0.6	0	0.75	0	0	0	0.5	0	0	0	0	0	0	0	0	0	0	0	0	0	0	0	0	0	0	0
										0	0	0	0	0	0	0	-0.666667	-0.818182	0	0.8	0.333333	-0.333333	0.384615	0.6	0	0.75	0	0	0	0.5	0	0	0	0	0	0	0	0	0	0	0	0	0	0	0	0	0	0	0
										0	0	0	0	0	0	0	-0.666667	-0.818182	0	0.8	0.333333	-0.333333	0.384615	0.6	0	0.75	0	0	0	0.5	0	0	0	0	0	0	0	0	0	0	0	0	0	0	0	0	0	0	0
										0	0	0	0	0	0	0	-0.714286	-0.818182	0	0.8	0.333333	-0.333333	0.285714	0.6	0	0.75	0	0	0	0.5	0	0	0	0	0	0	0	0	0	0	0	0	0	0	0	0	0	0	0
										0	0	0	0	0	0	0	-0.714286	-0.818182	0	0.8	0.333333	-0.333333	0.285714	0.6	0	0.75	0	0	0	0.5	0	0	0	0	0	0	0	0	0	0	0	0	0	0	0	0	0	0	0
										0	0	0	0	0	0	0	-0.714286	-0.818182	0	0.8	0.333333	-0.333333	0.285714	0.6	0	0.75	0	0	0	0.5	0	0	0	0	0	0	0	0	0	0	0	0	0	0	0	0	0	0	0
										0	0	0	0	0	0	0	-0.714286	-0.833333	0	0.8	0.333333	-0.333333	0.2	0.6	0	0.75	0	0	0	0.5	0	0	0	0	0	0	0	0	0	0	0	0	0	0	0	0	0	0	0
										0	0	0	0	0	0	0	-0.714286	-0.833333	0	0.8	0.333333	-0.333333	0.125	0.6	0	0.75	0	0	0	0.5	0	0	0	0	0	0	0	0	0	0	0	0	0	0	0	0	0	0	0
										0	0	0	0	0	0	0	-0.714286	-0.833333	0	0.8	0.333333	-0.333333	0.125	0.6	0	0.75	0	0	0	0.5	0	0	0	0	0	0	0	0	0	0	0	0	0	0	0	0	0	0	0
										0	0	0	0	0	0	0	-0.714286	-0.833333	0	0.8	0.333333	-0.333333	0.176471	0.6	0	0.75	0	0	0	0.5	0	0	0	0	0	0	0	0	0	0	0	0	0	0	0	0	0	0	0
										0	0	0	0	0	0	0	-0.714286	-0.833333	0	0.8	0.333333	-0.333333	0.111111	0.6	0	0.75	0	0	0	0.5	0	0	0	0	0	0	0	0	0	0	0	0	0	0	0	0	0	0	0
										0	0	0	0	0	0	0	-0.75	-0.833333	0	0.8	0.333333	-0.333333	0.111111	0.6	0	0.75	0	0	0	0.5	0	0	0	0	0	0	0	0	0	0	0	0	0	0	0	0	0	0	0
										0	0	0	0	0	0	0	-0.75	-0.846154	0	0.818182	0.333333	-0.333333	0.0526316	0.6	0	0.75	0	0	0	0.5	0	0	0	0	0	0	0	0	0	0	0	0	0	0	0	0	0	0	0
										0	0	0	0	0	0	0	-0.75	-0.846154	0	0.818182	0.333333	-0.333333	0.0526316	0.6	0	0.75	0	0	0	0.5	0	0	0	0	0	0	0	0	0	0	0	0	0	0	0	0	0	0	0
										0	0	0	0	0	0	0	-0.75	-0.846154	0	0.818182	0.333333	-0.333333	0.0526316	0.6	0	0.75	0	0	0	0.5	0	0	0	0	0	0	0	0	0	0	0	0	0	0	0	0	0	0	0
										0	0	0	0	0	0	0	-0.75	-0.846154	0	0.818182	0.333333	-0.333333	0.0526316	0.6	0	0.75	0	0	0	0.5	0	0	0	0	0	0	0	0	0	0	0	0	0	0	0	0	0	0	0
										0	0	0	0	0	0	0	-0.8	-0.857143	0	0.818182	0.333333	-0.333333	0.0526316	0.6	0	0.777778	0	0	0	0.5	0	0	0	0	0	0	0	0	0	0	0	0	0	0	0	0	0	0	0
										0	0	0	0	0	0	0	-0.8	-0.857143	0	0.818182	0.333333	-0.333333	0.0526316	0.6	0	0.777778	0	0	0	0.5	0	0	0	0	0	0	0	0	0	0	0	0	0	0	0	0	0	0	0
										0	0	0	0	0	0	0	-0.8	-0.857143	0	0.818182	0.333333	-0.333333	0.0526316	0.6	0	0.777778	0	0	0	0.5	0	0	0	0	0	0	0	0	0	0	0	0	0	0	0	0	0	0	0
										0	0	0	0	0	0	0	-0.8	-0.857143	0	0.818182	0.333333	-0.333333	0.0526316	0.6	0	0.777778	0	0	0	0.5	0	0	0	0	0	0	0	0	0	0	0	0	0	0	0	0	0	0	0
										0	0	0	0	0	0	0	-0.8	-0.857143	0	0.818182	0.333333	-0.333333	0.0526316	0.6	0	0.777778	0	0	0	0.5	0	0	0	0	0	0	0	0	0	0	0	0	0	0	0	0	0	0	0
										0	0	0	0	0	0	0	-0.8	-0.857143	0	0.818182	0.333333	-0.333333	0.0526316	0.6	0	0.777778	0	0	0	0.5	0	0	0	0	0	0	0	0	0	0	0	0	0	0	0	0	0	0	0
										0	0	0	0	0	0	0	-0.8	-0.857143	0	0.818182	0.333333	-0.333333	0.0526316	0.6	0	0.777778	0	0	0	0.5	0	0	0	0	0	0	0	0	0	0	0	0	0	0	0	0	0	0	0
										0	0	0	0	0	0	0	-0.8	-0.857143	0	0.818182	0.333333	-0.333333	0.0526316	0.6	0	0.777778	0	0	0	-0.4	0	0	0	0	0	0	0	0	0	0	0	0	0	0	0	0	0	0	0
										0	0	0	0	0	0	0	-0.8	-0.857143	0	0.818182	0.333333	-0.333333	0.0526316	0.6	0	0.777778	0	0	0	-0.4	0	0	0	0	0	0	0	0	0	0	0	0	0	0	0	0	0	0	0
										0	0	0	0	0	0	0	-0.8	-0.857143	0	0.833333	0.333333	-0.333333	0.0526316	0.6	0	0.777778	0	0	0	-0.4	0	0	0	0	0	0	0	0	0	0	0	0	0	0	0	0	0	0	0
										0	0	0	0	0	0	0	-0.8	-0.857143	0	0.833333	0.333333	-0.333333	0.0526316	0.6	0	0.777778	0	0	0	-0.4	0	0	0	0	0	0	0	0	0	0	0	0	0	0	0	0	0	0	0
										0	0	0	0	0	0	0	-0.8	-0.857143	0	0.833333	0.333333	-0.333333	0.0526316	0.6	0	0.777778	0	0	0	-0.4	0	0	0	0	0	0	0	0	0	0	0	0	0	0	0	0	0	0	0
										0	0	0	0	0	0	0	-0.8	-0.866667	0	0.833333	0.333333	-0.333333	0.0526316	0.6	0	0.777778	0	0	0	-0.4	0	0	0	0	0	0	0	0	0	0	0	0	0	0	0	0	0	0	0
										0	0	0	0	0	0	0	-0.8	-0.866667	0	0.833333	0.333333	-0.333333	0.0526316	0.6	0	0.777778	0	0	0	-0.4	0	0	0.333333	0	0	0	0	0	0	0	0	0	0	0	0	0	0	0	0
										0	0	0	0	0	0	0	-0.733333	-0.875	0	0.833333	0.333333	-0.333333	0.0526316	0.6	0	0.777778	0	0	0	-0.4	0	0	0.333333	0	0	0	0	0	0	0	0	0	0	0	0	0	0	0	0
										0	0	0	0	0	0	0	-0.733333	-0.875	0	0.833333	0.333333	-0.333333	0.0526316	0.6	0	0.777778	0	0	0	-0.4	0.666667	0	0.333333	0	0	0	0	0	0	0	0	0	0	0	0	0	0	0	0
										0	0	0	0	0	0	0	-0.75	-0.875	0	0.833333	0.333333	-0.333333	0.0526316	0.6	0	0.777778	0	0	0	-0.4	0.666667	0	0.333333	0	0	0	0	0	0	0	0	0	0	0	0	0	0	0	0
										0	0	0	0	0	0	0	-0.764706	-0.875	0	0.833333	0.333333	-0.333333	0.0526316	0.6	0	0.777778	0	0	0	-0.4	0.666667	0	0.333333	0	0	0	0	0	0	0	0	0	0	0	0	0	0	0	0
										0	0	0	0	0	0	0	-0.764706	-0.875	0	0.833333	0.333333	-0.333333	0	0.6	0	0.777778	0	0	0	-0.4	0.666667	0	0.333333	0	0	0	0	0	0	0	0	0	0	0	0	0	0	0	0
										0	0	0	0	0	0	0	-0.764706	-0.875	0	0.846154	0.333333	-0.333333	0	0.6	0	0.777778	0	0	0	-0.4	0.666667	0	0.333333	0	0	0	0	0	0	0	0	0	0	0	0	0	0	0	0
										0	0	0	0	0	0	0	-0.764706	-0.875	0	0.846154	0.333333	-0.333333	0	0.6	0	0.777778	0	0	0	-0.4	0.666667	0	0.333333	0	0	0	0	0	0	0	0	0	0	0	0	0	0	0	0
										0	0	0	0	0	0	0	-0.764706	-0.875	0	0.846154	0.333333	-0.333333	0	0.6	0	0.777778	0	0	0	-0.4	0.666667	0	0.333333	0	0	0	0	0	0	0	0	0	0	0	0	0	0	0	0
										0	0	0	0	0	0	0	-0.777778	-0.875	0	0.846154	0.333333	-0.333333	0	0.6	0	0.777778	0	0	0	-0.4	0.666667	0	0	0	0	0	0	0	0	0	0	0	0	0	0	0	0	0	0
										0	0	0	0	0	0	0	-0.777778	-0.875	0	0.846154	0.333333	-0.333333	0	0.6	0	0.777778	0	0	0	-0.4	0.666667	0	0	0	0	0	0	0	0	0	0	0	0	0	0	0	0	0	0
										0	0	0	0	0	0	0	-0.684211	-0.882353	0	0.846154	0.333333	-0.333333	0	0.6	0	0.777778	0	0	0	-0.4	0.666667	0	0	0	0	0	0	0	0	0	0	0	0	0	0	0	0	0	0
										0	0	0	0	0	0	0	-0.545454	-0.882353	0	0.846154	0.333333	-0.333333	0	0.6	0	0.777778	0	0	0	-0.4	0.666667	0	0	0	0	0	0	0	0	0	0	0	0	0	0	0	0	0	0
										0	0	0	0	0	0	0	-0.565217	-0.882353	0	0.846154	0.333333	-0.333333	0	0.833333	0	0.777778	0	0	0	-0.4	0.666667	0	0	0	0	0	0	0	0	0	0	0	0	0	0	0	0	0	0
										0	0	0	0	0	0	0	-0.565217	-0.882353	0	0.846154	0.333333	-0.333333	0.166667	0.846154	0	0.777778	0	0	0	-0.4	0.666667	0	0	0	0	0	0	0	0	0	0	0	0	0	0	0	0	0	0
										0	0	0	0	0	0	0	-0.565217	-0.882353	0	0.846154	0.333333	-0.333333	0.285714	0.846154	0	0.777778	0	0	0	-0.4	0.666667	0	0	0	0	0	0	0	0	0	0	0	0	0	0	0	0	0	0
										0	0	0	0	0	0	0	-0.565217	-0.882353	0	0.846154	0.333333	-0.333333	0.354839	0.846154	0	0.777778	0	0	0	-0.4	0.666667	0	0	0	0	0	0	0	0	0	0	0	0	0	0	0.6	0	0	0
										0	0	0	0	0	0	0	-0.565217	-0.882353	0	0.857143	0.333333	-0.333333	0.354839	0.875	0	0.777778	0	0	0	-0.4	0.666667	0	0	0	0	0	0	0	0	0	0	0	0	0	0	0.6	0	0	0
										0	0	0	0	0	0	0	-0.565217	-0.882353	0	0.857143	0.333333	-0.333333	0.375	0.9	0	0.777778	0	0	0	-0.4	0.666667	0	0	0	0	0	0	0	0	0	0	0	0	0	0	0.6	0	0	0
										0	0	0	0	0	0	0	-0.565217	-0.888889	0	0.857143	0.333333	-0.333333	0.375	0.9	0	0.777778	0	0	0	-0.4	0.666667	0	0	0	0	0	0	0	0	0	0	0	0	0	0	0.6	0	0	0
										0	0	0.5	0	0	0	0	-0.565217	-0.888889	0	0.866667	0.333333	-0.333333	0.375	0.9	0	0.777778	0	0	0	-0.4	0.666667	0	0	0	0	0	0	0	0	0	0	0	0	0	0	0.6	0	0	0
										0	0	0.5	0	0	0	0	-0.565217	-0.888889	0	0.866667	0.333333	-0.333333	0.375	0.809524	0	0.777778	0	0	0	-0.4	0.666667	0	0	0	0	0	0	0	0	0	0	0	0	0	0	0.6	0	0	0
										0	0	0.5	0	0	0	0	-0.583333	-0.888889	0	0.866667	0.333333	-0.333333	0.375	0.809524	0	0.777778	0	0	0	-0.4	0.666667	0	0	0	0	0	0	0	0	0	0	0	0	0	0	0.6	0	0	0
										0	0	0.5	0	0	0	0	-0.583333	-0.888889	0	0.866667	0.333333	-0.333333	0.375	0.809524	0	0.777778	0	0	0	-0.4	0.666667	0	0	0	0	0	0	0	0	0	0	0	0	0	0	0.6	0	0	0
										0	0	0.5	0	0	0	0	-0.583333	-0.894737	0	0.866667	0.333333	-0.333333	0.375	0.809524	0	0.777778	0	0	0	-0.4	0.666667	0	0	0	0	0	0	0.5	0	0	0	0	0	0	0	0.6	0	0	0
										0	0	0.5	0	0	0	0	-0.583333	-0.894737	0	0.866667	0.333333	-0.333333	0.375	0.809524	0	0.777778	0	0	0	-0.4	0.666667	0	0	0	0	0	0	0.6	0	0	0	0	0	0	0	0.6	0	0	0
										0	0	0.5	0	0	0	0	-0.583333	-0.894737	0	0.866667	0.333333	-0.333333	0.375	0.809524	0	0.777778	0	0	0	-0.4	0.666667	0	0	0	0	0	0	0.6	0	0	0	0	0	0	0	0.6	0	0	0
										0	0	0.5	0	0	0	0	-0.583333	-0.894737	0	0.875	0.333333	-0.333333	0.375	0.809524	0	0.777778	0	0	0	-0.4	0.666667	0	0	0	0	0	0	0.6	0	0	0	0	0	0	0	0.6	0	0	0
										-0.714286	0	0.5	0	0	0	0	-0.583333	-0.894737	0	0.875	0.333333	-0.333333	0.375	0.809524	0	0.777778	0	0	0	-0.4	0.666667	0	0	0	0	0	0	0.6	0	0	0	0	0	0	0	0.6	0	0	0
										-0.714286	0	0.5	0	0	0	0	-0.583333	-0.894737	0	0.882353	0.333333	-0.333333	0.375	0.809524	0	0.777778	0	0	0	-0.4	0.666667	0	0	0	0	0	0	0.6	0	0	0	0	0	0	0	0.6	0	0	0
										-0.714286	0	0.5	0	0	0	0	-0.583333	-0.9	0	0.882353	0.333333	-0.333333	0.375	0.809524	0	0.777778	0	0	0	-0.4	0.666667	0	0	0	0	0	0	0.6	0	0	0	0	0	0	0	0.6	0	0	0
										-0.714286	0	0.5	0	0	0	0	-0.6	-0.9	0	0.882353	0.333333	-0.333333	0.375	0.809524	0	0.777778	0	0	0	-0.4	0.666667	0	0	0	0	0	0	0.6	0	0	0	0	0	0	0	0.6	0	0	0
										-0.714286	0.6	0.5	0	0	0	0	-0.6	-0.9	0	0.882353	0.333333	-0.333333	0.333333	0.809524	0	0.777778	0	0	0	-0.4	0.666667	0	0	0	0	0	0	0.6	0	0	0	0	0	0	0	0.6	0	0	0
										-0.714286	0.6	0.5	0	0	0	0	-0.6	-0.9	0	0.882353	0.333333	-0.333333	0.333333	0.809524	0	0.777778	0	0	0	-0.4	0.666667	0	0	0	0	0	0	0.6	0	0	0	0	0	0	0	0.6	0	0	0
										-0.714286	0.6	0.5	0	0	0	0	-0.6	-0.9	0	0.882353	0.333333	-0.333333	0.333333	0.809524	0	0.777778	0	0	0	-0.4	0.666667	0	0	0	0	0	0	0.6	0	0	0	0	0	0	0	0.6	0	0	0
										-0.714286	0.6	0.5	0	0	0	0	-0.6	-0.9	0	0.882353	0.333333	-0.333333	0.294118	0.809524	0	0.777778	0	0	0	-0.4	0.666667	0	-0.2	0	0	0	0	0.6	0	0	0	0	0	0	0	0.6	0	0	0
										-0.714286	0.6	0.5	0	0	0.333333	0	-0.6	-0.9	0	0.882353	0.333333	-0.333333	0.294118	0.809524	0	0.777778	0	0	0	-0.4	0.666667	0	-0.2	0	0	0	0	0.6	0	0	0	0	0	0	0	0.6	0	0	0
										-0.714286	0.6	0.5	0	0	0.333333	0	-0.6	-0.9	0	0.882353	0.333333	-0.333333	0.257143	0.809524	0	0.777778	0	0	0	-0.4	0.666667	0	-0.2	0	0	0	0	0.6	0	0	0	0	0	0	0	0.75	0	0	0
										-0.714286	0.6	0.5	0	0	0.333333	0	-0.6	-0.9	0	0.882353	0.333333	-0.333333	0.257143	0.818182	0	0.777778	0	0	0	-0.4	0.666667	0	-0.2	0	0	0	0	0.6	0	0	0	0	0	0	0	0.75	0	0.5	0
										-0.714286	0.6	0.5	0	0	0.333333	0	-0.6	-0.904762	0	0.882353	0.333333	-0.333333	0.257143	0.818182	0	0.8	0	0	0	-0.4	0.666667	0	-0.2	0	0	0	0	0.6	0	0	0	0	0	0	0	0.8	0	0.5	0
										-0.714286	0.6	0.5	0	0	0.333333	0	-0.6	-0.904762	0	0.882353	0.333333	-0.333333	0.222222	0.818182	0	0.8	0	0	0	-0.4	0.666667	0	-0.2	0	0	0	0	0.6	0	0	0	0	0	0	0	0.8	0	0.5	0
										-0.714286	0.6	0.5	0	0	0.333333	0	-0.6	-0.904762	0	0.882353	0.333333	-0.333333	0.222222	0.818182	0	0.8	0	0	0	-0.454545	0.666667	0	-0.2	0	0	0	0	0.6	0	0	0	0	0	0	0	0.8	0	0.5	0
										-0.714286	0.6	0.5	0	0	0.333333	0	-0.6	-0.904762	0	0.882353	0.333333	-0.333333	0.222222	0.818182	0	0.8	0	0	0	-0.454545	0.666667	0	-0.2	0	0	0	0	0.6	0	0	0	0	0	0	0	0.8	0	0.5	0
										-0.714286	0.6	0.5	0	0	0.333333	0	-0.6	-0.904762	0	0.882353	0.333333	-0.333333	0.222222	0.818182	0	0.8	0	0	0	-0.454545	0.666667	0	-0.2	0	0	0	0	0.6	0	0	0	0	0	0	0	0.8	0	0.5	0
										-0.714286	0.6	0.5	0	0	0.333333	0	-0.6	-0.904762	0	0.882353	0.333333	-0.333333	0.222222	0.818182	0	0.8	0	0	0	-0.454545	0.666667	0	-0.2	0	0	0	0	0.6	0	0	0	0	0	0	0	0.8	0	0.5	0
										-0.714286	0.6	0.5	0	0	0.333333	0	-0.481482	-0.904762	0	0.882353	0.333333	-0.333333	0.222222	0.818182	0	0.8	0	0	0	-0.454545	0.666667	0	0	0	0	0	0	0.6	0	0	0	0	0	0	0	0.8	0	0.5	0
										-0.714286	0.6	0.5	0	0	0.333333	0	-0.5	-0.904762	0	0.882353	0.333333	-0.333333	0.243243	0.818182	0	0.8	0	0	0	-0.454545	0.666667	0	0	0	0	0	0	0.6	0	0	0	0	0	0	0	0.8	0	0.5	0
										-0.714286	0.6	0.5	0	0	0.333333	0	-0.5	-0.909091	0	0.882353	0.333333	-0.333333	0.210526	0.818182	0	0.8	0	0	0	-0.454545	0.666667	0	0	0	0	0	0	0.6	0	0	0	0	0	0	0	0.8	0	0.5	0
										-0.714286	0.6	0.5	0	0	0.333333	0	-0.533333	-0.909091	0	0.882353	0.333333	-0.333333	0.210526	0.818182	0	0.8	0	-0.5	0	-0.454545	0.666667	0	0	0	0	0	0	0.6	0	0	0	0	0	0	0	0.8	0	0.5	0
										-0.714286	0.6	0.5	0	0	0.333333	0	-0.5625	-0.925926	0	0.882353	0.333333	-0.333333	0.179487	0.818182	0	0.8	0	-0.5	0	-0.454545	0.666667	0	0	0	0	0	0	0.6	0	0	0	0	0	0	0	0.8	0	0.5	0
										-0.714286	0.6	0.5	0	0	0.333333	0	-0.5625	-0.928571	0	0.882353	0.333333	-0.333333	0.179487	0.818182	0	0.8	0	-0.5	0	-0.454545	0.666667	0	0	0	0	0	0	0.6	0	0	0	0	0	0	0	0.8	0	0.5	0
										-0.2	0.6	0.5	0	0	0.333333	0	-0.5625	-0.928571	0	0.882353	0.333333	-0.333333	0.179487	0.818182	0	0.8	0	-0.5	0	-0.454545	0.666667	0	0	0	0	0	0	0.6	0	0	0	0	0	0	0	0.8	0	0.5	0
										-0.2	0.6	0.5	0	0	0.333333	0	-0.5625	-0.931034	0	0.882353	0.333333	-0.333333	0.2	0.818182	0	0.8	0	-0.5	0	-0.454545	0.666667	0	0	0	0	0	0	0.6	0	0	0	0	0	0	0	0.8	0	0.5	0
										-0.2	0.6	0.5	0	0	0.333333	0	-0.5625	-0.931034	0	0.882353	0.333333	-0.333333	0.2	0.818182	0	0.8	0	-0.5	0	-0.454545	0.666667	0.333333	0	0	0	0	0	0.6	0	0	0	0	0	0	0	0.8	0	0.5	0
										-0.2	0.6	0.5	0	0	0.333333	0	-0.5625	-0.933333	0	0.882353	0.333333	-0.333333	0.2	0.818182	0	0.8	0	-0.5	0	-0.454545	0.666667	0.333333	0	0	0	0	0	0.6	0	0	0	0	0	0	0	0.8	0	0.5	0
										-0.2	0.6	0.5	0	0	0.333333	0	-0.5625	-0.933333	0	0.888889	0.333333	-0.333333	0.2	0.818182	0	0.8	0	-0.5	0	-0.454545	0.666667	0.333333	0	0	0	0	0	0.6	0	0	0	0	0	0	0	0.8	0	0.5	0
										-0.2	0.6	0.5	0	0	0.333333	0	-0.5625	-0.933333	0	0.888889	0.333333	-0.333333	0.2	0.818182	0	0.8	0	-0.5	0	-0.454545	0.666667	0.333333	0	0	0	0	0	0.6	0	0	0	0	0	0	0	0.8	0	0.5	0
										-0.2	0.6	0.5	0	0	0.333333	0	-0.5625	-0.933333	0	0.894737	0.333333	-0.333333	0.2	0.818182	0	0.8	0	-0.5	0	-0.454545	0.666667	0.333333	0	0	0	0	0	0.6	0	0	0	0	0	0	0	0.8	0	0.5	0
										-0.2	0.6	0.5	0	0	0.333333	0	-0.5625	-0.933333	0	0.894737	0.333333	-0.333333	0.2	0.818182	0	0.8	0	-0.5	0	-0.454545	0.666667	0.333333	0	0	0	0	0	0.6	0	0	0	0	0	0	0	0.8	0	0.5	0
										-0.2	0.6	0.5	0	0	0.333333	0	-0.5625	-0.933333	0	0.894737	0.333333	-0.333333	0.2	0.818182	0	0.8	0	-0.5	0	-0.454545	0.666667	0.333333	0	0	0	0	0	0.6	0	0	0	0	0	0	0	0.8	0	0.5	0
										-0.2	0.6	0.5	0	0	0.333333	0	-0.5625	-0.935484	0	0.894737	0.333333	-0.333333	0.2	0.818182	0	0.8	0	-0.5	0	-0.454545	0.666667	0.333333	0	0	0	-0.5	0	0.6	0	0	0	0	0	0	0	0.8	0	0.5	0
										-0.2	0.6	0.5	0	0	0.333333	0	-0.5625	-0.935484	0	0.9	0.333333	-0.333333	0.2	0.818182	0	0.8	0	-0.5	0	-0.454545	0.666667	0.333333	0	0	0	-0.5	0	0.6	0	0	0	0	0	0	0	0.8	0	0.5	0
										-0.2	0.6	0.5	0	0	0.333333	0	-0.5625	-0.935484	0	0.9	0.333333	-0.333333	0.2	0.818182	0	0.8	0	-0.5	0	-0.454545	0.666667	0.333333	0	0	0	-0.5	0	0.6	0	0	0	0	0	0	0	0.8	0	0.2	0
										-0.2	0.6	0.5	0	0	0.333333	0	-0.5625	-0.9375	0	0.52	0.333333	-0.333333	0.2	0.818182	0	0.8	0	-0.5	0	-0.454545	0.666667	0.333333	0	0	0	-0.5	0	0.6	0	0	0	0	0	0	0	0.8	0	-0.25	0
										-0.2	0.6	0.5	0	0	0.333333	0	-0.5625	-0.9375	0	0.52	0.333333	-0.333333	0.2	0.818182	0	0.8	0	-0.5	0	-0.454545	0.666667	0.333333	0	0	0	-0.5	0	0.6	0	0	0	0	0	0	0	0.8	0	-0.25	0
										-0.2	0.6	0.5	0	0	0.333333	0	-0.5625	-0.9375	0	0.52	0.333333	-0.333333	0.2	0.818182	0	0.8	0	-0.5	0	-0.454545	0.666667	0.333333	0	0	0	-0.5	0	0.6	0	0	0	0	0	0	0	0.8	0	-0.25	0
										-0.2	0.6	0.5	0	0	0.333333	0	-0.5625	-0.9375	0	0.461539	0.333333	-0.333333	0.2	0.818182	0	0.8	0	-0.5	0	-0.454545	0.666667	0.333333	0	0	0	-0.5	0	0.6	0	0	0	0	0	0	0	0.8	0	-0.25	0
										-0.2	0.6	0.5	0	0	0.333333	0	-0.5625	-0.9375	0	0.461539	0.333333	-0.333333	0.2	0.818182	0	0.8	0	-0.5	0	-0.454545	0.666667	0.333333	0	0	0	-0.5	0	0.6	0	0	0	0	0	0	0	0.8	0	-0.25	0
										-0.2	0.6	0.5	0	0	0.333333	0	-0.575758	-0.9375	0	0.461539	0.333333	-0.333333	0.2	0.818182	0	0.8	0	-0.6	0	-0.454545	0.666667	0.333333	0	0	0	-0.5	0	0.6	0	0	0	0	0	0	0	0.8	0	-0.25	-0.2
										-0.2	0.6	0.5	0	0	0.333333	0	-0.575758	-0.9375	0	0.461539	0.333333	-0.333333	0.2	0.818182	0	0.8	0	-0.6	0	-0.454545	0.666667	0.333333	0	0	0	-0.5	0	0.6	0	0	0	0	0	0	0	0.8	0	-0.25	-0.2
										-0.2	0.6	0.5	0	0	0.333333	0	-0.575758	-0.9375	0	0.461539	0.333333	-0.333333	0.2	0.73913	0	0.8	0	-0.6	0	-0.454545	0.666667	0.333333	0	0	0	-0.5	0	0.666667	0	0	0	0	0	0	0	0.8	0	-0.25	-0.2
										-0.2	0.6	0.5	0	0	0.333333	0	-0.575758	-0.939394	0	0.461539	0.333333	-0.333333	0.2	0.73913	0	0.8	0	-0.6	0	-0.454545	0.666667	0.333333	0	0	0	-0.5	0	0.714286	0	0	0	0	0	0	0	0.8	0	-0.25	-0.2
										-0.2	0.6	0.5	0	0	0.333333	0	-0.575758	-0.939394	0	0.461539	0.333333	-0.333333	0.2	0.73913	0	0.8	0	-0.6	0	-0.454545	0.666667	0.333333	0	0	0	-0.5	0	0.714286	0	0	0	0	0	0	0	0.8	0	-0.25	-0.2
										-0.2	0.6	0.5	0	0	0.333333	0	-0.575758	-0.939394	0	0.461539	0.333333	-0.333333	0.2	0.73913	0	0.8	0	-0.6	0	-0.454545	0.666667	0.333333	0	0	0	-0.5	0	0.714286	0	0	0	0	0	0	0	0.8	0	-0.25	-0.2
										-0.2	0.6	0.5	-0.6	0	0.333333	0	-0.575758	-0.72973	0	0.461539	0.333333	-0.333333	0.2	0.73913	0	0.8	0	-0.6	0	-0.454545	0.666667	0.333333	0	0	0	-0.5	0	0.714286	0	0	0	0	0	0	0	0.8	0	-0.25	-0.2
										-0.2	0.6	0.5	-0.8	0	0.333333	0	-0.575758	-0.72973	0	0.461539	0.333333	-0.333333	0.2	0.73913	0	0.8	0	-0.6	0	-0.454545	0.666667	0.333333	0	0	0	-0.5	0	0.714286	0	0	0	0	0	0	0	0.8	0	-0.25	-0.2
										-0.2	0.6	0.5	-0.8	0	0.333333	0	-0.575758	-0.72973	0	0.461539	0.333333	-0.333333	0.2	0.73913	0	0.8	0	-0.6	0	-0.454545	0.666667	0.333333	0	0	0	-0.5	0	0.714286	0	0	0	0	0	0	0	0.8	0	-0.25	-0.2
										-0.2	0.6	0.5	-0.8	0	0.333333	0	-0.575758	-0.736842	0	0.461539	0.333333	-0.333333	0.2	0.73913	0	0.8	0	-0.6	0	-0.454545	0.666667	0.333333	0	0	0	-0.5	0	0.714286	0	0	0	0	0	0	0	0.8	0	-0.25	-0.2
										-0.2	0.6	0.5	-0.8	0	0.333333	0	-0.575758	-0.736842	0	0.461539	0.333333	-0.333333	0.2	0.73913	0	0.8	0	-0.6	0	-0.454545	0.666667	0.333333	-0.25	0	0	0.142857	0	0.714286	0	0	0	0	0	0	0	0.8	0	-0.25	-0.2
										-0.2	0.6	0.5	-0.8	0	0.333333	0	-0.575758	-0.736842	0	0.461539	0.333333	-0.333333	0.2	0.73913	0	0.8	0	-0.6	0	-0.454545	0.666667	0.333333	-0.25	0	0	0.25	0	0.714286	0	0	0	0	0	0	0	0.8	0	-0.25	-0.2
										-0.2	0.6	0.5	-0.8	0	0.333333	0	-0.575758	-0.736842	0	0.461539	0.333333	-0.333333	0.2	0.73913	0	0.8	0	-0.6	0	-0.454545	0.666667	0.333333	-0.25	0	0	0.25	0	0.714286	0	0	0	0	0	0	0	0.8	0	-0.25	-0.2
										-0.2	0.6	0.5	-0.8	0	0.333333	0	-0.575758	-0.736842	0	0.461539	0.333333	-0.333333	0.2	0.73913	0	0.8	0	-0.6	0	-0.454545	0.666667	0.333333	-0.25	0	0	0.25	0	0.714286	0	0	0	0	0	0	0	0.8	0	-0.25	-0.2
										-0.2	0.6	0.5	-0.8	0	0.333333	0	-0.588235	-0.736842	0	0.481482	0.333333	-0.333333	0.2	0.73913	0	0.8	0	-0.6	0	-0.454545	0.666667	0.333333	-0.25	0	0	0.25	0	0.714286	0	0	0	0	0	0	0	0.8	0	-0.25	-0.2
										-0.2	0.6	0.5	-0.8	0	0.333333	0	-0.6	-0.736842	0	0.5	0.333333	-0.333333	0.2	0.666667	0	0.8	0	-0.6	0	-0.454545	0.666667	0.333333	-0.25	0	0	0.25	0	0.714286	0	0	0	0	0	0	0	0.8	0	-0.25	-0.2
										-0.2	0.6	0.5	-0.8	0	0.333333	0	-0.6	-0.736842	0	0.5	0.333333	-0.333333	0.2	0.666667	0	0.8	0	-0.6	0	-0.454545	0.666667	0.333333	-0.25	0	0	0.25	0	0.714286	0	0	0	0	0	0	0	0.8	0	-0.25	-0.2
										-0.2	0.6	0.5	-0.8	0	0.333333	0	-0.6	-0.736842	0	0.5	0.333333	-0.333333	0.2	0.666667	0	0.8	0	-0.6	0	-0.454545	0.666667	0.333333	-0.25	0	0	0.25	0	0.714286	0	0	0	0	0	0	0	0.8	0	-0.25	-0.2
										-0.2	0.6	0.5	-0.8	0	0.333333	0	-0.6	-0.736842	0	0.5	0.333333	-0.333333	0.2	0.666667	0	0.8	0	-0.75	0	-0.454545	0.666667	0.333333	-0.25	0	0	0.25	0	0.714286	0	0	0	0	0	0	0	0.8	0	-0.25	-0.2
										-0.2	0.6	0.5	-0.8	0	0.333333	0	-0.6	-0.736842	0	0.5	0.333333	-0.333333	0.2	0.666667	0	0.8	0	-0.75	0	-0.454545	0.666667	0.333333	-0.25	0	0	0.25	0	0.714286	0	0	0	0	0	0	0	0.8	0	-0.25	-0.2
										-0.2	0.6	0.5	-0.8	0	0.333333	0	-0.6	-0.74359	0	0.5	0.333333	-0.333333	0.2	0.666667	0	0.8	0	-0.75	0	-0.454545	0.666667	0.333333	-0.25	0	0	0.25	0	0.714286	0	0	0	0	0	0	0	0.8	0	-0.25	-0.2
										-0.2	0.6	0.5	-0.8	0	0.333333	0	-0.6	-0.74359	0	0.5	0.333333	-0.333333	0.2	0.666667	0	0.8	0	-0.75	0	-0.454545	0.666667	0.333333	-0.25	0	0	0.25	0	0.714286	0	0	0	0	0	0	0	0.8	0	-0.25	-0.2
										-0.2	0.6	0.5	-0.8	0	0.333333	0	-0.6	-0.74359	0	0.5	0.333333	-0.333333	0.2	0.666667	0	0.8	0	-0.777778	0	-0.454545	0.666667	0.333333	-0.25	0	0	0.25	0	0.714286	0	0	0	0	0	0	0	0.8	0	-0.25	-0.2
										-0.2	0.6	0.5	-0.8	0	0.333333	0	-0.6	-0.74359	0	0.5	0.333333	-0.333333	0.0434783	0.666667	0	0.8	0	-0.777778	0	-0.454545	0.666667	0.333333	-0.25	0	0	0.25	0	0.714286	0	0	0	0	0	0	0	0.8	0	-0.25	-0.2
										-0.2	0.6	0.5	-0.8	0	0.333333	0	-0.6	-0.74359	0	0.5	0.333333	-0.333333	-0.0588235	0.666667	0	0.8	0	-0.777778	0	-0.454545	0.666667	0.333333	-0.25	0	0	0.25	0	0.714286	0	0	0	0	0	0	0	0.636364	0	-0.25	-0.2
										-0.2	0.6	0.5	-0.8	0	0.333333	0	-0.6	-0.74359	0	0.5	0.333333	-0.333333	-0.142857	0.666667	0	0.8	0	-0.777778	0	-0.454545	0.666667	0.333333	-0.25	0	0	0.25	0	0.714286	0	0	0	-0.5	0	0	0	0.636364	0	-0.25	-0.2
										-0.2	0.6	0.5	-0.8	0	0.333333	0	-0.6	-0.74359	0	0.5	0.333333	-0.333333	-0.142857	0.666667	0	0.8	0	-0.777778	0	-0.454545	0.666667	0.333333	-0.25	0	0	0.25	0	0.714286	0	0	0	-0.5	0	0	0	0.636364	0	-0.25	-0.2
										-0.2	0.6	0.5	-0.8	0	0.333333	0	-0.6	-0.74359	0	0.5	0.333333	-0.333333	-0.157895	0.666667	0	0.8	0	-0.777778	0	-0.454545	0.666667	0.333333	-0.25	0	0	0.25	0	0.714286	0	0	0	-0.5	0	0	0	0.636364	0	-0.25	-0.2
										-0.2	0.6	0.5	-0.8	0	0.333333	0	-0.6	-0.74359	0	0.5	0.333333	-0.333333	-0.157895	0.666667	0	0.8	0	-0.777778	0	-0.454545	0.666667	0.333333	-0.25	0	0	0.25	0	0.714286	0	0	0	-0.5	0	0	0	0.636364	0	-0.25	-0.2
										-0.2	0.6	0.5	-0.8	0	0.333333	0	-0.6	-0.74359	0	0.5	0.333333	-0.333333	-0.157895	0.666667	0	0.8	0	-0.777778	0	-0.454545	0.666667	0.333333	-0.25	0	0	0.25	-0.333333	0.714286	0	0	0	-0.5	0	0	0	0.636364	0	-0.25	-0.2
										-0.2	0.6	0.5	-0.8	0	0.333333	0	-0.6	-0.74359	0	0.5	0.333333	-0.333333	-0.172414	0.666667	0	0.8	0	-0.777778	0	-0.454545	0.666667	0.333333	-0.25	0	0	0.25	-0.333333	0.714286	0	0	0	-0.5	0	0	0	0.636364	0	-0.25	-0.2
										-0.2	0.6	0.5	-0.8	0	0.333333	0	-0.6	-0.74359	0	0.5	0.333333	-0.333333	-0.172414	0.666667	0	0.8	0	-0.777778	0	-0.454545	0.666667	0.333333	-0.25	0	0	0.25	-0.333333	0.714286	0	0	0	-0.5	0	0	0	0.636364	0	-0.25	-0.2
										-0.2	0.6	0.5	-0.8	0	0.333333	0	-0.6	-0.74359	0	0.5	0.333333	-0.333333	-0.186441	0.666667	0	0.8	0	-0.777778	0	-0.454545	0.666667	0.333333	-0.25	0	0	0.25	-0.333333	0.714286	0	0	0	-0.5	0	0	0	0.636364	0	-0.25	-0.2
										-0.2	0.6	0.5	-0.8	0	0.333333	0	-0.6	-0.74359	0	0.5	0.333333	-0.333333	-0.186441	0.666667	0	0.8	0	-0.777778	0	-0.454545	0.666667	0.333333	-0.25	0	0	0.25	-0.333333	0.714286	0.333333	0	0	-0.5	0	0	0	0.636364	0	-0.25	-0.2
										-0.2	0.6	0.5	-0.8	0	0.333333	0	-0.6	-0.74359	0	0.5	0.333333	-0.333333	-0.186441	0.666667	0	0.8	0	-0.777778	0	-0.454545	0.666667	0.333333	-0.25	0	0	0.25	-0.333333	0.714286	0.333333	0	0	-0.5	0	0	0	0.636364	0	-0.25	-0.2
										-0.2	0.6	0.5	-0.8	0	0.333333	0	-0.6	-0.74359	0	0.5	0.333333	-0.333333	-0.186441	0.666667	0	0.8	0	-0.777778	0	-0.454545	0.666667	0.333333	-0.25	0	0	0.25	-0.333333	0.714286	0.333333	0	0	-0.5	0	0	0	0.636364	0	-0.25	-0.2
										-0.2	0.6	0.5	-0.8	0	0.333333	0	-0.6	-0.74359	0.333333	0.5	0.333333	-0.333333	-0.186441	0.666667	0	0.8	0	-0.777778	0	-0.454545	0.666667	0.333333	-0.25	0	0	0.25	-0.333333	0.714286	0.333333	0	-0.333333	-0.5	0	0	0	0.636364	0	-0.25	-0.2
										-0.2	0.6	0.5	-0.8	0	0.333333	0	-0.6	-0.74359	0.333333	0.5	0.333333	-0.333333	-0.186441	0.666667	0	0.8	0	-0.777778	0	-0.454545	0.666667	0.333333	-0.25	0	0	0.25	-0.333333	0.714286	0.333333	0	-0.333333	-0.5	0	0	0	0.636364	0	-0.25	-0.2
										-0.2	0.6	0.5	-0.8	0	0.333333	0	-0.6	-0.74359	0.333333	0.5	0.333333	-0.333333	-0.186441	0.666667	0	0.8	0	-0.777778	0	-0.454545	0.666667	0.333333	-0.25	0	0	0.25	-0.333333	0.714286	0.333333	0	-0.333333	-0.5	0	0	0	0.636364	0	-0.25	-0.2
										-0.2	0.6	0.5	-0.8	0	0.333333	0	-0.6	-0.74359	0.333333	0.5	0.333333	-0.333333	-0.186441	0.666667	0	0.8	0	-0.777778	0	-0.454545	0.666667	0.333333	-0.25	0	0	0.25	-0.333333	0.714286	0.333333	0	-0.333333	-0.5	0	0	0	0.636364	0	-0.25	-0.2
										-0.2	0.6	0.5	-0.8	0	0.333333	0	-0.6	-0.74359	0.333333	0.5	0.333333	-0.333333	-0.186441	0.666667	0	0.8	0	-0.8	0	-0.454545	0.666667	0.333333	-0.25	0	0	0.25	-0.333333	0.714286	0.333333	0	-0.333333	-0.5	0	0	0	0.636364	0	-0.25	-0.2
										-0.2	0.6	0.5	-0.8	0	0.333333	0	-0.6	-0.74359	0.333333	0.5	0.333333	-0.333333	-0.186441	0.666667	0	0.8	0	-0.8	0.5	-0.454545	0.666667	0.333333	-0.25	0	0	0.25	-0.333333	0.714286	0.333333	0	-0.333333	-0.5	-0.75	0	0	0.636364	0	-0.25	-0.2
										-0.2	0.6	0.5	-0.8	0	0.333333	0	-0.6	-0.74359	0.333333	0.5	0.333333	-0.333333	-0.186441	0.666667	0	0.8	-0.333333	-0.8	0.5	-0.454545	0.666667	0.333333	-0.25	0	0	0.25	-0.333333	0.714286	0.333333	0	-0.333333	-0.5	-0.777778	0	0	0.636364	0	-0.25	-0.2
										-0.2	0.6	0.5	-0.8	0	0.333333	0	-0.6	-0.74359	0.333333	0.5	0.333333	-0.333333	-0.186441	0.666667	0	0.8	-0.333333	-0.8	0.5	-0.454545	0.666667	0.333333	-0.25	0	0	0.25	-0.333333	0.714286	0.333333	0	-0.333333	-0.5	-0.777778	0	0	0.636364	0	-0.25	-0.2
										-0.2	0.6	0.5	-0.8	0	0.333333	0	-0.6	-0.74359	0.333333	0.5	0.333333	-0.333333	-0.186441	0.666667	0	0.8	-0.333333	-0.8	0.5	-0.454545	0.666667	0.333333	-0.25	0	0	0.25	-0.333333	0.714286	0.333333	0	-0.333333	-0.5	-0.777778	0	0	0.636364	0	-0.25	-0.2
										-0.2	0.6	0.5	-0.8	0	0.333333	0	-0.6	-0.74359	0.333333	0.5	0.333333	-0.333333	-0.186441	0.666667	0	0.8	-0.333333	-0.8	0.5	-0.454545	0.666667	0.333333	-0.111111	0	0	0.25	-0.333333	0.714286	0.333333	0	-0.333333	-0.5	-0.777778	0	0	0.636364	0	-0.25	-0.2
										-0.2	0.6	0.5	-0.8	0	0.333333	0	-0.6	-0.75	0.333333	0.5	0.333333	-0.333333	-0.186441	0.733333	0	0.8	-0.5	-0.8	0.5	-0.454545	0.666667	0.333333	-0.111111	0	0	0.25	-0.333333	0.714286	0.333333	0	-0.333333	-0.5	-0.777778	0	0	0.636364	0	-0.25	-0.2
										-0.2	0.6	0.5	-0.8	0	0.333333	0	-0.6	-0.756098	0.333333	0.5	0.333333	-0.333333	-0.186441	0.777778	0	0.8	-0.714286	-0.8	0.5	-0.454545	0.666667	0.333333	-0.111111	0	0	0.25	-0.333333	0.714286	0.333333	0	-0.333333	-0.5	-0.777778	0	0	0.636364	0	-0.25	-0.2
										-0.2	0.6	0.5	-0.8	0	0.5	0	-0.6	-0.756098	0.333333	0.5	0.333333	-0.333333	-0.186441	0.783784	0	0.8	-0.714286	-0.8	0.5	-0.454545	0.666667	0.333333	-0.111111	0	0	0.25	-0.333333	0.714286	0.333333	0	-0.333333	-0.5	-0.777778	0	0	0.636364	0	-0.25	-0.2
										-0.2	0.6	0.5	-0.8	0	0.5	0	-0.6	-0.756098	0.333333	0.5	0.333333	-0.333333	-0.186441	0.783784	0	0.8	-0.714286	-0.8	0.5	-0.454545	0.666667	0.333333	-0.111111	0	0	0.25	-0.333333	0.714286	0.333333	0	-0.333333	-0.5	-0.777778	0	0	0.636364	0	-0.25	-0.2
										-0.2	0.6	0.5	-0.8	0	0.5	0	-0.6	-0.756098	0.333333	0.5	0.333333	-0.333333	-0.186441	0.783784	0	0.8	-0.714286	-0.8	0.5	-0.454545	0.666667	0.333333	-0.111111	0	0	0.25	-0.333333	0.714286	0.333333	0	-0.333333	-0.5	-0.8	0	0	0.636364	0	-0.25	-0.2
										-0.2	0.6	0.5	-0.8	0	0.5	0	-0.6	-0.756098	0.333333	0.5	0.333333	-0.333333	-0.186441	0.783784	0	0.8	-0.714286	-0.8	0.5	-0.454545	0.666667	0.333333	-0.111111	0	0	0.25	-0.333333	0.714286	0.333333	0	-0.333333	-0.5	-0.818182	0	0	0.636364	0	-0.25	-0.2
										-0.2	0.6	0.5	-0.8	0	0.5	0	-0.6	-0.756098	0.333333	0.5	0.333333	-0.333333	-0.186441	0.783784	0	0.8	-0.714286	-0.8	0.5	-0.454545	0.666667	0.333333	-0.111111	0	0	0.25	-0.333333	0.714286	0.333333	0	-0.333333	-0.5	-0.875	0	0	0.636364	0	-0.25	-0.2
										-0.2	0.6	0.5	-0.8	0	0.5	0	-0.6	-0.756098	0.333333	0.5	0.333333	-0.333333	-0.186441	0.783784	0	0.8	-0.714286	-0.8	0.5	-0.454545	0.666667	0.333333	-0.111111	0	0	0.25	-0.333333	0.714286	0.333333	0	-0.333333	-0.5	-0.875	0	0	0.636364	0	-0.25	-0.2
										-0.2	0.6	0.5	-0.8	0	0.5	0	-0.6	-0.756098	0.333333	0.5	0.333333	-0.333333	-0.186441	0.783784	0	0.8	-0.714286	-0.8	0.5	-0.454545	0.666667	0.333333	-0.111111	0	0	0.25	-0.333333	0.714286	0.333333	0	-0.333333	-0.5	-0.875	0	0	0.636364	0	-0.25	-0.2
										-0.2	0.6	0.5	-0.8	0	0.5	0.6	-0.6	-0.756098	0.333333	0.5	0.333333	-0.333333	-0.186441	0.783784	0	0.8	-0.714286	-0.8	0.5	-0.454545	0.666667	0	-0.111111	0	0	0.25	-0.333333	0.714286	0.333333	0	-0.333333	-0.5	-0.875	0	0	0.636364	0	-0.25	-0.2
										-0.2	0.6	0.5	-0.8	0	0.5	0.6	-0.6	-0.756098	0.333333	0.5	0.333333	-0.333333	-0.186441	0.783784	0	0.8	-0.714286	-0.8	0.5	-0.454545	0.666667	0	-0.111111	0	0	0.25	-0.333333	0.714286	0.333333	0	-0.333333	-0.5	-0.875	0	0	0.636364	0	-0.25	-0.2
										-0.2	0.6	0.5	-0.8	0	0.5	0.6	-0.6	-0.756098	0.333333	0.5	0.333333	-0.333333	-0.186441	0.783784	0	0.8	-0.714286	-0.8	0.5	-0.454545	0.666667	0	-0.111111	0	0	0.25	-0.333333	0.714286	0.333333	0	-0.333333	-0.5	-0.875	0	0	0.636364	0	-0.25	-0.2
										-0.2	0.6	0.5	-0.8	0	0.5	0.6	-0.6	-0.756098	0.333333	0.5	0.333333	-0.333333	-0.186441	0.789474	0	0.8	-0.714286	-0.8	0.5	-0.454545	0.666667	0	-0.111111	0	0	0.25	-0.333333	0.714286	0.333333	0	-0.333333	-0.5	-0.875	0	0	0.636364	0	-0.25	-0.2
										-0.2	0.6	0.5	-0.8	0	0.5	0.6	-0.6	-0.756098	0.333333	0.5	0.333333	-0.333333	-0.186441	0.789474	0	0.8	-0.714286	-0.8	0.5	-0.454545	0.666667	0	-0.111111	0	0	0.25	-0.333333	0.714286	0.333333	0	-0.333333	-0.5	-0.875	0	0	0.636364	0	-0.4	-0.2
										-0.2	0.6	0.5	-0.8	0	0.5	0.6	-0.6	-0.756098	0.333333	0.5	0.333333	-0.333333	-0.186441	0.789474	0	0.8	-0.714286	-0.8	0.5	-0.454545	0.666667	0	-0.111111	0	0	0.25	-0.333333	0.714286	0.333333	0	-0.333333	-0.5	-0.875	0	0	0.636364	0	-0.4	-0.2
										-0.2	0.6	0.5	-0.8	0	0.5	0.6	-0.6	-0.756098	0.333333	0.5	0.333333	-0.333333	-0.213115	0.789474	0	0.8	-0.714286	-0.8	0.5	-0.454545	0.666667	0	-0.111111	0	0	0.25	-0.333333	0.714286	0.333333	0	-0.333333	-0.5	-0.875	0	0	0.636364	0	-0.4	-0.2
										-0.2	0.6	0.5	-0.8	0	0.5	0.6	-0.6	-0.756098	0.333333	0.5	0.333333	-0.333333	-0.213115	0.789474	0	0.8	-0.714286	-0.8	0.5	-0.454545	0.666667	0	-0.111111	0	0	0.25	-0.333333	0.714286	0.333333	0	-0.333333	-0.5	-0.875	0	0	0.636364	0	-0.4	-0.2
										-0.2	0.6	0.5	-0.8	0	0.5	0.6	-0.6	-0.756098	0.333333	0.5	0.333333	-0.333333	-0.213115	0.789474	0	0.8	-0.714286	-0.8	0.5	-0.454545	0.666667	0	-0.111111	0	0	0.25	-0.333333	0.714286	0.333333	0	-0.333333	-0.5	-0.875	0	0	0.636364	0	-0.4	-0.2
										-0.2	0.6	0.5	-0.8	0	0.5	0.6	-0.6	-0.756098	0.333333	0.448276	0.333333	-0.333333	-0.213115	0.789474	0	0.8	-0.714286	-0.8	0.5	-0.454545	0.666667	0	-0.111111	0	0	0.25	-0.333333	0.714286	0.333333	0	-0.333333	-0.5	-0.875	0	0	0.636364	0	-0.4	-0.2
										-0.2	0.6	0.5	-0.8	0	0.5	0.6	-0.6	-0.756098	0.333333	0.448276	0.333333	-0.333333	-0.213115	0.789474	0	0.8	-0.714286	-0.8	0.5	-0.454545	0.666667	0	-0.111111	0	0	0.25	-0.333333	0.714286	0.333333	0	-0.333333	-0.5	-0.875	0	0	0.636364	0	-0.4	-0.2
										-0.2	0.6	0.5	-0.8	0	0.5	0.6	-0.6	-0.756098	0.333333	0.448276	0.333333	-0.333333	-0.213115	0.789474	0	0.8	-0.714286	-0.8	0.5	-0.454545	0.666667	0	-0.111111	0	0	0.25	-0.333333	0.714286	0.333333	0	-0.333333	-0.5	-0.875	0	0	0.636364	0	-0.4	-0.2
										-0.2	0.6	0.5	-0.8	0	0.5	0.6	-0.6	-0.756098	0.333333	0.448276	0.333333	-0.333333	-0.213115	0.789474	0	0.8	-0.714286	-0.8	0.5	-0.454545	0.666667	0	-0.111111	0	0	0.25	-0.333333	0.714286	0.333333	0	-0.333333	-0.5	-0.875	0	0	0.636364	0	-0.4	-0.2
										-0.2	0.6	0.5	-0.8	0	0.5	0.6	-0.6	-0.756098	0.333333	0.448276	0.333333	-0.333333	-0.213115	0.789474	0	0.818182	-0.714286	-0.8	0.5	-0.454545	0.666667	0	-0.111111	0	0	0.25	-0.333333	0.714286	0.333333	0	-0.333333	-0.5	-0.875	0	0	0.636364	0	-0.4	-0.2
										-0.2	0.6	0.5	-0.8	0	0.5	0.6	-0.6	-0.761905	0.333333	0.448276	0.333333	-0.333333	-0.213115	0.789474	0	0.818182	-0.714286	-0.8	0.5	-0.454545	0.666667	0	-0.111111	0	0	0.25	-0.333333	0.714286	0.333333	0	-0.333333	-0.5	-0.875	0	0	0.636364	0	-0.4	-0.2
										-0.2	0.6	0.5	-0.8	0	0.5	0.6	-0.6	-0.761905	0.333333	0.448276	0.333333	-0.333333	-0.213115	0.789474	0	0.818182	-0.714286	-0.8	0.5	-0.454545	0.666667	0	-0.111111	0	0	0.25	-0.333333	0.714286	0.333333	0	-0.333333	-0.5	-0.875	0	0	0.636364	0	-0.4	-0.2
										-0.2	0.6	0.5	-0.8	0	0.5	0.6	-0.6	-0.761905	0.333333	0.448276	0.333333	-0.333333	-0.213115	0.789474	0	0.818182	-0.714286	-0.8	0.5	-0.454545	0.666667	0	-0.111111	0	0	0.25	-0.333333	0.714286	0.333333	0	-0.333333	-0.5	-0.875	0	0	0.636364	0	-0.4	-0.2
										-0.2	0.6	0.5	-0.8	0	0.5	0.6	-0.6	-0.761905	0.333333	0.448276	0.333333	-0.333333	-0.213115	0.789474	0	0.818182	-0.714286	-0.8	0.5	-0.454545	0.666667	0	-0.111111	0	0	0.25	-0.333333	0.714286	0.333333	0	-0.333333	-0.5	-0.875	0	0	0.636364	0	-0.4	-0.2
										-0.2	0.6	0.5	-0.8	0	0.5	0.6	-0.6	-0.761905	0.333333	0.448276	0.333333	-0.333333	-0.213115	0.789474	0	0.818182	-0.714286	-0.8	0.5	-0.454545	0.666667	0	-0.111111	0	0	0.25	-0.333333	0.714286	0.333333	0	-0.333333	-0.5	-0.875	0	0	0.636364	0	-0.4	-0.2
										-0.2	0.6	0.5	-0.8	0	0.5	0.6	-0.6	-0.761905	0.333333	0.448276	0.333333	-0.333333	-0.213115	0.789474	0	0.818182	-0.714286	-0.8	0.5	-0.454545	0.666667	0	-0.111111	0	0	0.25	-0.333333	0.714286	0.333333	0	-0.333333	-0.5	-0.888889	0	0	0.636364	0	-0.4	-0.2
										-0.2	0.6	0.5	-0.8	0	0.5	0.6	-0.6	-0.761905	0.333333	0.448276	0.333333	-0.333333	-0.213115	0.789474	0	0.818182	-0.714286	-0.8	0.5	-0.454545	0.666667	0	-0.111111	0	0	0.25	-0.333333	0.714286	0.333333	0	-0.333333	-0.5	-0.789474	0	0	0.636364	0	-0.4	-0.2
										-0.2	0.6	0.5	-0.8	0	0.5	0.6	-0.6	-0.761905	0.333333	0.448276	0.333333	-0.333333	-0.213115	0.789474	0	0.818182	-0.714286	-0.8	0.5	-0.454545	0.666667	0	-0.111111	0	0	0.25	-0.333333	0.714286	0.333333	0	-0.333333	-0.5	-0.36	0	0	0.666667	0	-0.4	-0.2
										-0.2	0.6	0.5	-0.8	0	0.5	0.6	-0.6	-0.761905	0.333333	0.448276	0.333333	-0.333333	-0.213115	0.789474	0	0.818182	-0.714286	-0.8	0.5	-0.454545	0.666667	0	-0.111111	0	0	0.25	-0.333333	0.714286	0.333333	0	-0.333333	-0.5	-0.36	0	0.6	0.666667	0	-0.4	-0.2
										-0.2	0.6	0.5	-0.8	0	0.5	0.6	-0.6	-0.761905	0.333333	0.448276	0.333333	-0.333333	-0.213115	0.789474	0	0.818182	-0.714286	-0.8	0.5	-0.454545	0.666667	0	-0.111111	0	0	0.25	-0.333333	0.714286	0.333333	0	-0.333333	-0.5	-0.36	0	0.75	0.666667	0	-0.4	-0.2
										-0.2	0.6	0.5	-0.8	0	0.5	0.6	-0.6	-0.761905	0.333333	0.448276	0.333333	-0.333333	-0.213115	0.789474	0	0.818182	-0.714286	-0.8	0.5	-0.454545	0.666667	0	-0.111111	0	0	0.25	-0.333333	0.714286	0.333333	0	-0.333333	-0.5	-0.36	0	0.4	0.692308	0	-0.4	-0.2
										-0.2	0.6	0.5	-0.8	0	0.5	0.6	-0.6	-0.761905	0.333333	0.448276	0.333333	-0.333333	-0.213115	0.789474	0	0.818182	-0.714286	-0.8	0.5	-0.454545	0.666667	0	-0.111111	0	0	0.25	-0.333333	0.714286	0.333333	0	-0.333333	-0.5	-0.36	0	0.4	0.692308	0	-0.4	-0.2
										-0.2	0.6	0.5	-0.8	0	0.5	0.6	-0.6	-0.761905	0.333333	0.448276	0.333333	-0.333333	-0.213115	0.789474	0	0.818182	-0.714286	-0.8	0.5	-0.454545	0.666667	0	-0.111111	0	0	0.25	-0.333333	0.714286	0.333333	0	-0.333333	-0.5	-0.36	0	0.4	0.692308	0	-0.4	-0.2
										-0.2	0.6	0.5	-0.8	0	0.5	0.6	-0.6	-0.761905	0.333333	0.448276	0.333333	-0.333333	-0.213115	0.809524	0	0.818182	-0.714286	-0.8	0.5	-0.454545	0.666667	0	-0.111111	0	0	0.25	-0.333333	0.714286	0.333333	0	-0.333333	-0.5	-0.36	0	0.4	0.714286	0	-0.4	-0.2
										-0.2	0.6	0.5	-0.8	0	0.5	0.666667	-0.6	-0.767442	0.333333	0.448276	0.333333	-0.333333	-0.213115	0.813953	0	0.818182	-0.714286	-0.8	0.5	-0.454545	0.666667	0	-0.111111	0	0	0.25	-0.333333	0.714286	0.333333	0	-0.333333	-0.5	-0.36	0	0.4	0.714286	0	-0.4	-0.2
										-0.2	0.6	0.5	-0.8	0	0.5	0.666667	-0.6	-0.767442	0.333333	0.448276	0.333333	-0.333333	-0.213115	0.813953	0	0.818182	-0.714286	-0.8	0.5	-0.454545	0.666667	0	-0.111111	0	0	0.25	-0.333333	0.714286	0.333333	0	-0.333333	-0.5	-0.36	0	0.4	0.714286	0	-0.4	-0.2
										-0.2	0.6	0.5	-0.8	0	0.5	0.666667	-0.6	-0.767442	0.333333	0.448276	0.333333	-0.333333	-0.213115	0.813953	0	0.818182	-0.714286	-0.8	0.5	-0.454545	0.666667	0	-0.111111	0	0	0.25	-0.333333	0.714286	0.333333	0	-0.333333	-0.5	-0.36	0	0.4	0.714286	0	-0.4	-0.2
										-0.2	0.6	0.5	-0.8	0	0.5	0.666667	-0.6	-0.767442	0.333333	0.448276	0.333333	-0.333333	-0.213115	0.813953	0	0.818182	-0.714286	-0.8	0.5	-0.454545	0.666667	0	-0.111111	0	0	0.25	-0.333333	0.714286	0.333333	0	-0.333333	-0.5	-0.36	0	0.4	0.714286	0	-0.4	-0.2
										-0.2	0.6	0.5	-0.8	0	0.5	0.666667	-0.6	-0.767442	0.333333	0.448276	0.333333	-0.333333	-0.213115	0.813953	0	0.818182	-0.714286	-0.8	0.5	-0.454545	0.666667	0	-0.111111	0	0	0.25	-0.333333	0.714286	0.333333	0	-0.333333	-0.5	-0.36	0	0.4	0.714286	0	-0.4	-0.2
										-0.2	0.6	0.5	-0.8	0	0.5	0.666667	-0.6	-0.767442	0.333333	0.419355	0.333333	-0.333333	-0.213115	0.813953	0	0.818182	-0.714286	-0.8	0.5	-0.454545	0.666667	0	-0.111111	0	0	0.25	-0.333333	0.714286	0.333333	0	-0.333333	-0.5	-0.36	0	0.4	0.714286	0	-0.4	-0.2
										-0.2	0.6	0.5	-0.8	0	0.5	0.666667	-0.6	-0.767442	0.333333	0.419355	0.333333	-0.333333	-0.213115	0.813953	0	0.818182	-0.714286	-0.8	0.5	-0.454545	0.666667	0	-0.111111	0	0	0.25	-0.333333	0.714286	0.333333	0	-0.333333	-0.5	-0.36	0	0.4	0.714286	0	-0.4	-0.2
										-0.2	0.6	0.5	-0.384615	0	0.5	0.666667	-0.6	-0.767442	0.333333	0.419355	0.333333	-0.333333	-0.213115	0.813953	0	0.818182	-0.714286	-0.8	0.5	-0.454545	0.666667	0	-0.111111	0	0	0.25	-0.333333	0.714286	0.333333	0	-0.333333	-0.5	-0.36	0	0.4	0.714286	0	-0.4	-0.2
										-0.2	0.6	0.5	0.181818	0	0.5	0.666667	-0.6	-0.767442	0.333333	0.419355	0.333333	-0.333333	-0.213115	0.813953	0	0.818182	-0.714286	-0.8	0.5	-0.454545	0.666667	0	-0.111111	0	0	0.25	-0.333333	0.714286	0.333333	0	-0.333333	-0.5	-0.36	0	0.4	0.714286	0	-0.4	-0.2
										-0.2	0.6	0.5	0.181818	0	0.5	0.666667	-0.6	-0.772727	0.333333	0.419355	0.333333	-0.333333	-0.213115	0.813953	0	0.818182	-0.714286	-0.8	0.5	-0.454545	0.666667	0	-0.111111	0	0	0.25	-0.333333	0.714286	0.333333	0	-0.333333	-0.5	-0.36	0	0.4	0.714286	0	-0.4	-0.2
										-0.2	0.6	0.5	0.217391	0	0.5	0.666667	-0.6	-0.772727	0.333333	0.419355	0.333333	-0.333333	-0.213115	0.813953	0	0.818182	-0.714286	0.0526316	0.5	-0.454545	0.666667	0	-0.111111	0	0	0.25	-0.333333	0.714286	0.333333	0	-0.333333	-0.5	-0.36	0	0.4	0.714286	0	-0.4	-0.2
										-0.2	0.6	0.5	0.217391	0	0.5	0.666667	-0.6	-0.772727	0.333333	0.419355	0.333333	-0.333333	-0.213115	0.813953	0	0.818182	-0.714286	0.1	0.5	-0.454545	0.666667	0	-0.111111	0	0	0.25	-0.333333	0.714286	0.333333	0	-0.333333	-0.5	-0.36	0	0.4	0.714286	0	-0.4	-0.2
										-0.2	0.6	0.5	0.217391	0	0.5	0.666667	-0.6	-0.772727	0.333333	0.419355	0.333333	-0.333333	-0.213115	0.659574	0	0.818182	-0.714286	0.1	0.5	-0.454545	0.666667	0	-0.111111	0	0	0.25	-0.333333	0.714286	0.333333	0	-0.333333	-0.5	-0.36	0	0.4	0.714286	0	-0.4	-0.2
										-0.2	0.714286	0.5	0.217391	0	0.5	0.666667	-0.6	-0.772727	0.333333	0.419355	0.333333	-0.333333	-0.213115	0.529412	0	0.818182	-0.714286	0.142857	0.5	-0.454545	0.666667	0	-0.111111	0	0	0.25	-0.333333	0.714286	0.333333	0	-0.333333	-0.5	-0.36	0	0.4	0.714286	0	-0.4	-0.2
										-0.2	0.818182	0.5	0.217391	0	0.5	0.666667	-0.6	-0.772727	0.333333	0.419355	0.333333	-0.333333	-0.213115	0.529412	0	0.818182	-0.714286	0.142857	0.5	-0.454545	0.666667	0	-0.111111	0	0	0.25	-0.333333	0.714286	0.333333	0	-0.333333	-0.5	-0.36	0	0.4	0.714286	0	-0.4	-0.2
										-0.2	0.857143	0.5	0.217391	0	0.5	0.666667	-0.6	-0.772727	0.333333	0.419355	0.333333	-0.333333	-0.213115	0.529412	0	0.818182	-0.714286	0.142857	0.5	-0.454545	0.666667	0	-0.111111	0	0	0.25	-0.333333	0.714286	0.333333	0	-0.333333	-0.5	-0.36	0	0.4	0.714286	0	-0.4	-0.2
										-0.2	0.866667	0.5	0.217391	0	0.5	0.666667	-0.6	-0.772727	0.333333	0.419355	0.333333	-0.333333	-0.213115	0.529412	0	0.818182	-0.714286	0.142857	0.5	-0.454545	0.666667	0	-0.111111	0	0	0.25	-0.333333	0.714286	0.333333	0	-0.333333	-0.5	-0.36	0	0.4	0.714286	0	-0.4	-0.2
										-0.2	0.866667	0.5	0.217391	0	0.5	0.666667	-0.6	-0.772727	0.333333	0.419355	0.333333	-0.333333	-0.213115	0.529412	0	0.833333	-0.714286	0.142857	0.2	-0.454545	0.666667	0	-0.111111	0	0	0.25	-0.333333	0.714286	0.333333	0	-0.333333	-0.5	-0.36	0	0.4	0.714286	0	-0.4	-0.2
										-0.2	0.866667	0.5	0.217391	0	0.5	0.666667	-0.6	-0.772727	0.333333	0.419355	0.333333	-0.333333	-0.213115	0.538462	0	0.833333	-0.714286	0.142857	-0.142857	-0.454545	0.666667	0	-0.111111	0	0	0.25	-0.333333	0.714286	0.333333	0	-0.333333	-0.5	-0.36	0	0.4	0.714286	0	-0.4	-0.2
										-0.2	0.866667	0.5	0.217391	0	0.5	0.666667	-0.6	-0.772727	0.333333	0.419355	0.333333	-0.333333	-0.213115	0.538462	0	0.833333	-0.714286	0.142857	-0.142857	-0.454545	0.666667	0	-0.111111	0	0	0.25	-0.333333	0.714286	0.333333	0	-0.333333	-0.5	-0.36	0	0.4	0.714286	0	-0.4	-0.2
										-0.2	0.866667	0.5	0.217391	0	0.5	0.666667	-0.6	-0.772727	0.333333	0.419355	0.333333	-0.333333	-0.213115	0.538462	0	0.833333	-0.714286	0.142857	-0.142857	-0.454545	0.666667	0	-0.111111	0	0	0.25	-0.333333	0.714286	0.333333	0	-0.333333	-0.5	-0.36	0	0.4	0.714286	0	-0.4	-0.2
										-0.2	0.866667	0.5	0.217391	0	0.5	0.666667	-0.6	-0.772727	0.333333	0.419355	0.333333	-0.333333	-0.213115	0.538462	0	0.833333	-0.714286	0.142857	-0.142857	-0.454545	0.666667	0	-0.111111	0	0	0.25	-0.333333	0.714286	0.333333	0	-0.333333	-0.5	-0.36	0	0.4	0.714286	0	-0.4	-0.2
										-0.2	0.866667	0.5	0.217391	0	0.5	0.666667	-0.6	-0.772727	0.333333	0.419355	0.333333	-0.333333	-0.213115	0.538462	0	0.833333	-0.714286	0.142857	-0.142857	-0.454545	0.666667	0	-0.111111	0	0	0.25	-0.333333	0.714286	0.333333	0	-0.333333	-0.5	-0.36	0	0.4	0.714286	0	-0.4	-0.2
										-0.2	0.866667	0.5	0.217391	0	0.5	0.666667	-0.6	-0.772727	0.333333	0.419355	0.333333	-0.333333	-0.213115	0.538462	0	0.833333	-0.714286	0.142857	-0.142857	-0.454545	0.666667	0	-0.111111	0	0	0.25	-0.333333	0.714286	0.333333	0	-0.333333	-0.5	-0.36	0	0.4	0.714286	0	-0.4	-0.2
										-0.2	0.866667	0.5	0.217391	0	0.5	0.666667	-0.6	-0.772727	0.333333	0.419355	0.333333	-0.333333	-0.213115	0.538462	0	0.833333	-0.714286	0.142857	-0.142857	-0.454545	0.666667	0	-0.111111	0	0	0.25	-0.333333	0.714286	0.333333	0	-0.333333	-0.5	-0.36	0	0.4	0.714286	0	-0.4	-0.2
										-0.2	0.866667	0.5	0.217391	0	0.5	0.666667	-0.6	-0.772727	0.333333	0.485714	0.333333	-0.333333	-0.213115	0.538462	0	0.833333	-0.714286	0.142857	-0.142857	-0.454545	0.666667	0	-0.111111	0	0	0.25	-0.333333	0.714286	0.333333	0	-0.333333	-0.5	-0.36	0	0.4	0.714286	0	-0.4	-0.2
										-0.2	0.866667	0.5	0.217391	0	0.5	0.666667	-0.6	-0.772727	0.333333	0.526316	0.333333	-0.333333	-0.213115	0.538462	0	0.833333	-0.714286	0.142857	-0.142857	-0.454545	0.666667	0	-0.111111	0	0	0.25	-0.333333	0.714286	0.333333	0	-0.333333	-0.5	-0.36	0	0.4	0.714286	0	-0.4	-0.2
										-0.2	0.866667	0.5	0.217391	0	0.5	0.666667	-0.6	-0.772727	0.333333	0.590909	0.333333	-0.333333	-0.213115	0.538462	0	0.833333	-0.714286	0.142857	-0.142857	-0.454545	0.666667	0	-0.111111	0	0	0.25	-0.5	0.714286	0.333333	0	-0.333333	-0.5	-0.36	0	0.4	0.714286	0	-0.4	-0.2
										-0.2	0.866667	0.5	0.217391	0	0.5	0.666667	-0.6	-0.772727	0.333333	0.617021	0.333333	-0.333333	-0.213115	0.538462	0	0.833333	-0.714286	0.142857	-0.142857	-0.454545	0.666667	0	-0.111111	0	0	0.25	-0.5	0.714286	0.333333	0	-0.333333	-0.5	-0.36	0	0.4	0.714286	0	-0.4	-0.2
										-0.2	0.866667	0.5	0.217391	0	0.5	0.666667	-0.6	-0.772727	0.333333	0.617021	0.333333	-0.333333	-0.213115	0.538462	0	0.833333	-0.714286	0.142857	-0.142857	-0.454545	0.666667	0	-0.111111	0	0	0.25	-0.5	0.714286	0.333333	0	-0.333333	-0.5	-0.36	0	0.4	0.714286	0	-0.4	-0.2
										-0.2	0.866667	0.5	0.217391	0	0.5	0.666667	-0.6	-0.772727	0.333333	0.617021	0.333333	-0.333333	-0.213115	0.538462	0	0.833333	-0.714286	0.142857	-0.142857	-0.454545	0.666667	0	-0.111111	0	0	0.25	-0.6	0.714286	0.333333	0	-0.333333	-0.5	-0.36	0	0.4	0.714286	0	-0.4	-0.2
										-0.2	0.866667	0.5	0.217391	0	0.5	0.666667	-0.6	-0.772727	0.333333	0.617021	0.333333	-0.333333	-0.213115	0.538462	0	0.833333	-0.714286	0.142857	-0.142857	-0.454545	0.666667	0	-0.111111	0	0	0.25	-0.6	0.714286	0.333333	0	-0.333333	-0.5	-0.36	0	0.4	0.714286	0	-0.4	-0.2
										-0.2	0.866667	0.5	0.217391	0	0.5	0.666667	-0.6	-0.772727	0.333333	0.617021	0.333333	-0.333333	-0.213115	0.538462	0	0.846154	-0.714286	0.142857	-0.142857	-0.454545	0.666667	0	-0.111111	0	0	0.25	-0.6	0.714286	0.333333	0	-0.333333	-0.5	-0.36	0	0.4	0.714286	0	-0.4	-0.2
										-0.2	0.866667	0.5	0.217391	0	0.5	0.428571	-0.6	-0.777778	0.333333	0.617021	0.333333	-0.333333	-0.213115	0.538462	0	0.846154	-0.714286	0.142857	0	-0.454545	0.666667	0	-0.333333	0	0	0.25	-0.6	0.714286	0.333333	0	-0.333333	-0.5	-0.36	0	0.4	0.714286	0	-0.4	-0.2
										-0.2	0.866667	0.5	0.217391	0	0.5	0.428571	-0.6	-0.777778	0.333333	0.617021	0.333333	-0.333333	-0.213115	0.538462	0	0.846154	-0.714286	0.142857	0	-0.454545	0.666667	0	-0.333333	0	0	0.25	-0.6	0.714286	0.333333	0	-0.333333	-0.5	-0.36	0	0.4	0.714286	0	-0.4	-0.2
										-0.2	0.866667	0.5	0.217391	0	0.5	0.428571	-0.6	-0.777778	0.333333	0.617021	0.333333	-0.333333	-0.213115	0.538462	0	0.846154	-0.714286	0.142857	0	-0.454545	0.666667	0	-0.333333	0	0	0.25	-0.6	0.714286	0.333333	0	-0.333333	-0.5	-0.36	0	0.4	0.714286	0	-0.4	-0.2
										-0.2	0.866667	0.5	0.217391	0	0.5	0.428571	-0.6	-0.777778	0.333333	0.617021	0.333333	-0.333333	-0.213115	0.538462	0	0.846154	-0.714286	0.142857	0	-0.454545	0.666667	0	-0.333333	0	0	0.25	-0.6	0.714286	0.333333	0	-0.333333	-0.5	-0.36	0	0.4	0.714286	0	-0.4	-0.2
										-0.2	0.866667	0.5	0.217391	0	0.5	0.428571	-0.6	-0.777778	0.333333	0.617021	0.333333	-0.333333	-0.213115	0.538462	0	0.846154	-0.714286	0.142857	0	-0.454545	0.666667	0	-0.333333	0	0	0.25	-0.6	0.714286	0.333333	0	-0.333333	-0.5	-0.36	0	0.4	0.714286	0	-0.4	-0.2
										0	0.866667	0.5	0.217391	0	0.5	0.428571	-0.6	-0.777778	0.333333	0.617021	0.333333	-0.333333	-0.213115	0.538462	0	0.846154	-0.714286	0.142857	0	-0.454545	0.666667	-0.333333	-0.333333	0	0	0.25	-0.6	0.714286	0.333333	0	-0.333333	-0.5	-0.36	0	0.4	0.714286	0	-0.4	-0.2
										0.0769231	0.866667	0.5	0.217391	0	0.5	0.428571	-0.6	-0.777778	0.333333	0.617021	0.333333	-0.333333	-0.213115	0.538462	0	0.846154	-0.714286	0.142857	0	-0.454545	0.666667	-0.333333	-0.333333	0	0	0.25	-0.6	0.714286	0.333333	0	-0.333333	-0.5	-0.36	0	0.4	0.714286	0	-0.4	-0.2
										0.25	0.866667	0.5	0.217391	0	0.5	0.428571	-0.6	-0.777778	0.333333	0.617021	0.333333	-0.333333	-0.213115	0.538462	0	0.846154	-0.714286	0.142857	0	-0.454545	0.666667	-0.333333	-0.333333	0	0	0.25	-0.666667	0.714286	0.333333	0	-0.333333	-0.5	-0.36	0	0.4	0.714286	0	-0.4	-0.2
										0.4	0.866667	0.5	0.217391	0	0.5	0.428571	-0.6	-0.777778	0.333333	0.617021	0.333333	-0.333333	-0.213115	0.538462	0	0.846154	-0.714286	0.142857	0	-0.454545	0.666667	-0.333333	-0.333333	0	0	0.25	-0.666667	0.714286	0.333333	0	-0.333333	-0.5	-0.36	0	0.4	0.714286	0	-0.4	-0.2
										0.428571	0.866667	0.5	0.217391	0	0.5	0.428571	-0.6	-0.777778	0.333333	0.617021	0.333333	-0.333333	-0.213115	0.538462	0	0.846154	-0.714286	0.142857	0	-0.454545	0.666667	-0.333333	-0.333333	0	0	0.25	-0.666667	0.714286	0.333333	0	-0.333333	-0.5	-0.36	0	0.4	0.714286	0	-0.4	-0.2
										0.428571	0.866667	0.5	0.217391	0	0.5	0.5	-0.6	-0.777778	0.333333	0.617021	0.333333	-0.333333	-0.213115	0.538462	0	0.846154	-0.714286	0.142857	0	-0.454545	0.666667	-0.333333	-0.333333	0	0	0.25	-0.666667	0.714286	0.333333	0	-0.333333	-0.5	-0.36	0	0.4	0.714286	0	-0.4	-0.2
										0.428571	0.866667	0.5	0.217391	0	0.5	0.5	-0.6	-0.777778	0.333333	0.617021	0.333333	-0.333333	-0.213115	0.538462	0	0.846154	-0.714286	0.142857	0	-0.454545	0.666667	-0.333333	-0.333333	0	0	0.25	-0.666667	0.714286	0.333333	0	-0.333333	-0.5	-0.36	0	0.4	0.714286	0	-0.4	-0.2
										0.428571	0.866667	0.5	0.217391	0	0.5	0.5	-0.6	-0.777778	0.333333	0.617021	0.333333	-0.333333	-0.225806	0.538462	0	0.846154	-0.714286	0.142857	0	-0.454545	0.666667	-0.333333	-0.333333	0	0	0.25	-0.666667	0.714286	0.333333	0	-0.333333	-0.5	-0.384615	0	0.4	0.714286	0	-0.4	-0.2
										0.428571	0.866667	0.5	0.217391	0	0.5	0.5	-0.6	-0.777778	0.333333	0.617021	0.333333	-0.333333	-0.225806	0.538462	0	0.846154	-0.714286	0.142857	0	-0.454545	0.666667	-0.333333	-0.333333	0	0	0.25	-0.666667	0.714286	0.333333	0	-0.333333	-0.5	-0.407407	0	0.4	0.714286	0	-0.4	-0.2
										0.428571	0.866667	0.5	0.217391	0	0.5	0.5	-0.6	-0.777778	0.333333	0.625	0.333333	-0.333333	-0.225806	0.538462	0	0.846154	-0.714286	0.142857	0	-0.454545	0.666667	-0.333333	-0.333333	0	0	0.25	-0.666667	0.714286	0.333333	0	-0.333333	-0.5	-0.407407	0	0.4	0.714286	0	-0.4	-0.2
										0.428571	0.866667	0.5	0.217391	0	0.5	0.5	-0.6	-0.777778	0.333333	0.625	0.333333	-0.333333	-0.225806	0.538462	0	0.846154	-0.714286	0.142857	0	-0.454545	0.666667	-0.333333	-0.333333	0	0	0.25	-0.666667	0.714286	0.333333	0	-0.333333	-0.5	-0.407407	0	0.4	0.714286	0	-0.4	-0.2
										0.428571	0.866667	0.5	0.217391	0	0.5	0.5	-0.6	-0.777778	0.333333	0.625	0.333333	-0.333333	-0.225806	0.538462	0	0.846154	-0.714286	0.142857	0	-0.454545	0.666667	-0.333333	-0.333333	0	0	0.25	-0.666667	0.714286	0.333333	0	-0.333333	-0.5	-0.407407	0	0.4	0.714286	0	-0.4	-0.2
										0.428571	0.866667	0.5	0.217391	0	0.5	0.5	-0.6	-0.777778	0.333333	0.625	0.333333	-0.333333	-0.225806	0.538462	0	0.846154	-0.714286	0.142857	0	-0.454545	0.666667	-0.333333	-0.333333	0	0	0.25	-0.666667	0.714286	0.333333	0	-0.333333	-0.5	-0.407407	0	0.4	0.714286	0	-0.4	-0.2
										0.428571	0.866667	0.5	0.217391	0	0.5	0.5	-0.6	-0.777778	0.333333	0.625	0.333333	-0.333333	-0.225806	0.538462	0	0.846154	-0.714286	0.142857	0	-0.454545	0.666667	-0.333333	-0.333333	0	0	0.25	-0.666667	0.714286	0.333333	0	-0.333333	-0.5	-0.407407	0	0.4	0.714286	0	-0.4	-0.2
										0.428571	0.866667	0.5	0.217391	0	0.5	0.5	-0.6	-0.777778	0.333333	0.625	0.333333	-0.333333	-0.225806	0.538462	0	0.846154	-0.714286	0.142857	0	-0.454545	0.666667	-0.333333	-0.333333	0	0	0.25	-0.666667	0.714286	0.333333	0	-0.333333	-0.5	-0.407407	0	0.4	0.714286	0	-0.4	-0.2
										0.428571	0.866667	0.5	0.217391	0	0.5	0.5	-0.6	-0.777778	0.333333	0.625	0.333333	-0.333333	-0.225806	0.538462	0	0.846154	-0.714286	0.142857	0	-0.454545	0.666667	-0.333333	-0.333333	0	0	0.25	-0.666667	0.714286	0.333333	0	-0.333333	-0.5	-0.407407	0	0.4	0.714286	0	-0.4	-0.2
										0.428571	0.866667	0.5	0.217391	0	0.5	0.5	-0.6	-0.777778	0.333333	0.625	0.333333	-0.333333	-0.225806	0.538462	0	0.846154	-0.714286	0.142857	0	-0.454545	0.666667	-0.333333	-0.333333	0	0	0.25	-0.666667	0.714286	0.333333	0	-0.333333	-0.5	-0.407407	0	0.4	0.714286	0	-0.4	-0.2
										0.428571	0.866667	0.5	0.217391	0	0.5	0.5	-0.6	-0.777778	0.333333	0.625	0.333333	-0.333333	-0.225806	0.538462	0	0.846154	-0.714286	0.142857	0	-0.454545	0.666667	-0.333333	-0.333333	0	0	0.25	-0.666667	0.714286	0.333333	0	-0.333333	-0.5	-0.407407	0	0.4	0.714286	0	-0.4	-0.2
										0.428571	0.866667	0.5	0.217391	0	0.5	0.5	-0.6	-0.777778	0.333333	0.632653	0.333333	-0.333333	-0.225806	0.538462	0	0.846154	-0.714286	0.142857	0	-0.454545	0.666667	-0.333333	-0.333333	0	0	0.25	-0.666667	0.714286	0.333333	0	-0.333333	-0.5	-0.407407	0	0.4	0.714286	0	-0.4	-0.2
										0.428571	0.866667	0.5	0.217391	0	0.5	0.5	-0.6	-0.782609	0.333333	0.632653	0.333333	-0.333333	-0.225806	0.538462	0	0.846154	-0.714286	0.142857	0	-0.454545	0.666667	-0.333333	-0.333333	0	0	0.25	-0.666667	0.714286	0.333333	0	-0.333333	-0.5	-0.407407	0	0.4	0.714286	0	-0.272727	-0.2
										0.428571	0.866667	0.5	0.217391	0	0.5	0.5	-0.6	-0.782609	0.333333	0.632653	0.333333	-0.333333	-0.225806	0.538462	0	0.846154	-0.714286	0.142857	0	-0.454545	0.666667	-0.333333	-0.333333	0	0	0.25	-0.666667	0.714286	0.333333	0	-0.333333	-0.5	-0.407407	0	0.4	0.714286	0	-0.272727	-0.2
										0.428571	0.866667	0.5	0.217391	0	0.5	0.5	-0.6	-0.782609	0.333333	0.632653	0.333333	-0.333333	-0.225806	0.538462	0	0.846154	-0.714286	0.142857	0	-0.454545	0.666667	-0.333333	-0.333333	0	0	0.25	-0.666667	0.714286	0.333333	0	-0.333333	-0.5	-0.357143	0	0.4	0.714286	0	-0.272727	-0.2
										0.428571	0.866667	0.5	0.217391	0	0.5	0.5	-0.6	-0.782609	0.333333	0.632653	0.333333	-0.333333	-0.225806	0.538462	0	0.846154	-0.714286	0.142857	0	-0.454545	0.666667	-0.333333	-0.333333	0	0	0.25	-0.666667	0.714286	0.333333	0	-0.333333	-0.5	-0.310345	0	0.4	0.714286	0	-0.272727	-0.2
										0.428571	0.866667	0.5	0.217391	0	0.5	0.5	-0.6	-0.782609	0.333333	0.632653	0.333333	-0.333333	-0.225806	0.538462	0	0.846154	-0.714286	0.142857	0	-0.454545	0.666667	-0.333333	-0.333333	0	0	0.25	-0.666667	0.714286	0.333333	0	-0.333333	-0.5	-0.310345	0	0.4	0.714286	0	-0.272727	-0.2
										0.428571	0.866667	0.5	0.217391	0	0.5	0.5	-0.6	-0.782609	0.333333	0.632653	0.333333	-0.333333	-0.225806	0.538462	0	0.846154	-0.714286	0.142857	0	-0.454545	0.666667	-0.333333	-0.333333	0	0	0.25	-0.666667	0.714286	0.333333	0	-0.333333	-0.5	-0.310345	0	0.4	0.714286	0	-0.272727	0.142857
										0.428571	0.866667	0.5	0.217391	0	0.5	0.5	-0.6	-0.782609	0.333333	0.632653	0.333333	-0.333333	-0.225806	0.538462	0	0.846154	-0.714286	0.142857	0	-0.454545	0.666667	-0.333333	-0.333333	0	0	0.25	-0.666667	0.714286	0.333333	0	-0.333333	-0.5	-0.310345	0	0.4	0.714286	0	-0.272727	0
										0.428571	0.866667	0.5	0.217391	0	0.5	0.5	-0.6	-0.782609	0.333333	0.632653	0.333333	-0.333333	-0.225806	0.538462	0	0.846154	-0.714286	0.142857	0	-0.454545	0.666667	-0.333333	-0.333333	0	0	0.25	-0.666667	0.714286	0.333333	0	-0.333333	-0.5	-0.310345	0	0.4	0.714286	0	-0.272727	0
										0.428571	0.866667	0.5	0.217391	0	0.5	0.5	-0.6	-0.782609	0.333333	0.632653	0.333333	-0.333333	-0.225806	0.538462	0	0.846154	-0.714286	0.142857	0	-0.454545	0.666667	-0.333333	-0.333333	0	0	0.25	-0.666667	0.714286	0.333333	0	-0.333333	-0.5	-0.310345	0	0.4	0.714286	0	-0.272727	0
										0.428571	0.888889	0.5	0.217391	0	0.5	0.5	-0.6	-0.782609	0.333333	0.632653	0.333333	-0.333333	-0.225806	0.538462	0	0.846154	-0.714286	0.142857	0	-0.454545	0.666667	-0.333333	-0.333333	0	0	0.25	-0.666667	0.714286	0.333333	0	-0.333333	-0.5	-0.310345	0	0.4	0.714286	0	-0.272727	0
										0.428571	0.916667	0.5	0.217391	0	0.5	0.5	-0.6	-0.782609	0.333333	0.632653	0.333333	-0.333333	-0.225806	0.538462	0	0.846154	-0.714286	0.142857	0	-0.454545	0.666667	-0.333333	-0.333333	0	0	0.25	-0.666667	0.714286	0.333333	0	-0.333333	-0.5	-0.310345	0	0.4	0.714286	0	-0.272727	0
										0.428571	0.916667	0.5	0.217391	0	0.5	0.5	-0.6	-0.782609	0.333333	0.632653	0.333333	-0.333333	-0.225806	0.538462	0	0.846154	-0.714286	0.142857	0	-0.454545	0.666667	-0.333333	-0.333333	0	0	0.25	-0.666667	0.714286	0.333333	0	-0.333333	-0.5	-0.310345	0	0.4	0.714286	0	-0.272727	0
										0.428571	0.916667	0.5	0.217391	0	0.5	0.5	-0.6	-0.782609	0.333333	0.632653	0.333333	-0.333333	-0.225806	0.538462	0	0.846154	-0.714286	0.142857	0	-0.454545	0.666667	-0.333333	-0.333333	0	0	0.25	-0.666667	0.714286	0.333333	0	-0.333333	-0.5	-0.310345	0	0.4	0.714286	0	-0.272727	0
										0.428571	0.916667	0.5	0.217391	0	0.5	0.5	-0.6	-0.782609	0.333333	0.632653	0.333333	-0.333333	-0.225806	0.538462	0	0.846154	-0.714286	0.142857	0	-0.454545	0.666667	-0.333333	-0.333333	0	0	0.25	-0.666667	0.714286	0.333333	0	-0.333333	-0.5	-0.310345	0	0.4	0.714286	0	-0.272727	0
										0.428571	0.916667	0.5	0.217391	0	0.5	0.5	-0.6	-0.782609	0.333333	0.632653	0.333333	-0.333333	-0.225806	0.538462	0	0.9	-0.714286	0.142857	0	-0.454545	0.666667	-0.333333	-0.333333	0	0	0.25	-0.666667	0.714286	0.333333	0	-0.333333	-0.5	-0.310345	0	0.4	0.714286	0	-0.272727	0
										0.428571	0.916667	0.5	0.217391	0	0.5	0.5	-0.6	-0.782609	0.333333	0.632653	0.333333	-0.333333	-0.225806	0.538462	0	0.92	-0.714286	0.142857	0	-0.454545	0.666667	-0.333333	-0.333333	0	0	0.25	-0.666667	0.714286	0.333333	0	-0.333333	-0.5	-0.310345	0	0.4	0.714286	0	-0.272727	0
										0.428571	0.916667	0.5	0.217391	0	0.5	0.5	-0.6	-0.782609	0.333333	0.632653	0.333333	-0.333333	-0.225806	0.538462	0	0.92	-0.714286	0.142857	0	-0.454545	0.666667	-0.333333	-0.333333	0	0	0.25	-0.666667	0.714286	0.333333	0	-0.333333	-0.5	-0.310345	0	0.4	0.714286	0	-0.272727	0
										0.428571	0.916667	0.5	0.217391	0	0.5	0.5	-0.6	-0.782609	0.333333	0.632653	0.333333	-0.333333	-0.225806	0.538462	0	0.92	-0.714286	0.142857	0	-0.454545	0.666667	-0.333333	-0.333333	0	0	0.25	-0.666667	0.714286	0.333333	0	-0.333333	-0.5	-0.310345	0	0.4	0.714286	0	-0.272727	0
										0.428571	0.916667	0.5	0.217391	0	0.5	0.5	-0.6	-0.782609	0.333333	0.632653	0.333333	-0.333333	-0.225806	0.538462	0	0.92	-0.714286	0.142857	0	-0.454545	0.666667	-0.333333	-0.333333	0	0	0.25	-0.666667	0.714286	0.333333	0	-0.333333	-0.5	-0.310345	0	0.4	0.714286	0	-0.272727	0
										0.428571	0.916667	0.5	0.217391	0	0.5	0.5	-0.6	-0.782609	0.333333	0.632653	0.333333	-0.333333	-0.225806	0.538462	0	0.92	-0.714286	0.142857	0	-0.454545	0.666667	-0.333333	-0.333333	0	0	0.25	-0.666667	0.714286	0.333333	0	-0.333333	-0.5	-0.310345	0	0.4	0.714286	0	-0.272727	0
										0.428571	0.916667	0.5	0.217391	0	0.5	0.5	-0.6	-0.782609	0.333333	0.632653	0.333333	-0.333333	-0.225806	0.538462	0	0.92	-0.714286	0.142857	0	-0.454545	0.666667	-0.333333	-0.333333	0	0	0.25	-0.666667	0.714286	0.333333	0	-0.333333	-0.5	-0.310345	0	0.4	0.714286	0	-0.272727	0
										0.428571	0.916667	0.5	0.217391	0	0.5	0.5	-0.6	-0.782609	0.333333	0.632653	0.333333	-0.333333	-0.225806	0.538462	0	0.92	-0.714286	0.142857	0	-0.454545	0.666667	-0.333333	-0.333333	0	0	0.25	-0.666667	0.714286	0.333333	0	-0.333333	-0.5	-0.225806	0	0.4	0.714286	0	-0.272727	0
										0.428571	0.916667	0.5	0.217391	0	0.5	0.5	-0.6	-0.782609	0.333333	0.632653	0.333333	-0.333333	-0.225806	0.538462	0	0.92	-0.714286	0.142857	0	-0.454545	0.666667	-0.333333	-0.333333	0	0	0.25	-0.666667	0.714286	0.333333	0	-0.333333	-0.5	-0.225806	0	0.4	0.714286	0	-0.272727	0
										0.428571	0.916667	0.5	0.217391	0	0.5	0.5	-0.6	-0.782609	0.333333	0.632653	0.333333	-0.333333	-0.225806	0.538462	0	0.92	-0.714286	0.142857	0	-0.454545	0.666667	-0.333333	-0.333333	0	0	0.25	-0.666667	0.714286	0.333333	0	-0.333333	-0.5	-0.225806	0	0.4	0.714286	0	-0.272727	0
										0.428571	0.916667	0.5	0.217391	0	0.5	0.5	-0.6	-0.787234	0.333333	0.632653	0.333333	-0.333333	-0.225806	0.538462	0	0.92	-0.714286	0.142857	0	-0.454545	0.666667	-0.333333	-0.333333	0	0	0.25	-0.666667	0.714286	0.333333	0	-0.333333	-0.5	-0.225806	0	0.4	0.714286	0	-0.272727	0
										0.428571	0.916667	0.5	0.217391	0	0.5	0.5	-0.6	-0.787234	0.333333	0.632653	0.333333	-0.333333	-0.151515	0.538462	0	0.92	-0.714286	0.142857	0	-0.454545	0.666667	-0.333333	-0.333333	0	0	0.25	-0.666667	0.714286	0.333333	0	-0.333333	-0.5	-0.225806	0	0.4	0.714286	0	-0.272727	0
										0.428571	0.916667	0.5	0.217391	0	0.5	0.5	-0.6	-0.787234	0.333333	0.64	0.333333	-0.333333	-0.101449	0.538462	0	0.92	-0.714286	0.142857	0	-0.454545	0.666667	-0.333333	-0.333333	0	0	0.25	-0.666667	0.714286	0.333333	0	-0.333333	-0.5	-0.225806	0	0.4	0.714286	0	-0.272727	0
										0.428571	0.916667	0.5	0.217391	0	0.5	0.5	-0.6	-0.787234	0.333333	0.64	0.333333	-0.333333	-0.101449	0.538462	0	0.92	-0.714286	0.142857	0	-0.454545	0.666667	-0.333333	-0.333333	0	0	0.25	-0.666667	0.714286	0.333333	0	-0.333333	-0.5	-0.225806	0	0.4	0.714286	0	-0.272727	0
										0.428571	0.916667	0.5	0.217391	0	0.5	0.5	-0.6	-0.787234	0.333333	0.64	0.333333	-0.333333	-0.0857143	0.538462	0	0.92	-0.714286	0.142857	0	-0.454545	0.666667	-0.333333	-0.333333	0	0	0.25	-0.666667	0.714286	0.333333	0	-0.333333	-0.5	-0.225806	0	0.4	0.714286	0	-0.272727	0
										0.428571	0.916667	0.5	0.217391	0	0.5	0.5	-0.6	-0.787234	0.333333	0.64	0.333333	-0.333333	-0.0857143	0.538462	0	0.92	-0.714286	0.142857	0	-0.454545	0.666667	-0.333333	-0.333333	0	0	0.25	-0.666667	0.714286	0.333333	0	-0.333333	-0.5	-0.225806	0	0.4	0.714286	0	-0.272727	0
										0.428571	0.916667	0.5	0.217391	0	0.5	0.5	-0.6	-0.787234	0.333333	0.64	0.333333	-0.333333	-0.0857143	0.538462	0	0.92	-0.714286	-0.04	0	-0.454545	0.666667	-0.333333	-0.333333	0	0	0.25	-0.666667	0.714286	0.333333	0	-0.333333	-0.5	-0.225806	0	0.4	0.714286	0	-0.272727	0
										0.428571	0.916667	0.5	0.217391	0	0.5	0.5	-0.6	-0.787234	0.333333	0.64	0.333333	-0.333333	-0.0857143	0.538462	0	0.92	-0.714286	-0.04	0	-0.454545	0.666667	-0.333333	-0.333333	0	0	0.25	-0.666667	0.714286	0.333333	0	-0.333333	-0.5	-0.225806	0	0.4	0.714286	0	-0.272727	0
										0.428571	0.916667	0.5	0.217391	0	0.5	0.5	-0.6	-0.787234	0.333333	0.64	0.333333	-0.333333	-0.0857143	0.538462	0	0.92	-0.714286	-0.04	0	-0.454545	0.666667	-0.333333	-0.333333	0	0	0.25	-0.666667	0.714286	0.333333	0	-0.333333	-0.5	-0.225806	0	0.4	0.714286	0	-0.272727	0
										0.428571	0.916667	0.5	0.217391	0	0.5	0.5	-0.6	-0.787234	0.333333	0.64	0.333333	-0.333333	-0.0857143	0.538462	0	0.92	-0.714286	-0.04	0	-0.454545	0.666667	-0.333333	-0.333333	0	0	0.25	-0.666667	0.714286	0.333333	0	0	-0.5	-0.225806	0	0.4	0.714286	0	-0.272727	0
										0.428571	0.916667	0.5	0.217391	0	0.5	0.5	-0.6	-0.787234	0.333333	0.64	0.333333	-0.333333	-0.0857143	0.538462	0	0.92	-0.714286	-0.04	0	-0.454545	0.666667	-0.333333	-0.333333	0	0	0.25	-0.666667	0.714286	0.333333	0	0	-0.5	-0.225806	0	0.4	0.714286	0	-0.272727	0
										0.428571	0.916667	0.5	0.217391	0	0.5	0.5	-0.6	-0.787234	0.333333	0.64	0.333333	-0.333333	-0.0857143	0.538462	0	0.92	-0.714286	-0.04	0	-0.454545	0.666667	-0.333333	-0.333333	0	0	0.25	-0.666667	0.714286	0.333333	0	0	-0.5	-0.225806	0	0.4	0.714286	0	-0.272727	0
										0.428571	0.916667	0.5	0.217391	0	0.5	0.5	-0.6	-0.787234	0.333333	0.64	0.333333	-0.333333	-0.0857143	0.538462	0	0.92	-0.714286	-0.04	0	-0.454545	0.666667	-0.333333	-0.333333	0	0	0.25	-0.666667	0.714286	0.333333	0	0	-0.5	-0.225806	0	0.4	0.714286	0	-0.272727	0
										0.428571	0.916667	0.5	0.217391	0	0.5	0.5	-0.6	-0.787234	0.333333	0.64	0.333333	-0.333333	-0.0857143	0.538462	0	0.92	-0.714286	-0.04	0	-0.454545	0.666667	-0.333333	-0.333333	0	0	0.25	-0.666667	0.714286	0.333333	0	0	-0.5	-0.225806	0	0.4	0.714286	0	-0.272727	0
										0.428571	0.916667	0.5	0.217391	0	0.5	0.5	-0.6	-0.787234	0.333333	0.64	0.333333	-0.333333	-0.0857143	0.538462	0	0.92	-0.714286	-0.04	0	-0.454545	0.666667	-0.333333	-0.333333	0	0	0.25	-0.666667	0.714286	0.333333	0	0	-0.5	-0.225806	0	0.4	0.714286	0	-0.272727	0
										0.428571	0.916667	0.5	0.217391	0	0.5	0.5	-0.6	-0.787234	0.333333	0.64	0.333333	-0.333333	-0.0857143	0.538462	0	0.92	-0.714286	-0.04	0	-0.454545	0.666667	-0.333333	-0.333333	0	0	0.25	-0.666667	0.714286	0.333333	0	0	-0.5	-0.225806	0	0.4	0.714286	0	-0.272727	0
										0.428571	0.916667	0.5	0.217391	0	0.5	0.5	-0.6	-0.787234	0.333333	0.64	0.333333	-0.333333	-0.0857143	0.509434	0	0.92	-0.714286	-0.04	0	-0.454545	0.666667	-0.333333	-0.333333	0	0	0.25	-0.666667	0.714286	0.333333	0	0	-0.5	-0.225806	0	0.4	0.714286	0	-0.272727	0
										0.428571	0.916667	0.5	0.217391	0	0.5	0.5	-0.6	-0.787234	0.333333	0.64	0.333333	-0.333333	-0.0857143	0.509434	0	0.92	-0.714286	-0.04	0	-0.454545	0.666667	-0.333333	-0.333333	0	0	0.25	-0.666667	0.714286	0.333333	0	0	-0.5	-0.225806	0	0.4	0.714286	0	-0.272727	0
										0.428571	0.916667	0.5	0.217391	0	0.5	0.5	-0.6	-0.787234	0.333333	0.64	0.333333	-0.333333	-0.0857143	0.509434	0	0.92	-0.714286	-0.04	0	-0.454545	0.666667	-0.333333	-0.333333	0	0	0.25	-0.666667	0.714286	0.333333	0	0	-0.5	-0.225806	0	0.4	0.714286	0	-0.272727	0
										0.428571	0.916667	0.5	0.217391	0	0.5	0.5	-0.6	-0.787234	0.333333	0.647059	0.333333	-0.333333	-0.0857143	0.509434	0	0.92	-0.714286	-0.04	0	-0.454545	0.666667	-0.333333	-0.333333	0	0	0.25	-0.666667	0.714286	0.333333	0	0	-0.5	-0.225806	0	0.4	0.714286	0	-0.272727	0
										0.428571	0.916667	0.5	0.217391	0	0.5	0.5	-0.6	-0.787234	0.333333	0.660377	0.333333	-0.333333	-0.0857143	0.509434	0	0.92	-0.714286	-0.04	0	-0.454545	0.666667	-0.333333	-0.333333	0	0	0.25	-0.666667	0.714286	0.333333	0	-0.2	-0.5	-0.225806	0	0.4	0.714286	0	-0.272727	0
										0.428571	0.916667	0.5	0.217391	0	0.5	0.5	-0.6	-0.787234	0.333333	0.660377	0.333333	-0.333333	-0.0857143	0.509434	0	0.92	-0.714286	-0.04	0	-0.454545	0.666667	-0.333333	-0.333333	0	0	0.25	-0.666667	0.714286	0.333333	0	-0.2	-0.5	-0.225806	0	0.4	0.714286	0	-0.272727	0
										0.428571	0.916667	0.5	0.217391	0	0.5	0.5	-0.6	-0.787234	0.333333	0.660377	0.333333	-0.333333	-0.0857143	0.509434	0	0.92	-0.714286	-0.04	0	-0.454545	0.666667	-0.333333	-0.333333	0	0	0.25	-0.666667	0.714286	0.333333	0	-0.2	-0.5	-0.225806	0	0.4	0.714286	0	-0.272727	0
										0.428571	0.916667	0.5	0.217391	0	0.5	0.5	-0.6	-0.787234	0.333333	0.660377	0.333333	-0.333333	-0.0857143	0.509434	0	0.92	-0.714286	-0.04	0	-0.454545	0.666667	-0.333333	-0.333333	0	0	0.25	-0.666667	0.714286	0.333333	0	-0.2	-0.5	-0.225806	0	0.4	0.714286	0	-0.272727	0
										0.428571	0.916667	0.5	0.217391	0	0.5	0.5	-0.6	-0.787234	0.333333	0.660377	0.333333	-0.333333	-0.0857143	0.509434	0	0.92	-0.714286	-0.04	0	-0.454545	0.666667	-0.333333	-0.333333	0	0	0.25	-0.666667	0.714286	0.333333	0	-0.2	-0.5	-0.225806	0	0.4	0.714286	0	-0.272727	0
										0.428571	0.916667	0.5	0.217391	0	0.5	0.5	-0.6	-0.791667	0.333333	0.660377	0.333333	-0.333333	-0.0857143	0.509434	0	0.92	-0.714286	-0.04	0	-0.454545	0.666667	0.111111	-0.333333	0	0	0.25	-0.666667	0.714286	0.333333	0	-0.2	-0.5	-0.225806	0	0.4	0.714286	0	-0.272727	0
										0.428571	0.916667	0.5	0.217391	0	0.5	0.5	-0.6	-0.791667	0.333333	0.660377	0.333333	-0.333333	-0.0857143	0.509434	0	0.92	-0.714286	-0.04	0	-0.454545	0.666667	0.428571	-0.333333	0	0	0.25	-0.666667	0.714286	0.333333	0	-0.2	-0.5	-0.225806	0	0.4	0.714286	0	-0.272727	0
										0.428571	0.916667	0.5	0.217391	0	0.5	0.5	-0.6	-0.791667	0.333333	0.660377	0.333333	-0.333333	-0.0857143	0.509434	0	0.92	-0.714286	-0.04	0	-0.454545	0.666667	0.428571	-0.333333	0	0	0.25	-0.666667	0.714286	0.333333	0	-0.2	-0.5	-0.225806	0	0.4	0.714286	0	-0.272727	0
										0.428571	0.916667	0.5	0.217391	0	0.5	0.5	-0.6	-0.791667	0.333333	0.660377	0.333333	-0.333333	-0.0857143	0.509434	0	0.92	-0.714286	-0.04	0	-0.454545	0.666667	0.466667	-0.333333	0	0	0.25	-0.666667	0.714286	0.333333	0	-0.2	-0.5	-0.225806	0	0.4	0.714286	0	-0.272727	0
										0.428571	0.916667	0.5	0.217391	0	0.5	0.5	-0.6	-0.791667	0.333333	0.660377	0.333333	-0.333333	-0.0857143	0.509434	0	0.92	-0.714286	-0.04	0	-0.454545	0.666667	0.466667	-0.333333	0	0	0.25	-0.666667	0.714286	0.333333	0	-0.2	-0.5	-0.225806	0	0.4	0.714286	0	-0.272727	0
										0.428571	0.916667	0.5	0.217391	0	0.5	0.5	-0.6	-0.791667	0.333333	0.660377	0.333333	-0.333333	-0.0857143	0.509434	0	0.92	-0.714286	-0.04	0	-0.454545	0.666667	0.466667	-0.333333	0	0	0.25	-0.666667	0.714286	0.333333	0	-0.2	-0.5	-0.225806	0	0.4	0.714286	0	-0.272727	0
										0.428571	0.916667	0.5	0.217391	0	0.5	0.5	-0.611111	-0.791667	0.333333	0.660377	0.333333	-0.333333	-0.0857143	0.509434	0	0.92	-0.714286	-0.04	0	-0.454545	0.666667	0.466667	-0.333333	0	0	0.25	-0.666667	0.714286	0.333333	0	-0.2	-0.5	-0.225806	0	0.4	0.714286	0	-0.272727	0
										0.428571	0.916667	0.5	0.217391	0	0.5	0.5	-0.611111	-0.791667	0.333333	0.660377	0.333333	-0.333333	-0.0857143	0.509434	0	0.92	-0.714286	-0.04	0	-0.454545	0.666667	0.466667	-0.333333	0	0	0.25	-0.666667	0.714286	0.333333	0	-0.2	-0.5	-0.225806	0	0.4	0.714286	0	-0.272727	0
										0.428571	0.916667	0.5	0.217391	0	0.5	0.5	-0.611111	-0.791667	0.333333	0.660377	0.333333	-0.333333	-0.0857143	0.509434	0	0.92	-0.714286	-0.04	0	-0.454545	0.666667	0.466667	-0.333333	0	0	0.25	-0.666667	0.714286	0.333333	0	-0.2	-0.5	-0.225806	0	0.4	0.714286	0	-0.272727	0
										0.428571	0.916667	0.5	0.217391	0	0.5	0.5	-0.611111	-0.791667	0.333333	0.660377	0.333333	-0.333333	-0.0857143	0.509434	0	0.92	-0.714286	-0.04	0	-0.454545	0.666667	0.466667	-0.333333	0	0	0.25	-0.666667	0.714286	0.333333	0	-0.2	-0.5	-0.225806	0	0.4	0.714286	0	-0.272727	0
										0.428571	0.916667	0.5	0.217391	0	0.5	0.5	-0.611111	-0.791667	0.333333	0.660377	0.333333	-0.333333	-0.0857143	0.509434	0	0.92	-0.714286	-0.04	0	-0.454545	0.666667	0.466667	-0.333333	0	0	0.25	-0.666667	0.714286	0.333333	0	-0.2	-0.714286	-0.225806	0	0.4	0.714286	0	-0.272727	0
										0.428571	0.916667	0.5	0.217391	0	0.5	0.5	-0.611111	-0.791667	0.333333	0.660377	0.333333	-0.333333	-0.0857143	0.509434	0	0.92	-0.714286	-0.04	0	-0.454545	0.666667	0.466667	-0.333333	0	0	0.25	-0.666667	0.714286	0.333333	0	-0.2	-0.714286	-0.225806	0	0.4	0.714286	0	-0.272727	0
										0.428571	0.916667	0.5	0.217391	0	0.5	0.5	-0.611111	-0.791667	0.333333	0.660377	0.333333	-0.333333	-0.0857143	0.509434	0	0.92	-0.714286	-0.04	0	-0.454545	0.666667	0.466667	-0.333333	0	0	0.25	-0.666667	0.714286	0.333333	0	-0.2	-0.714286	-0.225806	0	0.4	0.714286	0	-0.272727	0
										0.428571	0.916667	0.5	0.217391	0	0.5	0.5	-0.611111	-0.791667	0.333333	0.660377	0.333333	-0.333333	-0.0857143	0.509434	0	0.92	-0.714286	-0.04	0	-0.454545	0.666667	0.466667	-0.333333	0	0	0.25	-0.666667	0.714286	0.333333	0	-0.2	-0.714286	-0.225806	0	0.4	0.714286	0	-0.272727	0
										0.428571	0.916667	0.5	0.217391	0	0.5	0.5	-0.611111	-0.791667	0.333333	0.660377	0.333333	-0.333333	-0.0857143	0.509434	0	0.92	-0.714286	-0.04	0	-0.454545	0.428571	0.466667	-0.333333	0	0	0.25	-0.666667	0.714286	0.333333	0	-0.2	-0.714286	-0.225806	0	0.4	0.714286	0	-0.272727	0
										0.428571	0.916667	0.5	0.217391	0	0.5	0.5	-0.611111	-0.791667	0.333333	0.660377	0.333333	-0.333333	-0.0857143	0.509434	0	0.92	-0.714286	-0.04	0	-0.454545	-0.166667	0.466667	-0.333333	0	0	0.25	-0.666667	0.714286	0.333333	0	-0.2	-0.714286	-0.225806	0	0.4	0.714286	0	-0.272727	0
										0.428571	0.916667	0.5	0.217391	0	0.5	0.5	-0.611111	-0.791667	0.333333	0.660377	0.333333	-0.333333	-0.0857143	0.509434	0	0.92	-0.714286	-0.04	0	-0.454545	-0.166667	0.466667	-0.333333	0	0	0.25	-0.666667	0.714286	0.333333	0	-0.2	-0.714286	-0.225806	0	0.4	0.714286	0	-0.272727	0
										0.428571	0.916667	0.5	0.217391	0	0.5	0.5	-0.611111	-0.791667	0.333333	0.660377	0.333333	-0.333333	-0.0857143	0.509434	0	0.92	-0.714286	-0.04	0	-0.454545	-0.166667	0.466667	-0.333333	0	0	0.25	-0.666667	0.714286	0.333333	0	-0.2	-0.714286	-0.225806	0	0.4	0.714286	0	-0.272727	0
										0.428571	0.769231	0.5	0.217391	0	0.5	0.5	-0.611111	-0.791667	0.333333	0.660377	0.333333	-0.333333	-0.0857143	0.509434	0	0.92	-0.714286	-0.04	0	-0.454545	-0.166667	0.466667	-0.333333	0	0	0.25	-0.666667	0.714286	0.333333	0	-0.2	-0.714286	-0.225806	0	0.4	0.714286	0	-0.272727	0
										0.428571	0.769231	0.5	0.217391	0	0.5	0.5	-0.611111	-0.791667	0.333333	0.660377	0.333333	-0.333333	-0.0857143	0.509434	0	0.92	-0.714286	-0.04	0	-0.454545	-0.166667	0.466667	-0.333333	0	0	0.25	-0.666667	0.714286	0.333333	0	-0.2	-0.714286	-0.225806	0	0.4	0.714286	0	-0.272727	0
										0.428571	0.769231	0.5	0.217391	0	0.5	0.5	-0.611111	-0.791667	0.333333	0.660377	0.333333	-0.333333	-0.0857143	0.509434	0	0.92	-0.714286	-0.04	0	-0.454545	-0.166667	0.466667	-0.333333	0	0	0.25	-0.666667	0.714286	0.333333	0	-0.2	-0.714286	-0.225806	0	0.4	0.714286	0	-0.272727	0
										0.428571	0.769231	0.5	0.217391	0	0.5	0.5	-0.611111	-0.791667	0.333333	0.660377	0.333333	-0.333333	-0.0857143	0.509434	0	0.92	-0.714286	-0.04	0	-0.454545	-0.166667	0.466667	-0.333333	0	0	0.25	-0.666667	0.714286	0.333333	0	-0.2	-0.714286	-0.225806	0	0.4	0.714286	0	-0.272727	0
										0.428571	0.769231	0.5	0.217391	0	0.5	0.5	-0.611111	-0.791667	0.333333	0.660377	0.333333	-0.333333	-0.0857143	0.509434	0	0.92	-0.714286	-0.04	0	-0.454545	-0.166667	0.466667	-0.333333	0	0	0.25	-0.666667	0.714286	0.333333	0	-0.2	-0.714286	-0.225806	0	0.4	0.714286	0	-0.272727	0
										0.428571	0.769231	0.5	0.217391	0	0.5	0.5	-0.611111	-0.791667	0.333333	0.660377	0.333333	-0.333333	-0.0857143	0.509434	0	0.92	-0.714286	-0.04	0	-0.454545	-0.166667	0.466667	-0.333333	0	0	0.25	-0.666667	0.714286	0.333333	0	-0.2	-0.714286	-0.225806	0	0.4	0.714286	0	-0.272727	0
										0.428571	0.769231	0.5	0.217391	0	0.5	0.5	-0.611111	-0.791667	0.333333	0.660377	0.333333	-0.333333	-0.0857143	0.509434	0	0.92	-0.714286	-0.04	0	-0.454545	-0.166667	0.466667	-0.333333	0	0	0.25	-0.666667	0.714286	0.333333	0	-0.2	-0.714286	-0.225806	0	0.4	0.6	0	-0.272727	0
										0.428571	0.769231	0.5	0.217391	0	0.5	0.5	-0.611111	-0.791667	0.333333	0.660377	0.333333	-0.333333	-0.0857143	0.509434	0	0.92	-0.714286	-0.04	0	-0.454545	-0.166667	0.466667	-0.333333	0	0	0.25	-0.666667	0.714286	0.333333	0	-0.2	-0.714286	-0.225806	0	0.4	0.6	0	-0.272727	0
										0.428571	0.769231	0.5	0.217391	0	0.5	0.5	-0.611111	-0.791667	0.333333	0.660377	0.333333	-0.333333	-0.0857143	0.509434	0	0.92	-0.714286	-0.04	0	-0.454545	-0.166667	0.466667	-0.333333	0	0	0.25	-0.666667	0.714286	0.333333	0	-0.2	-0.714286	-0.225806	0	0.4	0.6	0	-0.272727	0
										0.428571	0.769231	0.5	0.217391	0	0.5	0.5	-0.611111	-0.791667	0.333333	0.660377	0.333333	-0.333333	-0.0857143	0.509434	0	0.92	-0.714286	-0.04	0	-0.454545	-0.166667	0.466667	-0.333333	0	0	0.25	-0.666667	0.714286	0.333333	0	-0.2	-0.714286	-0.225806	0	0.4	0.5	0	-0.272727	0
										0.428571	0.769231	0.5	0.217391	0	0.5	0.5	-0.611111	-0.795918	0.333333	0.660377	0.333333	-0.333333	-0.0857143	0.509434	0	0.92	-0.714286	-0.04	0	-0.454545	-0.166667	0.466667	-0.333333	0	0	0.25	-0.666667	0.714286	0.333333	0	-0.2	-0.714286	-0.225806	0	0.4	0.5	0	-0.272727	0
										0.428571	0.769231	0.5	0.217391	0	0.5	0.5	-0.611111	-0.795918	0.333333	0.660377	0.333333	-0.333333	-0.0857143	0.509434	0	0.92	-0.714286	-0.04	0	-0.454545	-0.166667	0.466667	-0.333333	0	0	0.25	-0.666667	0.714286	0.333333	0	-0.2	-0.714286	-0.225806	0	0.4	0.5	0	-0.272727	0
										0.428571	0.769231	0.5	0.217391	0	0.5	0.5	-0.611111	-0.795918	0.333333	0.660377	0	-0.333333	-0.0857143	0.509434	0	0.92	-0.714286	-0.04	0	-0.454545	-0.166667	0.466667	-0.333333	0	0	0.25	-0.666667	0.714286	0.333333	0	-0.2	-0.714286	-0.225806	0	0.4	0.5	0	-0.272727	0
										0.428571	0.769231	0.5	0.217391	0	0.5	0.5	-0.611111	-0.795918	0.333333	0.660377	0	-0.333333	-0.0857143	0.509434	0	0.92	-0.714286	-0.0769231	0	-0.454545	-0.166667	0.466667	-0.333333	0	0	0.25	-0.666667	0.714286	0.333333	0	-0.2	-0.714286	-0.225806	0	0.4	0.5	0	-0.272727	0
										0.428571	0.769231	0.5	0.217391	0	0.5	0.5	-0.611111	-0.795918	0.333333	0.660377	0	-0.333333	-0.0857143	0.509434	0	0.92	-0.714286	-0.142857	0	-0.454545	-0.166667	0.466667	-0.333333	0	0	0.25	-0.666667	0.714286	0.333333	0	-0.2	-0.714286	-0.225806	0	0.4	0.5	0	-0.272727	0
										0.428571	0.769231	0.5	0.217391	0	0.5	0.5	-0.611111	-0.795918	0.333333	0.660377	0	-0.333333	-0.0857143	0.509434	0	0.92	-0.714286	-0.142857	0	-0.454545	-0.166667	0.466667	-0.333333	0	0	0.25	-0.666667	0.714286	0.333333	0	-0.2	-0.714286	-0.225806	0	0.4	0.5	0	-0.272727	0
										0.428571	0.642857	0.5	0.217391	0	0.5	0.5	-0.611111	-0.795918	0.333333	0.660377	0	-0.333333	-0.0857143	0.509434	0	0.92	-0.714286	-0.142857	0	-0.454545	-0.166667	0.466667	-0.333333	0	0	0.25	-0.666667	0.714286	0.333333	0	-0.2	-0.714286	-0.225806	0	0.4	0.5	0	-0.272727	0
										0.428571	0.483871	0.5	0.217391	0	0.5	0.5	-0.611111	-0.795918	0.333333	0.660377	0	-0.333333	-0.0857143	0.509434	0	0.92	-0.714286	-0.142857	-0.111111	-0.454545	-0.166667	0.466667	-0.333333	0	0	0.25	-0.666667	0.714286	0.333333	0	-0.2	-0.714286	-0.225806	0	0.4	0.5	0	-0.272727	0
										0.428571	0.352941	0.5	0.217391	0	0.5	0.333333	-0.611111	-0.795918	0.333333	0.660377	0	-0.333333	-0.0857143	0.509434	0	0.92	-0.714286	-0.142857	-0.333333	-0.454545	-0.166667	0.466667	-0.333333	0	0	0.25	-0.666667	0.714286	0.333333	0	-0.2	-0.714286	-0.225806	0	0.4	0.5	0	-0.272727	0
										0.428571	0.243243	0.5	0.217391	0	0.5	0.333333	-0.611111	-0.795918	0.333333	0.660377	0	-0.333333	-0.0857143	0.509434	0	0.92	-0.714286	-0.142857	-0.333333	-0.454545	-0.166667	0.466667	-0.333333	0	0	0.25	-0.666667	0.714286	0.333333	0	-0.2	-0.714286	-0.225806	0	0.4	0.5	0	-0.272727	0
										0.428571	0.243243	0.5	0.217391	0	0.5	0.333333	-0.611111	-0.795918	0.333333	0.660377	0	-0.333333	-0.0857143	0.509434	0	0.92	-0.714286	-0.142857	-0.384615	-0.454545	-0.166667	0.466667	-0.333333	0	0	0.25	-0.666667	0.714286	0.333333	0	-0.2	-0.714286	-0.225806	0	0.4	0.5	0	-0.272727	0
										0.428571	0.243243	0.5	0.217391	0.5	0.5	0.333333	-0.611111	-0.795918	0.333333	0.660377	0	-0.333333	-0.0857143	0.509434	0	0.92	-0.714286	-0.142857	-0.384615	-0.454545	-0.166667	0.466667	-0.333333	0	0	0.25	-0.666667	0.714286	0.333333	0	-0.2	-0.714286	-0.225806	0	0.4	0.5	0	-0.272727	0
										0.428571	0.243243	0.5	0.217391	0.777778	0.5	0.333333	-0.611111	-0.795918	0.333333	0.660377	0	-0.333333	-0.0857143	0.509434	0	0.92	-0.714286	-0.142857	-0.384615	-0.454545	-0.166667	0.466667	-0.333333	0	0	0.25	-0.666667	0.714286	0.333333	0	-0.2	-0.714286	-0.225806	0	0.4	0.5	0	-0.272727	0
										0.428571	0.243243	0.5	0.217391	0.846154	0.5	0.333333	-0.611111	-0.795918	0.333333	0.660377	0	-0.333333	-0.0857143	0.509434	0	0.92	-0.714286	-0.25	-0.384615	-0.454545	-0.166667	0.466667	-0.333333	0	0	0.25	-0.666667	0.714286	0.333333	0	-0.2	-0.714286	-0.225806	0	0.4	0.5	0	-0.272727	0
										0.428571	0.243243	0.5	0.217391	0.894737	0.5	0.333333	-0.611111	-0.795918	0.333333	0.660377	0	-0.333333	-0.0857143	0.509434	0	0.92	-0.714286	-0.25	-0.384615	-0.454545	-0.166667	0.466667	-0.333333	0	0	0.25	-0.666667	0.714286	0.333333	0	-0.2	-0.714286	-0.225806	0	0.4	0.5	0	-0.272727	0
										0.428571	0.243243	0.5	0.217391	0.894737	0.5	0.333333	-0.611111	-0.795918	0.333333	0.660377	0	-0.333333	-0.0857143	0.509434	0	0.92	-0.714286	-0.25	-0.384615	-0.454545	-0.166667	0.466667	-0.333333	0	0	0.25	-0.666667	0.714286	0.333333	0	-0.2	-0.714286	-0.225806	0	0.4	0.5	0	-0.428571	0
										0.428571	0.243243	0.5	0.217391	0.894737	0.5	0.333333	-0.611111	-0.795918	0.333333	0.660377	0	-0.333333	-0.0857143	0.509434	0	0.92	-0.714286	-0.25	-0.384615	-0.454545	-0.166667	0.466667	-0.333333	0	0	0.25	-0.666667	0.714286	0.333333	0	-0.2	-0.714286	-0.225806	0	0.4	0.5	0	-0.428571	0
										0.428571	0.243243	0.5	0.217391	0.894737	0.5	0.333333	-0.611111	-0.795918	0.333333	0.660377	0	-0.333333	-0.0857143	0.509434	0	0.92	-0.714286	-0.25	-0.384615	-0.454545	-0.166667	0.466667	-0.333333	0	0	0.25	-0.666667	0.714286	0.333333	0	-0.2	-0.714286	-0.225806	0	0.4	0.5	0	-0.428571	0
										0.428571	0.243243	0.5	0.217391	0.894737	0.5	0.333333	-0.611111	-0.795918	0.333333	0.660377	0	-0.333333	-0.0857143	0.509434	0	0.92	-0.714286	-0.25	-0.384615	-0.454545	-0.166667	0.466667	-0.333333	0	0	0.25	-0.666667	0.714286	0.333333	0	-0.2	-0.714286	-0.225806	0	0.4	0.5	0	-0.428571	0
										0.428571	0.243243	0.5	0.217391	0.894737	0.5	0.333333	-0.611111	-0.795918	0.333333	0.660377	0	-0.333333	-0.0857143	0.509434	0	0.92	-0.714286	-0.25	-0.384615	-0.454545	-0.166667	0.466667	-0.333333	0	0	0.25	-0.666667	0.714286	0.333333	0	-0.2	-0.714286	-0.225806	0	0.4	0.5	0	-0.428571	0
										0.428571	0.243243	0.5	0.217391	0.894737	0.5	0.333333	-0.611111	-0.795918	0.333333	0.660377	0	-0.333333	-0.0857143	0.509434	0	0.92	-0.714286	-0.25	-0.384615	-0.454545	-0.166667	0.466667	-0.333333	0	0	0.25	-0.666667	0.714286	0.333333	0	-0.2	-0.714286	-0.225806	0	0.4	0.5	0	-0.428571	0
										0.428571	0.243243	0.5	0.217391	0.894737	0.5	0.333333	-0.611111	-0.795918	0.333333	0.660377	0	-0.333333	-0.0857143	0.509434	0	0.92	-0.714286	-0.25	-0.384615	-0.454545	-0.166667	0.466667	-0.333333	0	0	0.25	-0.666667	0.714286	0.333333	0	-0.2	-0.714286	-0.225806	0	0.4	0.5	0	-0.428571	0
										0.428571	0.243243	0.5	0.217391	0.894737	0.5	0.333333	-0.611111	-0.795918	0.333333	0.660377	0	-0.333333	-0.0857143	0.509434	0	0.92	-0.714286	-0.25	-0.384615	-0.454545	-0.166667	0.466667	-0.333333	0	0	0.25	-0.666667	0.714286	0.333333	0	-0.2	-0.714286	-0.225806	0	0.4	0.5	0	-0.428571	0
										0.428571	0.243243	0.5	0.217391	0.894737	0.5	0.333333	-0.611111	-0.795918	0.333333	0.660377	0	-0.333333	-0.0857143	0.509434	0	0.92	-0.5	-0.25	-0.384615	-0.454545	-0.166667	0.466667	-0.333333	0	0	0.25	-0.666667	0.714286	0.333333	0	-0.2	-0.714286	-0.225806	0	0.4	0.5	0	-0.428571	0
										0.428571	0.243243	0.5	0.217391	0.894737	0.5	0.333333	-0.611111	-0.795918	0.333333	0.660377	0	-0.333333	-0.0857143	0.509434	0	0.923077	-0.5	-0.25	-0.384615	-0.454545	-0.166667	0.466667	-0.333333	0	0	0.25	-0.666667	0.714286	0.333333	0	-0.2	-0.714286	-0.225806	0	0.4	0.5	0	-0.428571	0
										0.428571	0.243243	0.5	0.217391	0.894737	0.5	0.333333	-0.611111	-0.795918	0.333333	0.660377	0	-0.333333	-0.0857143	0.509434	0	0.923077	-0.5	-0.25	-0.5	-0.454545	-0.166667	0.466667	-0.333333	0	0	0.25	-0.666667	0.714286	0.333333	0	-0.2	-0.714286	-0.225806	0	0.4	0.5	0	-0.428571	0
										0.428571	0.243243	0.5	0.217391	0.894737	0.5	0.333333	-0.611111	-0.795918	0.333333	0.660377	0	-0.333333	-0.111111	0.509434	0	0.923077	-0.5	-0.25	-0.5	-0.454545	-0.166667	0.466667	-0.333333	0	0	0.25	-0.666667	0.714286	0.333333	0	-0.2	-0.714286	-0.225806	0	0.4	0.5	0	-0.428571	0
										0.428571	0.243243	0.5	0.217391	0.894737	0.5	0.333333	-0.611111	-0.795918	0.333333	0.660377	0	-0.333333	-0.135135	0.509434	0	0.923077	-0.5	-0.25	-0.5	-0.454545	-0.166667	0.466667	-0.333333	0	0	0.25	-0.666667	0.714286	0.333333	0	-0.2	-0.714286	-0.225806	0	0.4	0.411765	0	-0.428571	0
										0.428571	0.243243	0.5	0.217391	0.894737	0.5	0.333333	-0.611111	-0.795918	0.333333	0.660377	0	-0.333333	-0.157895	0.509434	0	0.923077	-0.5	-0.25	-0.5	-0.454545	-0.166667	0.466667	-0.333333	0	0	0.25	-0.666667	0.714286	0.333333	0	-0.2	-0.714286	-0.225806	0	0.4	0.411765	0	-0.428571	0
										0.428571	0.243243	0.5	0.217391	0.894737	0.5	0.333333	-0.611111	-0.818182	0.333333	0.660377	0	-0.333333	-0.189873	0.509434	0	0.923077	-0.5	-0.25	-0.5	-0.454545	-0.166667	0.466667	-0.333333	0	0	0.25	-0.666667	0.714286	0.333333	0	-0.2	-0.714286	-0.225806	0	0.4	0.411765	0	-0.428571	0
										0.428571	0.243243	0.5	0.217391	0.894737	0.5	0.333333	-0.611111	-0.833333	0.333333	0.660377	0	-0.333333	-0.2	0.509434	0	0.923077	-0.5	-0.25	-0.5	-0.454545	-0.166667	0.466667	-0.333333	0	0	0.25	-0.666667	0	0.333333	0	-0.2	-0.714286	-0.225806	0	0.4	0.411765	0	-0.428571	0
										0.428571	0.243243	0.5	0.217391	0.894737	0.5	0.333333	-0.611111	-0.850746	0.333333	0.660377	0	-0.333333	-0.238095	0.509434	0	0.923077	-0.5	-0.25	-0.5	-0.454545	-0.166667	0.466667	-0.333333	0	0	0.25	-0.666667	0	0.333333	0	-0.2	-0.714286	-0.225806	0	0.4	0.411765	0	-0.428571	0
										0.428571	0.243243	0.5	0.217391	0.894737	0.5	0.333333	-0.611111	-0.866667	0.333333	0.660377	0	-0.333333	-0.264368	0.509434	0	0.923077	-0.5	-0.25	-0.5	-0.454545	-0.166667	0.466667	-0.142857	0	0	0.25	-0.666667	0	0.333333	0	-0.2	-0.714286	-0.225806	0	0.4	0.411765	0	-0.428571	0
										0.428571	0.243243	0.5	0.217391	0.894737	0.5	0.333333	-0.611111	-0.866667	0.333333	0.660377	0	-0.333333	-0.272727	0.509434	0	0.923077	-0.5	-0.25	-0.5	-0.454545	-0.166667	0.466667	-0.142857	0	0	0.25	-0.666667	-0.0769231	0.333333	0	-0.2	-0.714286	-0.225806	0	0.4	0.411765	0	-0.428571	0
										0.428571	0.243243	0.5	0.217391	0.894737	0.5	0.333333	-0.611111	-0.868421	0.333333	0.660377	0	-0.333333	-0.288889	0.509434	0	0.923077	-0.5	-0.25	-0.5	-0.454545	-0.166667	0.466667	-0.142857	0	0	0.25	-0.666667	-0.0769231	0.333333	0	0	-0.714286	-0.225806	0	0.4	0.411765	0	-0.428571	0
										0.428571	0.243243	0.5	0.217391	0.894737	0.5	0.333333	-0.611111	-0.868421	0.333333	0.660377	0	-0.333333	-0.304348	0.509434	0	0.923077	-0.5	-0.25	-0.5	-0.454545	-0.166667	0.466667	-0.142857	0	0	0.25	-0.666667	-0.0769231	0.333333	0	0.454545	-0.714286	-0.225806	0	0.4	0.411765	0	-0.428571	0
										0.428571	0.243243	0.5	0.217391	0.894737	0.5	0.333333	-0.611111	-0.868421	0.333333	0.660377	0	-0.333333	-0.326316	0.509434	0	0.923077	-0.5	-0.25	-0.5	-0.454545	-0.166667	0.466667	-0.142857	0	0	0.25	-0.666667	-0.0769231	0.333333	0	0.538462	-0.714286	-0.225806	0	0.166667	0.411765	0	-0.428571	0
										0.428571	0.243243	0.5	0.217391	0.894737	0.5	0.333333	-0.611111	-0.868421	0.333333	0.660377	0	-0.333333	-0.346939	0.509434	0	0.923077	-0.5	-0.25	-0.5	-0.454545	-0.166667	0.466667	-0.142857	0	0	0.25	-0.666667	-0.0769231	0.333333	0	0.538462	-0.714286	-0.225806	0	0.166667	0.411765	0	-0.428571	0
										0.428571	0.243243	0.5	0.217391	0.894737	0.5	0.333333	-0.611111	-0.868421	0.333333	0.660377	-0.2	-0.333333	-0.353535	0.509434	0	0.923077	-0.5	-0.25	-0.5	-0.454545	-0.166667	0.466667	-0.142857	0	0	0.25	-0.666667	-0.0769231	0.333333	0	0.538462	-0.714286	-0.225806	0	0.166667	0.411765	0	-0.428571	0
										0.428571	0.243243	0.5	0.217391	0.894737	0.5	0.333333	-0.611111	-0.868421	0.333333	0.660377	-0.2	-0.333333	-0.366337	0.509434	0	0.923077	-0.5	-0.25	-0.5	-0.454545	-0.166667	0.466667	-0.142857	0	0	0.25	-0.666667	-0.0769231	0.333333	0	0.538462	-0.714286	-0.225806	0	0.166667	0.411765	0	-0.428571	0
										0.428571	0.243243	0.5	0.217391	0.894737	0.5	0.333333	-0.611111	-0.868421	0.333333	0.660377	-0.2	-0.333333	-0.372549	0.509434	0	0.923077	-0.5	-0.25	-0.5	-0.454545	-0.166667	0.466667	-0.142857	0	0	0.25	-0.666667	-0.0769231	0.333333	0	0.538462	-0.714286	-0.225806	0	0.166667	0.411765	0	-0.428571	0
										0.428571	0.243243	0.5	0.217391	0.894737	0.5	0.333333	-0.611111	-0.868421	0.333333	0.660377	-0.2	-0.333333	-0.378641	0.509434	0	0.923077	-0.5	-0.25	-0.5	-0.454545	-0.166667	0.466667	-0.142857	0	0	0.25	-0.666667	-0.0769231	0.333333	0	0.538462	-0.714286	-0.225806	0	0.166667	0.411765	0	-0.428571	0
										0.428571	0.243243	0.5	0.217391	0.894737	0.5	0.333333	-0.611111	-0.868421	0.333333	0.660377	-0.2	-0.333333	-0.396226	0.509434	0	0.923077	-0.5	-0.25	-0.5	-0.454545	-0.166667	0.466667	-0.142857	0	0	0.25	-0.666667	-0.0769231	0.333333	0	0.538462	-0.714286	-0.225806	0	0.166667	0.411765	0	-0.466667	0
										0.428571	0.243243	0.5	0.217391	0.894737	0.5	0.333333	-0.611111	-0.868421	0.333333	0.660377	-0.2	-0.333333	-0.407407	0.509434	0	0.923077	-0.5	-0.25	-0.5	-0.454545	-0.166667	0.466667	-0.142857	0	0	0.25	-0.666667	-0.0769231	0.333333	0	0.538462	-0.714286	-0.117647	0	0.166667	0.411765	0	-0.529412	0
										0.428571	0.243243	0.5	0.217391	0.894737	0.5	0.333333	-0.611111	-0.868421	0.333333	0.660377	-0.2	-0.333333	-0.418182	0.509434	0	0.923077	-0.5	-0.25	-0.5	-0.454545	-0.166667	0.466667	-0.142857	0	0	0.25	-0.666667	-0.0769231	0.333333	0	0.538462	-0.714286	0.0731707	0	0.166667	0.411765	0	-0.529412	0
										0.428571	0.243243	0.5	0.217391	0.894737	0.5	0.333333	-0.611111	-0.868421	0.333333	0.660377	-0.2	-0.333333	-0.428571	0.509434	0	0.923077	-0.5	-0.25	-0.5	-0.454545	-0.166667	0.466667	-0.142857	0	0	0.25	-0.666667	-0.0769231	0.333333	0	0.538462	-0.714286	0.0731707	0	0.166667	0.411765	0	-0.529412	0
										0.428571	0.243243	0.5	0.217391	0.894737	0.5	0.333333	-0.611111	-0.868421	0.333333	0.660377	-0.2	-0.333333	-0.433628	0.509434	0	0.923077	-0.5	-0.25	-0.5	-0.454545	-0.166667	0.466667	-0.142857	0	0	0.25	-0.666667	-0.0769231	0.333333	0	0.538462	-0.714286	0.0731707	0	0.166667	0.411765	0	-0.529412	0
										0.428571	0.243243	0.5	0.217391	0.894737	0.5	0.333333	-0.611111	-0.868421	0.333333	0.660377	-0.2	-0.333333	-0.443478	0.509434	0	0.923077	-0.5	-0.25	-0.5	-0.454545	-0.166667	0.466667	-0.142857	0	0	0.25	-0.666667	-0.0769231	0.333333	0	0.538462	-0.714286	0.0731707	0	0.166667	0.411765	0	-0.529412	0
										0.428571	0.243243	0.5	0.217391	0.894737	0.5	0.333333	-0.611111	-0.868421	0.333333	0.660377	-0.2	-0.333333	-0.448276	0.509434	0	0.923077	-0.5	-0.25	-0.5	-0.454545	-0.166667	0.466667	-0.142857	0	0	0.25	-0.666667	-0.0769231	0.333333	0	0.538462	-0.714286	0.0731707	0	0.166667	0.411765	0	-0.529412	0
										0.428571	0.243243	0.5	0.217391	0.894737	0.5	0.333333	-0.611111	-0.868421	0.333333	0.666667	-0.2	-0.333333	-0.462185	0.509434	0	0.923077	-0.5	-0.25	-0.5	-0.454545	-0.166667	0.466667	-0.142857	0	0	0.25	-0.666667	-0.0769231	0.333333	0	0.538462	-0.714286	0.0731707	0	0.166667	0.411765	0	-0.529412	0
										0.428571	0.243243	0.5	0.217391	0.894737	0.5	0.333333	-0.611111	-0.868421	0.333333	0.666667	-0.2	-0.333333	-0.466667	0.509434	0	0.923077	-0.5	-0.25	-0.5	-0.454545	-0.166667	0.466667	-0.142857	0	0	0.25	-0.666667	-0.0769231	0.333333	0	0.538462	-0.714286	0.0731707	0	0.166667	0.411765	0	-0.529412	0
										0.428571	0.243243	0.5	0.217391	0.894737	0.5	0.333333	-0.611111	-0.868421	0.333333	0.666667	-0.2	-0.333333	-0.47541	0.509434	0	0.923077	-0.5	-0.25	-0.411765	-0.454545	-0.166667	0.466667	-0.142857	0	0	0.25	-0.666667	-0.0769231	0.333333	0	0.538462	-0.714286	0.0731707	0	0.166667	0.411765	0	-0.529412	0
										0.428571	0.243243	0.5	0.217391	0.894737	0.5	0.333333	-0.611111	-0.868421	0.333333	0.666667	-0.2	-0.333333	-0.488	0.509434	0	0.923077	-0.5	-0.25	0.111111	-0.454545	-0.166667	0.466667	-0.142857	0	0	0.25	-0.666667	-0.0769231	0.333333	0	0.538462	-0.714286	0.0731707	0	0.166667	0.411765	0	-0.529412	0
										0.428571	0.243243	0.5	0.217391	0.894737	0.5	0.333333	-0.611111	-0.868421	0.333333	0.666667	-0.2	-0.333333	-0.492063	0.509434	0	0.923077	-0.5	-0.25	0.111111	-0.454545	-0.166667	0.466667	-0.142857	0	0	0.25	-0.666667	-0.0769231	0.333333	0	0.538462	-0.714286	0.0731707	0	0.166667	0.411765	0	-0.529412	0
										0.428571	0.243243	0.5	0.217391	0.894737	0.5	0.333333	-0.611111	-0.868421	0.333333	0.666667	-0.2	-0.333333	-0.5	0.509434	0	0.923077	-0.5	-0.25	0.111111	-0.454545	-0.166667	0.466667	-0.142857	0	0	0.25	-0.666667	-0.0769231	0.333333	0	0.538462	-0.714286	0.0731707	0	0.166667	0.411765	0	-0.529412	0
										0.428571	0.243243	0.5	0.217391	0.894737	0.5	0.333333	-0.611111	-0.868421	0.333333	0.666667	-0.2	-0.333333	-0.5	0.509434	0	0.923077	-0.5	-0.25	0.111111	-0.454545	-0.166667	0.466667	-0.142857	0	0	0.25	-0.666667	-0.0769231	0.333333	0	0.538462	-0.714286	0.0731707	0	0.166667	0.411765	0	-0.529412	0
										0.428571	0.243243	0.5	0.217391	0.894737	0.5	0.333333	-0.611111	-0.868421	0.333333	0.666667	-0.2	-0.333333	-0.51145	0.509434	0	0.923077	-0.5	-0.25	0.111111	-0.454545	-0.166667	0.466667	-0.142857	0	0	0.25	-0.666667	-0.0769231	0.333333	0	0.538462	-0.714286	0.0731707	0	0.166667	0.411765	0	-0.529412	0
										0.5	0.243243	0.5	0.217391	0.894737	0.5	0.333333	-0.611111	-0.868421	0.333333	0.666667	-0.2	-0.333333	-0.518797	0.509434	0	0.666667	-0.5	-0.25	0.111111	-0.454545	-0.166667	0.466667	-0.142857	0	0	0.25	-0.666667	-0.0769231	0.333333	0	0.538462	-0.714286	0.0731707	0	0	0.411765	0	-0.529412	0
										0.538462	0.243243	0.5	0.217391	0.894737	0.5	0.333333	-0.611111	-0.868421	0.333333	0.666667	-0.2	-0.333333	-0.529412	0.509434	0	0.666667	-0.5	-0.25	0.111111	-0.454545	-0.166667	0.466667	-0.142857	0	0	0.25	-0.666667	-0.0769231	0.333333	0	0.538462	-0.714286	0.0731707	0	0	0.411765	0	-0.529412	0
										0.555556	0.243243	0.5	0.217391	0.894737	0.5	0.333333	-0.611111	-0.868421	0.333333	0.666667	-0.2	-0.333333	-0.529412	0.509434	0	0.666667	-0.5	-0.25	0.111111	-0.454545	-0.166667	0.466667	-0.142857	0	0	0.25	-0.666667	-0.0769231	0.333333	0	0.538462	-0.714286	0.0731707	0	0	0.411765	0	-0.529412	0
										0.586207	0.243243	0.5	0.217391	0.894737	0.5	0.333333	-0.611111	-0.87013	0.333333	0.666667	-0.2	-0.333333	-0.532847	0.509434	0	0.666667	-0.5	-0.25	0.111111	-0.454545	-0.166667	0.466667	-0.142857	0	0	0.25	-0.666667	-0.0769231	0.333333	0	0.538462	-0.714286	0.0731707	0	0	0.411765	0	-0.529412	0.272727
										0.636364	0.263158	0.5	0.217391	0.894737	0.5	0.333333	-0.611111	-0.87013	0.333333	0.666667	-0.2	-0.333333	-0.532847	0.509434	0	0.666667	-0.5	-0.25	0.111111	-0.454545	-0.166667	0.466667	-0.142857	0	0	0.25	-0.666667	-0.0769231	0.333333	0	0.538462	-0.714286	0.0731707	0	0	0.411765	0	-0.529412	0.272727
										0.647059	0.3	0.5	0.217391	0.894737	0.5	0.333333	-0.611111	-0.87013	0.333333	0.666667	-0.2	-0.333333	-0.532847	0.509434	0	0.666667	-0.5	-0.25	0.111111	-0.454545	-0.166667	0.466667	-0.142857	0	0	0.25	-0.666667	-0.0769231	0.333333	0	0.538462	-0.714286	0.0731707	0	0	0.411765	0	-0.529412	0.272727
										0.657143	0.363636	0.5	0.217391	0.894737	0.5	0.333333	-0.611111	-0.87013	0.333333	0.607143	-0.2	-0.333333	-0.532847	0.509434	0	0.666667	-0.5	-0.25	0.111111	-0.454545	-0.166667	0.466667	-0.142857	0	0	0.25	-0.666667	-0.0769231	0.333333	0	0.538462	-0.714286	0.0731707	0	0	0.411765	0	-0.529412	0.166667
										0.675676	0.428571	0.5	0.217391	0.894737	0.5	0.333333	-0.611111	-0.87013	0.333333	0.5	-0.2	-0.333333	-0.532847	0.509434	0	0.666667	-0.5	-0.25	0.111111	-0.454545	-0.166667	0.466667	-0.142857	0	0	0.25	-0.666667	-0.0769231	0.333333	0	0.538462	-0.714286	0.0731707	0	0	0.411765	0	-0.529412	0.166667
										0.675676	0.471698	0.5	0.217391	0.894737	0.5	0.333333	-0.611111	-0.87013	0.333333	0.343284	-0.2	-0.333333	-0.532847	0.509434	0	0.666667	-0.5	-0.25	0.111111	-0.454545	-0.166667	0.466667	-0.142857	0	0	0.25	-0.666667	-0.0769231	0.333333	0	0.538462	-0.714286	0.0731707	0	0.3	0.411765	0	-0.529412	0.166667
										0.7	0.525424	0.5	0.217391	0.894737	0.5	0.333333	-0.611111	-0.87013	0.333333	0.267606	-0.2	-0.333333	-0.532847	0.509434	0	0.666667	-0.5	-0.25	0.111111	-0.454545	-0.166667	0.466667	-0.142857	0	0	0.25	-0.666667	-0.0769231	0.333333	0	0.538462	-0.714286	0.0731707	0	0.44	0.411765	0	-0.529412	0.166667
										0.707317	0.533333	0.5	0.217391	0.894737	0.5	0.333333	-0.611111	-0.87013	0.333333	0.25	-0.2	-0.333333	-0.532847	0.509434	0	0.666667	-0.5	-0.25	0.111111	-0.454545	-0.166667	0.466667	-0.142857	0	0	0.25	-0.666667	-0.0769231	0.333333	0	0.538462	-0.714286	0.0731707	0	0.44	0.411765	0	-0.529412	0.166667
										0.727273	0.533333	0.5	0.217391	0.894737	0.5	0.333333	-0.611111	-0.87013	0.333333	0.25	-0.2	-0.333333	-0.532847	0.481482	0	0.666667	-0.5	-0.25	0.111111	-0.454545	-0.166667	0.466667	-0.142857	0	0	0.25	-0.666667	-0.0769231	0.333333	0	0.571429	-0.714286	0.0731707	0	0.44	0.411765	0	-0.529412	0.166667
										0.755102	0.533333	0.5	0.217391	0.894737	0.5	0.333333	-0.611111	-0.87013	0.333333	0.25	-0.2	-0.333333	-0.549296	0.481482	0	0.666667	-0.5	-0.25	0.111111	-0.454545	-0.166667	0.466667	-0.142857	0	0	0.25	-0.666667	-0.0769231	0.333333	0	0.571429	-0.714286	0.0731707	0	0.44	0.411765	0	-0.529412	0.166667
										0.76	0.533333	0.5	0.217391	0.894737	0.5	0.333333	-0.611111	-0.87013	0.333333	0.25	-0.2	-0.333333	-0.552448	0.481482	0	0.666667	-0.5	-0.25	0.111111	-0.454545	-0.166667	0.466667	-0.142857	0	0	0.25	-0.666667	-0.0769231	0.333333	0	0.571429	-0.714286	0.0731707	0	0.44	0.411765	0	-0.529412	0.166667
										0.76	0.533333	0.5	0.217391	0.894737	0.5	0.333333	-0.611111	-0.87013	0.333333	0.2	-0.2	-0.333333	-0.555556	0.481482	0	0.666667	-0.5	-0.25	0.111111	-0.454545	-0.166667	0.466667	-0.142857	0	0	0.25	-0.666667	-0.0769231	0.333333	0	0.571429	-0.714286	0.0731707	0	0.44	0.411765	0	-0.529412	0.166667
										0.76	0.533333	0.5	0.217391	0.894737	0.5	0.333333	-0.611111	-0.87013	0.333333	0.2	-0.2	-0.333333	-0.555556	0.481482	0	0.666667	-0.5	-0.25	0.111111	-0.454545	-0.166667	0.466667	-0.142857	0	0	0.25	-0.666667	-0.0769231	0.333333	0	0.571429	-0.714286	0.0731707	0	0.44	0.411765	0	-0.529412	0.166667
										0.76	0.533333	0.5	0.217391	0.894737	0.5	0.333333	-0.611111	-0.87013	0.333333	0.18421	-0.2	-0.333333	-0.555556	0.481482	0	0.666667	-0.5	-0.25	0.111111	-0.454545	-0.166667	0.466667	-0.142857	0	0	0.25	-0.666667	-0.0769231	0.333333	0	0.571429	-0.714286	0.0731707	0	0.44	0.411765	0	-0.529412	0.166667
										0.76	0.533333	0.5	0.217391	0.894737	0.5	0.333333	-0.611111	-0.87013	0.333333	0.18421	-0.2	-0.333333	-0.555556	0.481482	0	0.666667	-0.5	-0.25	0.111111	-0.454545	-0.166667	0.466667	-0.142857	0	0	0.25	-0.666667	-0.0769231	0.333333	0	0.571429	-0.714286	0.0731707	0	0.44	0.411765	0	-0.529412	0.166667
										0.76	0.533333	0.5	0.217391	0.894737	0.5	0.333333	-0.611111	-0.87013	0.333333	0.18421	-0.2	-0.333333	-0.555556	0.481482	0	0.666667	-0.5	-0.25	0.111111	-0.454545	-0.166667	0.466667	-0.142857	0	0	0.25	-0.666667	-0.0769231	0.333333	0	0.571429	-0.714286	0.0731707	0	0.44	0.333333	0	-0.529412	0.166667
										0.76	0.533333	0.5	0.217391	0.894737	0.5	0.333333	-0.611111	-0.87013	0.333333	0.18421	-0.2	-0.333333	-0.555556	0.481482	0	0.666667	-0.5	-0.25	0.111111	-0.454545	-0.166667	0.466667	-0.142857	0	0	0.25	-0.666667	-0.0769231	0.333333	0	0.571429	-0.714286	0.0731707	0	0.44	0.333333	0	-0.529412	0.285714
										0.76	0.533333	0.5	0.217391	0.894737	0.5	0.333333	-0.611111	-0.87013	0.333333	0.18421	-0.2	-0.333333	-0.555556	0.481482	0	0.666667	-0.5	-0.25	0.111111	-0.454545	-0.166667	0.466667	-0.142857	0	0	0.25	-0.666667	-0.0769231	0.333333	0	0.571429	-0.714286	0.0731707	0	0.44	0.333333	0	-0.529412	0.444445
										0.76	0.533333	0.5	0.217391	0.894737	0.5	0.333333	-0.611111	-0.87013	0.333333	0.18421	-0.2	-0.333333	-0.555556	0.481482	0	0.666667	-0.5	-0.25	0.111111	-0.454545	-0.166667	0.466667	-0.142857	0	0	0.25	-0.666667	-0.0769231	0.333333	0	0.571429	-0.714286	0.0731707	0	0.44	0.333333	0	-0.529412	0.5
										0.76	0.533333	0.5	0.217391	0.894737	0.5	0.333333	-0.611111	-0.87013	0.333333	0.18421	-0.2	-0.333333	-0.555556	0.481482	0	0.666667	-0.5	-0.25	0.111111	-0.454545	-0.166667	0.466667	-0.142857	0	0	0.25	-0.666667	-0.0769231	0.333333	0	0.571429	-0.714286	0.0731707	0	0.44	0.333333	0	-0.529412	0.5
										0.76	0.533333	0.5	0.217391	0.894737	0.5	0.333333	-0.611111	-0.87013	0.333333	0.18421	-0.2	-0.333333	-0.555556	0.481482	0	0.666667	-0.5	-0.25	0.111111	-0.454545	-0.166667	0.466667	-0.142857	0	0	0.25	-0.666667	-0.0769231	0.333333	0	0.571429	-0.714286	0.0731707	0	0.44	0.333333	0	-0.636364	0.5
										0.76	0.533333	0.5	0.217391	0.894737	0.5	0.333333	-0.611111	-0.87013	0.333333	0.18421	-0.2	-0.333333	-0.555556	0.481482	0	0.666667	-0.5	-0.25	0.111111	-0.454545	-0.166667	0.466667	-0.142857	0	0	0.25	-0.666667	-0.0769231	0.333333	0	0.571429	-0.714286	0.0731707	0	0.44	0.333333	0	-0.636364	0.5
										0.76	0.460317	0.5	0.217391	0.894737	0.5	0.333333	-0.611111	-0.87013	0.333333	0.194805	-0.2	-0.333333	-0.555556	0.481482	0	0.666667	-0.5	-0.25	0.111111	-0.454545	-0.166667	0.466667	-0.142857	0	0	0.25	-0.666667	-0.0769231	0.333333	0	0.571429	-0.714286	0.0731707	0	0.44	0.333333	0	-0.636364	0.5
										0.76	0.373134	0.5	0.217391	0.894737	0.5	0.333333	-0.611111	-0.871795	0.333333	0.194805	-0.2	-0.333333	-0.555556	0.481482	0	0.666667	-0.5	-0.25	0.111111	-0.454545	-0.166667	0.466667	-0.142857	0	0	0.25	-0.666667	-0.0769231	0.333333	0	0.571429	-0.714286	0.0731707	0	0.44	0.333333	0	-0.636364	0.5
										0.76	0.243243	0.5	0.217391	0.894737	0.5	0.333333	-0.611111	-0.871795	0.333333	0.194805	-0.2	-0.333333	-0.555556	0.481482	0	0.666667	-0.5	-0.25	0.111111	-0.454545	-0.166667	0.466667	-0.142857	0	0	0.25	-0.666667	-0.0769231	0.333333	0	0.571429	-0.714286	0.0731707	0	0.44	0.333333	0	-0.636364	0.5
										0.76	0.243243	0.5	0.217391	0.894737	0.5	0.333333	-0.611111	-0.871795	0.333333	0.194805	-0.2	-0.333333	-0.555556	0.481482	0	0.666667	-0.5	-0.25	0.111111	-0.454545	-0.166667	0.466667	-0.142857	0	0	0.25	-0.666667	-0.0769231	0.333333	0	0.571429	-0.714286	0.0731707	0	0.44	0.333333	0	-0.636364	0.5
										0.76	0.243243	0.5	0.217391	0.894737	0.5	0.333333	-0.611111	-0.871795	0.333333	0.194805	-0.2	-0.333333	-0.555556	0.481482	0	0.666667	-0.5	-0.25	0.111111	-0.454545	-0.166667	0.466667	-0.142857	0	0	0.25	-0.666667	-0.0769231	0.333333	0	0.571429	-0.714286	0.0731707	0	0.44	0.333333	0	-0.636364	0.5
										0.76	0.226667	0.5	0.217391	0.894737	0.5	0.333333	-0.611111	-0.871795	0.333333	0.194805	-0.2	-0.333333	-0.555556	0.481482	0	0.666667	-0.5	-0.25	0.111111	-0.454545	-0.166667	0.466667	-0.142857	0	0	0.25	-0.666667	-0.0769231	0.333333	0	0.571429	-0.714286	0.0731707	0	0.44	0.333333	0	-0.636364	0.5
										0.76	0.226667	0.5	0.217391	0.894737	0.5	0.333333	-0.611111	-0.871795	0.333333	0.194805	-0.2	-0.333333	-0.555556	0.481482	0	0.666667	-0.5	-0.25	0.111111	-0.454545	-0.166667	0.375	-0.142857	0	0	0.25	-0.666667	-0.0769231	0.333333	0	0.571429	-0.714286	0.0731707	0	0.44	0.333333	0	-0.636364	0.5
										0.76	0.226667	0.5	0.217391	0.894737	0.5	0.333333	-0.611111	-0.871795	0.333333	0.194805	-0.2	-0.333333	-0.555556	0.481482	0	0.666667	-0.5	-0.25	0.111111	-0.454545	-0.166667	0.375	-0.142857	0	0	0.25	-0.666667	-0.0769231	0.333333	0	0.571429	-0.714286	0.0731707	0	0.44	0.333333	0	-0.636364	0.5
										0.76	0.226667	0.5	0.217391	0.894737	0.5	0.333333	-0.611111	-0.871795	0.333333	0.194805	-0.2	-0.333333	-0.555556	0.481482	0	0.666667	-0.5	-0.25	0.111111	-0.454545	-0.166667	0.375	-0.142857	0	0	0.25	-0.666667	-0.0769231	0.333333	0	0.571429	-0.714286	0.0731707	0	0.44	0.333333	0	-0.636364	0.5
										0.76	0.226667	0.5	0.217391	0.894737	0.5	0.333333	-0.611111	-0.871795	0.333333	0.194805	-0.2	-0.333333	-0.555556	0.481482	0	0.666667	-0.5	-0.25	0.111111	-0.454545	-0.166667	0.375	-0.142857	0	0	0.25	-0.666667	-0.0769231	0.333333	0	0.571429	-0.714286	0.0731707	0	0.44	0.333333	0	-0.636364	0.5
										0.76	0.226667	0.5	0.217391	0.894737	0.5	0.333333	-0.611111	-0.871795	0.333333	0.194805	-0.2	-0.333333	-0.555556	0.481482	0	0.666667	-0.5	-0.25	0.111111	-0.454545	-0.166667	0.375	-0.142857	0	0	0.25	-0.666667	-0.0769231	0.333333	0	0.571429	-0.714286	0.0731707	0.666667	0.44	0.333333	0	-0.636364	0.5
										0.76	0.226667	0.5	0.217391	0.894737	0.5	0.333333	-0.611111	-0.871795	0.333333	0.194805	-0.2	-0.333333	-0.555556	0.481482	0	0.666667	-0.5	-0.25	0.111111	-0.454545	-0.166667	0.375	-0.142857	0	0	0.25	-0.666667	-0.0769231	0.333333	0	0.571429	-0.714286	0.0731707	0.714286	0.44	0.333333	0	-0.636364	0.6
										0.76	0.226667	0.5	0.217391	0.894737	0.5	0.333333	-0.611111	-0.871795	0.333333	0.194805	-0.2	-0.333333	-0.555556	0.481482	0	0.666667	-0.5	-0.25	0.111111	-0.454545	-0.166667	0.375	-0.142857	0	0	0.25	-0.666667	-0.0769231	0.333333	0	0.571429	-0.714286	0.0731707	0.714286	0.44	0.333333	0	-0.636364	0.642857
										0.76	0.226667	0.5	0.217391	0.894737	0.5	0.333333	-0.611111	-0.871795	0.333333	0.194805	-0.2	-0.333333	-0.555556	0.481482	0	0.666667	-0.5	-0.25	0.111111	-0.454545	-0.166667	0.375	-0.142857	0	0	0.25	-0.666667	-0.0769231	0.333333	0	0.571429	-0.714286	0.0731707	0.777778	0.44	0.333333	0	-0.636364	0.642857
										0.76	0.226667	0.5	0.217391	0.894737	0.5	0.333333	-0.611111	-0.871795	0.333333	0.194805	-0.2	-0.333333	-0.555556	0.481482	0	0.666667	-0.5	-0.25	0.142857	-0.454545	-0.166667	0.375	-0.142857	0	0	0.25	-0.666667	-0.0769231	0.333333	0	0.571429	-0.714286	0.0731707	0.777778	0.44	0.333333	0	-0.636364	0.642857
										0.76	0.226667	0.5	0.217391	0.894737	0.5	0.333333	-0.611111	-0.871795	0.333333	0.194805	-0.2	-0.333333	-0.555556	0.481482	0.333333	0.666667	-0.5	-0.25	0.142857	-0.454545	-0.166667	0.375	-0.142857	0	0	0.25	-0.666667	-0.0769231	0.333333	0	0.571429	-0.714286	0.0731707	0.777778	0.44	0.333333	0	-0.636364	0.642857
										0.76	0.210526	0.5	0.217391	0.894737	0.5	0.333333	-0.611111	-0.871795	0.333333	0.194805	-0.2	-0.333333	-0.555556	0.481482	0.333333	0.666667	-0.5	-0.25	0.142857	-0.454545	-0.166667	0.375	-0.142857	0	0	0.25	-0.666667	-0.0769231	0.333333	0	0.571429	-0.714286	0.0731707	0.8	0.44	0.333333	0	-0.636364	0.642857
										0.76	0.210526	0.5	0.217391	0.894737	0.5	0.333333	-0.611111	-0.871795	0.333333	0.194805	-0.2	-0.333333	-0.555556	0.481482	0.333333	0.666667	-0.5	-0.25	0.142857	-0.454545	-0.166667	0.375	-0.142857	0	0	0.25	-0.666667	-0.0769231	0.333333	0	0.571429	-0.714286	0.0731707	0.818182	0.44	0.333333	0	-0.636364	0.642857
										0.76	0.210526	0.5	0.217391	0.894737	0.5	0.333333	-0.611111	-0.871795	0.333333	0.194805	-0.2	-0.333333	-0.555556	0.481482	0.333333	0.666667	-0.5	-0.25	0.142857	-0.454545	-0.166667	0.375	-0.142857	0	0	0.25	-0.666667	-0.0769231	0.333333	0	0.571429	-0.714286	0.0731707	0.818182	0.44	0.333333	0	-0.636364	0.642857
										0.76	0.210526	0.5	0.217391	0.894737	0.5	0.333333	-0.611111	-0.871795	0.333333	0.194805	-0.2	-0.333333	-0.555556	0.481482	0.333333	0.666667	-0.5	-0.25	0.142857	-0.454545	-0.166667	0.375	-0.142857	0	0	0.25	-0.666667	-0.0769231	0.333333	0	0.571429	-0.714286	0.0731707	0.833333	0.44	0.333333	0	-0.636364	0.642857
										0.76	0.210526	0.5	0.217391	0.894737	0.5	0.333333	-0.611111	-0.871795	0.333333	0.194805	-0.2	-0.333333	-0.555556	0.481482	0.333333	0.666667	-0.5	-0.25	0.142857	-0.454545	-0.166667	0.375	-0.142857	0	0	0.25	-0.666667	-0.0769231	0.333333	0	0.571429	-0.714286	0.0731707	0.846154	0.44	0.333333	0	-0.636364	0.642857
										0.76	0.210526	0.5	0.217391	0.894737	0.5	0.333333	-0.611111	-0.871795	0.333333	0.194805	-0.2	-0.333333	-0.555556	0.481482	0.333333	0.666667	-0.5	-0.25	0.142857	-0.454545	-0.166667	0.375	-0.142857	0	0	0.25	-0.666667	-0.0769231	0.333333	0	0.571429	-0.714286	0.0731707	0.846154	0.44	0.333333	0	-0.636364	0.642857
										0.76	0.210526	0.5	0.217391	0.894737	0.5	0.333333	-0.611111	-0.871795	0.333333	0.194805	-0.2	-0.333333	-0.555556	0.481482	0.333333	0.666667	-0.5	-0.25	0.142857	-0.454545	-0.166667	0.375	-0.142857	0	0	0.25	-0.666667	-0.0769231	0.333333	0	0.571429	-0.714286	0.0731707	0.866667	0.44	0.333333	0	-0.636364	0.642857
										0.76	0.210526	0.5	0.217391	0.894737	0.5	0.333333	-0.611111	-0.871795	0.333333	0.194805	-0.2	-0.333333	-0.555556	0.481482	0.333333	0.666667	-0.5	-0.25	0.142857	-0.454545	-0.166667	0.375	-0.142857	0	0	0.25	-0.666667	-0.0769231	0.333333	0	0.571429	-0.714286	0.0731707	0.888889	0.44	0.333333	0	-0.636364	0.642857
										0.76	0.210526	0.5	0.217391	0.894737	0.5	0.333333	-0.611111	-0.871795	0.333333	0.253012	-0.2	-0.333333	-0.555556	0.481482	0.333333	0.666667	-0.5	-0.25	0.142857	-0.454545	-0.166667	0.375	-0.142857	0	0	0.25	-0.666667	-0.0769231	0.333333	0	0.571429	-0.714286	0.0731707	0.888889	0.44	0.333333	0	-0.636364	0.642857
										0.76	0.210526	0.5	0.217391	0.894737	0.5	0.333333	-0.611111	-0.871795	0.333333	0.303371	-0.2	-0.333333	-0.555556	0.481482	0.333333	0.666667	-0.5	-0.25	0.142857	-0.454545	-0.166667	0.375	-0.142857	0	0	0.25	-0.666667	-0.0769231	0.333333	0	0.571429	-0.714286	0.0731707	0.888889	0.44	0.333333	0	-0.636364	0.642857
										0.76	0.210526	0.5	0.217391	0.894737	0.5	0.333333	-0.611111	-0.871795	0.333333	0.340425	-0.2	-0.333333	-0.555556	0.481482	0.333333	0.666667	-0.5	-0.25	0.142857	-0.454545	-0.166667	0.375	-0.142857	0	0	0.25	-0.666667	-0.0769231	0.333333	0	0.571429	-0.714286	0.0731707	0.904762	0.44	0.333333	0	-0.636364	0.642857
										0.76	0.210526	0.5	0.217391	0.894737	0.5	0.333333	-0.611111	-0.871795	0.333333	0.340425	-0.2	-0.333333	-0.555556	0.481482	0.333333	0.666667	-0.5	-0.25	0.142857	-0.454545	-0.166667	0.375	-0.142857	0	0	0.25	-0.666667	-0.0769231	0.333333	0	0.571429	-0.714286	0.0731707	0.904762	0.44	0.333333	0	-0.636364	0.642857
										0.76	0.210526	0.5	0.217391	0.894737	0.5	0.333333	-0.611111	-0.871795	0.333333	0.347368	-0.2	-0.333333	-0.555556	0.481482	0.333333	0.666667	-0.5	-0.25	0.142857	-0.454545	-0.166667	0.375	-0.142857	0	0	0.25	-0.666667	-0.0769231	0.333333	0	0.571429	-0.714286	0.0731707	0.904762	0.44	0.333333	0	-0.636364	0.642857
										0.76	0.210526	0.5	0.217391	0.894737	0.5	0.333333	-0.611111	-0.873418	0.333333	0.347368	-0.2	-0.333333	-0.555556	0.481482	0.333333	0.666667	-0.5	-0.25	0.142857	-0.454545	-0.166667	0.375	-0.142857	0	0	0.25	-0.666667	-0.0769231	0.333333	0	0.571429	-0.714286	0.0731707	0.904762	0.44	0.333333	0	-0.636364	0.642857
										0.76	0.210526	0.5	0.217391	0.894737	0.5	0.333333	-0.611111	-0.873418	0.333333	0.347368	-0.2	-0.333333	-0.555556	0.481482	0.333333	0.666667	-0.5	-0.25	0.142857	-0.454545	-0.166667	0.375	-0.142857	0	0	0.25	-0.714286	-0.0769231	0.333333	0	0.571429	-0.714286	0.0731707	0.913044	0.44	0.333333	0	-0.636364	0.642857
										0.76	0.210526	0.5	0.217391	0.894737	0.5	0.333333	-0.611111	-0.873418	0.333333	0.347368	-0.2	-0.333333	-0.555556	0.481482	0.333333	0.666667	-0.5	-0.25	0.142857	-0.454545	-0.166667	0.375	-0.142857	0	0	0.25	-0.714286	-0.0769231	0.333333	0	0.571429	-0.714286	0.0731707	0.916667	0.44	0.333333	0	-0.44	0.642857
										0.76	0.210526	0.5	0.217391	0.894737	0.5	0.333333	-0.611111	-0.873418	0.333333	0.347368	-0.2	-0.333333	-0.555556	0.481482	0.333333	0.666667	-0.5	-0.25	0.142857	-0.454545	-0.166667	0.375	-0.142857	0	0	0.25	-0.714286	-0.0769231	0.333333	0	0.571429	-0.714286	0.0731707	0.916667	0.44	0.333333	0	-0.44	0.642857
										0.76	0.210526	0.5	0.217391	0.894737	0.5	0.333333	-0.611111	-0.873418	0.333333	0.347368	-0.2	-0.333333	-0.555556	0.481482	0.333333	0.666667	-0.5	-0.25	0.142857	-0.454545	-0.166667	0.375	-0.142857	0	0	0.25	-0.714286	-0.0769231	0.333333	0	0.571429	-0.714286	0.0731707	0.916667	0.44	0.333333	0	-0.44	0.642857
										0.76	0.210526	0.5	0.217391	0.894737	0.5	0.333333	-0.611111	-0.873418	0.333333	0.333333	-0.2	-0.333333	-0.555556	0.481482	0.333333	0.666667	-0.5	-0.25	0.142857	-0.454545	-0.166667	0.375	-0.142857	0	0	0.25	-0.714286	-0.0769231	0.333333	0	0.571429	-0.714286	0.0731707	0.92	0.44	0.333333	0	-0.44	0.642857
										0.76	0.210526	0.5	0.217391	0.894737	0.5	0.333333	-0.611111	-0.873418	0.333333	0.242718	-0.2	-0.333333	-0.555556	0.481482	0.333333	0.666667	-0.5	-0.25	0.142857	-0.454545	-0.166667	0.375	-0.142857	0	0	0.25	-0.714286	-0.0769231	0.333333	0	0.571429	-0.714286	0.0731707	0.923077	0.44	0.333333	0	-0.44	0.642857
										0.76	0.210526	0.5	0.217391	0.894737	0.5	0.333333	-0.611111	-0.873418	0.333333	0.219048	-0.2	-0.333333	-0.555556	0.481482	0.333333	0.666667	-0.5	-0.25	0.142857	-0.454545	-0.166667	0.375	-0.142857	0	0	0.25	-0.714286	-0.0769231	0.333333	0	0.571429	-0.714286	0.0731707	0.925926	0.44	0.333333	0	-0.44	0.642857
										0.76	0.210526	0.5	0.217391	0.894737	0.5	0.333333	-0.611111	-0.873418	0.333333	0.219048	-0.2	-0.333333	-0.555556	0.481482	0.333333	0.666667	-0.5	-0.25	0.142857	-0.454545	-0.166667	0.375	-0.142857	0	0	0.25	-0.714286	-0.0769231	0.333333	0	0.571429	-0.714286	0.0731707	0.925926	0.44	0.333333	0	-0.44	0.642857
										0.76	0.210526	0.5	0.217391	0.894737	0.5	0.333333	-0.611111	-0.873418	0.333333	0.219048	-0.2	-0.333333	-0.555556	0.481482	0.333333	0.666667	-0.5	-0.25	0.142857	-0.454545	-0.166667	0.375	-0.142857	0	0	0.25	-0.714286	-0.0769231	0.333333	0	0.571429	-0.714286	0.0731707	0.928571	0.44	0.333333	0	-0.44	0.642857
										0.76	0.210526	0.5	0.217391	0.894737	0.5	0.333333	-0.611111	-0.873418	0.333333	0.219048	-0.2	-0.333333	-0.555556	0.481482	0.333333	0.705882	-0.5	-0.25	0.142857	-0.454545	-0.166667	0.375	-0.142857	0	0	0.25	-0.714286	-0.0769231	0.333333	0	0.571429	-0.714286	0.0731707	0.931034	0.44	0.333333	0	-0.44	0.642857
										0.76	0.210526	0.5	0.217391	0.894737	0.5	0.333333	-0.611111	-0.873418	0.333333	0.219048	-0.2	-0.333333	-0.555556	0.481482	0.333333	0.705882	-0.5	-0.25	0.142857	-0.454545	-0.166667	0.375	-0.142857	0	0	0.25	-0.714286	-0.0769231	0.333333	0	0.571429	-0.75	0.0731707	0.933333	0.44	0.333333	0	-0.44	0.642857
										0.76	0.210526	0.5	0.217391	0.894737	0.5	0.333333	-0.611111	-0.873418	0.333333	0.219048	-0.2	-0.333333	-0.555556	0.481482	0.333333	0.705882	-0.5	-0.25	0.142857	-0.454545	-0.166667	0.375	-0.142857	0	0	0.25	-0.714286	-0.0769231	0.333333	0	0.571429	-0.75	0.0731707	0.935484	0.44	0.333333	0	-0.44	0.642857
										0.76	0.210526	0.5	0.217391	0.894737	0.5	0.333333	-0.611111	-0.873418	0.333333	0.219048	-0.2	-0.333333	-0.555556	0.481482	0.333333	0.705882	-0.5	-0.25	0.142857	-0.454545	-0.166667	0.375	-0.142857	0	0	0.25	-0.714286	-0.0769231	0.333333	0	0.571429	-0.75	0.0731707	0.9375	0.44	0.333333	0	-0.44	0.642857
										0.76	0.210526	0.5	0.217391	0.894737	0.5	0.333333	-0.611111	-0.873418	0.333333	0.219048	-0.2	-0.333333	-0.555556	0.481482	0.333333	0.705882	-0.5	-0.25	0.142857	-0.454545	-0.166667	0.375	-0.142857	0	0	0.25	-0.714286	-0.0769231	0.333333	0	0.6	-0.75	0.0731707	0.9375	0.44	0.333333	0	-0.44	0.642857
										0.76	0.210526	0.5	0.217391	0.894737	0.5	0.333333	-0.611111	-0.873418	0.333333	0.219048	-0.2	-0.333333	-0.555556	0.481482	0.333333	0.705882	-0.5	-0.25	0.142857	-0.454545	-0.166667	0.375	-0.142857	0	0	0.25	-0.714286	-0.0769231	0.333333	0	0.666667	-0.75	0.0731707	0.939394	0.44	0.263158	0	-0.44	0.642857
										0.76	0.210526	0.5	0.217391	0.894737	0.5	0.333333	-0.611111	-0.873418	0.333333	0.219048	-0.2	-0.333333	-0.555556	0.481482	0.333333	0.705882	-0.5	-0.25	0.142857	-0.454545	-0.166667	0.375	-0.142857	0	0	0.25	-0.714286	-0.0769231	0.333333	0	0.714286	-0.75	0.0731707	0.939394	0.44	0.263158	0	-0.44	0.642857
										0.76	0.210526	0.5	0.217391	0.894737	0.5	0.333333	-0.611111	-0.873418	0.333333	0.219048	-0.2	-0.333333	-0.555556	0.481482	0.333333	0.705882	-0.5	-0.25	0.142857	-0.454545	-0.166667	0.375	-0.142857	0	0	0.25	-0.714286	-0.0769231	0.333333	0	0.76	-0.75	0.0731707	0.941176	0.44	0.263158	0	-0.44	0.642857
										0.76	0.210526	0.5	0.217391	0.894737	0.5	0.333333	-0.611111	-0.873418	0.333333	0.219048	-0.2	-0.333333	-0.555556	0.481482	0.333333	0.705882	-0.5	-0.25	0.142857	-0.454545	-0.166667	0.375	-0.142857	0	0	0.25	-0.714286	-0.0769231	0.333333	0	0.793103	-0.75	0.0731707	0.942857	0.44	0.263158	0	-0.44	0.642857
										0.76	0.210526	0.5	0.217391	0.894737	0.5	0.333333	-0.611111	-0.873418	0.333333	0.219048	-0.2	-0.333333	-0.555556	0.481482	0.333333	0.705882	-0.5	-0.25	0.142857	-0.454545	-0.166667	0.375	-0.142857	0	0	0.25	-0.714286	-0.0769231	0.333333	0	0.806452	-0.75	0.0731707	0.942857	0.44	0.263158	0	-0.44	0.642857
										0.76	0.210526	0.5	0.217391	0.894737	0.5	0.333333	-0.611111	-0.873418	0.333333	0.219048	-0.2	-0.333333	-0.555556	0.481482	0.333333	0.705882	-0.5	-0.25	0.142857	-0.454545	-0.166667	0.375	-0.142857	0	0	0.25	-0.714286	-0.0769231	0.333333	0	0.833333	-0.75	0.0731707	0.947368	0.44	0.263158	0	-0.44	0.642857
										0.76	0.210526	0.5	0.217391	0.894737	0.5	0.333333	-0.611111	-0.873418	0.333333	0.219048	-0.2	-0.333333	-0.555556	0.481482	0.333333	0.705882	-0.5	-0.25	0.142857	-0.454545	-0.166667	0.375	-0.142857	0	0	0.25	-0.714286	-0.0769231	0.333333	0	0.842105	-0.75	0.0731707	0.954545	0.44	0.263158	0	-0.44	0.642857
										0.76	0.210526	0.5	0.217391	0.894737	0.5	0.333333	-0.611111	-0.873418	0.333333	0.219048	-0.2	-0.333333	-0.555556	0.481482	0.333333	0.705882	-0.5	-0.25	0.142857	-0.454545	-0.166667	0.375	-0.142857	0	0	0.25	-0.714286	-0.0769231	0.333333	0	0.846154	-0.75	0.0731707	0.958333	0.44	0.263158	0	-0.44	0.642857
										0.76	0.210526	0.5	0.217391	0.894737	0.5	0.333333	-0.611111	-0.873418	0.333333	0.219048	-0.2	-0.333333	-0.555556	0.481482	0.333333	0.705882	-0.5	-0.368421	0.142857	-0.454545	-0.166667	0.375	-0.142857	0	0	0.25	-0.714286	-0.0769231	0.333333	0	0.846154	-0.75	0.0731707	0.960784	0.44	0.263158	0	-0.44	0.642857
										0.76	0.210526	0.5	0.217391	0.894737	0.5	0.333333	-0.611111	-0.873418	0.333333	0.219048	-0.2	-0.333333	-0.555556	0.481482	0.333333	0.705882	-0.5	-0.368421	0.142857	-0.454545	-0.166667	0.375	-0.142857	0	0	0.25	-0.714286	-0.0769231	0.333333	0	0.846154	-0.75	0.0731707	0.964912	0.44	0.263158	0	-0.44	0.642857
										0.76	0.210526	0.5	0.217391	0.894737	0.5	0.333333	-0.611111	-0.875	0.333333	0.219048	-0.2	-0.333333	-0.555556	0.481482	0.333333	0.705882	-0.5	-0.368421	0.142857	-0.454545	-0.166667	0.375	-0.142857	0	0	0.25	-0.714286	-0.0769231	0.333333	0	0.846154	-0.75	0.0731707	0.964912	0.44	0.263158	0	-0.44	0.642857
										0.76	0.210526	0.5	0.217391	0.894737	0.5	0.333333	-0.611111	-0.875	0.333333	0.219048	-0.2	-0.333333	-0.555556	0.481482	0.333333	0.705882	-0.5	-0.368421	0.142857	-0.454545	-0.166667	0.375	-0.142857	0	0	0.25	-0.714286	-0.0769231	0.333333	0	0.846154	-0.75	0.0731707	0.964912	0.44	0.263158	0	-0.44	0.642857
										0.76	0.210526	0.5	0.217391	0.894737	0.5	0.333333	-0.611111	-0.875	0.333333	0.219048	-0.2	-0.333333	-0.555556	0.481482	0.333333	0.705882	-0.5	-0.368421	0.142857	-0.454545	-0.166667	0.375	-0.142857	0	0	0.25	-0.714286	-0.0769231	0.333333	0	0.846154	-0.75	0.0731707	0.964912	0.44	0.263158	0	-0.44	0.642857
										0.76	0.210526	0.5	0.217391	0.894737	0.5	0.333333	-0.611111	-0.875	0.333333	0.219048	-0.2	-0.333333	-0.555556	0.481482	0.333333	0.705882	-0.5	-0.368421	0.142857	-0.454545	-0.166667	0.375	-0.142857	0	0	0.25	-0.714286	-0.0769231	0.333333	0	0.846154	-0.75	0.0731707	0.964912	0.44	0.263158	0	-0.44	0.642857
										0.76	0.210526	0.5	0.217391	0.894737	0.5	0.333333	-0.611111	-0.875	0.333333	0.219048	-0.2	-0.333333	-0.555556	0.481482	0.333333	0.705882	-0.5	-0.368421	0.142857	-0.454545	-0.166667	0.375	-0.142857	0	0	0.25	-0.714286	-0.0769231	0.333333	0	0.846154	-0.75	0.0731707	0.965517	0.44	0.263158	0	-0.44	0.642857
										0.76	0.210526	0.5	0.217391	0.894737	0.5	0.333333	-0.611111	-0.875	0.333333	0.219048	-0.2	-0.333333	-0.555556	0.481482	0.333333	0.705882	-0.5	-0.368421	0.142857	-0.454545	-0.166667	0.375	-0.142857	0	0	0.25	-0.714286	-0.0769231	0.333333	0	0.846154	-0.75	0.0731707	0.968254	0.44	0.263158	0	-0.44	0.642857
										0.76	0.210526	0.5	0.217391	0.894737	0.5	0.333333	-0.611111	-0.875	0.333333	0.219048	-0.2	-0.333333	-0.555556	0.481482	0.333333	0.705882	-0.5	-0.368421	0.172414	-0.454545	-0.166667	0.375	-0.142857	0	0	0.25	-0.714286	-0.0769231	0.333333	0	0.846154	-0.75	0.0731707	0.971015	0.44	0.263158	0	-0.44	0.642857
										0.76	0.210526	0.5	0.217391	0.894737	0.5	0.333333	-0.611111	-0.875	0.333333	0.219048	-0.2	-0.333333	-0.555556	0.481482	0.333333	0.705882	-0.5	-0.384615	0.172414	-0.454545	-0.166667	0.375	-0.142857	0	0	0.25	-0.714286	-0.0769231	0.333333	0	0.846154	-0.75	0.0731707	0.971015	0.44	0.263158	0	-0.44	0.642857
										0.76	0.210526	0.5	0.217391	0.894737	0.5	0.333333	-0.611111	-0.875	0.333333	0.219048	-0.2	-0.333333	-0.555556	0.481482	0.333333	0.705882	-0.5	-0.384615	0.172414	-0.454545	-0.166667	0.375	-0.142857	0	0.333333	0.25	-0.714286	-0.0769231	0.333333	0	0.846154	-0.75	0.0731707	0.971429	0.44	0.263158	0	-0.44	0.642857
										0.76	0.210526	0.5	0.217391	0.894737	0.5	0.333333	-0.611111	-0.875	0.333333	0.219048	-0.2	-0.333333	-0.555556	0.481482	0.333333	0.705882	-0.5	-0.384615	0.172414	-0.454545	-0.166667	0.375	-0.142857	0	0.333333	0.25	-0.714286	-0.0769231	0.333333	0	0.846154	-0.75	0.0731707	0.971429	0.44	0.263158	0	-0.44	0.642857
										0.76	0.210526	0.5	0.217391	0.894737	0.5	0.333333	-0.611111	-0.875	0.333333	0.219048	-0.2	-0.333333	-0.555556	0.481482	0.333333	0.705882	-0.5	-0.384615	0.172414	-0.454545	-0.166667	0.375	-0.142857	0	0.333333	0.25	-0.714286	-0.0769231	0.333333	0	0.846154	-0.75	0.0731707	0.971429	0.44	0.263158	0	-0.44	0.642857
										0.76	0.210526	0.5	0.217391	0.894737	0.5	0.333333	-0.611111	-0.875	0.333333	0.219048	-0.2	-0.333333	-0.555556	0.481482	0.333333	0.705882	-0.5	-0.384615	0.172414	-0.454545	-0.166667	0.375	-0.142857	0	0.333333	0.25	-0.714286	-0.0769231	0.333333	0	0.846154	-0.75	0.0731707	0.971429	0.44	0.2	0	-0.44	0.642857
										0.76	0.210526	0.5	0.217391	0.894737	0.5	0.333333	-0.611111	-0.875	0.333333	0.219048	-0.2	-0.333333	-0.555556	0.481482	0.333333	0.705882	-0.5	-0.35	0.172414	-0.454545	-0.166667	0.294118	-0.142857	0	0.333333	0.25	-0.714286	-0.0769231	0.333333	0	0.846154	-0.75	0.0731707	0.971429	0.44	0.2	0	-0.44	0.642857
										0.76	0.210526	0.5	0.217391	0.894737	0.5	0.333333	-0.611111	-0.875	0.333333	0.219048	-0.2	-0.333333	-0.555556	0.481482	0.333333	0.705882	-0.5	-0.35	0.172414	-0.454545	-0.166667	0.294118	-0.142857	0	0.333333	0.25	-0.714286	-0.0769231	0.333333	0	0.846154	-0.75	0.0731707	0.971429	0.44	0.2	0	-0.44	0.642857
										0.76	0.210526	0.5	0.217391	0.894737	0.5	0.333333	-0.611111	-0.875	0.333333	0.219048	-0.2	-0.333333	-0.555556	0.481482	0.333333	0.705882	-0.5	-0.35	0.172414	-0.454545	-0.166667	0.294118	-0.142857	0	0.333333	0.25	-0.714286	-0.0769231	0.333333	0	0.846154	-0.75	0.0731707	0.971429	0.44	0.2	0	-0.44	0.642857
										0.76	0.210526	0.5	0.217391	0.894737	0.5	0.333333	-0.611111	-0.875	0.333333	0.219048	-0.2	-0.333333	-0.555556	0.481482	0.333333	0.705882	-0.5	-0.35	0.172414	-0.454545	-0.166667	0.294118	-0.142857	0	0.333333	0.25	-0.714286	-0.0769231	0.333333	0	0.846154	-0.75	0.0731707	0.971429	0.44	0.2	0	-0.44	0.642857
										0.76	0.210526	0.5	0.217391	0.894737	0.5	0.333333	-0.611111	-0.875	0.333333	0.219048	-0.2	-0.333333	-0.555556	0.481482	0.333333	0.705882	-0.5	-0.35	0.172414	-0.454545	-0.166667	0.294118	-0.142857	0	0.333333	0.25	-0.714286	-0.0769231	0.333333	0	0.846154	-0.75	0.0731707	0.971429	0.44	0.2	0	-0.44	0.642857
										0.777778	0.210526	0.5	0.217391	0.894737	0.5	0.333333	-0.611111	-0.875	0.333333	0.219048	-0.2	-0.333333	-0.555556	0.481482	0.333333	0.705882	-0.5	-0.35	0.172414	-0.454545	-0.166667	0.294118	-0.142857	0	0.333333	0.25	-0.714286	-0.0769231	0.333333	0	0.846154	-0.75	0.0731707	0.971429	0.44	0.2	0	-0.44	0.642857
										0.785714	0.210526	0.5	0.217391	0.894737	0.5	0.333333	-0.611111	-0.875	0.333333	0.219048	-0.2	-0.333333	-0.555556	0.481482	0.333333	0.705882	-0.5	-0.35	0.172414	-0.454545	-0.166667	0.294118	-0.142857	0	0.333333	0.25	-0.714286	-0.0769231	0.333333	0	0.846154	-0.75	0.0731707	0.971429	0.44	0.2	0	-0.44	0.642857
										0.79661	0.210526	0.5	0.217391	0.894737	0.5	0.333333	-0.611111	-0.875	0.333333	0.219048	-0.2	-0.333333	-0.555556	0.481482	0.333333	0.705882	-0.5	-0.35	0.172414	-0.454545	-0.166667	0.294118	-0.142857	0	0.333333	0.25	-0.714286	-0.0769231	0.333333	0	0.846154	-0.75	0.0731707	0.971429	0.44	0.2	0	-0.461539	0.642857
										0.79661	0.210526	0.5	0.217391	0.894737	0.5	0.333333	-0.611111	-0.875	0.333333	0.219048	-0.2	-0.333333	-0.555556	0.481482	0.333333	0.705882	-0.5	-0.35	0.172414	-0.454545	-0.166667	0.294118	-0.142857	0	0.333333	0.25	-0.714286	-0.0769231	0.333333	0	0.846154	-0.75	0.0731707	0.971429	0.44	0.2	0	-0.461539	0.642857
										0.8	0.210526	0.5	0.217391	0.894737	0.5	0.333333	-0.611111	-0.875	0.333333	0.219048	-0.2	-0.333333	-0.555556	0.481482	0.333333	0.705882	-0.5	-0.35	0.172414	-0.454545	-0.166667	0.294118	-0.142857	0	0.333333	0.25	-0.714286	-0.0769231	0.333333	0	0.846154	-0.75	0.0731707	0.971429	0.44	0.2	0	-0.461539	0.677419
										0.8	0.210526	0.5	0.217391	0.894737	0.5	0.333333	-0.611111	-0.875	0.333333	0.219048	-0.2	-0.333333	-0.555556	0.481482	0.333333	0.705882	-0.5	-0.35	0.172414	-0.454545	-0.166667	0.294118	-0.142857	0	0.333333	0.25	-0.714286	-0.0769231	0.333333	0	0.846154	-0.75	0.0731707	0.971429	0.44	0.2	0	-0.461539	0.714286
										0.8	0.210526	0.5	0.217391	0.894737	0.5	0.333333	-0.611111	-0.875	0.333333	0.219048	-0.2	-0.333333	-0.555556	0.481482	0.333333	0.705882	-0.5	-0.35	0.172414	-0.454545	-0.166667	0.294118	-0.142857	0	0.333333	0.25	-0.714286	-0.0769231	0.333333	0	0.846154	-0.75	0.0731707	0.971429	0.44	0.2	0	-0.461539	0.767442
										0.8	0.210526	0.5	0.217391	0.894737	0.5	0.333333	-0.611111	-0.875	0.333333	0.219048	-0.2	-0.333333	-0.555556	0.481482	0.333333	0.705882	-0.5	-0.35	0.172414	-0.454545	-0.166667	0.294118	-0.142857	0	0.333333	0.25	-0.714286	-0.0769231	0.333333	0	0.846154	-0.75	0.0731707	0.971429	0.44	0.2	0	-0.461539	0.791667
										0.8	0.210526	0.5	0.217391	0.894737	0.5	0.333333	-0.611111	-0.875	0.333333	0.219048	-0.2	-0.333333	-0.555556	0.481482	0.333333	0.705882	-0.5	-0.35	0.172414	-0.454545	-0.166667	0.294118	-0.142857	0	0.333333	0.25	-0.714286	-0.0769231	0.333333	0	0.846154	-0.75	0.0731707	0.971429	0.44	0.2	0	-0.461539	0.791667
										0.8	0.210526	0.5	0.217391	0.894737	0.5	0.333333	-0.611111	-0.875	0.333333	0.219048	-0.2	-0.333333	-0.555556	0.481482	0.333333	0.705882	-0.5	-0.409091	0.172414	-0.454545	-0.166667	0.294118	-0.142857	0	0.333333	0.25	-0.714286	-0.0769231	0.333333	0	0.846154	-0.75	0.0731707	0.971429	0.44	0.2	0	-0.533333	0.791667
										0.8	0.210526	0.5	0.217391	0.894737	0.5	0.333333	-0.611111	-0.875	0.333333	0.219048	-0.2	-0.333333	-0.555556	0.481482	0.333333	0.705882	-0.5	-0.409091	0.172414	-0.454545	-0.166667	0.294118	-0.142857	0	0.333333	0.25	-0.714286	-0.0769231	0.333333	0	0.846154	-0.75	0.0731707	0.971429	0.44	0.2	0	-0.533333	0.791667
										0.8	0.210526	0.5	0.217391	0.894737	0.5	0.333333	-0.611111	-0.875	0.333333	0.219048	-0.2	-0.333333	-0.555556	0.454545	0.333333	0.705882	-0.5	-0.409091	0.172414	-0.454545	-0.166667	0.294118	-0.142857	0	0	0.25	-0.714286	-0.0769231	0.333333	0	0.846154	-0.75	0.0731707	0.971429	0.44	0.2	0	-0.533333	0.791667
										0.8	0.210526	0.5	0.217391	0.894737	0.5	0.333333	-0.611111	-0.875	0.333333	0.219048	-0.2	-0.333333	-0.555556	0.454545	0.333333	0.705882	-0.5	-0.409091	0.172414	-0.454545	-0.166667	0.294118	-0.142857	0	0	0.25	-0.714286	-0.0769231	0.333333	0	0.846154	-0.75	0.0731707	0.971429	0.44	0.2	0	-0.533333	0.791667
										0.8	0.210526	0.5	0.217391	0.894737	0.5	0.333333	-0.611111	-0.875	0.333333	0.219048	-0.2	-0.333333	-0.555556	0.454545	0.333333	0.705882	-0.5	-0.409091	0.172414	-0.454545	-0.166667	0.294118	-0.142857	0	0	0.25	-0.714286	-0.0769231	0.333333	0	0.846154	-0.75	0.0731707	0.971429	0.44	0.2	0	-0.533333	0.791667
										0.8	0.210526	0.5	0.217391	0.894737	0.5	0.333333	-0.611111	-0.875	0.333333	0.219048	-0.2	-0.333333	-0.555556	0.454545	0.333333	0.705882	-0.5	-0.409091	0.172414	-0.454545	-0.166667	0.294118	-0.142857	0	0	0.25	-0.714286	-0.0769231	0.333333	0	0.846154	-0.75	0.0731707	0.971429	0.44	0.2	0	-0.533333	0.791667
										0.8	0.210526	0.5	0.217391	0.894737	0.5	0.333333	-0.611111	-0.875	0.333333	0.219048	-0.2	-0.333333	-0.555556	0.454545	0.333333	0.705882	-0.5	-0.409091	0.172414	-0.454545	-0.166667	0.294118	-0.142857	0	0	0.25	-0.714286	-0.0769231	0	0	0.846154	-0.75	0.0731707	0.971429	0.44	0.2	0	-0.533333	0.791667
										0.8	0.210526	0.5	0.217391	0.894737	0.5	0.333333	-0.611111	-0.875	0.333333	0.219048	-0.2	-0.333333	-0.555556	0.454545	0.333333	0.705882	-0.5	-0.409091	0.172414	-0.454545	-0.166667	0.294118	-0.142857	0	0	0.25	-0.714286	-0.0769231	0	0	0.846154	-0.75	0.0731707	0.971429	0.44	0.2	0	-0.533333	0.791667
										0.8	0.210526	0.5	0.217391	0.894737	0.5	0.333333	-0.611111	-0.875	0.333333	0.219048	-0.2	-0.333333	-0.555556	0.454545	0.333333	0.705882	-0.5	-0.409091	0.172414	-0.454545	-0.166667	0.294118	-0.0666667	0	0	0.25	-0.714286	-0.0769231	0	0	0.846154	-0.75	0.0731707	0.971429	0.44	0.2	0	-0.533333	0.791667
										0.8	0.210526	0.5	0.217391	0.894737	0.5	0.333333	-0.611111	-0.875	0.333333	0.219048	-0.2	-0.333333	-0.555556	0.454545	0.333333	0.705882	-0.5	-0.409091	0.172414	-0.454545	-0.166667	0.294118	-0.0666667	0	0	0.25	-0.714286	-0.0769231	0	0	0.846154	-0.75	0.0731707	0.971429	0.44	0.2	0	-0.533333	0.791667
										0.8	0.210526	0.5	0.217391	0.894737	0.5	0.333333	-0.611111	-0.875	0.333333	0.219048	-0.2	-0.333333	-0.555556	0.454545	0.333333	0.705882	-0.5	-0.409091	0.172414	-0.454545	-0.166667	0.294118	-0.0666667	0	0	0.25	-0.714286	-0.0769231	0	0	0.846154	-0.75	0.0731707	0.971429	0.44	0.2	0	-0.533333	0.791667
										0.8	0.210526	0.5	0.217391	0.894737	0.5	0.333333	-0.611111	-0.875	0.333333	0.219048	-0.2	-0.333333	-0.555556	0.454545	0.333333	0.705882	-0.5	-0.409091	0.172414	-0.454545	-0.166667	0.294118	-0.0666667	0	0	0.25	-0.714286	-0.0769231	0	0	0.846154	-0.75	0.0731707	0.971429	0.44	0.2	0	-0.533333	0.791667
										0.8	0.210526	0.5	0.217391	0.894737	0.5	0.333333	-0.611111	-0.875	0.333333	0.219048	-0.2	-0.333333	-0.555556	0.454545	0.333333	0.705882	-0.5	-0.409091	0.172414	-0.454545	-0.166667	0.294118	-0.0666667	0	0	0.25	-0.714286	-0.0769231	0	0	0.846154	-0.75	0.0731707	0.971429	0.44	0.2	0	-0.533333	0.791667
										0.8	0.210526	0.5	0.217391	0.894737	0.5	0.333333	-0.611111	-0.875	0.333333	0.226415	-0.2	-0.333333	-0.555556	0.454545	0.333333	0.705882	-0.5	-0.409091	0.172414	-0.454545	-0.166667	0.294118	-0.0666667	0	0	0.25	-0.714286	-0.0769231	0	0	0.846154	-0.75	0.0731707	0.971429	0.44	0.2	0	-0.533333	0.791667
										0.8	0.210526	0.5	0.217391	0.894737	0.5	0.333333	-0.611111	-0.875	0.333333	0.226415	-0.2	-0.333333	-0.555556	0.454545	0.333333	0.705882	-0.5	-0.409091	0.172414	-0.454545	-0.166667	0.294118	-0.0666667	0	0	0.25	-0.714286	-0.0769231	0	0	0.846154	-0.75	0.0731707	0.971429	0.44	0.2	0	-0.533333	0.791667
										0.8	0.210526	0.5	0.217391	0.894737	0.5	0.333333	-0.611111	-0.875	0.333333	0.226415	-0.2	-0.333333	-0.555556	0.454545	0.333333	0.705882	-0.5	-0.409091	0.172414	-0.454545	-0.166667	0.294118	-0.0666667	0	0	0.25	-0.714286	-0.0769231	0	0	0.846154	-0.75	0.0731707	0.971429	0.44	0.2	0	-0.533333	0.791667
										0.8	0.210526	0.5	0.217391	0.894737	0.5	0.333333	-0.611111	-0.875	0.333333	0.226415	-0.2	-0.333333	-0.555556	0.454545	0.333333	0.705882	-0.5	-0.409091	0.172414	-0.454545	-0.166667	0.294118	-0.0666667	0	0	0.25	-0.714286	-0.0769231	0	0	0.846154	-0.75	0.0731707	0.971429	0.44	0.2	0	-0.533333	0.791667
										0.8	0.210526	0.5	0.217391	0.894737	0.5	0.333333	-0.611111	-0.875	0.333333	0.226415	-0.2	-0.333333	-0.555556	0.454545	0.333333	0.705882	-0.5	-0.409091	0.172414	-0.454545	-0.166667	0.294118	-0.0666667	0	0	0.25	-0.714286	-0.0769231	0	0	0.846154	-0.75	0.0731707	0.971429	0.44	0.2	0	-0.533333	0.791667
										0.8	0.210526	0.5	0.217391	0.894737	0.5	0.333333	-0.611111	-0.875	0.333333	0.226415	-0.2	-0.333333	-0.555556	0.454545	0.333333	0.705882	-0.5	-0.409091	0.172414	-0.454545	-0.166667	0.294118	-0.0666667	0	0	0.25	-0.714286	-0.0769231	0	0	0.846154	-0.75	0.0731707	0.971429	0.44	0.2	0	-0.533333	0.791667
										0.8	0.210526	0.5	0.217391	0.894737	0.5	0.333333	-0.611111	-0.875	0.333333	0.226415	-0.2	-0.333333	-0.555556	0.454545	0.333333	0.705882	-0.5	-0.409091	0.172414	-0.454545	-0.166667	0.294118	-0.0666667	0	0	0.25	-0.714286	-0.0769231	0	0	0.846154	-0.75	0.0731707	0.971429	0.44	0.2	0	-0.533333	0.791667
										0.8	0.210526	0.5	0.217391	0.894737	0.5	0.333333	-0.611111	-0.875	0.333333	0.226415	-0.2	-0.333333	-0.555556	0.454545	0.333333	0.705882	-0.5	-0.409091	0.172414	-0.454545	-0.166667	0.294118	-0.0666667	0	0	0.25	-0.714286	-0.0769231	0	0	0.846154	-0.75	0.0731707	0.971429	0.44	0.2	0	-0.533333	0.791667
										0.8	0.210526	0.5	0.217391	0.894737	0.5	0.333333	-0.611111	-0.875	0.333333	0.226415	-0.2	-0.333333	-0.555556	0.454545	0.333333	0.705882	-0.5	-0.409091	0.172414	-0.454545	-0.166667	0.294118	-0.0666667	0	0	0.25	-0.714286	-0.0769231	0	0	0.846154	-0.75	0.0731707	0.971429	0.44	0.2	0	-0.533333	0.791667
										0.8	0.210526	0.5	0.217391	0.894737	0.5	0.333333	-0.611111	-0.875	0.333333	0.226415	-0.2	-0.333333	-0.555556	0.454545	0.333333	0.705882	-0.5	-0.409091	0.172414	-0.454545	-0.166667	0.294118	-0.0666667	0	0	0.25	-0.714286	-0.0769231	0	0	0.846154	-0.75	0.0731707	0.971429	0.44	0.2	0	-0.533333	0.791667
										0.8	0.210526	0.5	0.217391	0.894737	0.5	0.333333	-0.611111	-0.875	0.333333	0.226415	-0.2	-0.333333	-0.555556	0.454545	0.333333	0.705882	-0.5	-0.409091	0.172414	-0.454545	-0.166667	0.294118	-0.0666667	0	0	0.25	-0.714286	-0.0769231	0	0	0.846154	-0.75	0.0731707	0.971429	0.44	0.2	0	-0.533333	0.791667
										0.8	0.210526	0.5	0.217391	0.894737	0.5	0.333333	-0.611111	-0.875	0.333333	0.226415	-0.2	-0.333333	-0.555556	0.454545	0.333333	0.705882	-0.5	-0.409091	0.172414	-0.454545	-0.166667	0.294118	-0.0666667	0	0	0.25	-0.714286	-0.0769231	0	0	0.846154	-0.75	0.0731707	0.971429	0.44	0.2	0	-0.533333	0.791667
										0.8	0.210526	0.5	0.217391	0.894737	0.5	0.333333	-0.611111	-0.875	0.333333	0.226415	-0.2	-0.333333	-0.555556	0.454545	0.333333	0.705882	-0.5	-0.409091	0.172414	-0.454545	-0.166667	0.294118	-0.0666667	0	0	0.25	-0.714286	-0.0769231	0	0	0.846154	-0.75	0.0731707	0.971429	0.44	0.2	0	-0.533333	0.791667
										0.8	0.210526	0.5	0.217391	0.894737	0.5	0.333333	-0.611111	-0.875	0.333333	0.226415	-0.2	-0.333333	-0.555556	0.454545	0.333333	0.705882	-0.5	-0.409091	0.172414	-0.454545	-0.166667	0.294118	-0.0666667	0	0	0.25	-0.714286	-0.0769231	0	0	0.846154	-0.75	0.0731707	0.971429	0.44	0.2	0	-0.533333	0.791667
										0.8	0.210526	0.5	0.217391	0.894737	0.5	0.333333	-0.611111	-0.875	0.333333	0.226415	-0.2	-0.333333	-0.555556	0.454545	0.333333	0.705882	-0.5	-0.409091	0.172414	-0.454545	-0.166667	0.294118	-0.0666667	0	0	0.25	-0.714286	-0.0769231	0	0	0.846154	-0.75	0.0731707	0.971429	0.44	0.2	0	-0.533333	0.791667
										0.8	0.210526	0.5	0.217391	0.894737	0.5	0.333333	-0.611111	-0.875	0.333333	0.226415	-0.2	-0.333333	-0.555556	0.454545	0.333333	0.705882	-0.5	-0.409091	0.172414	-0.454545	-0.166667	0.294118	-0.0666667	0	0	0.25	-0.714286	-0.0769231	0	0	0.846154	-0.75	0.0731707	0.971429	0.44	0.2	0	-0.533333	0.791667
										0.8	0.210526	0.5	0.217391	0.894737	0.5	0.333333	-0.611111	-0.876543	0.333333	0.226415	-0.2	-0.333333	-0.555556	0.454545	0.333333	0.705882	-0.5	-0.409091	0.172414	-0.454545	-0.166667	0.294118	-0.0666667	0	0	0.25	-0.714286	-0.0769231	0	0	0.846154	-0.75	0.0731707	0.971429	0.44	0.2	0	-0.533333	0.791667
										0.8	0.210526	0.5	0.217391	0.894737	0.5	0.333333	-0.611111	-0.876543	0.333333	0.226415	-0.2	-0.333333	-0.555556	0.454545	0.333333	0.705882	-0.5	-0.409091	0.172414	-0.454545	-0.166667	0.294118	-0.0666667	0	0	0.25	-0.714286	-0.0769231	0	0	0.846154	-0.75	0.0731707	0.971429	0.44	0.2	0	-0.533333	0.791667
										0.8	0.210526	0.5	0.217391	0.894737	0.5	0.333333	-0.611111	-0.876543	0.333333	0.226415	-0.2	-0.333333	-0.555556	0.454545	0.333333	0.705882	-0.5	-0.409091	0.225806	-0.454545	-0.166667	0.294118	-0.0666667	0	0	0.25	-0.714286	-0.0769231	0	0	0.846154	-0.75	0.0731707	0.971429	0.44	0.2	0	-0.533333	0.791667
										0.8	0.210526	0.5	0.217391	0.894737	0.5	0.333333	-0.611111	-0.876543	0.333333	0.226415	-0.2	-0.333333	-0.555556	0.454545	0.333333	0.705882	-0.5	-0.409091	0.351351	-0.454545	-0.166667	0.294118	-0.0666667	0	0	0.25	-0.714286	-0.0769231	0	0	0.846154	-0.75	0.0731707	0.971429	0.44	0.2	0	-0.533333	0.791667
										0.8	0.210526	0.5	0.217391	0.894737	0.5	0.333333	-0.611111	-0.876543	0.333333	0.226415	-0.2	-0.333333	-0.555556	0.454545	0.333333	0.705882	-0.5	-0.409091	0.351351	-0.454545	-0.166667	0.294118	0.0588235	0	0	0.25	-0.714286	-0.0769231	0	0	0.846154	-0.75	0.0731707	0.971429	0.44	0.2	0	-0.533333	0.791667
										0.8	0.210526	0.5	0.217391	0.894737	0.5	0.333333	-0.611111	-0.876543	0.333333	0.214953	-0.2	-0.333333	-0.555556	0.454545	0.333333	0.705882	-0.5	-0.409091	0.368421	-0.454545	-0.166667	0.294118	0.304348	0	0	0.25	-0.714286	-0.0769231	0	0	0.846154	-0.75	0.0731707	0.971429	0.44	0.2	0	-0.533333	0.791667
										0.8	0.210526	0.5	0.217391	0.894737	0.5	0.333333	-0.611111	-0.876543	0.333333	0.214953	-0.2	-0.333333	-0.555556	0.454545	0.333333	0.705882	-0.5	-0.409091	0.368421	-0.454545	-0.166667	0.294118	0.36	0	0	0.25	-0.714286	-0.0769231	0	0	0.846154	-0.75	0.0731707	0.971429	0.44	0.2	0	-0.548387	0.791667
										0.8	0.210526	0.5	0.217391	0.894737	0.5	0.333333	-0.611111	-0.876543	0.333333	0.214953	-0.2	-0.333333	-0.555556	0.454545	0.333333	0.705882	-0.5	-0.409091	0.368421	-0.454545	-0.166667	0.294118	0.36	0	0	0.25	-0.714286	-0.0769231	0	0	0.846154	-0.75	0.0731707	0.971429	0.44	0.2	0	-0.548387	0.791667
										0.8	0.210526	0.5	0.217391	0.894737	0.5	0.333333	-0.611111	-0.876543	0.333333	0.214953	-0.2	-0.333333	-0.555556	0.454545	0.333333	0.705882	-0.5	-0.377778	0.368421	-0.454545	-0.166667	0.294118	0.36	0	-0.2	0.25	-0.714286	-0.0769231	0	0	0.846154	-0.75	0.0731707	0.971429	0.44	0.2	0	-0.548387	0.791667
										0.8	0.210526	0.5	0.217391	0.894737	0.5	0.333333	-0.611111	-0.878049	0.333333	0.214953	-0.2	-0.333333	-0.555556	0.454545	0.333333	0.705882	-0.5	-0.215686	0.368421	-0.454545	-0.166667	0.294118	0.36	0	-0.2	0.25	-0.714286	-0.0769231	0	0	0.846154	-0.75	0.0731707	0.971429	0.44	0.2	0	-0.548387	0.791667
										0.8	0.210526	0.5	0.217391	0.894737	0.5	0.333333	-0.611111	-0.879518	0.333333	0.203704	-0.2	-0.333333	-0.555556	0.454545	0.333333	0.705882	-0.5	-0.0508475	0.368421	-0.454545	-0.166667	0.294118	0.36	0	-0.2	0.25	-0.714286	-0.0769231	0	0	0.846154	-0.75	0.0731707	0.971429	0.44	0.2	0	-0.548387	0.791667
										0.8	0.210526	0.5	0.217391	0.894737	0.5	0.333333	-0.611111	-0.879518	0.333333	0.203704	-0.2	-0.333333	-0.555556	0.454545	0.333333	0.705882	-0.5	0	0.368421	-0.454545	-0.166667	0.294118	0.36	0	-0.2	0.25	-0.714286	-0.0769231	0	0	0.846154	-0.75	0.0731707	0.971429	0.44	0.2	0	-0.548387	0.791667
										0.8	0.210526	0.5	0.217391	0.894737	0.5	0.333333	-0.611111	-0.879518	0.333333	0.203704	-0.2	-0.333333	-0.555556	0.454545	0.333333	0.705882	-0.5	0.015873	0.368421	-0.454545	-0.166667	0.294118	0.36	0	-0.2	0.25	-0.714286	-0.0769231	0	0	0.846154	-0.75	0.0731707	0.971429	0.44	0.2	0	-0.548387	0.791667
										0.8	0.210526	0.5	0.217391	0.894737	0.5	0.333333	-0.611111	-0.879518	0.333333	0.181818	-0.2	-0.333333	-0.555556	0.454545	0.333333	0.705882	-0.5	0.015873	0.368421	-0.454545	-0.166667	0.294118	0.36	0	-0.2	0.25	-0.714286	-0.0769231	0	0	0.846154	-0.75	0.0731707	0.971429	0.44	0.2	0	-0.548387	0.791667
										0.8	0.210526	0.5	0.217391	0.894737	0.5	0.333333	-0.611111	-0.879518	0.333333	0.181818	-0.2	-0.333333	-0.555556	0.454545	0.333333	0.705882	-0.5	0.015873	0.368421	-0.454545	-0.166667	0.294118	0.36	0	-0.2	0.25	-0.714286	-0.0769231	0	0	0.846154	-0.75	0.0731707	0.971429	0.44	0.2	0	-0.548387	0.791667
										0.8	0.210526	0.5	0.217391	0.894737	0.5	0.333333	-0.611111	-0.879518	0.333333	0.181818	-0.2	-0.333333	-0.555556	0.454545	0.333333	0.705882	-0.5	0.126761	0.368421	-0.454545	-0.166667	0.294118	0.36	0	-0.2	0.25	-0.714286	-0.0769231	0	0	0.846154	-0.75	0.0731707	0.971429	0.44	0.2	0	-0.548387	0.791667
										0.8	0.210526	0.5	0.217391	0.894737	0.5	0.333333	-0.611111	-0.879518	0.333333	0.181818	-0.2	-0.333333	-0.555556	0.454545	0.333333	0.705882	-0.5	0.18421	0.268293	-0.454545	-0.166667	0.294118	0.36	0	-0.333333	0.25	-0.714286	-0.0769231	0	0	0.846154	-0.75	0.0731707	0.971429	0.44	0.2	0	-0.548387	0.791667
										0.8	0.210526	0.5	0.217391	0.894737	0.5	0.333333	-0.611111	-0.879518	0.333333	0.181818	-0.2	-0.333333	-0.555556	0.454545	0.333333	0.705882	-0.5	0.18421	0.155556	-0.454545	-0.166667	0.294118	0.36	0	-0.333333	0.25	-0.714286	-0.0769231	0	0	0.846154	-0.75	0.0731707	0.971429	0.44	0.2	0	-0.548387	0.791667
										0.8	0.210526	0.5	0.217391	0.894737	0.5	0.333333	-0.611111	-0.879518	0.333333	0.111111	-0.2	-0.333333	-0.555556	0.454545	0.333333	0.705882	-0.5	0.194805	0.155556	-0.454545	-0.166667	0.294118	0.36	0	-0.333333	0.25	-0.714286	-0.0769231	0	0	0.846154	-0.75	0.0731707	0.971429	0.44	0.2	0	-0.548387	0.791667
										0.8	0.210526	0.5	0.217391	0.894737	0.5	0.333333	-0.611111	-0.879518	0.333333	0.092437	-0.2	-0.333333	-0.555556	0.454545	0.333333	0.705882	-0.5	0.194805	0.155556	-0.454545	-0.166667	0.294118	0.36	0.5	-0.333333	0.25	-0.714286	-0.0769231	0	0	0.846154	-0.75	0.0731707	0.971429	0.44	0.2	0	-0.548387	0.791667
										0.8	0.210526	0.5	0.217391	0.894737	0.5	0.333333	-0.611111	-0.879518	0.333333	0.092437	-0.2	-0.333333	-0.555556	0.454545	0.333333	0.705882	-0.5	0.194805	0.155556	-0.454545	-0.166667	0.294118	0.36	0.5	-0.333333	0.25	-0.714286	-0.0769231	0	0	0.846154	-0.75	0.0731707	0.971429	0.44	0.2	0	-0.548387	0.791667
										0.8	0.210526	0.5	0.217391	0.894737	0.5	0.333333	-0.611111	-0.879518	0.333333	0.0569106	-0.2	-0.333333	-0.555556	0.454545	0.333333	0.705882	-0.5	0.194805	0.155556	-0.454545	-0.166667	0.294118	0.36	0.5	-0.333333	0.25	-0.714286	-0.0769231	0	0	0.846154	-0.75	0.0731707	0.971429	0.44	0.2	0	-0.548387	0.791667
										0.8	0.210526	0.5	0.217391	0.894737	0.5	0.333333	-0.611111	-0.879518	0.333333	0.00775194	-0.2	-0.333333	-0.555556	0.454545	0.333333	0.705882	-0.5	0.194805	0.155556	-0.454545	-0.166667	0.294118	0.36	0.5	-0.333333	0.25	-0.714286	-0.0769231	0	0	0.846154	-0.75	0.0731707	0.971429	0.44	0.2	0	-0.548387	0.791667
										0.8	0.210526	0.5	0.217391	0.894737	0.5	0.333333	-0.611111	-0.879518	0.333333	-0.0076336	-0.2	-0.333333	-0.555556	0.454545	0.333333	0.705882	-0.5	0.253012	0.155556	-0.454545	-0.166667	0.294118	0.36	0.5	-0.333333	0.25	-0.714286	-0.2	0	0	0.846154	-0.75	0.0731707	0.971429	0.44	0.2	0	-0.548387	0.791667
										0.8	0.210526	0.5	0.217391	0.894737	0.5	0.333333	-0.611111	-0.879518	0.333333	-0.0298507	-0.2	-0.333333	-0.555556	0.403509	0.333333	0.705882	-0.5	0.287356	0.155556	-0.454545	-0.166667	0.294118	0.36	0.5	-0.333333	0.25	-0.714286	-0.2	0	0	0.846154	-0.75	0.0731707	0.971429	0.44	0.2	0	-0.548387	0.791667
										0.8	0.210526	0.5	0.217391	0.894737	0.5	0.333333	-0.611111	-0.879518	0.5	-0.0647482	-0.2	-0.333333	-0.555556	0.403509	0.333333	0.705882	-0.5	0.287356	0.155556	-0.454545	-0.166667	0.294118	0.36	0.5	-0.333333	0.25	-0.714286	-0.2	0	0	0.846154	-0.75	0.0731707	0.971429	0.44	0.2	0	-0.548387	0.791667
										0.8	0.210526	0.5	0.217391	0.894737	0.5	0.333333	-0.611111	-0.879518	0.5	-0.084507	-0.2	-0.333333	-0.555556	0.403509	0.333333	0.705882	-0.5	0.295455	0.155556	-0.454545	-0.166667	0.294118	0.36	0.5	-0.333333	0.25	-0.714286	-0.2	0	0	0.846154	-0.75	0.0731707	0.971429	0.44	0.2	0	-0.548387	0.791667
										0.8	0.210526	0.5	0.217391	0.894737	0.5	0.333333	-0.611111	-0.880952	0.5	-0.0909091	-0.2	-0.333333	-0.555556	0.403509	0.333333	0.705882	-0.5	0.295455	0.155556	-0.454545	-0.166667	0.294118	0.36	0.5	-0.333333	0.25	-0.714286	-0.2	0	0	0.846154	-0.75	0.0731707	0.971429	0.44	0.2	0	-0.548387	0.791667
										0.8	0.210526	0.5	0.217391	0.894737	0.5	0.333333	-0.611111	-0.880952	0.5	-0.0972222	-0.2	-0.333333	-0.555556	0.403509	0.333333	0.705882	-0.5	0.295455	0.155556	-0.454545	-0.166667	0.294118	0.36	0.5	-0.333333	0.25	-0.714286	-0.2	0	0	0.846154	-0.75	0.0731707	0.971429	0.44	0.2	0	-0.548387	0.791667
										0.8	0.210526	0.5	0.217391	0.894737	0.5	0.333333	-0.611111	-0.880952	0.5	-0.0972222	-0.2	-0.333333	-0.555556	0.403509	0.333333	0.705882	-0.5	0.295455	0.155556	-0.454545	-0.166667	0.294118	0.36	0.5	-0.333333	0.25	-0.714286	-0.2	0	0	0.846154	-0.75	0.0731707	0.971429	0.44	0.2	0	-0.548387	0.791667
										0.8	0.210526	0.5	0.217391	0.894737	0.5	0.333333	-0.611111	-0.880952	0.5	-0.109589	-0.2	-0.333333	-0.555556	0.403509	0.333333	0.705882	-0.5	0.295455	0.155556	-0.454545	-0.166667	0.294118	0.36	0.5	-0.333333	0.25	-0.714286	-0.2	0	0	0.846154	-0.75	0.0731707	0.971429	0.44	0.2	0	-0.548387	0.791667
										0.8	0.210526	0.5	0.217391	0.894737	0.5	0.333333	-0.611111	-0.880952	0.5	-0.121622	-0.2	-0.333333	-0.555556	0.403509	0.333333	0.705882	-0.5	0.295455	0.155556	-0.454545	-0.166667	0.294118	0.36	0.5	-0.333333	0.25	-0.714286	-0.2	0	0	0.846154	-0.75	0.0731707	0.971429	0.44	0.2	0	-0.371429	0.791667
										0.8	0.210526	0.5	0.166667	0.894737	0.5	0.333333	-0.611111	-0.880952	0.5	-0.133333	-0.2	-0.333333	-0.555556	0.403509	0.333333	0.705882	-0.5	0.295455	0.155556	-0.454545	-0.166667	0.294118	0.36	0.5	-0.333333	0.25	-0.714286	-0.2	0	0	0.846154	-0.75	0.0731707	0.971429	0.44	0.2	0	-0.142857	0.791667
										0.8	0.210526	0.5	0.166667	0.894737	0.5	0.333333	-0.611111	-0.880952	0.5	-0.16129	-0.2	-0.333333	-0.555556	0.403509	0.333333	0.705882	-0.5	0.295455	0.155556	-0.454545	-0.166667	0.294118	0.36	0.5	-0.333333	0.25	-0.714286	-0.2	0	0	0.846154	-0.75	0.0731707	0.971429	0.44	0.2	0	-0.0434783	0.791667
										0.8	0.210526	0.5	0.166667	0.894737	0.5	0.333333	-0.611111	-0.880952	0.5	-0.177215	-0.2	-0.333333	-0.555556	0.403509	0.333333	0.705882	-0.5	0.295455	0.155556	-0.454545	-0.166667	0.294118	0.36	0.5	-0.333333	0.25	-0.714286	-0.2	0	0	0.846154	-0.75	0.0731707	0.971429	0.44	0.2	0	-0.0434783	0.791667
										0.8	0.210526	0.5	0.166667	0.894737	0.5	0.333333	-0.611111	-0.880952	0.5	-0.192547	-0.2	-0.333333	-0.555556	0.403509	0.333333	0.705882	-0.5	0.295455	0.155556	-0.454545	-0.166667	0.294118	0.36	0.5	-0.333333	0.25	-0.714286	-0.2	0	0	0.846154	-0.75	0.0731707	0.971429	0.44	0.2	0	-0.0212766	0.791667
										0.8	0.210526	0.5	0.166667	0.894737	0.5	0.333333	-0.611111	-0.880952	0.5	-0.202454	-0.2	-0.333333	-0.555556	0.403509	0.333333	0.705882	-0.5	0.295455	0.155556	-0.454545	-0.166667	0.294118	0.36	0.5	-0.333333	0.25	-0.714286	-0.2	0	0	0.846154	-0.75	0.0731707	0.971429	0.44	0.2	0	-0.0212766	0.791667
										0.8	0.210526	0.5	0.166667	0.894737	0.5	0.333333	-0.611111	-0.880952	0.5	-0.216867	-0.2	-0.333333	-0.555556	0.403509	0.333333	0.705882	-0.5	0.295455	0.155556	-0.454545	-0.166667	0.294118	0.36	0.5	-0.333333	0.454545	-0.714286	-0.2	0	0	0.846154	-0.75	0.0731707	0.971429	0.44	0.2	0	0	0.791667
										0.8	0.210526	0.5	0.166667	0.894737	0.5	0.333333	-0.611111	-0.880952	0.5	-0.22619	-0.2	-0.333333	-0.555556	0.403509	0.333333	0.705882	-0.5	0.295455	0.155556	-0.454545	-0.166667	0.294118	0.36	0.5	-0.333333	0.6	-0.714286	-0.2	0	0	0.846154	-0.75	0.0731707	0.971429	0.44	0.2	0	-0.0588235	0.791667
										0.8	0.210526	0.5	0.166667	0.894737	0.5	0.333333	-0.611111	-0.880952	0.5	-0.239766	-0.2	-0.333333	-0.555556	0.403509	0.333333	0.705882	-0.5	0.295455	0.155556	-0.454545	-0.166667	0.294118	0.36	0.5	-0.333333	0.6	-0.714286	-0.2	0	0	0.846154	-0.75	0.0731707	0.971429	0.44	0.2	0	-0.0588235	0.791667
										0.8	0.210526	0.5	0.166667	0.894737	0.5	0.333333	-0.611111	-0.880952	0.5	-0.244186	-0.2	-0.333333	-0.555556	0.403509	0.333333	0.705882	-0.5	0.295455	0.155556	-0.454545	-0.166667	0.294118	0.36	-0.4	-0.333333	0.6	-0.714286	-0.2	0	0	0.846154	-0.75	0.0731707	0.971429	0.44	0.2	0	-0.0588235	0.791667
										0.8	0.210526	0.5	0.166667	0.894737	0.5	0.333333	-0.611111	-0.880952	0.5	-0.261364	-0.2	-0.333333	-0.503356	0.403509	0.333333	0.705882	-0.5	0.295455	0.155556	-0.454545	-0.166667	0.294118	0.36	-0.4	-0.333333	0.6	-0.714286	-0.2	0	0	0.846154	-0.75	0.0731707	0.971429	0.44	0.2	0	-0.0588235	0.653846
										0.8	0.210526	0.5	0.166667	0.894737	0.5	0.333333	-0.611111	-0.880952	0.5	-0.261364	-0.2	-0.333333	-0.445161	0.403509	0.333333	0.705882	-0.5	0.295455	0.155556	-0.454545	-0.166667	0.294118	0.36	-0.4	-0.333333	0.6	-0.714286	-0.2	0	0	0.846154	-0.75	0.0731707	0.971429	0.44	0.2	0	-0.0588235	0.653846
										0.8	0.210526	0.5	0.166667	0.894737	0.5	0.333333	-0.611111	-0.880952	0.5	-0.273743	-0.2	-0.333333	-0.391304	0.403509	0.333333	0.705882	-0.5	0.295455	0.155556	-0.454545	-0.166667	0.294118	0.36	-0.4	-0.333333	0.6	-0.714286	-0.2	0	0	0.846154	-0.75	0.0731707	0.971429	0.44	0.2	0	-0.0588235	0.653846
										0.8	0.210526	0.5	0.166667	0.894737	0.5	0.333333	-0.611111	-0.880952	0.5	-0.281768	-0.2	-0.333333	-0.365854	0.403509	0.333333	0.705882	-0.5	0.295455	0.155556	-0.454545	-0.166667	0.294118	0.36	-0.4	-0.333333	0.6	-0.714286	-0.2	0	0	0.846154	-0.75	0.0731707	0.971429	0.44	0.2	0	-0.0588235	0.653846
										0.8	0.210526	0.5	0.166667	0.894737	0.5	0.333333	-0.611111	-0.880952	0.5	-0.293478	-0.2	-0.333333	-0.333333	0.403509	0.333333	0.705882	-0.5	0.295455	0.155556	-0.454545	-0.166667	0.294118	0.36	-0.4	-0.333333	0.6	-0.714286	-0.2	0	0	0.846154	-0.75	0.0731707	0.971429	0.44	0.2	0	-0.0588235	0.653846
										0.8	0.210526	0.5	0.166667	0.894737	0.5	0.333333	-0.611111	-0.880952	0.5	-0.308511	-0.2	-0.333333	-0.325444	0.403509	0.333333	0.705882	-0.5	0.295455	0.155556	-0.454545	-0.166667	0.294118	0.36	-0.4	-0.333333	0.6	-0.714286	-0.2	0	0	0.846154	-0.75	0.0731707	0.971429	0.44	0.2	0	-0.0588235	0.653846
										0.8	0.210526	0.5	0.166667	0.894737	0.5	0.333333	-0.611111	-0.880952	0.5	-0.308511	-0.2	-0.333333	-0.325444	0.403509	0.333333	0.705882	-0.5	0.295455	0.155556	-0.454545	-0.166667	0.294118	0.36	-0.4	-0.333333	0.6	-0.714286	-0.2	0	0	0.846154	-0.75	0.0731707	0.971429	0.44	0.2	0	-0.0588235	0.653846
										0.8	0.210526	0.5	0.166667	0.894737	0.5	0.333333	-0.611111	-0.880952	0.5	-0.308511	-0.2	-0.333333	-0.325444	0.403509	0.333333	0.705882	-0.5	0.295455	0.155556	-0.454545	-0.166667	0.294118	0.36	-0.4	-0.333333	0.6	-0.714286	-0.2	0	0	0.846154	-0.75	0.0731707	0.971429	0.44	0.2	0	-0.0588235	0.653846
										0.8	0.210526	0.5	0.166667	0.894737	0.5	0.333333	-0.611111	-0.880952	0.5	-0.27551	-0.2	-0.333333	-0.325444	0.403509	0.333333	0.705882	-0.5	0.2	0.155556	-0.454545	-0.166667	0.294118	0.36	-0.4	-0.333333	0.6	-0.714286	-0.2	0	0	0.846154	-0.555556	0.0731707	0.971429	0.44	0.2	0	-0.0588235	0.653846
										0.8	0.210526	0.5	0.166667	0.894737	0.5	0.333333	-0.611111	-0.880952	0.5	-0.237624	-0.2	-0.333333	-0.325444	0.403509	0.333333	0.705882	-0.5	0.2	0.155556	-0.454545	-0.166667	0.294118	0.36	-0.4	-0.333333	0.6	-0.714286	-0.2	0	0	0.846154	-0.555556	0.0731707	0.971429	0.44	0.2	0	-0.0588235	0.653846
										0.8	0.210526	0.5	0.166667	0.894737	0.5	0.333333	-0.611111	-0.880952	0.5	-0.215311	-0.2	-0.333333	-0.325444	0.403509	0.333333	0.705882	-0.5	0.2	0.155556	-0.454545	-0.166667	0.294118	0.36	-0.4	-0.333333	0.6	-0.714286	-0.2	0	0	0.846154	-0.555556	0.0731707	0.971429	0.44	0.2	0	-0.0588235	0.653846
										0.8	0.210526	0.5	0.166667	0.894737	0.5	0.333333	-0.611111	-0.880952	0.5	-0.215311	-0.2	-0.333333	-0.325444	0.403509	0.333333	0.705882	-0.5	0.1875	0.155556	-0.454545	-0.166667	0.294118	0.36	-0.4	-0.333333	0.6	-0.714286	-0.2	0	0	0.846154	-0.555556	0.0731707	0.971429	0.44	0.2	0	-0.0588235	0.653846
										0.8	0.210526	0.5	0.166667	0.894737	0.5	0.333333	-0.611111	-0.880952	0.5	-0.216981	-0.2	-0.333333	-0.325444	0.403509	0.333333	0.705882	-0.5	0.1875	0.155556	-0.454545	-0.166667	0.294118	0.36	-0.4	-0.333333	0.6	-0.714286	-0.2	0	0	0.846154	-0.555556	0.0731707	0.971429	0.44	0.2	0	-0.0588235	0.653846
										0.8	0.210526	0.5	0.166667	0.894737	0.5	0.333333	-0.611111	-0.880952	0.5	-0.216981	-0.2	-0.333333	-0.325444	0.403509	0.333333	0.705882	-0.5	0.1875	0.155556	-0.454545	-0.166667	0.294118	0.36	-0.4	-0.333333	0.6	-0.714286	-0.2	0	0	0.846154	-0.555556	0.0731707	0.971429	0.44	0.2	0	-0.0588235	0.653846
										0.8	0.210526	0.5	0.166667	0.894737	0.5	0.333333	-0.611111	-0.880952	0.5	-0.224299	-0.2	-0.333333	-0.325444	0.403509	0.333333	0.705882	-0.5	0.1875	0.155556	-0.454545	-0.166667	0.294118	0.36	-0.4	-0.333333	0.6	-0.714286	-0.2	0	0	0.863636	-0.555556	0.0731707	0.971429	0.44	0.2	0	-0.0588235	0.653846
										0.8	0.210526	0.5	0.166667	0.894737	0.5	0.333333	-0.611111	-0.880952	0.5	-0.224299	-0.2	-0.333333	-0.325444	0.403509	0.333333	0.705882	-0.5	0.1875	0.155556	-0.454545	-0.166667	0.294118	0.36	-0.4	-0.333333	0.6	-0.714286	-0.2	0	0	0.877551	-0.555556	0.0731707	0.971429	0.44	0.2	0	-0.0588235	0.653846
										0.8	0.210526	0.5	0.166667	0.894737	0.5	0.333333	-0.611111	-0.880952	0.5	-0.231482	-0.2	-0.333333	-0.325444	0.403509	0.333333	0.705882	-0.5	0.1875	0.155556	-0.454545	-0.166667	0.294118	0.36	-0.4	-0.333333	0.6	-0.714286	-0.2	0	0	0.884615	-0.555556	0.0731707	0.971429	0.44	0.2	0	-0.0588235	0.653846
										0.8	0.210526	0.5	0.166667	0.894737	0.5	0.333333	-0.611111	-0.880952	0.5	-0.242009	-0.2	-0.333333	-0.325444	0.403509	0.333333	0.705882	-0.5	0.1875	0.155556	-0.454545	-0.166667	0.294118	0.36	-0.4	-0.333333	0.6	-0.714286	-0.2	0	0	0.890909	-0.555556	0.0731707	0.971429	0.44	0.2	0	-0.0588235	0.653846
										0.8	0.210526	0.5	0.166667	0.894737	0.5	0.333333	-0.611111	-0.880952	0.5	-0.245454	-0.2	-0.333333	-0.325444	0.403509	0.333333	0.705882	-0.5	0.1875	0.155556	-0.454545	-0.166667	0.294118	0.36	-0.4	-0.333333	0.6	-0.714286	-0.2	0	0	0.896552	-0.555556	0.0731707	0.971429	0.44	0.2	0	-0.0588235	0.653846
										0.8	0.210526	0.5	0.166667	0.894737	0.5	0.333333	-0.611111	-0.882353	0.5	-0.248869	-0.2	-0.333333	-0.325444	0.403509	0.333333	0.705882	-0.5	0.1875	0.155556	-0.454545	-0.166667	0.294118	0.36	-0.4	-0.333333	0.6	-0.714286	-0.2	0	0	0.896552	-0.555556	0.0731707	0.971429	0.44	0.2	0	-0.0588235	0.653846
										0.8	0.210526	0.5	0.166667	0.894737	0.5	0.333333	-0.611111	-0.882353	0.5	-0.248869	-0.2	-0.333333	-0.325444	0.403509	0.333333	0.705882	-0.5	0.1875	0.155556	-0.454545	-0.166667	0.294118	0.36	-0.4	-0.333333	0.411765	-0.714286	-0.2	0	0	0.904762	-0.555556	0.0731707	0.971429	0.44	0.2	0	-0.0588235	0.653846
										0.8	0.210526	0.5	0.166667	0.894737	0.5	0.333333	-0.611111	-0.882353	0.5	-0.248869	-0.2	-0.333333	-0.325444	0.403509	0.333333	0.705882	-0.5	0.1875	0.155556	-0.454545	-0.166667	0.294118	0.36	-0.4	-0.333333	0.142857	-0.714286	-0.2	0	0	0.904762	-0.555556	0.0731707	0.971429	0.44	0.2	0	-0.0588235	0.653846
										0.8	0.210526	0.5	0.166667	0.894737	0.5	0.333333	-0.611111	-0.882353	0.5	-0.248869	-0.2	-0.333333	-0.325444	0.403509	0.333333	0.705882	-0.5	0.1875	0.155556	-0.454545	-0.166667	0.294118	0.36	-0.4	-0.333333	0.142857	-0.714286	-0.2	0	0	0.904762	-0.555556	0.0731707	0.971429	0.44	0.2	0	-0.0588235	0.653846
										0.8	0.210526	0.5	0.166667	0.894737	0.5	0.333333	-0.611111	-0.882353	0.5	-0.248869	-0.2	-0.333333	-0.325444	0.403509	0.333333	0.705882	-0.5	0.1875	0.155556	-0.454545	-0.166667	0.294118	0.36	-0.4	-0.333333	0.142857	-0.714286	-0.2	0	0	0.904762	-0.555556	0.0731707	0.971429	0.44	0.2	0	-0.0588235	0.653846
										0.8	0.210526	0.5	0.166667	0.894737	0.5	0.333333	-0.611111	-0.882353	0.5	-0.248869	-0.2	-0.333333	-0.325444	0.403509	0.333333	0.705882	-0.5	0.1875	0.155556	-0.454545	-0.166667	0.294118	0.36	-0.4	-0.333333	0.142857	-0.714286	-0.2	0	0	0.904762	-0.555556	0.0731707	0.971429	0.44	0.2	0	-0.0588235	0.653846
										0.8	0.210526	0.5	0.166667	0.894737	0.5	0.333333	-0.611111	-0.882353	0.5	-0.248869	-0.2	-0.333333	-0.325444	0.403509	0.333333	0.705882	-0.5	0.1875	0.155556	-0.454545	-0.166667	0.294118	0.36	-0.4	-0.333333	0.142857	-0.714286	-0.2	0	0	0.904762	-0.555556	0.0731707	0.971429	0.44	0.2	0	-0.0588235	0.653846
										0.8	0.210526	0.5	0.166667	0.894737	0.5	0.333333	-0.611111	-0.882353	0.5	-0.248869	-0.2	-0.333333	-0.325444	0.403509	0.333333	0.705882	-0.5	0.1875	0.155556	-0.454545	-0.166667	0.294118	0.36	-0.4	-0.333333	0.142857	-0.714286	-0.2	0	0	0.904762	-0.555556	0.0731707	0.971429	0.44	0.2	0	-0.0588235	0.653846
										0.8	0.210526	0.5	0.166667	0.894737	0.5	0.333333	-0.611111	-0.882353	0.5	-0.258929	-0.2	-0.333333	-0.309941	0.403509	0.333333	0.705882	-0.5	0.1875	0.155556	-0.454545	-0.166667	0.294118	0.36	-0.4	-0.333333	0.142857	-0.714286	-0.2	0	0	0.904762	-0.555556	0.0731707	0.971429	0.44	0.2	0	-0.0588235	0.653846
										0.8	0.210526	0.5	0.166667	0.894737	0.5	0.333333	-0.611111	-0.882353	0.5	-0.258929	-0.2	-0.333333	-0.272727	0.403509	0.333333	0.705882	-0.5	0.1875	0.173913	-0.454545	-0.166667	0.333333	0.36	-0.4	-0.333333	0.142857	-0.714286	-0.2	0	0	0.904762	-0.555556	0.0731707	0.971429	0.44	0.2	-0.5	-0.0588235	0.653846
										0.8	0.210526	0.5	0.166667	0.894737	0.5	0.333333	-0.611111	-0.882353	0.5	-0.258929	-0.2	-0.333333	-0.230769	0.403509	0.333333	0.705882	-0.5	0.1875	0.173913	-0.454545	-0.166667	0.333333	0.36	-0.4	-0.333333	0.142857	-0.714286	-0.2	0	0	0.904762	-0.555556	0.0731707	0.971429	0.44	0.2	-0.714286	-0.0588235	0.653846
										0.8	0.210526	0.5	0.166667	0.894737	0.5	0.333333	-0.611111	-0.882353	0.5	-0.258929	-0.2	-0.333333	-0.224044	0.403509	0.333333	0.705882	-0.5	0.1875	0.173913	-0.454545	-0.166667	0.333333	0.36	-0.4	-0.333333	0.142857	-0.714286	-0.2	0	0	0.904762	-0.555556	0.0731707	0.971429	0.44	0.2	-0.714286	-0.0588235	0.653846
										0.8	0.210526	0.5	0.166667	0.894737	0.5	0.333333	-0.611111	-0.882353	0.5	-0.258929	-0.2	-0.333333	-0.224044	0.403509	0.333333	0.705882	-0.5	0.1875	0.173913	-0.454545	-0.166667	0.333333	0.36	-0.4	-0.333333	0.142857	-0.714286	-0.2	0	0	0.904762	-0.555556	0.0731707	0.971429	0.44	0.2	-0.714286	-0.0588235	0.653846
										0.8	0.210526	0.5	0.166667	0.894737	0.5	0.333333	-0.611111	-0.882353	0.5	-0.268722	-0.2	-0.333333	-0.217391	0.403509	0.333333	0.705882	-0.5	0.1875	0.173913	-0.454545	-0.166667	0.333333	0.36	-0.4	-0.142857	0.142857	-0.714286	-0.2	0	0	0.904762	-0.555556	0.0731707	0.971429	0.384615	0.142857	-0.714286	-0.0588235	0.653846
										0.8	0.210526	0.5	0.166667	0.894737	0.5	0.333333	-0.611111	-0.882353	0.5	-0.278261	-0.2	-0.333333	-0.217391	0.403509	0.333333	0.705882	-0.5	0.1875	0.173913	-0.454545	-0.166667	0.333333	0.36	-0.4	-0.142857	0.142857	-0.714286	-0.2	0	0	0.904762	-0.555556	0.0731707	0.971429	0.384615	0.142857	-0.714286	-0.0588235	0.653846
										0.8	0.210526	0.5	0.166667	0.894737	0.5	0.333333	-0.611111	-0.883721	0.5	-0.278261	-0.2	-0.333333	-0.217391	0.403509	0.333333	0.705882	-0.5	0.1875	0.173913	-0.454545	-0.166667	0.333333	0.36	-0.4	-0.142857	0.142857	-0.714286	-0.2	0	0	0.904762	-0.555556	0.0731707	0.971429	0.384615	0.142857	-0.714286	-0.0588235	0.653846
										0.8	0.210526	0.5	0.166667	0.894737	0.5	0.333333	-0.611111	-0.883721	0.5	-0.284483	-0.2	-0.333333	-0.217391	0.403509	0.333333	0.705882	-0.5	0.195876	0.173913	-0.454545	-0.166667	0.333333	0.36	-0.4	-0.142857	0.142857	-0.714286	-0.2	0	0	0.904762	-0.555556	0.0731707	0.971429	0.384615	0.142857	-0.714286	-0.0588235	0.653846
										0.8	0.210526	0.5	0.166667	0.894737	0.5	0.333333	-0.611111	-0.883721	0.5	-0.284483	-0.2	-0.333333	-0.210811	0.403509	0.333333	0.705882	-0.5	0.257143	0.173913	-0.454545	-0.166667	0.333333	0.36	-0.4	-0.142857	0.142857	-0.714286	-0.2	0	0	0.904762	-0.555556	0.0731707	0.971429	0.384615	0.142857	-0.714286	-0.0588235	0.653846
										0.8	0.210526	0.5	0.166667	0.894737	0.5	0.333333	-0.611111	-0.883721	0.5	-0.293617	-0.2	-0.333333	-0.210811	0.403509	0.333333	0.705882	-0.5	0.290909	0.173913	-0.454545	-0.166667	0.333333	0.36	-0.4	-0.142857	0.142857	-0.714286	-0.2	0	0	0.904762	-0.555556	0.0731707	0.971429	0.384615	0.142857	-0.714286	-0.0588235	0.653846
										0.8	0.210526	0.5	0.166667	0.894737	0.5	0.333333	-0.611111	-0.883721	0.5	-0.305439	-0.2	-0.333333	-0.210811	0.403509	0.333333	0.705882	-0.5	0.297297	0.173913	-0.454545	-0.166667	0.333333	0.36	-0.4	-0.142857	0.142857	-0.714286	-0.2	0	0	0.904762	-0.555556	0.0731707	0.971429	0.384615	0.142857	-0.714286	-0.0588235	0.653846
										0.8	0.210526	0.5	0.166667	0.894737	0.5	0.333333	-0.611111	-0.883721	0.5	-0.316872	-0.2	-0.333333	-0.210811	0.403509	0.333333	0.705882	-0.5	0.297297	0.173913	-0.454545	-0.166667	0.333333	0.36	-0.4	-0.142857	0.142857	-0.714286	-0.2	0	0	0.904762	-0.555556	0.0731707	0.971429	0.384615	0.142857	-0.714286	-0.0588235	0.653846
										0.8	0.210526	0.5	0.166667	0.894737	0.5	0.333333	-0.611111	-0.883721	0.5	-0.325203	-0.2	-0.333333	-0.210811	0.403509	0.333333	0.705882	-0.5	0.297297	0.173913	-0.454545	-0.166667	0.333333	0.36	-0.4	-0.142857	0.142857	-0.714286	-0.2	0	0	0.904762	-0.555556	0.0731707	0.971429	0.384615	0.142857	-0.714286	-0.0588235	0.653846
										0.8	0.210526	0.5	0.166667	0.894737	0.5	0.333333	-0.611111	-0.883721	0.5	-0.325203	-0.2	-0.333333	-0.210811	0.403509	0.333333	0.705882	-0.5	0.297297	0.173913	-0.454545	-0.166667	0.333333	0.36	-0.4	-0.142857	0.142857	-0.714286	-0.2	0	0	0.904762	-0.555556	0.0731707	0.971429	0.384615	0.142857	-0.714286	-0.0588235	0.653846
										0.8	0.210526	0.5	0.166667	0.894737	0.5	0.333333	-0.611111	-0.883721	0.5	-0.333333	-0.2	-0.333333	-0.210811	0.403509	0.333333	0.705882	-0.5	0.285714	0.173913	-0.454545	-0.166667	0.333333	0.36	-0.4	-0.142857	0.142857	-0.714286	-0.2	0	0	0.904762	-0.555556	0.0731707	0.971429	0.384615	0.142857	-0.714286	-0.0588235	0.653846
										0.8	0.210526	0.5	0.166667	0.894737	0.5	0.333333	-0.611111	-0.883721	0.5	-0.34127	-0.2	-0.333333	-0.210811	0.403509	0.333333	0.714286	-0.5	0.263158	0.173913	-0.454545	-0.166667	0.333333	0.36	-0.4	-0.142857	0.142857	-0.714286	-0.2	0	0	0.904762	-0.555556	0.0731707	0.971429	0.384615	0.142857	-0.714286	-0.0588235	0.653846
										0.8	0.210526	0.5	0.166667	0.894737	0.5	0.333333	-0.611111	-0.883721	0.777778	-0.346457	-0.2	-0.333333	-0.210811	0.403509	0.333333	0.714286	-0.5	0.263158	0.173913	-0.454545	-0.166667	0.333333	0.36	-0.4	-0.142857	0.142857	-0.714286	-0.2	0	0	0.904762	-0.555556	0.0731707	0.971429	0.384615	0.142857	-0.714286	-0.0588235	0.653846
										0.8	0.210526	0.5	0.166667	0.894737	0.5	0.333333	-0.611111	-0.883721	0.833333	-0.359073	-0.2	-0.333333	-0.210811	0.403509	0.333333	0.714286	-0.5	0.252174	0.173913	-0.454545	-0.166667	0.333333	0.36	-0.4	-0.142857	0.142857	-0.714286	-0.2	0	0	0.904762	-0.555556	0.0731707	0.971429	0.384615	0.142857	-0.714286	-0.0588235	0.653846
										0.8	0.210526	0.5	0.166667	0.894737	0.5	0.333333	-0.611111	-0.883721	0.833333	-0.361538	-0.2	-0.333333	-0.210811	0.403509	0.333333	0.714286	-0.5	0.252174	0.173913	-0.454545	-0.166667	0.333333	0.36	-0.4	-0.142857	0.142857	-0.714286	-0.2	0	0	0.904762	-0.555556	0.0731707	0.971429	0.384615	0.142857	-0.714286	-0.0588235	0.653846
										0.8	0.210526	0.5	0.166667	0.894737	0.5	0.333333	-0.611111	-0.883721	0.833333	-0.363985	-0.2	-0.333333	-0.210811	0.403509	0.333333	0.714286	-0.5	0.252174	0.173913	-0.454545	-0.166667	0.333333	0.36	-0.4	-0.142857	0.142857	-0.714286	-0.2	0	0	0.904762	-0.555556	0.0731707	0.971429	0.384615	0.142857	-0.714286	-0.0588235	0.653846
										0.8	0.210526	0.5	0.166667	0.894737	0.5	0.333333	-0.611111	-0.883721	0.833333	-0.368821	-0.2	-0.333333	-0.210811	0.403509	0.333333	0.714286	-0.5	0.252174	0.173913	-0.454545	-0.166667	0.333333	0.36	-0.4	-0.142857	0.142857	-0.714286	-0.2	0	0	0.904762	-0.555556	0.0731707	0.971429	0.384615	0.142857	-0.714286	-0.0588235	0.653846
										0.8	0.210526	0.5	0.166667	0.894737	0.5	0.333333	-0.611111	-0.885058	0.833333	-0.380597	-0.2	-0.333333	-0.210811	0.403509	0.333333	0.714286	-0.5	0.252174	0.173913	-0.454545	-0.166667	0.333333	0.36	-0.4	-0.142857	0.142857	-0.714286	-0.2	0	0	0.904762	-0.555556	0.0731707	0.971429	0.384615	0.142857	-0.714286	-0.0588235	0.653846
										0.8	0.210526	0.5	0.166667	0.894737	0.5	0.333333	-0.611111	-0.885058	0.833333	-0.380597	-0.2	-0.333333	-0.210811	0.403509	0.333333	0.722222	-0.5	0.252174	0.173913	-0.454545	-0.166667	0.333333	0.36	-0.4	-0.142857	0.142857	-0.714286	-0.2	0	0	0.904762	-0.555556	0.0731707	0.971429	0.384615	0.142857	-0.714286	-0.0588235	0.653846
										0.8	0.210526	0.5	0.166667	0.894737	0.5	0.333333	-0.611111	-0.885058	0.833333	-0.3829	-0.2	-0.333333	-0.210811	0.403509	0.333333	0.722222	-0.5	0.252174	0.173913	-0.454545	-0.166667	0.333333	0.36	-0.4	-0.142857	0.142857	-0.714286	-0.2	0	0	0.904762	-0.555556	0.0731707	0.971429	0.384615	0.142857	-0.714286	-0.0588235	0.653846
										0.8	0.210526	0.5	0.166667	0.894737	0.5	0.333333	-0.611111	-0.885058	0.833333	-0.3829	-0.2	-0.333333	-0.172775	0.403509	0.333333	0.722222	-0.5	0.252174	0.173913	-0.454545	-0.166667	0.333333	0.36	-0.4	-0.142857	0.142857	-0.714286	-0.2	0	0	0.904762	-0.555556	0.0731707	0.971429	0.384615	0.142857	-0.714286	-0.0769231	0.653846
										0.8	0.210526	0.5	0.166667	0.894737	0.5	0.333333	-0.611111	-0.885058	0.833333	-0.389706	-0.2	-0.333333	-0.137056	0.403509	0.333333	0.722222	-0.5	0.252174	0.173913	-0.454545	-0.166667	0.333333	0.36	-0.4	-0.142857	0.142857	-0.714286	-0.2	0	0	0.904762	-0.555556	0.0731707	0.971429	0.384615	0.142857	-0.714286	-0.0769231	0.653846
										0.8	0.210526	0.5	0.166667	0.894737	0.5	0.333333	-0.611111	-0.885058	0.833333	-0.391941	-0.2	-0.333333	-0.131313	0.403509	0.333333	0.722222	-0.5	0.252174	0.173913	-0.454545	-0.166667	0.333333	0.36	-0.4	-0.142857	0.142857	-0.714286	-0.2	0	0	0.904762	-0.555556	0.0731707	0.971429	0.384615	0.142857	-0.714286	-0.0769231	0.653846
										0.8	0.210526	0.5	0.166667	0.894737	0.5	0.333333	-0.611111	-0.885058	0.833333	-0.394161	-0.2	-0.333333	-0.131313	0.403509	0.333333	0.722222	-0.5	0.252174	0.173913	-0.454545	-0.166667	0.333333	0.36	-0.4	-0.142857	0.142857	-0.714286	-0.2	0	0	0.904762	-0.555556	0.0731707	0.971429	0.384615	0.142857	-0.714286	-0.0769231	0.653846
										0.8	0.210526	-0.142857	0.166667	0.894737	0.6	0.333333	-0.611111	-0.885058	0.833333	-0.394161	-0.2	-0.333333	-0.125628	0.403509	0.333333	0.722222	-0.5	0.210084	0.173913	-0.454545	-0.166667	0.333333	0.36	-0.4	-0.142857	0.142857	-0.714286	-0.2	0	0	0.904762	-0.555556	0.0731707	0.971429	0.384615	0.142857	-0.714286	-0.0769231	0.653846
										0.8	0.210526	-0.25	0.166667	0.894737	0.6	0.333333	-0.611111	-0.885058	0.833333	-0.394161	-0.2	-0.333333	-0.125628	0.403509	0.333333	0.722222	-0.5	0.210084	0.173913	-0.454545	-0.166667	0.333333	0.36	-0.4	-0.142857	0.142857	-0.714286	-0.2	0	0	0.904762	-0.555556	0.0731707	0.971429	0.384615	0.142857	-0.714286	-0.0769231	0.653846
										0.8	0.210526	-0.25	0.166667	0.894737	0.6	0.333333	-0.611111	-0.885058	0.833333	-0.394161	-0.2	-0.333333	-0.147059	0.403509	0.333333	0.722222	-0.5	0.2	0.173913	-0.454545	-0.166667	0.333333	0.36	-0.4	-0.142857	0.142857	-0.714286	-0.2	0	0	0.904762	-0.555556	0.0731707	0.971429	0.384615	0.142857	-0.714286	-0.0181818	0.653846
										0.8	0.210526	-0.333333	0.166667	0.894737	0.6	0.333333	-0.611111	-0.885058	0.833333	-0.394161	-0.2	-0.333333	-0.183099	0.403509	0.333333	0.722222	-0.5	0.2	0.173913	-0.454545	-0.166667	0.333333	0.36	-0.4	-0.142857	0.142857	-0.714286	-0.2	0	0	0.904762	-0.555556	0.0731707	0.971429	0.384615	0.142857	-0.714286	-0.0181818	0.653846
										0.8	0.210526	-0.333333	0.166667	0.894737	0.6	0.333333	-0.611111	-0.885058	0.833333	-0.394161	-0.2	-0.333333	-0.198157	0.403509	0.333333	0.722222	-0.5	0.2	0.173913	-0.454545	-0.166667	0.333333	0.36	-0.4	-0.142857	0.142857	-0.714286	-0.2	0	0	0.904762	-0.555556	0.0731707	0.971429	0.384615	0.142857	-0.714286	-0.0181818	0.653846
										0.8	0.210526	-0.5	0.166667	0.894737	0.6	0.333333	-0.611111	-0.885058	0.833333	-0.394161	-0.2	-0.333333	-0.201835	0.403509	0.333333	0.722222	-0.5	0.2	0.173913	-0.454545	-0.166667	0.333333	0.36	-0.4	-0.142857	0.142857	-0.714286	-0.2	0	0	0.904762	-0.555556	0.0731707	0.971429	0.384615	0.142857	-0.714286	-0.0181818	0.653846
										0.8	0.210526	-0.538462	0.166667	0.894737	0.6	0.333333	-0.611111	-0.885058	0.833333	-0.394161	-0.2	-0.333333	-0.201835	0.403509	0.333333	0.722222	-0.5	0.2	0.173913	-0.454545	-0.166667	0.333333	0.36	-0.4	-0.142857	0.142857	-0.714286	-0.2	0	0	0.904762	-0.555556	0.0731707	0.971429	0.384615	0.142857	-0.714286	-0.0181818	0.653846
										0.8	0.210526	-0.6	0.166667	0.894737	0.6	0.333333	-0.611111	-0.885058	0.833333	-0.394161	-0.2	-0.333333	-0.201835	0.403509	0.333333	0.722222	-0.5	0.2	0.173913	-0.454545	-0.166667	0.333333	0.36	-0.4	-0.142857	0.142857	-0.714286	-0.2	0	0	0.904762	-0.555556	0.0731707	0.971429	0.384615	0.142857	-0.714286	-0.0181818	0.653846
										0.8	0.210526	-0.647059	0.166667	0.894737	0.6	0.333333	-0.611111	-0.885058	0.833333	-0.394161	-0.2	-0.333333	-0.201835	0.403509	0.333333	0.722222	-0.5	0.2	0.173913	-0.454545	-0.166667	0.333333	0.36	-0.4	-0.142857	0.142857	-0.714286	-0.2	0	0	0.904762	-0.555556	0.0731707	0.971429	0.384615	0.142857	-0.714286	-0.0181818	0.653846
										0.8	0.210526	-0.684211	0.166667	0.894737	0.6	0.333333	-0.611111	-0.885058	0.833333	-0.394161	-0.2	-0.333333	-0.201835	0.403509	0.333333	0.722222	-0.5	0.2	0.173913	-0.454545	-0.166667	0.333333	0.36	-0.4	-0.142857	0.142857	-0.714286	-0.2	0	0	0.904762	-0.555556	0.0731707	0.971429	0.384615	0.142857	-0.714286	-0.0181818	0.653846
										0.8	0.210526	-0.73913	0.166667	0.894737	0.6	0.333333	-0.611111	-0.885058	0.833333	-0.394161	-0.2	-0.333333	-0.201835	0.403509	0.333333	0.722222	-0.5	0.170732	0.191489	-0.454545	-0.166667	0.333333	0.36	-0.4	-0.142857	0.142857	-0.714286	-0.2	0	0	0.904762	-0.555556	0.0731707	0.971429	0.384615	0.142857	-0.714286	-0.0181818	0.653846
										0.8	0.210526	-0.769231	0.166667	0.894737	0.6	0.333333	-0.611111	-0.885058	0.833333	-0.394161	-0.2	-0.333333	-0.201835	0.403509	0.333333	0.722222	-0.5	0.170732	0.191489	-0.454545	-0.166667	0.333333	0.36	-0.4	-0.142857	0.142857	-0.714286	-0.2	0	0	0.904762	-0.555556	0.0731707	0.971429	0.384615	0.142857	-0.714286	-0.0181818	0.653846
										0.8	0.210526	-0.806452	0.166667	0.894737	0.6	0.333333	-0.611111	-0.885058	0.833333	-0.394161	-0.2	-0.333333	-0.201835	0.403509	0.333333	0.722222	-0.5	0.170732	0.191489	-0.454545	-0.166667	0.333333	0.36	-0.4	-0.142857	0.142857	-0.714286	-0.2	0	0	0.904762	-0.555556	0.0731707	0.971429	0.384615	0.142857	-0.714286	-0.0181818	0.653846
										0.8	0.210526	-0.8125	0.166667	0.894737	0.6	0.333333	-0.611111	-0.885058	0.833333	-0.396364	-0.2	-0.333333	-0.201835	0.403509	0.333333	0.722222	-0.5	0.170732	0.191489	-0.454545	-0.166667	0.333333	0.36	-0.4	-0.142857	0.142857	-0.714286	-0.2	0	0	0.904762	-0.555556	0.0731707	0.971429	0.384615	0.142857	-0.714286	-0.0181818	0.653846
										0.8	0.210526	-0.8125	0.166667	0.894737	0.6	0.333333	-0.611111	-0.885058	0.833333	-0.396364	-0.2	-0.333333	-0.201835	0.403509	0.333333	0.722222	-0.5	0.170732	0.191489	-0.454545	-0.166667	0.333333	0.36	-0.4	-0.142857	0.142857	-0.714286	-0.2	0	0	0.904762	-0.555556	0.0731707	0.971429	0.384615	0.142857	-0.714286	-0.0181818	0.653846
										0.8	0.210526	-0.8125	0.166667	0.894737	0.6	0.333333	-0.611111	-0.885058	0.833333	-0.396364	-0.2	-0.333333	-0.201835	0.403509	0.333333	0.722222	-0.5	0.170732	0.191489	-0.454545	-0.166667	0.333333	0.36	-0.4	-0.142857	0.142857	-0.714286	-0.2	0	0	0.904762	-0.555556	0.0731707	0.971429	0.384615	0.142857	-0.714286	-0.0181818	0.653846
										0.8	0.210526	-0.8125	0.166667	0.894737	0.6	0.333333	-0.611111	-0.885058	0.833333	-0.396364	-0.2	-0.333333	-0.201835	0.403509	0.333333	0.722222	-0.5	0.19685	0.191489	-0.454545	-0.166667	0.333333	0.36	-0.4	-0.142857	0.142857	-0.714286	-0.2	0	0	0.904762	-0.555556	0.0731707	0.971429	0.384615	0.142857	-0.714286	-0.0181818	0.653846
										0.8	0.210526	-0.8125	0.166667	0.894737	0.6	0.333333	-0.611111	-0.885058	0.833333	-0.396364	-0.2	-0.333333	-0.201835	0.403509	0.333333	0.722222	-0.5	0.233083	0.191489	-0.454545	-0.166667	0.333333	0.36	-0.4	-0.142857	0.142857	-0.714286	-0.2	0	0	0.904762	-0.555556	0.0731707	0.971429	0.384615	0.142857	-0.714286	-0.0181818	0.653846
										0.8	0.210526	-0.8125	0.166667	0.894737	0.6	0.333333	-0.526316	-0.885058	0.833333	-0.396364	-0.2	-0.333333	-0.201835	0.403509	0.333333	0.722222	-0.5	0.238806	0.191489	-0.454545	-0.166667	0.333333	0.36	-0.4	-0.142857	0.142857	-0.714286	-0.2	0	0	0.904762	-0.555556	0.0731707	0.971429	0.384615	0.142857	-0.714286	-0.0181818	0.653846
										0.8	0.220779	-0.8125	0.166667	0.894737	0.6	0.333333	-0.348837	-0.885058	0.833333	-0.396364	-0.2	-0.333333	-0.201835	0.403509	0.333333	0.722222	-0.5	0.238806	0.191489	-0.454545	-0.166667	0.333333	0.36	-0.4	-0.142857	0.142857	-0.714286	-0.2	0	0	0.904762	-0.555556	0.0731707	0.971429	0.384615	0.142857	-0.75	-0.0181818	0.653846
										0.8	0.220779	-0.8125	0.166667	0.894737	0.6	0.333333	-0.183673	-0.885058	0.833333	-0.396364	-0.2	-0.333333	-0.201835	0.403509	0.333333	0.722222	-0.5	0.238806	0.191489	-0.454545	-0.166667	0.333333	0.36	-0.4	-0.142857	0.142857	-0.714286	-0.2	0	0	0.904762	-0.555556	0.0731707	0.971429	0.384615	0.142857	-0.75	-0.0181818	0.653846
										0.8	0.220779	-0.8125	0.166667	0.894737	0.6	0.333333	-0.16	-0.885058	0.833333	-0.396364	-0.2	-0.333333	-0.201835	0.403509	0.333333	0.722222	-0.5	0.244444	0.191489	-0.454545	-0.166667	0.333333	0.36	-0.4	-0.142857	0.142857	-0.714286	-0.2	0	0	0.904762	-0.555556	0.0731707	0.971429	0.384615	0.142857	-0.75	-0.0181818	0.653846
										0.8	0.220779	-0.8125	0.166667	0.894737	0.6	0.333333	-0.16	-0.885058	0.833333	-0.396364	-0.2	-0.333333	-0.201835	0.403509	0.333333	0.722222	-0.5	0.244444	0.191489	-0.454545	-0.166667	0.333333	0.36	-0.4	-0.142857	0.142857	-0.714286	-0.2	0	0	0.904762	-0.555556	0.0731707	0.974026	0.384615	0.142857	-0.75	-0.0181818	0.653846
										0.8	0.220779	-0.8125	0.166667	0.894737	0.6	0.333333	-0.16	-0.885058	0.833333	-0.396364	-0.2	-0.333333	-0.201835	0.37931	0.333333	0.722222	-0.5	0.244444	0.191489	-0.454545	-0.166667	0.333333	0.36	-0.4	-0.142857	0.142857	-0.714286	-0.2	0	0	0.904762	-0.555556	0.0731707	0.97619	0.384615	0.142857	-0.75	-0.0181818	0.653846
										0.8	0.220779	-0.8125	0.166667	0.894737	0.6	0.333333	-0.16	-0.885058	0.833333	-0.396364	-0.2	-0.333333	-0.20548	0.37931	0.333333	0.722222	-0.5	0.244444	0.191489	-0.454545	-0.166667	0.333333	0.36	-0.4	-0.142857	0.142857	-0.714286	-0.2	0	0	0.904762	-0.555556	0.0731707	0.97619	0.384615	0.142857	-0.75	-0.0181818	0.653846
										0.8	0.220779	-0.8125	0.166667	0.894737	0.6	0.333333	-0.16	-0.886364	0.833333	-0.396364	-0.2	-0.333333	-0.230089	0.37931	0.333333	0.722222	-0.5	0.244444	0.191489	-0.454545	-0.166667	0.333333	0.36	-0.4	-0.142857	0.142857	-0.714286	-0.2	0	0	0.904762	-0.555556	0.0731707	0.97619	0.384615	0.142857	-0.75	-0.0181818	0.653846
										0.8	0.220779	-0.8125	0.166667	0.894737	0.6	0.333333	-0.16	-0.886364	0.833333	-0.396364	-0.2	-0.333333	-0.25	0.37931	0.333333	0.722222	-0.5	0.244444	0.191489	-0.454545	-0.166667	0.333333	0.36	-0.4	-0.142857	0.142857	-0.714286	-0.2	0	0	0.904762	-0.555556	0.0731707	0.97619	0.384615	0.142857	-0.75	-0.0181818	0.653846
										0.8	0.220779	-0.8125	0.166667	0.894737	0.6	0.333333	-0.16	-0.886364	0.833333	-0.396364	-0.2	-0.333333	-0.253219	0.37931	0.333333	0.722222	-0.5	0.208633	0.191489	-0.454545	-0.166667	0.333333	0.36	-0.4	-0.142857	0.142857	-0.714286	-0.2	0	0	0.904762	-0.555556	0.0731707	0.97619	0.384615	0.142857	-0.75	-0.0181818	0.653846
										0.8	0.220779	-0.8125	0.166667	0.894737	0.6	0.333333	-0.16	-0.886364	0.833333	-0.396364	-0.2	-0.333333	-0.253219	0.37931	0.333333	0.722222	-0.5	0.219858	0.191489	-0.454545	-0.166667	0.333333	0.36	-0.4	-0.142857	0.142857	-0.714286	-0.2	0	0	0.904762	-0.555556	0.0731707	0.97619	0.384615	0.142857	-0.75	-0.0181818	0.653846
										0.8	0.220779	-0.8125	0.166667	0.894737	0.6	0.333333	-0.16	-0.886364	0.833333	-0.396364	-0.2	-0.333333	-0.253219	0.37931	0.333333	0.722222	-0.5	0.225352	0.191489	-0.454545	-0.166667	0.333333	0.36	-0.4	-0.142857	0.142857	-0.714286	-0.2	0	0	0.904762	-0.555556	0.0731707	0.97619	0.384615	0.142857	-0.75	-0.0181818	0.653846
										0.8	0.220779	-0.818182	0.166667	0.894737	0.6	0.333333	-0.16	-0.886364	0.833333	-0.396364	-0.2	-0.333333	-0.253219	0.37931	0.333333	0.722222	-0.5	0.216783	0.191489	-0.454545	-0.166667	0.333333	0.36	-0.4	-0.142857	0.142857	-0.714286	-0.2	0	0	0.904762	-0.555556	0.0731707	0.97619	0.384615	0.142857	-0.75	-0.0181818	0.653846
										0.8	0.220779	-0.842105	0.166667	0.894737	0.6	0.333333	-0.16	-0.886364	0.833333	-0.396364	-0.2	-0.333333	-0.253219	0.37931	0.333333	0.722222	-0.5	0.216783	0.191489	-0.454545	-0.166667	0.333333	0.36	-0.4	-0.142857	0.142857	-0.714286	-0.2	0	0	0.904762	-0.555556	0.0731707	0.97619	0.384615	0.142857	-0.75	-0.0181818	0.653846
										0.8	0.220779	-0.863636	0.166667	0.894737	0.6	0.333333	-0.16	-0.886364	0.833333	-0.396364	-0.2	-0.333333	-0.253219	0.37931	0.333333	0.722222	-0.333333	0.216783	0.191489	-0.454545	-0.166667	0.333333	0.36	-0.4	-0.142857	0.142857	-0.714286	-0.2	0	0	0.904762	-0.555556	0.0731707	0.97619	0.384615	0.142857	-0.75	-0.0181818	0.653846
										0.8	0.220779	-0.863636	0.166667	0.894737	0.6	0.333333	-0.16	-0.886364	0.833333	-0.396364	-0.2	-0.333333	-0.247863	0.37931	0.333333	0.722222	-0.333333	0.216783	0.191489	-0.454545	-0.166667	0.333333	0.36	-0.4	-0.142857	0.142857	-0.714286	-0.2	0	0	0.904762	-0.555556	0.0731707	0.97619	0.384615	0.142857	-0.75	-0.0181818	0.653846
										0.8	0.220779	-0.866667	0.166667	0.894737	0.6	0.333333	-0.16	-0.886364	0.833333	-0.396364	-0.2	-0.333333	-0.247863	0.37931	0.333333	0.722222	-0.333333	0.216783	0.191489	-0.454545	-0.166667	0.333333	0.36	-0.4	-0.142857	0.142857	-0.714286	-0.2	0	0	0.904762	-0.555556	0.0731707	0.97619	0.384615	0.142857	-0.75	-0.0181818	0.653846
										0.8	0.220779	-0.866667	0.166667	0.894737	0.333333	0.333333	-0.16	-0.886364	0.833333	-0.391304	-0.2	-0.333333	-0.247863	0.37931	0.333333	0.722222	-0.333333	0.216783	0.191489	-0.454545	-0.166667	0.333333	0.36	-0.4	-0.142857	0.142857	-0.714286	-0.2	0	0	0.904762	-0.555556	0.0731707	0.97619	0.384615	0.142857	-0.75	-0.0181818	0.653846
										0.8	0.220779	-0.866667	0.166667	0.894737	0.333333	0.333333	-0.16	-0.886364	0.833333	-0.391304	-0.2	-0.333333	-0.247863	0.37931	0.333333	0.722222	-0.333333	0.175676	0.22449	-0.454545	-0.166667	0.333333	0.36	-0.4	-0.142857	0.142857	-0.714286	-0.2	0	0	0.904762	-0.555556	0.0731707	0.97619	0.384615	0.142857	-0.75	-0.0181818	0.653846
										0.8	0.220779	-0.866667	0.166667	0.894737	0.333333	0.333333	-0.16	-0.886364	0.833333	-0.393502	-0.2	-0.333333	-0.247863	0.37931	0.333333	0.722222	-0.333333	0.175676	0.24	-0.454545	-0.166667	0.333333	0.36	-0.4	-0.142857	0.142857	-0.714286	-0.2	0	0	0.904762	-0.555556	0.0731707	0.97619	0.384615	0.142857	-0.75	-0.0181818	0.653846
										0.8	0.220779	-0.866667	0.166667	0.894737	0.333333	0.333333	-0.16	-0.886364	0.833333	-0.393502	-0.2	-0.333333	-0.247863	0.37931	0.333333	0.722222	-0.333333	0.175676	0.24	-0.454545	-0.166667	0.333333	0.36	-0.4	-0.142857	0.142857	-0.714286	-0.2	0	0	0.904762	-0.555556	0.0731707	0.97619	0.384615	0.142857	-0.75	-0.0181818	0.653846
										0.8	0.220779	-0.866667	0.166667	0.894737	0.333333	0.333333	-0.16	-0.886364	0.833333	-0.393502	-0.2	-0.333333	-0.247863	0.37931	0.333333	0.722222	-0.333333	0.167785	0.24	-0.454545	-0.166667	0.333333	0.36	-0.4	-0.142857	0.142857	-0.714286	-0.2	0	0	0.904762	-0.555556	0.0731707	0.97619	0.384615	0.142857	-0.75	-0.0181818	0.653846
										0.8	0.220779	-0.866667	0.166667	0.894737	0.333333	0.333333	-0.16	-0.886364	0.833333	-0.393502	-0.2	-0.333333	-0.247863	0.37931	0.333333	0.722222	-0.333333	0.167785	0.24	-0.454545	-0.166667	0.333333	0.36	-0.4	-0.142857	0.142857	-0.714286	-0.2	0	0	0.904762	-0.555556	0.0731707	0.97619	0.384615	0.142857	-0.75	-0.0181818	0.653846
										0.8	0.220779	-0.866667	0.166667	0.894737	0.333333	0.333333	-0.16	-0.886364	0.833333	-0.393502	-0.2	-0.333333	-0.247863	0.37931	0.333333	0.722222	-0.333333	0.167785	0.24	-0.454545	-0.166667	0.333333	0.36	-0.4	-0.142857	0.142857	-0.714286	-0.2	0	0	0.904762	-0.555556	0.0731707	0.97619	0.384615	0.142857	-0.75	-0.0181818	0.653846
										0.8	0.220779	-0.866667	0.166667	0.894737	0.333333	0.333333	-0.16	-0.886364	0.833333	-0.393502	-0.2	-0.333333	-0.247863	0.37931	0.333333	0.722222	-0.333333	0.167785	0.309091	-0.454545	-0.166667	0.333333	0.36	-0.4	-0.142857	0.142857	-0.714286	-0.2	0	0	0.904762	-0.555556	0.0731707	0.97619	0.384615	0.142857	-0.75	-0.0181818	0.653846
										0.8	0.220779	-0.866667	0.166667	0.894737	0.333333	0.333333	-0.16	-0.886364	0.833333	-0.393502	-0.2	-0.333333	-0.247863	0.37931	0.333333	0.722222	-0.333333	0.167785	0.309091	-0.454545	-0.166667	0.333333	0.36	-0.4	-0.142857	0.142857	-0.714286	-0.2	0	0	0.904762	-0.555556	0.0731707	0.97619	0.384615	0.142857	-0.75	-0.0181818	0.653846
										0.8	0.220779	-0.866667	0.166667	0.894737	0.333333	0.333333	-0.16	-0.886364	0.833333	-0.393502	-0.2	-0.333333	-0.247863	0.4	0.333333	0.722222	-0.333333	0.167785	0.309091	-0.454545	-0.166667	0.333333	0.36	-0.4	-0.142857	0.142857	-0.714286	-0.2	0	0	0.904762	-0.555556	0.0731707	0.97619	0.384615	0.142857	-0.75	-0.0181818	0.653846
										0.8	0.220779	-0.866667	0.166667	0.894737	0.333333	0.333333	-0.16	-0.886364	0.833333	-0.393502	-0.2	-0.333333	-0.247863	0.419355	0.333333	0.722222	-0.333333	0.167785	0.309091	-0.454545	-0.166667	0.333333	0.36	-0.4	-0.142857	0.142857	-0.714286	-0.2	0	0	0.904762	-0.555556	0.136364	0.97619	0.384615	0.142857	-0.75	-0.0181818	0.653846
										0.8	0.220779	-0.866667	0.166667	0.894737	0.333333	0.333333	-0.16	-0.886364	0.833333	-0.393502	-0.2	-0.333333	-0.247863	0.419355	0.333333	0.722222	-0.333333	0.167785	0.309091	-0.454545	-0.166667	0.333333	0.36	-0.4	-0.142857	0.142857	-0.714286	-0.2	0	0	0.904762	-0.555556	0.173913	0.97619	0.384615	0.0909091	-0.75	-0.0181818	0.653846
										0.8	0.220779	-0.866667	0.166667	0.894737	0.333333	0.333333	-0.16	-0.886364	0.833333	-0.393502	-0.2	-0.333333	-0.247863	0.454545	0.333333	0.722222	-0.333333	0.167785	0.309091	-0.454545	-0.166667	0.333333	0.36	-0.4	-0.142857	0.142857	-0.714286	-0.2	0	0	0.904762	-0.555556	0.254902	0.97619	0.384615	0.0909091	-0.75	-0.0181818	0.653846
										0.8	0.220779	-0.866667	0.166667	0.894737	0.333333	0.333333	-0.16	-0.886364	0.833333	-0.393502	-0.2	-0.333333	-0.257384	0.470588	0.333333	0.722222	-0.333333	0.167785	0.309091	-0.454545	-0.166667	0.333333	0.36	-0.4	-0.142857	0.142857	-0.714286	-0.2	0	0	0.904762	-0.555556	0.283019	0.97619	0.384615	0.0909091	-0.75	-0.0181818	0.653846
										0.8	0.220779	-0.866667	0.166667	0.894737	0.333333	0.333333	-0.16	-0.886364	0.833333	-0.393502	-0.2	-0.333333	-0.284553	0.506849	0.333333	0.722222	-0.333333	0.167785	0.309091	-0.454545	-0.166667	0.333333	0.36	-0.4	-0.142857	0.142857	-0.714286	-0.2	0	0	0.904762	-0.555556	0.283019	0.97619	0.384615	0.0909091	-0.75	-0.0181818	0.653846
										0.8	0.220779	-0.866667	0.166667	0.894737	0.333333	0.333333	-0.16	-0.886364	0.833333	-0.393502	-0.2	-0.333333	-0.293173	0.52	0.333333	0.722222	-0.333333	0.167785	0.309091	-0.454545	-0.166667	0.333333	0.36	0.0666667	-0.142857	0.142857	-0.714286	-0.2	0	0	0.904762	-0.555556	0.283019	0.97619	0.384615	0.0909091	-0.75	-0.0181818	0.653846
										0.8	0.220779	-0.866667	0.166667	0.894737	0.333333	0.333333	-0.16	-0.886364	0.833333	-0.393502	-0.2	-0.333333	-0.307087	0.526316	0.333333	0.722222	-0.333333	0.167785	0.309091	-0.454545	-0.166667	0.333333	0.36	0.263158	-0.142857	0.142857	-0.714286	-0.2	0	0	0.904762	-0.555556	0.283019	0.97619	0.384615	0.0909091	-0.75	-0.0181818	0.653846
										0.8	0.220779	-0.866667	0.166667	0.894737	0.333333	0.333333	-0.16	-0.886364	0.833333	-0.393502	-0.2	-0.333333	-0.309804	0.526316	0.333333	0.722222	-0.333333	0.167785	0.309091	-0.454545	-0.166667	0.333333	0.36	0.3	-0.142857	0.142857	-0.714286	-0.2	0	0	0.904762	-0.555556	0.283019	0.97619	0.384615	0.0909091	-0.75	-0.0181818	0.653846
										0.8	0.220779	-0.866667	0.166667	0.894737	0.333333	0.333333	-0.16	-0.886364	0.833333	-0.393502	-0.2	-0.333333	-0.3125	0.526316	0.333333	0.722222	-0.333333	0.167785	0.309091	-0.454545	-0.166667	0.333333	0.428571	0.461539	-0.142857	0.142857	-0.714286	-0.2	0	0	0.904762	-0.555556	0.283019	0.97619	0.384615	0.0909091	-0.75	-0.0181818	0.653846
										0.8	0.220779	-0.866667	0.166667	0.894737	0.333333	0.333333	-0.16	-0.886364	0.833333	-0.393502	-0.2	-0.333333	-0.3125	0.526316	0.333333	0.722222	-0.333333	0.167785	0.309091	-0.454545	-0.166667	0.333333	0.428571	0.5	-0.142857	0.142857	-0.714286	-0.2	0	0	0.904762	-0.555556	0.283019	0.97619	0.384615	0.0909091	-0.75	-0.0181818	0.653846
										0.8	0.220779	-0.866667	0.166667	0.894737	0.333333	0.333333	-0.16	-0.886364	0.833333	-0.393502	-0.2	-0.333333	-0.323077	0.526316	0.333333	0.722222	-0.333333	0.167785	0.309091	-0.454545	-0.166667	0.333333	0.428571	0.517241	-0.142857	0.142857	-0.714286	-0.2	0	0	0.904762	-0.555556	0.283019	0.97619	0.384615	0.0909091	-0.75	-0.0181818	0.666667
										0.8	0.220779	-0.866667	0.166667	0.894737	0.333333	0.333333	-0.16	-0.886364	0.833333	-0.393502	-0.2	-0.333333	-0.32567	0.526316	0.333333	0.722222	-0.333333	0.167785	0.309091	-0.454545	-0.166667	0.333333	0.428571	0.517241	-0.142857	0.142857	-0.714286	-0.2	0	0	0.904762	-0.555556	0.283019	0.97619	0.384615	0.0909091	-0.75	-0.0181818	0.689655
										0.8	0.220779	-0.866667	0.166667	0.894737	0.333333	0.333333	-0.16	-0.886364	0.833333	-0.393502	-0.2	-0.333333	-0.32567	0.526316	0.333333	0.722222	-0.333333	0.167785	0.309091	-0.454545	-0.166667	0.333333	0.428571	0.517241	-0.142857	0.142857	-0.714286	-0.2	0	0	0.904762	-0.555556	0.283019	0.97619	0.384615	0.0909091	-0.75	-0.0181818	0.7
										0.8	0.220779	-0.866667	0.166667	0.894737	0.333333	0.333333	-0.16	-0.886364	0.833333	-0.393502	-0.2	-0.333333	-0.32567	0.526316	0.333333	0.722222	-0.333333	0.167785	0.309091	-0.454545	-0.166667	0.333333	0.428571	0.575758	-0.142857	0.142857	-0.714286	-0.2	0	0	0.904762	-0.555556	0.283019	0.97619	0.384615	0.0909091	-0.75	-0.0181818	0.714286
										0.8	0.220779	-0.866667	0.166667	0.894737	0.333333	0.333333	-0.16	-0.886364	0.833333	-0.393502	-0.2	-0.333333	-0.32567	0.526316	0.333333	0.722222	-0.333333	0.167785	0.309091	-0.454545	-0.166667	0.333333	0.428571	0.641026	-0.142857	0.142857	-0.714286	-0.2	0	0	0.904762	-0.555556	0.283019	0.97619	0.384615	0.0909091	-0.75	-0.0181818	0.71875
										0.8	0.220779	-0.866667	0.166667	0.894737	0.333333	0.333333	-0.16	-0.886364	0.833333	-0.393502	-0.2	-0.333333	-0.338346	0.526316	0.333333	0.722222	-0.333333	0.167785	0.309091	-0.454545	-0.166667	0.333333	0.428571	0.641026	-0.142857	0.142857	-0.714286	-0.2	0	0	0.904762	-0.555556	0.283019	0.97619	0.384615	0.0909091	-0.75	-0.0181818	0.723077
										0.8	0.220779	-0.866667	0.166667	0.894737	0.333333	0.333333	-0.16	-0.886364	0.833333	-0.393502	-0.2	-0.333333	-0.352941	0.526316	0.333333	0.722222	-0.333333	0.167785	0.309091	-0.454545	-0.166667	0.333333	0.428571	0.641026	-0.142857	0.142857	-0.714286	-0.2	0	0	0.904762	-0.555556	0.283019	0.97619	0.384615	0.0909091	-0.75	-0.0181818	0.723077
										0.8	0.220779	-0.866667	0.166667	0.894737	0.333333	0.333333	-0.16	-0.88764	0.833333	-0.393502	-0.2	-0.333333	-0.371429	0.526316	0.333333	0.722222	-0.333333	0.167785	0.309091	-0.454545	-0.166667	0.333333	0.428571	0.65	-0.142857	0.142857	-0.714286	-0.2	0	0	0.904762	-0.555556	0.283019	0.97619	0.384615	0.0909091	-0.75	-0.0181818	0.723077
										0.8	0.146342	-0.866667	0.166667	0.894737	0.333333	0.333333	-0.16	-0.88764	0.833333	-0.393502	-0.2	-0.333333	-0.384615	0.526316	0.333333	0.722222	-0.333333	0.167785	0.309091	-0.454545	-0.166667	0.333333	0.428571	0.65	-0.142857	0.142857	-0.714286	-0.2	0	0	0.904762	-0.555556	0.283019	0.97619	0.384615	0.0909091	-0.75	-0.0181818	0.723077
										0.8	0.105882	-0.866667	0.166667	0.894737	0.333333	0.333333	-0.16	-0.88764	0.833333	-0.393502	-0.2	-0.333333	-0.393103	0.526316	0.333333	0.722222	-0.333333	0.167785	0.309091	-0.454545	-0.166667	0.333333	0.428571	0.65	-0.142857	0.142857	-0.714286	-0.2	0	0	0.904762	-0.555556	0.283019	0.97619	0.384615	0.0909091	-0.75	-0.0181818	0.723077
										0.8	0.0681818	-0.866667	0.166667	0.894737	0.333333	0.333333	-0.16	-0.88764	0.833333	-0.393502	-0.2	-0.333333	-0.399317	0.526316	0.333333	0.722222	-0.333333	0.167785	0.309091	-0.454545	-0.166667	0.333333	0.428571	0.65	-0.142857	0.142857	-0.714286	-0.2	0	0	0.904762	-0.555556	0.283019	0.97619	0.384615	0.0909091	-0.75	-0.0181818	0.723077
										0.8	0.0107527	-0.866667	0.166667	0.894737	0.333333	0.333333	-0.16	-0.88764	0.833333	-0.393502	-0.2	-0.333333	-0.405405	0.526316	0.333333	0.72973	-0.333333	0.167785	0.309091	-0.454545	-0.166667	0.333333	0.428571	0.65	-0.142857	0.142857	-0.714286	-0.2	0	0	0.904762	-0.555556	0.283019	0.97619	0.384615	0.0909091	-0.75	-0.0181818	0.723077
										0.8	0	-0.866667	0.166667	0.894737	0.333333	0.333333	-0.16	-0.88764	0.833333	-0.393502	-0.2	-0.333333	-0.405405	0.526316	0.333333	0.72973	-0.333333	0.167785	0.309091	-0.454545	-0.166667	0.333333	0.428571	0.65	-0.142857	0.142857	-0.714286	-0.2	0	0	0.904762	-0.555556	0.283019	0.97619	0.384615	0.0909091	-0.75	-0.0181818	0.723077
										0.8	-0.0105263	-0.866667	0.166667	0.894737	0.333333	0.333333	-0.16	-0.88764	0.833333	-0.388489	-0.2	-0.333333	-0.407407	0.526316	0.333333	0.72973	-0.333333	0.167785	0.309091	-0.454545	-0.166667	0.333333	0.428571	0.65	-0.142857	0.142857	-0.714286	-0.2	0	0	0.904762	-0.555556	0.283019	0.97619	0.384615	0.0909091	-0.75	-0.0181818	0.723077
										0.8	-0.0105263	-0.866667	0.166667	0.894737	0.333333	0.333333	-0.16	-0.88764	0.833333	-0.388489	-0.2	-0.333333	-0.407407	0.526316	0.333333	0.72973	-0.333333	0.167785	0.309091	-0.454545	-0.166667	0.333333	0.428571	0.65	-0.142857	0.142857	-0.714286	-0.2	0	0	0.904762	-0.555556	0.283019	0.97619	0.384615	0.0909091	-0.75	-0.0181818	0.723077
										0.8	-0.0105263	-0.866667	0.166667	0.894737	0.333333	0.333333	-0.16	-0.88764	0.833333	-0.388489	-0.2	-0.333333	-0.415282	0.526316	0.333333	0.72973	-0.333333	0.167785	0.309091	-0.454545	-0.166667	0.333333	0.428571	0.65	-0.142857	0.142857	-0.714286	-0.2	0	0	0.904762	-0.555556	0.283019	0.97619	0.384615	0.0909091	-0.75	-0.0181818	0.723077
										0.8	-0.0105263	-0.866667	0.166667	0.894737	0.333333	0.333333	-0.16	-0.88764	0.833333	-0.388489	-0.2	-0.333333	-0.421053	0.526316	0.333333	0.72973	-0.333333	0.167785	0.309091	-0.454545	-0.166667	0.333333	0.428571	0.65	-0.142857	0.142857	-0.714286	-0.2	0	0	0.904762	-0.555556	0.283019	0.97619	0.384615	0.0909091	-0.75	-0.0181818	0.723077
										0.8	-0.0105263	-0.866667	0.166667	0.894737	0.333333	0.333333	-0.16	-0.88764	0.833333	-0.388489	-0.2	-0.333333	-0.421053	0.526316	0.333333	0.72973	-0.333333	0.167785	0.309091	-0.454545	-0.166667	0.333333	0.428571	0.65	-0.142857	0.142857	-0.714286	-0.2	0	0	0.904762	-0.555556	0.283019	0.97619	0.384615	0.0909091	-0.75	-0.0181818	0.723077
										0.8	-0.0105263	-0.866667	0.166667	0.894737	0.333333	0.333333	-0.16	-0.88764	0.833333	-0.373665	-0.2	-0.333333	-0.421053	0.526316	0.333333	0.72973	-0.333333	0.167785	0.309091	-0.454545	-0.166667	0.333333	0.428571	0.65	-0.142857	0.142857	-0.714286	-0.2	0	0	0.904762	-0.555556	0.283019	0.97619	0.384615	0.0909091	-0.75	-0.0181818	0.723077
										0.8	-0.0105263	-0.866667	0.166667	0.894737	0.333333	0.333333	-0.16	-0.88764	0.833333	-0.373665	-0.2	-0.333333	-0.422951	0.526316	0.333333	0.72973	-0.333333	0.167785	0.309091	-0.454545	-0.166667	0.333333	0.428571	0.65	-0.142857	0.142857	-0.714286	-0.2	0	0	0.904762	-0.555556	0.283019	0.97619	0.384615	0.0909091	-0.75	-0.0181818	0.723077
										0.8	-0.0105263	-0.866667	0.166667	0.894737	0.333333	0.333333	-0.16	-0.88764	0.833333	-0.373665	-0.2	-0.333333	-0.422951	0.526316	0.333333	0.72973	-0.333333	0.167785	0.309091	-0.454545	-0.166667	0.333333	0.428571	0.65	-0.142857	0.142857	-0.714286	-0.2	0	0	0.904762	-0.555556	0.283019	0.97619	0.384615	0.0909091	-0.75	-0.0181818	0.723077
										0.8	-0.0105263	-0.866667	0.166667	0.894737	0.333333	0.333333	-0.16	-0.88764	0.833333	-0.373665	-0.2	-0.333333	-0.422951	0.526316	0.333333	0.72973	-0.333333	0.167785	0.309091	-0.454545	-0.166667	0.333333	0.428571	0.65	-0.142857	0.142857	-0.714286	-0.2	0	0	0.904762	-0.555556	0.283019	0.97619	0.384615	0.0909091	-0.75	-0.0181818	0.723077
										0.8	-0.0105263	-0.866667	0.166667	0.894737	0.333333	0.333333	-0.16	-0.88764	0.833333	-0.373665	-0.2	-0.333333	-0.422951	0.526316	0.333333	0.72973	-0.333333	0.167785	0.309091	-0.454545	-0.166667	0.333333	0.428571	0.65	-0.142857	0.142857	-0.714286	-0.2	0	0	0.904762	-0.555556	0.283019	0.97619	0.384615	0.0909091	-0.75	-0.0181818	0.723077
										0.8	-0.0105263	-0.866667	0.166667	0.894737	0.333333	0.333333	-0.16	-0.88764	0.833333	-0.373665	-0.2	-0.333333	-0.422951	0.526316	0.333333	0.72973	-0.333333	0.167785	0.309091	-0.454545	-0.166667	0.333333	0.428571	0.65	-0.142857	0.142857	-0.714286	-0.2	0	0	0.904762	-0.555556	0.283019	0.97619	0.384615	0.0909091	-0.75	-0.0181818	0.723077
										0.8	-0.0105263	-0.866667	0.166667	0.894737	0.333333	0.333333	-0.16	-0.88764	0.833333	-0.373665	-0.2	-0.333333	-0.422951	0.526316	0.333333	0.72973	-0.333333	0.167785	0.309091	-0.454545	-0.166667	0.333333	0.428571	0.65	-0.142857	0.142857	-0.714286	-0.2	0	0	0.904762	-0.555556	0.283019	0.97619	0.384615	0.0909091	-0.75	-0.0181818	0.723077
										0.8	-0.0105263	-0.866667	0.166667	0.894737	0.333333	0.333333	-0.16	-0.88764	0.833333	-0.373665	-0.2	-0.333333	-0.422951	0.526316	0.333333	0.72973	-0.333333	0.167785	0.309091	-0.454545	-0.166667	0.333333	0.428571	0.65	-0.142857	0.142857	-0.818182	-0.2	0	0	0.904762	-0.555556	0.283019	0.97619	0.384615	0.0909091	-0.75	-0.0181818	0.723077
										0.8	-0.0105263	-0.866667	0.166667	0.894737	0.333333	0.333333	-0.16	-0.88764	0.833333	-0.373665	-0.2	-0.333333	-0.422951	0.526316	0.333333	0.72973	-0.333333	0.167785	0.309091	-0.454545	-0.166667	0.333333	0.428571	0.65	-0.142857	0.142857	-0.833333	-0.2	0	0	0.904762	-0.555556	0.283019	0.97619	0.384615	0.0909091	-0.75	-0.0181818	0.723077
										0.8	-0.0105263	-0.866667	0.166667	0.894737	0.333333	0.333333	-0.16	-0.88764	0.833333	-0.373665	-0.2	-0.333333	-0.422951	0.526316	0.333333	0.72973	-0.333333	0.167785	0.309091	-0.454545	-0.166667	0.333333	0.428571	0.65	-0.142857	0.142857	-0.833333	-0.2	0	0	0.904762	-0.555556	0.283019	0.97619	0.384615	0.0909091	-0.75	-0.0181818	0.723077
										0.8	-0.0105263	-0.866667	0.166667	0.894737	0.333333	0.333333	-0.16	-0.88764	0.833333	-0.373665	-0.2	-0.333333	-0.422951	0.526316	0.333333	0.72973	-0.333333	0.167785	0.309091	-0.454545	-0.166667	0.333333	0.428571	0.65	-0.142857	0.142857	-0.833333	0.0526316	0	0	0.904762	-0.555556	0.283019	0.97619	0.384615	0.0909091	-0.75	-0.0181818	0.723077
										0.8	-0.0105263	-0.866667	0.166667	0.894737	0.333333	0.333333	-0.16	-0.88764	0.833333	-0.373665	-0.2	-0.333333	-0.422951	0.526316	0.333333	0.72973	-0.333333	0.167785	0.309091	-0.454545	-0.166667	0.333333	0.428571	0.65	-0.142857	0.142857	-0.833333	0.0526316	0	0	0.904762	-0.555556	0.283019	0.97619	0.384615	0.0909091	-0.75	-0.0181818	0.723077
										0.8	-0.0105263	-0.866667	0.166667	0.894737	0.333333	0.333333	-0.16	-0.88764	0.833333	-0.373665	-0.2	-0.333333	-0.42671	0.526316	0.333333	0.72973	-0.333333	0.167785	0.309091	-0.454545	-0.166667	0.333333	0.428571	0.65	-0.142857	0.142857	-0.833333	0.0526316	0	0	0.904762	-0.555556	0.283019	0.97619	0.384615	0.0909091	-0.75	-0.0181818	0.723077
										0.8	-0.0105263	-0.866667	0.166667	0.894737	0.333333	0.333333	-0.16	-0.88764	0.833333	-0.373665	-0.2	-0.333333	-0.43949	0.526316	0.333333	0.72973	-0.333333	0.167785	0.309091	-0.454545	-0.166667	0.333333	0.428571	0.65	-0.142857	0.142857	-0.833333	0.142857	0	0	0.904762	-0.555556	0.283019	0.97619	0.384615	0.0909091	-0.75	-0.0181818	0.623188
										0.8	-0.0105263	-0.866667	0.166667	0.894737	0.333333	0.333333	-0.16	-0.88764	0.833333	-0.373665	-0.2	-0.333333	-0.44127	0.526316	0.333333	0.72973	-0.333333	0.167785	0.309091	-0.454545	-0.166667	0.333333	0.428571	0.65	-0.142857	0.142857	-0.833333	0.217391	0	0	0.904762	-0.555556	0.283019	0.97619	0.384615	0.0909091	-0.75	-0.0181818	0.577465
										0.8	-0.0105263	-0.866667	0.166667	0.894737	0.333333	0.333333	-0.16	-0.88764	0.833333	-0.373665	-0.2	-0.333333	-0.443038	0.526316	0.333333	0.72973	-0.333333	0.167785	0.309091	-0.454545	-0.166667	0.333333	0.428571	0.65	-0.142857	0.142857	-0.833333	0.217391	0	0	0.904762	-0.555556	0.283019	0.97619	0.384615	0.0909091	-0.75	-0.0181818	0.577465
										0.8	-0.0105263	-0.866667	0.166667	0.894737	0.333333	0.333333	-0.16	-0.88764	0.833333	-0.373665	-0.2	-0.333333	-0.443038	0.526316	0.333333	0.72973	-0.333333	0.167785	0.309091	-0.454545	-0.166667	0.333333	0.428571	0.65	-0.142857	0.142857	-0.833333	0.217391	0	0	0.904762	-0.555556	0.283019	0.97619	0.384615	0.0909091	-0.75	-0.0181818	0.577465
										0.8	-0.0105263	-0.866667	0.166667	0.894737	0.333333	0.333333	-0.16	-0.88764	0.833333	-0.373665	-0.2	-0.333333	-0.443038	0.526316	0.333333	0.72973	-0.333333	0.167785	0.309091	-0.454545	-0.166667	0.333333	0.428571	0.65	-0.142857	0.142857	-0.833333	0.25	0	0	0.904762	-0.555556	0.283019	0.97619	0.384615	0.0909091	-0.75	-0.0181818	0.577465
										0.8	-0.0105263	-0.866667	0.166667	0.894737	0.333333	0.333333	-0.16	-0.88764	0.833333	-0.373665	-0.2	-0.333333	-0.443038	0.526316	0.333333	0.72973	-0.333333	0.167785	0.309091	-0.454545	-0.166667	0.333333	0.428571	0.65	-0.142857	0.142857	-0.833333	0.25	0	0	0.904762	-0.555556	0.283019	0.97619	0.384615	0.0909091	-0.75	-0.0181818	0.577465
										0.8	-0.0105263	-0.866667	0.166667	0.894737	0.333333	0.333333	-0.16	-0.88764	0.833333	-0.373665	-0.2	-0.333333	-0.443038	0.526316	0.333333	0.72973	-0.333333	0.167785	0.309091	-0.454545	-0.166667	0.333333	0.428571	0.65	-0.142857	0.142857	-0.833333	0.28	0	0	0.904762	-0.555556	0.283019	0.97619	0.384615	0.0909091	-0.75	-0.0181818	0.577465
										0.8	-0.0105263	-0.866667	0.166667	0.894737	0.333333	0.333333	-0.16	-0.88764	0.833333	-0.373665	-0.2	-0.333333	-0.443038	0.526316	0.333333	0.72973	-0.333333	0.167785	0.309091	-0.454545	-0.166667	0.333333	0.428571	0.65	-0.142857	0.142857	-0.833333	0.307692	0	0	0.904762	-0.555556	0.283019	0.97619	0.384615	0.0909091	-0.75	-0.0181818	0.577465
										0.8	-0.0105263	-0.866667	0.166667	0.894737	0.333333	0.333333	-0.16	-0.88764	0.833333	-0.373665	-0.2	-0.333333	-0.443038	0.526316	0.333333	0.72973	-0.333333	0.167785	0.309091	-0.454545	-0.166667	0.333333	0.428571	0.65	-0.142857	0.142857	-0.833333	0.333333	0	0	0.904762	-0.555556	0.283019	0.97619	0.384615	0.0909091	-0.75	-0.0181818	0.577465
										0.8	-0.0105263	-0.866667	0.166667	0.894737	-0.272727	0.333333	-0.16	-0.88764	0.833333	-0.373665	-0.2	-0.333333	-0.443038	0.526316	0.333333	0.72973	-0.333333	0.167785	0.309091	-0.454545	-0.166667	0.333333	0.428571	0.65	-0.142857	0.142857	-0.833333	0.357143	0	0	0.904762	-0.666667	0.283019	0.97619	0.384615	0.0909091	-0.75	-0.0181818	0.577465
										0.8	-0.0105263	-0.866667	0.166667	0.894737	-0.428571	0.333333	-0.16	-0.88764	0.833333	-0.373665	-0.2	-0.333333	-0.443038	0.526316	0.333333	0.72973	-0.333333	0.167785	0.309091	-0.454545	-0.166667	0.333333	0.428571	0.65	-0.142857	0.142857	-0.833333	0.37931	0	0	0.904762	-0.764706	0.283019	0.97619	0.384615	0.0909091	-0.75	-0.0181818	0.577465
										0.8	-0.0105263	-0.866667	0.166667	0.894737	-0.466667	0.333333	-0.16	-0.88764	0.833333	-0.373665	-0.2	-0.333333	-0.443038	0.526316	0.333333	0.72973	-0.333333	0.167785	0.309091	-0.454545	-0.166667	0.333333	0.428571	0.65	-0.142857	0.142857	-0.833333	0.37931	0	0	0.904762	-0.8	0.283019	0.97619	0.384615	0.0909091	-0.75	-0.0181818	0.577465
										0.8	-0.0105263	-0.866667	0.166667	0.894737	-0.636364	0.333333	-0.16	-0.88764	0.833333	-0.373665	-0.2	-0.333333	-0.443038	0.526316	0.333333	0.72973	-0.333333	0.167785	0.309091	-0.454545	-0.166667	0.333333	0.428571	0.65	-0.142857	0.142857	-0.833333	0.485714	0	0	0.904762	-0.84	0.283019	0.97619	0.384615	0.0909091	-0.75	-0.0181818	0.577465
										0.8	-0.0105263	-0.866667	0.166667	0.894737	-0.666667	0.333333	-0.16	-0.88764	0.833333	-0.373665	-0.2	-0.333333	-0.443038	0.526316	0.333333	0.72973	-0.333333	0.167785	0.309091	-0.454545	-0.166667	0.333333	0.428571	0.65	-0.142857	0.142857	-0.833333	0.485714	0	0	0.904762	-0.885714	0.283019	0.97619	0.384615	0.0909091	-0.75	-0.0181818	0.577465
										0.8	-0.0105263	-0.866667	0.166667	0.894737	-0.666667	0.333333	-0.16	-0.88764	0.833333	-0.373665	-0.2	-0.333333	-0.443038	0.526316	0.333333	0.72973	-0.333333	0.167785	0.309091	-0.454545	-0.166667	0.333333	0.428571	0.65	-0.142857	0.142857	-0.833333	0.485714	0	0	0.904762	-0.888889	0.283019	0.97619	0.384615	0.0909091	-0.75	-0.0181818	0.577465
										0.8	-0.0105263	-0.866667	0.166667	0.894737	-0.666667	0.333333	-0.16	-0.88764	0.833333	-0.373665	-0.2	-0.333333	-0.443038	0.526316	0.333333	0.72973	-0.333333	0.167785	0.309091	-0.454545	-0.166667	0.333333	0.428571	0.65	-0.142857	0.142857	-0.833333	0.485714	0	0	0.904762	-0.888889	0.283019	0.97619	0.384615	0.0909091	-0.75	-0.0181818	0.577465
										0.8	-0.0105263	-0.866667	0.166667	0.894737	-0.666667	0.333333	-0.16	-0.88764	0.833333	-0.373665	-0.2	-0.333333	-0.443038	0.526316	0.333333	0.72973	-0.333333	0.167785	0.309091	-0.454545	-0.166667	0.333333	0.428571	0.65	-0.142857	0.142857	-0.833333	0.485714	0	0	0.904762	-0.888889	0.283019	0.97619	0.384615	0.0909091	-0.75	-0.0357143	0.577465
										0.8	-0.0105263	-0.866667	0.166667	0.894737	-0.666667	0.333333	-0.16	-0.88764	0.833333	-0.373665	-0.2	-0.333333	-0.443038	0.526316	0.333333	0.72973	-0.333333	0.167785	0.309091	-0.454545	-0.166667	0.333333	0.428571	0.65	-0.142857	0.142857	-0.833333	0.485714	0	0	0.904762	-0.888889	0.283019	0.97619	0.384615	0.0909091	-0.75	-0.0357143	0.577465
										0.8	-0.0105263	-0.866667	0.166667	0.894737	-0.666667	0.333333	-0.16	-0.88764	0.833333	-0.373665	-0.2	-0.333333	-0.443038	0.526316	0.333333	0.72973	-0.333333	0.167785	0.309091	-0.454545	-0.166667	0.333333	0.428571	0.65	-0.142857	0.142857	-0.833333	0.485714	0	0	0.904762	-0.888889	0.283019	0.97619	0.384615	0.0909091	-0.75	-0.0357143	0.577465
										0.8	-0.0105263	-0.866667	0.166667	0.894737	-0.666667	0.333333	-0.16	-0.888889	0.833333	-0.373665	-0.2	-0.333333	-0.443038	0.526316	0.333333	0.72973	-0.333333	0.167785	0.309091	-0.454545	-0.166667	0.333333	0.428571	0.65	-0.142857	0.142857	-0.833333	0.485714	0	0	0.904762	-0.888889	0.283019	0.97619	0.384615	0.0909091	-0.75	-0.0357143	0.577465
										0.8	-0.0105263	-0.866667	0.166667	0.894737	-0.666667	0.333333	-0.16	-0.888889	0.833333	-0.373665	-0.2	-0.333333	-0.443038	0.526316	0.333333	0.72973	-0.333333	0.167785	0.309091	-0.454545	-0.166667	0.333333	0.428571	0.65	-0.142857	0.142857	-0.833333	0.485714	0	0	0.904762	-0.888889	0.283019	0.97619	0.384615	0.0909091	-0.75	-0.0357143	0.577465
										0.8	-0.0105263	-0.866667	0.166667	0.894737	-0.666667	0.333333	-0.16	-0.888889	0.833333	-0.373665	-0.2	-0.333333	-0.443038	0.526316	0.333333	0.72973	-0.333333	0.167785	0.309091	-0.454545	-0.166667	0.333333	0.428571	0.65	-0.142857	0.142857	-0.857143	0.485714	0	0	0.904762	-0.888889	0.283019	0.97619	0.384615	0.0909091	-0.75	-0.0357143	0.577465
										0.8	-0.0105263	-0.866667	0.166667	0.894737	-0.666667	0.333333	-0.16	-0.888889	0.833333	-0.373665	-0.2	-0.333333	-0.443038	0.526316	0.333333	0.72973	-0.333333	0.167785	0.309091	-0.454545	-0.166667	0.333333	0.428571	0.65	-0.142857	0.142857	-0.888889	0.485714	0	0	0.904762	-0.888889	0.283019	0.97619	0.384615	0.0909091	-0.75	-0.0357143	0.577465
										0.8	-0.0105263	-0.866667	0.166667	0.894737	-0.666667	0.333333	-0.16	-0.888889	0.833333	-0.373665	-0.2	-0.333333	-0.443038	0.526316	0.333333	0.72973	-0.333333	0.167785	0.309091	-0.454545	-0.166667	0.333333	0.428571	0.65	-0.142857	0.142857	-0.888889	0.485714	0	0	0.904762	-0.888889	0.283019	0.97619	0.384615	0.0434783	-0.75	-0.0357143	0.577465
										0.8	-0.0105263	-0.866667	0.166667	0.894737	-0.666667	0.333333	-0.16	-0.888889	0.833333	-0.373665	-0.2	-0.333333	-0.443038	0.526316	0.333333	0.72973	-0.333333	0.167785	0.309091	-0.454545	-0.166667	0.333333	0.428571	0.65	-0.142857	0.142857	-0.888889	0.485714	0	0	0.904762	-0.888889	0.283019	0.97619	0.384615	0.0434783	-0.75	-0.0357143	0.577465
										0.8	-0.0105263	-0.866667	0.166667	0.894737	-0.666667	0.333333	-0.16	-0.888889	0.833333	-0.373665	-0.2	-0.333333	-0.443038	0.526316	0.333333	0.72973	-0.333333	0.167785	0.309091	-0.454545	-0.166667	0.333333	0.428571	0.65	-0.142857	0.142857	-0.888889	0.485714	0	0	0.904762	-0.888889	0.283019	0.97619	0.384615	0.0434783	-0.75	-0.0357143	0.577465
										0.8	-0.0105263	-0.866667	0.166667	0.894737	-0.666667	0.333333	-0.16	-0.888889	0.833333	-0.373665	-0.2	-0.333333	-0.443038	0.526316	0.333333	0.72973	-0.333333	0.167785	0.309091	-0.454545	-0.166667	0.333333	0.428571	0.65	-0.142857	0.142857	-0.888889	0.485714	0	0	0.904762	-0.888889	0.283019	0.97619	0.384615	0.0434783	-0.75	-0.0357143	0.577465
										0.8	-0.0105263	-0.866667	0.166667	0.894737	-0.666667	0.333333	-0.16	-0.888889	0.833333	-0.368794	-0.2	-0.333333	-0.443038	0.526316	0.333333	0.72973	-0.333333	0.167785	0.309091	-0.454545	-0.166667	0.333333	0.428571	0.65	-0.142857	0.142857	-0.888889	0.485714	0	0	0.904762	-0.888889	0.283019	0.97619	0.384615	0.0434783	-0.75	-0.0357143	0.577465
										0.8	-0.0105263	-0.866667	0.166667	0.894737	-0.666667	0.333333	-0.16	-0.888889	0.833333	-0.368794	-0.2	-0.333333	-0.443038	0.526316	0.333333	0.72973	-0.333333	0.167785	0.309091	-0.454545	-0.166667	0.333333	0.428571	0.65	-0.142857	0.142857	-0.888889	0.485714	0	0	0.904762	-0.888889	0.283019	0.97619	0.384615	0.0434783	-0.777778	-0.0357143	0.577465
										0.8	-0.0105263	-0.866667	0.166667	0.894737	-0.666667	0.333333	-0.16	-0.888889	0.833333	-0.368794	-0.2	-0.333333	-0.443038	0.526316	0.333333	0.72973	-0.333333	0.167785	0.309091	-0.454545	-0.166667	0.333333	0.428571	0.65	-0.142857	0.142857	-0.888889	0.485714	0	0	0.904762	-0.888889	0.283019	0.97619	0.384615	0.0434783	-0.777778	-0.0357143	0.577465
										0.8	-0.0105263	-0.866667	0.166667	0.894737	-0.666667	0.333333	-0.16	-0.888889	0.833333	-0.368794	-0.2	-0.333333	-0.443038	0.526316	0.333333	0.72973	-0.333333	0.167785	0.309091	-0.454545	-0.166667	0.333333	0.428571	0.65	-0.142857	0.142857	-0.888889	0.485714	0	0	0.904762	-0.888889	0.283019	0.97619	0.384615	0.0434783	-0.777778	-0.0357143	0.577465
										0.8	-0.0105263	-0.866667	0.166667	0.894737	-0.666667	0.333333	-0.16	-0.888889	0.833333	-0.368794	-0.2	-0.333333	-0.443038	0.526316	0.333333	0.72973	-0.333333	0.167785	0.309091	-0.454545	-0.166667	0.333333	0.428571	0.65	-0.142857	0.142857	-0.888889	0.485714	0	0	0.904762	-0.888889	0.283019	0.97619	0.384615	0.0434783	-0.777778	-0.0357143	0.577465
										0.8	-0.0105263	-0.866667	0.166667	0.894737	-0.666667	0.333333	-0.16	-0.888889	0.833333	-0.368794	-0.2	-0.333333	-0.443038	0.526316	0.333333	0.72973	-0.333333	0.167785	0.309091	-0.454545	-0.166667	0.333333	0.428571	0.658537	-0.142857	0.142857	-0.888889	0.485714	0	0	0.904762	-0.888889	0.283019	0.97619	0.384615	0.0434783	-0.777778	-0.0357143	0.577465
										0.8	-0.0105263	-0.866667	0.166667	0.894737	-0.666667	0.333333	-0.16	-0.888889	0.833333	-0.368794	-0.2	-0.333333	-0.443038	0.526316	0.333333	0.72973	-0.333333	0.167785	0.285714	-0.454545	-0.166667	0.333333	0.428571	0.658537	-0.142857	0.142857	-0.888889	0.485714	0	0	0.904762	-0.888889	0.283019	0.97619	0.384615	0.0434783	-0.777778	-0.0357143	0.577465
										0.8	-0.0105263	-0.866667	0.166667	0.894737	-0.666667	0.333333	-0.16	-0.888889	0.833333	-0.368794	-0.2	-0.333333	-0.443038	0.526316	0.333333	0.72973	-0.333333	0.167785	0.180328	-0.454545	-0.166667	0.333333	0.428571	0.658537	-0.142857	0.142857	-0.888889	0.485714	0	0	0.904762	-0.888889	0.283019	0.97619	0.384615	0.0434783	-0.777778	-0.0357143	0.577465
										0.8	-0.0105263	-0.866667	0.166667	0.894737	-0.666667	0.333333	-0.16	-0.888889	0.833333	-0.368794	-0.2	-0.333333	-0.45	0.526316	0.333333	0.72973	-0.333333	0.167785	0.180328	-0.454545	-0.166667	0.333333	0.428571	0.658537	-0.142857	0.142857	-0.888889	0.485714	0	0	0.904762	-0.888889	0.283019	0.97619	0.384615	0.0434783	-0.777778	-0.0357143	0.577465
										0.8	-0.0105263	-0.866667	0.166667	0.894737	-0.666667	0.333333	-0.16	-0.888889	0.833333	-0.368794	-0.2	-0.333333	-0.458462	0.526316	0.333333	0.72973	-0.333333	0.167785	0.180328	-0.454545	-0.166667	0.333333	0.428571	0.658537	-0.142857	0.142857	-0.888889	0.485714	0	0	0.904762	-0.789474	0.283019	0.97619	0.384615	0.0434783	-0.777778	-0.0357143	0.577465
										0.8	-0.0105263	-0.866667	0.166667	0.894737	-0.666667	0.333333	-0.16	-0.888889	0.833333	-0.368794	-0.2	-0.333333	-0.463415	0.526316	0.333333	0.72973	-0.333333	0.178808	0.180328	-0.454545	-0.166667	0.333333	0.428571	0.658537	-0.142857	0.142857	-0.888889	0.485714	0	0	0.904762	-0.619048	0.283019	0.97619	0.384615	0.0434783	-0.777778	-0.0357143	0.577465
										0.8	-0.0105263	-0.866667	0.166667	0.894737	-0.666667	0.333333	-0.16	-0.888889	0.833333	-0.368794	-0.2	-0.333333	-0.471471	0.526316	0.333333	0.72973	-0.333333	0.194805	0.180328	-0.454545	-0.166667	0.333333	0.428571	0.658537	-0.142857	0.142857	-0.894737	0.485714	0	0	0.904762	-0.581395	0.283019	0.97619	0.384615	0.0434783	-0.777778	-0.0357143	0.577465
										0.8	-0.0105263	-0.866667	0.166667	0.894737	-0.666667	0.333333	-0.16	-0.888889	0.833333	-0.368794	-0.2	-0.333333	-0.47929	0.526316	0.333333	0.72973	-0.333333	0.220126	0.180328	-0.454545	-0.166667	0.333333	0.428571	0.658537	-0.142857	0.142857	-0.894737	0.485714	0	0	0.904762	-0.581395	0.283019	0.97619	0.384615	0.0434783	-0.777778	-0.0357143	0.577465
										0.8	-0.0105263	-0.866667	0.166667	0.894737	-0.666667	0.333333	-0.16	-0.888889	0.833333	-0.368794	-0.2	-0.333333	-0.48538	0.526316	0.333333	0.72973	-0.333333	0.220126	0.180328	-0.454545	-0.166667	0.333333	0.428571	0.658537	-0.142857	0.142857	-0.894737	0.485714	0	0	0.904762	-0.446808	0.283019	0.97619	0.384615	0.0434783	-0.777778	-0.0357143	0.577465
										0.8	-0.0105263	-0.866667	0.166667	0.894737	-0.666667	0.333333	-0.16	-0.888889	0.833333	-0.368794	-0.2	-0.333333	-0.488372	0.526316	0.333333	0.72973	-0.333333	0.220126	0.180328	-0.454545	-0.166667	0.333333	0.428571	0.658537	-0.142857	0.142857	-0.894737	0.485714	0	0	0.904762	-0.416667	0.283019	0.97619	0.384615	0	-0.777778	-0.0357143	0.577465
										0.8	-0.0105263	-0.866667	0.166667	0.894737	-0.666667	0.333333	-0.16	-0.888889	0.833333	-0.368794	-0.2	-0.333333	-0.492795	0.526316	0.333333	0.72973	-0.333333	0.225	0.180328	-0.454545	-0.166667	0.333333	0.428571	0.658537	-0.142857	0.142857	-0.894737	0.485714	0	0	0.904762	-0.387755	0.296296	0.97619	0.384615	0	-0.777778	-0.0357143	0.577465
										0.8	-0.0105263	-0.866667	0.166667	0.894737	-0.666667	0.333333	-0.16	-0.888889	0.833333	-0.363958	-0.2	-0.333333	-0.492795	0.526316	0.333333	0.72973	-0.333333	0.225	0.180328	-0.454545	-0.166667	0.478261	0.428571	0.658537	-0.142857	0.142857	-0.894737	0.485714	0	0	0.904762	-0.387755	0.296296	0.97619	0.384615	0	-0.777778	-0.0357143	0.577465
										0.8	-0.0105263	-0.866667	0.166667	0.894737	-0.666667	0.333333	-0.16	-0.888889	0.833333	-0.363958	-0.2	-0.333333	-0.492795	0.526316	0.333333	0.72973	-0.333333	0.225	0.180328	-0.454545	-0.166667	0.6	0.428571	0.658537	-0.142857	0.142857	-0.894737	0.485714	0	0	0.904762	-0.387755	0.22807	0.97619	0.384615	0	-0.777778	-0.0357143	0.577465
										0.8	-0.0105263	-0.866667	0.166667	0.894737	-0.666667	0.333333	-0.16	-0.888889	0.833333	-0.363958	-0.2	-0.333333	-0.492795	0.526316	0.333333	0.72973	-0.333333	0.225	0.180328	-0.454545	-0.166667	0.6	0.428571	0.658537	-0.142857	0.142857	-0.894737	0.485714	0	0	0.904762	-0.387755	0.22807	0.97619	0.384615	0	-0.777778	-0.0357143	0.577465
										0.8	-0.0105263	-0.866667	0.166667	0.894737	-0.666667	0.333333	-0.16	-0.888889	0.833333	-0.363958	-0.2	-0.333333	-0.497143	0.526316	0.333333	0.72973	-0.333333	0.225	0.180328	-0.454545	-0.166667	0.6	0.428571	0.658537	-0.142857	0.142857	-0.894737	0.485714	0	0	0.904762	-0.333333	0.22807	0.97619	0.384615	0	-0.777778	-0.0357143	0.577465
										0.8	-0.0105263	-0.866667	0.166667	0.894737	-0.666667	0.333333	-0.16	-0.888889	0.833333	-0.363958	-0.2	-0.333333	-0.501416	0.526316	0.333333	0.72973	-0.333333	0.225	0.180328	-0.454545	-0.166667	0.6	0.428571	0.658537	-0.142857	0.142857	-0.894737	0.485714	0	0	0.904762	-0.333333	0.22807	0.97619	0.384615	0	-0.777778	-0.0357143	0.577465
										0.8	-0.0105263	-0.866667	0.166667	0.894737	-0.666667	0.333333	-0.16	-0.888889	0.833333	-0.363958	-0.2	-0.333333	-0.505618	0.526316	0.333333	0.72973	-0.333333	0.225	0.180328	-0.454545	-0.166667	0.6	0.428571	0.658537	-0.142857	0.142857	-0.894737	0.485714	0	0	0.904762	-0.333333	0.22807	0.97619	0.384615	0	-0.777778	-0.0357143	0.577465
										0.8	-0.0105263	-0.866667	0.166667	0.894737	-0.666667	0.333333	-0.16	-0.888889	0.833333	-0.363958	-0.2	-0.333333	-0.507003	0.526316	0.333333	0.72973	-0.333333	0.225	0.180328	-0.454545	-0.166667	0.6	0.428571	0.658537	-0.142857	0.142857	-0.894737	0.485714	0	0	0.904762	-0.307692	0.22807	0.97619	0.384615	0	-0.777778	-0.0357143	0.577465
										0.8	-0.0105263	-0.866667	0.166667	0.894737	-0.666667	0.333333	-0.16	-0.888889	0.833333	-0.363958	-0.2	-0.333333	-0.509749	0.526316	0.333333	0.72973	-0.333333	0.225	0.180328	-0.454545	-0.166667	0.6	0.428571	0.658537	-0.142857	0.142857	-0.894737	0.485714	0	0	0.904762	-0.259259	0.22807	0.97619	0.384615	0	-0.777778	-0.0357143	0.577465
										0.8	-0.0105263	-0.866667	0.166667	0.894737	-0.666667	0.333333	-0.16	-0.888889	0.833333	-0.363958	-0.2	-0.333333	-0.511111	0.526316	0.333333	0.72973	-0.333333	0.225	0.180328	-0.454545	-0.166667	0.6	0.428571	0.658537	-0.142857	0.142857	-0.894737	0.5	0	0	0.904762	-0.236364	0.22807	0.97619	0.384615	0	-0.777778	-0.0357143	0.577465
										0.8	-0.0105263	-0.866667	0.166667	0.894737	-0.666667	0.333333	-0.16	-0.888889	0.833333	-0.363958	-0.2	-0.333333	-0.511111	0.526316	0.333333	0.72973	-0.333333	0.225	0.180328	-0.454545	-0.166667	0.6	0.428571	0.658537	-0.142857	0.142857	-0.894737	0.5	0	0	0.904762	-0.192983	0.22807	0.97619	0.384615	0	-0.777778	-0.0357143	0.577465
										0.8	-0.0105263	-0.866667	0.166667	0.894737	-0.666667	0.333333	-0.16	-0.888889	0.833333	-0.363958	-0.2	-0.333333	-0.512465	0.526316	0.333333	0.72973	-0.333333	0.225	0.180328	-0.454545	-0.166667	0.6	0.428571	0.658537	-0.142857	0.142857	-0.894737	0.5	0	0	0.904762	-0.133333	0.22807	0.97619	0.384615	0	-0.777778	-0.0357143	0.577465
										0.8	-0.0105263	-0.866667	0.166667	0.894737	-0.666667	0.333333	-0.16	-0.888889	0.833333	-0.363958	-0.2	-0.333333	-0.513812	0.526316	0.333333	0.72973	-0.333333	0.225	0.180328	-0.454545	-0.166667	0.6	0.428571	0.658537	-0.142857	0.142857	-0.894737	0.5	0	0	0.904762	-0.114754	0.22807	0.97619	0.384615	0	-0.777778	-0.0357143	0.577465
										0.8	-0.0105263	-0.866667	0.166667	0.894737	-0.666667	0.333333	-0.16	-0.888889	0.833333	-0.363958	-0.2	-0.333333	-0.515151	0.526316	0.333333	0.72973	-0.333333	0.225	0.180328	-0.454545	-0.166667	0.6	0.428571	0.658537	-0.142857	0.142857	-0.894737	0.5	0	0	0.904762	-0.114754	0.22807	0.97619	0.384615	0	-0.777778	-0.0357143	0.577465
										0.8	-0.0105263	-0.866667	0.166667	0.894737	-0.666667	0.333333	-0.16	-0.888889	0.833333	-0.363958	-0.2	-0.333333	-0.516483	0.526316	0.333333	0.72973	-0.333333	0.225	0.180328	-0.454545	-0.166667	0.6	0.428571	0.658537	-0.142857	0.142857	-0.894737	0.5	0	0	0.904762	-0.0793651	0.22807	0.97619	0.384615	0	-0.777778	-0.0357143	0.577465
										0.8	-0.0105263	-0.866667	0.166667	0.894737	-0.666667	0.333333	-0.16	-0.888889	0.833333	-0.363958	-0.2	-0.333333	-0.519126	0.526316	0.333333	0.72973	-0.333333	0.225	0.180328	-0.454545	-0.166667	0.6	0.428571	0.658537	-0.142857	0.142857	-0.894737	0.5	0	0	0.904762	-0.0625	0.22807	0.97619	0.384615	-0.04	-0.777778	-0.0357143	0.577465
										0.8	-0.0105263	-0.866667	0.166667	0.894737	-0.666667	0.333333	-0.16	-0.888889	0.833333	-0.363958	-0.2	-0.333333	-0.520436	0.526316	0.333333	0.72973	-0.333333	0.225	0.180328	-0.454545	-0.166667	0.6	0.428571	0.658537	-0.142857	0.142857	-0.894737	0.5	0	0	0.904762	-0.0625	0.22807	0.97619	0.384615	-0.04	-0.777778	-0.0357143	0.577465
										0.8	-0.0105263	-0.866667	0.166667	0.894737	-0.666667	0.333333	-0.16	-0.888889	0.833333	-0.363958	-0.2	-0.333333	-0.520436	0.526316	0.333333	0.72973	-0.333333	0.225	0.180328	-0.454545	-0.166667	0.6	0.428571	0.658537	-0.142857	0.142857	-0.894737	0.5	0	0	0.904762	-0.0149254	0.22807	0.97619	0.384615	-0.04	-0.777778	-0.0357143	0.577465
										0.8	-0.0105263	-0.866667	0.166667	0.894737	-0.666667	0.333333	-0.16	-0.888889	0.833333	-0.359155	-0.2	-0.333333	-0.521739	0.526316	0.333333	0.72973	-0.333333	0.225	0.180328	-0.454545	-0.166667	0.6	0.428571	0.581395	-0.4	0.142857	-0.894737	0.5	0	0	0.904762	0.0144928	0.22807	0.97619	0.384615	-0.04	-0.777778	-0.0357143	0.577465
										0.8	-0.0105263	-0.866667	0.166667	0.894737	-0.666667	0.333333	-0.16	-0.888889	0.833333	-0.359155	-0.2	-0.333333	-0.521739	0.526316	0.333333	0.72973	-0.333333	0.225	0.180328	-0.454545	-0.166667	0.6	0.428571	0.545455	-0.4	0.142857	-0.894737	0.5	0	0	0.904762	0.0285714	0.22807	0.97619	0.384615	-0.04	-0.777778	-0.0357143	0.577465
										0.8	-0.0105263	-0.866667	0.166667	0.894737	-0.666667	0.333333	-0.16	-0.888889	0.833333	-0.359155	-0.2	-0.333333	-0.523035	0.526316	0.333333	0.72973	-0.333333	0.225	0.180328	-0.454545	-0.166667	0.6	0.428571	0.545455	-0.4	0.142857	-0.894737	0.5	0	0	0.904762	0.0285714	0.22807	0.97619	0.384615	-0.0769231	-0.777778	-0.0357143	0.577465
										0.8	-0.0105263	-0.866667	0.166667	0.894737	-0.666667	0.333333	-0.16	-0.888889	0.833333	-0.359155	-0.2	-0.333333	-0.525606	0.526316	0.333333	0.72973	-0.333333	0.225	0.180328	-0.454545	-0.166667	0.6	0.428571	0.545455	-0.4	0.142857	-0.894737	0.5	0	0	0.904762	0.0555556	0.22807	0.97619	0.384615	-0.0769231	-0.777778	-0.0357143	0.577465
										0.8	-0.0105263	-0.866667	0.166667	0.894737	-0.666667	0.333333	-0.16	-0.888889	0.833333	-0.359155	-0.2	-0.333333	-0.529412	0.526316	0.333333	0.72973	-0.333333	0.225	0.180328	-0.454545	-0.166667	0.6	0.428571	0.545455	-0.4	0.142857	-0.9	0.5	0	0	0.904762	0.0933333	0.22807	0.97619	0.384615	-0.0769231	-0.777778	-0.0357143	0.577465
										0.8	-0.0105263	-0.866667	0.166667	0.894737	-0.666667	0.333333	-0.16	-0.888889	0.833333	-0.359155	-0.2	-0.333333	-0.531915	0.526316	0.333333	0.72973	-0.333333	0.225	0.180328	-0.454545	-0.166667	0.6	0.428571	0.545455	-0.4	0.142857	-0.9	0.5	0	0	0.904762	0.13924	0.22807	0.97619	0.384615	-0.0769231	-0.777778	-0.0357143	0.577465
										0.8	-0.0105263	-0.866667	0.166667	0.894737	-0.666667	0.333333	-0.16	-0.888889	0.833333	-0.359155	-0.2	-0.333333	-0.531915	0.526316	0.333333	0.72973	-0.333333	0.225	0.180328	-0.454545	-0.166667	0.6	0.428571	0.545455	-0.4	0.142857	-0.9	0.5	0	0	0.904762	0.13924	0.22807	0.97619	0.384615	-0.0769231	-0.777778	-0.0357143	0.577465
										0.8	-0.0105263	-0.866667	0.166667	0.894737	-0.666667	0.333333	-0.16	-0.888889	0.833333	-0.359155	-0.2	-0.333333	-0.533157	0.526316	0.333333	0.72973	-0.333333	0.225	0.180328	-0.454545	-0.166667	0.6	0.428571	0.545455	-0.4	0.142857	-0.9	0.5	0	0	0.904762	0.160494	0.22807	0.97619	0.384615	-0.0769231	-0.777778	-0.0357143	0.577465
										0.8	-0.0105263	-0.866667	0.166667	0.894737	-0.666667	0.333333	-0.16	-0.888889	0.833333	-0.359155	-0.2	-0.333333	-0.533157	0.526316	0.333333	0.72973	-0.333333	0.225	0.180328	-0.454545	-0.166667	0.6	0.428571	0.545455	-0.4	0.142857	-0.9	0.5	0	0	0.904762	0.170732	0.22807	0.97619	0.384615	-0.0769231	-0.777778	-0.0357143	0.577465
										0.8	-0.0105263	-0.866667	0.166667	0.894737	-0.666667	0.333333	-0.16	-0.888889	0.833333	-0.359155	-0.2	-0.333333	-0.533157	0.526316	0.333333	0.72973	-0.333333	0.225	0.180328	-0.454545	-0.166667	0.6	0.428571	0.545455	-0.4	0.142857	-0.9	0.5	0	0	0.904762	0.190476	0.22807	0.97619	0.384615	-0.0769231	-0.777778	-0.0357143	0.577465
										0.8	-0.0105263	-0.866667	0.166667	0.894737	-0.666667	0.333333	-0.16	-0.888889	0.833333	-0.359155	-0.2	-0.333333	-0.533157	0.526316	0.333333	0.72973	-0.333333	0.225	0.193548	-0.454545	-0.166667	0.6	0.428571	0.545455	-0.4	0.142857	-0.9	0.5	0	0	0.904762	0.2	0.22807	0.97619	0.384615	-0.0769231	-0.777778	-0.0357143	0.577465
										0.8	-0.0105263	-0.866667	0.166667	0.894737	-0.666667	0.333333	-0.16	-0.89011	0.833333	-0.359155	-0.2	-0.333333	-0.533157	0.526316	0.333333	0.72973	-0.333333	0.225	0.193548	-0.454545	-0.166667	0.6	0.428571	0.545455	-0.4	0.142857	-0.9	0.5	0	0	0.904762	0.218391	0.22807	0.97619	0.384615	-0.0769231	-0.777778	-0.0357143	0.577465
										0.8	-0.0105263	-0.866667	0.166667	0.894737	-0.666667	0.333333	-0.16	-0.89011	0.833333	-0.359155	-0.2	-0.333333	-0.533157	0.526316	0.333333	0.72973	-0.333333	0.225	0.193548	-0.454545	-0.166667	0.6	0.428571	0.545455	-0.4	0.142857	-0.9	0.5	0	0	0.904762	0.235955	0.22807	0.97619	0.384615	-0.0769231	-0.777778	-0.0357143	0.577465
										0.8	-0.0105263	-0.866667	0.166667	0.894737	-0.666667	0.333333	-0.16	-0.89011	0.833333	-0.359155	-0.2	-0.333333	-0.533157	0.526316	0.333333	0.72973	-0.333333	0.225	0.193548	-0.454545	-0.166667	0.6	0.428571	0.545455	-0.4	0.142857	-0.9	0.5	0	0	0.904762	0.268817	0.22807	0.97619	0.384615	-0.0769231	-0.777778	-0.0357143	0.577465
										0.8	-0.0105263	-0.866667	0.166667	0.894737	-0.666667	0.333333	-0.16	-0.89011	0.833333	-0.359155	-0.2	-0.333333	-0.533157	0.526316	0.333333	0.72973	-0.333333	0.225	0.193548	-0.454545	-0.166667	0.6	0.428571	0.545455	-0.4	0.142857	-0.9	0.5	0	0	0.904762	0.268817	0.22807	0.97619	0.384615	-0.0769231	-0.777778	-0.0357143	0.577465
										0.8	-0.0105263	-0.866667	0.166667	0.894737	-0.666667	0.333333	-0.16	-0.89011	0.833333	-0.359155	-0.2	-0.333333	-0.533157	0.526316	0.333333	0.72973	-0.333333	0.225	0.193548	-0.454545	-0.166667	0.6	0.428571	0.545455	-0.4	0.142857	-0.9	0.5	0	0	0.904762	0.268817	0.22807	0.97619	0.384615	-0.0769231	-0.777778	-0.0357143	0.577465
										0.8	-0.0105263	-0.866667	0.166667	0.894737	-0.666667	0.333333	-0.16	-0.89011	0.833333	-0.359155	-0.2	-0.333333	-0.533157	0.526316	0.333333	0.72973	-0.333333	0.225	0.193548	-0.454545	-0.166667	0.6	0.428571	0.545455	-0.4	0.142857	-0.9	0.5	0	0	0.904762	0.268817	0.22807	0.97619	0.384615	-0.0769231	-0.777778	-0.0357143	0.577465
										0.8	-0.0105263	-0.866667	0.166667	0.894737	-0.666667	0.333333	-0.16	-0.89011	0.833333	-0.359155	-0.2	-0.333333	-0.533157	0.526316	0.333333	0.72973	-0.333333	0.225	0.193548	-0.454545	-0.166667	0.6	0.428571	0.545455	-0.4	0.142857	-0.9	0.5	0	0	0.904762	0.268817	0.22807	0.97619	0.384615	-0.0769231	-0.777778	-0.0357143	0.577465
										0.8	-0.0105263	-0.866667	0.166667	0.894737	-0.666667	0.333333	-0.16	-0.869565	0.833333	-0.359155	-0.2	-0.333333	-0.533157	0.526316	0.333333	0.72973	-0.333333	0.225	0.193548	-0.454545	-0.166667	0.6	0.428571	0.545455	-0.4	0.142857	-0.9	0.513513	0	0	0.904762	0.268817	0.22807	0.97619	0.384615	-0.0769231	-0.777778	-0.0357143	0.577465
										0.8	-0.0105263	-0.866667	0.166667	0.894737	-0.666667	0.333333	-0.16	-0.869565	0.833333	-0.359155	-0.2	-0.333333	-0.533157	0.526316	0.333333	0.72973	-0.333333	0.225	0.193548	-0.454545	-0.166667	0.6	0.428571	0.545455	-0.4	0.142857	-0.9	0.513513	0	0	0.904762	0.268817	0.22807	0.97619	0.384615	-0.0769231	-0.777778	-0.0357143	0.577465
										0.8	-0.0105263	-0.866667	0.166667	0.894737	-0.666667	0.333333	-0.16	-0.869565	0.833333	-0.359155	-0.2	-0.333333	-0.533157	0.526316	0.333333	0.72973	-0.333333	0.225	0.193548	-0.454545	-0.166667	0.6	0.212121	0.545455	-0.4	0.142857	-0.9	0.513513	0	0	0.904762	0.268817	0.22807	0.97619	0.384615	-0.0769231	-0.777778	-0.0357143	0.577465
										0.8	-0.0105263	-0.866667	0.166667	0.894737	-0.666667	0.333333	-0.16	-0.869565	0.833333	-0.359155	-0.2	-0.333333	-0.533157	0.526316	0.333333	0.72973	-0.333333	0.225	0.193548	-0.454545	-0.166667	0.6	0.176471	0.545455	-0.4	0.142857	-0.9	0.513513	0	0	0.904762	0.306123	0.22807	0.97619	0.384615	-0.0769231	-0.777778	-0.0357143	0.577465
										0.8	-0.0105263	-0.866667	0.166667	0.894737	-0.666667	0.333333	-0.16	-0.869565	0.833333	-0.359155	-0.2	-0.333333	-0.533157	0.526316	0.333333	0.72973	-0.333333	0.225	0.193548	-0.454545	-0.166667	0.6	0.176471	0.545455	-0.4	0.142857	-0.9	0.513513	0	0	0.904762	0.333333	0.22807	0.97619	0.384615	-0.0769231	-0.777778	-0.0357143	0.577465
										0.8	-0.0105263	-0.866667	0.166667	0.894737	-0.666667	0.333333	-0.16	-0.869565	0.833333	-0.359155	-0.2	-0.333333	-0.533157	0.526316	0.333333	0.72973	-0.333333	0.225	0.193548	-0.454545	-0.166667	0.6	0.142857	0.545455	-0.4	0.142857	-0.9	0.513513	0	0	0.904762	0.339806	0.22807	0.97619	0.384615	-0.0769231	-0.777778	-0.0357143	0.577465
										0.8	-0.0105263	-0.866667	0.166667	0.894737	-0.666667	0.333333	-0.16	-0.869565	0.833333	-0.359155	-0.2	-0.333333	-0.533157	0.526316	0.333333	0.72973	-0.333333	0.225	0.193548	-0.454545	-0.166667	0.6	0.142857	0.545455	-0.4	0.142857	-0.9	0.513513	0	0	0.904762	0.352381	0.22807	0.97619	0.384615	-0.0769231	-0.777778	-0.0357143	0.577465
										0.8	-0.0105263	-0.866667	0.166667	0.894737	-0.666667	0.333333	-0.16	-0.869565	0.846154	-0.359155	-0.2	-0.333333	-0.533157	0.526316	0.333333	0.72973	-0.333333	0.217391	0.193548	-0.454545	-0.166667	0.6	0.142857	0.545455	-0.4	0.142857	-0.9	0.513513	0	0	0.904762	0.376147	0.22807	0.97619	0.384615	-0.0769231	-0.777778	-0.0357143	0.577465
										0.8	-0.0105263	-0.866667	0.166667	0.894737	-0.666667	0.333333	-0.16	-0.869565	0.888889	-0.359155	-0.2	-0.333333	-0.533157	0.526316	0.333333	0.72973	-0.333333	0.202454	0.193548	-0.454545	-0.166667	0.6	0.142857	0.545455	-0.4	0.142857	-0.9	0.513513	0	0	0.904762	0.381818	0.22807	0.97619	0.384615	-0.0769231	-0.777778	-0.0357143	0.577465
										0.8	-0.0105263	-0.866667	0.166667	0.894737	-0.666667	0.333333	-0.16	-0.869565	0.909091	-0.359155	-0.2	-0.333333	-0.533157	0.526316	0.333333	0.72973	-0.333333	0.202454	0.253731	-0.454545	-0.166667	0.6	0.142857	0.545455	-0.4	0.142857	-0.9	0.513513	0	0	0.904762	0.392857	0.22807	0.97619	0.384615	-0.0769231	-0.777778	-0.0357143	0.577465
										0.8	-0.0105263	-0.866667	0.166667	0.894737	-0.666667	0.333333	-0.16	-0.869565	0.92	-0.359155	-0.2	-0.333333	-0.533157	0.526316	0.333333	0.72973	-0.333333	0.202454	0.285714	-0.454545	-0.166667	0.6	0.142857	0.545455	-0.4	0.142857	-0.9	0.513513	0	0	0.904762	0.403509	0.22807	0.97619	0.384615	-0.0769231	-0.777778	-0.0357143	0.577465
										0.8	-0.0105263	-0.866667	0.166667	0.894737	-0.666667	0.333333	-0.16	-0.869565	0.925926	-0.359155	-0.2	-0.333333	-0.533157	0.526316	0.333333	0.72973	-0.333333	0.202454	0.285714	-0.454545	-0.166667	0.6	0.142857	0.545455	-0.4	0.142857	-0.9	0.513513	0	0	0.904762	0.423729	0.22807	0.97619	0.384615	-0.0769231	-0.777778	-0.0357143	0.577465
										0.8	-0.0105263	-0.866667	0.166667	0.894737	-0.666667	0.333333	-0.16	-0.869565	0.925926	-0.359155	-0.2	-0.333333	-0.533157	0.526316	0.333333	0.72973	-0.333333	0.202454	0.285714	-0.454545	-0.166667	0.6	0.142857	0.545455	-0.4	0.142857	-0.809524	0.513513	0	0	0.904762	0.423729	0.22807	0.97619	0.384615	-0.0769231	-0.777778	-0.0357143	0.577465
										0.8	-0.0105263	-0.866667	0.166667	0.894737	-0.666667	0.333333	-0.16	-0.869565	0.928571	-0.359155	-0.2	-0.333333	-0.533157	0.526316	0.333333	0.72973	-0.333333	0.202454	0.285714	-0.454545	-0.166667	0.6	0.142857	0.545455	-0.4	0.142857	-0.809524	0.513513	0	0	0.904762	0.428571	0.22807	0.97619	0.384615	-0.0769231	-0.777778	-0.0357143	0.577465
										0.8	-0.0105263	-0.866667	0.166667	0.894737	-0.666667	0.333333	-0.16	-0.869565	0.931034	-0.359155	-0.2	-0.333333	-0.533157	0.526316	0.333333	0.72973	-0.333333	0.202454	0.285714	-0.454545	-0.166667	0.6	0.142857	0.545455	-0.454545	0.142857	-0.809524	0.513513	0	0	0.904762	0.438016	0.22807	0.97619	0.384615	-0.0769231	-0.777778	-0.0357143	0.577465
										0.8	-0.0105263	-0.866667	0.166667	0.894737	-0.666667	0.333333	-0.16	-0.869565	0.933333	-0.359155	-0.2	-0.333333	-0.533157	0.526316	0.333333	0.72973	-0.333333	0.202454	0.285714	-0.454545	-0.166667	0.6	0.142857	0.545455	-0.454545	0.142857	-0.809524	0.513513	0	0	0.904762	0.447155	0.22807	0.97619	0.384615	-0.0769231	-0.777778	-0.0357143	0.577465
										0.8	-0.0105263	-0.866667	0.166667	0.894737	-0.666667	0.333333	-0.16	-0.869565	0.935484	-0.359155	-0.2	-0.333333	-0.533157	0.526316	0.333333	0.72973	-0.333333	0.202454	0.285714	-0.454545	-0.166667	0.6	0.142857	0.545455	-0.454545	0.142857	-0.809524	0.581395	0	0	0.904762	0.451613	0.22807	0.97619	0.384615	-0.0769231	-0.777778	-0.0357143	0.577465
										0.8	-0.0105263	-0.866667	0.166667	0.894737	-0.666667	0.333333	-0.16	-0.869565	0.9375	-0.359155	-0.2	-0.333333	-0.533157	0.526316	0.333333	0.72973	-0.333333	0.202454	0.285714	-0.454545	-0.166667	0.6	0.142857	0.545455	-0.454545	0.142857	-0.809524	0.625	0	0	0.904762	0.451613	0.22807	0.97619	0.384615	-0.0769231	-0.777778	-0.0357143	0.577465
										0.8	-0.0105263	-0.866667	0.166667	0.894737	-0.666667	0.333333	-0.16	-0.869565	0.939394	-0.359155	-0.2	-0.333333	-0.533157	0.526316	0.333333	0.72973	-0.333333	0.202454	0.285714	-0.454545	-0.166667	0.6	0.142857	0.545455	-0.454545	0.142857	-0.809524	0.625	0	0	0.904762	0.472868	0.22807	0.97619	0.384615	-0.0769231	-0.777778	-0.0357143	0.577465
										0.8	-0.0105263	-0.866667	0.166667	0.894737	-0.666667	0.333333	-0.16	-0.869565	0.941176	-0.359155	-0.2	-0.333333	-0.533157	0.526316	0.333333	0.72973	-0.333333	0.202454	0.285714	-0.454545	-0.166667	0.6	0.142857	0.545455	-0.454545	0.142857	-0.809524	0.625	0	0	0.904762	0.496296	0.22807	0.97619	0.384615	-0.0769231	-0.777778	-0.0357143	0.577465
										0.8	-0.0105263	-0.866667	0.166667	0.894737	-0.666667	0.333333	-0.16	-0.869565	0.944444	-0.359155	-0.2	-0.333333	-0.533157	0.526316	0.333333	0.72973	-0.333333	0.202454	0.285714	-0.454545	-0.166667	0.6	0.142857	0.545455	-0.454545	0.142857	-0.809524	0.625	0	0	0.904762	0.5	0.22807	0.97619	0.384615	-0.0769231	-0.777778	-0.0357143	0.577465
										0.8	-0.0105263	-0.866667	0.166667	0.894737	-0.666667	0.333333	-0.16	-0.869565	0.948718	-0.359155	-0.2	-0.333333	-0.533157	0.526316	0.333333	0.72973	-0.333333	0.202454	0.285714	-0.454545	-0.166667	0.6	0.142857	0.545455	-0.454545	0.142857	-0.809524	0.625	0	0	0.904762	0.5	0.22807	0.97619	0.384615	-0.0769231	-0.777778	-0.0357143	0.577465
										0.8	-0.0105263	-0.866667	0.166667	0.894737	-0.666667	0.333333	-0.16	-0.869565	0.953488	-0.354386	-0.2	-0.333333	-0.533157	0.526316	0.333333	0.72973	-0.333333	0.202454	0.285714	-0.454545	-0.166667	0.6	0.142857	0.545455	-0.454545	0.142857	-0.809524	0.625	0	0	0.904762	0.5	0.22807	0.97619	0.384615	-0.0769231	-0.777778	-0.0357143	0.577465
										0.8	-0.0105263	-0.866667	0.166667	0.894737	-0.666667	0.333333	-0.16	-0.869565	0.954545	-0.354386	-0.2	-0.333333	-0.533157	0.526316	0.333333	0.72973	-0.333333	0.202454	0.285714	-0.454545	-0.166667	0.6	0.142857	0.545455	-0.454545	0.142857	-0.809524	0.625	0	0	0.904762	0.5	0.22807	0.97619	0.384615	-0.111111	-0.777778	-0.0357143	0.577465
										0.8	-0.0105263	-0.866667	0.166667	0.894737	-0.666667	0.333333	-0.16	-0.869565	0.957447	-0.354386	-0.2	-0.333333	-0.533157	0.526316	0.333333	0.72973	-0.333333	0.202454	0.285714	-0.454545	-0.166667	0.6	0.142857	0.545455	-0.454545	0.142857	-0.809524	0.625	0	0	0.904762	0.5	0.22807	0.97619	0.384615	-0.111111	-0.777778	-0.0357143	0.577465
										0.8	-0.0105263	-0.866667	0.166667	0.894737	-0.666667	0.333333	-0.16	-0.869565	0.958333	-0.354386	-0.2	-0.333333	-0.533157	0.526316	0.333333	0.72973	-0.333333	0.202454	0.285714	-0.454545	-0.166667	0.6	0.142857	0.545455	-0.454545	0.142857	-0.809524	0.625	0	0	0.904762	0.5	0.22807	0.97619	0.384615	-0.111111	-0.777778	-0.0357143	0.577465
										0.8	-0.0105263	-0.866667	0.166667	0.894737	-0.666667	0.333333	-0.16	-0.869565	0.958333	-0.34965	-0.2	-0.333333	-0.533157	0.526316	0.333333	0.72973	-0.333333	0.202454	0.285714	-0.454545	-0.166667	0.6	0.142857	0.545455	-0.454545	0.142857	-0.809524	0.625	0	0	0.904762	0.5	0.22807	0.97619	0.384615	-0.111111	-0.777778	-0.0357143	0.577465
										0.8	-0.0105263	-0.866667	0.166667	0.894737	-0.666667	0.333333	-0.16	-0.869565	0.958333	-0.34965	-0.2	-0.333333	-0.533157	0.526316	0.333333	0.72973	-0.333333	0.202454	0.285714	-0.454545	-0.166667	0.6	0.142857	0.545455	-0.454545	0.142857	-0.809524	0.625	0	0	0.904762	0.5	0.22807	0.97619	0.384615	-0.111111	-0.777778	-0.0357143	0.577465
										0.8	-0.0105263	-0.866667	0.166667	0.894737	-0.666667	0.333333	-0.16	-0.869565	0.958333	-0.34965	-0.2	-0.333333	-0.533157	0.526316	0.333333	0.72973	-0.333333	0.202454	0.285714	-0.454545	-0.166667	0.6	0.142857	0.545455	-0.454545	0.142857	-0.809524	0.625	0	0	0.904762	0.5	0.22807	0.97619	0.384615	-0.111111	-0.777778	-0.0357143	0.577465
										0.8	-0.0105263	-0.866667	0.166667	0.894737	-0.666667	0.333333	-0.16	-0.869565	0.958333	-0.34965	-0.2	-0.333333	-0.533157	0.526316	0.333333	0.72973	-0.333333	0.202454	0.285714	-0.454545	-0.166667	0.6	0.142857	0.545455	-0.454545	0.142857	-0.809524	0.625	0	0	0.904762	0.5	0.22807	0.97619	0.384615	-0.111111	-0.8	-0.0357143	0.577465
										0.8	-0.0105263	-0.866667	0.166667	0.894737	-0.666667	0.333333	-0.16	-0.869565	0.958333	-0.34965	-0.2	-0.333333	-0.533157	0.526316	0.333333	0.72973	-0.333333	0.202454	0.285714	-0.454545	-0.166667	0.6	0.142857	0.545455	-0.454545	0.142857	-0.809524	0.625	0	0	0.904762	0.5	0.22807	0.97619	0.384615	-0.111111	-0.8	-0.0357143	0.577465
										0.8	-0.0105263	-0.866667	0.166667	0.894737	-0.666667	0.333333	-0.16	-0.869565	0.958333	-0.34965	-0.2	-0.333333	-0.533157	0.526316	0.333333	0.72973	-0.333333	0.202454	0.285714	-0.454545	-0.166667	0.6	0.142857	0.545455	-0.454545	0.142857	-0.809524	0.625	0	0	0.904762	0.5	0.22807	0.97619	0.384615	-0.111111	-0.8	-0.0357143	0.577465
										0.8	-0.0105263	-0.866667	0.166667	0.894737	-0.666667	0.333333	-0.16	-0.869565	0.958333	-0.34965	-0.2	-0.333333	-0.533157	0.526316	0.333333	0.72973	-0.333333	0.202454	0.285714	-0.454545	-0.166667	0.6	0.142857	0.545455	-0.454545	0.142857	-0.809524	0.625	0	0	0.904762	0.5	0.22807	0.97619	0.384615	-0.111111	-0.8	-0.0357143	0.577465
										0.8	-0.0105263	-0.866667	0.166667	0.894737	-0.666667	0.333333	-0.16	-0.869565	0.958333	-0.34965	-0.2	-0.333333	-0.533157	0.526316	0.333333	0.72973	-0.333333	0.202454	0.305556	-0.454545	-0.166667	0.6	0.142857	0.545455	-0.454545	0.142857	-0.809524	0.625	0	0	0.904762	0.5	0.22807	0.97619	0.384615	-0.111111	-0.818182	-0.0357143	0.577465
										0.8	-0.0105263	-0.866667	0.166667	0.894737	-0.666667	0.333333	-0.16	-0.869565	0.958333	-0.34965	-0.2	-0.333333	-0.533157	0.526316	0.333333	0.72973	-0.333333	0.180723	0.358974	-0.454545	-0.166667	0.6	0.142857	0.545455	-0.454545	0.142857	-0.809524	0.625	0	0	0.904762	0.5	0.22807	0.97619	0.384615	-0.111111	-0.818182	-0.0357143	0.577465
										0.8	-0.0105263	-0.866667	0.166667	0.894737	-0.666667	0.333333	-0.16	-0.869565	0.958333	-0.34965	-0.2	-0.333333	-0.533157	0.526316	0.333333	0.72973	-0.333333	0.166667	0.358974	-0.454545	-0.166667	0.6	0.142857	0.545455	-0.454545	0.142857	-0.809524	0.625	0	0	0.904762	0.5	0.22807	0.97619	0.384615	-0.111111	-0.818182	-0.0357143	0.577465
										0.8	-0.0105263	-0.866667	0.166667	0.894737	-0.666667	0.333333	-0.16	-0.869565	0.958333	-0.34965	-0.2	-0.333333	-0.533157	0.526316	0.333333	0.72973	-0.333333	0.166667	0.358974	-0.454545	-0.166667	0.6	0.142857	0.545455	-0.454545	0.142857	-0.809524	0.625	0	0	0.904762	0.5	0.22807	0.97619	0.384615	-0.111111	-0.818182	-0.0357143	0.577465
										0.8	-0.0105263	-0.866667	0.166667	0.894737	-0.666667	0.333333	-0.16	-0.869565	0.958333	-0.34965	-0.2	-0.333333	-0.533157	0.526316	0.333333	0.72973	-0.333333	0.166667	0.358974	-0.454545	-0.166667	0.6	0.142857	0.545455	-0.454545	0.142857	-0.809524	0.625	0	0	0.904762	0.5	0.22807	0.97619	0.384615	-0.111111	-0.818182	-0.0357143	0.577465
										0.8	-0.0105263	-0.866667	0.166667	0.894737	-0.666667	0.333333	-0.16	-0.869565	0.958333	-0.34965	-0.2	-0.333333	-0.533157	0.526316	0.333333	0.72973	-0.333333	0.166667	0.358974	-0.454545	-0.166667	0.6	0.142857	0.545455	-0.454545	0.142857	-0.809524	0.625	0	0	0.904762	0.5	0.22807	0.97619	0.384615	-0.111111	-0.818182	-0.0357143	0.577465
										0.8	-0.0105263	-0.866667	0.166667	0.894737	-0.666667	0.333333	-0.16	-0.869565	0.958333	-0.34965	-0.2	-0.333333	-0.533157	0.526316	0.333333	0.72973	-0.333333	0.166667	0.358974	-0.454545	-0.166667	0.6	0.142857	0.545455	-0.454545	0.142857	-0.809524	0.625	0	0	0.904762	0.5	0.22807	0.97619	0.384615	-0.111111	-0.818182	-0.0357143	0.577465
										0.8	-0.0105263	-0.866667	0.166667	0.894737	-0.666667	0.333333	-0.16	-0.869565	0.958333	-0.34965	-0.2	-0.333333	-0.533157	0.526316	0.333333	0.72973	-0.333333	0.166667	0.358974	-0.454545	-0.166667	0.6	0.142857	0.545455	-0.454545	0.142857	-0.809524	0.625	0	0	0.904762	0.5	0.22807	0.97619	0.384615	-0.111111	-0.818182	-0.0357143	0.577465
										0.8	-0.0105263	-0.866667	0.166667	0.894737	-0.666667	0.333333	-0.16	-0.869565	0.958333	-0.34965	-0.2	-0.333333	-0.533157	0.526316	0.333333	0.72973	-0.333333	0.166667	0.358974	-0.454545	-0.166667	0.6	0.142857	0.545455	-0.454545	0.142857	-0.809524	0.625	0	0	0.904762	0.5	0.22807	0.97619	0.384615	-0.111111	-0.818182	-0.0357143	0.577465
										0.8	-0.0105263	-0.866667	0.166667	0.894737	-0.666667	0.333333	-0.16	-0.869565	0.958333	-0.34965	-0.2	-0.333333	-0.533157	0.526316	0.333333	0.72973	-0.333333	0.166667	0.358974	-0.454545	-0.166667	0.6	0.142857	0.545455	-0.454545	0.142857	-0.809524	0.625	0	0	0.904762	0.5	0.22807	0.97619	0.384615	-0.111111	-0.818182	-0.0357143	0.577465
										0.8	-0.0105263	-0.866667	0.166667	0.894737	-0.666667	0.333333	-0.16	-0.869565	0.958333	-0.34965	-0.2	-0.333333	-0.533157	0.526316	0.333333	0.72973	-0.333333	0.166667	0.358974	-0.454545	-0.166667	0.6	0.142857	0.545455	-0.5	0.142857	-0.809524	0.625	0	0	0.904762	0.5	0.22807	0.97619	0.384615	-0.111111	-0.818182	-0.0357143	0.577465
										0.8	-0.0105263	-0.866667	0.166667	0.894737	-0.666667	0.333333	-0.16	-0.869565	0.958333	-0.34965	-0.2	-0.333333	-0.533157	0.526316	0.333333	0.72973	-0.333333	0.166667	0.358974	-0.454545	-0.166667	0.6	0.142857	0.545455	-0.647059	0.142857	-0.809524	0.625	0	0	0.904762	0.5	0.22807	0.97619	0.384615	-0.111111	-0.818182	-0.0357143	0.577465
										0.8	-0.0105263	-0.866667	0.166667	0.894737	-0.666667	0.333333	-0.16	-0.869565	0.958333	-0.34965	-0.2	-0.333333	-0.533157	0.526316	0.333333	0.72973	-0.333333	0.166667	0.358974	-0.454545	-0.166667	0.6	0.142857	0.545455	-0.647059	0.142857	-0.809524	0.625	0	0	0.904762	0.5	0.22807	0.97619	0.384615	-0.111111	-0.818182	-0.0357143	0.577465
										0.8	-0.0105263	-0.866667	0.166667	0.894737	-0.666667	0.333333	-0.16	-0.869565	0.958333	-0.34965	-0.2	-0.333333	-0.533157	0.526316	0.333333	0.72973	-0.333333	0.166667	0.358974	-0.454545	-0.166667	0.6	0.142857	0.545455	-0.647059	0.142857	-0.809524	0.625	0	0	0.904762	0.5	0.22807	0.97619	0.384615	-0.111111	-0.818182	-0.0357143	0.577465
										0.8	-0.0105263	-0.866667	0.166667	0.894737	-0.666667	0.333333	-0.16	-0.869565	0.958333	-0.34965	-0.2	-0.333333	-0.533157	0.526316	0.333333	0.72973	-0.333333	0.166667	0.358974	-0.454545	-0.166667	0.6	0.142857	0.545455	-0.647059	0.142857	-0.809524	0.625	0	0	0.904762	0.5	0.22807	0.97619	0.384615	-0.142857	-0.818182	-0.0357143	0.577465
										0.8	-0.0105263	-0.866667	0.166667	0.894737	-0.666667	0.333333	-0.16	-0.870968	0.958333	-0.34965	-0.2	-0.333333	-0.533157	0.526316	0.333333	0.72973	-0.333333	0.166667	0.358974	-0.454545	-0.166667	0.6	0.142857	0.545455	-0.647059	0.142857	-0.809524	0.625	0	0	0.904762	0.5	0.22807	0.97619	0.384615	-0.142857	-0.818182	-0.0357143	0.577465
										0.8	-0.0105263	-0.866667	0.166667	0.894737	-0.666667	0.333333	-0.16	-0.870968	0.958333	-0.34965	-0.2	-0.333333	-0.533157	0.526316	0.333333	0.72973	-0.333333	0.166667	0.358974	-0.454545	-0.166667	0.6	0.142857	0.545455	-0.647059	0.142857	-0.809524	0.625	0	0	0.904762	0.5	0.22807	0.97619	0.384615	-0.142857	-0.818182	-0.0357143	0.577465
										0.8	-0.0105263	-0.866667	0.166667	0.894737	-0.666667	0.333333	-0.16	-0.870968	0.958333	-0.34965	-0.2	-0.333333	-0.533157	0.526316	0.333333	0.72973	-0.333333	0.166667	0.358974	-0.454545	-0.166667	0.6	0.142857	0.545455	-0.647059	0.142857	-0.809524	0.625	0	0	0.904762	0.5	0.22807	0.97619	0.384615	-0.142857	-0.818182	-0.0357143	0.577465
										0.8	-0.0105263	-0.866667	0.166667	0.894737	-0.666667	0.333333	-0.16	-0.870968	0.958333	-0.34965	-0.2	-0.333333	-0.533157	0.526316	0.333333	0.72973	-0.333333	0.166667	0.358974	-0.454545	-0.166667	0.6	0.142857	0.545455	-0.647059	0.142857	-0.809524	0.625	0	0	0.904762	0.5	0.22807	0.97619	0.384615	-0.142857	-0.818182	-0.0357143	0.577465
										0.8	-0.0105263	-0.866667	0.166667	0.894737	-0.666667	0.333333	-0.16	-0.870968	0.958333	-0.34965	-0.2	-0.333333	-0.533157	0.526316	0.333333	0.72973	-0.333333	0.166667	0.358974	-0.454545	-0.166667	0.6	0.142857	0.545455	-0.647059	0.142857	-0.809524	0.625	0	0	0.904762	0.5	0.22807	0.97619	0.384615	-0.142857	-0.818182	-0.0357143	0.577465
										0.8	-0.0105263	-0.866667	0.166667	0.894737	-0.666667	0.333333	-0.16	-0.870968	0.958333	-0.34965	-0.2	-0.333333	-0.533157	0.526316	0.333333	0.72973	-0.333333	0.166667	0.358974	-0.454545	-0.166667	0.6	0.142857	0.545455	-0.647059	0.142857	-0.809524	0.625	0	0	0.904762	0.5	0.22807	0.97619	0.384615	-0.142857	-0.818182	-0.0357143	0.577465
										0.8	-0.0105263	-0.866667	0.166667	0.894737	-0.666667	0.333333	-0.16	-0.870968	0.958333	-0.34965	-0.2	-0.333333	-0.533157	0.526316	0.333333	0.72973	-0.333333	0.166667	0.358974	-0.454545	-0.166667	0.6	0.142857	0.545455	-0.647059	0.142857	-0.809524	0.625	0	0	0.904762	0.5	0.22807	0.97619	0.384615	-0.142857	-0.818182	-0.0357143	0.577465
										0.8	-0.0105263	-0.866667	0.166667	0.894737	-0.666667	0.333333	-0.16	-0.870968	0.958333	-0.34965	-0.2	-0.333333	-0.533157	0.526316	0.333333	0.72973	-0.333333	0.166667	0.358974	-0.454545	-0.166667	0.6	0.142857	0.545455	-0.647059	0.142857	-0.809524	0.625	0	0	0.904762	0.5	0.22807	0.97619	0.384615	-0.142857	-0.818182	-0.0357143	0.577465
										0.8	-0.0105263	-0.866667	0.166667	0.894737	-0.666667	0.333333	-0.16	-0.870968	0.958333	-0.34965	-0.2	-0.333333	-0.533157	0.526316	0.333333	0.72973	-0.333333	0.166667	0.358974	-0.454545	-0.166667	0.6	0.142857	0.545455	-0.647059	0.142857	-0.809524	0.625	0	0	0.904762	0.467626	0.22807	0.97619	0.384615	-0.142857	-0.818182	-0.0357143	0.577465
										0.8	-0.0105263	-0.866667	0.166667	0.894737	-0.666667	0.333333	-0.16	-0.870968	0.958333	-0.34965	-0.2	-0.333333	-0.533157	0.526316	0.333333	0.72973	-0.2	0.166667	0.358974	-0.454545	-0.166667	0.6	0.142857	0.545455	-0.647059	0.142857	-0.809524	0.625	0	0	0.904762	0.43662	0.22807	0.97619	0.384615	-0.142857	-0.818182	-0.0357143	0.577465
										0.8	-0.0105263	-0.866667	0.166667	0.894737	-0.666667	0.333333	-0.16	-0.870968	0.958333	-0.351916	-0.2	-0.333333	-0.533157	0.526316	0.333333	0.72973	0.2	0.166667	0.358974	-0.454545	-0.166667	0.6	0.142857	0.545455	-0.647059	0.142857	-0.809524	0.625	0	0	0.904762	0.43662	0.22807	0.97619	0.384615	-0.142857	-0.818182	-0.0357143	0.577465
										0.8	-0.0105263	-0.866667	0.166667	0.894737	-0.666667	0.333333	-0.16	-0.870968	0.958333	-0.351916	-0.2	-0.333333	-0.533157	0.526316	0.333333	0.72973	0.25	0.166667	0.358974	-0.454545	-0.166667	0.6	0.142857	0.545455	-0.647059	0.142857	-0.809524	0.625	0	0	0.904762	0.43662	0.22807	0.97619	0.384615	-0.142857	-0.818182	-0.0357143	0.577465
										0.8	-0.0105263	-0.866667	0.166667	0.894737	-0.666667	0.333333	-0.16	-0.870968	0.958333	-0.351916	-0.2	-0.333333	-0.533157	0.526316	0.333333	0.72973	0.368421	0.166667	0.358974	-0.454545	-0.166667	0.6	0.142857	0.545455	-0.647059	0.142857	-0.809524	0.625	0	0	0.904762	0.43662	0.22807	0.97619	0.384615	-0.142857	-0.818182	-0.0357143	0.577465
										0.8	-0.0105263	-0.866667	0.166667	0.894737	-0.666667	0.333333	-0.16	-0.870968	0.773585	-0.351916	-0.2	-0.333333	-0.533157	0.526316	0.333333	0.72973	0.428571	0.166667	0.358974	-0.454545	-0.166667	0.612903	0.142857	0.545455	-0.647059	0.142857	-0.809524	0.625	0	0	0.904762	0.43662	0.22807	0.97619	0.384615	-0.142857	-0.818182	-0.0357143	0.577465
										0.8	-0.0105263	-0.866667	0.166667	0.894737	-0.666667	0.333333	-0.16	-0.870968	0.773585	-0.351916	-0.2	-0.333333	-0.533157	0.526316	0.333333	0.72973	0.5	0.166667	0.358974	-0.454545	-0.166667	0.612903	0.142857	0.545455	-0.647059	0.142857	-0.809524	0.625	0	0	0.904762	0.43662	0.22807	0.97619	0.384615	-0.142857	-0.818182	-0.0357143	0.577465
										0.8	-0.0105263	-0.866667	0.166667	0.894737	-0.666667	0.333333	-0.16	-0.870968	0.773585	-0.351916	-0.2	-0.333333	-0.533157	0.526316	0.333333	0.72973	0.52	0.166667	0.358974	-0.454545	-0.166667	0.612903	0.142857	0.545455	-0.647059	0.142857	-0.809524	0.625	0	0	0.904762	0.43662	0.22807	0.97619	0.384615	-0.142857	-0.818182	-0.0357143	0.577465
										0.8	-0.0105263	-0.866667	0.166667	0.894737	-0.666667	0.333333	-0.16	-0.870968	0.773585	-0.351916	-0.2	-0.333333	-0.533157	0.526316	0.333333	0.72973	0.538462	0.166667	0.358974	-0.454545	-0.166667	0.612903	0.142857	0.545455	-0.647059	0.142857	-0.809524	0.625	0	0	0.904762	0.43662	0.22807	0.97619	0.384615	-0.172414	-0.818182	-0.0357143	0.577465
										0.8	-0.0105263	-0.866667	0.166667	0.894737	-0.666667	0.333333	-0.16	-0.870968	0.773585	-0.351916	-0.2	-0.333333	-0.533157	0.526316	0.333333	0.72973	0.555556	0.166667	0.358974	-0.454545	-0.166667	0.636364	0.142857	0.545455	-0.647059	0.142857	-0.809524	0.625	0	0	0.904762	0.43662	0.22807	0.97619	0.384615	-0.172414	-0.818182	-0.0357143	0.577465
										0.8	-0.0105263	-0.866667	0.166667	0.894737	-0.666667	0.333333	-0.16	-0.870968	0.773585	-0.351916	-0.2	-0.333333	-0.533157	0.526316	0.333333	0.72973	0.571429	0.166667	0.358974	-0.454545	-0.166667	0.647059	0.142857	0.545455	-0.647059	0.142857	-0.809524	0.625	0	0	0.904762	0.43662	0.22807	0.97619	0.384615	-0.172414	-0.818182	-0.0357143	0.577465
										0.8	-0.0105263	-0.866667	0.166667	0.894737	-0.666667	0.333333	-0.16	-0.870968	0.773585	-0.351916	-0.2	-0.333333	-0.533157	0.506494	0.333333	0.72973	0.571429	0.166667	0.358974	-0.454545	-0.166667	0.647059	0.142857	0.545455	-0.647059	0.217391	-0.809524	0.625	0	0	0.904762	0.43662	0.22807	0.97619	0.384615	-0.172414	-0.818182	-0.0357143	0.577465
										0.8	-0.0105263	-0.866667	0.166667	0.894737	-0.666667	0.333333	-0.16	-0.870968	0.773585	-0.351916	-0.2	-0.333333	-0.533157	0.506494	0.333333	0.72973	0.571429	0.171598	0.358974	-0.454545	-0.166667	0.647059	0.142857	0.545455	-0.647059	0.357143	-0.809524	0.625	0	0	0.904762	0.43662	0.22807	0.97619	0.384615	-0.172414	-0.818182	-0.0357143	0.577465
										0.8	-0.0105263	-0.866667	0.166667	0.894737	-0.666667	0.333333	-0.16	-0.870968	0.773585	-0.351916	-0.2	-0.333333	-0.533157	0.506494	0.333333	0.72973	0.586207	0.171598	0.358974	-0.454545	-0.166667	0.647059	0.142857	0.545455	-0.647059	0.357143	-0.809524	0.625	0	0	0.904762	0.43662	0.22807	0.97619	0.384615	-0.172414	-0.818182	-0.0357143	0.577465
										0.8	-0.0105263	-0.866667	0.166667	0.894737	-0.666667	0.333333	-0.16	-0.870968	0.773585	-0.351916	-0.2	-0.333333	-0.533157	0.506494	0.333333	0.72973	0.586207	0.171598	0.358974	-0.454545	-0.166667	0.647059	0.142857	0.545455	-0.647059	0.357143	-0.809524	0.625	0	0	0.904762	0.43662	0.22807	0.97619	0.384615	-0.172414	-0.818182	-0.0357143	0.577465
										0.8	-0.0105263	-0.866667	0.166667	0.894737	-0.666667	0.333333	-0.16	-0.870968	0.773585	-0.351916	-0.2	-0.333333	-0.533157	0.506494	0.333333	0.72973	0.6	0.171598	0.358974	-0.454545	-0.166667	0.647059	0.142857	0.545455	-0.647059	0.357143	-0.809524	0.625	0	0	0.904762	0.43662	0.22807	0.97619	0.384615	-0.172414	-0.818182	-0.0357143	0.577465
										0.8	-0.0105263	-0.866667	0.166667	0.894737	-0.666667	0.333333	-0.16	-0.870968	0.773585	-0.351916	-0.2	-0.333333	-0.533157	0.506494	0.333333	0.72973	0.612903	0.171598	0.358974	-0.454545	-0.166667	0.647059	0.142857	0.545455	-0.647059	0.357143	-0.809524	0.625	0	0	0.904762	0.43662	0.22807	0.97619	0.384615	-0.172414	-0.818182	-0.0357143	0.577465
										0.8	-0.0105263	-0.866667	0.166667	0.894737	-0.666667	0.333333	-0.16	-0.870968	0.773585	-0.351916	-0.2	-0.333333	-0.533157	0.506494	0.333333	0.72973	0.625	0.171598	0.358974	-0.454545	-0.166667	0.647059	0.142857	0.545455	-0.647059	0.357143	-0.809524	0.625	0	0	0.904762	0.43662	0.22807	0.97619	0.384615	-0.172414	-0.818182	-0.0357143	0.577465
										0.8	-0.0105263	-0.866667	0.166667	0.894737	-0.666667	0.333333	-0.16	-0.870968	0.773585	-0.351916	-0.2	-0.333333	-0.533157	0.506494	0.333333	0.72973	0.647059	0.171598	0.358974	-0.454545	-0.166667	0.647059	0.142857	0.545455	-0.647059	0.357143	-0.809524	0.625	0	0	0.904762	0.43662	0.22807	0.97619	0.384615	-0.172414	-0.818182	-0.0357143	0.577465
										0.8	-0.0105263	-0.866667	0.166667	0.894737	-0.666667	0.333333	-0.16	-0.870968	0.773585	-0.351916	-0.2	-0.333333	-0.533157	0.506494	0.333333	0.72973	0.647059	0.171598	0.358974	-0.454545	-0.166667	0.647059	0.142857	0.545455	-0.647059	0.357143	-0.809524	0.625	0	0	0.904762	0.43662	0.22807	0.97619	0.384615	-0.172414	-0.818182	-0.0357143	0.577465
										0.8	-0.0105263	-0.866667	0.166667	0.894737	-0.666667	0.333333	-0.16	-0.870968	0.773585	-0.351916	-0.2	-0.333333	-0.533157	0.506494	0.333333	0.72973	0.647059	0.171598	0.358974	-0.454545	-0.166667	0.647059	0.142857	0.545455	-0.647059	0.357143	-0.809524	0.625	0	0	0.904762	0.43662	0.22807	0.97619	0.384615	-0.172414	-0.818182	-0.0357143	0.577465
										0.8	-0.0105263	-0.866667	0.166667	0.894737	-0.666667	0.333333	-0.16	-0.870968	0.773585	-0.351916	-0.2	-0.333333	-0.533157	0.506494	0.333333	0.72973	0.657143	0.171598	0.358974	-0.454545	-0.166667	0.647059	0.142857	0.545455	-0.647059	0.357143	-0.809524	0.625	0	0	0.904762	0.43662	0.22807	0.97619	0.384615	-0.172414	-0.818182	-0.0357143	0.577465
										0.8	-0.0105263	-0.866667	0.166667	0.894737	-0.666667	0.333333	-0.16	-0.870968	0.773585	-0.351916	-0.2	-0.333333	-0.533157	0.506494	0.333333	0.72973	0.657143	0.171598	0.358974	-0.454545	-0.166667	0.647059	0.142857	0.545455	-0.647059	0.357143	-0.809524	0.625	0	0	0.904762	0.43662	0.22807	0.97619	0.384615	-0.172414	-0.818182	-0.0357143	0.577465
										0.8	-0.0105263	-0.866667	0.166667	0.894737	-0.666667	0.333333	-0.16	-0.870968	0.773585	-0.351916	-0.2	-0.333333	-0.533157	0.506494	0.333333	0.72973	0.657143	0.171598	0.358974	-0.454545	-0.166667	0.647059	0.142857	0.545455	-0.647059	0.357143	-0.809524	0.625	0	0	0.904762	0.43662	0.22807	0.97619	0.384615	-0.172414	-0.818182	-0.0357143	0.577465
										0.8	-0.0105263	-0.866667	0.166667	0.894737	-0.666667	0.333333	-0.16	-0.870968	0.773585	-0.351916	-0.2	-0.333333	-0.533157	0.506494	0.333333	0.72973	0.657143	0.171598	0.358974	-0.454545	-0.166667	0.647059	0.142857	0.545455	-0.647059	0.117647	-0.809524	0.625	0	0	0.904762	0.43662	0.22807	0.97619	0.384615	-0.172414	-0.818182	-0.0357143	0.577465
										0.8	-0.0105263	-0.866667	0.166667	0.894737	-0.666667	0.333333	-0.16	-0.870968	0.773585	-0.337931	-0.2	-0.333333	-0.533157	0.506494	0.333333	0.72973	0.657143	0.171598	0.358974	-0.454545	-0.166667	0.647059	0.142857	0.545455	-0.647059	0.0555556	-0.809524	0.625	0	0	0.904762	0.43662	0.22807	0.97619	0.384615	-0.172414	-0.818182	-0.0357143	0.577465
										0.8	-0.0105263	-0.866667	0.166667	0.894737	-0.666667	0.333333	-0.16	-0.870968	0.773585	-0.319728	-0.2	-0.333333	-0.533157	0.506494	0.333333	0.72973	0.657143	0.171598	0.358974	-0.454545	-0.166667	0.647059	0.142857	0.545455	-0.647059	0.0555556	-0.809524	0.625	0	0	0.904762	0.43662	0.22807	0.97619	0.384615	-0.172414	-0.818182	-0.0357143	0.577465
										0.8	-0.0105263	-0.866667	0.166667	0.894737	-0.666667	0.333333	-0.16	-0.870968	0.773585	-0.291391	-0.2	-0.333333	-0.533157	0.506494	0.333333	0.72973	0.657143	0.171598	0.358974	-0.454545	-0.166667	0.365854	0.142857	0.545455	-0.647059	0.0555556	-0.809524	0.625	0	0	0.904762	0.43662	0.22807	0.97619	0.384615	-0.172414	-0.818182	-0.0357143	0.577465
										0.8	-0.0105263	-0.866667	0.166667	0.894737	-0.666667	0.333333	-0.16	-0.870968	0.773585	-0.258064	-0.2	-0.333333	-0.533157	0.506494	0.333333	0.72973	0.657143	0.171598	0.358974	-0.454545	-0.166667	0.333333	0.142857	0.545455	-0.647059	0.0555556	-0.809524	0.625	0	0	0.904762	0.43662	0.22807	0.97619	0.384615	-0.172414	-0.818182	-0.0357143	0.577465
										0.8	-0.0105263	-0.866667	0.166667	0.894737	-0.666667	0.333333	-0.16	-0.870968	0.773585	-0.238095	-0.2	-0.333333	-0.533157	0.506494	0.333333	0.72973	0.657143	0.171598	0.358974	-0.454545	-0.166667	0.302326	0.142857	0.545455	-0.647059	0.0555556	-0.809524	0.625	0	0	0.904762	0.43662	0.22807	0.97619	0.384615	-0.172414	-0.818182	-0.0357143	0.577465
										0.8	-0.0105263	-0.866667	0.166667	0.894737	-0.666667	0.333333	-0.16	-0.870968	0.773585	-0.234177	-0.2	-0.333333	-0.533157	0.506494	0.333333	0.72973	0.657143	0.171598	0.358974	-0.454545	-0.166667	0.302326	0.142857	0.545455	-0.647059	0.0555556	-0.809524	0.625	0	0	0.904762	0.43662	0.22807	0.97619	0.384615	-0.172414	-0.818182	-0.0357143	0.577465
										0.8	-0.0105263	-0.866667	0.166667	0.894737	-0.666667	0.333333	-0.16	-0.870968	0.773585	-0.234177	-0.2	-0.333333	-0.533157	0.506494	0.333333	0.72973	0.657143	0.171598	0.358974	-0.454545	-0.166667	0.302326	0.142857	0.545455	-0.647059	0.0555556	-0.809524	0.625	0	0	0.904762	0.43662	0.22807	0.97619	0.384615	-0.172414	-0.818182	-0.0357143	0.577465
										0.8	-0.0105263	-0.866667	0.166667	0.894737	-0.666667	0.333333	-0.16	-0.870968	0.773585	-0.234177	-0.2	-0.333333	-0.533157	0.506494	0.333333	0.72973	0.657143	0.171598	0.358974	-0.454545	-0.166667	0.302326	0.142857	0.545455	-0.647059	0.0555556	-0.809524	0.625	0	0	0.904762	0.43662	0.22807	0.97619	0.384615	-0.172414	-0.818182	-0.0357143	0.577465
										0.8	-0.0105263	-0.866667	0.166667	0.894737	-0.666667	0.333333	-0.16	-0.870968	0.773585	-0.234177	-0.2	-0.333333	-0.533157	0.506494	0.333333	0.72973	0.657143	0.171598	0.358974	-0.454545	-0.166667	0.302326	0.142857	0.545455	-0.647059	0.0555556	-0.809524	0.625	0	0	0.904762	0.43662	0.22807	0.97619	0.384615	-0.172414	-0.818182	-0.0357143	0.577465
										0.8	-0.0105263	-0.866667	0.166667	0.894737	-0.666667	0.333333	-0.16	-0.870968	0.773585	-0.234177	-0.2	-0.333333	-0.533157	0.506494	0.333333	0.72973	0.657143	0.171598	0.358974	-0.454545	-0.166667	0.302326	0.142857	0.545455	-0.647059	0.0555556	-0.809524	0.625	0	0	0.904762	0.43662	0.22807	0.97619	0.384615	-0.172414	-0.818182	-0.0357143	0.577465
										0.8	-0.0105263	-0.866667	0.166667	0.894737	-0.666667	0.333333	-0.16	-0.870968	0.773585	-0.234177	-0.2	-0.333333	-0.533157	0.506494	0.333333	0.72973	0.657143	0.171598	0.358974	-0.454545	-0.166667	0.302326	0.142857	0.545455	-0.647059	0.0555556	-0.809524	0.625	0	0	0.904762	0.43662	0.22807	0.97619	0.384615	-0.172414	-0.818182	-0.0357143	0.577465
										0.8	-0.0105263	-0.866667	0.166667	0.894737	-0.666667	0.333333	-0.16	-0.870968	0.773585	-0.234177	-0.2	-0.333333	-0.533157	0.506494	0.333333	0.72973	0.657143	0.171598	0.358974	-0.454545	-0.166667	0.302326	0.142857	0.545455	-0.647059	0.0555556	-0.809524	0.625	0	0	0.904762	0.43662	0.22807	0.97619	0.384615	-0.172414	-0.818182	-0.0357143	0.577465
										0.8	-0.0105263	-0.866667	0.166667	0.894737	-0.666667	0.333333	-0.16	-0.870968	0.773585	-0.234177	-0.2	-0.333333	-0.533157	0.487179	0.333333	0.72973	0.657143	0.171598	0.358974	-0.454545	-0.166667	0.302326	0.142857	0.545455	-0.647059	0.0555556	-0.809524	0.625	0	0	0.904762	0.43662	0.22807	0.97619	0.384615	-0.172414	-0.818182	-0.0357143	0.577465
										0.8	-0.0105263	-0.866667	0.166667	0.894737	-0.666667	0.333333	-0.16	-0.870968	0.773585	-0.234177	-0.2	-0.333333	-0.533157	0.487179	0.333333	0.72973	0.657143	0.171598	0.358974	-0.454545	-0.166667	0.302326	0.142857	0.545455	-0.647059	0.0555556	-0.809524	0.625	0	0	0.904762	0.43662	0.22807	0.97619	0.384615	-0.172414	-0.818182	-0.0357143	0.577465
										0.8	-0.0105263	-0.866667	0.166667	0.894737	-0.666667	0.333333	-0.16	-0.870968	0.773585	-0.234177	-0.2	-0.333333	-0.533157	0.487179	0.333333	0.72973	0.657143	0.171598	0.358974	-0.454545	-0.166667	0.302326	0.142857	0.545455	-0.647059	0.0555556	-0.809524	0.625	0	0	0.904762	0.43662	0.22807	0.97619	0.384615	-0.172414	-0.818182	-0.0357143	0.577465
										0.8	-0.0105263	-0.866667	0.166667	0.894737	-0.666667	0.333333	-0.16	-0.870968	0.773585	-0.234177	-0.2	-0.333333	-0.533157	0.487179	0.333333	0.72973	0.657143	0.171598	0.358974	-0.454545	-0.166667	0.302326	0.142857	0.545455	-0.647059	0.0555556	-0.809524	0.625	0	0	0.904762	0.43662	0.22807	0.97619	0.384615	-0.172414	-0.818182	-0.0357143	0.577465
										0.8	-0.0105263	-0.866667	0.166667	0.894737	-0.666667	0.333333	-0.16	-0.870968	0.773585	-0.234177	-0.2	-0.333333	-0.533157	0.487179	0.333333	0.72973	0.657143	0.171598	0.358974	-0.454545	-0.166667	0.302326	0.142857	0.545455	-0.647059	0.0555556	-0.809524	0.625	0	0	0.904762	0.43662	0.22807	0.97619	0.384615	-0.172414	-0.818182	-0.0357143	0.577465
										0.8	-0.0105263	-0.866667	0.166667	0.894737	-0.666667	0.333333	-0.16	-0.870968	0.773585	-0.234177	-0.2	-0.333333	-0.533157	0.487179	0.333333	0.72973	0.657143	0.171598	0.358974	-0.454545	-0.166667	0.302326	0.142857	0.545455	-0.647059	0.0555556	-0.809524	0.625	0	0	0.904762	0.43662	0.22807	0.97619	0.384615	-0.172414	-0.818182	-0.0357143	0.577465
										0.8	-0.0105263	-0.866667	0.166667	0.894737	-0.666667	0.333333	-0.16	-0.870968	0.773585	-0.234177	-0.2	-0.333333	-0.533157	0.487179	0.333333	0.72973	0.657143	0.171598	0.358974	-0.454545	-0.166667	0.302326	0.142857	0.545455	-0.647059	0.0555556	-0.809524	0.625	0	0	0.904762	0.43662	0.22807	0.97619	0.384615	-0.172414	-0.818182	-0.0357143	0.577465
										0.8	-0.0105263	-0.866667	0.166667	0.894737	-0.666667	0.333333	-0.16	-0.870968	0.773585	-0.234177	-0.2	-0.333333	-0.533157	0.487179	0.333333	0.72973	0.657143	0.171598	0.358974	-0.454545	-0.166667	0.302326	0.142857	0.545455	-0.647059	0.0555556	-0.809524	0.625	0	0	0.904762	0.43662	0.22807	0.97619	0.384615	-0.2	-0.818182	-0.0357143	0.577465
										0.8	-0.0105263	-0.866667	0.166667	0.894737	-0.666667	0.333333	-0.16	-0.870968	0.773585	-0.234177	-0.2	-0.333333	-0.533157	0.487179	0.333333	0.72973	0.657143	0.171598	0.358974	-0.454545	-0.166667	0.302326	0.142857	0.545455	-0.647059	0.0555556	-0.809524	0.625	0	0	0.904762	0.43662	0.22807	0.97619	0.384615	-0.2	-0.818182	-0.0357143	0.577465
										0.8	-0.0105263	-0.866667	0.285714	0.894737	-0.666667	0.333333	-0.16	-0.870968	0.773585	-0.234177	-0.2	-0.333333	-0.533157	0.487179	0.333333	0.72973	0.657143	0.171598	0.358974	-0.454545	-0.166667	0.302326	0.142857	0.545455	-0.647059	0.0555556	-0.809524	0.625	0	0	0.904762	0.43662	0.22807	0.97619	0.384615	-0.2	-0.818182	-0.0357143	0.577465
										0.8	-0.0105263	-0.866667	0.354839	0.894737	-0.666667	0.333333	-0.16	-0.870968	0.773585	-0.234177	-0.2	-0.333333	-0.533157	0.487179	0.333333	0.72973	0.657143	0.171598	0.358974	-0.454545	-0.166667	0.302326	0.142857	0.545455	-0.647059	0.0555556	-0.809524	0.625	0	0	0.904762	0.43662	0.22807	0.97619	0.384615	-0.2	-0.818182	-0.0357143	0.577465
										0.8	-0.0105263	-0.866667	0.354839	0.894737	-0.666667	0.333333	-0.16	-0.870968	0.773585	-0.234177	-0.2	-0.333333	-0.533157	0.487179	0.333333	0.72973	0.657143	0.171598	0.358974	-0.454545	-0.166667	0.302326	0.142857	0.545455	-0.647059	0.0555556	-0.809524	0.625	0	0	0.904762	0.43662	0.22807	0.97619	0.384615	-0.2	-0.818182	-0.0357143	0.577465
										0.8	-0.0105263	-0.866667	0.354839	0.894737	-0.666667	0.333333	-0.16	-0.870968	0.773585	-0.234177	-0.2	-0.333333	-0.533157	0.487179	0.333333	0.72973	0.657143	0.171598	0.358974	-0.454545	-0.166667	0.302326	0.142857	0.545455	-0.647059	0.0555556	-0.809524	0.625	0	0	0.904762	0.43662	0.22807	0.97619	0.384615	-0.2	-0.818182	-0.0357143	0.577465
										0.8	-0.0105263	-0.866667	0.354839	0.894737	-0.666667	0.333333	-0.16	-0.870968	0.773585	-0.234177	-0.2	-0.333333	-0.533157	0.487179	0.333333	0.72973	0.657143	0.171598	0.358974	-0.454545	-0.166667	0.302326	0.142857	0.545455	-0.647059	0.0555556	-0.809524	0.625	0	0	0.904762	0.43662	0.22807	0.97619	0.384615	-0.2	-0.818182	-0.0357143	0.577465
										0.8	-0.0105263	-0.866667	0.354839	0.894737	-0.666667	0.333333	-0.16	-0.870968	0.773585	-0.234177	-0.2	-0.333333	-0.533157	0.487179	0.333333	0.72973	0.657143	0.171598	0.358974	-0.454545	-0.166667	0.302326	0.142857	0.545455	-0.647059	0.0555556	-0.809524	0.625	0	0	0.904762	0.43662	0.22807	0.97619	0.384615	-0.2	-0.818182	-0.0357143	0.577465
										0.8	-0.0105263	-0.866667	0.354839	0.894737	-0.666667	0.333333	-0.16	-0.870968	0.773585	-0.234177	-0.2	-0.333333	-0.533157	0.487179	0.333333	0.72973	0.657143	0.171598	0.358974	-0.454545	-0.166667	0.302326	0.142857	0.545455	-0.647059	0.0555556	-0.809524	0.625	0	0	0.904762	0.43662	0.22807	0.97619	0.384615	-0.2	-0.818182	-0.0357143	0.577465
										0.8	-0.0105263	-0.866667	0.354839	0.894737	-0.666667	0.333333	-0.16	-0.870968	0.773585	-0.234177	-0.2	-0.333333	-0.533157	0.487179	0.333333	0.72973	0.657143	0.144509	0.358974	-0.454545	-0.166667	0.302326	0.142857	0.545455	-0.647059	0.0555556	-0.809524	0.625	0	0	0.904762	0.43662	0.22807	0.97619	0.384615	-0.2	-0.818182	-0.0357143	0.577465
										0.8	-0.0105263	-0.866667	0.354839	0.894737	-0.666667	0.333333	-0.16	-0.870968	0.773585	-0.234177	-0.2	-0.333333	-0.533157	0.487179	0.333333	0.72973	0.657143	0.125	0.358974	-0.454545	-0.166667	0.302326	0.142857	0.545455	-0.647059	0.0555556	-0.809524	0.625	0	0	0.904762	0.43662	0.22807	0.97619	0.384615	-0.2	-0.818182	-0.0357143	0.577465
										0.8	-0.0105263	-0.866667	0.354839	0.894737	-0.666667	0.333333	-0.16	-0.870968	0.773585	-0.234177	-0.2	-0.333333	-0.533157	0.487179	0.333333	0.72973	0.657143	0.125	0.358974	-0.454545	-0.166667	0.302326	0.142857	0.545455	-0.647059	0.0555556	-0.809524	0.625	0	0	0.904762	0.43662	0.22807	0.97619	0.285714	-0.2	-0.818182	-0.0357143	0.577465
										0.8	-0.0105263	-0.866667	0.354839	0.894737	-0.666667	0.333333	-0.16	-0.870968	0.773585	-0.234177	-0.2	-0.333333	-0.533157	0.487179	0.333333	0.72973	0.657143	0.125	0.358974	-0.454545	-0.166667	0.302326	0.142857	0.545455	-0.647059	0.0555556	-0.809524	0.625	0	0	0.904762	0.43662	0.22807	0.97619	0.285714	-0.2	-0.818182	-0.0357143	0.577465
										0.8	-0.0105263	-0.866667	0.354839	0.894737	-0.666667	0.333333	-0.16	-0.870968	0.773585	-0.234177	-0.2	-0.333333	-0.533157	0.487179	0.333333	0.72973	0.657143	0.125	0.358974	-0.454545	-0.166667	0.302326	0.142857	0.545455	-0.647059	0.0555556	-0.809524	0.625	0	0	0.904762	0.43662	0.22807	0.97619	0.285714	-0.2	-0.818182	-0.0357143	0.577465
										0.8	-0.0105263	-0.866667	0.354839	0.894737	-0.666667	0.333333	-0.16	-0.870968	0.773585	-0.234177	-0.2	-0.333333	-0.533157	0.487179	0.333333	0.72973	0.657143	0.125	0.358974	-0.454545	-0.166667	0.302326	0.142857	0.545455	-0.647059	0.0555556	-0.809524	0.625	0	0	0.904762	0.43662	0.22807	0.97619	0.285714	-0.2	-0.818182	-0.0357143	0.577465
										0.8	-0.0105263	-0.866667	0.354839	0.894737	-0.666667	0.333333	-0.16	-0.870968	0.773585	-0.234177	-0.2	-0.333333	-0.533157	0.487179	0.333333	0.72973	0.657143	0.125	0.358974	-0.454545	-0.166667	0.302326	0.142857	0.545455	-0.647059	0.0555556	-0.809524	0.625	0	0	0.904762	0.43662	0.22807	0.97619	0.285714	-0.2	-0.818182	-0.0357143	0.577465
										0.8	-0.0105263	-0.866667	0.354839	0.894737	-0.666667	0.333333	-0.16	-0.870968	0.773585	-0.234177	-0.2	-0.333333	-0.533157	0.487179	0.333333	0.72973	0.657143	0.125	0.358974	-0.454545	-0.166667	0.302326	0.142857	0.545455	-0.647059	0.0555556	-0.809524	0.625	0	0	0.904762	0.43662	0.22807	0.97619	0.285714	-0.2	-0.818182	-0.0357143	0.577465
										0.8	-0.0105263	-0.866667	0.354839	0.894737	-0.666667	0.333333	-0.16	-0.870968	0.773585	-0.234177	-0.2	-0.333333	-0.533157	0.487179	0.333333	0.72973	0.657143	0.125	0.358974	-0.454545	-0.166667	0.302326	0.142857	0.545455	-0.647059	0.0555556	-0.809524	0.625	0	0	0.904762	0.43662	0.22807	0.97619	0.285714	-0.2	-0.818182	-0.0357143	0.577465
										0.8	-0.0105263	-0.866667	0.354839	0.894737	-0.666667	0.333333	-0.16	-0.870968	0.773585	-0.234177	-0.2	-0.333333	-0.533157	0.487179	0.333333	0.72973	0.657143	0.125	0.358974	-0.454545	-0.166667	0.302326	0.142857	0.545455	-0.647059	0.0555556	-0.809524	0.625	0	0	0.904762	0.43662	0.22807	0.97619	0.285714	-0.2	-0.818182	-0.0357143	0.577465
										0.8	-0.0105263	-0.866667	0.354839	0.894737	-0.666667	0.333333	-0.16	-0.870968	0.773585	-0.234177	-0.2	-0.333333	-0.533157	0.487179	0.333333	0.72973	0.657143	0.125	0.358974	-0.454545	-0.166667	0.302326	0.142857	0.545455	-0.647059	0.0555556	-0.809524	0.625	0	0	0.904762	0.43662	0.22807	0.97619	0.285714	-0.2	-0.818182	-0.0357143	0.577465
										0.8	-0.0105263	-0.866667	0.354839	0.894737	-0.666667	0.333333	-0.16	-0.870968	0.773585	-0.234177	-0.2	-0.333333	-0.533157	0.487179	0.333333	0.72973	0.657143	0.125	0.358974	-0.454545	-0.166667	0.302326	0.142857	0.545455	-0.647059	0.0555556	-0.809524	0.625	0	0	0.904762	0.43662	0.22807	0.97619	0.285714	-0.2	-0.818182	-0.0357143	0.577465
										0.8	-0.0105263	-0.866667	0.354839	0.894737	-0.666667	0.333333	-0.16	-0.870968	0.773585	-0.234177	-0.2	-0.333333	-0.533157	0.487179	0.333333	0.72973	0.657143	0.125	0.358974	-0.454545	-0.166667	0.302326	0.142857	0.545455	-0.647059	0.0555556	-0.809524	0.625	0	0	0.904762	0.43662	0.22807	0.97619	0.285714	-0.2	-0.818182	-0.0357143	0.577465
										0.8	-0.0105263	-0.866667	0.354839	0.894737	-0.666667	0.333333	-0.16	-0.870968	0.773585	-0.234177	-0.2	-0.333333	-0.533157	0.487179	0.333333	0.72973	0.657143	0.125	0.358974	-0.454545	-0.166667	0.302326	0.142857	0.545455	-0.647059	0.0555556	-0.809524	0.625	0	0	0.904762	0.43662	0.22807	0.97619	0.285714	-0.2	-0.818182	-0.0357143	0.577465
										0.8	-0.0105263	-0.866667	0.354839	0.894737	-0.666667	0.333333	-0.16	-0.870968	0.773585	-0.234177	-0.2	-0.333333	-0.533157	0.487179	0.333333	0.72973	0.657143	0.125	0.358974	-0.454545	-0.166667	0.302326	0.142857	0.545455	-0.647059	0.0555556	-0.809524	0.625	0	0	0.904762	0.43662	0.22807	0.97619	0.285714	-0.2	-0.818182	-0.0357143	0.577465
										0.8	-0.0105263	-0.866667	0.354839	0.894737	-0.666667	0.333333	-0.16	-0.870968	0.773585	-0.234177	-0.2	-0.333333	-0.533157	0.487179	0.333333	0.72973	0.657143	0.125	0.358974	-0.454545	-0.166667	0.302326	0.142857	0.545455	-0.647059	0.0555556	-0.809524	0.625	0	0	0.904762	0.43662	0.22807	0.97619	0.285714	-0.2	-0.818182	-0.0357143	0.577465
										0.8	-0.0105263	-0.866667	0.354839	0.894737	-0.666667	0.333333	-0.16	-0.870968	0.773585	-0.234177	-0.2	-0.333333	-0.533157	0.487179	-0.2	0.72973	0.657143	0.125	0.358974	-0.454545	-0.166667	0.302326	0.142857	0.545455	-0.647059	0.0555556	-0.809524	0.625	0	0	0.904762	0.43662	0.22807	0.97619	0.285714	-0.2	-0.818182	-0.0357143	0.577465
										0.8	-0.0105263	-0.866667	0.354839	0.894737	-0.666667	0.333333	-0.16	-0.870968	0.773585	-0.234177	-0.2	-0.333333	-0.533157	0.487179	-0.2	0.72973	0.657143	0.125	0.358974	-0.454545	-0.166667	0.302326	0.142857	0.545455	-0.647059	0.0555556	-0.809524	0.625	0	0	0.904762	0.43662	0.22807	0.97619	0.285714	-0.2	-0.818182	-0.0357143	0.577465
										0.8	-0.0105263	-0.866667	0.354839	0.894737	-0.666667	0.333333	-0.16	-0.870968	0.773585	-0.234177	-0.2	-0.333333	-0.533157	0.487179	-0.2	0.72973	0.657143	0.125	0.358974	-0.454545	-0.166667	0.302326	0.142857	0.545455	-0.647059	0.0555556	-0.809524	0.625	0	0	0.904762	0.43662	0.22807	0.97619	0.285714	-0.2	-0.818182	-0.0357143	0.577465
										0.8	-0.0105263	-0.866667	0.354839	0.894737	-0.666667	0.333333	-0.16	-0.870968	0.773585	-0.234177	-0.2	-0.333333	-0.533157	0.487179	-0.333333	0.72973	0.657143	0.125	0.358974	-0.454545	-0.166667	0.302326	0.142857	0.545455	-0.647059	0.0555556	-0.809524	0.625	0	0	0.904762	0.43662	0.22807	0.97619	0.285714	-0.2	-0.818182	-0.0357143	0.577465
										0.8	-0.0105263	-0.866667	0.393939	0.894737	-0.666667	0.333333	-0.16	-0.870968	0.773585	-0.230284	-0.2	-0.333333	-0.533157	0.487179	-0.333333	0.72973	0.657143	0.125	0.358974	-0.454545	-0.166667	0.302326	0.142857	0.545455	-0.647059	0.0555556	-0.809524	0.625	0	0	0.904762	0.43662	0.22807	0.97619	0.285714	-0.2	-0.818182	-0.0357143	0.577465
										0.8	-0.0105263	-0.866667	0.393939	0.894737	-0.666667	0.333333	-0.16	-0.870968	0.773585	-0.230284	-0.2	-0.333333	-0.533157	0.487179	-0.333333	0.72973	0.657143	0.125	0.358974	-0.454545	-0.166667	0.302326	0.142857	0.545455	-0.647059	0.0555556	-0.809524	0.625	0	0	0.904762	0.43662	0.22807	0.97619	0.285714	-0.2	-0.818182	-0.0357143	0.577465
										0.8	-0.0105263	-0.866667	0.393939	0.894737	-0.666667	0.333333	-0.16	-0.870968	0.773585	-0.230284	-0.2	-0.333333	-0.533157	0.487179	-0.428571	0.72973	0.657143	0.125	0.358974	-0.454545	-0.166667	0.302326	0.142857	0.545455	-0.647059	0.0555556	-0.809524	0.625	0	0	0.904762	0.43662	0.22807	0.97619	0.285714	-0.2	-0.818182	-0.0357143	0.577465
										0.8	-0.0105263	-0.866667	0.393939	0.894737	-0.666667	0.333333	-0.16	-0.870968	0.773585	-0.230284	-0.2	-0.333333	-0.525066	0.487179	-0.5	0.72973	0.657143	0.125	0.358974	-0.454545	-0.166667	0.302326	0.142857	0.545455	-0.647059	0.0555556	-0.809524	0.625	0	0	0.904762	0.43662	0.22807	0.97619	0.285714	-0.2	-0.818182	-0.0357143	0.577465
										0.8	-0.0105263	-0.866667	0.393939	0.894737	-0.666667	0.333333	-0.16	-0.870968	0.773585	-0.230284	-0.2	-0.333333	-0.497409	0.487179	-0.555556	0.72973	0.657143	0.125	0.358974	-0.454545	-0.166667	0.302326	0.142857	0.545455	-0.647059	0.0555556	-0.809524	0.625	0	0	0.904762	0.43662	0.22807	0.97619	0.285714	-0.2	-0.818182	-0.0357143	0.577465
										0.8	-0.0105263	-0.866667	0.393939	0.894737	-0.666667	0.333333	-0.16	-0.870968	0.773585	-0.230284	-0.2	-0.333333	-0.482051	0.487179	-0.636364	0.72973	0.657143	0.125	0.358974	-0.454545	-0.166667	0.302326	0.142857	0.545455	-0.647059	0.0555556	-0.809524	0.625	0	0	0.904762	0.43662	0.22807	0.97619	0.285714	-0.225806	-0.818182	-0.0357143	0.577465
										0.8	-0.0105263	-0.866667	0.393939	0.894737	-0.666667	0.333333	-0.16	-0.870968	0.773585	-0.230284	-0.2	-0.333333	-0.463291	0.487179	-0.666667	0.72973	0.657143	0.125	0.358974	-0.454545	-0.166667	0.302326	0.142857	0.545455	-0.647059	0.0555556	-0.809524	0.625	0	0	0.904762	0.43662	0.22807	0.97619	0.285714	-0.225806	-0.818182	-0.0357143	0.577465
										0.8	-0.0105263	-0.866667	0.393939	0.894737	-0.666667	0.333333	-0.16	-0.870968	0.773585	-0.230284	-0.2	-0.333333	-0.459596	0.487179	-0.692308	0.72973	0.657143	0.125	0.358974	-0.454545	-0.166667	0.302326	0.142857	0.545455	-0.647059	0.0555556	-0.809524	0.625	0	0	0.904762	0.43662	0.22807	0.97619	0.285714	-0.225806	-0.818182	-0.0357143	0.577465
										0.8	-0.0105263	-0.866667	0.393939	0.894737	-0.666667	0.333333	-0.16	-0.870968	0.773585	-0.230284	-0.2	-0.333333	-0.459596	0.487179	-0.733333	0.72973	0.657143	0.125	0.358974	-0.454545	-0.166667	0.302326	0.142857	0.545455	-0.647059	0.0555556	-0.809524	0.625	0	0	0.904762	0.43662	0.22807	0.97619	0.285714	-0.225806	-0.818182	-0.0357143	0.577465
										0.8	-0.0105263	-0.866667	0.393939	0.894737	-0.666667	0.333333	-0.16	-0.870968	0.773585	-0.230284	-0.2	-0.333333	-0.455919	0.487179	-0.789474	0.72973	0.657143	0.125	0.358974	-0.454545	-0.166667	0.302326	0.142857	0.545455	-0.647059	0.0555556	-0.809524	0.625	0	0	0.904762	0.43662	0.22807	0.97619	0.285714	-0.225806	-0.818182	-0.0357143	0.577465
										0.8	-0.0105263	-0.866667	0.393939	0.894737	-0.666667	0.333333	-0.16	-0.870968	0.773585	-0.230284	-0.2	-0.333333	-0.455919	0.487179	-0.818182	0.72973	0.657143	0.125	0.358974	-0.454545	-0.166667	0.302326	0.142857	0.511111	-0.647059	0.0555556	-0.809524	0.625	0	0	0.904762	0.43662	0.22807	0.97619	0.285714	-0.225806	-0.818182	-0.0357143	0.577465
										0.8	-0.0105263	-0.866667	0.393939	0.894737	-0.666667	0.333333	-0.16	-0.870968	0.773585	-0.230284	-0.2	-0.333333	-0.455919	0.487179	-0.846154	0.72973	0.657143	0.125	0.358974	-0.454545	-0.166667	0.302326	0.142857	0.511111	-0.647059	0.0555556	-0.809524	0.625	0	0	0.904762	0.43662	0.22807	0.97619	0.285714	-0.225806	-0.818182	-0.0357143	0.577465
										0.8	-0.0105263	-0.866667	0.393939	0.894737	-0.666667	0.333333	-0.16	-0.870968	0.773585	-0.230284	-0.2	-0.333333	-0.455919	0.487179	-0.885714	0.72973	0.657143	0.125	0.358974	-0.454545	-0.166667	0.302326	0.142857	0.511111	-0.647059	0.0555556	-0.809524	0.625	0	0	0.904762	0.43662	0.22807	0.97619	0.285714	-0.225806	-0.818182	-0.0357143	0.577465
										0.8	-0.0105263	-0.866667	0.393939	0.894737	-0.666667	0.333333	-0.16	-0.870968	0.773585	-0.230284	-0.2	-0.333333	-0.455919	0.487179	-0.888889	0.72973	0.657143	0.125	0.358974	-0.454545	-0.166667	0.302326	0.142857	0.511111	-0.647059	0.0555556	-0.809524	0.625	0	0	0.904762	0.43662	0.22807	0.97619	0.285714	-0.225806	-0.818182	-0.0357143	0.577465
										0.8	-0.0105263	-0.866667	0.393939	0.894737	-0.666667	0.333333	-0.16	-0.870968	0.773585	-0.230284	-0.2	-0.333333	-0.455919	0.487179	-0.891892	0.72973	0.657143	0.125	0.358974	-0.454545	-0.166667	0.302326	0.142857	0.511111	-0.647059	0.0555556	-0.809524	0.625	0	0	0.904762	0.43662	0.22807	0.97619	0.285714	-0.225806	-0.818182	-0.0357143	0.577465
										0.8	-0.0105263	-0.866667	0.393939	0.894737	-0.666667	0.333333	-0.16	-0.870968	0.773585	-0.230284	-0.2	-0.333333	-0.455919	0.487179	-0.891892	0.72973	0.657143	0.125	0.358974	-0.454545	-0.166667	0.302326	0.142857	0.511111	-0.647059	0.0555556	-0.826087	0.625	0	0	0.904762	0.43662	0.22807	0.97619	0.285714	-0.225806	-0.818182	-0.0357143	0.577465
										0.8	-0.0105263	-0.866667	0.393939	0.894737	-0.666667	0.333333	-0.16	-0.870968	0.773585	-0.230284	-0.2	-0.333333	-0.455919	0.487179	-0.891892	0.72973	0.657143	0.125	0.358974	-0.454545	-0.166667	0.302326	0.142857	0.511111	-0.647059	0.0555556	-0.870968	0.625	0	0	0.904762	0.43662	0.22807	0.97619	0.285714	-0.225806	-0.818182	-0.0357143	0.577465
										0.8	-0.0105263	-0.866667	0.393939	0.894737	-0.666667	0.333333	-0.16	-0.870968	0.773585	-0.230284	-0.2	-0.333333	-0.455919	0.487179	-0.891892	0.72973	0.657143	0.125	0.358974	-0.454545	-0.166667	0.302326	0.142857	0.511111	-0.647059	0.0555556	-0.870968	0.625	0	0	0.904762	0.43662	0.22807	0.97619	0.285714	-0.225806	-0.818182	-0.0357143	0.577465
										0.8	-0.0105263	-0.866667	0.411765	0.894737	-0.666667	0.333333	-0.16	-0.870968	0.773585	-0.230284	-0.2	-0.333333	-0.455919	0.487179	-0.891892	0.72973	0.657143	0.125	0.358974	-0.454545	-0.166667	0.302326	0.142857	0.511111	-0.647059	0.0555556	-0.870968	0.625	0	0	0.904762	0.43662	0.22807	0.97619	0.285714	-0.225806	-0.818182	-0.0357143	0.577465
										0.8	-0.0105263	-0.866667	0.411765	0.894737	-0.666667	0.333333	-0.16	-0.870968	0.773585	-0.230284	-0.2	-0.333333	-0.455919	0.487179	-0.894737	0.72973	0.657143	0.125	0.358974	-0.454545	-0.166667	0.302326	0.142857	0.511111	-0.647059	0.0555556	-0.875	0.625	0	0	0.904762	0.43662	0.22807	0.97619	0.285714	-0.225806	-0.818182	-0.0357143	0.577465
										0.8	-0.0105263	-0.866667	0.411765	0.894737	-0.666667	0.333333	-0.16	-0.870968	0.773585	-0.230284	-0.2	-0.333333	-0.455919	0.487179	-0.9	0.72973	0.657143	0.125	0.358974	-0.454545	-0.166667	0.302326	0.142857	0.511111	-0.647059	0.0555556	-0.875	0.625	0	0	0.904762	0.43662	0.22807	0.97619	0.285714	-0.225806	-0.818182	-0.0357143	0.577465
										0.8	-0.0105263	-0.866667	0.428571	0.894737	-0.666667	0.333333	-0.16	-0.870968	0.773585	-0.230284	-0.2	-0.333333	-0.455919	0.487179	-0.909091	0.72973	0.657143	0.125	0.358974	-0.454545	-0.166667	0.302326	0.142857	0.511111	-0.647059	0.0555556	-0.875	0.625	0	0	0.904762	0.43662	0.22807	0.97619	0.285714	-0.225806	-0.818182	-0.0357143	0.577465
										0.8	-0.0105263	-0.866667	0.444445	0.894737	-0.666667	0.333333	-0.16	-0.870968	0.773585	-0.226415	-0.2	-0.333333	-0.452261	0.487179	-0.918367	0.72973	0.657143	0.125	0.358974	-0.454545	-0.166667	0.302326	0.142857	0.511111	-0.647059	0.0555556	-0.875	0.625	0	0	0.904762	0.43662	0.22807	0.97619	0.285714	-0.225806	-0.818182	-0.0357143	0.577465
										0.8	-0.0105263	-0.866667	0.487179	0.894737	-0.666667	0.333333	-0.16	-0.870968	0.773585	-0.226415	-0.2	-0.333333	-0.452261	0.487179	-0.92	0.72973	0.657143	0.125	0.358974	-0.454545	-0.166667	0.302326	0.142857	0.511111	-0.647059	0.0555556	-0.875	0.625	0	0	0.904762	0.43662	0.22807	0.97619	0.285714	-0.225806	-0.818182	-0.0357143	0.577465
										0.8	-0.0105263	-0.866667	0.52381	0.894737	-0.666667	0.333333	-0.16	-0.870968	0.773585	-0.226415	-0.2	-0.333333	-0.452261	0.487179	-0.921569	0.72973	0.657143	0.125	0.358974	-0.454545	-0.166667	0.302326	0.142857	0.511111	-0.647059	0.105263	-0.875	0.625	0	0	0.904762	0.43662	0.22807	0.97619	0.285714	-0.225806	-0.818182	-0.0357143	0.577465
										0.8	-0.0105263	-0.866667	0.534884	0.894737	-0.666667	0.333333	-0.16	-0.870968	0.773585	-0.226415	-0.2	-0.333333	-0.452261	0.487179	-0.921569	0.72973	0.657143	0.125	0.358974	-0.454545	-0.166667	0.302326	0.142857	0.511111	-0.647059	0.276596	-0.875	0.625	0	0	0.904762	0.43662	0.22807	0.97619	0.285714	-0.225806	-0.818182	-0.0357143	0.577465
										0.8	-0.0105263	-0.866667	0.545455	0.894737	-0.666667	0.333333	-0.16	-0.870968	0.773585	-0.226415	-0.2	-0.333333	-0.452261	0.487179	-0.921569	0.72973	0.657143	0.125	0.358974	-0.454545	-0.166667	0.302326	0.142857	0.511111	-0.647059	0.276596	-0.875	0.625	0	0	0.904762	0.43662	0.22807	0.97619	0.285714	-0.225806	-0.818182	-0.0357143	0.577465
										0.8	-0.0105263	-0.866667	0.591837	0.894737	-0.666667	0.333333	-0.16	-0.870968	0.773585	-0.226415	-0.2	-0.333333	-0.452261	0.487179	-0.921569	0.72973	0.657143	0.125	0.358974	-0.454545	-0.166667	0.302326	0.142857	0.511111	-0.647059	0.276596	-0.875	0.625	0	0	0.904762	0.43662	0.22807	0.97619	0.285714	-0.225806	-0.818182	-0.0357143	0.577465
										0.8	-0.0105263	-0.866667	0.6	0.894737	-0.666667	0.333333	-0.16	-0.870968	0.773585	-0.226415	-0.2	-0.333333	-0.441397	0.487179	-0.921569	0.72973	0.657143	0.125	0.358974	-0.454545	-0.166667	0.302326	0.142857	0.511111	-0.647059	0.276596	-0.875	0.625	0	0	0.904762	0.43662	0.22807	0.97619	0.285714	-0.225806	-0.818182	-0.0357143	0.577465
										0.8	-0.0105263	-0.866667	0.615385	0.894737	-0.666667	0.333333	-0.16	-0.870968	0.773585	-0.226415	-0.2	-0.333333	-0.423645	0.487179	-0.921569	0.72973	0.657143	0.125	0.358974	-0.454545	-0.166667	0.302326	0.142857	0.511111	-0.647059	0.276596	-0.875	0.625	0	0	0.904762	0.43662	0.22807	0.97619	0.285714	-0.225806	-0.818182	-0.0357143	0.577465
										0.8	-0.0105263	-0.866667	0.615385	0.894737	-0.666667	0.333333	-0.16	-0.870968	0.773585	-0.226415	-0.2	-0.333333	-0.423645	0.487179	-0.921569	0.72973	0.657143	0.125	0.358974	-0.454545	-0.166667	0.142857	0.142857	0.511111	-0.647059	0.276596	-0.875	0.625	0	0	0.904762	0.43662	0.22807	0.97619	0.285714	-0.225806	-0.818182	-0.0357143	0.577465
										0.8	-0.0105263	-0.866667	0.615385	0.894737	-0.666667	0.333333	-0.16	-0.870968	0.773585	-0.226415	-0.2	-0.333333	-0.427873	0.487179	-0.921569	0.72973	0.657143	0.134831	0.358974	-0.454545	-0.166667	0.0181818	0.142857	0.511111	-0.647059	0.276596	-0.875	0.625	0	0	0.904762	0.43662	0.22807	0.97619	0.285714	-0.225806	-0.818182	-0.0357143	0.577465
										0.8	-0.0105263	-0.866667	0.622641	0.894737	-0.666667	0.333333	-0.16	-0.870968	0.773585	-0.226415	-0.2	-0.333333	-0.433414	0.487179	-0.921569	0.72973	0.657143	0.153846	0.358974	-0.454545	-0.166667	0	0.142857	0.511111	-0.647059	0.276596	-0.875	0.625	0	0	0.904762	0.43662	0.22807	0.97619	0.285714	-0.225806	-0.818182	-0.0357143	0.577465
										0.8	-0.0105263	-0.866667	0.622641	0.894737	-0.666667	0.333333	-0.16	-0.870968	0.773585	-0.226415	-0.2	-0.333333	-0.429952	0.487179	-0.921569	0.72973	0.657143	0.15847	0.358974	-0.454545	-0.166667	0	0.142857	0.511111	-0.647059	0.276596	-0.875	0.625	0	0	0.904762	0.43662	0.22807	0.97619	0.285714	-0.225806	-0.818182	-0.0357143	0.577465
										0.8	-0.0105263	-0.866667	0.622641	0.894737	-0.666667	0.333333	-0.16	-0.870968	0.773585	-0.226415	-0.2	-0.333333	-0.409524	0.487179	-0.921569	0.72973	0.657143	0.163044	0.358974	-0.454545	-0.166667	-0.0175439	0.142857	0.511111	-0.647059	0.276596	-0.875	0.625	0	0	0.904762	0.43662	0.22807	0.97619	0.285714	-0.225806	-0.818182	-0.0357143	0.577465
										0.8	-0.0105263	-0.866667	0.636364	0.894737	-0.666667	0.333333	-0.16	-0.870968	0.773585	-0.226415	-0.2	-0.333333	-0.386417	0.487179	-0.921569	0.72973	0.657143	0.163044	0.358974	-0.454545	-0.166667	-0.0175439	0.142857	0.511111	-0.647059	0.276596	-0.875	0.625	0	0	0.904762	0.43662	0.22807	0.97619	0.285714	-0.225806	-0.818182	-0.0357143	0.577465
										0.8	-0.0105263	-0.866667	0.655172	0.894737	-0.666667	0.333333	-0.16	-0.870968	0.773585	-0.226415	-0.2	-0.333333	-0.364055	0.487179	-0.921569	0.72973	0.657143	0.163044	0.358974	-0.454545	-0.166667	-0.0175439	0.142857	0.511111	-0.647059	0.276596	-0.875	0.625	0	0	0.904762	0.43662	0.22807	0.97619	0.285714	-0.225806	-0.818182	-0.0357143	0.577465
										0.8	-0.0105263	-0.866667	0.661017	0.894737	-0.666667	0.333333	-0.16	-0.870968	0.773585	-0.226415	-0.2	-0.333333	-0.364055	0.487179	-0.921569	0.72973	0.657143	0.163044	0.358974	-0.454545	-0.166667	-0.0175439	0.142857	0.511111	-0.647059	0.276596	-0.875	0.625	0	0	0.904762	0.43662	0.22807	0.97619	0.285714	-0.225806	-0.818182	-0.0357143	0.577465
										0.8	-0.0105263	-0.866667	0.666667	0.894737	-0.666667	0.333333	-0.16	-0.870968	0.773585	-0.226415	-0.2	-0.333333	-0.354691	0.487179	-0.921569	0.72973	0.657143	0.163044	0.358974	-0.454545	-0.166667	-0.0175439	0.142857	0.511111	-0.647059	0.276596	-0.875	0.625	0	0	0.904762	0.43662	0.22807	0.97619	0.285714	-0.225806	-0.818182	-0.0357143	0.577465
										0.8	-0.0105263	-0.866667	0.666667	0.894737	-0.666667	0.333333	-0.16	-0.870968	0.773585	-0.226415	-0.2	-0.333333	-0.354691	0.487179	-0.921569	0.72973	0.657143	0.163044	0.358974	-0.454545	-0.166667	-0.0175439	0.142857	0.511111	-0.647059	0.276596	-0.875	0.625	0	0	0.904762	0.43662	0.22807	0.97619	0.285714	-0.225806	-0.818182	-0.0357143	0.577465
										0.8	-0.0105263	-0.866667	0.677419	0.894737	-0.666667	0.333333	-0.16	-0.870968	0.773585	-0.226415	-0.2	-0.333333	-0.354691	0.487179	-0.921569	0.72973	0.657143	0.163044	0.358974	-0.454545	-0.166667	-0.0175439	0.142857	0.511111	-0.647059	0.276596	-0.875	0.625	0	0	0.904762	0.43662	0.22807	0.97619	0.285714	-0.225806	-0.818182	-0.0357143	0.577465
										0.8	-0.0105263	-0.866667	0.677419	0.894737	-0.666667	0.333333	-0.16	-0.870968	0.773585	-0.226415	-0.2	-0.333333	-0.354691	0.487179	-0.921569	0.72973	0.657143	0.163044	0.358974	-0.454545	-0.166667	-0.0175439	0.142857	0.511111	-0.647059	0.276596	-0.875	0.625	0	0	0.904762	0.43662	0.22807	0.97619	0.285714	-0.225806	-0.818182	-0.0357143	0.577465
										0.8	-0.0105263	-0.866667	0.677419	0.894737	-0.666667	0.333333	-0.16	-0.870968	0.773585	-0.226415	-0.2	-0.333333	-0.354691	0.487179	-0.924528	0.72973	0.657143	0.163044	0.358974	-0.454545	-0.166667	-0.0175439	0.142857	0.511111	-0.647059	0.276596	-0.875	0.625	0	0	0.904762	0.43662	0.22807	0.97619	0.285714	-0.225806	-0.818182	-0.0357143	0.577465
										0.8	-0.0105263	-0.866667	0.68254	0.894737	-0.666667	0.333333	-0.16	-0.870968	0.773585	-0.226415	-0.2	-0.333333	-0.354691	0.487179	-0.929825	0.72973	0.657143	0.163044	0.358974	-0.454545	-0.166667	-0.0175439	0.142857	0.511111	-0.647059	0.276596	-0.875	0.625	0	0	0.904762	0.43662	0.22807	0.97619	0.285714	-0.225806	-0.818182	-0.0357143	0.577465
										0.8125	-0.0105263	-0.866667	0.6875	0.894737	-0.666667	0.333333	-0.16	-0.870968	0.773585	-0.226415	-0.2	-0.333333	-0.354691	0.487179	-0.935484	0.72973	0.657143	0.163044	0.358974	-0.454545	-0.166667	-0.0175439	0.142857	0.511111	-0.647059	0.276596	-0.875	0.625	0	0	0.904762	0.43662	0.22807	0.97619	0.285714	-0.225806	-0.818182	-0.0357143	0.577465
										0.815385	-0.0105263	-0.866667	0.6875	0.894737	-0.666667	0.333333	-0.16	-0.870968	0.773585	-0.226415	-0.2	-0.333333	-0.354691	0.487179	-0.936508	0.72973	0.657143	0.163044	0.358974	-0.454545	-0.166667	-0.0175439	0.142857	0.511111	-0.647059	0.276596	-0.875	0.625	0	0	0.904762	0.43662	0.22807	0.97619	0.285714	-0.225806	-0.818182	-0.0357143	0.577465
										0.818182	-0.0105263	-0.866667	0.692308	0.894737	-0.666667	0.333333	-0.16	-0.870968	0.773585	-0.226415	-0.2	-0.333333	-0.354691	0.487179	-0.936508	0.72973	0.657143	0.163044	0.358974	-0.454545	-0.166667	-0.0175439	0.142857	0.511111	-0.647059	0.276596	-0.875	0.625	0	0	0.904762	0.43662	0.22807	0.97619	0.285714	-0.225806	-0.818182	-0.0357143	0.577465
										0.820896	-0.0105263	-0.866667	0.701493	0.894737	-0.666667	0.333333	-0.16	-0.870968	0.773585	-0.226415	-0.2	-0.333333	-0.345454	0.487179	-0.936508	0.72973	0.657143	0.163044	0.358974	-0.454545	-0.166667	-0.0175439	0.142857	0.511111	-0.647059	0.276596	-0.875	0.625	0	0	0.904762	0.43662	0.22807	0.97619	0.285714	-0.225806	-0.818182	-0.0357143	0.577465
										0.826087	-0.0105263	-0.866667	0.71831	0.894737	-0.666667	0.333333	-0.16	-0.870968	0.773585	-0.226415	-0.2	-0.333333	-0.327354	0.487179	-0.936508	0.72973	0.657143	0.163044	0.358974	-0.454545	-0.166667	-0.0508475	0.142857	0.511111	-0.647059	0.276596	-0.875	0.625	0	0	0.904762	0.43662	0.22807	0.97619	0.285714	-0.225806	-0.818182	-0.0357143	0.577465
										0.828571	-0.0105263	-0.866667	0.72973	0.894737	-0.666667	0.333333	-0.16	-0.870968	0.773585	-0.226415	-0.2	-0.333333	-0.303965	0.487179	-0.936508	0.72973	0.657143	0.163044	0.358974	-0.454545	-0.166667	-0.0508475	0.142857	0.511111	-0.647059	0.276596	-0.875	0.625	0	0	0.904762	0.43662	0.22807	0.97619	0.285714	-0.225806	-0.818182	-0.0357143	0.577465
										0.835616	-0.0105263	-0.866667	0.74359	0.894737	-0.666667	0.333333	-0.16	-0.870968	0.773585	-0.226415	-0.2	-0.333333	-0.286957	0.487179	-0.936508	0.72973	0.657143	0.163044	0.358974	-0.454545	-0.166667	-0.0508475	0.142857	0.511111	-0.647059	0.276596	-0.875	0.625	0	0	0.904762	0.43662	0.22807	0.97619	0.285714	-0.225806	-0.818182	-0.0357143	0.577465
										0.842105	-0.0105263	-0.866667	0.75	0.894737	-0.666667	0.333333	-0.16	-0.870968	0.773585	-0.226415	-0.2	-0.333333	-0.284165	0.487179	-0.936508	0.72973	0.657143	0.163044	0.358974	-0.454545	-0.166667	-0.0508475	0.142857	0.511111	-0.647059	0.276596	-0.875	0.625	0	0	0.904762	0.43662	0.22807	0.97619	0.285714	-0.225806	-0.818182	-0.0357143	0.577465
										0.848101	-0.0105263	-0.866667	0.756098	0.894737	-0.666667	0.333333	-0.16	-0.870968	0.773585	-0.226415	-0.2	-0.333333	-0.284165	0.487179	-0.936508	0.72973	0.657143	0.163044	0.358974	-0.454545	-0.166667	-0.0508475	0.142857	0.511111	-0.647059	0.276596	-0.875	0.625	0	0	0.904762	0.43662	0.22807	0.97619	0.285714	-0.225806	-0.818182	-0.0357143	0.577465
										0.85	-0.0105263	-0.866667	0.756098	0.894737	-0.666667	0.333333	-0.16	-0.870968	0.773585	-0.226415	-0.2	-0.333333	-0.281385	0.487179	-0.936508	0.72973	0.657143	0.163044	0.358974	-0.454545	-0.166667	-0.0508475	0.142857	0.511111	-0.647059	0.276596	-0.875	0.625	0	0	0.904762	0.43662	0.22807	0.97619	0.285714	-0.225806	-0.818182	-0.0357143	0.577465
										0.851852	-0.0105263	-0.866667	0.761905	0.894737	-0.666667	0.333333	-0.16	-0.870968	0.773585	-0.226415	-0.2	-0.333333	-0.281385	0.487179	-0.936508	0.72973	0.657143	0.163044	0.358974	-0.454545	-0.166667	-0.0508475	0.142857	0.511111	-0.647059	0.276596	-0.875	0.625	0	0	0.904762	0.43662	0.22807	0.97619	0.285714	-0.225806	-0.818182	-0.0357143	0.577465
										0.851852	-0.0105263	-0.866667	0.764706	0.894737	-0.666667	0.333333	-0.16	-0.870968	0.773585	-0.226415	-0.2	-0.333333	-0.281385	0.487179	-0.936508	0.72973	0.657143	0.163044	0.358974	-0.454545	-0.166667	-0.0508475	0.142857	0.511111	-0.647059	0.276596	-0.875	0.625	0	0	0.904762	0.43662	0.22807	0.97619	0.285714	-0.225806	-0.818182	-0.0357143	0.577465
										0.853659	-0.0105263	-0.866667	0.767442	0.894737	-0.666667	0.333333	-0.16	-0.870968	0.773585	-0.226415	-0.2	-0.333333	-0.281385	0.487179	-0.936508	0.72973	0.657143	0.163044	0.358974	-0.454545	-0.166667	-0.0508475	0.142857	0.511111	-0.647059	0.276596	-0.875	0.625	0	0	0.904762	0.43662	0.22807	0.97619	0.285714	-0.225806	-0.818182	-0.0357143	0.577465
										0.853659	-0.0105263	-0.866667	0.775281	0.894737	-0.666667	0.333333	-0.16	-0.870968	0.773585	-0.226415	-0.2	-0.333333	-0.281385	0.487179	-0.936508	0.72973	0.657143	0.163044	0.358974	-0.454545	-0.166667	-0.0508475	0.142857	0.511111	-0.647059	0.276596	-0.875	0.625	0	0	0.904762	0.43662	0.22807	0.97619	0.285714	-0.225806	-0.818182	-0.0357143	0.577465
										0.853659	-0.0105263	-0.866667	0.787234	0.894737	-0.666667	0.333333	-0.16	-0.870968	0.773585	-0.226415	-0.2	-0.333333	-0.281385	0.487179	-0.936508	0.72973	0.657143	0.163044	0.358974	-0.454545	-0.166667	-0.0508475	0.142857	0.511111	-0.647059	0.276596	-0.875	0.625	0	0	0.904762	0.43662	0.22807	0.97619	0.285714	-0.225806	-0.818182	-0.0357143	0.577465
										0.853659	-0.0105263	-0.866667	0.79798	0.894737	-0.666667	0.333333	-0.16	-0.870968	0.773585	-0.226415	-0.2	-0.333333	-0.281385	0.487179	-0.936508	0.72973	0.657143	0.163044	0.358974	-0.454545	-0.166667	-0.0508475	0.142857	0.511111	-0.647059	0.276596	-0.875	0.625	0	0	0.904762	0.43662	0.22807	0.97619	0.285714	-0.225806	-0.833333	-0.0357143	0.577465
										0.853659	-0.0105263	-0.866667	0.813084	0.894737	-0.666667	0.333333	-0.16	-0.870968	0.773585	-0.226415	-0.2	-0.333333	-0.281385	0.487179	-0.936508	0.72973	0.657143	0.172043	0.358974	-0.454545	-0.166667	-0.0508475	0.142857	0.511111	-0.647059	0.276596	-0.875	0.625	0	0	0.904762	0.43662	0.22807	0.97619	0.285714	-0.225806	-0.833333	-0.0357143	0.577465
										0.853659	-0.0105263	-0.866667	0.821429	0.894737	-0.666667	0.333333	-0.16	-0.870968	0.773585	-0.226415	-0.2	-0.333333	-0.281385	0.487179	-0.936508	0.72973	0.657143	0.172043	0.358974	-0.454545	-0.166667	-0.0508475	0.142857	0.511111	-0.647059	0.276596	-0.875	0.625	0	0	0.904762	0.43662	0.22807	0.97619	0.285714	-0.225806	-0.833333	-0.0357143	0.577465
										0.853659	-0.0105263	-0.866667	0.824561	0.894737	-0.666667	0.333333	-0.16	-0.870968	0.649123	-0.226415	-0.2	-0.333333	-0.281385	0.487179	-0.936508	0.72973	0.657143	0.172043	0.358974	-0.454545	-0.166667	-0.0508475	0.142857	0.511111	-0.647059	0.276596	-0.875	0.625	0	0	0.904762	0.43662	0.22807	0.97619	0.285714	-0.225806	-0.833333	-0.0357143	0.577465
										0.853659	-0.0105263	-0.866667	0.824561	0.894737	-0.666667	0.333333	-0.16	-0.870968	0.649123	-0.226415	-0.2	-0.333333	-0.281385	0.487179	-0.936508	0.72973	0.657143	0.172043	0.358974	-0.454545	-0.166667	-0.0508475	0.142857	0.511111	-0.647059	0.276596	-0.875	0.625	0	0	0.904762	0.43662	0.22807	0.97619	0.285714	-0.225806	-0.833333	-0.0357143	0.577465
										0.853659	-0.0105263	-0.866667	0.824561	0.894737	-0.666667	0.333333	-0.16	-0.870968	0.649123	-0.226415	-0.2	-0.333333	-0.275862	0.487179	-0.936508	0.72973	0.657143	0.172043	0.358974	-0.454545	-0.166667	-0.0508475	0.142857	0.511111	-0.647059	0.276596	-0.875	0.625	0	0	0.904762	0.43662	0.22807	0.97619	0.285714	-0.225806	-0.833333	-0.0357143	0.577465
										0.853659	-0.0105263	-0.866667	0.824561	0.894737	-0.666667	0.333333	-0.16	-0.870968	0.649123	-0.226415	-0.2	-0.333333	-0.275862	0.487179	-0.936508	0.72973	0.657143	0.172043	0.358974	-0.454545	-0.166667	-0.0508475	0.142857	0.511111	-0.647059	0.276596	-0.875	0.625	0	0	0.904762	0.43662	0.22807	0.97619	0.285714	-0.225806	-0.833333	-0.0357143	0.577465
										0.853659	-0.0105263	-0.866667	0.826087	0.894737	-0.666667	0.333333	-0.16	-0.870968	0.649123	-0.226415	-0.2	-0.333333	-0.275862	0.487179	-0.936508	0.72973	0.657143	0.172043	0.358974	-0.454545	-0.166667	-0.0508475	0.142857	0.511111	-0.647059	0.276596	-0.875	0.625	0	0	0.904762	0.43662	0.22807	0.97619	0.285714	-0.225806	-0.833333	-0.0357143	0.577465
										0.853659	-0.0105263	-0.866667	0.826087	0.894737	-0.666667	0.333333	-0.16	-0.870968	0.649123	-0.226415	-0.2	-0.333333	-0.275862	0.487179	-0.936508	0.72973	0.657143	0.172043	0.358974	-0.454545	-0.166667	-0.0508475	0.142857	0.511111	-0.647059	0.276596	-0.875	0.625	0	0	0.904762	0.43662	0.22807	0.97619	0.285714	-0.225806	-0.833333	-0.0357143	0.577465
										0.853659	-0.0105263	-0.866667	0.826087	0.894737	-0.666667	0.333333	-0.16	-0.870968	0.649123	-0.226415	-0.2	-0.333333	-0.275862	0.487179	-0.936508	0.72973	0.657143	0.172043	0.358974	-0.454545	-0.166667	-0.0508475	0.142857	0.511111	-0.647059	0.276596	-0.875	0.625	0	0	0.904762	0.43662	0.22807	0.97619	0.285714	-0.225806	-0.833333	-0.0357143	0.577465
										0.853659	-0.0105263	-0.866667	0.826087	0.894737	-0.666667	0.333333	-0.16	-0.870968	0.649123	-0.226415	-0.2	-0.333333	-0.275862	0.487179	-0.936508	0.72973	0.657143	0.172043	0.358974	-0.454545	-0.166667	-0.0508475	0.142857	0.511111	-0.647059	0.276596	-0.875	0.625	0	0	0.904762	0.43662	0.22807	0.97619	0.285714	-0.225806	-0.833333	-0.0357143	0.577465
										0.853659	-0.0105263	-0.866667	0.826087	0.894737	-0.666667	0.333333	-0.16	-0.870968	0.649123	-0.226415	-0.2	-0.333333	-0.275862	0.487179	-0.936508	0.72973	0.657143	0.172043	0.358974	-0.454545	-0.166667	-0.0508475	0.142857	0.511111	-0.647059	0.276596	-0.875	0.625	0	0	0.904762	0.43662	0.22807	0.97619	0.285714	-0.225806	-0.833333	-0.0357143	0.577465
										0.853659	-0.0105263	-0.866667	0.82906	0.894737	-0.666667	0.333333	-0.16	-0.870968	0.649123	-0.226415	-0.2	-0.333333	-0.275862	0.487179	-0.936508	0.72973	0.657143	0.172043	0.358974	-0.454545	-0.166667	-0.0508475	0.142857	0.511111	-0.647059	0.276596	-0.875	0.625	0	0	0.904762	0.43662	0.22807	0.97619	0.285714	-0.225806	-0.846154	-0.0357143	0.577465
										0.853659	-0.0105263	-0.866667	0.82906	0.894737	-0.666667	0.333333	-0.16	-0.870968	0.649123	-0.226415	-0.2	-0.333333	-0.275862	0.487179	-0.936508	0.72973	0.657143	0.172043	0.358974	-0.454545	-0.166667	-0.0508475	0.142857	0.511111	-0.647059	0.276596	-0.875	0.625	0	0	0.904762	0.43662	0.22807	0.97619	0.285714	-0.225806	-0.846154	-0.0357143	0.577465
										0.853659	-0.0105263	-0.866667	0.82906	0.894737	-0.666667	0.333333	-0.16	-0.870968	0.649123	-0.226415	-0.2	-0.333333	-0.275862	0.487179	-0.936508	0.72973	0.657143	0.172043	0.358974	-0.454545	-0.166667	-0.0508475	0.142857	0.511111	-0.647059	0.276596	-0.875	0.625	0	0	0.904762	0.43662	0.22807	0.97619	0.285714	-0.225806	-0.846154	-0.0357143	0.577465
										0.853659	-0.0105263	-0.866667	0.82906	0.894737	-0.666667	0.333333	-0.16	-0.870968	0.649123	-0.226415	-0.2	-0.333333	-0.283582	0.487179	-0.936508	0.72973	0.657143	0.172043	0.358974	-0.5	-0.166667	-0.0508475	0.142857	0.511111	-0.647059	0.276596	-0.875	0.625	0	0	0.904762	0.43662	0.22807	0.97619	0.285714	-0.225806	-0.857143	-0.0357143	0.577465
										0.853659	-0.0105263	-0.866667	0.82906	0.894737	-0.666667	0.333333	-0.16	-0.870968	0.649123	-0.226415	-0.2	-0.333333	-0.294118	0.487179	-0.936508	0.72973	0.657143	0.172043	0.358974	-0.647059	-0.166667	-0.0508475	0.142857	0.511111	-0.647059	0.276596	-0.875	0.625	0	0	0.904762	0.43662	0.22807	0.97619	0.285714	-0.225806	-0.857143	-0.0357143	0.577465
										0.853659	-0.0105263	-0.866667	0.82906	0.894737	-0.666667	0.333333	-0.16	-0.870968	0.649123	-0.226415	-0.2	-0.333333	-0.304348	0.487179	-0.936508	0.72973	0.657143	0.172043	0.358974	-0.666667	-0.166667	-0.0508475	0.142857	0.511111	-0.647059	0.276596	-0.875	0.625	0	0	0.904762	0.43662	0.22807	0.97619	0.285714	-0.225806	-0.857143	-0.0357143	0.577465
										0.853659	-0.0105263	-0.866667	0.82906	0.894737	-0.666667	0.333333	-0.16	-0.870968	0.649123	-0.226415	-0.2	-0.333333	-0.315682	0.487179	-0.936508	0.72973	0.657143	0.172043	0.358974	-0.714286	-0.166667	-0.0508475	0.142857	0.511111	-0.647059	0.276596	-0.875	0.625	0	0	0.904762	0.43662	0.22807	0.97619	0.285714	-0.225806	-0.857143	-0.0357143	0.577465
										0.853659	-0.0105263	-0.866667	0.830508	0.894737	-0.666667	0.333333	-0.16	-0.870968	0.649123	-0.226415	-0.2	-0.333333	-0.318458	0.487179	-0.936508	0.72973	0.657143	0.172043	0.358974	-0.73913	-0.166667	-0.0508475	0.142857	0.511111	-0.647059	0.276596	-0.875	0.625	0	0	0.904762	0.43662	0.22807	0.97619	0.285714	-0.225806	-0.857143	-0.0357143	0.577465
										0.853659	-0.0105263	-0.866667	0.834711	0.894737	-0.666667	0.333333	-0.16	-0.870968	0.649123	-0.226415	-0.2	-0.333333	-0.319838	0.487179	-0.936508	0.72973	0.657143	0.172043	0.358974	-0.8	-0.166667	-0.164179	0.142857	0.511111	-0.647059	0.276596	-0.875	0.625	0	0	0.904762	0.43662	0.22807	0.97619	0.285714	-0.225806	-0.857143	-0.0357143	0.577465
										0.853659	-0.0105263	-0.866667	0.834711	0.894737	-0.666667	0.333333	-0.16	-0.870968	0.649123	-0.226415	-0.2	-0.333333	-0.319838	0.487179	-0.936508	0.72973	0.657143	0.172043	0.358974	-0.818182	-0.166667	-0.164179	0.142857	0.511111	-0.647059	0.276596	-0.875	0.653846	0	0	0.904762	0.43662	0.22807	0.97619	0.285714	-0.225806	-0.857143	-0.0357143	0.577465
										0.853659	-0.0505051	-0.866667	0.834711	0.894737	-0.666667	0.333333	-0.16	-0.870968	0.649123	-0.226415	-0.2	-0.333333	-0.319838	0.487179	-0.936508	0.72973	0.526316	0.172043	0.358974	-0.823529	-0.166667	-0.164179	0.142857	0.511111	-0.647059	0.276596	-0.875	0.678571	0	0	0.904762	0.43662	0.22807	0.97619	0.285714	-0.225806	-0.857143	-0.0357143	0.577465
										0.853659	-0.0693069	-0.866667	0.834711	0.894737	-0.666667	0.333333	-0.16	-0.870968	0.649123	-0.226415	-0.2	-0.333333	-0.319838	0.487179	-0.936508	0.72973	0.380952	0.172043	0.358974	-0.823529	-0.166667	-0.176471	0.142857	0.511111	-0.647059	0.276596	-0.875	0.735294	0	0	0.904762	0.43662	0.22807	0.97619	0.285714	-0.225806	-0.857143	-0.0357143	0.577465
										0.853659	-0.0784314	-0.866667	0.834711	0.894737	-0.666667	0.333333	-0.16	-0.870968	0.649123	-0.226415	-0.2	-0.333333	-0.319838	0.487179	-0.936508	0.72973	0.234043	0.172043	0.358974	-0.823529	-0.166667	-0.176471	0.142857	0.511111	-0.647059	0.276596	-0.875	0.735294	0	0	0.904762	0.43662	0.22807	0.97619	0.285714	-0.225806	-0.857143	-0.0357143	0.577465
										0.853659	-0.113208	-0.866667	0.834711	0.894737	-0.666667	0.333333	-0.16	-0.870968	0.649123	-0.226415	-0.2	-0.333333	-0.319838	0.487179	-0.936508	0.72973	0.234043	0.172043	0.358974	-0.823529	-0.166667	-0.176471	0.142857	0.511111	-0.647059	0.276596	-0.875	0.73913	0	0	0.904762	0.43662	0.22807	0.97619	0.285714	-0.225806	-0.857143	-0.0357143	0.577465
										0.853659	-0.12963	-0.866667	0.834711	0.894737	-0.666667	0.333333	-0.16	-0.870968	0.649123	-0.226415	-0.2	-0.333333	-0.319838	0.487179	-0.936508	0.72973	0.208333	0.172043	0.358974	-0.823529	-0.166667	-0.176471	0.142857	0.511111	-0.647059	0.276596	-0.875	0.73913	0	0	0.904762	0.43662	0.22807	0.97619	0.285714	-0.225806	-0.857143	-0.0357143	0.577465
										0.853659	-0.145454	-0.866667	0.834711	0.894737	-0.666667	0.333333	-0.16	-0.870968	0.649123	-0.226415	-0.2	-0.333333	-0.319838	0.487179	-0.936508	0.72973	0.208333	0.172043	0.358974	-0.823529	-0.166667	-0.176471	0.142857	0.511111	-0.647059	0.276596	-0.875	0.73913	0	0	0.904762	0.43662	0.22807	0.97619	0.285714	-0.225806	-0.857143	-0.0357143	0.577465
										0.853659	-0.145454	-0.866667	0.834711	0.894737	-0.666667	0.333333	-0.16	-0.870968	0.649123	-0.226415	-0.2	-0.333333	-0.319838	0.487179	-0.936508	0.72973	0.208333	0.172043	0.358974	-0.823529	-0.166667	-0.176471	0.142857	0.511111	-0.647059	0.276596	-0.875	0.73913	0	0	0.904762	0.43662	0.22807	0.97619	0.285714	-0.225806	-0.857143	-0.0357143	0.577465
										0.853659	-0.153153	-0.866667	0.834711	0.894737	-0.666667	0.333333	-0.16	-0.870968	0.649123	-0.226415	-0.2	-0.333333	-0.319838	0.487179	-0.936508	0.72973	0.208333	0.172043	0.358974	-0.823529	-0.166667	-0.176471	0.142857	0.511111	-0.647059	0.276596	-0.875	0.73913	0	0	0.904762	0.43662	0.22807	0.97619	0.285714	-0.225806	-0.857143	-0.0357143	0.577465
										0.853659	-0.153153	-0.866667	0.837398	0.894737	-0.666667	0.333333	-0.16	-0.870968	0.649123	-0.226415	-0.2	-0.333333	-0.319838	0.487179	-0.936508	0.72973	0.208333	0.172043	0.358974	-0.823529	-0.166667	-0.176471	0.142857	0.511111	-0.647059	0.276596	-0.875	0.73913	0	0	0.904762	0.43662	0.22807	0.97619	0.285714	-0.225806	-0.857143	-0.0357143	0.577465
										0.853659	-0.153153	-0.866667	0.83871	0.894737	-0.666667	0.333333	-0.16	-0.870968	0.649123	-0.226415	-0.2	-0.333333	-0.319838	0.487179	-0.936508	0.72973	0.208333	0.172043	0.358974	-0.823529	-0.166667	-0.176471	0.142857	0.511111	-0.647059	0.276596	-0.875	0.73913	0	0	0.904762	0.43662	0.22807	0.97619	0.285714	-0.225806	-0.857143	-0.0357143	0.577465
										0.853659	-0.153153	-0.866667	0.84127	0.894737	-0.666667	0.333333	-0.16	-0.870968	0.649123	-0.226415	-0.2	-0.333333	-0.319838	0.487179	-0.936508	0.72973	0.208333	0.172043	0.358974	-0.823529	-0.166667	-0.176471	0.142857	0.511111	-0.647059	0.276596	-0.875	0.73913	0	0	0.904762	0.43662	0.22807	0.97619	0.285714	-0.225806	-0.857143	-0.0357143	0.577465
										0.853659	-0.153153	-0.866667	0.84252	0.894737	-0.666667	0.333333	-0.16	-0.870968	0.649123	-0.226415	-0.2	-0.333333	-0.319838	0.487179	-0.936508	0.72973	0.208333	0.172043	0.358974	-0.823529	-0.166667	-0.176471	0.142857	0.511111	-0.647059	0.276596	-0.875	0.73913	0	0	0.904762	0.43662	0.22807	0.97619	0.285714	-0.225806	-0.857143	-0.0357143	0.577465
										0.853659	-0.153153	-0.866667	0.846154	0.894737	-0.666667	0.333333	-0.16	-0.870968	0.649123	-0.226415	-0.2	-0.333333	-0.319838	0.487179	-0.936508	0.72973	0.208333	0.172043	0.358974	-0.823529	-0.166667	-0.176471	0.142857	0.511111	-0.647059	0.276596	-0.875	0.73913	0	0	0.904762	0.43662	0.22807	0.97619	0.285714	-0.225806	-0.857143	-0.0357143	0.577465
										0.853659	-0.153153	-0.866667	0.849624	0.894737	-0.666667	0.333333	-0.16	-0.870968	0.649123	-0.226415	-0.2	-0.333333	-0.319838	0.487179	-0.936508	0.72973	0.208333	0.172043	0.358974	-0.823529	-0.166667	-0.176471	0.142857	0.511111	-0.647059	0.276596	-0.875	0.73913	0	0	0.904762	0.43662	0.22807	0.97619	0.285714	-0.225806	-0.857143	-0.0357143	0.577465
										0.853659	-0.153153	-0.866667	0.849624	0.894737	-0.666667	0.333333	-0.16	-0.870968	0.649123	-0.226415	-0.2	-0.333333	-0.319838	0.487179	-0.936508	0.72973	0.208333	0.172043	0.358974	-0.823529	-0.166667	-0.176471	0.142857	0.511111	-0.647059	0.276596	-0.875	0.73913	0	0	0.904762	0.43662	0.22807	0.97619	0.285714	-0.225806	-0.857143	-0.0357143	0.577465
										0.853659	-0.153153	-0.866667	0.849624	0.894737	-0.666667	0.333333	-0.16	-0.870968	0.649123	-0.226415	-0.2	-0.333333	-0.319838	0.487179	-0.936508	0.72973	0.208333	0.172043	0.358974	-0.823529	-0.166667	-0.176471	0.142857	0.511111	-0.647059	0.276596	-0.875	0.73913	0	0	0.904762	0.43662	0.22807	0.97619	0.285714	-0.225806	-0.857143	-0.0357143	0.577465
										0.853659	-0.153153	-0.866667	0.849624	0.894737	-0.666667	0.333333	-0.16	-0.870968	0.649123	-0.226415	-0.2	-0.333333	-0.319838	0.487179	-0.936508	0.72973	0.208333	0.172043	0.358974	-0.823529	-0.166667	-0.176471	0.142857	0.511111	-0.647059	0.276596	-0.875	0.73913	0	0	0.904762	0.43662	0.22807	0.97619	0.285714	-0.225806	-0.857143	-0.0357143	0.577465
										0.853659	-0.153153	-0.866667	0.849624	0.894737	-0.666667	0.333333	-0.16	-0.870968	0.649123	-0.226415	-0.2	-0.333333	-0.319838	0.487179	-0.936508	0.72973	0.208333	0.172043	0.358974	-0.823529	-0.166667	-0.176471	0.142857	0.511111	-0.647059	0.276596	-0.875	0.73913	0	0	0.904762	0.43662	0.22807	0.97619	0.285714	-0.25	-0.857143	-0.0357143	0.577465
										0.853659	-0.153153	-0.866667	0.849624	0.894737	-0.666667	0.333333	-0.16	-0.870968	0.649123	-0.226415	-0.2	-0.333333	-0.319838	0.487179	-0.936508	0.72973	0.208333	0.172043	0.358974	-0.823529	-0.166667	-0.176471	0.142857	0.511111	-0.647059	0.276596	-0.875	0.73913	0	0	0.904762	0.43662	0.22807	0.97619	0.285714	-0.25	-0.857143	-0.0357143	0.577465
										0.853659	-0.153153	-0.866667	0.850746	0.894737	-0.666667	0.333333	-0.16	-0.870968	0.649123	-0.226415	-0.2	-0.333333	-0.319838	0.487179	-0.936508	0.72973	0.208333	0.172043	0.358974	-0.823529	-0.166667	-0.176471	0.142857	0.511111	-0.647059	0.276596	-0.875	0.73913	0	0	0.904762	0.43662	0.22807	0.97619	0.285714	-0.25	-0.857143	-0.0357143	0.577465
										0.853659	-0.153153	-0.866667	0.851852	0.894737	-0.666667	0.333333	-0.16	-0.870968	0.649123	-0.226415	-0.2	-0.333333	-0.319838	0.487179	-0.936508	0.72973	0.208333	0.172043	0.325	-0.823529	-0.166667	-0.176471	0.142857	0.56	-0.647059	0.276596	-0.875	0.73913	0	0	0.904762	0.43662	0.22807	0.97619	0.285714	-0.25	-0.857143	-0.0357143	0.577465
										0.853659	-0.153153	-0.866667	0.852941	0.894737	-0.666667	0.333333	-0.16	-0.870968	0.649123	-0.226415	-0.2	-0.333333	-0.328	0.487179	-0.936508	0.72973	0.208333	0.172043	0.277108	-0.823529	-0.166667	-0.176471	0.142857	0.568627	-0.647059	0.276596	-0.875	0.73913	0	0	0.904762	0.43662	0.22807	0.97619	0.285714	-0.25	-0.857143	-0.0357143	0.577465
										0.853659	-0.153153	-0.866667	0.852941	0.894737	-0.666667	0.333333	-0.16	-0.870968	0.649123	-0.226415	-0.2	-0.333333	-0.333333	0.487179	-0.936508	0.72973	0.208333	0.172043	0.277108	-0.823529	-0.166667	-0.176471	0.142857	0.607143	-0.647059	0.276596	-0.875	0.73913	0	0	0.904762	0.43662	0.22807	0.97619	0.285714	-0.25	-0.857143	-0.0357143	0.577465
										0.853659	-0.153153	-0.866667	0.855072	0.894737	-0.666667	0.333333	-0.16	-0.870968	0.649123	-0.226415	-0.2	-0.333333	-0.333333	0.487179	-0.936508	0.72973	0.208333	0.172043	0.277108	-0.823529	-0.166667	-0.176471	0.142857	0.627119	-0.647059	0.276596	-0.875	0.73913	0	0	0.904762	0.43662	0.22807	0.97619	0.285714	-0.25	-0.857143	-0.0357143	0.577465
										0.853659	-0.153153	-0.866667	0.855072	0.894737	-0.666667	0.333333	-0.16	-0.870968	0.649123	-0.226415	-0.2	-0.333333	-0.334653	0.487179	-0.936508	0.72973	0.208333	0.172043	0.277108	-0.823529	-0.166667	-0.176471	0.142857	0.627119	-0.647059	0.276596	-0.875	0.73913	0	0	0.904762	0.43662	0.22807	0.976471	0.285714	-0.25	-0.857143	-0.0357143	0.577465
										0.853659	-0.153153	-0.866667	0.857143	0.894737	-0.666667	0.333333	-0.16	-0.870968	0.649123	-0.226415	-0.2	-0.333333	-0.334653	0.487179	-0.936508	0.72973	0.208333	0.172043	0.277108	-0.823529	-0.166667	-0.176471	0.142857	0.627119	-0.647059	0.276596	-0.875	0.690141	0	0	0.904762	0.43662	0.22807	0.979167	0.285714	-0.25	-0.857143	-0.0357143	0.577465
										0.853659	-0.153153	-0.866667	0.857143	0.894737	-0.666667	0.333333	-0.16	-0.870968	0.649123	-0.226415	-0.2	-0.333333	-0.334653	0.487179	-0.936508	0.72973	0.208333	0.172043	0.277108	-0.823529	-0.166667	-0.176471	0.142857	0.627119	-0.647059	0.276596	-0.875	0.538462	0	0	0.904762	0.43662	0.22807	0.979798	0.285714	-0.25	-0.857143	-0.0357143	0.577465
										0.853659	-0.153153	-0.866667	0.858156	0.894737	-0.666667	0.333333	-0.16	-0.870968	0.649123	-0.226415	-0.2	-0.333333	-0.334653	0.487179	-0.936508	0.72973	0.208333	0.172043	0.277108	-0.823529	-0.166667	-0.176471	0.142857	0.627119	-0.647059	0.276596	-0.875	0.538462	0	0	0.904762	0.43662	0.22807	0.979798	0.285714	-0.25	-0.857143	-0.0357143	0.577465
										0.853659	-0.153153	-0.866667	0.862069	0.894737	-0.666667	0.333333	-0.16	-0.870968	0.649123	-0.226415	-0.2	-0.333333	-0.334653	0.487179	-0.936508	0.72973	0.208333	0.172043	0.277108	-0.823529	-0.166667	-0.176471	0.142857	0.627119	-0.647059	0.276596	-0.875	0.538462	0	0	0.904762	0.43662	0.22807	0.979798	0.285714	-0.25	-0.857143	-0.0357143	0.577465
										0.853659	-0.153153	-0.866667	0.864865	0.894737	-0.666667	0.333333	-0.16	-0.870968	0.649123	-0.226415	-0.2	-0.333333	-0.334653	0.487179	-0.936508	0.72973	0.208333	0.172043	0.277108	-0.823529	-0.166667	-0.176471	0.142857	0.627119	-0.647059	0.276596	-0.875	0.518987	0	0	0.904762	0.43662	0.22807	0.979798	0.285714	-0.25	-0.857143	-0.0357143	0.577465
										0.853659	-0.153153	-0.866667	0.86755	0.894737	-0.666667	0.333333	-0.16	-0.870968	0.649123	-0.226415	-0.2	-0.333333	-0.334653	0.487179	-0.936508	0.72973	0.208333	0.172043	0.277108	-0.823529	-0.166667	-0.176471	0.142857	0.627119	-0.647059	0.276596	-0.875	0.518987	0	0	0.904762	0.43662	0.22807	0.979798	0.285714	-0.25	-0.857143	-0.0357143	0.577465
										0.853659	-0.153153	-0.866667	0.87013	0.894737	-0.666667	0.333333	-0.16	-0.870968	0.649123	-0.226415	-0.2	-0.333333	-0.334653	0.487179	-0.936508	0.72973	0.208333	0.172043	0.277108	-0.823529	-0.166667	-0.176471	0.142857	0.627119	-0.647059	0.276596	-0.875	0.518987	0	0	0.904762	0.43662	0.22807	0.979798	0.285714	-0.25	-0.857143	-0.0357143	0.577465
										0.853659	-0.153153	-0.866667	0.874214	0.894737	-0.666667	0.333333	-0.16	-0.870968	0.649123	-0.226415	-0.2	-0.333333	-0.334653	0.487179	-0.936508	0.72973	0.208333	0.172043	0.277108	-0.823529	-0.166667	-0.176471	0.142857	0.627119	-0.647059	0.276596	-0.875	0.518987	0	0	0.904762	0.43662	0.22807	0.979798	0.285714	-0.25	-0.857143	-0.0357143	0.577465
										0.853659	-0.153153	-0.866667	0.877301	0.894737	-0.666667	0.333333	-0.16	-0.870968	0.649123	-0.226415	-0.2	-0.333333	-0.334653	0.487179	-0.936508	0.72973	0.208333	0.172043	0.277108	-0.823529	-0.166667	-0.176471	0.142857	0.627119	-0.647059	0.276596	-0.875	0.395349	0	0	0.904762	0.43662	0.22807	0.979798	0.285714	-0.25	-0.857143	-0.0357143	0.577465
										0.853659	-0.153153	-0.866667	0.883041	0.894737	-0.666667	0.333333	-0.16	-0.870968	0.649123	-0.226415	-0.2	-0.333333	-0.334653	0.487179	-0.936508	0.72973	0.208333	0.172043	0.277108	-0.823529	-0.166667	-0.176471	0.142857	0.627119	-0.647059	0.276596	-0.875	0.318681	0	0	0.904762	0.43662	0.22807	0.979798	0.285714	-0.25	-0.857143	-0.0357143	0.577465
										0.853659	-0.153153	-0.866667	0.883041	0.894737	-0.666667	0.333333	-0.16	-0.870968	0.649123	-0.226415	-0.2	-0.333333	-0.334653	0.487179	-0.936508	0.72973	0.208333	0.172043	0.277108	-0.823529	-0.166667	-0.176471	0.142857	0.627119	-0.647059	0.276596	-0.875	0.318681	0	0	0.904762	0.43662	0.22807	0.979798	0.285714	-0.25	-0.857143	-0.0357143	0.577465
										0.853659	-0.153153	-0.866667	0.883721	0.894737	-0.666667	0.333333	-0.16	-0.870968	0.649123	-0.226415	-0.2	-0.333333	-0.334653	0.487179	-0.936508	0.72973	0.208333	0.172043	0.277108	-0.823529	-0.166667	-0.176471	0.142857	0.627119	-0.647059	0.276596	-0.875	0.304348	0	0	0.904762	0.43662	0.22807	0.979798	0.285714	-0.25	-0.857143	-0.0357143	0.577465
										0.853659	-0.153153	-0.866667	0.883721	0.894737	-0.666667	0.333333	-0.16	-0.870968	0.649123	-0.226415	-0.2	-0.333333	-0.334653	0.487179	-0.936508	0.72973	0.208333	0.172043	0.277108	-0.823529	-0.166667	-0.176471	0.142857	0.627119	-0.647059	0.276596	-0.875	0.304348	0	0	0.904762	0.43662	0.22807	0.979798	0.285714	-0.25	-0.857143	-0.0357143	0.577465
										0.853659	-0.153153	-0.866667	0.883721	0.894737	-0.666667	0.333333	-0.16	-0.870968	0.649123	-0.226415	-0.2	-0.333333	-0.334653	0.487179	-0.936508	0.72973	0.208333	0.172043	0.277108	-0.823529	-0.166667	-0.176471	0.142857	0.627119	-0.647059	0.276596	-0.875	0.304348	0	0	0.904762	0.43662	0.22807	0.979798	0.285714	-0.25	-0.857143	-0.0357143	0.577465
										0.853659	-0.153153	-0.866667	0.883721	0.894737	-0.666667	0.333333	-0.16	-0.870968	0.649123	-0.226415	-0.2	-0.333333	-0.334653	0.487179	-0.936508	0.72973	0.208333	0.172043	0.277108	-0.823529	-0.166667	-0.176471	0.142857	0.627119	-0.647059	0.276596	-0.875	0.304348	0	0	0.904762	0.43662	0.22807	0.979798	0.285714	-0.25	-0.857143	-0.0357143	0.577465
										0.853659	-0.153153	-0.866667	0.883721	0.894737	-0.666667	0.333333	-0.16	-0.870968	0.649123	-0.226415	-0.2	-0.333333	-0.334653	0.487179	-0.936508	0.72973	0.208333	0.172043	0.277108	-0.823529	-0.166667	-0.176471	0.142857	0.627119	-0.647059	0.276596	-0.875	0.304348	0	0	0.904762	0.43662	0.22807	0.979798	0.285714	-0.25	-0.866667	-0.0357143	0.577465
										0.853659	-0.153153	-0.866667	0.883721	0.894737	-0.666667	0.333333	-0.16	-0.870968	0.649123	-0.226415	-0.2	-0.333333	-0.334653	0.487179	-0.936508	0.72973	0.208333	0.172043	0.277108	-0.823529	-0.166667	-0.176471	0.142857	0.627119	-0.647059	0.276596	-0.875	0.304348	0	0	0.904762	0.43662	0.22807	0.979798	0.285714	-0.25	-0.866667	-0.0357143	0.577465
										0.853659	-0.153153	-0.866667	0.883721	0.894737	-0.666667	0.333333	-0.16	-0.870968	0.649123	-0.226415	-0.2	-0.333333	-0.34375	0.487179	-0.936508	0.72973	0.208333	0.172043	0.277108	-0.823529	-0.166667	-0.0810811	0.142857	0.627119	-0.647059	0.276596	-0.875	0.304348	0	0	0.904762	0.43662	0.22807	0.979798	0.285714	-0.25	-0.866667	-0.0357143	0.577465
										0.853659	-0.153153	-0.866667	0.883721	0.894737	-0.666667	0.333333	-0.16	-0.870968	0.649123	-0.226415	-0.2	-0.333333	-0.348837	0.487179	-0.936508	0.72973	0.208333	0.172043	0.277108	-0.823529	-0.166667	0	0.142857	0.627119	-0.647059	0.276596	-0.875	0.304348	0	0	0.904762	0.43662	0.22807	0.979798	0.285714	-0.25	-0.866667	-0.0357143	0.577465
										0.853659	-0.153153	-0.866667	0.883721	0.894737	-0.666667	0.333333	-0.16	-0.870968	0.649123	-0.226415	-0.2	-0.333333	-0.348837	0.487179	-0.936508	0.72973	0.208333	0.185185	0.277108	-0.823529	-0.166667	0.0361446	0.142857	0.627119	-0.647059	0.276596	-0.875	0.304348	0	0	0.904762	0.43662	0.22807	0.979798	0.285714	-0.25	-0.866667	-0.0357143	0.577465
										0.853659	-0.153153	-0.866667	0.883721	0.894737	-0.666667	0.333333	-0.16	-0.870968	0.649123	-0.226415	-0.2	-0.333333	-0.350097	0.487179	-0.936508	0.72973	0.208333	0.202073	0.277108	-0.823529	-0.166667	0.175258	0.142857	0.627119	-0.647059	0.276596	-0.875	0.304348	0	0	0.904762	0.43662	0.22807	0.979798	0.285714	-0.25	-0.866667	-0.0357143	0.577465
										0.853659	-0.153153	-0.866667	0.886364	0.894737	-0.666667	0.333333	-0.16	-0.870968	0.649123	-0.226415	-0.2	-0.333333	-0.350097	0.487179	-0.936508	0.72973	0.208333	0.233831	0.277108	-0.823529	-0.166667	0.175258	0.142857	0.627119	-0.647059	0.276596	-0.875	0.304348	0	0	0.904762	0.43662	0.22807	0.979798	0.285714	-0.25	-0.866667	-0.0357143	0.577465
										0.853659	-0.153153	-0.866667	0.888268	0.894737	-0.666667	0.333333	-0.16	-0.870968	0.649123	-0.226415	-0.2	-0.333333	-0.350097	0.487179	-0.936508	0.72973	0.208333	0.237624	0.277108	-0.823529	-0.166667	0.183673	0.142857	0.627119	-0.647059	0.276596	-0.875	0.304348	0	0	0.904762	0.43662	0.22807	0.979798	0.285714	-0.25	-0.866667	-0.0357143	0.577465
										0.853659	-0.153153	-0.866667	0.891304	0.894737	-0.666667	0.333333	-0.16	-0.870968	0.649123	-0.226415	-0.2	-0.333333	-0.350097	0.487179	-0.936508	0.72973	0.208333	0.241379	0.277108	-0.823529	-0.166667	0.183673	0.142857	0.627119	-0.647059	0.276596	-0.875	0.304348	0	0	0.904762	0.43662	0.22807	0.979798	0.285714	-0.25	-0.866667	-0.0357143	0.577465
										0.853659	-0.153153	-0.866667	0.893617	0.894737	-0.666667	0.333333	-0.16	-0.870968	0.649123	-0.226415	-0.2	-0.333333	-0.350097	0.487179	-0.936508	0.72973	0.208333	0.241379	0.277108	-0.823529	-0.166667	0.183673	0.142857	0.627119	-0.647059	0.276596	-0.875	0.304348	0	0	0.904762	0.43662	0.22807	0.979798	0.285714	-0.25	-0.866667	-0.0357143	0.577465
										0.853659	-0.153153	-0.866667	0.893617	0.894737	-0.666667	0.333333	-0.16	-0.870968	0.649123	-0.226415	-0.2	-0.333333	-0.350097	0.487179	-0.936508	0.72973	0.208333	0.241379	0.277108	-0.823529	-0.166667	0.183673	0.142857	0.627119	-0.647059	0.276596	-0.875	0.304348	0	0	0.904762	0.43662	0.22807	0.979798	0.285714	-0.25	-0.866667	-0.0357143	0.577465
										0.853659	-0.153153	-0.866667	0.895833	0.894737	-0.666667	0.333333	-0.16	-0.870968	0.649123	-0.226415	-0.2	-0.333333	-0.350097	0.487179	-0.936508	0.72973	0.208333	0.235294	0.277108	-0.823529	-0.166667	0.183673	0.142857	0.627119	-0.647059	0.276596	-0.875	0.304348	0	0	0.904762	0.43662	0.22807	0.979798	0.285714	-0.25	-0.866667	-0.0357143	0.577465
										0.853659	-0.153153	-0.866667	0.89899	0.894737	-0.666667	0.333333	-0.16	-0.870968	0.649123	-0.226415	-0.2	-0.333333	-0.350097	0.487179	-0.936508	0.72973	0.208333	0.223301	0.277108	-0.823529	-0.166667	0.183673	0.142857	0.627119	-0.647059	0.276596	-0.875	0.304348	0	0	0.904762	0.43662	0.22807	0.979798	0.285714	-0.25	-0.866667	-0.0357143	0.577465
										0.853659	-0.153153	-0.866667	0.90099	0.894737	-0.666667	0.333333	-0.16	-0.870968	0.649123	-0.226415	-0.2	-0.333333	-0.350097	0.487179	-0.876923	0.72973	0.208333	0.223301	0.277108	-0.823529	-0.166667	0.183673	0.142857	0.627119	-0.647059	0.276596	-0.875	0.304348	0	0	0.904762	0.43662	0.22807	0.979798	0.285714	-0.25	-0.866667	-0.0357143	0.577465
										0.853659	-0.153153	-0.866667	0.902913	0.894737	-0.666667	0.333333	-0.16	-0.870968	0.649123	-0.226415	-0.2	-0.333333	-0.350097	0.487179	-0.848485	0.72973	0.208333	0.223301	0.277108	-0.823529	-0.166667	0.183673	0.142857	0.627119	-0.647059	0.276596	-0.875	0.304348	0	0	0.904762	0.43662	0.22807	0.979798	0.285714	-0.25	-0.866667	-0.0357143	0.577465
										0.853659	-0.153153	-0.866667	0.903382	0.894737	-0.666667	0.333333	-0.16	-0.870968	0.649123	-0.226415	-0.2	-0.333333	-0.350097	0.487179	-0.848485	0.72973	0.208333	0.223301	0.277108	-0.823529	-0.166667	0.183673	0.142857	0.627119	-0.647059	0.276596	-0.875	0.304348	0	0	0.904762	0.43662	0.22807	0.979798	0.285714	-0.25	-0.875	-0.0357143	0.577465
										0.853659	-0.153153	-0.866667	0.903382	0.894737	-0.666667	0.333333	-0.16	-0.870968	0.649123	-0.226415	-0.2	-0.333333	-0.34749	0.487179	-0.848485	0.72973	0.208333	0.223301	0.277108	-0.823529	-0.166667	0.183673	0.142857	0.627119	-0.647059	0.276596	-0.875	0.304348	0	0	0.904762	0.43662	0.22807	0.979798	0.285714	-0.25	-0.875	-0.0357143	0.577465
										0.853659	-0.153153	-0.866667	0.903382	0.894737	-0.666667	0.333333	-0.16	-0.870968	0.649123	-0.226415	-0.2	-0.333333	-0.334608	0.487179	-0.848485	0.72973	0.208333	0.223301	0.333333	-0.823529	-0.166667	0.183673	0.142857	0.627119	-0.647059	0.276596	-0.875	0.304348	0	0	0.904762	0.43662	0.22807	0.979798	0.285714	-0.25	-0.875	-0.0357143	0.577465
										0.853659	-0.153153	-0.866667	0.903382	0.894737	-0.666667	0.333333	-0.16	-0.870968	0.649123	-0.226415	-0.2	-0.333333	-0.32197	0.487179	-0.848485	0.72973	0.208333	0.223301	0.361702	-0.823529	-0.166667	0.183673	0.142857	0.627119	-0.647059	0.276596	-0.875	0.304348	0	0	0.904762	0.43662	0.22807	0.979798	0.285714	-0.25	-0.875	-0.0357143	0.577465
										0.853659	-0.153153	-0.866667	0.903382	0.894737	-0.666667	0.333333	-0.16	-0.870968	0.649123	-0.226415	-0.2	-0.333333	-0.316981	0.487179	-0.848485	0.72973	0.208333	0.223301	0.381443	-0.823529	-0.166667	0.183673	0.142857	0.627119	-0.647059	0.276596	-0.875	0.304348	0	0	0.904762	0.43662	0.22807	0.979798	0.285714	-0.25	-0.875	-0.0357143	0.577465
										0.853659	-0.153153	-0.866667	0.903382	0.894737	-0.666667	0.333333	-0.16	-0.870968	0.649123	-0.226415	-0.2	-0.333333	-0.314501	0.487179	-0.848485	0.72973	0.208333	0.223301	0.439252	-0.823529	-0.166667	0.183673	0.142857	0.627119	-0.647059	0.276596	-0.875	0.304348	0	0	0.904762	0.43662	0.22807	0.979798	0.285714	-0.25	-0.875	-0.0357143	0.577465
										0.853659	-0.153153	-0.866667	0.903382	0.894737	-0.666667	0.333333	-0.16	-0.870968	0.649123	-0.226415	-0.2	-0.333333	-0.309569	0.487179	-0.848485	0.72973	0.208333	0.223301	0.439252	-0.823529	-0.0769231	0.183673	0.142857	0.627119	-0.647059	0.276596	-0.875	0.304348	0	0	0.904762	0.43662	0.22807	0.979798	0.285714	-0.25	-0.875	-0.0357143	0.577465
										0.853659	-0.153153	-0.866667	0.903382	0.894737	-0.666667	0.333333	-0.16	-0.870968	0.649123	-0.226415	-0.2	-0.333333	-0.309569	0.487179	-0.848485	0.72973	0.208333	0.223301	0.444445	-0.823529	-0.0769231	0.183673	0.142857	0.627119	-0.647059	0.276596	-0.875	0.304348	0	0	0.904762	0.43662	0.22807	0.979798	0.285714	-0.25	-0.875	-0.0357143	0.577465
										0.853659	-0.153153	-0.866667	0.903382	0.894737	-0.666667	0.333333	-0.16	-0.870968	0.649123	-0.226415	-0.2	-0.333333	-0.309569	0.487179	-0.848485	0.72973	0.208333	0.223301	0.444445	-0.823529	-0.0769231	0.183673	0.142857	0.627119	-0.647059	0.276596	-0.875	0.304348	0	0	0.904762	0.43662	0.22807	0.979798	0.285714	-0.25	-0.875	-0.0357143	0.577465
										0.853659	-0.153153	-0.866667	0.903382	0.894737	-0.666667	0.333333	-0.16	-0.870968	0.649123	-0.226415	-0.2	-0.333333	-0.309569	0.487179	-0.848485	0.72973	0.208333	0.223301	0.444445	-0.823529	-0.0769231	0.183673	0.142857	0.627119	-0.647059	0.276596	-0.875	0.304348	0	0	0.904762	0.43662	0.22807	0.979798	0.285714	-0.25	-0.875	-0.0357143	0.577465
										0.853659	-0.153153	-0.866667	0.903382	0.894737	-0.666667	0.333333	-0.16	-0.870968	0.649123	-0.226415	-0.2	-0.333333	-0.309569	0.487179	-0.848485	0.72973	0.208333	0.223301	0.444445	-0.823529	-0.0769231	0.183673	0.142857	0.627119	-0.647059	0.276596	-0.875	0.304348	0	0	0.904762	0.43662	0.22807	0.979798	0.285714	-0.25	-0.875	-0.0357143	0.577465
										0.853659	-0.153153	-0.866667	0.903382	0.894737	-0.666667	0.333333	-0.16	-0.870968	0.649123	-0.226415	-0.2	-0.333333	-0.309569	0.487179	-0.848485	0.72973	0.208333	0.223301	0.444445	-0.823529	-0.0769231	0.183673	0.142857	0.627119	-0.647059	0.276596	-0.875	0.304348	0	0	0.904762	0.43662	0.22807	0.979798	0.285714	-0.25	-0.875	-0.0357143	0.577465
										0.853659	-0.153153	-0.866667	0.903382	0.894737	-0.666667	0.333333	-0.16	-0.870968	0.649123	-0.226415	-0.2	-0.333333	-0.309569	0.487179	-0.848485	0.72973	0.208333	0.223301	0.444445	-0.823529	-0.0769231	0.183673	0.142857	0.627119	-0.647059	0.276596	-0.875	0.304348	0	0	0.904762	0.43662	0.22807	0.979798	0.285714	-0.25	-0.875	-0.0357143	0.577465
										0.853659	-0.153153	-0.866667	0.903382	0.894737	-0.666667	0.333333	-0.16	-0.870968	0.649123	-0.226415	-0.2	-0.333333	-0.309569	0.487179	-0.848485	0.72973	0.208333	0.223301	0.444445	-0.823529	-0.0769231	0.183673	0.142857	0.627119	-0.647059	0.276596	-0.875	0.304348	0	0	0.904762	0.43662	0.22807	0.979798	0.285714	-0.25	-0.875	-0.0357143	0.577465
										0.853659	-0.153153	-0.866667	0.903382	0.894737	-0.666667	0.333333	-0.16	-0.870968	0.649123	-0.226415	-0.2	-0.333333	-0.309569	0.487179	-0.848485	0.72973	0.208333	0.223301	0.444445	-0.823529	-0.0769231	0.183673	0.142857	0.627119	-0.647059	0.276596	-0.875	0.304348	0	0	0.904762	0.43662	0.22807	0.979798	0.285714	-0.25	-0.875	-0.0357143	0.577465
										0.853659	-0.153153	-0.866667	0.903382	0.894737	-0.666667	0.333333	-0.16	-0.870968	0.62069	-0.226415	-0.2	-0.333333	-0.309569	0.487179	-0.848485	0.72973	0.208333	0.223301	0.444445	-0.823529	-0.0769231	0.183673	0.142857	0.627119	-0.647059	0.276596	-0.875	0.304348	0	0	0.904762	0.43662	0.22807	0.979798	0.285714	-0.25	-0.875	-0.0357143	0.577465
										0.853659	-0.153153	-0.866667	0.903382	0.894737	-0.666667	0.333333	-0.16	-0.870968	0.62069	-0.226415	-0.2	-0.333333	-0.309569	0.487179	-0.848485	0.72973	0.208333	0.223301	0.444445	-0.823529	-0.0769231	0.183673	0.142857	0.627119	-0.647059	0.276596	-0.875	0.304348	0	0	0.904762	0.43662	0.22807	0.979798	0.285714	-0.25	-0.875	-0.0357143	0.577465
										0.853659	-0.153153	-0.866667	0.903382	0.894737	-0.666667	0.333333	-0.16	-0.870968	0.62069	-0.226415	-0.2	-0.333333	-0.309569	0.487179	-0.848485	0.72973	0.208333	0.223301	0.444445	-0.823529	-0.0769231	0.183673	0.142857	0.627119	-0.647059	0.276596	-0.875	0.304348	0	0	0.904762	0.43662	0.22807	0.979798	0.285714	-0.272727	-0.875	-0.0357143	0.577465
										0.853659	-0.153153	-0.866667	0.903382	0.894737	-0.666667	0.333333	-0.16	-0.870968	0.62069	-0.226415	-0.2	-0.333333	-0.309569	0.487179	-0.848485	0.72973	0.208333	0.223301	0.444445	-0.823529	-0.0769231	0.183673	0.142857	0.627119	-0.647059	0.276596	-0.875	0.304348	0	0	0.904762	0.43662	0.22807	0.979798	0.285714	-0.272727	-0.875	-0.0357143	0.577465
										0.853659	-0.153153	-0.866667	0.903382	0.894737	-0.666667	0.333333	-0.16	-0.870968	0.62069	-0.226415	-0.2	-0.333333	-0.309569	0.487179	-0.848485	0.72973	0.208333	0.223301	0.444445	-0.823529	-0.0769231	0.183673	0.142857	0.627119	-0.647059	0.276596	-0.875	0.304348	0	0	0.904762	0.43662	0.22807	0.979798	0.285714	-0.272727	-0.875	-0.0357143	0.577465
										0.853659	-0.153153	-0.866667	0.903382	0.894737	-0.666667	0.333333	-0.16	-0.870968	0.62069	-0.226415	-0.2	-0.333333	-0.31215	0.487179	-0.820896	0.72973	0.208333	0.223301	0.444445	-0.823529	-0.0769231	0.183673	0.142857	0.627119	-0.647059	0.276596	-0.875	0.304348	0	0	0.904762	0.43662	0.22807	0.979798	0.285714	-0.272727	-0.875	-0.0357143	0.577465
										0.853659	-0.153153	-0.866667	0.903382	0.894737	-0.666667	0.333333	-0.16	-0.870968	0.62069	-0.226415	-0.2	-0.333333	-0.322284	0.487179	-0.820896	0.72973	0.208333	0.223301	0.444445	-0.823529	-0.0769231	0.183673	0.142857	0.627119	-0.647059	0.276596	-0.875	0.304348	0	0	0.904762	0.43662	0.22807	0.979798	0.285714	-0.272727	-0.875	-0.0357143	0.577465
										0.853659	-0.153153	-0.866667	0.903382	0.894737	-0.666667	0.333333	-0.16	-0.870968	0.62069	-0.226415	-0.2	-0.333333	-0.326007	0.487179	-0.820896	0.72973	0.208333	0.223301	0.418182	-0.823529	-0.0769231	0.183673	0.142857	0.627119	-0.647059	0.276596	-0.875	0.304348	0	0	0.904762	0.43662	0.22807	0.979798	0.285714	-0.272727	-0.875	-0.0357143	0.577465
										0.853659	-0.153153	-0.866667	0.903382	0.894737	-0.666667	0.333333	-0.16	-0.870968	0.62069	-0.226415	-0.2	-0.333333	-0.334539	0.487179	-0.794118	0.72973	0.208333	0.188679	0.405405	-0.823529	-0.0769231	0.183673	0.142857	0.627119	-0.647059	0.276596	-0.875	0.304348	0	0	0.904762	0.43662	0.22807	0.979798	0.285714	-0.272727	-0.875	-0.0357143	0.577465
										0.853659	-0.153153	-0.866667	0.903382	0.894737	-0.666667	0.333333	-0.16	-0.870968	0.62069	-0.226415	-0.2	-0.333333	-0.334539	0.487179	-0.794118	0.72973	0.208333	0.188679	0.405405	-0.823529	-0.0769231	0.183673	0.142857	0.627119	-0.647059	0.276596	-0.875	0.22449	0	0	0.904762	0.43662	0.22807	0.979798	0.285714	-0.272727	-0.875	-0.0357143	0.577465
										0.853659	-0.153153	-0.866667	0.903382	0.894737	-0.666667	0.333333	-0.16	-0.870968	0.62069	-0.226415	-0.2	-0.333333	-0.33813	0.487179	-0.768116	0.72973	0.208333	0.188679	0.405405	-0.823529	-0.0769231	0.183673	0.142857	0.627119	-0.647059	0.276596	-0.875	0.22449	0	0	0.904762	0.43662	0.22807	0.979798	0.285714	-0.272727	-0.875	-0.0357143	0.577465
										0.853659	-0.153153	-0.866667	0.903382	0.894737	-0.666667	0.333333	-0.16	-0.870968	0.62069	-0.226415	-0.2	-0.333333	-0.341682	0.487179	-0.742857	0.72973	0.208333	0.188679	0.405405	-0.823529	-0.0769231	0.183673	0.142857	0.627119	-0.333333	0.276596	-0.875	0.22449	0	0	0.904762	0.43662	0.22807	0.979798	0.285714	-0.272727	-0.875	-0.0357143	0.577465
										0.853659	-0.153153	-0.866667	0.903382	0.894737	-0.666667	0.333333	-0.16	-0.870968	0.62069	-0.226415	-0.2	-0.333333	-0.348673	0.487179	-0.742857	0.72973	0.208333	0.188679	0.405405	-0.823529	-0.0769231	0.183673	0.142857	0.627119	-0.272727	0.276596	-0.875	0.22449	0	0	0.904762	0.43662	0.22807	0.979798	0.285714	-0.272727	-0.875	-0.0357143	0.577465
										0.853659	-0.153153	-0.866667	0.903382	0.894737	-0.666667	0.333333	-0.16	-0.870968	0.62069	-0.226415	-0.2	-0.333333	-0.355517	0.487179	-0.71831	0.72973	0.208333	0.188679	0.405405	-0.823529	-0.0769231	0.183673	0.142857	0.627119	-0.217391	0.276596	-0.875	0.22449	0	0	0.904762	0.43662	0.22807	0.979798	0.285714	-0.272727	-0.875	-0.0357143	0.577465
										0.853659	-0.153153	-0.866667	0.903382	0.894737	-0.666667	0.333333	-0.16	-0.870968	0.62069	-0.226415	-0.2	-0.333333	-0.356643	0.487179	-0.71831	0.72973	0.208333	0.188679	0.405405	-0.823529	-0.0769231	0.183673	0.142857	0.627119	-0.166667	0.276596	-0.875	0.22449	0	0	0.904762	0.43662	0.22807	0.979798	0.285714	-0.272727	-0.875	-0.0357143	0.577465
										0.853659	-0.153153	-0.866667	0.903382	0.894737	-0.666667	0.333333	-0.16	-0.870968	0.62069	-0.226415	-0.2	-0.333333	-0.357766	0.487179	-0.71831	0.72973	0.208333	0.188679	0.405405	-0.823529	-0.0769231	0.183673	0.142857	0.627119	-0.12	0.276596	-0.875	0.22449	0	0	0.904762	0.43662	0.22807	0.979798	0.285714	-0.272727	-0.875	-0.0357143	0.577465
										0.853659	-0.153153	-0.866667	0.903382	0.894737	-0.666667	0.333333	-0.16	-0.870968	0.62069	-0.226415	-0.2	-0.333333	-0.357766	0.487179	-0.71831	0.72973	0.208333	0.188679	0.405405	-0.823529	-0.0769231	0.183673	0.142857	0.627119	-0.0769231	0.276596	-0.875	0.22449	0	0	0.904762	0.43662	0.22807	0.979798	0.285714	-0.272727	-0.875	-0.0357143	0.577465
										0.853659	-0.153153	-0.866667	0.903382	0.894737	-0.666667	0.333333	-0.16	-0.870968	0.62069	-0.226415	-0.2	-0.333333	-0.36	0.487179	-0.71831	0.72973	0.208333	0.188679	0.405405	-0.823529	-0.0769231	0.183673	0.142857	0.627119	0	0.276596	-0.875	0.22449	0	0	0.904762	0.43662	0.22807	0.979798	0.285714	-0.272727	-0.875	-0.0357143	0.577465
										0.853659	-0.153153	-0.866667	0.903382	0.894737	-0.666667	0.333333	-0.16	-0.870968	0.62069	-0.226415	-0.2	-0.333333	-0.36	0.487179	-0.71831	0.72973	0.208333	0.188679	0.405405	-0.823529	-0.0769231	0.183673	0.142857	0.627119	0.0666667	0.276596	-0.875	0.22449	0	0	0.904762	0.43662	0.22807	0.979798	0.285714	-0.272727	-0.882353	-0.0357143	0.577465
										0.853659	-0.153153	-0.866667	0.903382	0.894737	-0.666667	0.333333	-0.16	-0.870968	0.62069	-0.226415	-0.2	-0.333333	-0.366609	0.487179	-0.71831	0.72973	0.208333	0.188679	0.405405	-0.823529	-0.0769231	0.183673	0.142857	0.627119	0.176471	0.276596	-0.875	0.22449	0	0	0.904762	0.43662	0.22807	0.979798	0.285714	-0.272727	-0.882353	-0.0357143	0.577465
										0.853659	-0.153153	-0.866667	0.903382	0.894737	-0.666667	0.333333	-0.16	-0.870968	0.62069	-0.226415	-0.2	-0.333333	-0.37094	0.487179	-0.71831	0.72973	0.208333	0.188679	0.405405	-0.823529	-0.0769231	0.183673	0.142857	0.627119	0.2	0.276596	-0.875	0.22449	0	0	0.904762	0.43662	0.22807	0.979798	0.285714	-0.272727	-0.882353	-0.0357143	0.577465
										0.853659	-0.153153	-0.866667	0.903382	0.894737	-0.666667	0.333333	-0.16	-0.870968	0.62069	-0.226415	-0.2	-0.333333	-0.372014	0.487179	-0.71831	0.72973	0.208333	0.188679	0.405405	-0.823529	-0.0769231	0.183673	0.142857	0.627119	0.222222	0.276596	-0.875	0.22449	0	0	0.904762	0.43662	0.22807	0.979798	0.285714	-0.272727	-0.882353	-0.0357143	0.577465
										0.853659	-0.153153	-0.866667	0.903382	0.894737	-0.666667	0.333333	-0.16	-0.870968	0.62069	-0.226415	-0.2	-0.333333	-0.372014	0.487179	-0.71831	0.72973	0.208333	0.188679	0.405405	-0.823529	-0.0769231	0.183673	0.142857	0.627119	0.317073	0.276596	-0.875	0.22449	0	0	0.904762	0.43662	0.22807	0.979798	0.285714	-0.272727	-0.882353	-0.0357143	0.577465
										0.853659	-0.153153	-0.866667	0.903382	0.894737	-0.666667	0.333333	-0.16	-0.870968	0.62069	-0.226415	-0.2	-0.333333	-0.37415	0.487179	-0.71831	0.72973	0.208333	0.188679	0.405405	-0.823529	-0.0769231	0.183673	0.142857	0.627119	0.404255	0.276596	-0.875	0.22449	0	0	0.904762	0.43662	0.22807	0.979798	0.285714	-0.272727	-0.882353	-0.0357143	0.577465
										0.853659	-0.153153	-0.866667	0.903382	0.894737	-0.666667	0.333333	-0.16	-0.870968	0.62069	-0.226415	-0.2	-0.333333	-0.378378	0.487179	-0.71831	0.72973	0.208333	0.188679	0.405405	-0.823529	-0.0769231	0.183673	0.142857	0.627119	0.416667	0.276596	-0.875	0.22449	0	0	0.904762	0.43662	0.22807	0.979798	0.285714	-0.272727	-0.882353	-0.0357143	0.577465
										0.853659	-0.153153	-0.866667	0.903382	0.894737	-0.666667	0.333333	-0.16	-0.870968	0.62069	-0.226415	-0.2	-0.333333	-0.384615	0.487179	-0.71831	0.72973	0.208333	0.188679	0.405405	-0.823529	-0.0769231	0.183673	0.142857	0.627119	0.416667	0.276596	-0.875	0.22449	0	0	0.904762	0.43662	0.22807	0.979798	0.285714	-0.272727	-0.882353	-0.0357143	0.577465
										0.853659	-0.153153	-0.866667	0.903382	0.894737	-0.666667	0.333333	-0.16	-0.870968	0.62069	-0.226415	-0.2	-0.333333	-0.388704	0.487179	-0.71831	0.72973	0.208333	0.188679	0.405405	-0.823529	-0.0769231	0.183673	0.142857	0.633333	0.416667	0.276596	-0.875	0.22449	0	0	0.904762	0.43662	0.22807	0.979798	0.285714	-0.272727	-0.882353	-0.0357143	0.577465
										0.853659	-0.153153	-0.866667	0.903382	0.894737	-0.666667	0.333333	-0.16	-0.870968	0.62069	-0.226415	-0.2	-0.333333	-0.394737	0.487179	-0.71831	0.72973	0.208333	0.188679	0.405405	-0.823529	-0.0769231	0.183673	0.142857	0.633333	0.416667	0.276596	-0.875	0.22449	0	0	0.904762	0.43662	0.22807	0.979798	0.285714	-0.272727	-0.882353	-0.0357143	0.577465
										0.853659	-0.153153	-0.866667	0.903382	0.894737	-0.666667	0.333333	-0.16	-0.870968	0.62069	-0.226415	-0.2	-0.333333	-0.399674	0.487179	-0.71831	0.72973	0.208333	0.188679	0.405405	-0.823529	-0.0769231	0.183673	0.142857	0.633333	0.416667	0.276596	-0.875	0.22449	0	0	0.904762	0.43662	0.22807	0.979798	0.285714	-0.272727	-0.882353	-0.0357143	0.577465
										0.853659	-0.153153	-0.866667	0.903382	0.894737	-0.666667	0.333333	-0.16	-0.870968	0.62069	-0.226415	-0.2	-0.333333	-0.403566	0.487179	-0.71831	0.72973	0.208333	0.188679	0.405405	-0.823529	-0.0769231	0.183673	0.142857	0.633333	0.416667	0.276596	-0.875	0.22449	0	0	0.904762	0.43662	0.22807	0.979798	0.285714	-0.272727	-0.882353	-0.0357143	0.577465
										0.853659	-0.153153	-0.866667	0.903382	0.894737	-0.666667	0.333333	-0.16	-0.870968	0.62069	-0.226415	-0.2	-0.333333	-0.403566	0.487179	-0.71831	0.72973	0.208333	0.188679	0.405405	-0.823529	-0.0769231	0.183673	0.142857	0.633333	0.416667	0.276596	-0.875	0.22449	0	0	0.904762	0.43662	0.22807	0.979798	0.285714	-0.272727	-0.882353	-0.0357143	0.577465
										0.853659	-0.153153	-0.866667	0.903382	0.894737	-0.666667	0.333333	-0.16	-0.870968	0.62069	-0.226415	-0.2	-0.333333	-0.404531	0.487179	-0.71831	0.72973	0.208333	0.188679	0.405405	-0.823529	-0.0769231	0.183673	0.142857	0.633333	0.416667	0.276596	-0.875	0.22449	0	0	0.904762	0.43662	0.22807	0.979798	0.285714	-0.272727	-0.882353	-0.0357143	0.577465
										0.853659	-0.153153	-0.866667	0.903382	0.894737	-0.666667	0.333333	-0.16	-0.870968	0.62069	-0.226415	-0.2	-0.333333	-0.404531	0.487179	-0.71831	0.72973	0.208333	0.188679	0.405405	-0.823529	-0.0769231	0.183673	0.142857	0.633333	0.416667	0.276596	-0.875	0.22449	0	0	0.904762	0.43662	0.22807	0.979798	0.285714	-0.272727	-0.882353	-0.0357143	0.577465
										0.853659	-0.153153	-0.866667	0.903382	0.894737	-0.666667	0.333333	-0.16	-0.870968	0.62069	-0.226415	-0.2	-0.333333	-0.4112	0.487179	-0.71831	0.72973	0.208333	0.188679	0.405405	-0.823529	-0.0769231	0.183673	0.142857	0.633333	0.416667	0.276596	-0.875	0.22449	0	0	0.904762	0.43662	0.22807	0.979798	0.285714	-0.272727	-0.882353	-0.0357143	0.577465
										0.853659	-0.153153	-0.866667	0.903382	0.894737	-0.666667	0.333333	-0.16	-0.870968	0.62069	-0.226415	-0.2	-0.333333	-0.414013	0.487179	-0.71831	0.72973	0.208333	0.188679	0.405405	-0.823529	-0.0769231	0.183673	0.142857	0.633333	0.416667	0.276596	-0.875	0.22449	0	0	0.904762	0.43662	0.22807	0.979798	0.285714	-0.272727	-0.882353	-0.0357143	0.577465
										0.853659	-0.153153	-0.866667	0.903382	0.894737	-0.666667	0.333333	-0.16	-0.870968	0.62069	-0.226415	-0.2	-0.333333	-0.417722	0.487179	-0.71831	0.72973	0.208333	0.188679	0.405405	-0.823529	-0.0769231	0.183673	0.142857	0.633333	0.416667	0.276596	-0.875	0.22449	0	0	0.904762	0.43662	0.22807	0.979798	0.285714	-0.272727	-0.882353	-0.0357143	0.577465
										0.853659	-0.153153	-0.866667	0.903382	0.894737	-0.666667	0.333333	-0.16	-0.870968	0.62069	-0.226415	-0.2	-0.333333	-0.420472	0.487179	-0.71831	0.72973	0.208333	0.188679	0.405405	-0.823529	-0.0769231	0.183673	0.142857	0.633333	0.416667	0.276596	-0.875	0.22449	0	0	0.904762	0.43662	0.22807	0.979798	0.285714	-0.272727	-0.882353	-0.0357143	0.577465
										0.853659	-0.153153	-0.866667	0.903382	0.894737	-0.666667	0.333333	-0.16	-0.870968	0.62069	-0.226415	-0.2	-0.333333	-0.421384	0.487179	-0.71831	0.72973	0.208333	0.188679	0.405405	-0.823529	-0.0769231	0.183673	0.142857	0.633333	0.416667	0.276596	-0.875	0.22449	0	0	0.904762	0.43662	0.22807	0.979798	0.285714	-0.272727	-0.882353	-0.0357143	0.577465
										0.853659	-0.153153	-0.866667	0.903382	0.894737	-0.666667	0.333333	-0.16	-0.870968	0.62069	-0.226415	-0.2	-0.333333	-0.421384	0.487179	-0.71831	0.72973	0.208333	0.188679	0.405405	-0.823529	-0.0769231	0.183673	0.142857	0.633333	0.416667	0.276596	-0.875	0.22449	0	0	0.904762	0.43662	0.22807	0.979798	0.285714	-0.272727	-0.882353	-0.0357143	0.577465
										0.853659	-0.153153	-0.866667	0.903382	0.894737	-0.666667	0.333333	-0.16	-0.870968	0.62069	-0.226415	-0.2	-0.333333	-0.421384	0.487179	-0.71831	0.72973	0.208333	0.188679	0.405405	-0.823529	-0.0769231	0.183673	0.142857	0.633333	0.416667	0.276596	-0.875	0.22449	0	0	0.904762	0.43662	0.22807	0.979798	0.285714	-0.272727	-0.882353	-0.0357143	0.577465
										0.853659	-0.153153	-0.866667	0.903382	0.894737	-0.666667	0.333333	-0.16	-0.870968	0.62069	-0.226415	-0.2	-0.333333	-0.421384	0.487179	-0.71831	0.72973	0.208333	0.188679	0.405405	-0.823529	-0.0769231	0.183673	0.142857	0.633333	0.416667	0.276596	-0.875	0.22449	0	0	0.904762	0.43662	0.22807	0.979798	0.285714	-0.272727	-0.882353	-0.0357143	0.577465
										0.853659	-0.153153	-0.866667	0.903382	0.894737	-0.666667	0.333333	-0.16	-0.870968	0.62069	-0.226415	-0.2	-0.333333	-0.421384	0.487179	-0.71831	0.72973	0.208333	0.192488	0.405405	-0.823529	-0.0769231	0.183673	0.142857	0.633333	0.416667	0.276596	-0.875	0.22449	0	0	0.904762	0.43662	0.22807	0.979798	0.285714	-0.272727	-0.882353	-0.0357143	0.577465
										0.853659	-0.153153	-0.866667	0.903382	0.894737	-0.666667	0.333333	-0.16	-0.870968	0.62069	-0.226415	-0.2	-0.333333	-0.421384	0.487179	-0.694444	0.72973	0.208333	0.207373	0.333333	-0.823529	-0.0769231	0.183673	0.142857	0.633333	0.416667	0.276596	-0.875	0.22449	0	0	0.904762	0.43662	0.22807	0.979798	0.285714	-0.272727	-0.882353	-0.0357143	0.577465
										0.853659	-0.153153	-0.866667	0.903382	0.894737	-0.666667	0.333333	-0.16	-0.870968	0.62069	-0.226415	-0.2	-0.333333	-0.421384	0.487179	-0.694444	0.72973	0.208333	0.207373	0.333333	-0.823529	-0.0769231	0.183673	0.142857	0.633333	0.416667	0.276596	-0.875	0.22449	0	0	0.904762	0.43662	0.22807	0.979798	0.285714	-0.272727	-0.882353	-0.0357143	0.577465
										0.853659	-0.153153	-0.866667	0.903382	0.894737	-0.666667	0.333333	-0.16	-0.870968	0.62069	-0.226415	-0.2	-0.333333	-0.421384	0.487179	-0.694444	0.72973	0.208333	0.190909	0.333333	-0.823529	-0.0769231	0.183673	0.142857	0.633333	0.416667	0.276596	-0.875	0.22449	0	0	0.904762	0.43662	0.22807	0.979798	0.285714	-0.272727	-0.882353	-0.0357143	0.577465
										0.853659	-0.153153	-0.866667	0.903382	0.894737	-0.666667	0.333333	-0.16	-0.870968	0.62069	-0.226415	-0.2	-0.333333	-0.421384	0.487179	-0.694444	0.72973	0.208333	0.174888	0.333333	-0.823529	-0.0769231	0.183673	0.142857	0.633333	0.416667	0.276596	-0.875	0.22449	0	0	0.904762	0.43662	0.22807	0.979798	0.285714	-0.272727	-0.882353	-0.0357143	0.577465
										0.853659	-0.153153	-0.866667	0.903382	0.894737	-0.666667	0.333333	-0.16	-0.870968	0.62069	-0.226415	-0.2	-0.333333	-0.421384	0.487179	-0.694444	0.72973	0.208333	0.174888	0.333333	-0.823529	-0.0769231	0.183673	0.142857	0.633333	0.387755	0.276596	-0.875	0.22449	0	0	0.904762	0.43662	0.22807	0.979798	0.285714	-0.272727	-0.882353	-0.0357143	0.577465
										0.853659	-0.153153	-0.866667	0.903382	0.894737	-0.666667	0.333333	-0.16	-0.870968	0.62069	-0.226415	-0.2	-0.333333	-0.421384	0.487179	-0.694444	0.72973	0.208333	0.174888	0.333333	-0.823529	-0.0769231	0.183673	0.142857	0.633333	0.387755	0.276596	-0.875	0.22449	0	0	0.904762	0.43662	0.22807	0.979798	0.285714	-0.272727	-0.882353	-0.0357143	0.577465
										0.853659	-0.153153	-0.866667	0.903382	0.894737	-0.666667	0.333333	-0.16	-0.870968	0.62069	-0.226415	-0.2	-0.333333	-0.421384	0.487179	-0.694444	0.72973	0.208333	0.174888	0.333333	-0.823529	-0.0769231	0.183673	0.142857	0.633333	0.387755	0.276596	-0.875	0.22449	0	0	0.904762	0.43662	0.22807	0.979798	0.285714	-0.272727	-0.882353	-0.0357143	0.577465
										0.853659	-0.153153	-0.866667	0.903382	0.894737	-0.666667	0.333333	-0.16	-0.870968	0.62069	-0.203704	-0.2	-0.333333	-0.421384	0.487179	-0.694444	0.72973	0.208333	0.174888	0.333333	-0.823529	-0.0769231	0.183673	0.142857	0.633333	0.387755	0.276596	-0.875	0.22449	0	0	0.904762	0.43662	0.22807	0.979798	0.285714	-0.272727	-0.882353	-0.0357143	0.577465
										0.853659	-0.153153	-0.866667	0.903382	0.894737	-0.666667	0.333333	-0.16	-0.870968	0.62069	-0.18541	-0.2	-0.333333	-0.421384	0.487179	-0.694444	0.72973	0.208333	0.174888	0.333333	-0.823529	-0.0769231	0.183673	0.142857	0.633333	0.387755	0.276596	-0.875	0.22449	0	0	0.904762	0.43662	0.22807	0.979798	0.285714	-0.272727	-0.888889	-0.0357143	0.577465
										0.853659	-0.153153	-0.866667	0.903382	0.894737	-0.666667	0.333333	-0.16	-0.870968	0.62069	-0.160714	-0.2	-0.333333	-0.421384	0.487179	-0.694444	0.72973	0.208333	0.189427	0.333333	-0.823529	-0.0769231	0.183673	0.142857	0.633333	0.387755	0.276596	-0.875	0.22449	0	0	0.904762	0.43662	0.22807	0.979798	0.285714	-0.272727	-0.888889	-0.0357143	0.577465
										0.853659	-0.153153	-0.866667	0.903382	0.894737	-0.666667	0.333333	-0.16	-0.870968	0.62069	-0.150443	-0.2	-0.333333	-0.421384	0.487179	-0.671233	0.72973	0.208333	0.203463	0.333333	-0.823529	-0.0769231	0.183673	0.142857	0.633333	0.387755	0.276596	-0.875	0.22449	0	0	0.904762	0.43662	0.22807	0.979798	0.285714	-0.272727	-0.888889	-0.0357143	0.577465
										0.853659	-0.153153	-0.866667	0.903382	0.894737	-0.666667	0.333333	-0.16	-0.870968	0.62069	-0.150443	-0.2	-0.333333	-0.421384	0.487179	-0.671233	0.72973	0.208333	0.203463	0.333333	-0.823529	-0.0769231	0.183673	0.142857	0.633333	0.387755	0.276596	-0.875	0.22449	0	0	0.904762	0.43662	0.22807	0.979798	0.285714	-0.294118	-0.888889	-0.0357143	0.577465
										0.853659	-0.153153	-0.866667	0.903382	0.894737	-0.666667	0.333333	-0.16	-0.870968	0.62069	-0.150443	-0.2	-0.333333	-0.421384	0.487179	-0.671233	0.72973	0.208333	0.203463	0.333333	-0.823529	-0.0769231	0.183673	0.142857	0.633333	0.387755	0.276596	-0.875	0.22449	0	0	0.904762	0.43662	0.22807	0.979798	0.285714	-0.294118	-0.888889	-0.0357143	0.555556
										0.853659	-0.153153	-0.866667	0.903382	0.894737	-0.666667	0.333333	-0.16	-0.870968	0.62069	-0.150443	-0.2	-0.333333	-0.421384	0.487179	-0.671233	0.72973	0.208333	0.203463	0.333333	-0.823529	-0.0769231	0.183673	0.142857	0.633333	0.387755	0.276596	-0.875	0.22449	0	0	0.904762	0.43662	0.22807	0.979798	0.285714	-0.294118	-0.888889	-0.0357143	0.555556
										0.853659	-0.153153	-0.866667	0.903382	0.894737	-0.666667	0.333333	-0.16	-0.870968	0.62069	-0.150443	-0.2	-0.333333	-0.421384	0.487179	-0.671233	0.72973	0.208333	0.203463	0.333333	-0.823529	-0.0769231	0.183673	0.142857	0.633333	0.387755	0.276596	-0.875	0.22449	0	0	0.904762	0.43662	0.22807	0.979798	0.285714	-0.294118	-0.888889	-0.0357143	0.555556
										0.853659	-0.153153	-0.866667	0.903382	0.894737	-0.666667	0.333333	-0.16	-0.870968	0.62069	-0.150443	-0.2	-0.333333	-0.421384	0.487179	-0.671233	0.72973	0.208333	0.203463	0.333333	-0.823529	-0.0769231	0.183673	0.142857	0.633333	0.387755	0.276596	-0.875	0.22449	0	0	0.904762	0.43662	0.22807	0.979798	0.285714	-0.294118	-0.888889	-0.0357143	0.555556
										0.853659	-0.153153	-0.866667	0.903382	0.894737	-0.666667	0.333333	-0.16	-0.870968	0.62069	-0.150443	-0.2	-0.333333	-0.421384	0.487179	-0.648649	0.72973	0.208333	0.203463	0.333333	-0.823529	-0.0769231	0.183673	0.142857	0.633333	0.387755	0.276596	-0.875	0.22449	0	0	0.904762	0.43662	0.22807	0.979798	0.285714	-0.294118	-0.888889	-0.0357143	0.555556
										0.853659	-0.153153	-0.866667	0.903382	0.894737	-0.666667	0.333333	-0.16	-0.870968	0.62069	-0.150443	-0.2	-0.333333	-0.421384	0.487179	-0.648649	0.72973	0.208333	0.203463	0.333333	-0.823529	-0.0769231	0.183673	0.142857	0.633333	0.387755	0.276596	-0.875	0.22449	0	0	0.904762	0.43662	0.22807	0.979798	0.285714	-0.294118	-0.888889	-0.0357143	0.555556
										0.853659	-0.153153	-0.866667	0.903382	0.894737	-0.666667	0.333333	-0.16	-0.870968	0.62069	-0.150443	-0.2	-0.333333	-0.421384	0.487179	-0.648649	0.72973	0.208333	0.203463	0.333333	-0.823529	-0.0769231	0.183673	0.142857	0.633333	0.387755	0.276596	-0.875	0.22449	0	0	0.904762	0.43662	0.22807	0.979798	0.285714	-0.294118	-0.888889	-0.0357143	0.555556
										0.853659	-0.153153	-0.866667	0.903382	0.894737	-0.666667	0.333333	-0.16	-0.870968	0.62069	-0.150443	-0.2	-0.333333	-0.421384	0.487179	-0.605263	0.72973	0.208333	0.203463	0.333333	-0.823529	-0.0769231	0.183673	0.142857	0.633333	0.387755	0.276596	-0.875	0.22449	0	0	0.904762	0.43662	0.22807	0.979798	0.285714	-0.294118	-0.888889	-0.0357143	0.555556
										0.853659	-0.153153	-0.866667	0.903382	0.894737	-0.666667	0.333333	-0.16	-0.870968	0.62069	-0.150443	-0.2	-0.333333	-0.425	0.487179	-0.605263	0.72973	0.208333	0.203463	0.333333	-0.823529	-0.0769231	0.183673	0.142857	0.633333	0.387755	0.276596	-0.875	0.22449	0	0	0.904762	0.43662	0.22807	0.979798	0.285714	-0.294118	-0.888889	-0.0357143	0.555556
										0.853659	-0.153153	-0.866667	0.903382	0.894737	-0.666667	0.333333	-0.16	-0.870968	0.62069	-0.150443	-0.2	-0.333333	-0.427683	0.487179	-0.605263	0.72973	0.208333	0.203463	0.333333	-0.823529	-0.0769231	0.183673	0.142857	0.633333	0.387755	0.276596	-0.875	0.22449	0	0	0.904762	0.43662	0.22807	0.979798	0.285714	-0.294118	-0.888889	-0.0357143	0.555556
										0.853659	-0.153153	-0.866667	0.903382	0.894737	-0.666667	0.333333	-0.16	-0.870968	0.62069	-0.150443	-0.2	-0.333333	-0.431221	0.487179	-0.605263	0.72973	0.208333	0.203463	0.333333	-0.823529	-0.0769231	0.183673	0.142857	0.633333	0.387755	0.276596	-0.875	0.22449	0	0	0.904762	0.43662	0.22807	0.979798	0.285714	-0.294118	-0.888889	-0.0357143	0.555556
										0.853659	-0.153153	-0.866667	0.903382	0.894737	-0.666667	0.333333	-0.16	-0.870968	0.62069	-0.150443	-0.2	-0.333333	-0.433846	0.487179	-0.584416	0.72973	0.208333	0.203463	0.333333	-0.823529	-0.0769231	0.183673	0.142857	0.633333	0.387755	0.276596	-0.875	0.22449	0	0	0.904762	0.43662	0.22807	0.979798	0.285714	-0.294118	-0.888889	-0.0357143	0.555556
										0.853659	-0.153153	-0.866667	0.903382	0.894737	-0.666667	0.333333	-0.16	-0.870968	0.62069	-0.150443	-0.2	-0.333333	-0.436447	0.487179	-0.584416	0.72973	0.208333	0.203463	0.333333	-0.823529	-0.0769231	0.183673	0.142857	0.633333	0.387755	0.276596	-0.875	0.22449	0	0	0.904762	0.43662	0.22807	0.979798	0.285714	-0.294118	-0.888889	-0.0357143	0.555556
										0.853659	-0.153153	-0.866667	0.903382	0.894737	-0.666667	0.333333	-0.16	-0.870968	0.62069	-0.150443	-0.2	-0.333333	-0.438168	0.487179	-0.584416	0.72973	0.208333	0.203463	0.333333	-0.823529	-0.0769231	0.183673	0.142857	0.633333	0.387755	0.276596	-0.875	0.22449	0	0	0.904762	0.43662	0.22807	0.979798	0.285714	-0.294118	-0.888889	-0.0357143	0.555556
										0.853659	-0.153153	-0.866667	0.903382	0.894737	-0.666667	0.333333	-0.16	-0.870968	0.62069	-0.150443	-0.2	-0.333333	-0.439024	0.487179	-0.584416	0.72973	0.208333	0.203463	0.333333	-0.823529	-0.0769231	0.183673	0.142857	0.633333	0.387755	0.276596	-0.875	0.22449	0	0	0.904762	0.43662	0.22807	0.979798	0.285714	-0.294118	-0.888889	-0.0357143	0.555556
										0.853659	-0.153153	-0.866667	0.903382	0.894737	-0.666667	0.333333	-0.16	-0.870968	0.62069	-0.150443	-0.2	-0.333333	-0.441578	0.487179	-0.564103	0.72973	0.208333	0.203463	0.333333	-0.823529	-0.0769231	0.183673	0.142857	0.633333	0.387755	0.276596	-0.875	0.22449	0	0	0.904762	0.43662	0.22807	0.979798	0.285714	-0.294118	-0.888889	-0.0357143	0.555556
										0.853659	-0.153153	-0.866667	0.903382	0.894737	-0.666667	0.333333	-0.16	-0.870968	0.62069	-0.150443	-0.2	-0.333333	-0.442424	0.487179	-0.564103	0.72973	0.208333	0.203463	0.333333	-0.823529	-0.0769231	0.171717	0.142857	0.633333	0.387755	0.276596	-0.875	0.22449	0	0	0.904762	0.43662	0.22807	0.979798	0.285714	-0.294118	-0.888889	-0.0357143	0.555556
										0.853659	-0.153153	-0.866667	0.903382	0.894737	-0.666667	0.333333	-0.16	-0.870968	0.62069	-0.150443	-0.2	-0.333333	-0.442424	0.487179	-0.544304	0.72973	0.208333	0.203463	0.333333	-0.823529	-0.0769231	0.126214	0.142857	0.633333	0.387755	0.276596	-0.875	0.22449	0	0	0.904762	0.43662	0.22807	0.979798	0.285714	-0.294118	-0.888889	-0.0357143	0.555556
										0.853659	-0.153153	-0.866667	0.903382	0.894737	-0.666667	0.333333	-0.16	-0.870968	0.62069	-0.150443	-0.2	-0.333333	-0.444109	0.487179	-0.487805	0.72973	0.208333	0.203463	0.333333	-0.823529	-0.0769231	0.126214	0.142857	0.633333	0.387755	0.276596	-0.875	0.22449	0	0	0.904762	0.43662	0.22807	0.979798	0.285714	-0.294118	-0.888889	-0.0357143	0.555556
										0.853659	-0.153153	-0.866667	0.903382	0.894737	-0.666667	0.333333	-0.16	-0.870968	0.62069	-0.147059	-0.2	-0.333333	-0.445783	0.487179	-0.46988	0.72973	0.208333	0.203463	0.333333	-0.823529	-0.0769231	0.126214	0.142857	0.633333	0.387755	0.276596	-0.875	0.22449	0	0	0.904762	0.43662	0.22807	0.979798	0.285714	-0.294118	-0.888889	-0.0357143	0.555556
										0.853659	-0.153153	-0.866667	0.903382	0.894737	-0.666667	0.333333	-0.16	-0.870968	0.62069	-0.147059	-0.2	-0.333333	-0.447447	0.487179	-0.46988	0.72973	0.208333	0.203463	0.333333	-0.823529	-0.0769231	0.115385	0.142857	0.606557	0.387755	0.276596	-0.875	0.22449	0	0	0.904762	0.43662	0.22807	0.979798	0.285714	-0.294118	-0.888889	-0.0357143	0.555556
										0.853659	-0.153153	-0.866667	0.903382	0.894737	-0.666667	0.333333	-0.16	-0.87234	0.62069	-0.147059	-0.2	-0.333333	-0.447447	0.487179	-0.452381	0.72973	0.208333	0.203463	0.333333	-0.823529	-0.0769231	0.115385	0.142857	0.606557	0.387755	0.276596	-0.875	0.22449	0	0	0.904762	0.43662	0.22807	0.979798	0.285714	-0.294118	-0.888889	-0.0357143	0.555556
										0.853659	-0.153153	-0.866667	0.903382	0.894737	-0.666667	0.333333	-0.16	-0.87234	0.62069	-0.147059	-0.2	-0.333333	-0.448276	0.487179	-0.418605	0.72973	0.208333	0.203463	0.333333	-0.823529	-0.0769231	0.115385	0.142857	0.606557	0.387755	0.276596	-0.875	0.22449	0	0	0.904762	0.43662	0.22807	0.979798	0.285714	-0.294118	-0.888889	-0.0357143	0.555556
										0.853659	-0.153153	-0.866667	0.903382	0.894737	-0.666667	0.333333	-0.16	-0.87234	0.62069	-0.147059	-0.2	-0.333333	-0.448276	0.487179	-0.418605	0.72973	0.208333	0.203463	0.333333	-0.823529	-0.0769231	0.115385	0.142857	0.606557	0.387755	0.276596	-0.875	0.22449	0	0	0.904762	0.43662	0.22807	0.979798	0.285714	-0.294118	-0.888889	-0.0357143	0.555556
										0.853659	-0.153153	-0.866667	0.903382	0.894737	-0.666667	0.333333	-0.16	-0.87234	0.62069	-0.147059	-0.2	-0.333333	-0.448276	0.487179	-0.386364	0.72973	0.208333	0.203463	0.355372	-0.823529	-0.0769231	0.115385	0.142857	0.606557	0.387755	0.276596	-0.875	0.22449	0	0	0.904762	0.43662	0.22807	0.979798	0.285714	-0.294118	-0.888889	-0.0357143	0.555556
										0.853659	-0.153153	-0.866667	0.903382	0.894737	-0.666667	0.333333	-0.16	-0.87234	0.62069	-0.147059	-0.2	-0.333333	-0.449102	0.487179	-0.386364	0.72973	0.208333	0.203463	0.370968	-0.823529	-0.0769231	0.115385	0.142857	0.606557	0.387755	0.276596	-0.875	0.22449	0	0	0.904762	0.43662	0.22807	0.979798	0.285714	-0.294118	-0.888889	-0.0357143	0.555556
										0.853659	-0.153153	-0.866667	0.903382	0.894737	-0.666667	0.333333	-0.16	-0.87234	0.62069	-0.147059	-0.2	-0.333333	-0.449102	0.487179	-0.386364	0.72973	0.208333	0.203463	0.390625	-0.823529	-0.0769231	0.115385	0.142857	0.606557	0.387755	0.276596	-0.875	0.22449	0	0	0.904762	0.43662	0.22807	0.979798	0.285714	-0.294118	-0.888889	-0.0357143	0.555556
										0.853659	-0.153153	-0.866667	0.903382	0.894737	-0.666667	0.333333	-0.16	-0.87234	0.62069	-0.147059	-0.2	-0.333333	-0.449102	0.487179	-0.386364	0.72973	0.208333	0.203463	0.390625	-0.823529	-0.0769231	0.115385	0.142857	0.606557	0.387755	0.276596	-0.875	0.22449	0	0	0.904762	0.43662	0.22807	0.979798	0.285714	-0.294118	-0.888889	-0.0357143	0.555556
										0.853659	-0.153153	-0.866667	0.903382	0.894737	-0.666667	0.333333	-0.16	-0.87234	0.62069	-0.147059	-0.2	-0.333333	-0.449102	0.487179	-0.386364	0.72973	0.208333	0.203463	0.390625	-0.823529	-0.0769231	0.115385	0.142857	0.606557	0.387755	0.276596	-0.875	0.22449	0	0	0.904762	0.43662	0.22807	0.979798	0.285714	-0.294118	-0.888889	-0.0357143	0.555556
										0.853659	-0.153153	-0.866667	0.903382	0.894737	-0.666667	0.333333	-0.16	-0.87234	0.62069	-0.147059	-0.2	-0.333333	-0.449102	0.487179	-0.386364	0.72973	0.208333	0.203463	0.390625	-0.823529	-0.0769231	0.115385	0.142857	0.606557	0.387755	0.276596	-0.875	0.22449	0	0	0.904762	0.43662	0.22807	0.979798	0.285714	-0.294118	-0.888889	-0.0357143	0.555556
										0.853659	-0.153153	-0.866667	0.903382	0.894737	-0.666667	0.333333	-0.16	-0.87234	0.62069	-0.147059	-0.2	-0.333333	-0.449925	0.487179	-0.386364	0.72973	0.208333	0.203463	0.390625	-0.823529	-0.0769231	0.115385	0.142857	0.606557	0.387755	0.276596	-0.875	0.22449	0	0	0.904762	0.43662	0.22807	0.979798	0.285714	-0.294118	-0.888889	-0.0357143	0.555556
										0.853659	-0.153153	-0.866667	0.903382	0.894737	-0.666667	0.333333	-0.16	-0.87234	0.62069	-0.147059	-0.2	-0.333333	-0.449925	0.487179	-0.386364	0.72973	0.208333	0.203463	0.390625	-0.823529	-0.0769231	0.115385	0.142857	0.606557	0.387755	0.276596	-0.875	0.22449	0	0	0.904762	0.43662	0.22807	0.979798	0.285714	-0.294118	-0.888889	-0.0357143	0.555556
										0.853659	-0.153153	-0.866667	0.903382	0.894737	-0.666667	0.333333	-0.16	-0.87234	0.62069	-0.147059	-0.2	-0.333333	-0.449925	0.487179	-0.386364	0.72973	0.208333	0.203463	0.390625	-0.823529	-0.0769231	0.115385	0.142857	0.606557	0.387755	0.276596	-0.875	0.22449	0	0	0.904762	0.43662	0.22807	0.979798	0.285714	-0.294118	-0.888889	-0.0357143	0.555556
										0.853659	-0.153153	-0.866667	0.903382	0.894737	-0.666667	0.333333	-0.16	-0.87234	0.62069	-0.147059	-0.2	-0.333333	-0.450746	0.487179	-0.386364	0.72973	0.208333	0.203463	0.390625	-0.823529	-0.0769231	0.115385	0.142857	0.606557	0.387755	0.276596	-0.875	0.22449	0	0	0.904762	0.43662	0.22807	0.979798	0.285714	-0.294118	-0.888889	-0.0357143	0.555556
										0.853659	-0.153153	-0.866667	0.903382	0.894737	-0.666667	0.333333	-0.16	-0.87234	0.62069	-0.147059	-0.2	-0.333333	-0.451565	0.487179	-0.386364	0.72973	0.208333	0.203463	0.390625	-0.823529	-0.0769231	0.115385	0.142857	0.606557	0.387755	0.276596	-0.875	0.22449	0	0	0.904762	0.43662	0.22807	0.979798	0.285714	-0.294118	-0.888889	-0.0357143	0.555556
										0.853659	-0.153153	-0.866667	0.903382	0.894737	-0.666667	0.333333	-0.16	-0.87234	0.62069	-0.147059	-0.2	-0.333333	-0.452381	0.487179	-0.386364	0.72973	0.208333	0.203463	0.390625	-0.823529	-0.0769231	0.115385	0.142857	0.606557	0.387755	0.276596	-0.875	0.22449	0	0	0.904762	0.43662	0.22807	0.979798	0.285714	-0.294118	-0.888889	-0.0357143	0.555556
										0.853659	-0.153153	-0.866667	0.903382	0.894737	-0.666667	0.333333	-0.16	-0.87234	0.62069	-0.147059	-0.2	-0.333333	-0.454815	0.487179	-0.386364	0.72973	0.208333	0.203463	0.390625	-0.823529	-0.0769231	0.115385	0.142857	0.606557	0.387755	0.276596	-0.875	0.22449	0	0	0.904762	0.43662	0.22807	0.979798	0.285714	-0.294118	-0.888889	-0.0357143	0.555556
										0.853659	-0.153153	-0.866667	0.903382	0.894737	-0.666667	0.333333	-0.16	-0.87234	0.62069	-0.147059	-0.2	-0.333333	-0.456425	0.487179	-0.386364	0.72973	0.208333	0.203463	0.390625	-0.823529	-0.0769231	0.115385	0.142857	0.606557	0.387755	0.276596	-0.875	0.22449	0	0	0.904762	0.43662	0.22807	0.979798	0.285714	-0.294118	-0.888889	-0.0357143	0.555556
										0.853659	-0.153153	-0.866667	0.903382	0.894737	-0.666667	0.333333	-0.16	-0.87234	0.62069	-0.147059	-0.2	-0.333333	-0.458027	0.487179	-0.386364	0.72973	0.208333	0.203463	0.390625	-0.823529	-0.0769231	0.115385	0.142857	0.606557	0.387755	0.276596	-0.875	0.22449	0	0	0.904762	0.43662	0.22807	0.979798	0.285714	-0.294118	-0.888889	-0.0357143	0.555556
										0.853659	-0.153153	-0.866667	0.903382	0.894737	-0.666667	0.333333	-0.16	-0.87234	0.62069	-0.147059	-0.2	-0.333333	-0.460411	0.487179	-0.386364	0.72973	0.24	0.203463	0.395349	-0.823529	-0.0769231	0.115385	0.142857	0.606557	0.387755	0.276596	-0.875	0.22449	0	0	0.904762	0.43662	0.22807	0.979798	0.285714	-0.294118	-0.888889	-0.0357143	0.555556
										0.853659	-0.153153	-0.866667	0.903382	0.894737	-0.666667	0.333333	-0.16	-0.87234	0.62069	-0.147059	-0.2	-0.333333	-0.461988	0.487179	-0.386364	0.72973	0.24	0.203463	0.4	-0.823529	-0.0769231	0.115385	0.142857	0.606557	0.387755	0.276596	-0.875	0.22449	0	-0.333333	0.904762	0.43662	0.22807	0.979798	0.285714	-0.294118	-0.888889	-0.0357143	0.555556
										0.853659	-0.153153	-0.866667	0.903382	0.894737	-0.666667	0.333333	-0.16	-0.87234	0.62069	-0.147059	-0.2	-0.333333	-0.462774	0.487179	-0.355556	0.72973	0.269231	0.203463	0.4	-0.823529	-0.0769231	0.115385	0.142857	0.606557	0.387755	0.276596	-0.875	0.22449	0	-0.333333	0.904762	0.43662	0.22807	0.979798	0.285714	-0.294118	-0.888889	-0.0357143	0.555556
										0.853659	-0.153153	-0.866667	0.903382	0.894737	-0.666667	0.333333	-0.16	-0.87234	0.62069	-0.147059	-0.2	-0.333333	-0.462774	0.487179	-0.355556	0.72973	0.283019	0.203463	0.4	-0.823529	-0.0769231	0.115385	0.142857	0.606557	0.387755	0.276596	-0.875	0.22449	0	-0.333333	0.904762	0.43662	0.22807	0.979798	0.285714	-0.294118	-0.888889	-0.0357143	0.555556
										0.853659	-0.153153	-0.866667	0.903382	0.894737	-0.666667	0.333333	-0.16	-0.87234	0.62069	-0.147059	-0.2	-0.333333	-0.463557	0.487179	-0.355556	0.72973	0.309091	0.203463	0.4	-0.823529	-0.0769231	0.115385	0.142857	0.606557	0.387755	0.276596	-0.875	0.22449	0	-0.333333	0.904762	0.43662	0.22807	0.979798	0.285714	-0.294118	-0.888889	-0.0357143	0.555556
										0.853659	-0.153153	-0.866667	0.903382	0.894737	-0.666667	0.333333	-0.16	-0.87234	0.62069	-0.147059	-0.2	-0.333333	-0.465116	0.487179	-0.340659	0.72973	0.355932	0.203463	0.4	-0.823529	-0.0769231	0.115385	0.142857	0.606557	0.387755	0.276596	-0.875	0.22449	0	-0.333333	0.904762	0.43662	0.22807	0.979798	0.285714	-0.294118	-0.888889	-0.0357143	0.555556
										0.853659	-0.153153	-0.866667	0.903382	0.894737	-0.666667	0.333333	-0.16	-0.87234	0.62069	-0.147059	-0.2	-0.333333	-0.466667	0.487179	-0.340659	0.72973	0.366667	0.203463	0.4	-0.823529	-0.0769231	0.115385	0.142857	0.606557	0.387755	0.276596	-0.875	0.22449	0	-0.333333	0.904762	0.43662	0.22807	0.979798	0.285714	-0.294118	-0.888889	-0.0357143	0.555556
										0.853659	-0.153153	-0.866667	0.903382	0.894737	-0.666667	0.333333	-0.16	-0.87234	0.62069	-0.147059	-0.2	-0.333333	-0.470504	0.487179	-0.340659	0.72973	0.377049	0.203463	0.4	-0.823529	-0.0769231	0.115385	0.142857	0.606557	0.387755	0.276596	-0.875	0.22449	0	-0.333333	0.904762	0.43662	0.22807	0.979798	0.285714	-0.294118	-0.888889	-0.0357143	0.555556
										0.853659	-0.153153	-0.866667	0.903382	0.894737	-0.666667	0.333333	-0.16	-0.87234	0.62069	-0.147059	-0.2	-0.333333	-0.472023	0.487179	-0.340659	0.72973	0.387097	0.203463	0.4	-0.823529	-0.0769231	0.115385	0.142857	0.606557	0.387755	0.276596	-0.875	0.22449	0	-0.333333	0.904762	0.43662	0.22807	0.979798	0.285714	-0.294118	-0.888889	-0.0357143	0.555556
										0.853659	-0.153153	-0.866667	0.903382	0.894737	-0.666667	0.333333	-0.16	-0.87234	0.62069	-0.147059	-0.2	-0.333333	-0.475036	0.487179	-0.340659	0.72973	0.396825	0.203463	0.4	-0.823529	-0.0769231	0.115385	0.142857	0.606557	0.387755	0.276596	-0.875	0.22449	0	-0.333333	0.904762	0.43662	0.22807	0.979798	0.285714	-0.294118	-0.888889	-0.0357143	0.555556
										0.853659	-0.153153	-0.866667	0.903382	0.894737	-0.666667	0.333333	-0.16	-0.87234	0.62069	-0.147059	-0.2	-0.333333	-0.475036	0.487179	-0.311828	0.72973	0.424242	0.203463	0.4	-0.823529	-0.0769231	0.115385	0.142857	0.606557	0.387755	0.276596	-0.875	0.22449	0	-0.333333	0.904762	0.43662	0.22807	0.979798	0.285714	-0.294118	-0.888889	-0.0357143	0.555556
										0.853659	-0.153153	-0.866667	0.903382	0.894737	-0.666667	0.333333	-0.16	-0.87234	0.62069	-0.147059	-0.2	-0.333333	-0.475036	0.487179	-0.297872	0.72973	0.449275	0.203463	0.4	-0.823529	-0.0769231	0.115385	0.142857	0.606557	0.387755	0.276596	-0.875	0.22449	0	-0.333333	0.904762	0.43662	0.22807	0.979798	0.285714	-0.294118	-0.888889	-0.0357143	0.555556
										0.853659	-0.153153	-0.866667	0.903382	0.894737	-0.666667	0.333333	-0.16	-0.87234	0.62069	-0.147059	-0.2	-0.333333	-0.475784	0.487179	-0.297872	0.72973	0.464789	0.203463	0.4	-0.823529	-0.0769231	0.115385	0.142857	0.606557	0.387755	0.276596	-0.875	0.22449	0	-0.333333	0.904762	0.43662	0.22807	0.979798	0.285714	-0.294118	-0.888889	-0.0357143	0.555556
										0.853659	-0.153153	-0.866667	0.903382	0.894737	-0.666667	0.333333	-0.16	-0.87234	0.62069	-0.147059	-0.2	-0.333333	-0.475784	0.487179	-0.28421	0.72973	0.464789	0.203463	0.4	-0.823529	-0.0769231	0.115385	0.142857	0.606557	0.387755	0.276596	-0.875	0.22449	0	-0.333333	0.904762	0.43662	0.22807	0.979798	0.285714	-0.294118	-0.888889	-0.0357143	0.555556
										0.853659	-0.153153	-0.866667	0.903382	0.894737	-0.666667	0.333333	-0.16	-0.87234	0.62069	-0.147059	-0.2	-0.333333	-0.475784	0.487179	-0.257732	0.72973	0.464789	0.203463	0.4	-0.823529	-0.0769231	0.115385	0.142857	0.606557	0.387755	0.276596	-0.875	0.22449	0	-0.333333	0.904762	0.43662	0.22807	0.979798	0.285714	-0.294118	-0.888889	-0.0357143	0.555556
										0.853659	-0.153153	-0.866667	0.903382	0.894737	-0.666667	0.333333	-0.16	-0.87234	0.62069	-0.147059	-0.2	-0.333333	-0.475784	0.487179	-0.232323	0.72973	0.479452	0.203463	0.4	-0.823529	-0.0769231	0.115385	0.142857	0.606557	0.387755	0.276596	-0.875	0.22449	0	-0.333333	0.904762	0.43662	0.22807	0.979798	0.285714	-0.294118	-0.888889	-0.0357143	0.555556
										0.853659	-0.153153	-0.866667	0.903382	0.894737	-0.666667	0.333333	-0.16	-0.87234	0.62069	-0.147059	-0.2	-0.333333	-0.475784	0.487179	-0.150943	0.72973	0.493333	0.203463	0.4	-0.823529	-0.0769231	0.115385	0.142857	0.606557	0.387755	0.276596	-0.875	0.22449	0	-0.333333	0.904762	0.43662	0.22807	0.979798	0.285714	-0.294118	-0.888889	-0.0357143	0.555556
										0.853659	-0.153153	-0.866667	0.903382	0.894737	-0.666667	0.333333	-0.16	-0.87234	0.62069	-0.147059	-0.2	-0.333333	-0.475784	0.487179	-0.140187	0.72973	0.5	0.203463	0.4	-0.823529	-0.0769231	0.115385	0.142857	0.606557	0.387755	0.276596	-0.875	0.22449	0	-0.333333	0.904762	0.43662	0.22807	0.979798	0.285714	-0.294118	-0.888889	-0.0357143	0.555556
										0.853659	-0.153153	-0.866667	0.903382	0.894737	-0.666667	0.333333	-0.16	-0.87234	0.62069	-0.147059	-0.2	-0.333333	-0.475784	0.487179	-0.079646	0.72973	0.525	0.203463	0.4	-0.823529	-0.0769231	0.115385	0.142857	0.606557	0.387755	0.276596	-0.875	0.22449	0	-0.333333	0.904762	0.43662	0.22807	0.979798	0.285714	-0.294118	-0.888889	-0.0357143	0.555556
										0.853659	-0.153153	-0.866667	0.903382	0.894737	-0.666667	0.333333	-0.16	-0.87234	0.62069	-0.147059	-0.2	-0.333333	-0.475784	0.487179	-0.0608696	0.72973	0.563218	0.203463	0.4	-0.823529	-0.0769231	0.115385	0.142857	0.606557	0.387755	0.276596	-0.875	0.22449	0	-0.333333	0.904762	0.43662	0.22807	0.979798	0.285714	-0.294118	-0.888889	-0.0357143	0.555556
										0.853659	-0.153153	-0.866667	0.903382	0.894737	-0.666667	0.333333	-0.16	-0.87234	0.62069	-0.14956	-0.2	-0.333333	-0.475784	0.487179	-0.0517241	0.72973	0.582418	0.198276	0.4	-0.823529	-0.0769231	0.115385	0.142857	0.606557	0.387755	0.276596	-0.875	0.22449	0	-0.333333	0.904762	0.43662	0.22807	0.979798	0.285714	-0.294118	-0.888889	-0.0357143	0.555556
										0.853659	-0.153153	-0.866667	0.903382	0.894737	-0.666667	0.333333	-0.16	-0.87234	0.62069	-0.14956	-0.2	-0.333333	-0.476529	0.487179	0.00813008	0.72973	0.582418	0.177966	0.4	-0.823529	-0.0769231	0.115385	0.142857	0.606557	0.387755	0.276596	-0.875	0.22449	0	-0.333333	0.904762	0.43662	0.22807	0.979798	0.285714	-0.314286	-0.888889	-0.0357143	0.555556
										0.853659	-0.153153	-0.866667	0.903382	0.894737	-0.666667	0.333333	-0.16	-0.87234	0.62069	-0.14956	-0.2	-0.333333	-0.478753	0.487179	0.0393701	0.72973	0.582418	0.177966	0.4	-0.823529	-0.0769231	0.115385	0.142857	0.606557	0.387755	0.276596	-0.875	0.22449	0	-0.333333	0.904762	0.43662	0.22807	0.979798	0.285714	-0.333333	-0.888889	-0.0357143	0.555556
										0.853659	-0.153153	-0.866667	0.903382	0.894737	-0.666667	0.333333	-0.16	-0.87234	0.62069	-0.14956	-0.2	-0.333333	-0.479491	0.487179	0.0895522	0.72973	0.582418	0.177966	0.4	-0.823529	-0.0769231	0.115385	0.142857	0.606557	0.387755	0.276596	-0.875	0.22449	0	-0.333333	0.904762	0.43662	0.22807	0.979798	0.285714	-0.333333	-0.888889	-0.0357143	0.555556
										0.853659	-0.153153	-0.866667	0.903382	0.894737	-0.666667	0.333333	-0.16	-0.87234	0.62069	-0.14956	-0.2	-0.333333	-0.479491	0.487179	0.115942	0.72973	0.582418	0.177966	0.4	-0.823529	-0.0769231	0.115385	0.142857	0.606557	0.387755	0.276596	-0.875	0.22449	0	-0.333333	0.904762	0.43662	0.22807	0.979798	0.285714	-0.333333	-0.888889	-0.0357143	0.555556
										0.853659	-0.153153	-0.866667	0.903382	0.894737	-0.666667	0.333333	-0.16	-0.87234	0.62069	-0.14956	-0.2	-0.333333	-0.479491	0.487179	0.115942	0.72973	0.582418	0.177966	0.4	-0.823529	-0.0769231	0.115385	0.142857	0.606557	0.387755	0.276596	-0.875	0.22449	0	-0.333333	0.904762	0.43662	0.22807	0.979798	0.285714	-0.333333	-0.888889	-0.0357143	0.555556
										0.853659	-0.153153	-0.866667	0.903382	0.894737	-0.666667	0.333333	-0.16	-0.87234	0.62069	-0.14956	-0.2	-0.333333	-0.479491	0.487179	0.122302	0.72973	0.582418	0.177966	0.4	-0.823529	-0.0769231	0.115385	0.142857	0.606557	0.387755	0.276596	-0.875	0.22449	0	-0.333333	0.904762	0.43662	0.22807	0.979798	0.285714	-0.333333	-0.888889	-0.0357143	0.555556
										0.853659	-0.153153	-0.866667	0.903382	0.894737	-0.666667	0.333333	-0.16	-0.87234	0.62069	-0.14956	-0.2	-0.333333	-0.479491	0.487179	0.122302	0.72973	0.582418	0.177966	0.4	-0.823529	-0.0769231	0.115385	0.142857	0.606557	0.387755	0.333333	-0.875	0.22449	0	-0.333333	0.904762	0.43662	0.22807	0.979798	0.285714	-0.333333	-0.888889	-0.0357143	0.555556
										0.853659	-0.168142	-0.866667	0.903382	0.894737	-0.666667	0.333333	-0.16	-0.87234	0.62069	-0.14956	-0.2	-0.333333	-0.479491	0.487179	0.122302	0.72973	0.582418	0.177966	0.4	-0.823529	-0.0769231	0.115385	0.142857	0.606557	0.387755	0.423729	-0.875	0.22449	0	-0.333333	0.904762	0.43662	0.22807	0.979798	0.285714	-0.333333	-0.888889	-0.0357143	0.555556
										0.853659	-0.168142	-0.866667	0.903382	0.894737	-0.666667	0.333333	-0.16	-0.87234	0.62069	-0.14956	-0.2	-0.333333	-0.479491	0.487179	0.122302	0.72973	0.582418	0.177966	0.4	-0.823529	-0.0769231	0.115385	0.142857	0.606557	0.387755	0.433333	-0.875	0.22449	0	-0.333333	0.904762	0.43662	0.22807	0.979798	0.285714	-0.333333	-0.888889	-0.0357143	0.555556
										0.853659	-0.168142	-0.866667	0.903382	0.894737	-0.666667	0.333333	-0.16	-0.87234	0.62069	-0.14956	-0.2	-0.333333	-0.479491	0.487179	0.122302	0.72973	0.582418	0.177966	0.4	-0.823529	-0.0769231	0.115385	0.142857	0.606557	0.387755	0.433333	-0.875	0.22449	0	-0.333333	0.904762	0.43662	0.22807	0.979798	0.285714	-0.333333	-0.888889	-0.0357143	0.555556
										0.853659	-0.168142	-0.866667	0.903382	0.894737	-0.666667	0.333333	-0.16	-0.87234	0.62069	-0.14956	-0.2	-0.333333	-0.479491	0.487179	0.122302	0.72973	0.582418	0.177966	0.4	-0.823529	-0.0769231	0.115385	0.142857	0.606557	0.387755	0.433333	-0.875	0.22449	0	-0.333333	0.904762	0.43662	0.22807	0.979798	0.285714	-0.333333	-0.888889	-0.0357143	0.555556
										0.853659	-0.168142	-0.866667	0.903382	0.894737	-0.666667	0.333333	-0.16	-0.87234	0.62069	-0.14956	-0.2	-0.333333	-0.479491	0.487179	0.122302	0.72973	0.582418	0.177966	0.4	-0.823529	-0.0769231	0.115385	0.142857	0.606557	0.387755	0.433333	-0.875	0.22449	0	-0.333333	0.904762	0.43662	0.22807	0.979798	0.285714	-0.333333	-0.888889	-0.0357143	0.555556
										0.853659	-0.168142	-0.866667	0.903382	0.894737	-0.666667	0.333333	-0.16	-0.87234	0.62069	-0.14956	-0.2	-0.333333	-0.479491	0.487179	0.122302	0.72973	0.582418	0.177966	0.4	-0.823529	-0.0769231	0.115385	0.142857	0.606557	0.387755	0.433333	-0.875	0.22449	0	-0.333333	0.904762	0.43662	0.22807	0.979798	0.285714	-0.333333	-0.888889	-0.0357143	0.555556
										0.853659	-0.168142	-0.866667	0.903382	0.894737	-0.666667	0.333333	-0.16	-0.87234	0.62069	-0.14956	-0.2	-0.333333	-0.479491	0.487179	0.122302	0.72973	0.582418	0.177966	0.4	-0.823529	-0.0769231	0.115385	0.142857	0.606557	0.387755	0.433333	-0.875	0.22449	0	-0.333333	0.904762	0.43662	0.22807	0.979798	0.285714	-0.333333	-0.888889	-0.0357143	0.555556
										0.853659	-0.168142	-0.866667	0.903382	0.894737	-0.666667	0.333333	-0.16	-0.87234	0.62069	-0.14956	-0.2	-0.333333	-0.479491	0.487179	0.122302	0.72973	0.582418	0.177966	0.4	-0.823529	-0.0769231	0.115385	0.142857	0.606557	0.387755	0.433333	-0.875	0.22449	0	-0.333333	0.904762	0.43662	0.22807	0.979798	0.285714	-0.333333	-0.888889	-0.0357143	0.555556
										0.853659	-0.168142	-0.866667	0.903382	0.894737	-0.666667	0.333333	-0.16	-0.87234	0.62069	-0.14956	-0.2	-0.333333	-0.479491	0.487179	0.122302	0.72973	0.582418	0.177966	0.4	-0.823529	-0.0769231	0.115385	0.142857	0.606557	0.387755	0.433333	-0.875	0.22449	0	-0.333333	0.904762	0.43662	0.22807	0.979798	0.285714	-0.333333	-0.888889	-0.0526316	0.555556
										0.853659	-0.168142	-0.866667	0.903382	0.894737	-0.666667	0.333333	-0.16	-0.87234	0.62069	-0.156977	-0.2	-0.333333	-0.480959	0.487179	0.122302	0.72973	0.582418	0.177966	0.4	-0.823529	-0.0769231	0.115385	0.142857	0.606557	0.387755	0.433333	-0.875	0.22449	0	-0.333333	0.904762	0.43662	0.22807	0.979798	0.285714	-0.333333	-0.888889	-0.0526316	0.555556
										0.853659	-0.168142	-0.866667	0.903382	0.894737	-0.666667	0.333333	-0.16	-0.87234	0.62069	-0.169054	-0.2	-0.333333	-0.483871	0.487179	0.122302	0.72973	0.582418	0.177966	0.4	-0.823529	-0.0769231	0.115385	0.142857	0.606557	0.387755	0.433333	-0.875	0.22449	0	-0.333333	0.904762	0.43662	0.22807	0.979798	0.285714	-0.333333	-0.888889	-0.0526316	0.555556
										0.853659	-0.168142	-0.866667	0.903382	0.894737	-0.666667	0.333333	-0.16	-0.87234	0.62069	-0.169054	-0.2	-0.333333	-0.484594	0.487179	0.122302	0.72973	0.582418	0.177966	0.4	-0.823529	-0.0769231	0.115385	0.142857	0.606557	0.387755	0.433333	-0.875	0.22449	0	-0.333333	0.904762	0.43662	0.22807	0.979798	0.285714	-0.333333	-0.888889	-0.0526316	0.555556
										0.853659	-0.168142	-0.866667	0.903382	0.894737	-0.666667	0.333333	-0.16	-0.87234	0.62069	-0.171429	-0.2	-0.333333	-0.484594	0.487179	0.122302	0.72973	0.582418	0.177966	0.4	-0.823529	-0.0769231	0.115385	0.142857	0.606557	0.387755	0.433333	-0.875	0.22449	0	-0.333333	0.904762	0.43662	0.22807	0.979798	0.285714	-0.333333	-0.888889	-0.0526316	0.555556
										0.853659	-0.168142	-0.866667	0.903382	0.894737	-0.666667	0.333333	-0.16	-0.87234	0.62069	-0.171429	-0.2	-0.333333	-0.485315	0.487179	0.122302	0.72973	0.582418	0.177966	0.4	-0.823529	-0.0769231	0.115385	0.142857	0.606557	0.387755	0.433333	-0.875	0.22449	0	-0.333333	0.904762	0.43662	0.22807	0.979798	0.285714	-0.333333	-0.888889	-0.0526316	0.555556
										0.853659	-0.168142	-0.866667	0.903382	0.894737	-0.666667	0.333333	-0.16	-0.87234	0.62069	-0.171429	-0.2	-0.333333	-0.485315	0.487179	0.122302	0.72973	0.582418	0.177966	0.4	-0.823529	-0.0769231	0.115385	0.142857	0.606557	0.387755	0.433333	-0.875	0.22449	0	-0.333333	0.904762	0.43662	0.22807	0.979798	0.285714	-0.333333	-0.888889	-0.0526316	0.555556
										0.853659	-0.168142	-0.866667	0.903382	0.894737	-0.666667	0.333333	-0.16	-0.87234	0.62069	-0.171429	-0.2	-0.333333	-0.485315	0.487179	0.122302	0.72973	0.582418	0.177966	0.4	-0.823529	-0.0769231	0.115385	0.142857	0.606557	0.387755	0.433333	-0.875	0.22449	0	-0.333333	0.904762	0.43662	0.22807	0.979798	0.285714	-0.333333	-0.888889	-0.0526316	0.555556
										0.853659	-0.189655	-0.866667	0.903382	0.894737	-0.666667	0.333333	-0.16	-0.87234	0.62069	-0.171429	-0.2	-0.333333	-0.48675	0.487179	0.134752	0.72973	0.582418	0.177966	0.4	-0.823529	-0.0769231	0.115385	0.142857	0.606557	0.387755	0.433333	-0.875	0.22449	0	-0.333333	0.904762	0.43662	0.22807	0.979798	0.285714	-0.333333	-0.888889	-0.0526316	0.555556
										0.853659	-0.189655	-0.866667	0.903382	0.894737	-0.666667	0.333333	-0.16	-0.87234	0.62069	-0.171429	-0.2	-0.333333	-0.49101	0.487179	0.164384	0.72973	0.582418	0.177966	0.4	-0.823529	-0.0769231	0.115385	0.142857	0.606557	0.387755	0.433333	-0.875	0.22449	0	-0.333333	0.904762	0.43662	0.22807	0.979798	0.285714	-0.333333	-0.888889	-0.0526316	0.555556
										0.853659	-0.189655	-0.866667	0.903382	0.894737	-0.666667	0.333333	-0.16	-0.87234	0.62069	-0.171429	-0.2	-0.333333	-0.491713	0.487179	0.197368	0.72973	0.582418	0.177966	0.4	-0.823529	-0.0769231	0.115385	0.142857	0.606557	0.387755	0.433333	-0.875	0.22449	0	-0.333333	0.904762	0.43662	0.22807	0.979798	0.285714	-0.333333	-0.888889	-0.0526316	0.555556
										0.853659	-0.189655	-0.866667	0.903382	0.894737	-0.666667	0.333333	-0.16	-0.87234	0.62069	-0.171429	-0.2	-0.333333	-0.491713	0.487179	0.207792	0.72973	0.582418	0.177966	0.4	-0.823529	-0.0769231	0.115385	0.142857	0.606557	0.387755	0.433333	-0.875	0.22449	0	-0.333333	0.904762	0.43662	0.22807	0.979798	0.285714	-0.333333	-0.888889	-0.0526316	0.555556
										0.853659	-0.189655	-0.866667	0.903382	0.894737	-0.666667	0.333333	-0.16	-0.87234	0.62069	-0.171429	-0.2	-0.333333	-0.491713	0.487179	0.232704	0.72973	0.582418	0.177966	0.4	-0.823529	-0.0769231	0.115385	0.142857	0.606557	0.387755	0.433333	-0.875	0.22449	0	-0.333333	0.904762	0.43662	0.22807	0.979798	0.285714	-0.333333	-0.888889	-0.0526316	0.555556
										0.853659	-0.189655	-0.866667	0.903382	0.894737	-0.666667	0.333333	-0.16	-0.87234	0.62069	-0.171429	-0.2	-0.333333	-0.491713	0.487179	0.2375	0.72973	0.582418	0.177966	0.4	-0.823529	-0.0769231	0.115385	0.142857	0.606557	0.387755	0.433333	-0.875	0.22449	0	-0.333333	0.904762	0.43662	0.22807	0.979798	0.285714	-0.333333	-0.888889	-0.0526316	0.555556
										0.853659	-0.189655	-0.866667	0.903382	0.894737	-0.666667	0.333333	-0.16	-0.87234	0.62069	-0.171429	-0.2	-0.333333	-0.491713	0.487179	0.2375	0.72973	0.582418	0.177966	0.4	-0.823529	-0.0769231	0.115385	0.142857	0.606557	0.387755	0.433333	-0.875	0.22449	0	-0.333333	0.904762	0.43662	0.22807	0.979798	0.285714	-0.333333	-0.888889	-0.0526316	0.555556
										0.853659	-0.189655	-0.866667	0.903382	0.894737	-0.666667	0.333333	-0.16	-0.87234	0.62069	-0.171429	-0.2	-0.333333	-0.491713	0.487179	0.2375	0.72973	0.582418	0.177966	0.4	-0.823529	-0.0769231	0.115385	0.142857	0.580645	0.387755	0.433333	-0.875	0.22449	0	-0.333333	0.904762	0.43662	0.22807	0.979798	0.285714	-0.333333	-0.888889	-0.0526316	0.589744
										0.853659	-0.189655	-0.866667	0.903382	0.894737	-0.666667	0.333333	-0.16	-0.87234	0.62069	-0.171429	-0.2	-0.333333	-0.491713	0.487179	0.2375	0.72973	0.582418	0.177966	0.4	-0.823529	-0.0769231	0.115385	0.142857	0.342466	0.387755	0.433333	-0.875	0.22449	0	-0.333333	0.904762	0.43662	0.22807	0.979798	0.285714	-0.333333	-0.888889	-0.0526316	0.604938
										0.853659	-0.189655	-0.866667	0.903382	0.894737	-0.666667	0.333333	-0.16	-0.87234	0.62069	-0.171429	-0.2	-0.333333	-0.491713	0.487179	0.2375	0.72973	0.582418	0.177966	0.4	-0.823529	-0.0769231	0.115385	0.142857	0.342466	0.387755	0.433333	-0.875	0.22449	0	-0.333333	0.904762	0.43662	0.22807	0.979798	0.285714	-0.333333	-0.888889	-0.0526316	0.614458
										0.853659	-0.189655	-0.866667	0.903382	0.894737	-0.666667	0.333333	-0.16	-0.87234	0.62069	-0.171429	-0.2	-0.333333	-0.491713	0.487179	0.2375	0.72973	0.582418	0.177966	0.4	-0.823529	-0.0769231	0.115385	0.142857	0.342466	0.387755	0.433333	-0.875	0.22449	0	-0.333333	0.904762	0.43662	0.22807	0.979798	0.285714	-0.333333	-0.888889	-0.0526316	0.623529
										0.853659	-0.189655	-0.866667	0.903382	0.894737	-0.666667	0.333333	-0.16	-0.87234	0.62069	-0.171429	-0.2	-0.333333	-0.491713	0.487179	0.2375	0.72973	0.582418	0.177966	0.4	-0.823529	-0.0769231	0.115385	0.142857	0.342466	0.387755	0.433333	-0.875	0.22449	0	-0.333333	0.904762	0.43662	0.22807	0.979798	0.285714	-0.333333	-0.888889	-0.0526316	0.636364
										0.853659	-0.189655	-0.866667	0.903382	0.894737	-0.666667	0.333333	-0.16	-0.87234	0.62069	-0.171429	-0.2	-0.333333	-0.491713	0.487179	0.2375	0.72973	0.582418	0.177966	0.4	-0.823529	-0.0769231	0.115385	0.142857	0.342466	0.387755	0.433333	-0.875	0.22449	0	-0.333333	0.904762	0.43662	0.22807	0.979798	0.285714	-0.333333	-0.888889	-0.0526316	0.64045
										0.853659	-0.189655	-0.866667	0.903382	0.894737	-0.666667	0.333333	-0.16	-0.87234	0.62069	-0.171429	-0.2	-0.333333	-0.491713	0.487179	0.2375	0.72973	0.582418	0.177966	0.4	-0.823529	-0.0769231	0.115385	0.142857	0.342466	0.387755	0.433333	-0.875	0.22449	0	-0.333333	0.904762	0.43662	0.22807	0.979798	0.285714	-0.333333	-0.888889	-0.0526316	0.64045
										0.853659	-0.189655	-0.866667	0.903382	0.894737	-0.666667	0.333333	-0.16	-0.87234	0.62069	-0.171429	-0.2	-0.333333	-0.491713	0.487179	0.2375	0.72973	0.582418	0.177966	0.4	-0.823529	-0.0769231	0.115385	0.142857	0.342466	0.387755	0.433333	-0.875	0.22449	0	-0.333333	0.904762	0.43662	0.22807	0.979798	0.285714	-0.333333	-0.888889	-0.0526316	0.64045
										0.853659	-0.189655	-0.866667	0.903382	0.894737	-0.666667	0.333333	-0.16	-0.87234	0.62069	-0.171429	-0.2	-0.333333	-0.491713	0.487179	0.2375	0.72973	0.582418	0.177966	0.4	-0.823529	-0.0769231	0.115385	0.142857	0.342466	0.387755	0.433333	-0.875	0.22449	0	-0.333333	0.904762	0.43662	0.22807	0.979798	0.285714	-0.333333	-0.888889	-0.0526316	0.64045
										0.853659	-0.189655	-0.866667	0.903382	0.894737	-0.666667	0.333333	-0.16	-0.87234	0.62069	-0.171429	-0.2	-0.333333	-0.491713	0.487179	0.2375	0.72973	0.582418	0.177966	0.4	-0.823529	-0.0769231	0.115385	0.142857	0.342466	0.387755	0.433333	-0.875	0.22449	0	-0.333333	0.904762	0.43662	0.22807	0.979798	0.285714	-0.333333	-0.894737	-0.0526316	0.64045
										0.853659	-0.189655	-0.866667	0.903382	0.894737	-0.666667	0.333333	-0.16	-0.87234	0.62069	-0.171429	-0.2	-0.333333	-0.491713	0.487179	0.2375	0.72973	0.582418	0.177966	0.4	-0.823529	-0.0769231	0.115385	0.142857	0.342466	0.387755	0.433333	-0.875	0.22449	0	-0.333333	0.904762	0.43662	0.22807	0.979798	0.285714	-0.333333	-0.894737	-0.0526316	0.64045
										0.853659	-0.189655	-0.866667	0.903382	0.894737	-0.666667	0.333333	-0.16	-0.87234	0.62069	-0.171429	-0.2	-0.333333	-0.491713	0.487179	0.2375	0.72973	0.582418	0.177966	0.4	-0.823529	-0.0769231	0.115385	0.142857	0.342466	0.387755	0.433333	-0.875	0.22449	0	-0.333333	0.904762	0.43662	0.22807	0.979798	0.285714	-0.333333	-0.894737	-0.0526316	0.64045
										0.853659	-0.189655	-0.866667	0.903382	0.894737	-0.666667	0.333333	-0.16	-0.87234	0.62069	-0.171429	-0.2	-0.333333	-0.491713	0.487179	0.2375	0.72973	0.582418	0.177966	0.4	-0.823529	-0.0769231	0.115385	0.142857	0.342466	0.387755	0.433333	-0.875	0.22449	0	-0.333333	0.904762	0.43662	0.22807	0.979798	0.285714	-0.333333	-0.894737	-0.0526316	0.64045
										0.853659	-0.189655	-0.866667	0.903382	0.894737	-0.666667	0.333333	-0.16	-0.87234	0.62069	-0.171429	-0.2	-0.333333	-0.491713	0.487179	0.2375	0.72973	0.582418	0.177966	0.4	-0.823529	-0.0769231	0.115385	0.142857	0.342466	0.387755	0.433333	-0.875	0.22449	0	-0.333333	0.904762	0.43662	0.22807	0.979798	0.285714	-0.333333	-0.894737	-0.0526316	0.64045
										0.853659	-0.189655	-0.866667	0.903382	0.894737	-0.666667	0.333333	-0.16	-0.87234	0.62069	-0.171429	-0.2	-0.333333	-0.491713	0.487179	0.2375	0.72973	0.582418	0.177966	0.4	-0.823529	-0.0769231	0.115385	0.142857	0.342466	0.387755	0.433333	-0.875	0.22449	0	-0.333333	0.904762	0.43662	0.22807	0.979798	0.285714	-0.333333	-0.894737	-0.0526316	0.64045
										0.853659	-0.189655	-0.866667	0.903382	0.894737	-0.666667	0.333333	-0.16	-0.87234	0.62069	-0.171429	-0.2	-0.333333	-0.491713	0.487179	0.2375	0.72973	0.582418	0.177966	0.4	-0.823529	-0.0769231	0.115385	0.142857	0.342466	0.387755	0.433333	-0.875	0.22449	0	-0.333333	0.904762	0.43662	0.22807	0.979798	0.285714	-0.333333	-0.894737	-0.0526316	0.64045
										0.853659	-0.189655	-0.866667	0.903382	0.894737	-0.666667	0.333333	-0.16	-0.87234	0.62069	-0.171429	-0.2	-0.333333	-0.491713	0.487179	0.2375	0.72973	0.582418	0.177966	0.4	-0.823529	-0.0769231	0.115385	0.142857	0.342466	0.387755	0.433333	-0.875	0.22449	0	-0.333333	0.904762	0.43662	0.22807	0.979798	0.285714	-0.333333	-0.894737	-0.0526316	0.64045
										0.853659	-0.189655	-0.866667	0.903382	0.894737	-0.666667	0.333333	-0.16	-0.87234	0.62069	-0.171429	-0.2	-0.333333	-0.491713	0.487179	0.2375	0.72973	0.582418	0.177966	0.4	-0.823529	-0.0769231	0.115385	0.142857	0.342466	0.387755	0.433333	-0.875	0.22449	0	-0.333333	0.904762	0.43662	0.22807	0.979798	0.285714	-0.333333	-0.894737	-0.0526316	0.64045
										0.853659	-0.189655	-0.866667	0.903382	0.894737	-0.666667	0.333333	-0.16	-0.87234	0.62069	-0.171429	-0.2	-0.333333	-0.491713	0.487179	0.2375	0.72973	0.582418	0.177966	0.4	-0.823529	-0.0769231	0.115385	0.142857	0.342466	0.387755	0.433333	-0.875	0.22449	0	-0.333333	0.904762	0.43662	0.22807	0.979798	0.285714	-0.333333	-0.894737	-0.0526316	0.64045
										0.853659	-0.189655	-0.866667	0.903382	0.894737	-0.666667	0.333333	-0.16	-0.87234	0.62069	-0.171429	-0.2	-0.333333	-0.491713	0.487179	0.2375	0.72973	0.582418	0.177966	0.4	-0.823529	-0.0769231	0.115385	0.142857	0.342466	0.387755	0.433333	-0.875	0.22449	0	-0.333333	0.904762	0.43662	0.22807	0.979798	0.285714	-0.333333	-0.894737	-0.0526316	0.64045
										0.853659	-0.189655	-0.866667	0.903382	0.894737	-0.666667	0.333333	-0.16	-0.87234	0.62069	-0.171429	-0.2	-0.333333	-0.491713	0.487179	0.2375	0.72973	0.582418	0.177966	0.4	-0.823529	-0.0769231	0.115385	0.142857	0.342466	0.387755	0.433333	-0.875	0.22449	0	-0.333333	0.904762	0.43662	0.22807	0.979798	0.285714	-0.333333	-0.894737	-0.0526316	0.64045
										0.853659	-0.189655	-0.866667	0.903382	0.894737	-0.666667	0.333333	-0.16	-0.87234	0.62069	-0.171429	-0.2	-0.333333	-0.491713	0.487179	0.2375	0.72973	0.582418	0.177966	0.4	-0.823529	-0.0769231	0.115385	0.142857	0.342466	0.387755	0.433333	-0.875	0.22449	0	-0.333333	0.904762	0.43662	0.22807	0.979798	0.285714	-0.333333	-0.894737	-0.0526316	0.64045
										0.853659	-0.189655	-0.866667	0.903382	0.894737	-0.666667	0.333333	-0.16	-0.87234	0.62069	-0.171429	-0.2	-0.333333	-0.491713	0.487179	0.2375	0.72973	0.582418	0.177966	0.4	-0.823529	-0.0769231	0.115385	0.142857	0.342466	0.387755	0.433333	-0.875	0.22449	0	-0.333333	0.904762	0.43662	0.22807	0.979798	0.285714	-0.333333	-0.894737	-0.0526316	0.64045
										0.853659	-0.189655	-0.866667	0.903382	0.894737	-0.666667	0.333333	-0.16	-0.87234	0.62069	-0.171429	-0.2	-0.333333	-0.491713	0.487179	0.2375	0.72973	0.582418	0.177966	0.4	-0.823529	-0.0769231	0.115385	0.142857	0.342466	0.387755	0.433333	-0.875	0.22449	0	-0.333333	0.904762	0.43662	0.22807	0.979798	0.285714	-0.333333	-0.894737	-0.0526316	0.64045
										0.853659	-0.189655	-0.866667	0.903382	0.894737	-0.666667	0.333333	-0.16	-0.87234	0.62069	-0.171429	-0.2	-0.333333	-0.493113	0.487179	0.2375	0.72973	0.582418	0.177966	0.4	-0.823529	-0.0769231	0.115385	0.142857	0.342466	0.387755	0.433333	-0.875	0.22449	0	-0.333333	0.904762	0.43662	0.22807	0.979798	0.285714	-0.333333	-0.894737	-0.0526316	0.64045
										0.853659	-0.189655	-0.866667	0.903382	0.894737	-0.666667	0.333333	-0.16	-0.87234	0.62069	-0.171429	-0.2	-0.333333	-0.49658	0.487179	0.2375	0.72973	0.582418	0.177966	0.4	-0.823529	-0.0769231	0.115385	0.142857	0.342466	0.387755	0.433333	-0.875	0.22449	0	-0.333333	0.904762	0.43662	0.22807	0.979798	0.285714	-0.333333	-0.894737	-0.0526316	0.64045
										0.853659	-0.189655	-0.866667	0.903382	0.894737	-0.666667	0.333333	-0.16	-0.87234	0.62069	-0.171429	-0.2	-0.333333	-0.497268	0.487179	0.2375	0.72973	0.582418	0.177966	0.4	-0.823529	-0.0769231	0.115385	0.142857	0.342466	0.387755	0.433333	-0.875	0.22449	0	-0.333333	0.904762	0.43662	0.22807	0.979798	0.285714	-0.333333	-0.894737	-0.0526316	0.64045
										0.853659	-0.189655	-0.866667	0.903382	0.894737	-0.666667	0.333333	-0.16	-0.87234	0.62069	-0.171429	-0.2	-0.333333	-0.49932	0.487179	0.2375	0.72973	0.582418	0.177966	0.4	-0.823529	-0.0769231	0.115385	0.142857	0.342466	0.387755	0.433333	-0.875	0.22449	0	-0.333333	0.904762	0.43662	0.22807	0.979798	0.285714	-0.333333	-0.894737	-0.0526316	0.64045
										0.853659	-0.189655	-0.866667	0.903382	0.894737	-0.666667	0.333333	-0.16	-0.87234	0.62069	-0.171429	-0.2	-0.333333	-0.495935	0.487179	0.2375	0.72973	0.582418	0.177966	0.4	-0.823529	-0.0769231	0.115385	0.142857	0.342466	0.387755	0.433333	-0.875	0.22449	0	-0.333333	0.904762	0.43662	0.22807	0.979798	0.285714	-0.333333	-0.894737	-0.0526316	0.64045
										0.853659	-0.189655	-0.866667	0.903382	0.894737	-0.666667	0.333333	-0.16	-0.87234	0.62069	-0.171429	-0.2	-0.333333	-0.493911	0.487179	0.2375	0.72973	0.582418	0.177966	0.4	-0.823529	-0.0769231	0.115385	0.142857	0.342466	0.387755	0.433333	-0.875	0.22449	0	-0.333333	0.904762	0.43662	0.22807	0.979798	0.285714	-0.333333	-0.894737	-0.0526316	0.64045
										0.853659	-0.189655	-0.866667	0.903382	0.894737	-0.666667	0.333333	-0.16	-0.87234	0.62069	-0.171429	-0.2	-0.333333	-0.493911	0.487179	0.2375	0.72973	0.582418	0.177966	0.4	-0.823529	-0.0769231	0.115385	0.142857	0.342466	0.387755	0.433333	-0.875	0.22449	0	-0.333333	0.904762	0.43662	0.22807	0.979798	0.285714	-0.333333	-0.894737	-0.0526316	0.64045
										0.853659	-0.189655	-0.866667	0.903382	0.894737	-0.666667	0.333333	-0.16	-0.87234	0.62069	-0.171429	-0.2	-0.333333	-0.493911	0.487179	0.2375	0.72973	0.582418	0.177966	0.4	-0.823529	-0.0769231	0.115385	0.142857	0.342466	0.387755	0.433333	-0.875	0.22449	0	-0.333333	0.904762	0.43662	0.22807	0.979798	0.285714	-0.333333	-0.894737	-0.0526316	0.64045
										0.853659	-0.189655	-0.866667	0.903382	0.894737	-0.666667	0.333333	-0.16	-0.87234	0.62069	-0.171429	-0.2	-0.333333	-0.493911	0.487179	0.2375	0.72973	0.582418	0.177966	0.4	-0.823529	-0.0769231	0.115385	0.142857	0.342466	0.387755	0.433333	-0.875	0.22449	0	-0.333333	0.904762	0.43662	0.22807	0.979798	0.285714	-0.333333	-0.894737	-0.0526316	0.64045
										0.853659	-0.189655	-0.866667	0.903382	0.894737	-0.666667	0.333333	-0.16	-0.87234	0.62069	-0.171429	-0.2	-0.333333	-0.493911	0.487179	0.2375	0.72973	0.582418	0.177966	0.4	-0.823529	-0.0769231	0.115385	0.142857	0.342466	0.387755	0.433333	-0.875	0.22449	0	-0.333333	0.904762	0.43662	0.22807	0.979798	0.285714	-0.333333	-0.894737	-0.0526316	0.64045
										0.853659	-0.189655	-0.866667	0.903382	0.894737	-0.666667	0.333333	-0.16	-0.87234	0.62069	-0.171429	-0.2	-0.333333	-0.493911	0.487179	0.2375	0.72973	0.582418	0.177966	0.4	-0.823529	-0.0769231	0.115385	0.142857	0.342466	0.387755	0.433333	-0.875	0.22449	0	-0.333333	0.904762	0.43662	0.22807	0.979798	0.285714	-0.333333	-0.894737	-0.0526316	0.64045
										0.853659	-0.189655	-0.866667	0.903382	0.894737	-0.666667	0.333333	-0.16	-0.87234	0.62069	-0.171429	-0.2	-0.333333	-0.494595	0.487179	0.2375	0.72973	0.582418	0.177966	0.4	-0.823529	-0.0769231	0.115385	0.142857	0.342466	0.387755	0.433333	-0.875	0.22449	0	-0.333333	0.904762	0.43662	0.22807	0.979798	0.285714	-0.333333	-0.894737	-0.0526316	0.64045
										0.853659	-0.189655	-0.866667	0.903382	0.894737	-0.666667	0.333333	-0.16	-0.87234	0.62069	-0.171429	-0.2	-0.333333	-0.497987	0.487179	0.2375	0.72973	0.582418	0.177966	0.4	-0.823529	-0.0769231	0.115385	0.142857	0.342466	0.387755	0.433333	-0.875	0.22449	0	-0.333333	0.904762	0.43662	0.22807	0.979798	0.285714	-0.333333	-0.894737	-0.0526316	0.64045
										0.853659	-0.189655	-0.866667	0.903382	0.894737	-0.666667	0.333333	-0.16	-0.87234	0.62069	-0.171429	-0.2	-0.333333	-0.50266	0.487179	0.2375	0.72973	0.6	0.177966	0.4	-0.823529	-0.0769231	0.115385	0.142857	0.342466	0.387755	0.433333	-0.875	0.22449	0	-0.333333	0.904762	0.43662	0.22807	0.979798	0.285714	-0.333333	-0.894737	-0.0526316	0.64045
										0.853659	-0.189655	-0.866667	0.903382	0.894737	-0.666667	0.333333	-0.16	-0.87234	0.62069	-0.171429	-0.2	-0.333333	-0.50332	0.487179	0.2375	0.72973	0.6	0.177966	0.4	-0.823529	-0.0769231	0.115385	0.142857	0.342466	0.387755	0.433333	-0.875	0.22449	0	-0.333333	0.904762	0.43662	0.22807	0.979798	0.285714	-0.333333	-0.894737	-0.0526316	0.64045
										0.853659	-0.189655	-0.866667	0.903382	0.894737	-0.666667	0.333333	-0.16	-0.87234	0.62069	-0.171429	-0.2	-0.333333	-0.50332	0.487179	0.2375	0.72973	0.6	0.181435	0.4	-0.823529	-0.0769231	0.115385	0.142857	0.342466	0.387755	0.433333	-0.875	0.22449	0	-0.333333	0.904762	0.43662	0.22807	0.979798	0.285714	-0.333333	-0.894737	-0.0526316	0.64045
										0.853659	-0.189655	-0.866667	0.903382	0.894737	-0.666667	0.333333	-0.16	-0.87234	0.62069	-0.171429	-0.2	-0.333333	-0.50332	0.487179	0.2375	0.72973	0.6	0.201646	0.4	-0.823529	-0.0769231	0.115385	0.142857	0.342466	0.387755	0.34375	-0.875	0.22449	0	-0.333333	0.904762	0.43662	0.22807	0.979798	0.285714	-0.333333	-0.894737	-0.0526316	0.64045
										0.853659	-0.189655	-0.866667	0.903382	0.894737	-0.666667	0.333333	-0.16	-0.87234	0.62069	-0.171429	-0.2	-0.333333	-0.50332	0.487179	0.2375	0.72973	0.6	0.201646	0.4	-0.823529	-0.0769231	0.115385	0.142857	0.342466	0.387755	0.34375	-0.875	0.22449	0	-0.333333	0.904762	0.43662	0.22807	0.979798	0.285714	-0.333333	-0.894737	-0.0526316	0.569893
										0.853659	-0.189655	-0.866667	0.903382	0.894737	-0.666667	0.333333	-0.16	-0.87234	0.62069	-0.171429	-0.2	-0.333333	-0.50332	0.487179	0.2375	0.72973	0.6	0.201646	0.4	-0.823529	-0.0769231	0.115385	0.142857	0.342466	0.387755	0.34375	-0.875	0.22449	0	-0.333333	0.904762	0.43662	0.22807	0.979798	0.285714	-0.333333	-0.894737	-0.0526316	0.569893
										0.853659	-0.189655	-0.866667	0.903382	0.894737	-0.666667	0.333333	-0.16	-0.87234	0.62069	-0.171429	-0.2	-0.333333	-0.50332	0.487179	0.2375	0.72973	0.6	0.201646	0.4	-0.823529	-0.0769231	0.115385	0.142857	0.342466	0.387755	0.34375	-0.875	0.22449	0	-0.333333	0.904762	0.43662	0.22807	0.979798	0.285714	-0.333333	-0.894737	-0.0526316	0.569893
										0.853659	-0.189655	-0.866667	0.903382	0.894737	-0.666667	0.333333	-0.16	-0.87234	0.62069	-0.171429	-0.2	-0.333333	-0.50332	0.487179	0.2375	0.72973	0.6	0.201646	0.4	-0.823529	-0.0769231	0.115385	0.142857	0.342466	0.387755	0.34375	-0.875	0.22449	0	-0.333333	0.904762	0.43662	0.22807	0.979798	0.285714	-0.333333	-0.894737	-0.0526316	0.553191
										0.853659	-0.189655	-0.866667	0.903382	0.894737	-0.666667	0.333333	-0.16	-0.87234	0.62069	-0.171429	-0.2	-0.333333	-0.505945	0.487179	0.2375	0.72973	0.6	0.201646	0.4	-0.823529	-0.0769231	0.115385	0.142857	0.342466	0.387755	0.34375	-0.875	0.22449	0	-0.333333	0.904762	0.43662	0.22807	0.979798	0.285714	-0.333333	-0.894737	-0.0526316	0.553191
										0.853659	-0.189655	-0.866667	0.903382	0.894737	-0.666667	0.333333	-0.16	-0.87234	0.62069	-0.171429	-0.2	-0.333333	-0.510471	0.487179	0.2375	0.72973	0.6	0.201646	0.4	-0.823529	-0.0769231	0.115385	0.142857	0.342466	0.387755	0.34375	-0.875	0.22449	0	-0.333333	0.904762	0.43662	0.22807	0.979798	0.285714	-0.333333	-0.894737	-0.0526316	0.553191
										0.853659	-0.189655	-0.866667	0.903382	0.894737	-0.666667	0.333333	-0.16	-0.87234	0.62069	-0.171429	-0.2	-0.333333	-0.509138	0.487179	0.2375	0.72973	0.6	0.201646	0.4	-0.823529	-0.0769231	0.115385	0.142857	0.342466	0.387755	0.34375	-0.875	0.22449	0	-0.333333	0.904762	0.43662	0.22807	0.979798	0.285714	-0.351351	-0.894737	-0.0526316	0.553191
										0.853659	-0.189655	-0.866667	0.903382	0.894737	-0.666667	0.333333	-0.16	-0.87234	0.62069	-0.171429	-0.2	-0.333333	-0.497409	0.487179	0.2375	0.72973	0.6	0.201646	0.4	-0.823529	-0.0769231	0.115385	0.142857	0.342466	0.387755	0.34375	-0.875	0.22449	0	-0.333333	0.904762	0.43662	0.22807	0.979798	0.285714	-0.351351	-0.894737	-0.0526316	0.553191
										0.853659	-0.189655	-0.866667	0.903382	0.894737	-0.666667	0.333333	-0.16	-0.87234	0.62069	-0.171429	-0.2	-0.333333	-0.498059	0.487179	0.2375	0.72973	0.6	0.201646	0.4	-0.823529	-0.0769231	0.115385	0.142857	0.342466	0.387755	0.34375	-0.875	0.22449	0	-0.333333	0.904762	0.43662	0.22807	0.979798	0.285714	-0.351351	-0.894737	-0.0526316	0.553191
										0.853659	-0.189655	-0.866667	0.903382	0.894737	-0.666667	0.333333	-0.16	-0.87234	0.62069	-0.171429	-0.2	-0.333333	-0.496124	0.487179	0.2375	0.72973	0.6	0.201646	0.4	-0.823529	-0.0769231	0.115385	0.142857	0.342466	0.387755	0.34375	-0.875	0.22449	0	-0.333333	0.904762	0.43662	0.22807	0.979798	0.285714	-0.351351	-0.894737	-0.0526316	0.553191
										0.853659	-0.189655	-0.866667	0.903382	0.894737	-0.666667	0.333333	-0.16	-0.87234	0.62069	-0.171429	-0.2	-0.333333	-0.494194	0.487179	0.2375	0.72973	0.6	0.201646	0.4	-0.823529	-0.0769231	0.115385	0.111111	0.342466	0.387755	0.34375	-0.875	0.22449	0	-0.333333	0.904762	0.43662	0.22807	0.979798	0.285714	-0.351351	-0.894737	-0.0526316	0.553191
										0.853659	-0.189655	-0.866667	0.903382	0.894737	-0.666667	0.333333	-0.16	-0.87234	0.62069	-0.171429	-0.2	-0.333333	-0.494194	0.487179	0.2375	0.72973	0.6	0.201646	0.4	-0.823529	-0.0769231	0.115385	-0.0243902	0.342466	0.387755	0.34375	-0.875	0.22449	0	-0.333333	0.904762	0.43662	0.22807	0.979798	0.285714	-0.351351	-0.894737	-0.0526316	0.553191
										0.853659	-0.189655	-0.866667	0.903382	0.894737	-0.666667	0.333333	-0.16	-0.87234	0.62069	-0.171429	-0.2	-0.333333	-0.494845	0.487179	0.2375	0.72973	0.6	0.201646	0.4	-0.823529	-0.0769231	0.115385	-0.148936	0.342466	0.387755	0.34375	-0.875	0.22449	0	-0.333333	0.904762	0.43662	0.22807	0.979798	0.285714	-0.351351	-0.894737	-0.0526316	0.553191
										0.853659	-0.189655	-0.866667	0.903382	0.894737	-0.666667	0.333333	-0.16	-0.87234	0.62069	-0.171429	-0.2	-0.333333	-0.494845	0.487179	0.2375	0.72973	0.6	0.201646	0.4	-0.823529	-0.0769231	0.115385	-0.148936	0.342466	0.387755	0.34375	-0.875	0.22449	0	-0.333333	0.904762	0.43662	0.22807	0.979798	0.285714	-0.351351	-0.894737	-0.0526316	0.553191
										0.853659	-0.189655	-0.866667	0.903382	0.894737	-0.666667	0.333333	-0.16	-0.87234	0.62069	-0.171429	-0.2	-0.333333	-0.494845	0.487179	0.2375	0.72973	0.6	0.201646	0.4	-0.823529	-0.0769231	0.115385	-0.166667	0.342466	0.387755	0.34375	-0.875	0.22449	0	-0.333333	0.904762	0.43662	0.22807	0.979798	0.285714	-0.351351	-0.894737	-0.0526316	0.553191
[truncated: 2,289 more rows]
[truncated: 70 more columns]

## Sheet: c,d) MB504B LTM
Training					Testing				PI timecurve	testing
PI: ret -	PI:ret +	PI: +>Chrimson	PI:+>MB504B		PI: ret -	PI:ret +	PI: +>Chrimson	PI:+>MB504B		MB504B>CsChrimson ret +																											MB504B>CsChrimson ret -
[truncated: 3,601 more rows]
[truncated: 61 more columns]

## Sheet: e,f) R58E02 STM
Training					Testing				PI timecurves	testing
[truncated: 3,602 more rows]
[truncated: 100 more columns]

[truncated: 1 more sheets: g,h) R58E02 LTM]
