# Supplementary material for: Optogenetic induction of appetitive and aversive taste memories in Drosophila
Source: eLife. 2023 Sep 26;12:e81535. doi: 10.7554/eLife.81535 (PMC10561975; doi:10.7554/eLife.81535)
Supplement: Figure 3—source data 1. [file elife-81535-fig3-data1.xlsx]

## Sheet: a) Gr43a MB silenced STM
Training					Testing
PI :ret +, Gr43a>chrimson, R13F02>tnt	PI :ret +, Gr43a>chrimson, +>tnt	PI :ret +, Gr43a>+, R13F02>tnt			PI :ret +, Gr43a>chrimson, R13F02>tnt	PI :ret +, Gr43a>chrimson, +>tnt	PI :ret +, Gr43a>+, R13F02>tnt
0.9484	0.126437	0.80303			-0.414634	0.909574	0.865443
0.657143	0.470588	0.818396			-0.105263	0.856287	0.328671
0.78744	-0.0204082	0.87987			-0.785714	-0.324675	0.889655
0.5	0.487437	0.68254			-0.0120482	0.0344828	0.541667
0.925874	0.272727	0.0630631			-0.584	0.472222	0.45
0.828571	0.384615	0.777778			0.141667	0.356467	-0.673203
0.06	0.784615	0.936015			0.444444	-0.687805	0.299213
0.367347	-0.277372	0.363636			0.046875	0.988565	0.431856
0.791383	0.650672	0.798291			0.307263	0.0380117	0.047619
0.917293	0.153846	0.749004			-0.271111	0.132686	0.106996
0.557895	-0.152941	0.929155			0.692308	0.163265	0.566116
0.913775	0.896078	0.963218			-0.143791	0.391837	0.412334
0.852761	0.859734	0.745721			0.325843	0.423168	0.0181818
0.642157	0.959505	0.976517			0.142857	0.448276	0.0731707
0.855422	0.783186	0.877375			-0.236593	0.400749	0.917741
-0.206612	0.456343	0.935256			-0.243902	0.93865	0.992199
0.543307	0.897135	0.856802			0.352941	0.782205
0.839009	0.830803	0.516088			-0.00187617
0.557895	0.854711	0.916084			0.25
0.767742	0.529101	0.427793			-0.717391
0.553571	0.896679	0.935047			-0.635688
0.882353		0.89243			0.554192
0.906937		0.985915			-0.257143
0.808279		0.00440529
0.40146
0.283582
0.794337
0.830986
0.606987
0.865894
0.937276
0.714286

## Sheet: b) Gr43a MB silenced LTM
Training					Testing
PI :ret +, Gr43a>chrimson, R13F02>tnt	PI :ret +, Gr43a>chrimson, +>tnt	PI :ret +, Gr43a>+, R13F02>tnt			PI :ret +, Gr43a>chrimson, R13F02>tnt	PI :ret +, Gr43a>chrimson, +>tnt	PI :ret +, Gr43a>+, R13F02>tnt
0.979463	0.695122	0.987063			0.463054	0.0344828	0.75
0.411765	0.326087	0.976907			-0.710145	0.54717	-0.239819
0.94614	0.357059	0.545455			-0.0841121	0.995259	-0.368421
0.25303	0.859397	0.812672			-0.155556	-0.780711	0.233645
0.623762	0.766268	0.867508			0.179487	-0.869859	0.366492
0.84252	0.753759	0.635674			-0.871626	0.502762	0.481481
0.645813	0.835769	0.692559			0.470588	0.888889	0.41157
0.80786	0.883991	-0.474359			-0.49004	0.483871	-0.278912
-0.304348	0.904068	0.834938			-0.261324	-0.117012	0.984917
0.626841	0.64557	0.826531			0.543103	0.669065	0.44717
0.809836	0.523002	0.266667			-0.0928962	0.9125	0.704
0.0285714	0.439689	0.780142			0.0473684	0.622047	-0.880478
0.93757	0.810526	0.985658			-0.142405	0.673414	0.717391
0.110294	0.964646	0.747228			0.199105	-0.512468
0.71401	0.852317	0.698592			-0.617318	0.666667
0.0434783	0.892761	-0.854167			0.375	0.268293
-0.0365359	0.157895	0.789142			-0.261261	0.326923
0.593482	-0.365854	0.387755			-0.852814	-0.204969
0.819464	0.2103	0.956164			-0.828235
0.769821	0.883871	0.272727			-0.787133
0.882353					-0.0897778
-0.533981					-0.576182
0.899666					0.131222
					-0.29798
					0.00657895
					0.222222
					-0.888268

## Sheet: c) R58E02 MB silenced STM
Training					Testing
PI :ret +, R58E02>chrimson, R13F02>tnt	PI :ret +, R58E02>chrimson, +>tnt	PI :ret +, R58E02>+, R13F02>tnt			PI :ret +, R58E02>chrimson, R13F02>tnt	PI :ret +, R58E02>chrimson, +>tnt	PI :ret +, R58E02>+, R13F02>tnt
-0.6875	-0.189189	-0.6			-0.651376	-0.0793651	0.05
-0.723502	-0.782609	-0.438596			-0.111111	-0.607143	0.636943
-0.366667	-0.72093	-0.94382			0.158088	0.417476	0.308057
-0.466667	-0.391304	0.655172			-0.732283	-0.0983607	-0.792453
-0.356522	-0.263158	0.107143			-0.936	-0.254237	0.416149
0.142857	-0.206943	-0.181818			-0.963783	0.421053	-0.0454545
0.710526	-0.484536	0.16129			-0.586207	0.555556	0.64751
0.581395	0.288889	0.142857			0.311953	0.667158	-0.874286
0.0447761	0.342857	0.1			-0.230769	-0.261364	0.795349
0.176471	-0.230769	-0.575758			-0.285714	-0.207317	0.971691
-0.614973	-0.0909091	-0.517857			0.186441	0.108974	0.793103
0.232068	-0.558824	-0.655172			-0.0526316	-0.259843	0.0920245
-0.454545	0.0442478	0.371429			0.931818	0.878361	0.586639
0.147059	0.985319	-0.115044			-0.975477	-0.0366972	0.623529
-0.791667	-0.701493	-0.852632			-0.481481	0.0615385	-0.320843
0.702128	-0.891566	0.142857			-0.969231	0.171975	-0.242424
-0.698413	-0.358025	0.787234			0.139073	0.461538	-0.0769231
-0.411765	-0.363636	0.446541			-0.116279	0.666667	0.0789474
-0.148148	-0.770492	-0.861148			-0.506276	0.684211	0.0469799
0.52381	0.537092	0.59309			0.939086	0.886121	0.0452962
0.42	0.0196078	0.594203			0.1341	0.715702	0.279188
-0.92674	0.957447	-0.548611			-0.170029	0.862687	0.881657
-0.185185	0.152941	0.588235			0.653061	0.273973	0.440816
0.8	-0.2	-0.472222			-0.979381	-0.016	0.142857
	0.2	0.0952381				0.95723	0.599119
		-0.28				-0.40678	0.637329
						0.741573	0.815951
						0.0883512

## Sheet: d) R58E02 MB silenced LTM
Training					Testing
PI :ret +, R58E02>chrimson, R13F02>tnt	PI :ret +, R58E02>chrimson, +>tnt	PI :ret +, R58E02>+, R13F02>tnt			PI :ret +, R58E02>chrimson, R13F02>tnt	PI :ret +, R58E02>chrimson, +>tnt	PI :ret +, R58E02>+, R13F02>tnt
-0.0381679	0.119403	-0.811209			-0.12605	-0.108614	0.69697
0.425	-0.423729	-0.199571			-0.2	-0.12844	-0.232704
-0.108108	-0.296296	-0.0909091			-0.238095	0.519022	-0.36
-0.0434783	0.272727	0.717791			-0.81982	0.67382	-0.157895
0.834625	-0.409091	0.00578035			0.302326	0.87013	0.855117
-0.744292	0.391304	-0.92966			0.134615	0.26484	0.577778
0.642361	-0.459459	0.282051			-0.186047	-0.112782	0.940678
0.917127	0.190476	0.16			-0.236782	0.931624	0.620106
-0.222672	0.945419	0.625			0.333333	0.764706	0.351351
-0.260274	0.166667	0.932331			0.947115	0.85	0.414013
-0.220339	-0.0869565	-0.904215			-0.582857	0.0946882	0.278689
-0.861111	-0.596154	-0.4			-0.114894	0.0272109	0.957968
-0.0769231	0.563218	-0.416216			-0.0151515	-0.412141	0.12
-0.0344828	0.362776	0.376623			0.223579	0.121693	0.05
-0.652174	-0.659574	0.6			-0.440404	0.976408	0.636943
0.05	-0.722222	0.296296			-0.445783	0.171504	0.308057
0.74359	0.333333	-0.5			0.145631	0.95389	0.416149
-0.333333	0.904153	-0.903226			-0.639752
0.851852	0.985185	-0.855856			0.684211
-0.191011	0.60396	0.625			-0.964226
0.36	-0.372549				-0.126984
-0.185185
-0.0628571

## Sheet: e) R58E02 cyclohexamide
Training			Testing
R58E02>chrimson, ret +, cyclohexamide +	R58E02>chrimson, ret +, cyclohexamide -		R58E02>chrimson, ret +, cyclohexamide +	R58E02>chrimson, ret +, cyclohexamide -
-0.861111	-0.106918		-0.0420168	-0.291339
-0.16129	0.7		-0.798561	0.716981
0.294574	-0.8375		-0.858268	-0.272031
-0.860465	0.132075		-0.707317	0.72093
0.461538	0.75		0.617904	-0.326316
0.295775	-0.473118		0.473684	0.241379
-0.381818	0.483871		-0.660606	-0.693548
-0.0447761	0.818182		0.130435	0.707865
0.944444	0.488889		-0.671958	0.340426
-0.931973	0.416667		0.0697674	0.88587
-0.442786	-0.367089		-0.255319	0.0634146
0.26087	0.909091		-0.25	0.363636
0.0614525	-0.984416		0.690476	-0.137931
-0.745098	0.807692		-0.267974	0.387387
-0.628571	-0.375		-0.793413	0.12
-0.630058	-0.762963		-0.544186	0.538462
-0.836735	-0.319444		0.144231	0.758242
-0.819672	-0.931507			0.553571
0.924528	-0.590062			0.263598
0.614035	0.306122			-0.25
	0.846154			0.118644
	-0.539568			0.288889
