# Supplementary material for: Optogenetic induction of appetitive and aversive taste memories in Drosophila
Source: eLife. 2023 Sep 26;12:e81535. doi: 10.7554/eLife.81535 (PMC10561975; doi:10.7554/eLife.81535)
Supplement: Figure 4—figure supplement 1—source data 1. [file elife-81535-fig4-figsupp1-data1.xlsx]

## Sheet: A) MB299B STM
MB299B
training		testing
ret+	ret -	ret+	ret -
0.0697674	0.378641	-0.358491	0.619048
-0.027027	-0.111111	0.753304	-0.027933
-0.0769231	-0.575758	0.245714	-0.166667
-0.150685	0.36	-0.424658	0.615385
-0.147541	0.336683	-0.0543478	-0.195946
0.0461539	0.0486891	0.214953	-0.275591
-0.226519	0.00440529	0.195767	-0.6
-0.365385	-0.820896	-0.482927	0.0819672
0.107143	-0.277457	0.848014	-0.742775
-0.355556	0.766423	-0.0482315	-0.0232558
-0.586207	0.363636	0.296443	0.552239
-0.624309	-0.432836	-0.378151	0.115385
-0.806452	-0.04	-0.706667	0.435685
-0.265823	-0.659574	0.518518	0.385827
-0.302326	-0.20339	-0.0142857	0.364706
-0.204545	-0.113725	-0.0111524	0.280423
0.481482	0.295598	0.0980392	-0.738462
0.368421	0.189189	0.495652	0.794118
-0.448029	0.672727	0.796178
		0.692308
		0.333333
		0.932026
		0.756098

## Sheet: MB299B LTM
MB299B
training		testing
ret+	ret -	ret+	ret -
0.133333	0.380074	0.582979	-0.61194
0.0810811	0.894347	0.584	0.410138
-0.103448	-0.421687	0.230769	0.169231
-0.615385	0.76699	0.907389	-0.207317
-0.2	0.323232	0.561798	-0.261993
0.382979	-0.976471	-0.538462	-0.222892
0.5625	0.818285	0.15427	-0.0447309
-0.556962	0.428571	0.517778	0.248598
0.411765	-0.0361446	0.12816	0.838961
0.739726	0.350126	0.840516	-0.570533
0.173913	0.376	0.797101	0.438298
-0.508197	0.460317	0.308151	0.435583
-0.444444	0.247706	0.706522	0.827298
-0.030303	0.0243902	0.447964	0.656376
-0.131034	0.604651	0.22449	0.208122
-0.0839161	-0.0105263	-0.26045	-0.989318
-0.633333	0.502591	0.479432	0.037037
-0.44186	-0.0769231	0.469194	0.560976
0.454545	-0.84141	0.915709	-0.111111
-0.417625	-0.636364	0.714286	-0.844961
-0.609756	-0.39785	0.80083	0.317073
-0.230769	-0.706667	0.676724
0.544555	0.457143	0.0666667
-0.217391		-0.140127
0.284404		0.410256
0.478992
-0.0074074
-0.162791
