# Supplementary material for: Optogenetic induction of appetitive and aversive taste memories in Drosophila
Source: eLife. 2023 Sep 26;12:e81535. doi: 10.7554/eLife.81535 (PMC10561975; doi:10.7554/eLife.81535)
Supplement: Figure 4—source data 1. [file elife-81535-fig4-data1.xlsx]

## Sheet: a) R48B04 STM
Training			Testing
PI: ret -	PI:ret +		PI: ret -	PI:ret +
-0.237164	-0.73494		-0.316159	-0.0981818
-0.0875912	-0.755102		-0.375	0.278146
0.693878	-0.666667		0.126104	0.392265
-0.184314	-0.594937		-0.204611	0.125
-0.44	0.921638		-0.2288	-0.563981
-0.691589	-0.0384615		-0.872727	0.152941
-0.752941	0.473684		0.0153061	-0.285
-0.810289	-0.308642		-0.0997151	-0.621622
-0.4375	-0.509091		-0.774011	-0.223819
-0.537071	-0.519481		0.328084	0.625344
-0.838298	-0.672727		-0.325	-0.373068
0.031746	-0.615854		-0.663082	0.49226
0.515152	-0.75		-0.780488	-0.142149
0.4	0.5		-0.521531	-0.0431373
0.648649	-0.745098		-0.742664	0.529412
0.259259	-0.606612		-0.15625	0.228571
-0.846154	0.712803		-0.370717	0.0742358
-0.375	0.683698		0.693878	0.0472103
0.478109	0.695594		0.0465116	0.112903
0.323383	-0.326923		-0.157233	0.706422
0.537549	0.847239		0.224586	0.220339
-0.466667	-0.368421			0.257143
-0.170732	0.482105			0.40339
	-0.354037			-0.224
	-0.681818			-0.262136
	0.940828
	0.0857143
	0.139665

## Sheet: b) R48B04 LTM
Training			Testing
PI: ret -	PI:ret +		PI: ret -	PI:ret +
-0.538462	0.166667		0.127849	0.351759
-0.893617	-0.174312		0.19802	-0.645669
-0.291803	-0.792683		0.686747	0.357664
-0.371429	-0.3		0.596059	0.267887
-0.0186335	-0.3125		-0.927199	0.255319
0.802269	-0.678571		-0.409836	-0.216
0.599119	0.669421		-0.195745	-0.494891
0.788114	0.0153846		-0.339888	-0.739414
-0.726027	0.402844		-0.177273	0.517045
0.591508	-0.125		0.522777	-0.247706
0.780558	-0.0955414		0.0948617	-0.49345
0.431925	-0.813333		0.253012	0.252632
-0.785714	-0.810169		0.829412	0.19337
-0.631902	0.29575		-0.174737	-0.146341
-0.488584	-0.0840752		0.144509	0.786618
-0.576923			0.0481013	0.118577
0.363636			-0.76	-0.411765

## Sheet: c) R15A04 STM
Training			Testing
PI: ret -	PI:ret +		PI: ret -	PI:ret +
-0.897436	0.142857		-0.13242	0.378378
0.08	-0.621622		-0.0464135	0.425926
0.887446	-0.166667		0.292683	-0.0268817
0.6	0		0.911504	-0.709544
0.392	0.212766		0.150442	-0.860262
0.784946	-0.922807		-0.446154	0.187097
0.56129	-0.283465		-0.464481	0.365019
0.611111	-0.111111		-0.509025	0.0810811
-0.852459	0.621399		-0.662338	0.151335
-0.746479	-0.181818		-0.101504	0.0526316
-0.125	0.266667		0.561062	-0.121762
-0.0434783	0.74359		0.640303
-0.3	-0.8		0.327948
-0.733333			0.532091
0.478261

## Sheet: d) R15A04 LTM
Training			Testing
PI: ret -	PI:ret +		PI: ret -	PI:ret +
0.444089	-0.727273		-0.384615	0.155556
0.26145	0.0175439		-0.159923	0.641577
0.6	-0.458824		-0.73384	-0.0689655
0.00440529	0.428571		0.473282	-0.83908
0.340659	-0.285714		-0.0763889	0.263598
-0.296375	-0.00763359		0.429429	0.0309278
0.672897	-0.536232		-0.647059	0.292605
0.524752	-0.738095		0.728571	0.443243
-0.276596	0.0909091		0.607843	0.802875
0.460055	-0.0425532		-0.929204	0.678571
0.315789	-0.615385		0.445887	0.546942
-0.5	0.107143		-0.223301	0.395349
0.157895	-0.261146		-0.182724	0.913621
-0.46875	0.0454545		-0.177966	-0.6
0.432432	0.698113		-0.743066	-0.896353
-0.871795	0		0.171598	-0.152805
-0.28	-0.485714		0.0139276	0.754424
-0.714286	0.16129		0.268542	0.55794
-0.230769	0.269841		-0.575025	0.867095
-0.126437	0.298507		-0.933237	0.207692
-0.251534	0.24359		-0.632911
0.117647	-0.311532		-0.134454
0.0526316			-0.22
			-0.733333
			0.48503
			-0.257019
			-0.911765

## Sheet: e) MB043B STM
Training			Testing
PI: ret -	PI:ret +		PI: ret -	PI:ret +
0.553236	0.719807		0.333333	0.025974
-0.87935	0.01875		0.285714	-0.229974
-0.5	-0.256198		-0.130045	0.014975
0.17037	0.0769231		-0.704348	0.230769
0.484277	0.00869565		-0.164179	-0.907445
-0.182266	-0.189189		-0.217391	-0.172222
-0.62963	-0.653333		-0.0714286	-0.177033
0.120921	-0.00199601		-0.223684	-0.315436
-0.181435	-0.465116		-0.709091	-0.361257
0.127168	-0.333333		0.103448	0.27395
0.0699088	0.562842		-0.0222222	-0.0242215
0.218605	-0.319728			-0.0116279
	0.577465			0.652174
	-0.518717			0.453988

## Sheet: f) MB043B LTM
Training			Testing
PI: ret -	PI:ret +		PI: ret -	PI:ret +
0.25	0.342636		-0.208054	0.536946
0.596154	-0.0751174		-0.787234	0.613599
0.666667	0.25		-0.747826	-0.719136
0.614907	0.257143		0.399317	0.542254
0.189655	0.2891		0.304075	0.696697
-0.381818	0.00699301		-0.278846	0.895025
-0.176471	0.613596		-0.017301	0.0909091
-0.230769	0.293478		-0.568182	0.308776
-0.45679	-0.75		0.481481	0.746073
-0.25	-0.708333		0.0570825	-0.135952
-0.74359	0.245902		-0.162791	-0.285024
-0.552941	0.0394737		0.579909	0.874269
-0.327684	0.592391		-0.704545	0.758333
0.461728	-0.302326		0.687732	0.704225
-0.754011	0.592593		-0.248619	0.572327
0.089317	-0.797203		-0.675676	0.6875
0.318182	0.409449		0.961749	0.0384615
-0.913043	0.62069		0.399491	0.961814
0.460993	-0.75		-0.245192	0.78022
0.723724	-0.12766		0.466667
0.308642	0.267925
	0.037037

## Sheet: g) MB301B STM
Training			Testing
PI: ret -	PI:ret +		PI: ret -	PI:ret +
0.772358	0.921569		0.952064	0.591981
0.552448	0.684211		-0.0358398	-0.346049
0.635605	0.746193		-0.696552	-0.162162
-0.0754717	0.317073		0.654485	0.266881
0.0196078	0.815094		0.457014	0.565107
0.907368	0.382637		0.885976	0.716535
0.297297	0.783333		0.758175	0.560311
0.330579	0.945268		0.829457	-0.395349
-0.410072	-0.0497738		0.577778	-0.0322581
0.181818	0.647059		0.179283	0.728571
0.512195	0.558313		0.25	0.251534
-0.00869565	0.198113		-0.707317	-0.376761
-0.458333	0.805825		0.217391	-0.229236
-0.454545	0.026738		0.100257	0.481481
0.673469	-0.0140845		0.318621	0.00694444
0.0643275	0.755102		-0.317881	-0.13242
-0.508772	0.806897		0.496183	0.380711
0.424242	0.524664		-0.0532319	-0.0666667
0.724138	0.223022		-0.0232558	-0.437722
0.134615	0.438849		-0.251613	0.65019
-0.220126	0.626374			0.025641
-0.397436	0.654135			-0.409396
0.365854				-0.861702
0.141463				-0.4
-0.549669
0.571429
0.404762

## Sheet: h) MB301B LTM
Training			Testing
PI: ret -	PI:ret +		PI: ret -	PI:ret +
0.266055	0.723577		0.0808314	-0.128748
0.00636943	0.719368		-0.634146	0.0234114
-0.47619	0.712821		-0.130435	-0.381295
0.257073	0.428283		0.0792839	-0.367521
0.828283	0.524752		0.162791	-0.504425
0.697543	0.738053		0.461078	-0.609756
-0.168142	0.316384		-0.336283	0.169811
-0.112821	0.500924		0.335394	-0.586207
0.59276	0.6		0.150442	-0.540636
0.212121	-0.0841751		0.222222	0.612245
-0.302181	0.465587			-0.0728477
	0.807487			-0.435583
	0.293286
	0.477593
	0.380952
