# Supplementary material for: Optogenetic induction of appetitive and aversive taste memories in Drosophila
Source: eLife. 2023 Sep 26;12:e81535. doi: 10.7554/eLife.81535 (PMC10561975; doi:10.7554/eLife.81535)
Supplement: Figure 5—source data 1. [file elife-81535-fig5-data1.xlsx]

## Sheet: Sheet1
Training
no: sucrose	+: sucrose	>7hrs sucrose	-	no: lactic acid	+: lactic acid	>lactic acid	-	no: yeast extract	+: yeast extract	>yeast extract	-	no: l-ala	+: l-ala	>7: l-ala	-	no: l-glucose	+: l-glucose	>7: l-glucose	-	no: l-aspartic acid	+: l-aspartic acid	>7: l-aspartic acid
-0.762238	-0.804878	-0.61165		-0.65625	-0.636364	-0.5		0.30303	0.275362	0.192308		-0.469027	-0.333333	0.528302		-0.895349	-0.5	0.272727		0.75	-0.581395	0
0.288461	-0.212903	0.190476		0.0588235	-0.53125	-0.568627		-0.111111	-0.578125	0.233333		0.627119	-0.466667	-0.666667		0.590909	-0.615385	0.0408163		0.6	-0.05	-0.585366
0.175258	0.511811	-0.117647		0.445545	-0.698324	-0.285714		-0.44898	0.1	-0.348315		-0.78355	-0.675	-0.363636		0.425287	0.1	0.145455		0.333333	0.08	-0.696202
-0.117647	-0.431579	0.438202		-0.00770077	-0.721854	0.340425		-0.478261	-0.747899	-0.811024		-0.166667	-0.731707	0.785714		0.288889	-0.384615	0.35		-0.660869	-0.852632	-0.28
-0.272727	-0.6	0.0714286		-0.402299	0.378378	-0.585106		-0.438202	0.025641	0.619048		0.754527	-0.3125	-0.74359		-0.675676	0.176471	-0.791667		0.916376	0.44186	-0.333333
0.552941	0.170213	-0.698925		-0.76	0.117647	-0.787234		-0.573034	0.244444	-0.846154		-0.314286	-0.448276	-0.375		0.111111	-0.24	0.304348		-0.438597	0.810277	-0.68
0.277778	0.343512	0.283582		-0.836066	0.851852	0.389831		0.11828	-0.425	-0.898833		-0.155556	-0.448276	0.0943396		0.0676692	0.432836	-0.0322581		0.507692	0.272727	-0.27003
0.156682	0.811321	-0.918129		-0.222222	-0.192983	0.0596027		-0.690141	0.560976	-0.553571		0.831776	-0.12	-0.669903		0.478261	-0.636364	0.454545		0.330738	0.813953	0
-0.671533	-0.28	0.491525		0.438202	0.29703	-0.45946		0.549133	-0.409091	0.586777		0.7	0.111111	-0.653846		-0.642857	-0.409524	-0.111111		0.220339	0.709677	-0.150443
-0.333333	-0.39759	-0.483871		0.0657895	-0.428571	-0.563636		0.457627	-0.835051	-0.862069		0.225806	0.796226	0.142857		0.767442	-0.639344	-0.55		-0.225806	0.111111	-0.753247
-0.58	-0.310345	0.478261		0.853035	0.543408	-0.644444		-0.0851064	-0.386364	-0.744361		-0.678571	-0.23913	-0.9		-0.306931	0.814815	-0.857143		-0.352941	-0.232877	0.868476
-0.190311	-0.566265	-0.375		-0.328671	-0.405405	-0.707692		0.539192	0.393939	-0.236842		0.409091	-0.768595	-0.744681		-0.869159	-0.818182	0.371134		0.571134	0.382353	0.420765
-0.263158	0.6	-0.578947		-0.881356	-0.310044	-0.839286		0.620192	-0.428571	-0.100775		-0.816901	-0.588235	0.362319		-0.4375	-0.407407	0.655172		-0.54386	-0.025641	0.588235
-0.341176	0.25	0.111111		-0.606061	0.272727	0.142857		-0.0476191	0.31677	-0.217391		-0.176471	-0.145833	-0.6		-0.735849	-0.155556	0.333333		-0.229167	-0.605096	0.122807
0.165354	0.56044	-0.617647		0.2	-0.678571	-0.675676		0.278689	-0.924528	-0.0060606		-0.0526316	0.631068	-0.78125		0.471545	0.687924	-0.402299		-0.261905	-0.748744	0.864865
-0.834254	0.69697	-0.314286		-0.528455	-0.72619	-0.525424		0.424242	-0.266667			-0.445783	0.0833333	0.3		0.029703	-0.641618	-0.0769231		-0.912621	0.340909
-0.421687	-0.846154	0.76947		-0.787879	-0.85	0.277778		0.277567	-0.928251			-0.0566038	0.358491	-0.79798		0.283582	-0.0697674	0.360465		-0.166667	-0.416667
-0.659259	-0.0927835	0.298246		-0.513513	0.362745	0.434783		0.444445	0.62963				-0.777778			-0.7375	-0.12069	0.5			-0.0958904
-0.948718	0.707317	-0.186047		0.550239	-0.225806	0.777778		-0.125	-0.623037				0.666667				-0.622047	-0.290323			-0.0583333
-0.522124	-0.29064			0.219512	-0.319588	0.32		-0.542169	-0.130435				0.887006					-0.197368			0.0714286
0.233161	-0.910448			-0.583333	-0.652174	0.807692							-0.454545					0.186813			0.509434
0.694118	0.0476191			0.185185	-0.677966	0.467354
0.881002	-0.76324			-0.230769	-0.15625	-0.0769231
0.126437	-0.742857			-0.317073	0.657143	-0.375
0.362162					0.516129	-0.59375
0.0551724					-0.15	0.323944
					0.564706	0.797468
					0.371429
Testing
no: sucrose	+: sucrose	>7hrs sucrose	-	no: lactic acid	+: lactic acid	>lactic acid	-	no: yeast extract	+: yeast extract	>yeast extract	-	no: l-ala	+: l-ala	>7: l-ala	-	no: l-glucose	+: l-glucose	>7: l-glucose	-	no: l-aspartic acid	+: l-aspartic acid	>7: l-aspartic acid
0.333333	-0.0410959	-0.852761		0.585903	-0.21673	-0.971861		0.142857	-0.224138	0.0590909		0.369231	0.268542	0.196581		-0.953398	-0.88743	0.810982		0.651498	0.81573	0.00740741
-0.457143	0.731602	0.322034		-0.778553	0.0636364	0.0650746		0.46281	-0.382716	-0.774925		0.282869	0.730419	-0.937578		-0.79017	0.72	-0.914373		0.693431	0.255696	0.767372
0.129239	0.707317	0.396226		-0.255319	0.151007	-0.20548		-0.0520394	0.872181	-0.347541		-0.977565	-0.829642	-0.355828		0.560976	-0.772455	0.410788		-0.178022	0.454988	-0.902222
-0.162393	0.0107527	0.177665		-0.952719	0.585903	-0.254658		0.153846	0.506276	-0.314607		-0.87191	-0.311355	0.0969529		0.205714	0.020979	0.111111		-0.5625	0.46283	0.0695187
-0.678102	0.543478	0.0434783		-0.232704	0.666667	0.00809717		0.54717	-0.594096	-0.060241		0.138889	0.535865	-0.33617		0.50838	-0.718412	0.703125		-0.862069	0.336603	0.830743
0.956357	0.427395	0.117241		-0.348837	0.493671	-0.852941		0.685714	0.133829	0.410468		0.247834	0.466667	0.245059		-0.882133	0.0928022	0.986733		0.822368	-0.826752	-0.0780669
0.126023	0.551541	0.404725		0.0873786	-0.0561798	0.0378378		-0.563636	0.758242	0.909548		0.673367	0.938028	-0.764		0.710843	0.0148368	-0.663377		0.228007	-0.0439024	0.903704
0.5	-0.135647	-0.431964		0.324138	0.799802	-0.805031		0.297071	0.435768	0.0441767		-0.160437	0.772152	0.842829		-0.899281	0.140187	-0.422414		0.710214	0.183673	0.936694
-0.670804	0.243421	-0.4		0.122346	0.483871	0.508197		-0.0289608	0.265455	0.0138408		-0.146217	0.918758	0.383028		-0.878354	0.442516	0.970435		-0.240964	0.692308	0.699851
-0.864979	0.490196	0.101695		0.287671	-0.0655022	-0.291954		0.121076	0.898089	-0.0228471		0.584	0.578989	-0.577222		0.391304	0.932394	-0.840352		-0.0666667	0.641509	-0.425426
0.195711	0.986027	0.313725		0.50838	0.404444	0.859259		0.0100503	0.440217	0.224756		-0.842105	0.424364	0.752212		0.295107	0.00192308	0.452577		0.138528	0.326923	-0.757426
0.508021	0.129239	-0.206612		0.556604	0.0461539	0.505085		0.151899	-0.0526316	-0.178947		0.139159	-0.75188	-0.707521		0.252874	0.339192	-0.537234		0.300613	-0.216362	0.00740741
0.325843	0.116883	-0.352941		0.208914	0.135747	0.48046		-0.595074	0.0249633	-0.123457		-0.598031	0.524611	0.322946		0.0976	0.279133	-0.575119		-0.222222	0.608696	-0.218391
0.030303	0.492447	0.0162866		-0.149533	-0.598485	0.493976		0.198347	0.840948			0.621622	0.958525	-0.495868		0.578558	-0.793269	0.967676		-0.775281	-0.835294	-0.771429
0.380282	0.794195	0.00542215		-0.480702	0.351562	0.00518135		-0.81682	-0.137931			-0.457143	-0.123153	0.390663		0.901961	0.349823	-0.688915		-0.97037	-0.575928	0.183099
-0.37931	0.515982	0.213115		0.0989011	0.13253	-0.220339		-0.400778	0.835616			0.57764	0.644699	-0.0443407		0.923875	-0.668293	-0.772632		0.594118	0.0823529
-0.287425	-0.32	-0.32028		-0.124088	0.320955	-0.551282		0.21875	0.608696			-0.237209	0.93087	-0.125896		0.615385	-0.609562	-0.507415		0.0909091	-0.0351288
-0.101449	0.529623	-0.521367		-0.54386	0.227787	-0.0736842		-0.207547	0.130952				0.00497512	0.564132			-0.138365	-0.0164474			-0.385514
-0.0666667	0.83964	-0.340206		-0.855011	0.400545	-0.990148		-0.303922	0.368771				0.874214	-0.945813			0.98497				0.709184
-0.395226	0.650572			-0.426523	0.643341	0.855586			0.309973				0.458823	-0.936639			0.73057				-0.435644
0.274854	-0.165048			-0.424242	0.19802	0.106667			0.107345				0.614583	0.0936374			0.190476				-0.839721
0.955947	0.616438				0.64878	0.292683			0.253012				0.166667	0.77037
0.28	0.689956				0.108108				0.900585
0.44	0.146667				0.401709				0.766355
-0.377246					0.28				-0.264574
-0.528455									0.168142
