# Supplementary material for: Optogenetic induction of appetitive and aversive taste memories in Drosophila
Source: eLife. 2023 Sep 26;12:e81535. doi: 10.7554/eLife.81535 (PMC10561975; doi:10.7554/eLife.81535)
Supplement: Figure 6—source data 1. [file elife-81535-fig6-data1.xlsx]

## Sheet: Sheet1
Training				Testing
PI no: R30E11/TRPA1 ; R58E02/Chrimson	PI +: R30E11/TRPA1 ; R58E02/Chrimson	PI +: R30E11 ; R58E02/Chrimson		PI no: R30E11/TRPA1 ; R58E02/Chrimson	PI +: R30E11/TRPA1 ; R58E02/Chrimson	PI +: R30E11 ; R58E02/Chrimson
-0.119497	-0.893617	0.886804		-0.0367893	-0.564626	0.640111
-0.770115	-0.538462	0.173913		-0.793548	0.856932	0.123967
0.846724	-0.787879	-0.333333		-0.0406504	0.946324	0.180223
-0.864078	-0.355932	-0.153846		0.131175	0.412587	0.113553
-0.907692	-0.0505051	-0.432099		0.546667	-0.747573	0.899355
0.378531	-0.424658	-0.65		0.336842	0.702959	-0.84
-0.506173	0.729242	-0.682927		-0.426667	0.346154	-0.294915
-0.900293	-0.0259067	-0.454545		0.194286	0.900581	0.377358
-0.760618	-0.132404	0.941973		-0.479675	-0.52	0.089372
0.111111	-0.645933	0.414286		0.217391	-0.568063	-0.333333
-0.075	0.644991	-0.622047		0.417166	0.296241	0.302326
0.0454545	-0.553191	-0.528571		-0.55814	0.328904	0.152025
-0.908046	0.113173	-0.682927		-0.242481	0.491272	-0.825726
-0.946188	-0.6375	-0.37931		-0.516199	0.428571	-0.847898
-0.842349	-0.596958	0.6		-0.275109	-0.205357	-0.90172
0.176471	-0.853856	0.786164		0.0704225	-0.0558376	0.268456
-0.166667	0.222222	-0.652174		-0.883721	0.178082	-0.618557
0.605072	-0.464481	-0.885714		0.337349	0.987027	-0.308594
0.884956	0.987008	-0.880597			0.826341	-0.78135
0.5	-0.798942	-0.993122			0.497053	-0.642202
-0.0139104	-0.6	-0.886792			-0.301205	0.263736
	-0.606061	-0.952456			-0.425287	0.524664
0.826758	-0.214286	-0.937947			0.726589
0.321429	-0.238095	0.395349			0.698452
0.560976	-0.444444	-0.89781			0.555556
-0.254902	-0.183673	-0.142857			0.328467
		0.114754			0.0848921
		-0.794521			0.550898
					0.761006
