# Supplementary material for: Optogenetic induction of appetitive and aversive taste memories in Drosophila
Source: eLife journal article supplement (doi:10.7554/elife.81535), 2023-09-26

A

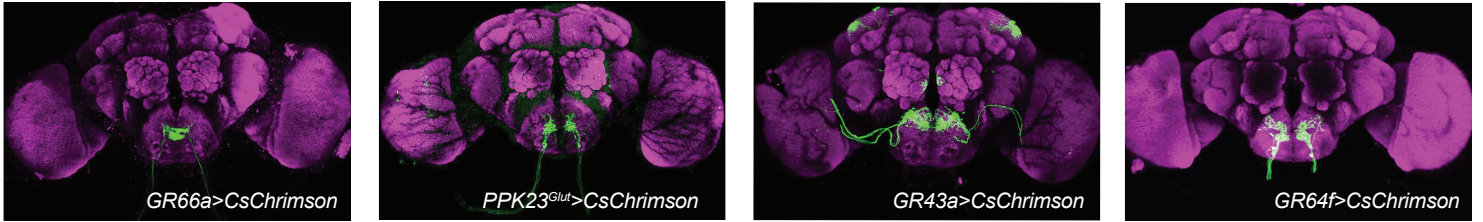

B

**Aversive**  
Short-Term Memory

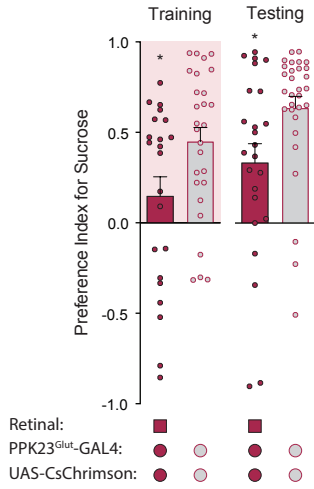

C

**Appetitive**  
Short-Term Memory

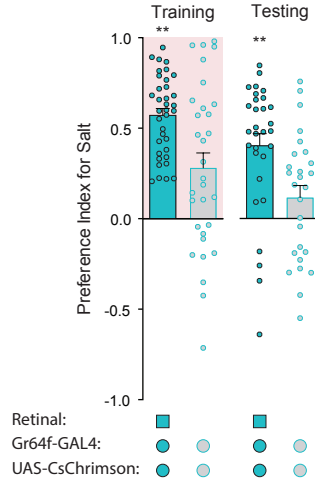

D

**Appetitive**  
Long-Term Memory

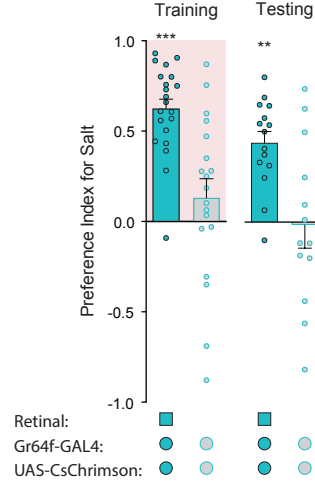

E

**Aversive**  
Long-Term Memory

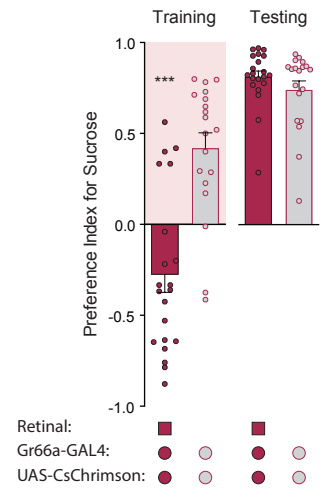

Supplement: supp [file elife_poa_e81535_Figure_1_figure_supplement_1.pdf › elife_poa_e81535_Figure_1_figure_supplement_1.pdf]
