# Supplementary material for: Optogenetic induction of appetitive and aversive taste memories in Drosophila
Source: eLife journal article supplement (doi:10.7554/elife.81535), 2023-09-26

# **A** Appetitive Short-Term Memory Assay

CS<sup>+</sup> : 75 mM NaCl  
CS<sup>-</sup> : agar

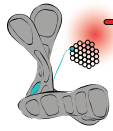

MB Activated PAM- $\alpha$ 1 DANs  
Reward

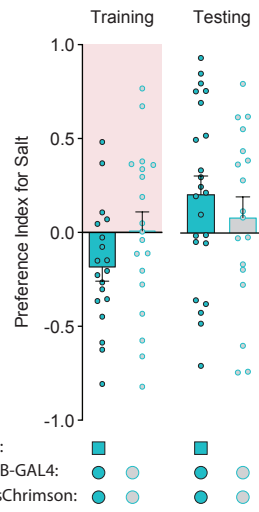

# **B** Appetitive Long-Term Memory Assay

CS<sup>+</sup> : 75 mM NaCl  
CS<sup>-</sup> : agar

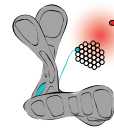

MB Activated PAM- $\alpha$ 1 DANs  
Reward

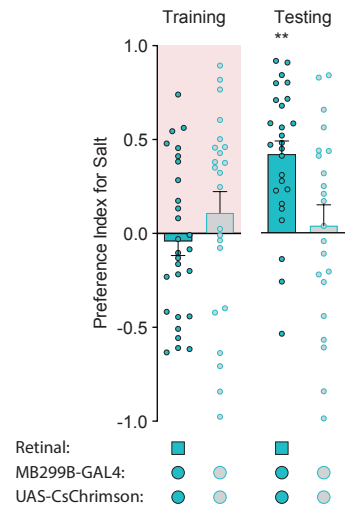

Supplement: supp [file elife_poa_e81535_Figure_4_figure_supplement_1.pdf › elife_poa_e81535_Figure_4_figure_supplement_1.pdf]
