# Supplementary figures and images for: Optogenetic induction of appetitive and aversive taste memories in Drosophila
Source: eLife journal article supplement (doi:10.7554/elife.81535), 2023-09-26

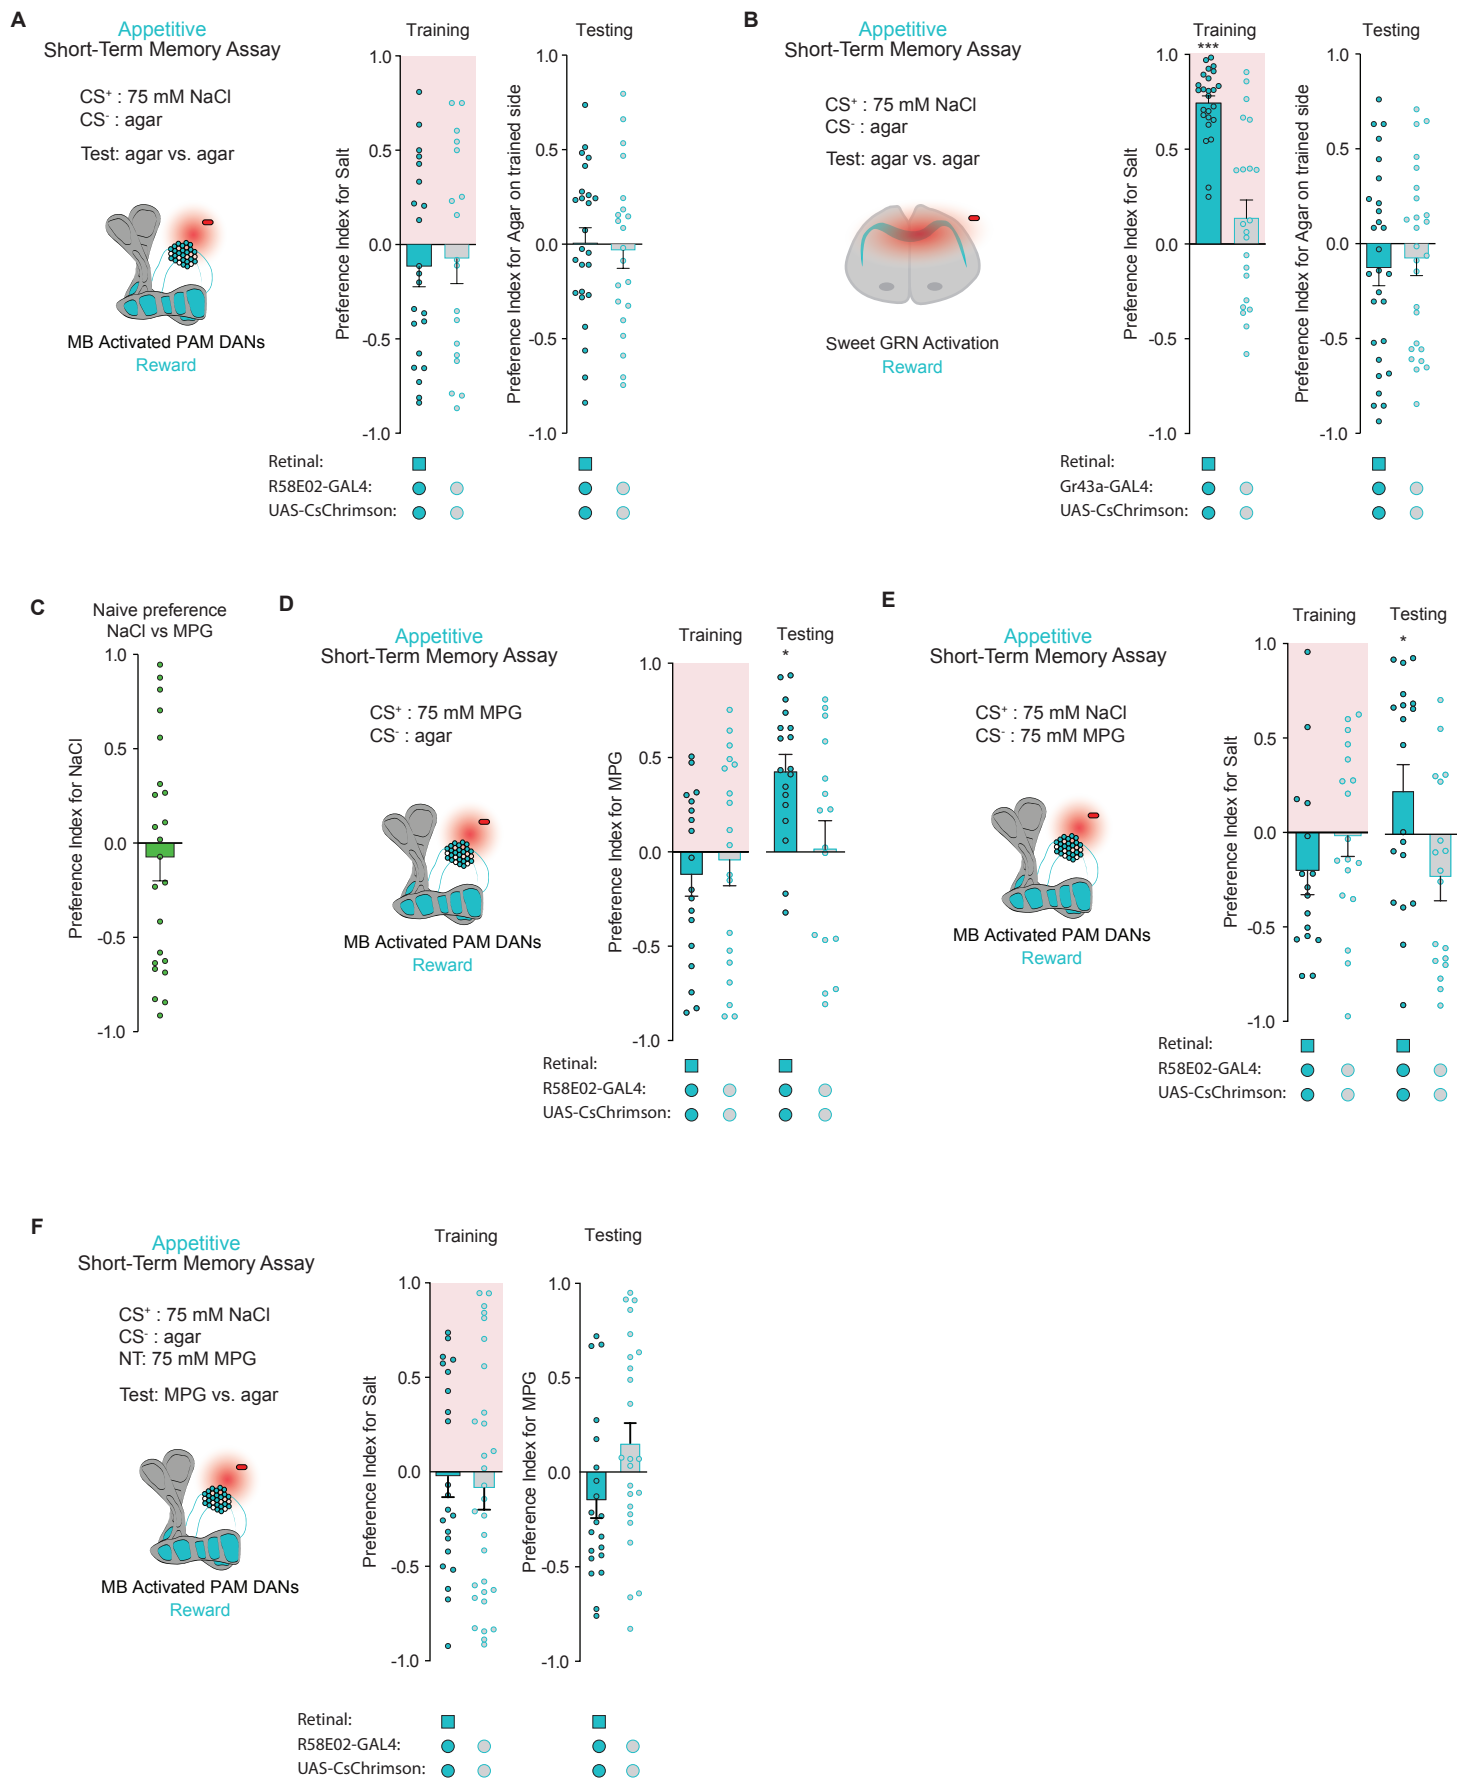

Supplement: supp [file elife_poa_e81535_Figure_2_figure_supplement_1.pdf › elife_poa_e81535_Figure_2_figure_supplement_1.pdf]
